# Supplementary material for: In vitro analysis of the segmental flexibility of the thoracic spine
Source: PLoS One. 2017 May 16;12(5):e0177823. doi: 10.1371/journal.pone.0177823 (PMC5433776; doi:10.1371/journal.pone.0177823)
Supplement: S1 Dataset — The data including all ROM and NZ values in all six loading directions of the present in vitro study are summarized. Additionally, neutral zone stiffness (NZS), elastic zone stiffness (EZS), and hysteresis area are listed. (XLSX) [file pone.0177823.s001.xlsx]

## Sheet: Flexion+Extension
Segmental level	Moment in Nm	ROM+ (Flexion) in °	ROM- (Extension) in °	ROM± (Flex+Ex) in °	NZ+ (Flexion) in °	NZ- (Extension) in °	NZ± (Flex+Ex) in °	NZS+ (Flexion) in Nm/°	NZS- (Extension) in Nm/°	EZS+ (Flexion) in Nm/°	EZS- (Extension) in Nm/°	Hysteresis area in Nm°
T1-T2 (n=6)	7.5	6.5057	-6.3919	12.8977	2.0201	-2.0584	4.0785	0.16483	0.23055	2.8035	2.3719	17.966
	7.5	7.2097	-7.1707	14.3804	1.1122	-1.3155	2.4278	0.2302	0.4461	2.6413	2.2701	17.241
	7.5	7.8348	-6.7983	14.6331	2.2498	-1.4393	3.689	0.095949	0.15846	2.7137	2.3182	15.5611
	7.5	7.6864	-6.904	14.5905	2.5017	-1.6206	4.1223	0.12275	0.17781	2.3436	2.0817	16.9927
	7.5	6.9643	-6.5805	13.5447	1.7927	-0.96533	2.758	0.1669	0.37699	2.6406	2.067	16.8525
	7.5	6.3618	-6.1125	12.4743	2.8927	-2.4818	5.3745	0.20748	0.26956	3.3454	3.4058	19.5947
Mean	-	7.09378	-6.65965	13.7535	2.09487	-1.64682	3.74168	0.164685	0.276578	2.74802	2.41912	17.368
SD	-	0.549567	0.345792	0.844552	0.561038	0.497417	0.96791	0.0458471	0.103839	0.302104	0.455705	1.22498
T2-T3 (n=6)	7.5	3.1103	-3.0735	6.1838	0.83212	-0.87987	1.712	1.0235	1.2233	2.5708	2.8098	14.3053
	7.5	4.4389	-4.527	8.9659	0.97135	-1.8771	2.8484	0.29636	0.48454	4.2521	3.1475	13.1484
	7.5	2.9478	-2.8672	5.815	0.78262	-0.65797	1.4406	0.86795	0.94626	4.3313	3.7119	10.3489
	7.5	1.5535	-1.4603	3.0138	0.30799	-0.43748	0.74548	3.2748	3.3217	7.5573	5.4457	7.7821
	7.5	7.1856	-6.6231	13.8087	2.2934	-1.8577	4.1511	0.16988	0.24476	3.044	2.5065	16.1682
	7.5	5.3838	-5.5983	10.9822	1.4163	-1.3211	2.7374	0.34701	0.57021	2.8909	2.2513	15.7225
Mean	-	4.10332	-4.0249	8.12823	1.10063	-1.17187	2.2725	0.996583	1.1318	4.10773	3.31212	12.9126
SD	-	1.82919	1.74647	3.56847	0.624575	0.559563	1.11168	1.06483	1.02953	1.68051	1.0619	2.98285
T3-T4 (n=6)	7.5	5.2058	-5.0492	10.2549	1.0887	-1.1305	2.2192	0.30634	0.52122	3.1766	2.8545	15.3881
	7.5	4.0234	-4.0374	8.0608	0.7108	-0.81121	1.522	0.66681	0.997	3.6671	2.514	13.5761
	7.5	3.6308	-3.3799	7.0108	0.93165	-0.59524	1.5269	0.55724	0.85045	4.5189	3.8091	10.9198
	7.5	4.6954	-4.8424	9.5377	1.3227	-1.9179	3.2406	0.36984	0.55384	3.678	2.2689	16.2863
	7.5	2.3767	-2.4192	4.7959	0.37399	-0.44873	0.82272	1.4347	1.3576	3.3859	4.1989	8.5023
	7.5	2.9705	-2.9901	5.9607	0.6298	-0.53043	1.1602	0.76448	1.3258	4.276	3.0283	9.3948
Mean	-	3.8171	-3.78637	7.60347	0.84294	-0.905668	1.7486	0.683235	0.934318	3.78375	3.11228	12.3446
SD	-	0.963384	0.952311	1.91106	0.311245	0.504983	0.790727	0.371419	0.331361	0.471604	0.684231	2.93857
T4-T5 (n=7)	7.5	3.2717	-2.9938	6.2655	1.154	-0.93243	2.0864	0.70549	0.64756	4.2816	4.5364	11.9151
	7.5	4.39	-4.2932	8.6832	1.2414	-0.82473	2.0661	0.50495	0.53945	3.3465	2.7786	15.0647
	7.5	4.434	-4.3646	8.7986	0.96239	-0.97065	1.933	0.5391	0.58329	3.35	3.615	14.4506
	7.5	2.5834	-2.6581	5.2415	0.81568	-0.7585	1.5742	1.247	1.3347	4.6788	3.665	11.5189
	7.5	3.2558	-3.1137	6.3695	0.85182	-0.74806	1.5999	0.7146	0.6962	3.259	4.0057	11.1726
	7.5	2.4619	-2.4185	4.8803	0.77816	-0.82817	1.6063	0.6687	0.77268	5.3459	4.8298	8.7185
	7.5	3.2519	-3.1949	6.4469	0.65223	-0.84546	1.4977	0.61195	1.0578	3.5122	3.1663	11.4427
Mean	-	3.37839	-3.29097	6.66936	0.92224	-0.844	1.76623	0.713113	0.804526	3.96771	3.79954	12.0404
SD	-	0.722302	0.701818	1.42083	0.195363	0.0765309	0.233749	0.230191	0.26775	0.754114	0.670007	1.97804
T5-T6 (n=6)	7.5	5.9711	-5.7445	11.7156	1.4721	-1.5986	3.0708	0.39187	0.42335	2.174	2.1761	20.6626
	7.5	3.1065	-3.0387	6.1452	0.61859	-0.71927	1.3379	0.60326	1.0094	4.8874	3.7904	9.6531
	7.5	3.6434	-3.6041	7.2474	0.49469	-0.69573	1.1904	0.70409	1.2743	4.7705	2.0878	11.4322
	7.5	2.9941	-2.9598	5.9539	0.49567	-0.48179	0.97747	1.3259	1.6943	4.1474	2.8602	10.3088
	7.5	2.3402	-2.3356	4.6757	0.36814	-0.68102	1.0492	1.0219	1.4867	4.7736	4.4361	8.3087
	7.5	5.2282	-5.2768	10.505	2.1345	-2.0583	4.1928	0.3749	0.47764	2.561	2.9671	23.4287
Mean	-	3.88058	-3.82658	7.70713	0.930615	-1.03912	1.96976	0.736987	1.06095	3.88565	3.05295	13.9657
SD	-	1.29102	1.2534	2.5433	0.650063	0.57891	1.22426	0.340874	0.479123	1.10513	0.836843	5.84221
T6-T7 (n=6)	7.5	4.205	-4.1326	8.3377	1.2722	-0.87074	2.1429	0.41274	0.70197	3.823	2.9705	13.3185
	7.5	3.4986	-3.5458	7.0444	0.57653	-0.59695	1.1735	0.85816	1.3751	3.7223	2.6481	10.3831
	7.5	3.902	-3.8924	7.7944	1.0008	-0.9778	1.9786	0.56514	0.79952	3.2992	2.4247	14.8412
	7.5	5.5324	-5.4264	10.9588	1.771	-1.0903	2.8613	0.27829	0.45919	3.1636	1.9264	15.3996
	7.5	3.4798	-3.3975	6.8773	0.71613	-0.78309	1.4992	0.76734	1.2158	4.6814	2.486	12.1422
	7.5	2.728	-2.042	4.77	0.58056	-0.67423	1.2548	0.81366	1.9246	4.7164	4.4252	9.8141
Mean	-	3.89097	-3.73945	7.63043	0.986203	-0.832185	1.81838	0.615888	1.07936	3.90098	2.81348	12.6498
SD	-	0.862993	1.00495	1.85732	0.428803	0.169317	0.585097	0.21547	0.487486	0.60798	0.784745	2.09155
T7-T8 (n=7)	7.5	3.1185	-3.1578	6.2763	0.8318	-0.91154	1.7433	0.9026	1.5732	4.295	3.4398	13.8109
	7.5	3.6182	-3.6109	7.229	0.6292	-0.66119	1.2904	0.66024	1.0231	4.1952	2.9626	11.4231
	7.5	3.1219	-3.0457	6.1676	0.49115	-0.6503	1.1415	0.79715	1.4063	4.564	2.9539	10.264
	7.5	2.5992	-2.6512	5.2504	0.29417	-0.38612	0.68029	1.2511	1.8497	5.3329	3.6298	7.7991
	7.5	2.1116	-2.1614	4.273	0.74305	-0.63096	1.374	1.0452	0.77318	4.2438	4.6107	8.2248
	7.5	2.7255	-2.7854	5.5108	0.39911	-1.0302	1.4293	1.5878	1.1463	3.8696	3.4294	11.1762
	7.5	2.1971	-2.3221	4.5192	0.73157	-0.50817	1.2397	1.3028	1.3727	5.5948	3.6851	9.4143
Mean	-	2.78457	-2.81921	5.60376	0.588579	-0.68264	1.27121	1.07813	1.30635	4.58504	3.53019	10.3018
SD	-	0.500871	0.463206	0.963055	0.184074	0.205542	0.298998	0.298959	0.331866	0.590853	0.517414	1.91618
T8-T9 (n=6)	7.5	2.5579	-2.6794	5.2373	0.46205	-0.93461	1.3967	1.2006	0.8296	4.2376	5.1885	8.6726
	7.5	3.6886	-3.8678	7.5563	0.51335	-0.51511	1.0285	0.86226	1.3177	5.0205	2.2513	9.7579
	7.5	4.2524	-4.175	8.4274	1.4825	-0.81642	2.2989	0.45518	0.60595	3.9783	2.4654	13.4889
	7.5	2.9533	-2.9435	5.8968	0.58899	-0.66584	1.2548	1.4169	1.3841	4.7374	2.8934	10.3409
	7.5	2.2408	-2.2712	4.5119	0.48402	-0.37364	0.85766	1.708	2.0523	5.2913	3.9772	7.6086
	7.5	3.6664	-3.0045	6.6708	0.67949	-0.82638	1.5059	0.69561	1.6287	4.3126	3.0636	11.9978
Mean	-	3.22657	-3.1569	6.38342	0.701733	-0.688667	1.39041	1.05642	1.30306	4.59628	3.30657	10.3111
SD	-	0.701521	0.661204	1.33473	0.356637	0.193932	0.460421	0.429081	0.480332	0.460788	1.00352	1.96801
T9-T10 (n=6)	7.5	2.5061	-2.5161	5.0222	0.7577	-0.59845	1.3561	0.70213	0.68548	4.9868	3.5486	8.6929
	7.5	4.3177	-4.386	8.7037	1.2358	-1.261	2.4968	0.37613	0.41506	4.399	3.1371	13.2594
	7.5	4.4996	-4.4069	8.9065	1.4522	-1.0532	2.5055	0.40183	0.34661	3.9289	3.1114	13.7441
	7.5	4.175	-4.0783	8.2533	0.68333	-0.4737	1.157	0.52098	1.1414	3.3236	2.5192	11.9394
	7.5	2.9689	-2.9905	5.9595	0.43871	-0.36777	0.80649	1.6188	1.8348	3.7614	2.2556	10.8213
	7.5	2.7849	-2.7216	5.5065	0.76885	-0.28105	1.0499	1.4598	1.4697	4.3886	3.7313	11.2516
Mean	-	3.54203	-3.51657	7.05862	0.889432	-0.672528	1.56197	0.846612	0.982175	4.13138	3.05053	11.6181
SD	-	0.805619	0.793075	1.59752	0.345012	0.361101	0.683557	0.503052	0.548269	0.532278	0.522326	1.66548
T10-T11 (n=6)	7.5	3.9502	-3.9341	7.8843	0.77295	-0.75026	1.5232	0.53427	0.63794	3.6344	3.1579	10.8679
	7.5	2.5008	-2.4543	4.9551	0.4836	-0.3977	0.8813	1.4529	1.7784	4.5367	3.8224	8.6148
	7.5	2.0289	-2.0277	4.0566	0.44935	-0.48026	0.9296	1.5456	2.1348	6.6963	4.7992	7.3859
	7.5	2.0707	-1.8873	3.958	0.37488	-0.38057	0.75545	2.0205	2.4982	4.5208	3.2943	7.5299
	7.5	3.7344	-3.8227	7.5571	0.70357	-0.71061	1.4142	0.74242	1.0823	4.1309	2.7672	11.9036
	7.5	4.1417	-4.3045	8.4462	0.4914	-0.7234	1.2148	0.84688	1.2238	3.8914	2.12	10.7835
Mean	-	3.07112	-3.07177	6.14288	0.545958	-0.5738	1.11976	1.19043	1.55924	4.56842	3.32683	9.51427
SD	-	0.891739	0.974804	1.86525	0.142497	0.157763	0.284088	0.52175	0.638975	1.00443	0.837922	1.75256
T11-T12 (n=6)	7.5	3.0347	-2.9973	6.0321	0.46953	-0.45154	0.92108	1.2043	1.7195	4.1123	2.5137	9.842
	7.5	4.404	-4.5278	8.9318	0.6599	-1.2325	1.8924	0.39594	0.57581	4.4563	3.3544	12.5836
	7.5	4.1589	-4.1035	8.2624	0.67304	-0.73308	1.4061	0.60989	1.2312	3.5748	2.2236	13.5385
	7.5	3.8986	-3.8773	7.7758	0.99747	-0.99276	1.9902	0.60833	0.93799	3.499	2.4648	13.7228
	7.5	2.4644	-2.1128	4.5771	0.36302	-0.47827	0.8413	1.421	2.4576	4.572	2.9127	8.3963
	7.5	3.6408	-3.5967	7.2376	0.58633	-0.56411	1.1504	0.58494	0.97389	4.5475	3.2132	8.6976
Mean	-	3.60023	-3.5359	7.13613	0.624882	-0.742043	1.36691	0.804067	1.316	4.12698	2.7804	11.1301
SD	-	0.665678	0.789682	1.45373	0.198561	0.285516	0.444986	0.372244	0.616585	0.443999	0.41131	2.2243

## Sheet: Lateral bending
Segmental level	Moment in Nm	ROM+ (LB right) in °	ROM- (LB left) in °	ROM± (LB right+left) in °	NZ+ (LB right) in °	NZ- (LB left) in °	NZ± (LB right+left) in °	NZS+ (LB right) in Nm/°	NZS- (LB left) in Nm/°	EZS+ (LB right) in Nm/°	EZS- (LB left) in Nm/°	Hysteresis area in Nm°
T1-T2 (n=6)	7.5	4.9151	-4.853	9.7682	1.206	-0.99237	2.1983	0.32132	0.23292	2.7021	3.5109	11.6327
	7.5	7.4566	-7.4926	14.9492	1.387	-1.6605	3.0474	0.1535	0.23657	2.1935	1.803	15.5795
	7.5	5.8747	-5.8344	11.7091	2.6558	-2.1115	4.7673	0.065722	0.076163	3.3805	3.2148	10.5953
	7.5	6.4954	-6.2463	12.7417	2.6777	-2.2988	4.9765	0.1083	0.10085	2.4781	2.5076	17.0396
	7.5	6.4034	-6.2488	12.6522	2.1219	-1.2088	3.3307	0.16086	0.14186	2.4472	2.3759	12.8626
	7.5	4.3031	-4.4315	8.7346	2.2383	-1.5951	3.8335	0.28794	0.19993	4.4818	3.7719	13.6223
Mean	-	5.90805	-5.8511	11.7592	2.04778	-1.64451	3.69228	0.18294	0.164715	2.9472	2.86402	13.5553
SD	-	1.04493	1.00172	2.04343	0.5706	0.458985	0.966387	0.0920502	0.0625802	0.778989	0.690025	2.2053
T2-T3 (n=6)	7.5	5.4931	-5.6587	11.1518	0.98452	-1.4228	2.4073	0.52509	0.35362	2.0983	2.2217	16.8456
	7.5	5.5559	-5.7183	11.2742	1.6239	-1.3526	2.9765	0.20111	0.25439	3.0373	2.7358	14.0994
	7.5	3.4887	-3.4951	6.9838	0.72322	-0.50849	1.2317	0.80689	0.6814	4.0687	3.1448	9.1386
	7.5	3.3264	-3.3171	6.6436	0.91582	-0.94053	1.8563	0.92652	0.9207	3.6385	3.1488	12.8088
	7.5	5.5938	-5.6041	11.198	1.1883	-1.1572	2.3455	0.32785	0.26361	2.6966	2.6422	10.1664
	7.5	5.8005	-6.0717	11.8722	1.2041	-1.7826	2.9867	0.24021	0.26618	2.833	2.2193	12.437
Mean	-	4.8764	-4.9775	9.85393	1.10664	-1.19404	2.30067	0.504612	0.45665	3.06207	2.68543	12.5826
SD	-	1.04394	1.12229	2.16508	0.283449	0.399891	0.616566	0.277808	0.255252	0.640453	0.379135	2.52472
T3-T4 (n=6)	7.5	7.941	-7.9164	15.8574	1.8635	-1.677	3.5405	0.16803	0.18603	1.9187	1.8872	18.522
	7.5	5.5634	-5.6247	11.1881	1.3807	-1.4972	2.8779	0.18033	0.20071	2.481	2.8266	11.9881
	7.5	4.3712	-4.3528	8.724	0.94209	-0.80632	1.7484	0.45054	0.67295	3.1738	2.904	10.8435
	7.5	7.9244	-7.851	15.7755	2.4048	-1.9487	4.3535	0.1348	0.14994	2.0534	2.0206	18.0169
	7.5	3.9571	-3.9376	7.8946	0.55432	-0.71337	1.2677	0.56161	0.70232	3.3004	3.4756	9.9855
	7.5	3.8186	-4.0123	7.8308	0.97697	-1.4019	2.3789	0.27473	0.37508	3.7132	3.687	9.9085
Mean	-	5.59595	-5.6158	11.2117	1.35373	-1.34075	2.69448	0.295007	0.381172	2.77342	2.80017	13.2107
SD	-	1.74484	1.69665	3.44078	0.621261	0.445366	1.0434	0.15844	0.22819	0.665292	0.670248	3.64496
T4-T5 (n=7)	7.5	4.0679	-4.0881	8.156	0.93032	-1.1665	2.0968	0.31988	0.44828	3.687	4.1866	11.3806
	7.5	6.2445	-6.2745	12.519	1.6555	-1.7842	3.4397	0.25091	0.26515	2.0927	2.0984	17.6831
	7.5	5.8493	-5.7365	11.5858	1.7842	-1.3983	3.1825	0.27111	0.25196	2.606	2.7943	15.189
	7.5	3.6485	-3.602	7.2505	0.80468	-0.89778	1.7025	0.83375	0.95633	3.2132	3.0268	12.2657
	7.5	4.8495	-4.8556	9.7051	0.94467	-0.95128	1.8959	0.40677	0.4432	3.1833	2.7822	11.2561
	7.5	5.3759	-5.582	10.9579	1.542	-1.46	3.002	0.27407	0.2553	2.6884	2.6927	14.3681
	7.5	5.2241	-5.4068	10.631	1.3493	-1.4541	2.8034	0.31968	0.33185	2.8192	2.6124	14.2061
Mean	-	5.0371	-5.07793	10.115	1.28724	-1.30174	2.58897	0.38231	0.421724	2.89854	2.88477	13.7641
SD	-	0.859401	0.881176	1.73741	0.36429	0.291461	0.632568	0.190324	0.231788	0.476172	0.593187	2.14361
T5-T6 (n=6)	7.5	6.6738	-6.4657	13.1395	1.7168	-1.8009	3.5177	0.23136	0.21325	1.8267	2.1143	19.7678
	7.5	4.6934	-4.7844	9.4778	1.5369	-1.4643	3.0012	0.22726	0.23275	3.3027	2.5746	12.1268
	7.5	4.2866	-4.3843	8.6709	0.86118	-1.1206	1.9817	0.39032	0.32921	2.8947	3.2399	10.0126
	7.5	4.5041	-4.4305	8.9347	0.58729	-0.57562	1.1629	0.72331	0.731	2.6485	2.6562	10.8359
	7.5	3.4186	-3.7667	7.1853	0.22963	-1.0994	1.329	0.76657	0.63883	3.6342	4.3046	10.0298
	7.5	6.6675	-6.7019	13.3695	2.4192	-2.1401	4.5593	0.22905	0.21621	2.0348	2.1116	20.0977
Mean	-	5.04067	-5.08892	10.1296	1.22517	-1.36682	2.59197	0.427978	0.393542	2.7236	2.83353	13.8118
SD	-	1.21942	1.10062	2.31681	0.741065	0.508925	1.21824	0.23159	0.21134	0.642695	0.76006	4.38595
T6-T7 (n=6)	7.5	4.1315	-4.2967	8.4282	0.89237	-1.0964	1.9888	0.43718	0.42526	3.2543	3.359	10.1395
	7.5	5.0079	-4.9585	9.9664	0.95146	-0.89536	1.8468	0.63982	0.56148	2.2443	2.5237	13.027
	7.5	4.7663	-4.7316	9.498	1.3238	-1.1891	2.5129	0.46544	0.47745	2.657	2.4988	14.6046
	7.5	8.2362	-8.0503	16.2864	1.6748	-1.5526	3.2274	0.19866	0.16703	1.8458	2.2208	15.0005
	7.5	4.7128	-4.631	9.3438	1.0856	-0.90212	1.9877	0.38212	0.46472	2.9326	2.8182	12.102
	7.5	4.0841	-4.0428	8.1269	0.84976	-0.88973	1.7395	0.5841	0.58789	3.1035	3.4214	11.1862
Mean	-	5.15647	-5.11848	10.275	1.12963	-1.08755	2.21718	0.45122	0.447305	2.67292	2.80698	12.6766
SD	-	1.41753	1.34418	2.76068	0.289602	0.237036	0.512863	0.142705	0.137266	0.493108	0.447436	1.74302
T7-T8 (n=7)	7.5	3.3291	-3.247	6.5762	0.69346	-0.5583	1.2518	1.0847	0.96814	3.168	3.6342	10.3473
	7.5	5.1236	-5.2143	10.3379	1.0586	-1.1579	2.2164	0.38512	0.40087	2.6597	2.4377	12.616
	7.5	3.5323	-3.6255	7.1577	0.55651	-0.76903	1.3255	0.46309	0.50372	4.422	3.8636	7.9802
	7.5	3.9458	-4.0318	7.9776	0.60015	-0.59072	1.1909	0.72569	0.84156	3.3761	2.6841	9.1157
	7.5	2.8871	-2.8976	5.7846	0.53118	-0.71238	1.2436	1.0501	0.73218	3.5099	4.2749	8.1543
	7.5	4.3569	-4.3604	8.7172	0.78081	-1.3903	2.1711	0.64401	0.7064	2.4743	2.4468	13.4735
	7.5	2.6889	-2.6499	5.3388	0.46277	-0.62024	1.083	1.3232	1.3797	4.0615	4.0181	8.5457
Mean	-	3.69481	-3.71807	7.41286	0.669069	-0.82841	1.49747	0.810844	0.790367	3.38164	3.33706	10.0332
SD	-	0.789865	0.827591	1.61662	0.186627	0.296181	0.445739	0.323377	0.29901	0.649301	0.730622	2.04955
T8-T9 (n=6)	7.5	2.681	-2.7505	5.4315	0.55801	-0.67103	1.229	1.1922	1.3235	3.9016	3.7688	8.1752
	7.5	4.1067	-4.1813	8.2879	0.65143	-0.37861	1.03	0.78339	0.52451	2.8435	3.2694	9.0127
	7.5	5.0228	-5.0445	10.0673	1.039	-1.0106	2.0496	0.34835	0.34191	2.8772	2.9781	11.6903
	7.5	3.8216	-3.8566	7.6783	0.643	-0.56904	1.212	0.85087	0.77369	3.0797	3.166	9.5165
	7.5	3.583	-3.5185	7.1015	0.71143	-0.58825	1.2997	0.84559	0.72853	3.3434	4.2021	9.6788
	7.5	3.8533	-3.741	7.5943	0.95798	-1.0961	2.054	0.52386	0.59504	3.5924	3.3445	12.1821
Mean	-	3.84473	-3.84873	7.69347	0.760142	-0.718938	1.47905	0.757377	0.71453	3.27297	3.45482	10.0426
SD	-	0.692803	0.691291	1.38235	0.175913	0.253306	0.413067	0.267115	0.306532	0.383102	0.411145	1.42883
T9-T10 (n=6)	7.5	2.8651	-2.8547	5.7197	0.75281	-0.7173	1.4701	0.75753	0.82353	4.5208	4.4056	7.8964
	7.5	5.1092	-5.163	10.2721	1.8586	-1.5548	3.4134	0.20311	0.24593	2.9182	2.6288	14.1404
	7.5	5.8915	-6.0614	11.9529	2.33	-2.5177	4.8477	0.11649	0.13607	2.7916	2.6915	13.5437
	7.5	5.2891	-5.3292	10.6183	1.3769	-1.3609	2.7378	0.2386	0.30473	3.0946	2.6378	13.2751
	7.5	3.4311	-3.4016	6.8327	0.51992	-0.48426	1.0042	1.1737	1.1242	2.612	3.4997	10.2868
	7.5	4.1824	-4.0888	8.2712	1.1157	-0.46782	1.5835	0.73312	0.78887	2.4422	3.0048	13.4056
Mean	-	4.4614	-4.48312	8.94448	1.32566	-1.1838	2.50945	0.537092	0.570555	3.06323	3.1447	12.0913
SD	-	1.06751	1.12886	2.19571	0.621397	0.726625	1.3254	0.380753	0.361248	0.6843	0.640827	2.24687
T10-T11 (n=6)	7.5	3.8034	-4.3304	8.1338	0.71575	-0.60763	1.3234	0.46949	0.42939	3.8647	3.4669	8.9379
	7.5	3.6414	-3.7287	7.3701	0.73271	-0.78624	1.519	0.8077	0.75248	2.9595	3.17	11.4595
	7.5	3.5458	-3.5813	7.1271	0.4997	-0.67822	1.1779	0.71559	0.69243	3.2254	3.8198	8.4422
	7.5	2.9268	-2.9943	5.9211	0.57837	-0.50373	1.0821	1.4827	1.5237	2.8868	2.8294	9.0842
	7.5	4.509	-4.4893	8.9983	0.60093	-0.62552	1.2264	0.73858	0.62256	2.361	2.5953	9.8879
	7.5	5.1306	-5.2438	10.3744	0.59715	-0.55125	1.1484	0.55014	0.55241	2.5262	2.3041	7.976
Mean	-	3.92617	-4.0613	7.98747	0.620768	-0.625432	1.2462	0.794033	0.762162	2.9706	3.03092	9.29795
SD	-	0.710625	0.722659	1.42196	0.0805802	0.0906247	0.142554	0.328758	0.355696	0.489998	0.514846	1.13104
T11-T12 (n=6)	7.5	3.7095	-3.8219	7.5314	0.39521	-0.58707	0.98228	1.0187	0.94774	2.9734	3.2185	9.7818
	7.5	4.0548	-4.0309	8.0857	1.0382	-0.98761	2.0258	0.38856	0.41407	3.5662	3.1895	10.7431
	7.5	4.0335	-4.0226	8.0561	0.86191	-0.81254	1.6744	0.46872	0.70179	2.9614	3.181	11.6585
	7.5	3.2671	-3.3407	6.6078	0.75246	-0.68034	1.4328	0.83133	0.84712	3.0871	3.2724	10.9173
	7.5	3.0563	-3.0147	6.071	0.40935	-0.47439	0.88374	1.3879	1.3511	2.9819	3.2795	9.9087
	7.5	4.9207	-4.937	9.8577	0.89036	-1.2868	2.1772	0.36111	0.39989	2.6581	2.531	11.0611
Mean	-	3.84032	-3.8613	7.70162	0.724582	-0.804792	1.52937	0.74272	0.776952	3.03802	3.11198	10.6784
SD	-	0.607032	0.605698	1.21149	0.24267	0.270145	0.48522	0.37559	0.327426	0.270468	0.262506	0.653789

## Sheet: Axial rotation
Segmental level	Moment in Nm	ROM+ (AR left) in °	ROM- (AR right) in °	ROM± (AR left+right) in °	NZ+ (AR left) in °	NZ- (AR right) in °	NZ± (AR left+right) in °	NZS+ (AR left) in Nm/°	NZS- (AR right) in Nm/°	EZS+ (AR left) in Nm/°	EZS- (AR right) in Nm/°	Hysteresis area in Nm°
T1-T2 (n=6)	7.5	4.9358	-4.811	9.7467	0.94887	-0.90323	1.8521	0.14148	0.40766	2.8183	2.4687	9.7626
	7.5	6.3065	-6.3872	12.6938	1.1626	-0.8669	2.0295	0.12345	0.2137	2.8798	2.099	9.5129
	7.5	7.5151	-7.6011	15.1162	1.0885	-1.1902	2.2788	0.087848	0.084068	2.1908	2.2307	10.4857
	7.5	6.9795	-6.9605	13.9401	1.1721	-0.61126	1.7834	0.12402	0.087779	2.2323	2.1663	10.9873
	7.5	6.7853	-6.8219	13.6072	0.64883	-0.96244	1.6113	0.10428	0.15449	2.146	2.159	10.3549
	7.5	4.6866	-4.7632	9.4499	0.45716	-0.77142	1.2286	0.42379	0.39907	2.8924	2.8743	11.0043
Mean	-	6.20147	-6.22415	12.4256	0.91301	-0.884242	1.79728	0.167478	0.224461	2.5266	2.333	10.3513
SD	-	1.04719	1.07653	2.12259	0.270523	0.17684	0.328373	0.115855	0.133825	0.338595	0.269167	0.562504
T2-T3 (n=6)	7.5	4.7958	-4.845	9.6408	1.4509	-1.2588	2.7097	0.60489	0.4432	1.9738	1.8454	15.8072
	7.5	5.4801	-5.4362	10.9164	1.1097	-1.1907	2.3004	0.12955	0.16652	4.0344	3.413	7.9594
	7.5	3.9784	-3.8932	7.8716	0.63082	-0.78379	1.4146	0.47238	0.72838	2.8785	2.8567	8.7768
	7.5	2.6255	-2.6129	5.2384	0.40766	-0.50608	0.91374	1.8421	1.773	3.439	3.0887	8.1238
	7.5	6.8138	-7.1054	13.9191	0.70863	-1.5794	2.2881	0.09718	0.1327	2.6003	2.4997	8.8745
	7.5	6.2147	-6.4554	12.6701	0.56802	-0.59914	1.1672	0.22525	0.20189	2.762	3.0546	8.692
Mean	-	4.98472	-5.05802	10.0427	0.812622	-0.986318	1.79896	0.561892	0.574282	2.948	2.79302	9.70562
SD	-	1.3975	1.50932	2.90544	0.356685	0.384993	0.664657	0.600694	0.574136	0.649453	0.504695	2.74959
T3-T4 (n=6)	7.5	6.2776	-6.5334	12.8109	0.98608	-1.0651	2.0512	0.21975	0.20979	2.5126	2.3388	11.2153
	7.5	7.4172	-7.1454	14.5626	1.3214	-1.2941	2.6154	0.13481	0.1941	2.1909	2.3439	14.1058
	7.5	4.8786	-4.9372	9.8159	0.62465	-0.90348	1.5281	0.26436	0.45418	2.9518	2.8039	9.9922
	7.5	6.9858	-6.9412	13.927	1.249	-1.2478	2.4968	0.15139	0.25084	2.144	2.0058	13.5629
	7.5	4.585	-4.6013	9.1863	0.97567	-0.75381	1.7295	0.37984	0.45242	2.6088	2.5907	10.6912
	7.5	4.8034	-4.8176	9.621	0.66944	-0.63555	1.305	0.28988	0.31915	2.8453	2.9325	7.7397
Mean	-	5.8246	-5.82935	11.654	0.97104	-0.983307	1.95433	0.240005	0.313413	2.54223	2.5026	11.2179
SD	-	1.12282	1.06392	2.18198	0.261792	0.24263	0.4821	0.0836295	0.106505	0.301918	0.311497	2.14929
T4-T5 (n=7)	7.5	4.5085	-4.5558	9.0643	0.72238	-0.71167	1.4341	0.32298	0.32739	3.1817	3.066	8.8976
	7.5	6.307	-6.3565	12.6635	1.155	-1.1751	2.33	0.24329	0.23429	2.3831	2.3232	12.9622
	7.5	6.2167	-6.1312	12.3479	1.2801	-1.4323	2.7124	0.18795	0.292	2.4256	2.3046	14.2784
	7.5	3.806	-3.7897	7.5957	0.62888	-0.68953	1.3184	0.87429	0.86246	2.8999	2.6556	9.267
	7.5	5.2566	-5.2948	10.5514	0.8076	-0.63996	1.4476	0.33986	0.29105	2.6897	2.6665	10.0316
	7.5	4.7454	-4.6612	9.4065	1.1091	-1.0941	2.2032	0.2836	0.27935	2.9904	3.0648	10.623
	7.5	5.5272	-5.5476	11.0748	1.0424	-0.98173	2.0241	0.28225	0.21254	2.458	2.9916	9.9052
Mean	-	5.19534	-5.19097	10.3863	0.963637	-0.960627	1.92426	0.362031	0.357011	2.71834	2.72461	10.8521
SD	-	0.844927	0.847527	1.69157	0.226384	0.27387	0.493977	0.214258	0.209386	0.289917	0.304546	1.8573
T5-T6 (n=6)	7.5	7.3179	-7.393	14.7109	1.5172	-1.5744	3.0916	0.14614	0.1351	2.2433	2.4403	11.9692
	7.5	5.5246	-5.5993	11.1239	1.047	-0.98548	2.0325	0.18418	0.15918	2.7324	2.6617	8.8395
	7.5	5.4598	-5.4109	10.8707	0.9321	-0.8652	1.7973	0.23042	0.26665	2.6354	2.9108	9.2084
	7.5	5.2687	-5.2943	10.5629	0.55893	-0.56708	1.126	0.51157	0.49997	2.1848	2.3576	10.503
	7.5	4.1021	-4.1299	8.2319	0.77844	-0.77441	1.5528	0.33933	0.4681	3.2938	3.2096	8.7058
	7.5	6.3156	-6.6429	12.9585	1.3823	-1.782	3.1643	0.24721	0.23052	2.2785	2.0444	12.3712
Mean	-	5.66478	-5.74505	11.4098	1.03599	-1.09143	2.12742	0.276475	0.293253	2.56137	2.60407	10.2662
SD	-	0.984622	1.03816	2.02008	0.330738	0.437416	0.758923	0.120902	0.141971	0.386043	0.379664	1.47063
T6-T7 (n=6)	7.5	6.1656	-6.0695	12.2351	0.71383	-0.88111	1.5949	0.26727	0.31794	2.5512	2.8771	9.4688
	7.5	5.9349	-5.855	11.7899	0.69037	-0.70342	1.3938	0.40272	0.41965	2.3558	2.4756	10.1844
	7.5	4.7589	-4.7924	9.5514	0.82888	-0.87874	1.7076	0.63385	0.41183	2.5536	2.555	11.341
	7.5	8.4823	-8.2612	16.7435	2.6137	-1.2928	3.9065	0.16019	0.13597	1.9216	2.0189	11.1374
	7.5	5.8982	-5.7814	11.6796	1.2674	-0.84816	2.1155	0.21494	0.17641	2.4745	2.6585	8.6524
	7.5	4.393	-4.4291	8.8221	0.84355	-0.68561	1.5292	0.59697	0.68011	3.0137	2.7748	10.1712
Mean	-	5.93882	-5.86477	11.8036	1.15962	-0.88164	2.04125	0.379323	0.356985	2.4784	2.55998	10.1592
SD	-	1.31048	1.22495	2.53529	0.677517	0.200155	0.863772	0.18271	0.179965	0.322121	0.275781	0.922081
T7-T8 (n=7)	7.5	4.6242	-4.5865	9.2107	0.78981	-0.62192	1.4117	0.39694	0.37523	3.1084	2.9888	9.5966
	7.5	5.2723	-5.2871	10.5594	0.86435	-0.76244	1.6268	0.31173	0.28348	2.7055	2.8538	8.6952
	7.5	4.5892	-4.6568	9.246	0.61095	-0.57286	1.1838	0.32724	0.34263	2.8344	3.1193	7.5925
	7.5	5.7182	-5.6563	11.3745	0.72933	-0.72891	1.4582	0.30038	0.31799	2.4739	2.6412	9.4409
	7.5	4.3991	-4.38	8.7791	0.6531	-0.68904	1.3421	0.36077	0.45863	3.1302	3.1044	8.582
	7.5	5.0117	-5.1004	10.1121	0.90332	-0.90996	1.8133	0.3445	0.3891	2.704	2.422	10.539
	7.5	3.7274	-3.7664	7.4938	0.56035	-0.6817	1.242	0.65354	0.77581	3.1715	3.389	7.9143
Mean	-	4.76316	-4.77621	9.53937	0.730173	-0.709547	1.4397	0.385014	0.42041	2.87541	2.93121	8.90864
SD	-	0.596179	0.581576	1.17672	0.119842	0.100638	0.203472	0.113609	0.154032	0.247275	0.299441	0.947768
T8-T9 (n=6)	7.5	3.9571	-3.9687	7.9258	0.48912	-0.861	1.3501	0.25922	0.46346	4.3335	4.1329	6.7434
	7.5	5.0014	-4.333	9.3343	0.53864	-0.67853	1.2172	0.43425	0.52552	2.9177	2.7207	8.5409
	7.5	7.0654	-7.0182	14.0837	1.146	-1.3548	2.5008	0.15028	0.18361	2.4569	2.5224	10.3534
	7.5	3.973	-3.9983	7.9713	0.6667	-0.3879	1.0546	0.77269	0.57876	2.9962	3.1989	6.3532
	7.5	4.278	-4.2482	8.5262	0.53061	-0.55343	1.084	0.4565	0.51955	3.2817	3.2497	6.924
	7.5	5.3928	-5.3334	10.7263	0.69959	-0.78759	1.4872	0.30701	0.38428	2.7444	2.8298	9.7376
Mean	-	4.94462	-4.81663	9.76127	0.678443	-0.770542	1.44898	0.396658	0.44253	3.12173	3.10907	8.10875
SD	-	1.08516	1.08471	2.15621	0.222275	0.303274	0.493294	0.197494	0.130543	0.596621	0.524258	1.53992
T9-T10 (n=6)	7.5	3.6096	-3.6538	7.2634	0.5979	-0.62017	1.2181	0.5131	0.5608	4.1477	4.0652	5.7154
	7.5	5.6264	-5.4421	11.0685	1.2738	-1.0991	2.3729	0.15323	0.15444	3.0403	3.3351	7.7593
	7.5	6.5507	-6.6579	13.2086	2.0446	-1.7827	3.8273	0.14134	0.12635	2.5924	2.4152	12.9731
	7.5	5.641	-5.6592	11.3002	0.54472	-0.5903	1.135	0.32467	0.34042	2.6951	2.5183	8.832
	7.5	4.9301	-4.9618	9.8918	0.7193	-0.84155	1.5609	0.47698	0.45304	2.5386	2.579	9.8438
	7.5	4.412	-4.3625	8.7745	0.87471	-0.5264	1.4011	0.70677	0.50278	2.4411	2.7165	10.5527
Mean	-	5.1283	-5.12288	10.2512	1.00917	-0.910037	1.91922	0.386015	0.356305	2.9092	2.93822	9.27938
SD	-	0.948069	0.958136	1.904	0.521073	0.435011	0.944282	0.202125	0.166589	0.585054	0.585332	2.26555
T10-T11 (n=6)	7.5	4.7364	-4.8542	9.5906	0.64986	-0.48424	1.1341	0.36862	0.33616	3.5119	3.0917	6.1682
	7.5	3.4961	-3.4507	6.9468	0.35749	-0.35685	0.71434	0.94627	0.98597	3.4761	3.2604	6.2567
	7.5	3.099	-3.073	6.172	0.31726	-0.33717	0.65444	1.0705	1.0899	3.6968	4.0231	5.5403
	7.5	3.5102	-3.4008	6.9111	0.31703	-1.0468	1.3639	0.66643	1.303	3.1228	0.6108	11.7221
	7.5	4.7857	-4.772	9.5577	0.5157	-0.57216	1.0879	0.6215	0.61928	2.8185	2.8601	7.042
	7.5	4.6353	-4.7004	9.3357	0.10022	-0.51629	0.61651	0.66287	0.7119	2.5109	2.7887	5.5286
Mean	-	4.04378	-4.04185	8.08565	0.37626	-0.552252	0.928532	0.722698	0.841035	3.1895	2.77247	7.04298
SD	-	0.690089	0.744513	1.4337	0.172163	0.236409	0.281533	0.228513	0.320703	0.417537	1.0476	2.15364
T11-T12 (n=6)	7.5	3.1202	-3.113	6.2332	0.26475	-0.26888	0.53363	1.6539	1.4522	3.4681	3.4465	6.3491
	7.5	4.9044	-4.9264	9.8307	0.82857	-0.88997	1.7185	0.24462	0.28726	3.3359	3.1944	7.1528
	7.5	3.2388	-3.1918	6.4306	0.27378	-0.23542	0.5092	1.3922	1.6707	2.9432	2.8263	7.224
	7.5	2.3656	-2.2477	4.6133	0.26059	-0.34907	0.60967	2.2009	2.2811	4.1854	3.5079	6.3413
	7.5	2.5784	-2.546	5.1244	0.1871	-0.24942	0.43652	2.0628	2.0159	3.4933	3.296	5.3502
	7.5	3.8276	-3.8499	7.6775	0.39832	-0.41212	0.81044	0.95582	0.91417	3.0816	2.8194	7.0538
Mean	-	3.33917	-3.31247	6.65162	0.368852	-0.400813	0.76966	1.41837	1.43689	3.41792	3.18175	6.57853
SD	-	0.843914	0.882153	1.72579	0.214802	0.227215	0.440093	0.667763	0.670538	0.396321	0.273045	0.657015
