# Supplementary material for: In vitro analysis of the segmental flexibility of the thoracic spine
Source: PLoS One. 2017 May 16;12(5):e0177823. doi: 10.1371/journal.pone.0177823 (PMC5433776; doi:10.1371/journal.pone.0177823)
Supplement: S2 Dataset — The load-displacement raw data of all experiments regarding the segmental levels T1-T2, T2-T3, T3-T4, and T4-T5 including all 3.5 loading cycles are listed. (XLSX) [file pone.0177823.s002.xlsx]

## Sheet: T1-T2
Specimen 1																																	Specimen 2
Lateral bending											Flexion/Extension											Axial rotation											Lateral bending											Flexion/Extension
Time in s	Angle α in °	Angle β in °	Angle γ in °	Moment Mx in Nm	Moment My in Nm	Moment Mz in Nm	Force Fx in N	Force Fy in N	Force Fz in N		Time in s	Angle α in °	Angle β in °	Angle γ in °	Moment Mx in Nm	Moment My in Nm	Moment Mz in Nm	Force Fx in N	Force Fy in N	Force Fz in N		Time in s	Angle α in °	Angle β in °	Angle γ in °	Moment Mx in Nm	Moment My in Nm	Moment Mz in Nm	Force Fx in N	Force Fy in N	Force Fz in N		Time in s	Angle α in °	Angle β in °	Angle γ in °	Moment Mx in Nm	Moment My in Nm	Moment Mz in Nm	Force Fx in N	Force Fy in N	Force Fz in N		Time in s	Angle α in °	Angle β in °	Angle γ in °	Moment Mx in Nm	Moment My in Nm
1.203	2.6862	4.9005	0.1769	0.2309	0.3426	-0.0421	-1.38	5.1829	-23.7425		1.219	-0.0096	1.1707	0.3393	-0.0588	-0.2791	-0.0397	-0.7455	5.6958	-24.0147		1.203	-0.6217	3.1921	2.5945	-0.0536	0.1863	0.2082	-1.38	4.7983	-26.1923		1.219	1.3839	1.2881	-0.2326	0.2252	0.1193	0.0308	0.2062	0.3748	-19.1151		1.188	0.2769	1.1968	-0.6095	-0.0184	0.2035
1.203	2.6862	4.9005	0.1769	0.2309	0.3426	-0.0421	-1.38	5.1829	-23.7425		1.219	-0.0227	1.1837	0.3458	-0.0588	-0.2791	-0.0397	-0.7455	5.6958	-24.0147		1.218	-0.6217	3.2051	2.5945	-0.069	0.1915	0.2179	-0.809	4.3495	-26.283		1.219	1.3709	1.275	-0.2326	0.2252	0.1193	0.0308	0.2062	0.3748	-19.1151		1.203	0.3029	1.1968	-0.6095	-0.061	0.1983
1.265	2.6862	4.9005	0.1769	0.2513	0.3563	-0.0251	-0.6186	4.6701	-23.6518		1.281	-0.0096	1.1837	0.3458	-0.0434	-0.2568	-0.0324	-0.238	5.1829	-23.924		1.281	-0.6217	3.2051	2.5945	-0.0707	0.2069	0.2204	-1.1897	4.606	-25.3757		1.281	1.3709	1.275	-0.2326	0.2559	0.1125	0.0235	0.3331	0.1184	-19.5688		1.266	0.2769	1.1968	-0.603	-0.0405	0.2121
1.328	2.6862	4.9005	0.1769	0.2462	0.3409	-0.0324	-1.1897	5.247	-23.2888		1.344	-0.0096	1.1837	0.3393	-0.0485	-0.2757	-0.0421	-1.38	5.6958	-23.7425		1.343	-0.6087	3.2051	2.601	-0.0451	0.1949	0.2179	-0.9359	4.606	-25.8294		1.344	1.3709	1.275	-0.2261	0.2389	0.1125	0.0284	0.1427	0.5672	-19.2966		1.328	0.2899	1.1837	-0.603	-0.0507	0.2224
1.39	2.6862	4.8874	0.1704	0.2343	0.3529	-0.0324	-1.2531	4.7983	-23.2888		1.406	0.0034	1.1837	0.3393	-0.0536	-0.2808	-0.0372	-1.2531	5.4394	-23.3796		1.406	-0.6348	3.2051	2.5945	-0.0519	0.1949	0.2131	-0.8724	4.4136	-25.285		1.406	1.3709	1.275	-0.2456	0.2474	0.1107	0.0138	-0.1111	0.0543	-19.1151		1.391	0.3029	1.1968	-0.6095	-0.0422	0.2172
1.453	2.6732	4.8874	0.1704	0.2564	0.3443	-0.0275	-0.9359	5.247	-23.8332		1.469	-0.0096	1.1837	0.3393	-0.0298	-0.2842	-0.047	-1.3166	5.7599	-23.6518		1.468	-0.6348	3.2051	2.5945	-0.0639	0.1794	0.2228	-0.6821	4.606	-25.8294		1.469	1.3709	1.262	-0.2326	0.2542	0.1142	0.0211	0.3331	0.1184	-19.478		1.453	0.2899	1.1968	-0.6095	-0.0593	0.2035
1.515	2.6992	4.9005	0.1704	0.2479	0.3563	-0.0348	-1.1897	4.8624	-23.561		1.531	-0.0357	1.1837	0.3393	-0.0315	-0.2825	-0.0202	-0.4283	5.6317	-22.9259		1.531	-0.6217	3.2051	2.601	-0.0366	0.1932	0.2131	-0.9359	4.4777	-26.0108		1.531	1.3839	1.275	-0.2326	0.2542	0.121	0.0187	0.2062	0.1184	-19.841		1.516	0.2899	1.1968	-0.616	-0.0354	0.2172
1.578	2.6732	4.9005	0.1704	0.2343	0.3495	-0.0227	-0.3014	5.1188	-23.2888		1.594	-0.0096	1.1576	0.3393	-0.0588	-0.2722	-0.03	-0.4917	5.3111	-24.0147		1.593	-0.6217	3.2051	2.588	-0.0502	0.2035	0.2228	-0.9993	4.6701	-25.1942		1.594	1.3709	1.275	-0.2326	0.2525	0.1125	0.0235	0.1427	0.3107	-19.6595		1.578	0.3029	1.1968	-0.6095	-0.0576	0.2052
1.64	2.6862	4.8874	0.1769	0.2428	0.334	-0.0348	-1.5704	5.247	-23.0166		1.656	-0.0227	1.1707	0.3393	-0.0383	-0.2791	-0.03	-0.6186	5.6958	-23.4703		1.656	-0.6348	3.2051	2.601	-0.0502	0.1966	0.2252	-0.5552	4.3495	-26.4645		1.656	1.3709	1.275	-0.2326	0.244	0.121	0.0308	0.0793	0.2466	-19.478		1.641	0.3029	1.1968	-0.6095	-0.0422	0.2069
1.703	2.6862	4.9005	0.1769	0.2462	0.3409	-0.03	-1.0628	5.1188	-22.8352		1.719	-0.0227	1.1837	0.3393	-0.057	-0.2774	-0.03	-0.238	5.3111	-24.1054		1.718	-0.6217	3.2051	2.601	-0.0622	0.1846	0.2155	-0.6186	4.9265	-26.3738		1.719	1.3709	1.275	-0.2261	0.2457	0.1056	0.0114	-0.1111	-0.0739	-19.5688		1.703	0.2899	1.1837	-0.6095	-0.0269	0.2121
1.765	2.6732	4.9005	0.1769	0.2632	0.3409	-0.0227	-1.0628	4.8624	-23.3796		1.781	-0.0227	1.1707	0.3523	-0.0417	-0.2791	-0.047	-1.0628	5.5035	-23.1074		1.781	-0.6217	3.2051	2.5945	-0.057	0.1966	0.2204	-0.8724	4.1572	-26.0108		1.781	1.3709	1.262	-0.2326	0.2355	0.1125	0.0235	-0.0476	0.503	-19.0244		1.766	0.3029	1.1968	-0.6095	-0.0235	0.2086
1.828	2.6862	4.9005	0.1704	0.2462	0.3374	-0.0251	-0.6186	5.0547	-23.561		1.844	-0.0227	1.1707	0.3458	-0.0434	-0.2945	-0.0445	-0.809	4.9906	-23.6518		1.843	-0.6087	3.2051	2.601	-0.0707	0.2241	0.2252	-0.238	4.4136	-25.9201		1.844	1.3839	1.275	-0.2261	0.2474	0.1245	0.0308	0.2062	0.2466	-19.2966		1.828	0.2769	1.1968	-0.616	-0.0303	0.2327
1.89	2.6732	4.8874	0.1704	0.2343	0.346	-0.0154	-0.3014	5.1188	-23.1981		1.906	-0.0096	1.1707	0.3523	-0.023	-0.2945	-0.0445	-1.1262	5.0547	-23.7425		1.906	-0.6217	3.2182	2.601	-0.0656	0.1983	0.2228	-0.6186	4.4136	-25.6479		1.906	1.3709	1.262	-0.2326	0.244	0.121	0.0308	0.46	0.3748	-19.7502		1.891	0.2899	1.1968	-0.6095	-0.049	0.2207
1.953	2.6862	4.9005	0.1769	0.2445	0.3529	-0.0348	-1.1262	5.1829	-23.561		1.969	-0.0227	1.1837	0.3458	-0.0485	-0.2791	-0.0227	-0.5552	5.3753	-23.8332		1.968	-0.6217	3.2182	2.601	-0.0468	0.1932	0.2131	-0.4917	4.7983	-25.8294		1.969	1.3709	1.275	-0.2326	0.2269	0.1176	0.0284	0.3331	0.503	-19.1151		1.953	0.3029	1.1968	-0.603	-0.0559	0.1863
2.015	2.6862	4.9005	0.1704	0.2598	0.3374	-0.0348	-0.9359	4.7342	-23.3796		2.031	-0.0096	1.1837	0.3393	-0.0519	-0.2654	-0.0397	-0.9359	5.247	-23.3796		2.031	-0.6217	3.2051	2.601	-0.0553	0.1846	0.2131	-1.2531	4.7983	-25.3757		2.031	1.3709	1.275	-0.2326	0.2423	0.1159	0.0332	0.2696	0.4389	-19.5688		2.016	0.3029	1.1968	-0.616	-0.0269	0.2121
2.078	2.6732	4.9005	0.1769	0.2445	0.3426	-0.0372	-0.9993	5.0547	-23.1074		2.094	0.0034	1.1837	0.3393	-0.0366	-0.2842	-0.0421	-1.4435	5.8881	-23.8332		2.093	-0.6348	3.2051	2.5945	-0.0656	0.1983	0.2155	-0.7455	4.5419	-25.8294		2.094	1.3709	1.275	-0.2326	0.244	0.1245	0.0259	0.3331	0.2466	-19.5688		2.078	0.2899	1.1837	-0.6095	-0.0593	0.2138
2.14	2.6732	4.8874	0.1704	0.2649	0.3357	-0.0251	-0.7455	5.3111	-23.6518		2.156	-0.0096	1.1837	0.3393	-0.0468	-0.2877	-0.0348	-0.1111	5.5676	-23.4703		2.156	-0.6217	3.1921	2.601	-0.0673	0.1794	0.2179	-0.809	4.7342	-25.8294		2.156	1.3709	1.262	-0.2326	0.2508	0.121	0.0284	0.3965	0.0543	-19.478		2.141	0.3029	1.1968	-0.6095	-0.0388	0.2172
2.203	2.6732	4.8874	0.1769	0.2581	0.3426	-0.03	-1.0628	5.1188	-23.561		2.219	-0.0096	1.1576	0.3328	-0.0366	-0.3014	-0.0518	-0.9993	5.1829	-23.4703		2.218	-0.6217	3.2051	2.601	-0.0519	0.188	0.2155	-1.6973	4.606	-25.7386		2.219	1.3709	1.262	-0.2261	0.244	0.1245	0.0235	0.3965	0.0543	-19.6595		2.203	0.2899	1.1968	-0.616	-0.0644	0.1915
2.265	2.6732	4.9005	0.1769	0.2343	0.3529	-0.0154	-0.809	5.247	-23.561		2.281	-0.0096	1.1968	0.3393	-0.0298	-0.2842	-0.03	-0.3014	5.247	-23.2888		2.281	-0.6087	3.2051	2.5945	-0.0588	0.1983	0.2106	-0.4917	4.4136	-25.4664		2.281	1.3709	1.275	-0.2261	0.2423	0.1056	0.0138	-0.238	0.1825	-18.8429		2.266	0.3029	1.1837	-0.6095	-0.0661	0.1932
2.328	2.6862	4.9005	0.1704	0.2717	0.3495	-0.0154	-0.6186	4.5419	-23.0166		2.344	0.0034	1.1837	0.3458	-0.0485	-0.2894	-0.0372	-1.1262	5.5676	-23.3796		2.343	-0.6348	3.2051	2.601	-0.069	0.1949	0.2228	-0.9993	4.6701	-25.6479		2.344	1.3709	1.262	-0.2326	0.2525	0.1262	0.0211	0.0158	0.6954	-19.9317		2.328	0.2899	1.1837	-0.603	-0.0542	0.2155
2.39	2.6732	4.9005	0.1769	0.2649	0.3426	-0.0445	-1.2531	4.5419	-23.7425		2.406	0.0034	1.1837	0.3328	-0.0434	-0.2636	-0.0348	-0.6186	5.1829	-24.1054		2.406	-0.6087	3.2051	2.601	-0.0588	0.1915	0.2228	-0.7455	4.6701	-25.7386		2.406	1.3839	1.262	-0.2326	0.2406	0.1314	0.0308	0.0793	0.1184	-19.2966		2.391	0.2899	1.1968	-0.616	-0.0388	0.1966
2.453	2.6732	4.9135	0.1769	0.2428	0.3512	-0.0445	-1.9511	4.8624	-23.924		2.469	-0.0227	1.1837	0.3458	-0.0332	-0.2877	-0.0372	-0.809	5.247	-22.8352		2.468	-0.6348	3.1921	2.5555	-0.1286	0.1829	0.2179	-1.0628	5.1188	-25.285		2.469	1.3839	1.2489	-0.2196	0.2525	0.1159	0.0138	-0.3014	-0.138	-19.7502		2.453	0.2899	1.1968	-0.6095	-0.0303	0.2052
2.515	2.6732	4.8874	0.1704	0.236	0.3271	-0.0251	-1.0628	4.606	-23.4703		2.531	-0.0227	1.2098	0.3393	-0.0417	-0.1348	-0.0275	1.2848	5.4394	-22.3815		2.531	-0.6217	3.2051	2.575	-0.0979	0.2241	0.2277	-0.9359	4.9906	-24.922		2.531	1.3839	1.262	-0.2391	0.3445	0.1331	0.0065	-0.1111	-0.3304	-19.478		2.516	0.3029	1.2098	-0.6225	-0.049	0.4576
2.578	2.6992	4.9005	0.1314	0.4949	0.3546	-0.0445	-1.2531	2.3622	-23.1074		2.594	-0.0227	1.2881	0.3198	-0.0247	0.0369	-0.0324	2.2366	5.3753	-21.9278		2.593	-0.6087	3.2051	2.588	-0.0519	0.1983	0.2422	-0.4917	4.6701	-25.0128		2.594	1.4229	1.2881	-0.2911	0.5625	0.1159	0.0187	1.3483	-2.1895	-20.7483		2.578	0.2899	1.275	-0.616	-0.0525	0.5744
2.64	2.7644	4.9135	0.1249	0.546	0.334	-0.0324	-0.7455	2.7468	-23.1074		2.656	-0.0227	1.3402	0.3133	-0.0281	-0.0146	-0.0494	0.9676	5.3753	-22.4722		2.656	-0.6217	3.2051	2.6204	-0.086	0.1983	0.2228	-0.8724	4.2854	-25.9201		2.656	1.462	1.275	-0.2716	0.5046	0.1434	0.0138	0.6503	-0.715	-20.1132		2.641	0.2899	1.3663	-0.616	-0.0286	0.3134
2.703	2.8555	4.8614	0.1119	0.575	0.2602	-0.0372	-1.0628	3.3238	-23.8332		2.719	-0.0227	1.4446	0.3198	-0.0673	-0.0644	-0.0397	0.0158	6.0804	-21.8371		2.718	-0.6087	3.2051	2.6594	-0.0673	0.2	0.2811	-0.3014	4.9906	-25.6479		2.719	1.5662	1.275	-0.2586	0.3462	0.0936	0.0089	-0.0476	0.7595	-21.5649		2.703	0.2899	1.4446	-0.6095	-0.0388	0.2378
2.765	2.9076	4.8744	0.1314	0.5545	0.267	-0.0445	-0.7455	5.0547	-23.4703		2.781	-0.0227	1.5098	0.3263	-0.0332	-0.0953	-0.0348	-0.5552	5.3753	-21.7464		2.781	-0.6087	3.2051	2.7049	-0.0622	0.1846	0.2957	-0.7455	4.1572	-25.1035		2.781	1.6574	1.275	-0.1741	0.4092	0.0678	-0.0057	0.1427	0.9518	-20.5668		2.766	0.2899	1.5358	-0.5965	0.0038	0.2773
2.828	2.9988	4.8614	0.1314	0.7045	0.2086	-0.0227	-0.809	4.9906	-24.5591		2.844	-0.0227	1.588	0.3263	-0.0434	-0.0369	-0.047	-1.4435	5.7599	-21.3834		2.843	-0.6217	3.1921	2.7439	-0.0945	0.1657	0.2981	-1.3166	4.4777	-24.922		2.844	1.7485	1.275	-0.1546	0.4637	0.1159	0.0162	-0.238	0.0543	-21.0205		2.828	0.2899	1.601	-0.603	-0.0269	0.4216
2.89	3.0639	4.8744	0.1249	0.8578	0.2121	-0.0421	-0.8724	2.7468	-23.7425		2.906	-0.0227	1.6793	0.3263	-0.0502	0.1004	-0.0421	0.2062	5.6317	-21.8371		2.906	-0.6217	3.2051	2.7894	-0.0741	0.1794	0.3249	-1.1262	4.1572	-24.2869		2.906	1.8137	1.262	-0.1741	0.6733	0.1382	0.0041	1.0945	-0.6509	-22.0186		2.891	0.2899	1.6663	-0.59	-0.0422	0.5847
2.953	3.142	4.9005	0.0729	1.0281	0.2327	-0.0397	-0.809	2.0416	-24.922		2.969	-0.0096	1.7445	0.3133	-0.0366	0.1966	-0.0348	1.031	5.4394	-20.839		2.968	-0.6087	3.2182	2.8154	-0.0894	0.1743	0.3395	-1.2531	4.4136	-24.3776		2.969	1.8788	1.2489	-0.1936	0.7806	0.0987	-0.0129	1.031	-2.2536	-22.4722		2.953	0.2899	1.7706	-0.5965	-0.0388	0.6397
3.015	3.1941	4.8744	0.0469	1.1491	0.1623	-0.0275	-0.6186	1.7211	-25.5572		3.031	-0.0096	1.8358	0.3003	-0.0434	0.1966	-0.03	1.2848	5.5676	-21.1112		3.031	-0.6087	3.1921	2.8609	-0.0775	0.1691	0.3686	-0.9359	4.606	-24.3776		3.031	1.9309	1.262	-0.1871	0.784	0.1228	-0.0032	0.0158	-1.0997	-21.6556		3.016	0.3029	1.8358	-0.5835	-0.0439	0.5933
3.078	3.2853	4.8744	0.0339	1.1763	0.1623	-0.0275	-0.4283	3.0674	-24.8313		3.094	-0.0227	1.888	0.2938	-0.0298	0.2103	-0.0348	0.9676	5.5035	-21.202		3.093	-0.6217	3.2051	2.8934	-0.086	0.1743	0.4099	-0.6821	4.606	-24.1962		3.094	2.0351	1.262	-0.1741	0.7176	0.0661	0.0041	0.9676	-0.2663	-22.563		3.078	0.2899	1.9271	-0.59	-0.0235	0.4422
3.14	3.3634	4.8744	0.0339	1.2053	0.109	-0.03	-0.9359	3.1956	-26.0108		3.156	0.0034	1.9923	0.2938	-0.0468	0.1623	-0.0518	-0.6821	4.8624	-20.7483		3.156	-0.6217	3.2051	2.9389	-0.0894	0.1846	0.4245	-0.6186	4.6701	-24.1962		3.156	2.1262	1.275	-0.1221	0.721	0.1176	0.0041	0.0793	0.3748	-23.1074		3.141	0.2899	2.0184	-0.577	-0.0388	0.4783
3.203	3.4676	4.8744	0.0209	1.3211	0.0815	-0.047	-0.5552	3.7084	-25.3757		3.219	-0.0227	2.0575	0.2938	-0.0383	0.2155	-0.0275	-0.0476	4.9906	-21.1112		3.218	-0.6217	3.2051	2.9714	-0.0962	0.1571	0.4415	-0.6186	5.0547	-23.7425		3.219	2.2044	1.275	-0.1156	0.8419	0.1193	0.0187	0.5869	0.2466	-23.4703		3.203	0.2899	2.0836	-0.577	-0.0201	0.6792
3.265	3.5328	4.8614	-0.0051	1.4268	0.097	-0.0227	0.3331	3.452	-25.6479		3.281	-0.0227	2.1488	0.2873	-0.0145	0.3306	-0.0275	0.0158	5.4394	-21.1112		3.281	-0.6087	3.2051	3.0104	-0.1201	0.1228	0.4731	-0.9993	4.9265	-24.1054		3.281	2.2695	1.3011	-0.1026	0.939	0.0867	0.0162	1.4117	-0.5868	-23.6518		3.266	0.2899	2.1618	-0.5835	-0.0473	0.82
3.328	3.5979	4.8614	-0.0311	1.5784	0.0111	-0.0445	-0.9359	2.8109	-26.1016		3.344	-0.0096	2.227	0.2743	-0.0536	0.3203	-0.0397	1.031	5.6958	-20.6576		3.343	-0.6348	3.2051	3.0559	-0.0775	0.1417	0.5072	-0.9993	5.0547	-23.2888		3.344	2.3346	1.275	-0.1286	1.1026	0.1176	0.0138	0.7138	-1.292	-23.1074		3.328	0.2639	2.227	-0.5835	-0.0456	0.8148
3.39	3.676	4.8614	-0.0571	1.7113	0.0558	-0.0494	-0.9359	2.0416	-25.4664		3.406	-0.0227	2.3183	0.2938	-0.0383	0.3357	-0.0372	0.0158	5.5676	-20.7483		3.406	-0.6217	3.2182	3.0819	-0.0911	0.1279	0.5339	-1.0628	4.7342	-23.7425		3.406	2.4127	1.2881	-0.1351	1.1724	0.109	-0.0057	0.5869	-1.9331	-24.5591		3.391	0.2899	2.3053	-0.5705	-0.0456	0.7187
3.453	3.7932	4.8483	-0.0896	1.7981	0.0026	-0.0275	-0.3648	1.9775	-26.7367		3.469	-0.0096	2.4096	0.2743	-0.0417	0.3357	-0.0251	-0.0476	5.5035	-20.7483		3.468	-0.6348	3.2182	3.1209	-0.1048	0.121	0.5679	-1.3166	4.606	-22.9259		3.469	2.4778	1.2881	-0.1286	1.1452	0.1365	-0.0129	0.3331	-0.3945	-24.3776		3.453	0.2899	2.4226	-0.5705	-0.0235	0.6277
3.515	3.8193	4.8614	-0.0961	1.9361	-0.0335	-0.03	-0.5552	2.5545	-27.2811		3.531	-0.0096	2.4879	0.2678	-0.0179	0.3357	-0.0251	0.1427	5.1829	-21.6556		3.531	-0.6217	3.2051	3.1599	-0.0979	0.1107	0.6019	-0.5552	5.3753	-23.0166		3.531	2.569	1.3011	-0.1091	1.1673	0.121	0.0016	0.2062	-0.0098	-23.924		3.516	0.2899	2.5009	-0.564	-0.0456	0.7187
3.578	3.8844	4.8614	-0.1091	2.0349	-0.0438	-0.0445	-0.3014	2.8109	-27.1904		3.594	-0.0357	2.54	0.2613	-0.0349	0.3426	-0.0227	-0.0476	6.1446	-21.2927		3.593	-0.6087	3.2051	3.1989	-0.0724	0.1022	0.6408	-0.809	4.7342	-23.4703		3.594	2.6341	1.2881	-0.0896	1.1826	0.1193	-0.0178	0.8407	-0.138	-25.6479		3.578	0.2769	2.5531	-0.564	-0.0456	0.8629
3.64	3.9625	4.8744	-0.1416	2.1661	-0.0387	-0.0275	-0.1745	2.5545	-27.2811		3.656	-0.0227	2.6443	0.2678	-0.0366	0.4096	-0.0324	-0.1111	5.6958	-20.839		3.656	-0.6217	3.2051	3.2378	-0.1065	0.109	0.67	-0.9993	4.7983	-23.1981		3.656	2.7383	1.2881	-0.0896	1.3769	0.1365	-0.0032	0.0793	-0.3945	-25.285		3.641	0.2899	2.6443	-0.564	-0.0099	0.9746
3.703	4.0276	4.8614	-0.1611	2.3126	-0.073	-0.0518	-0.4917	1.9775	-26.4645		3.719	-0.0227	2.7096	0.2613	-0.0366	0.4439	-0.0324	1.4752	5.247	-21.7464		3.718	-0.6348	3.2051	3.2768	-0.0707	0.097	0.7235	-0.1111	4.9265	-23.561		3.719	2.8034	1.3011	-0.0766	1.52	0.0953	0.0114	0.7138	-1.5484	-25.5572		3.703	0.2899	2.7356	-0.564	-0.0473	1.0055
3.765	4.1058	4.8614	-0.1936	2.437	-0.0369	-0.0397	-0.4917	1.9775	-26.3738		3.781	-0.0096	2.8008	0.2484	-0.0519	0.4319	-0.0348	0.46	5.3753	-21.9278		3.781	-0.6087	3.2051	3.3093	-0.086	0.0712	0.7405	-0.6821	4.8624	-22.8352		3.781	2.8816	1.3011	-0.0831	1.5864	0.0901	-0.0129	0.8407	-1.6766	-26.9182		3.766	0.2769	2.8008	-0.5575	-0.0473	1.0123
3.828	4.1969	4.8614	-0.2196	2.5903	-0.0953	-0.03	0.0158	2.1057	-27.2811		3.844	-0.0096	2.8791	0.2484	-0.0417	0.4559	-0.0445	0.9041	5.3111	-21.0205		3.843	-0.6217	3.2182	3.3483	-0.103	0.0747	0.7964	-0.6186	4.5419	-23.1074		3.844	2.9467	1.3011	-0.0896	1.6324	0.1296	-0.0008	0.5234	-1.7407	-25.3757		3.828	0.2639	2.8791	-0.5575	-0.0388	0.9866
3.89	4.2621	4.8614	-0.2391	2.7624	-0.1039	-0.0445	-0.238	2.1057	-27.5533		3.906	-0.0096	2.9834	0.2354	-0.0502	0.4645	-0.0397	0.3965	5.4394	-21.0205		3.906	-0.6217	3.2051	3.3938	-0.086	0.0678	0.845	-0.4917	4.5419	-22.7444		3.906	3.0118	1.3011	-0.0831	1.6614	0.097	0.0065	0.46	-0.3945	-26.0108		3.891	0.2769	2.9704	-0.551	-0.0252	1.0793
3.953	4.3402	4.8744	-0.2716	2.8595	-0.0644	-0.0202	0.2696	2.4904	-27.644		3.969	-0.0096	3.0486	0.2354	-0.0434	0.4645	-0.0494	-0.1745	5.6317	-20.2946		3.968	-0.6217	3.2051	3.4263	-0.0826	0.0815	0.8887	-0.8724	4.7983	-22.563		3.969	3.103	1.2881	-0.0701	1.7397	0.0867	-0.0081	0.46	-0.6509	-25.8294		3.953	0.3029	3.0617	-0.5445	-0.0286	1.1961
4.015	4.4314	4.8614	-0.2911	3.023	-0.0747	-0.0372	-0.1111	2.3622	-28.0977		4.031	-0.0227	3.1399	0.2224	-0.0588	0.4971	-0.0178	0.7772	5.6958	-21.0205		4.031	-0.6348	3.2051	3.4588	-0.1065	0.0575	0.9373	-0.7455	5.0547	-21.7464		4.031	3.1941	1.3011	-0.0766	1.8402	0.0987	0.0284	0.6503	-1.2279	-25.5572		4.016	0.2899	3.1399	-0.551	-0.0797	1.2614
4.078	4.5095	4.8874	-0.3236	3.224	-0.1159	-0.047	-0.1745	1.5288	-28.5514		4.094	-0.0096	3.2182	0.2224	-0.0605	0.5195	-0.0445	0.9041	5.824	-21.5649		4.093	-0.6478	3.2051	3.4978	-0.1048	0.0661	0.9738	-0.7455	4.7983	-21.5649		4.094	3.2593	1.2881	-0.0701	1.9987	0.0867	-0.0057	0.9041	-1.9972	-26.8274		4.078	0.2899	3.2051	-0.551	-0.032	1.2923
4.14	4.5877	4.8874	-0.356	3.3876	-0.0507	-0.0251	0.7772	1.8493	-27.9162		4.156	-0.0096	3.2964	0.2159	-0.0349	0.4903	-0.03	0.3965	5.4394	-21.9278		4.156	-0.6217	3.2051	3.5368	-0.0962	0.0094	1.0321	-0.809	4.8624	-22.563		4.156	3.3244	1.2881	-0.0766	2.0702	0.0901	-0.0154	0.8407	-1.1638	-25.285		4.141	0.2899	3.2834	-0.5445	-0.049	1.3232
4.203	4.6658	4.8614	-0.369	3.5017	-0.1211	-0.0372	0.2062	2.1699	-28.6421		4.219	-0.0096	3.3747	0.2094	-0.04	0.5092	-0.0372	1.031	5.3111	-23.0166		4.218	-0.6348	3.2051	3.5823	-0.0979	0.0146	1.0832	-1.2531	5.3111	-22.0186		4.219	3.4155	1.3011	-0.0701	2.0804	0.1245	-0.0032	0.7772	-1.0997	-26.3738		4.203	0.2899	3.3747	-0.5445	-0.032	1.3678
4.265	4.7309	4.8614	-0.408	3.6585	-0.0661	-0.0348	1.2848	1.3365	-29.2773		4.281	-0.0096	3.4529	0.2094	-0.0366	0.5469	-0.0154	1.0945	4.8624	-21.5649		4.281	-0.6478	3.2182	3.6083	-0.086	-0.0215	1.1366	-0.8724	5.6958	-21.2927		4.281	3.4937	1.2881	-0.0571	2.1452	0.1176	0.0405	0.7138	-0.9073	-26.8274		4.266	0.2899	3.4529	-0.5445	-0.0661	1.4434
4.328	4.8091	4.8744	-0.4275	3.7964	-0.0782	-0.0275	1.3483	1.9134	-29.7309		4.344	-0.0096	3.5442	0.1899	-0.0605	0.5607	-0.0057	0.5234	4.5419	-22.2		4.343	-0.6478	3.1921	3.6603	-0.0826	-0.0043	1.1804	-0.5552	4.9906	-23.0166		4.344	3.5718	1.3011	-0.0571	2.3326	0.1417	0.0162	0.2062	-1.0355	-26.5552		4.328	0.2769	3.5181	-0.538	-0.0269	1.5275
4.39	4.8872	4.8614	-0.447	3.9617	-0.128	-0.03	1.1579	1.3365	-29.1865		4.406	-0.0227	3.6224	0.1899	-0.0383	0.559	-0.0372	0.7772	5.1829	-21.8371		4.406	-0.6608	3.2051	3.6928	-0.0911	-0.006	1.2411	-0.4283	4.8624	-22.2908		4.406	3.65	1.275	-0.0571	2.4586	0.1417	0.0041	-0.238	-1.7407	-26.1016		4.391	0.2769	3.6224	-0.5445	-0.0371	1.6271
4.453	4.9523	4.8614	-0.4795	4.1457	-0.0764	-0.0445	0.7772	0.6954	-29.0958		4.469	-0.0096	3.7007	0.1899	-0.0519	0.5693	-0.0421	1.1579	5.6958	-22.8352		4.468	-0.6738	3.1921	3.7383	-0.0996	-0.0387	1.3043	-0.7455	4.7983	-21.6556		4.469	3.689	1.275	-0.0571	2.5864	0.0987	0.0114	1.0945	-2.5741	-27.7348		4.453	0.2899	3.6876	-0.538	-0.0576	1.6787
4.515	5.0305	4.8744	-0.512	4.3467	-0.0833	-0.0664	1.1579	1.2082	-30.0939		4.531	-0.0096	3.7789	0.1704	-0.0383	0.5521	-0.03	0.0158	4.5419	-23.1074		4.531	-0.6999	3.2051	3.7708	-0.0911	-0.0301	1.3602	-0.4917	5.5676	-21.8371		4.531	3.7672	1.2489	-0.0506	2.6801	0.1451	-0.0057	-0.238	-1.4843	-27.0996		4.516	0.2899	3.7529	-0.5445	-0.0405	1.6924
4.578	5.0956	4.8744	-0.5315	4.4745	-0.1469	-0.0348	1.031	1.7211	-29.8217		4.594	-0.0096	3.8572	0.1704	-0.0247	0.5624	-0.0397	0.5234	5.824	-23.1981		4.593	-0.6999	3.2051	3.8097	-0.1116	-0.0576	1.438	-0.3014	5.8881	-21.7464		4.594	3.8583	1.262	-0.0636	2.7329	0.1262	0.0089	0.1427	-1.6125	-27.0089		4.578	0.3029	3.8441	-0.525	-0.0712	1.7886
4.64	5.1737	4.8483	-0.564	4.638	-0.0782	-0.0397	0.9676	1.0159	-29.8217		4.656	0.0034	3.9615	0.1704	-0.0349	0.5555	-0.03	-0.0476	5.247	-23.3796		4.656	-0.7129	3.2051	3.8487	-0.0996	-0.0593	1.4744	-0.6186	4.7983	-21.5649		4.656	3.9365	1.2359	-0.0571	2.8624	0.109	-0.0008	0.5234	-1.869	-28.0977		4.641	0.316	3.9354	-0.525	-0.0559	1.8968
4.703	5.2388	4.8744	-0.5835	4.8254	-0.0885	-0.0445	1.031	1.08	-30.5475		4.719	-0.0096	4.0137	0.1574	-0.0332	0.5882	-0.047	0.7138	5.6317	-23.6518		4.718	-0.7259	3.2182	3.8747	-0.0962	-0.0078	1.5474	-0.5552	5.1188	-22.1093		4.719	4.0016	1.1968	-0.0441	2.951	0.1949	-0.0008	0.0158	-1.7407	-26.8274		4.703	0.3029	4.0006	-0.525	-0.0473	2.0187
4.765	5.33	4.8744	-0.616	5.0281	-0.1177	-0.0251	0.8407	0.3748	-31.9085		4.781	-0.0096	4.105	0.1509	-0.04	0.5676	-0.047	0.46	5.247	-24.4684		4.781	-0.6999	3.2051	3.9072	-0.086	-0.0318	1.5935	-0.4917	5.3111	-21.3834		4.781	4.0928	1.1968	-0.0506	3.0395	0.0884	-0.0008	0.46	-1.6766	-27.1904		4.766	0.2899	4.0789	-0.525	-0.0422	2.0719
4.828	5.4081	4.9005	-0.642	5.2326	-0.0387	-0.0421	1.729	0.503	-31.9085		4.844	0.0034	4.2093	0.1444	-0.0366	0.6088	-0.03	1.031	5.3111	-23.7425		4.843	-0.7129	3.2312	3.9332	-0.0945	-0.0129	1.6591	0.0793	4.9906	-21.2927		4.844	4.1579	1.1707	-0.0441	3.1912	0.1623	0.0138	1.1579	-2.2536	-26.8274		4.828	0.2899	4.1702	-0.5185	-0.015	2.1578
4.89	5.4602	4.8874	-0.6615	5.3927	-0.073	-0.0372	1.7924	0.6954	-31.4549		4.906	-0.0096	4.2745	0.1314	-0.0468	0.5779	-0.0251	0.5234	4.7983	-24.922		4.906	-0.739	3.2442	3.9722	-0.0962	-0.0215	1.6883	-0.4283	5.247	-22.2		4.906	4.223	1.1446	-0.0441	3.3598	0.1777	0.0065	0.6503	-2.3818	-26.9182		4.891	0.3029	4.2354	-0.5185	-0.0201	2.1939
4.953	5.5384	4.9005	-0.694	5.4847	-0.1005	-0.0445	1.2214	0.7595	-31.9993		4.969	0.0034	4.3397	0.1184	-0.0196	0.6156	-0.0372	0.5869	5.3753	-24.1962		4.968	-0.765	3.2703	4.0112	-0.1133	-0.0181	1.7442	0.0793	5.7599	-21.9278		4.969	4.3272	1.1055	-0.0376	3.4007	0.0747	0.0041	0.8407	-1.4202	-27.9162		4.953	0.2899	4.3136	-0.5185	-0.0542	2.3141
5.015	5.6165	4.8874	-0.7005	5.6908	-0.061	-0.0616	1.1579	0.8236	-31.6363		5.031	-0.0096	4.431	0.1184	-0.0281	0.6242	-0.0324	0.5234	5.3111	-25.285		5.031	-0.765	3.2834	4.0437	-0.0928	-0.0284	1.7928	0.0793	5.5035	-22.0186		5.031	4.4053	1.0533	-0.0441	3.4825	0.1537	0.0016	0.6503	-1.3561	-27.8255		5.016	0.3029	4.3919	-0.5185	-0.0337	2.448
5.078	5.6816	4.9005	-0.733	5.9515	-0.1108	-0.0324	1.4117	0.1825	-31.9993		5.094	0.0034	4.5092	0.1119	-0.04	0.6672	-0.0348	1.2214	5.3753	-25.1035		5.093	-0.778	3.3095	4.0827	-0.0979	-0.0198	1.8439	0.3965	5.3111	-22.2908		5.094	4.4835	1.0272	-0.0441	3.5677	0.0815	-0.0032	0.7772	-1.2279	-27.9162		5.078	0.2899	4.4701	-0.5185	-0.0422	2.57
5.14	5.7467	4.9135	-0.7655	6.1167	-0.085	-0.047	1.2214	0.1184	-31.3641		5.156	0.0034	4.6005	0.0989	-0.0451	0.6345	-0.0397	0.5869	5.3753	-25.8294		5.156	-0.8171	3.3355	4.1217	-0.1013	-0.0266	1.9022	0.0793	4.9906	-21.9278		5.156	4.5616	1.0272	-0.0571	3.7074	0.1365	-0.0105	0.3965	-1.9972	-26.7367		5.141	0.2899	4.5745	-0.512	-0.0354	2.6833
5.203	5.8249	4.9005	-0.7785	6.316	-0.0387	-0.0518	0.8407	0.7595	-32.1807		5.219	0.0034	4.6657	0.0859	-0.0502	0.65	-0.0372	0.3331	4.9906	-25.6479		5.218	-0.8692	3.3355	4.1802	-0.1593	-0.0129	1.9362	-0.0476	5.5035	-22.0186		5.219	4.6397	1.0142	-0.0441	3.9305	0.1657	-0.0154	-0.1745	-3.087	-27.0996		5.203	0.2899	4.6397	-0.499	-0.0337	2.7606
5.265	5.903	4.9266	-0.8045	6.4353	-0.0593	-0.0567	1.031	0.6954	-32.09		5.281	0.0034	4.7701	0.0859	-0.0656	0.6483	-0.047	1.2848	5.0547	-25.4664		5.281	-0.8952	3.3747	4.2062	-0.1593	-0.0095	1.9945	-0.1111	5.4394	-22.2		5.281	4.7309	1.0142	-0.0571	3.9953	0.0833	-0.0057	0.2696	-2.3818	-27.3718		5.266	0.316	4.7049	-0.499	-0.0507	2.8911
5.328	6.0072	4.9135	-0.8305	6.6482	-0.0369	-0.0324	1.5386	0.6954	-32.9066		5.344	-0.0096	4.8353	0.0729	-0.069	0.6517	-0.0324	1.4117	5.0547	-25.6479		5.343	-0.9083	3.3877	4.2452	-0.1473	-0.0215	2.048	-0.0476	3.9649	-22.563		5.344	4.77	1.0011	-0.0506	4.0992	0.1708	0.0211	-0.8724	-2.8947	-28.0977		5.328	0.3029	4.7701	-0.499	-0.049	2.9959
5.39	6.0463	4.9266	-0.85	6.8714	-0.0455	-0.0397	1.2848	0.1825	-32.2715		5.406	-0.0096	4.9396	0.0664	-0.0468	0.6809	-0.0397	0.5234	4.7983	-26.646		5.406	-0.9083	3.4138	4.2842	-0.1661	-0.0232	2.1112	0.0158	4.9265	-23.1981		5.406	4.8742	1.0011	-0.0636	4.2321	0.1331	0.0187	0.5869	-2.0613	-27.7348		5.391	0.316	4.8483	-0.4925	-0.0439	3.1899
5.453	6.0984	4.9135	-0.8695	7.0009	-0.0661	-0.0275	0.9676	-0.0098	-31.3641		5.469	-0.0096	5.0179	0.0534	-0.0519	0.7067	-0.0324	1.6655	5.1829	-26.283		5.468	-0.9083	3.4268	4.3297	-0.1235	-0.0318	2.189	0.6503	5.1829	-22.7444		5.469	4.9393	0.9751	-0.0506	4.3309	0.1159	-0.0008	0.3331	-1.9331	-27.1904		5.453	0.2899	4.9266	-0.4925	-0.0388	3.3015
5.515	6.2026	4.9135	-0.8955	7.2206	-0.0095	-0.0518	1.5386	0.5672	-31.7271		5.531	-0.0096	5.0831	0.0404	-0.0502	0.7152	-0.0445	1.6021	5.247	-28.0977		5.531	-0.9343	3.4268	4.3557	-0.1388	-0.0473	2.2424	0.2696	5.5676	-22.7444		5.531	5.0174	0.962	-0.0636	4.4995	0.1623	-0.0081	-0.238	-3.0229	-27.3718		5.516	0.2899	5.0309	-0.4925	-0.0644	3.42
5.578	6.2807	4.9005	-0.9085	7.4847	-0.0971	-0.0324	0.7772	-0.0739	-33.0881		5.594	-0.0096	5.1613	0.0404	-0.0502	0.7118	-0.0324	1.7924	5.0547	-27.1904		5.593	-0.9343	3.4659	4.3947	-0.1371	-0.049	2.3105	-0.1745	6.0163	-22.0186		5.594	5.0825	0.9751	-0.0701	4.6392	0.1451	0.0114	-0.1111	-2.6382	-26.8274		5.578	0.2899	5.0831	-0.486	-0.0388	3.5866
5.64	6.3588	4.9266	-0.9409	7.6976	-0.0576	-0.0397	0.7772	-0.2021	-31.3641		5.656	-0.0096	5.2396	0.0144	-0.04	0.7324	-0.0202	1.8559	5.247	-27.8255		5.656	-0.9343	3.4659	4.4401	-0.1456	-0.0129	2.3688	0.7138	4.8624	-21.7464		5.656	5.1737	0.949	-0.0636	4.7568	0.0987	-0.0081	0.0158	-2.8947	-28.4606		5.641	0.2899	5.1613	-0.4795	-0.0405	3.7429
5.703	6.437	4.9266	-0.9474	7.805	-0.0661	-0.0518	1.4752	0.503	-32.4529		5.719	-0.0096	5.3048	0.0209	-0.0468	0.6775	-0.0275	-0.1111	5.4394	-28.3699		5.718	-0.9473	3.479	4.4791	-0.1422	-0.0335	2.449	0.6503	4.7983	-22.0186		5.719	5.2519	0.949	-0.0636	4.8283	0.2052	-0.0057	-0.1111	-1.9972	-26.9182		5.703	0.3029	5.2396	-0.486	-0.0371	3.8494
5.765	6.463	4.9266	-0.9604	7.5477	-0.0369	-0.0251	1.4117	2.1057	-32.2715		5.781	0.0164	5.3961	0.0079	-0.0315	0.7101	-0.0348	0.9676	4.9906	-29.8217		5.781	-0.9603	3.5051	4.5116	-0.1627	-0.0335	2.5073	0.46	5.3753	-21.7464		5.781	5.317	0.9359	-0.0766	5.0106	0.1623	0.0114	0.0158	-2.7665	-28.0977		5.766	0.3029	5.3178	-0.473	-0.0507	4.0177
5.828	6.463	4.9266	-0.9604	7.1934	-0.1949	-0.0348	-0.4917	3.1315	-30.8197		5.844	-0.0096	5.4743	0.0014	-0.023	0.7049	-0.03	1.6021	4.9906	-29.5495		5.843	-0.9864	3.5181	4.5571	-0.149	-0.0369	2.5681	1.1579	4.9265	-22.4722		5.844	5.3951	0.9229	-0.0766	5.123	0.1279	-0.0154	0.0793	-2.7024	-27.644		5.828	0.2769	5.37	-0.473	-0.0371	4.1894
5.89	6.424	4.9396	-0.9345	6.9225	-0.0284	-0.0324	0.5869	1.0159	-29.1865		5.906	-0.0096	5.5525	-0.0116	-0.0093	0.7805	-0.0445	1.4117	5.0547	-29.8217		5.906	-1.0124	3.5442	4.5896	-0.161	-0.0318	2.6191	0.6503	5.1829	-21.8371		5.906	5.4602	0.9099	-0.0831	5.2423	0.152	0.0187	-0.0476	-2.8306	-26.646		5.891	0.2899	5.4613	-0.473	-0.0559	4.3903
5.953	6.3458	4.9527	-0.9215	6.5614	0.085	-0.0567	0.9041	2.1057	-28.007		5.969	0.0294	5.6308	-0.0246	-0.0417	0.82	-0.0518	1.1579	4.6701	-29.5495		5.968	-0.9994	3.5572	4.6221	-0.1627	0.0008	2.6945	0.46	4.7342	-22.7444		5.969	5.5253	0.8838	-0.0896	5.3683	0.1073	0.0089	0.1427	-3.0229	-27.1904		5.953	0.2899	5.5525	-0.473	-0.0252	4.538
6.015	6.2807	4.9396	-0.902	6.3637	-0.0455	-0.0543	0.2696	0.8236	-27.644		6.031	0.0034	5.7221	-0.0246	-0.0536	0.8183	-0.0445	2.3635	5.1188	-29.8217		6.031	-1.0255	3.5964	4.6741	-0.1763	-0.0163	2.7528	1.031	5.3111	-22.6537		6.031	5.5905	0.8577	-0.0961	5.5404	0.109	0.0138	-0.238	-3.0229	-27.7348		6.016	0.2769	5.6178	-0.4665	-0.0133	4.6668
6.078	6.2156	4.9527	-0.876	6.1031	0.0695	-0.0494	1.1579	1.9775	-28.007		6.094	0.0034	5.7873	-0.0311	-0.04	0.7839	-0.0421	1.2214	4.7342	-30.729		6.093	-1.0776	3.6224	4.7066	-0.1848	0.006	2.799	0.7772	5.3111	-22.7444		6.094	5.6816	0.8447	-0.1026	5.6494	0.2052	-0.0202	-0.3648	-3.0229	-26.1923		6.078	0.2899	5.7221	-0.4665	-0.0184	4.8609
6.14	6.1635	4.9657	-0.85	5.6568	0.0077	-0.0445	0.3965	4.6701	-27.7348		6.156	0.0034	5.8916	-0.0441	-0.0366	0.7874	-0.0445	1.9193	4.9265	-30.729		6.156	-1.0645	3.6616	4.7521	-0.1984	-0.0284	2.8573	0.3965	4.9265	-22.8352		6.156	5.7467	0.8316	-0.1156	5.7925	0.1537	0.0211	0.0158	-2.51	-27.1904		6.141	0.2899	5.7743	-0.46	-0.0133	5.0584
6.203	6.0723	4.9527	-0.824	5.3075	-0.0284	-0.0543	-0.4283	4.4777	-27.7348		6.219	0.0164	5.9829	-0.0506	-0.0451	0.796	-0.047	1.5386	4.7983	-30.2753		6.218	-1.1036	3.6616	4.7911	-0.207	-0.0232	2.9351	0.46	5.3753	-22.8352		6.219	5.8249	0.8186	-0.1221	5.905	0.1502	0.0016	0.2062	-3.2152	-26.4645		6.203	0.2899	5.8525	-0.4665	-0.0371	5.2404
6.265	6.0072	4.9657	-0.8045	5.2428	0.0335	-0.0518	-0.238	2.875	-26.1923		6.281	0.0034	6.0742	-0.0506	-0.0536	0.8389	-0.0251	2.6173	4.8624	-31.6363		6.281	-1.1036	3.6616	4.8236	-0.178	-0.0352	3.008	0.5234	5.0547	-22.2		6.281	5.903	0.8055	-0.1286	6.0907	0.2275	-0.0032	-0.238	-3.2793	-25.8294		6.266	0.3029	5.9438	-0.4535	-0.015	5.4001
6.328	5.9291	4.9527	-0.7785	5.052	0.006	-0.0445	0.3965	2.1057	-26.7367		6.344	0.0164	6.1655	-0.0571	-0.0536	0.8698	-0.0372	2.2366	5.6317	-31.7271		6.343	-1.1166	3.6746	4.8691	-0.1984	-0.0352	3.0688	1.031	5.3111	-22.7444		6.344	5.9812	0.7925	-0.1416	6.2184	0.1159	0.0211	0.0158	-3.0229	-27.2811		6.328	0.2899	6.009	-0.447	0.0004	5.5564
6.39	5.8249	4.9657	-0.759	4.747	0.0249	-0.0567	0.2696	3.7726	-26.4645		6.406	0.0294	6.2177	-0.0636	-0.0349	0.899	-0.03	2.3635	5.247	-31.1827		6.406	-1.1297	3.7007	4.9081	-0.1899	-0.0198	3.1319	0.5869	5.1188	-22.8352		6.406	6.0854	0.7794	-0.1481	6.3343	0.2121	-0.0057	0.0158	-3.0229	-26.9182		6.391	0.3029	6.1003	-0.4535	-0.0133	5.7797
6.453	5.7728	4.9657	-0.733	4.6022	-0.0078	-0.0494	0.3965	4.2854	-26.646		6.469	0.0294	6.3089	-0.0701	-0.0196	0.9145	-0.0421	2.7442	4.9906	-31.7271		6.468	-1.1166	3.7137	4.9536	-0.1916	-0.0352	3.1976	0.3331	4.9906	-22.4722		6.469	6.1374	0.7664	-0.1611	6.4382	0.1314	-0.0202	-0.4917	-3.0229	-26.3738		6.453	0.2899	6.1916	-0.447	-0.0201	5.9651
6.515	5.7207	4.9527	-0.707	4.3484	0.0386	-0.0421	0.0158	4.5419	-26.1923		6.531	0.0034	6.3611	-0.0831	-0.0264	0.9351	-0.0275	2.0462	5.5676	-32.6344		6.531	-1.1166	3.7007	4.9925	-0.1933	-0.0232	3.268	1.2214	5.3753	-22.0186		6.531	6.2286	0.7664	-0.1741	6.5643	0.1932	-0.0154	-0.3648	-3.2793	-27.3718		6.516	0.2769	6.2307	-0.4535	-0.0013	6.1283
6.578	5.6426	4.9657	-0.6745	4.1269	0.0455	-0.0543	0.0158	4.9265	-26.1016		6.594	0.0294	6.4524	-0.0766	-0.0417	0.9093	-0.0397	1.6655	5.6958	-32.2715		6.593	-1.1427	3.7137	5.0445	-0.1984	-0.0352	3.3507	1.2214	5.8881	-22.9259		6.594	6.3068	0.7534	-0.1871	6.7585	0.2103	-0.0129	0.3331	-3.8563	-26.9182		6.578	0.2899	6.3089	-0.4535	-0.0167	6.3189
6.64	5.5514	4.9657	-0.6615	3.9396	0.0352	-0.03	0.3331	3.3238	-26.0108		6.656	0.0034	6.5437	-0.0831	-0.0076	0.9677	-0.0348	1.6021	4.8624	-31.2734		6.656	-1.1297	3.7398	5.077	-0.1933	-0.0232	3.3823	0.8407	5.247	-23.1074		6.656	6.3849	0.7403	-0.1936	6.9339	0.1296	-0.0178	-0.4917	-3.664	-27.2811		6.641	0.2899	6.3872	-0.447	-0.0065	6.4632
6.703	5.4863	4.9657	-0.629	3.7777	0.0369	-0.0397	0.5234	3.3879	-25.1035		6.719	0.0425	6.6219	-0.0766	-0.0485	1.0192	-0.0421	2.2366	4.9906	-32.2715		6.718	-1.1427	3.7789	5.129	-0.1814	-0.0387	3.4673	1.1579	5.824	-22.7444		6.719	6.45	0.7012	-0.2066	7.0413	0.1554	-0.0081	1.1579	-3.4075	-26.9182		6.703	0.2899	6.4524	-0.447	-0.0116	6.64
6.765	5.4212	4.9787	-0.59	3.5273	0.0695	-0.064	-0.3014	4.0931	-25.9201		6.781	0.0294	6.7002	-0.0766	-0.0315	1.0879	-0.0324	3.6325	5.6317	-32.4529		6.781	-1.1687	3.805	5.1745	-0.2138	-0.0026	3.5427	0.2696	5.3111	-22.8352		6.781	6.5412	0.6882	-0.2261	7.1486	0.1777	-0.0251	-0.7455	-3.2793	-26.4645		6.766	0.2899	6.5437	-0.447	-0.0235	6.8238
6.828	5.3691	4.9918	-0.564	3.4097	0.0506	-0.0251	-0.1111	4.5419	-25.1035		6.844	0.0294	6.7915	-0.0831	-0.0332	1.0828	-0.0397	2.3	5.3111	-32.2715		6.843	-1.1948	3.8311	5.194	-0.2104	0.0008	3.5961	0.3331	4.7342	-24.1054		6.844	6.6063	0.7012	-0.2326	7.3206	0.1142	-0.0081	0.0793	-3.2152	-27.1904		6.828	0.2899	6.6219	-0.4535	0.0004	7.0745
6.89	5.2779	4.9918	-0.538	3.1985	0.085	-0.0567	0.7138	4.8624	-24.0147		6.906	-0.0096	6.8958	-0.0896	-0.0196	1.0518	-0.0275	1.4752	4.606	-32.2715		6.906	-1.2078	3.8702	5.2395	-0.1984	0.0026	3.6496	0.6503	5.0547	-23.8332		6.906	6.6844	0.6621	-0.2391	7.4893	0.1983	0.0065	-0.6821	-4.1127	-25.5572		6.891	0.2899	6.7002	-0.4535	-0.0116	7.2926
6.953	5.2128	4.9787	-0.499	3.0145	0.0884	-0.0616	-0.1111	4.6701	-24.0147		6.969	0.0425	6.948	-0.0896	-0.0553	1.0123	-0.0445	1.7924	4.7983	-32.8159		6.968	-1.2078	3.8833	5.298	-0.2393	0.0026	3.7566	0.8407	5.3753	-23.2888		6.969	6.7626	0.6751	-0.2521	7.6511	0.1932	-0.0081	0.5869	-3.8563	-25.7386		6.953	0.2899	6.7784	-0.46	-0.0388	7.3785
7.015	5.1346	4.9787	-0.4795	2.9174	0.0592	-0.0445	0.5234	3.6443	-24.1054		7.031	0.0294	7.0393	-0.0831	-0.023	1.0656	-0.047	1.0945	5.247	-32.2715		7.031	-1.2469	3.9224	5.324	-0.253	-0.0078	3.8173	0.5869	4.9906	-24.1054		7.031	6.8277	0.6751	-0.2651	7.583	0.1623	-0.0202	0.0793	-2.3177	-25.7386		7.016	0.2899	6.8567	-0.46	-0.0303	7.5451
7.078	5.0695	4.9657	-0.4535	2.7249	0.1159	-0.0324	0.46	3.7084	-24.1962		7.094	0.0164	7.1045	-0.0896	-0.0434	1.1824	-0.0372	2.998	4.9906	-31.6363		7.093	-1.2338	3.9354	5.3695	-0.2496	-0.0112	3.8708	0.5234	4.5419	-23.2888		7.094	6.8407	0.649	-0.2716	7.3735	0.1674	-0.0032	0.3965	-0.8432	-26.646		7.078	0.2899	6.9349	-0.447	0.0004	7.7031
7.14	5.0044	4.9657	-0.421	2.5733	0.0695	-0.0421	-0.6186	4.7983	-24.2869		7.156	0.0164	7.1957	-0.0831	-0.0383	1.2425	-0.0421	3.2518	5.1188	-33.3603		7.156	-1.2599	3.9485	5.402	-0.2598	-0.0078	3.9315	0.3331	4.9906	-23.7425		7.156	6.8407	0.649	-0.2586	6.9084	0.2275	-0.0227	0.1427	-0.0739	-23.6518		7.141	0.2769	6.948	-0.4535	-0.0099	7.6447
7.203	4.9002	4.9787	-0.395	2.3808	0.0884	-0.0324	-0.3014	5.3753	-24.8313		7.219	0.0294	7.287	-0.0961	-0.0059	1.3094	-0.0421	2.9345	4.9265	-32.5437		7.218	-1.2469	3.9746	5.4475	-0.2581	0.0111	4.0142	0.46	5.1188	-23.924		7.219	6.7886	0.6099	-0.2456	6.8334	0.0592	0.0114	-0.1745	-3.087	-22.3815		7.203	0.2899	6.974	-0.4535	-0.0252	7.1449
7.265	4.8481	4.9787	-0.356	2.2428	0.0936	-0.0348	-0.0476	4.4777	-22.9259		7.281	0.0164	7.3392	-0.0896	-0.0366	1.2888	-0.03	2.8076	4.7983	-32.4529		7.281	-1.2729	4.0137	5.4865	-0.2615	0.0283	4.0603	-0.1745	5.247	-24.1054		7.281	6.6975	0.623	-0.2196	6.6784	0.1262	-0.0057	0.2062	-5.9078	-21.1112		7.266	0.2769	6.9088	-0.4405	0.0157	6.9492
7.328	4.783	4.9787	-0.3366	2.0997	0.1348	-0.0421	-0.5552	4.9906	-23.1074		7.344	0.0294	7.4566	-0.0831	-0.0451	1.2906	-0.03	2.6173	4.7342	-32.8159		7.343	-1.2599	4.0528	5.5255	-0.2751	0.018	4.1478	0.5869	4.9906	-23.4703		7.344	6.6193	0.6099	-0.2066	6.1264	0.1812	0.0138	0.3965	-1.3561	-20.3854		7.328	0.2769	6.8567	-0.4145	-0.0116	6.5713
7.39	4.7049	4.9657	-0.3106	2.0128	0.1365	-0.0275	-0.0476	4.8624	-23.2888		7.406	0.0294	7.5609	-0.1026	-0.04	1.3369	-0.03	2.8711	5.1188	-33.9047		7.406	-1.2599	4.0398	5.5645	-0.2819	0.0317	4.2426	0.3965	5.3111	-23.924		7.406	6.5672	0.6099	-0.1871	5.6494	0.1159	0.0089	-0.1745	1.5288	-20.6576		7.391	0.2769	6.7523	-0.408	-0.0167	6.1094
7.453	4.6267	4.9787	-0.2846	1.9106	0.1846	-0.0518	-0.5552	4.3495	-23.1981		7.469	0.0294	7.6261	-0.0961	-0.0298	1.385	-0.03	2.998	4.8624	-31.6363		7.468	-1.2729	4.0658	5.6034	-0.2649	0.0214	4.2888	0.2062	4.8624	-23.924		7.469	6.5021	0.5969	-0.1806	5.5847	0.164	-0.0081	0.46	-0.5227	-18.3892		7.453	0.2899	6.7132	-0.4405	0.0038	5.9411
7.515	4.5356	4.9787	-0.2521	1.6874	0.1863	-0.03	-0.238	5.3111	-23.4703		7.531	0.0164	7.6913	-0.0896	-0.0315	1.4898	-0.0372	3.3787	4.9906	-33.7232		7.531	-1.2859	4.0658	5.6424	-0.2973	-0.0078	4.386	0.2696	5.3111	-23.8332		7.531	6.424	0.5969	-0.1546	5.37	0.1365	0.0138	-0.4283	-0.5227	-17.7541		7.516	0.2899	6.648	-0.434	-0.0405	5.6148
7.578	4.4574	4.9918	-0.2261	1.5954	0.1691	-0.03	-0.1745	4.8624	-23.561		7.594	0.0164	7.7696	-0.0961	-0.0332	1.5396	-0.0494	2.9345	4.6701	-32.9973		7.593	-1.299	4.0528	5.6879	-0.2785	-0.0198	4.4614	0.2696	5.0547	-23.924		7.594	6.3588	0.5969	-0.1416	5.1281	0.1228	-0.0081	0.6503	-2.1254	-17.4819		7.578	0.2769	6.5567	-0.4145	-0.049	5.115
7.64	4.3793	4.9918	-0.1936	1.4677	0.1949	-0.0616	-0.809	5.247	-22.9259		7.656	0.0294	7.8609	-0.0961	-0.0724	1.61	-0.0397	3.1883	4.4136	-33.9954		7.656	-1.299	4.0528	5.7334	-0.2938	-0.0112	4.5537	0.8407	5.1188	-23.924		7.656	6.2937	0.5838	-0.1286	4.9186	0.1451	0.0089	0.3331	-1.1638	-16.3023		7.641	0.2899	6.4654	-0.4015	0.0072	4.7596
7.703	4.2751	4.9787	-0.1676	1.3944	0.1657	-0.0445	-0.6186	4.4136	-23.1074		7.719	0.0425	7.9521	-0.0961	-0.0485	1.61	-0.0275	2.8711	4.7342	-34.1769		7.718	-1.312	4.0528	5.7659	-0.2887	-0.0198	4.6631	0.5869	4.606	-23.6518		7.719	6.2156	0.5838	-0.1156	4.7636	0.1537	0.0065	0.5234	-0.9714	-17.0282		7.703	0.2899	6.4002	-0.4275	-0.015	4.7235
7.765	4.21	4.9787	-0.1546	1.2922	0.2275	-0.047	-0.4917	5.0547	-23.0166		7.781	0.0294	8.0304	-0.0961	-0.023	1.6495	-0.0397	2.9345	4.7983	-33.451		7.781	-1.325	4.0789	5.8114	-0.3092	-0.0198	4.7165	0.9676	5.3753	-24.1054		7.781	6.1374	0.5838	-0.1026	4.4552	0.0592	0.0016	0.0158	0.3107	-15.9394		7.766	0.2899	6.322	-0.4275	-0.0593	4.4625
7.828	4.1449	4.9918	-0.1156	1.2223	0.2327	-0.0397	-0.3648	5.0547	-23.3796		7.844	0.0294	8.0826	-0.1091	-0.0519	1.7268	-0.0494	2.4269	4.9265	-32.7251		7.843	-1.325	4.0528	5.8504	-0.3024	-0.0129	4.787	0.3965	4.6701	-22.563		7.844	6.0593	0.6099	-0.0831	4.2849	0.121	0.0016	0.2696	0.1825	-15.4857		7.828	0.2639	6.2568	-0.4145	-0.1036	4.2289
7.89	4.0797	4.9918	-0.0961	1.0503	0.2447	-0.0348	-0.3648	5.6958	-23.1074		7.906	0.0425	8.1869	-0.0961	-0.0315	1.8023	-0.0348	2.6173	4.4777	-32.6344		7.906	-1.312	4.0789	5.8959	-0.3041	-0.0249	4.8478	0.7138	5.1188	-23.7425		7.906	5.9942	0.5838	-0.0766	4.2525	0.085	0.0089	0.3331	-1.292	-15.2135		7.891	0.2899	6.1916	-0.4275	-0.003	3.8975
7.953	3.9755	4.9657	-0.0701	0.9753	0.2722	-0.0397	-0.6186	6.7215	-23.2888		7.969	0.0294	8.239	-0.0961	-0.04	1.9414	-0.0372	2.8076	4.5419	-33.3603		7.968	-1.338	4.0789	5.9414	-0.333	0.0008	4.9353	0.5234	5.3111	-22.9259		7.969	5.89	0.6099	-0.0701	4.1094	0.1022	0.0138	1.3483	-1.8048	-13.2174		7.953	0.2899	6.1003	-0.4405	-0.0184	3.7274
8.015	3.9104	4.9918	-0.0441	0.914	0.2962	-0.0397	-0.3014	5.1188	-23.2888		8.031	0.0425	8.3434	-0.1026	-0.0417	2.0187	-0.0397	3.7594	5.247	-33.0881		8.031	-1.338	4.0789	5.9674	-0.316	-0.006	5.0252	0.7772	5.3111	-23.6518		8.031	5.8249	0.6099	-0.0571	3.8215	0.1348	-0.0057	0.3965	-0.2021	-14.5784		8.016	0.2769	6.0481	-0.421	-0.0388	3.5763
8.078	3.8453	4.9918	-0.0311	0.8118	0.2825	-0.03	-0.7455	5.0547	-22.7444		8.094	0.0294	8.4216	-0.1026	-0.0366	2.1612	-0.0324	3.9497	5.0547	-33.9047		8.093	-1.3511	4.0919	6.0129	-0.345	-0.0112	5.1054	1.4117	4.7983	-23.561		8.094	5.7728	0.5969	-0.0506	3.6716	0.0524	-0.0081	0.2062	-0.2663	-14.034		8.078	0.2899	5.9699	-0.4275	-0.0201	3.4407
8.14	3.7932	4.9787	-0.0116	0.7879	0.3134	-0.047	-1.0628	4.9906	-23.7425		8.156	0.0164	8.5129	-0.1091	-0.0213	2.2729	-0.03	3.7594	4.8624	-34.2676		8.156	-1.3511	4.118	6.0389	-0.3467	-0.0232	5.171	0.9041	5.0547	-23.561		8.156	5.6816	0.5969	-0.0311	3.4825	0.109	-0.0032	0.9041	0.5672	-13.7618		8.141	0.2899	5.8655	-0.434	-0.0133	3.2414
8.203	3.7021	4.9787	0.0079	0.7215	0.3014	-0.03	-0.0476	4.9906	-23.1074		8.219	0.0294	8.5781	-0.1091	-0.0383	2.2729	-0.0324	3.0614	4.9265	-34.3583		8.218	-1.3641	4.105	6.0844	-0.333	-0.006	5.2318	0.6503	4.6701	-23.8332		8.219	5.6165	0.5969	-0.0246	3.4689	0.109	0.0065	0.9041	-0.0739	-13.7618		8.203	0.2899	5.8003	-0.4275	-0.0576	3.0388
8.265	3.6239	4.9918	0.0339	0.5784	0.3117	-0.0397	-0.7455	4.9265	-23.1074		8.281	0.0294	8.6433	-0.1156	-0.0247	2.3278	-0.0445	2.7442	5.1829	-33.9047		8.281	-1.3901	4.118	6.1104	-0.3381	-0.0249	5.329	1.2848	5.5676	-24.3776		8.281	5.5384	0.6099	-0.0246	3.4109	0.0678	-0.0008	0.46	-1.4202	-13.3989		8.266	0.2769	5.7221	-0.4145	-0.0167	2.8018
8.328	3.5458	5.0048	0.0534	0.5171	0.3048	-0.0348	-0.6186	5.4394	-23.7425		8.344	0.0294	8.7346	-0.1221	-0.0264	2.4704	-0.0397	2.9345	5.1829	-34.7213		8.343	-1.3771	4.118	6.1559	-0.3569	-0.0335	5.3727	1.2848	5.0547	-23.561		8.344	5.4732	0.5969	-0.0311	3.2303	0.1296	0.0187	1.0945	-0.7791	-14.3969		8.328	0.2899	5.6438	-0.434	-0.0201	2.6885
8.39	3.4546	4.9787	0.0794	0.437	0.3203	-0.0275	-0.1745	5.8881	-23.561		8.406	0.0294	8.8129	-0.1156	-0.0315	2.7125	-0.0348	4.4573	4.9265	-34.3583		8.406	-1.3901	4.118	6.1948	-0.3586	-0.0009	5.4821	1.8559	4.9906	-24.6498		8.406	5.4081	0.5969	-0.0246	3.0208	0.1073	0.0138	0.46	0.1184	-14.1247		8.391	0.3029	5.5656	-0.4405	-0.0269	2.582
8.453	3.3895	5.0048	0.0924	0.3774	0.3598	-0.0518	-0.9993	5.4394	-22.7444		8.469	0.0164	8.865	-0.1221	-0.0093	2.7863	-0.0445	4.5208	5.5035	-34.4491		8.468	-1.4162	4.105	6.2468	-0.3927	-0.0215	5.5599	1.4117	5.1829	-25.0128		8.469	5.33	0.636	-0.0181	2.9322	0.0592	-0.0032	0.5234	-0.0739	-13.8525		8.453	0.2899	5.4743	-0.4275	-0.0456	2.4051
8.515	3.2983	4.9918	0.1119	0.3552	0.3615	-0.0324	-0.6186	5.6958	-23.8332		8.531	0.0164	8.9694	-0.1351	-0.0213	2.8877	-0.0275	4.3939	5.6317	-34.5398		8.531	-1.4031	4.1311	6.2858	-0.3722	-0.0352	5.6061	0.9041	4.9265	-25.1942		8.531	5.2388	0.636	-0.0116	2.7874	0.1056	-0.0057	0.3965	0.1825	-13.3081		8.516	0.2899	5.3961	-0.434	-0.0235	2.242
8.578	3.2462	4.9918	0.1054	0.3637	0.3323	-0.0275	-1.6338	4.4136	-22.8352		8.594	0.0425	9.0737	-0.1286	0.0043	2.9512	-0.0275	4.0132	5.1188	-35.8101		8.593	-1.4031	4.118	6.3313	-0.3671	-0.0232	5.7179	1.9828	4.7342	-25.3757		8.594	5.1998	0.649	-0.0116	2.7074	0.0558	-0.0032	0.8407	-0.2663	-14.3969		8.578	0.2899	5.3178	-0.447	-0.0507	2.0565
8.64	3.1551	4.9918	0.1119	0.3109	0.3546	-0.047	-0.9359	4.7342	-23.2888		8.656	0.0164	9.1519	-0.1221	0.0077	3.0233	-0.0324	3.7594	4.8624	-34.3583		8.656	-1.4162	4.1571	6.3833	-0.3773	-0.0198	5.7786	0.9676	4.3495	-24.4684		8.656	5.1086	0.649	-0.0116	2.6222	0.0798	-0.0105	0.46	-0.5227	-13.0359		8.641	0.2899	5.2526	-0.447	-0.0201	1.9981
8.703	3.0639	5.0048	0.1184	0.2564	0.3271	-0.0227	-0.9993	5.0547	-23.2888		8.719	0.0034	9.2432	-0.1351	-0.0025	3.147	-0.0445	3.1249	5.1188	-34.0861		8.718	-1.4162	4.1571	6.4158	-0.3705	-0.0232	5.8734	0.8407	4.3495	-25.0128		8.719	5.0044	0.6751	-0.0116	2.4927	0.0901	0.0211	1.031	-0.2021	-14.1247		8.703	0.2899	5.1744	-0.447	-0.0371	1.9294
8.765	2.9858	4.9787	0.1379	0.1576	0.3443	-0.0445	-1.1262	5.5676	-23.6518		8.781	0.0294	9.3084	-0.1546	-0.0111	3.3754	-0.0227	4.838	4.5419	-34.9027		8.781	-1.4292	4.1963	6.4613	-0.3892	-0.0284	5.9415	0.6503	5.9522	-25.1942		8.781	4.9523	0.6882	-0.0116	2.3632	0.0558	0.0089	0.5869	-0.0098	-13.7618		8.766	0.2769	5.0831	-0.46	-0.0337	1.8951
8.828	2.9076	4.9918	0.1704	0.0605	0.3426	-0.0616	-1.6338	5.824	-22.6537		8.844	0.0294	9.3867	-0.1546	-0.0042	3.4647	-0.0251	4.4573	4.5419	-35.0842		8.843	-1.4292	4.1963	6.4938	-0.4148	0.0008	6.0095	1.031	5.5676	-25.1942		8.844	4.8742	0.7142	-0.0116	2.2372	0.0867	0.0235	0.6503	0.4389	-14.5784		8.828	0.2769	5.0309	-0.4535	-0.0712	1.7954
8.89	2.8295	4.9787	0.1899	0.0452	0.3374	-0.0518	-1.5704	6.5292	-23.1981		8.906	0.0294	9.4649	-0.1611	-0.0128	3.5866	-0.0421	3.8228	4.4136	-34.9935		8.906	-1.4162	4.2354	6.5393	-0.4233	0.006	6.0848	0.3965	5.4394	-24.922		8.906	4.796	0.7403	-0.0181	2.1997	0.0833	0.0114	0.5869	0.2466	-14.034		8.891	0.2899	4.9527	-0.447	-0.0473	1.6924
8.953	2.7644	4.9527	0.1834	0.0554	0.334	-0.0251	-0.6821	5.3753	-22.563		8.969	0.0425	9.5301	-0.1611	-0.0145	3.6708	-0.03	3.569	5.6958	-36.0823		8.968	-1.4292	4.2484	6.5718	-0.4216	0.0146	6.1407	0.9041	4.9265	-25.4664		8.969	4.7179	0.7534	0.0014	2.0855	0.0678	0.0016	0.5869	-0.2663	-14.1247		8.953	0.2899	4.8874	-0.447	-0.0286	1.5499
9.015	2.6602	4.9135	0.1639	0.0707	0.3082	-0.0275	-1.1897	4.7342	-22.7444		9.031	0.0294	9.5953	-0.1676	0.0196	3.8322	-0.0445	3.9497	5.1829	-34.4491		9.031	-1.4422	4.2745	6.6108	-0.425	0.0008	6.2452	0.9041	6.0804	-25.8294		9.031	4.6528	0.7794	-0.0051	2.0004	0.0781	-0.0227	0.2696	-0.2021	-14.3969		9.016	0.2899	4.7962	-0.46	-0.015	1.4468
9.078	2.5951	4.8744	0.1379	0.069	0.3237	-0.03	-1.0628	5.5035	-22.563		9.094	0.0294	9.6866	-0.1676	0.0145	4.0057	-0.0275	5.0918	4.9265	-36.0823		9.093	-1.4552	4.2745	6.6498	-0.4216	0.0146	6.3182	1.031	4.9265	-25.0128		9.094	4.5746	0.7925	-0.0116	1.9305	0.0695	0.043	1.031	-0.3304	-13.9433		9.078	0.2899	4.7049	-0.4535	-0.0167	1.3902
9.14	2.4909	4.8483	0.1379	0.0128	0.3254	-0.0421	-0.9359	5.6317	-23.1981		9.156	0.0294	9.7518	-0.1871	0.0043	4.1602	-0.0543	4.0132	4.7342	-35.9008		9.156	-1.4422	4.3006	6.6953	-0.4318	0.0214	6.3959	0.7138	4.7342	-25.4664		9.156	4.4965	0.7925	-0.0051	1.7823	0.0506	0.0138	0.5234	0.3107	-14.6691		9.141	0.2899	4.6136	-0.4535	-0.0456	1.3575
9.203	2.4127	4.7831	0.1249	-0.0451	0.3391	-0.03	-1.1262	6.5933	-22.8352		9.219	0.0294	9.8431	-0.1871	0.0026	4.2444	-0.0421	4.9014	5.247	-35.6286		9.218	-1.4552	4.3006	6.7343	-0.4267	0.0197	6.5004	0.7138	6.0163	-25.5572		9.219	4.4053	0.8186	-0.0051	1.7005	0.0919	-0.0057	0.2696	0.5672	-12.5823		9.203	0.2769	4.5484	-0.4535	-0.0456	1.2888
9.265	2.3476	4.7309	0.1444	-0.0536	0.2996	-0.047	-2.1414	5.6958	-22.2		9.281	0.0034	9.8822	-0.1936	-0.0162	4.3903	-0.0275	5.1552	4.8624	-35.4471		9.281	-1.4813	4.3136	6.7732	-0.4114	0.018	6.5928	0.46	5.3753	-25.6479		9.281	4.3142	0.8447	-0.0116	1.6102	0.0455	0.0187	0.3965	0.5672	-13.8525		9.266	0.2899	4.4571	-0.4535	-0.0218	1.2442
9.328	2.2434	4.7049	0.1574	-0.0179	0.3357	-0.0494	-1.1262	5.1829	-22.1093		9.344	0.0164	9.9866	-0.1871	-0.0059	4.5552	-0.047	4.0132	4.9906	-36.0823		9.343	-1.4683	4.3006	6.8252	-0.4318	0.0111	6.6876	0.46	5.5035	-25.1942		9.344	4.249	0.8577	-0.0116	1.5642	0.109	-0.0105	0.3331	0.2466	-13.3989		9.328	0.3029	4.3788	-0.46	-0.0235	1.1016
9.39	2.1653	4.6657	0.1119	-0.0008	0.3014	-0.0275	-1.9511	5.3753	-22.8352		9.406	0.0294	10.0518	-0.2001	-0.0042	4.6806	-0.0397	5.1552	5.1188	-35.9008		9.406	-1.4683	4.3006	6.8447	-0.4387	-0.0026	6.7581	1.031	5.5676	-25.6479		9.406	4.1969	0.8838	-0.0116	1.4978	0.1142	-0.0008	0.3331	0.6313	-12.8545		9.391	0.2899	4.3267	-0.46	-0.015	1.0278
9.453	2.0871	4.6266	0.0924	-0.0196	0.31	-0.0397	-1.2531	5.5676	-22.2908		9.469	0.0164	10.1431	-0.2001	-0.0059	4.8197	-0.047	4.5842	5.4394	-35.3564		9.468	-1.4683	4.3397	6.8837	-0.4608	-0.0009	6.8358	0.46	5.3753	-24.922		9.469	4.0797	0.9099	-0.0116	1.4654	0.0953	-0.0178	0.2696	0.1825	-13.3989		9.453	0.2899	4.2484	-0.4665	-0.0644	0.978
9.515	2.009	4.6005	0.0729	-0.0485	0.3323	-0.047	-1.1262	5.4394	-22.1093		9.531	0.0294	10.2213	-0.2001	0.0094	5.0378	-0.0421	4.5842	4.6701	-35.7193		9.531	-1.4813	4.3136	6.9292	-0.4795	-0.0026	6.9306	0.9041	5.3111	-25.1942		9.531	4.0016	0.9229	-0.0116	1.3292	0.0919	0.0138	0.6503	0.3107	-14.2155		9.516	0.2769	4.1571	-0.4665	-0.0099	0.954
9.578	1.9439	4.5745	0.0924	-0.103	0.3082	-0.0372	-2.3318	5.6317	-22.8352		9.594	0.0294	10.2735	-0.2131	0.0366	5.1649	-0.0445	4.4573	5.0547	-35.9915		9.593	-1.4813	4.3267	6.9617	-0.4744	0.006	6.9938	0.7772	5.1829	-25.3757		9.594	3.9104	0.9229	-0.0181	1.2423	0.1142	-0.0032	-0.238	0.5672	-12.4915		9.578	0.2899	4.0658	-0.4665	-0.0252	0.9007
9.64	1.8657	4.5745	0.1119	-0.1082	0.3203	-0.0445	-0.9359	6.1446	-22.2		9.656	0.0164	10.3778	-0.2261	0.023	5.3125	-0.0688	4.5208	4.7342	-34.9027		9.656	-1.4943	4.3267	7.0137	-0.4915	0.0026	7.0959	0.5234	5.4394	-24.922		9.656	3.8453	0.9359	-0.0246	1.198	0.0833	0.0187	0.6503	0.3107	-12.7637		9.641	0.2769	3.9876	-0.46	-0.0286	0.8767
9.703	1.7746	4.5223	0.1249	-0.1218	0.3134	-0.0348	-1.9511	6.401	-22.8352		9.719	0.0294	10.43	-0.2261	0.0094	5.4362	-0.0591	4.3939	4.7342	-36.7174		9.718	-1.5073	4.3267	7.0527	-0.4932	-0.0095	7.1858	0.46	5.1188	-25.1035		9.719	3.7932	0.949	-0.0311	1.0924	0.1004	0.0259	0.0158	0.1825	-13.5803		9.703	0.2899	3.9224	-0.473	-0.0048	0.8423
9.765	1.6834	4.4832	0.1249	-0.1048	0.3271	-0.0372	-1.1897	5.6317	-23.2888		9.781	0.0425	10.5082	-0.2261	-0.0111	5.6766	-0.0372	4.5208	5.247	-36.0823		9.781	-1.4943	4.3658	7.0852	-0.4812	0.0094	7.2709	1.4117	4.9265	-25.1942		9.781	3.7021	0.9881	-0.0246	1.031	0.121	0.0211	0.46	0.3748	-12.4915		9.766	0.2899	3.8441	-0.473	-0.0184	0.7496
9.828	1.6053	4.4701	0.0989	-0.0707	0.3168	-0.03	-1.7607	5.5676	-22.8352		9.844	0.0294	10.5995	-0.2521	0.006	5.8827	-0.0324	4.9649	5.1829	-35.9915		9.843	-1.4943	4.3658	7.1307	-0.4966	0.0008	7.3025	0.0793	5.1188	-25.5572		9.844	3.6239	0.9751	-0.0311	0.9782	0.085	0.0332	0.3965	0.3107	-13.1267		9.828	0.2769	3.7398	-0.4665	-0.0252	0.6775
9.89	1.5141	4.4571	0.0729	-0.0724	0.2739	-0.0372	-1.6973	5.5035	-22.6537		9.906	0.0425	10.6517	-0.2586	0.0111	5.9737	-0.03	4.9649	5.1829	-36.0823		9.906	-1.5073	4.3658	7.1762	-0.4881	0.0232	7.4337	0.9676	5.5035	-26.1016		9.906	3.5458	0.9881	-0.0311	0.9067	0.1159	0.0016	0.1427	0.5672	-13.1267		9.891	0.2769	3.6616	-0.4665	-0.0337	0.6654
9.953	1.449	4.431	0.0599	-0.1269	0.3288	-0.0372	-0.6186	6.4651	-23.2888		9.969	0.0294	10.7691	-0.2586	-0.0025	6.2279	-0.0543	4.2035	5.3111	-36.2637		9.968	-1.5073	4.3528	7.2152	-0.5068	0.0146	7.5188	1.2214	6.2728	-26.4645		9.969	3.4676	0.9881	-0.0376	0.83	0.1245	0.0235	0.2696	0.4389	-12.1286		9.953	0.2899	3.5964	-0.473	-0.0252	0.6569
10.015	1.3448	4.4571	0.0664	-0.1661	0.3203	-0.047	-1.1897	5.7599	-23.0166		10.031	0.0164	10.8212	-0.2651	0.0077	6.3927	-0.0494	5.0918	4.7983	-36.2637		10.031	-1.5073	4.3658	7.2477	-0.4898	0.0043	7.5722	0.1427	4.9265	-25.8294		10.031	3.3895	1.0011	-0.0376	0.7602	0.0815	0.0138	0.7138	0.8877	-13.6711		10.016	0.2899	3.5181	-0.4795	-0.0013	0.6397
10.078	1.3057	4.431	0.0924	-0.1729	0.3065	-0.047	-2.078	6.401	-23.561		10.094	0.0034	10.8995	-0.2716	0.0145	6.5851	-0.0421	5.7897	5.1188	-36.5359		10.093	-1.5204	4.3788	7.2802	-0.4864	0.018	7.6451	0.46	4.8624	-25.7386		10.094	3.3244	1.0142	-0.0376	0.7448	0.1073	0.0041	0.1427	0.3107	-13.1267		10.078	0.2769	3.4138	-0.4795	-0.0252	0.6294
10.14	1.2146	4.431	0.0989	-0.1967	0.3203	-0.0421	-0.8724	5.9522	-23.1074		10.156	0.0164	10.9647	-0.2651	-0.0025	6.8015	-0.0543	5.9801	5.1829	-36.7174		10.156	-1.5204	4.3919	7.3257	-0.517	0.0558	7.7229	0.2062	4.9906	-25.8294		10.156	3.2332	1.0272	-0.0441	0.6971	0.1039	0.0235	0.9041	0.6954	-13.2174		10.141	0.2899	3.3355	-0.473	-0.0405	0.5796
10.203	1.1234	4.431	0.0989	-0.1133	0.322	-0.0202	-1.0628	5.7599	-23.561		10.219	0.0164	11.0299	-0.2781	0.0145	6.9732	-0.0494	5.9166	4.8624	-37.0803		10.218	-1.5204	4.3919	7.3517	-0.517	0.042	7.7035	0.46	4.9906	-26.283		10.219	3.1551	1.0272	-0.0636	0.6801	0.1176	0.0162	0.1427	0.1825	-12.4008		10.203	0.2899	3.2573	-0.4795	-0.003	0.5178
10.265	1.0453	4.431	0.0534	-0.103	0.3185	-0.0251	-1.1262	5.5676	-23.6518		10.281	0.0294	11.1342	-0.2846	0.0213	7.0934	-0.0567	4.9649	4.7983	-36.9896		10.281	-1.5334	4.418	7.3517	-0.5187	0.0335	7.5188	0.5869	5.1188	-26.9182		10.281	3.0639	1.0272	-0.0701	0.646	0.1348	0.0089	0.1427	-0.2021	-13.4896		10.266	0.3029	3.2051	-0.486	-0.0542	0.4559
10.328	0.9411	4.418	0.0274	-0.1082	0.3168	-0.0251	-0.6186	5.4394	-23.1981		10.344	0.0164	11.2255	-0.2846	0.023	7.315	-0.0518	5.5359	4.7342	-36.6267		10.343	-1.5464	4.4049	7.3192	-0.5051	0.0506	7.3559	0.0158	5.4394	-26.1016		10.344	2.9988	1.0403	-0.0766	0.5659	0.1056	0.0357	0.2062	0.503	-12.2193		10.328	0.2899	3.1138	-0.4795	-0.0303	0.4559
10.39	0.8629	4.418	0.0079	-0.1576	0.2979	-0.0275	-1.38	5.3111	-23.1074		10.406	0.0294	11.3168	-0.2911	0.0128	7.4936	-0.0543	5.8532	4.9265	-36.8081		10.406	-1.5334	4.4049	7.2672	-0.4898	0.0695	7.1858	0.46	4.8624	-26.1016		10.406	2.9337	1.0142	-0.0896	0.5182	0.1125	-0.0129	0.2696	0.3107	-13.1267		10.391	0.2899	3.0225	-0.486	0.0055	0.4576
10.453	0.7848	4.431	0.0144	-0.1882	0.3185	-0.0372	-0.9359	5.7599	-23.7425		10.469	0.0294	11.369	-0.2911	0.0043	7.6807	-0.0688	5.9166	5.1188	-35.6286		10.468	-1.5204	4.418	7.2412	-0.4778	0.0919	7.0667	0.3331	5.1188	-26.283		10.469	2.8425	1.0142	-0.0896	0.4723	0.1039	-0.0008	0.0793	0.6313	-12.9452		10.453	0.2899	2.9443	-0.4925	-0.0405	0.5006
10.515	0.7197	4.4049	0.0469	-0.2121	0.3288	-0.047	-0.7455	6.4651	-23.924		10.531	0.0294	11.4211	-0.3041	0.0349	7.6395	-0.0591	4.7745	5.3753	-35.5379		10.531	-1.5334	4.418	7.2022	-0.4727	0.097	6.8966	0.46	4.4777	-27.7348		10.531	2.7513	1.0403	-0.0961	0.428	0.0833	0.0211	-0.0476	0.2466	-13.3989		10.516	0.2899	2.84	-0.486	-0.032	0.4336
10.578	0.6155	4.444	0.0469	-0.1814	0.3151	-0.0372	-1.4435	5.7599	-24.0147		10.594	0.0294	11.4733	-0.2976	0.0094	7.5519	-0.0518	2.6807	4.4136	-36.9896		10.593	-1.5334	4.4049	7.1632	-0.4795	0.1004	6.7435	0.1427	4.9265	-26.283		10.594	2.6862	1.0142	-0.1091	0.3871	0.1348	0.0114	-0.4283	0.6313	-12.4008		10.578	0.2899	2.7748	-0.4925	0.0106	0.3666
10.64	0.5504	4.431	0.0534	-0.1695	0.3134	-0.0397	-1.38	5.824	-24.922		10.656	0.0164	11.4472	-0.2976	0.0384	7.011	-0.0567	2.6807	4.4136	-33.6325		10.656	-1.5204	4.418	7.1307	-0.4608	0.1022	6.639	0.3965	5.0547	-27.1904		10.656	2.5951	1.0011	-0.1091	0.3717	0.1228	0.0259	0.0793	1.5288	-12.1286		10.641	0.2769	2.6965	-0.499	-0.0235	0.346
10.703	0.4592	4.431	0.0144	-0.1542	0.3288	-0.0372	-0.6821	5.247	-24.922		10.719	0.0294	11.369	-0.2976	0.0281	6.4924	-0.0445	0.7772	4.5419	-32.6344		10.718	-1.5334	4.418	7.0982	-0.4557	0.1107	6.4931	0.3331	4.9906	-26.8274		10.719	2.5299	1.0664	-0.1221	0.336	0.1245	0.0138	-0.5552	0.503	-12.7637		10.703	0.2899	2.6052	-0.499	-0.0235	0.3082
10.765	0.3811	4.418	-0.0051	-0.161	0.3117	-0.0445	-1.6973	5.247	-25.1942		10.781	0.0164	11.2907	-0.2976	0.0128	6.3292	-0.047	2.4904	4.7342	-29.368		10.781	-1.5204	4.3788	7.0592	-0.4352	0.1004	6.3352	-0.0476	4.7342	-26.5552		10.781	2.4518	1.0142	-0.1221	0.2763	0.1502	0.0357	0.2062	0.8877	-13.0359		10.766	0.2899	2.527	-0.5055	-0.0099	0.2739
10.828	0.3029	4.444	0.0079	-0.2087	0.3082	-0.0421	-1.5069	6.7215	-24.4684		10.844	0.0164	11.2385	-0.2911	-0.0008	5.9377	-0.0397	2.2366	4.606	-28.007		10.843	-1.5204	4.4049	7.0267	-0.4506	0.1434	6.1821	0.1427	4.9265	-26.5552		10.844	2.3737	1.0272	-0.1416	0.2746	0.0661	0.0114	0.6503	0.3107	-13.2174		10.828	0.2769	2.4748	-0.5055	-0.0371	0.2498
10.89	0.2118	4.431	0.0339	-0.2921	0.3374	-0.047	-1.1897	6.9138	-24.922		10.906	0.0294	11.1603	-0.2911	0.0145	5.6818	-0.0688	1.9828	4.4777	-28.007		10.906	-1.5204	4.3919	6.9812	-0.4267	0.1365	6.0848	0.1427	4.7983	-26.3738		10.906	2.2955	1.0142	-0.1676	0.2678	0.1004	0.0138	0.6503	0.5672	-13.4896		10.891	0.2899	2.3574	-0.512	-0.015	0.2069
10.953	0.1336	4.418	0.0599	-0.2308	0.3168	-0.0397	-2.3318	6.5292	-24.922		10.969	0.0425	11.069	-0.2846	-0.0128	5.4482	-0.0518	2.2366	4.8624	-26.9182		10.968	-1.5464	4.4049	6.9617	-0.4165	0.1605	5.9779	0.46	4.8624	-26.283		10.969	2.2044	1.0403	-0.1806	0.2286	0.1022	0.0211	0.0793	0.7595	-12.3101		10.953	0.2899	2.2662	-0.5055	-0.0116	0.2103
11.015	0.0555	4.4049	0.0534	-0.2308	0.2962	-0.0445	-0.809	5.8881	-25.7386		11.031	0.0164	11.0038	-0.2651	-0.0196	4.9639	-0.0275	-0.238	4.9265	-26.5552		11.031	-1.5204	4.4049	6.9097	-0.4216	0.1657	5.8224	0.2696	4.2854	-26.3738		11.031	2.1523	1.0272	-0.2001	0.198	0.1056	0.0357	0.2696	0.4389	-13.3989		11.016	0.2769	2.1879	-0.5185	-0.0269	0.2052
11.078	-0.0487	4.418	0.0079	-0.1303	0.3117	-0.0227	-1.3166	5.3753	-25.8294		11.094	0.0294	10.9255	-0.2586	-0.0417	4.818	-0.03	-0.238	5.4394	-25.1035		11.093	-1.5073	4.418	6.8707	-0.4148	0.1794	5.7057	-0.0476	4.606	-25.7386		11.094	2.0611	1.0533	-0.2066	0.1452	0.1073	0.0187	0.0158	1.4647	-13.2174		11.078	0.2769	2.1227	-0.525	-0.0303	0.2018
11.14	-0.1268	4.431	-0.0441	-0.1644	0.3014	-0.0348	-1.1897	5.6317	-25.9201		11.156	0.0425	10.8603	-0.2456	0.0077	4.5518	-0.047	-0.1745	5.3753	-25.1942		11.156	-1.5204	4.431	6.8317	-0.4165	0.1983	5.5672	0.2062	4.606	-27.1904		11.156	1.983	1.0403	-0.2066	0.1145	0.1279	0.0454	0.5234	1.08	-13.2174		11.141	0.2899	2.0314	-0.525	-0.0116	0.1897
11.203	-0.205	4.444	-0.0571	-0.1916	0.322	-0.0348	-1.0628	5.7599	-25.6479		11.219	0.0164	10.7951	-0.2521	-0.0179	4.2959	-0.0543	-0.6821	4.9906	-24.6498		11.218	-1.5204	4.4049	6.7992	-0.3807	0.1794	5.47	-0.238	4.1572	-27.0089		11.219	1.9048	1.0272	-0.2131	0.0907	0.1107	0.0041	0.3331	1.1441	-12.8545		11.203	0.2769	1.9532	-0.5445	-0.003	0.1468
11.265	-0.2571	4.431	-0.0311	-0.2887	0.3134	-0.0567	-1.4435	5.8881	-25.6479		11.281	0.0425	10.7169	-0.2391	-0.0468	4.1259	-0.0567	0.0793	5.7599	-24.3776		11.281	-1.5204	4.431	6.7668	-0.3875	0.176	5.329	0.2696	4.5419	-26.4645		11.281	1.8137	1.0272	-0.2391	0.0736	0.0936	0.0138	0.0793	0.8877	-13.8525		11.266	0.2899	1.8619	-0.538	-0.0405	0.1159
11.328	-0.3613	4.431	0.0209	-0.3467	0.3271	-0.0445	-1.2531	7.3626	-26.8274		11.344	0.0294	10.6386	-0.2456	-0.0281	3.9421	-0.0275	0.46	5.7599	-26.1016		11.343	-1.5334	4.418	6.7278	-0.3892	0.1983	5.2123	-0.4283	4.606	-26.1016		11.344	1.7616	1.0403	-0.2391	0.0787	0.109	0.0016	0.5869	1.2723	-13.2174		11.328	0.2899	1.7836	-0.5445	-0.0167	0.0781
11.39	-0.4524	4.444	0.0209	-0.345	0.3185	-0.0445	-1.4435	6.5292	-27.3718		11.406	0.0425	10.5474	-0.2456	-0.0264	3.6656	-0.0664	-0.6821	4.9906	-25.6479		11.406	-1.5073	4.418	6.6888	-0.3654	0.2292	5.1127	0.1427	4.1572	-27.0089		11.406	1.6443	1.0403	-0.2716	0.0702	0.097	0.0187	0.46	0.6313	-14.5784		11.391	0.2769	1.7445	-0.5445	-0.0286	0.0558
11.453	-0.5045	4.418	0.0209	-0.2956	0.3065	-0.03	-0.8724	6.8497	-27.3718		11.469	0.0164	10.4691	-0.2326	0.0043	3.5042	-0.047	-1.6973	4.7342	-24.8313		11.468	-1.5073	4.418	6.6498	-0.3858	0.2155	4.9887	0.2696	4.7983	-25.7386		11.469	1.5792	1.0403	-0.2976	0.0855	0.1228	0.0187	0.5869	0.1184	-14.034		11.453	0.2769	1.6402	-0.5575	-0.0184	0.0283
11.515	-0.6087	4.418	-0.0246	-0.2223	0.2979	-0.0202	-0.3648	5.824	-27.5533		11.531	0.0164	10.3909	-0.2391	-0.0093	3.2912	-0.0324	-1.0628	5.1188	-25.3757		11.531	-1.4943	4.418	6.6173	-0.362	0.2189	4.894	-0.4283	4.7342	-26.7367		11.531	1.5141	1.0403	-0.3171	0.0498	0.121	0.0357	0.0793	0.3748	-13.8525		11.516	0.2899	1.5489	-0.564	-0.0303	0.0129
11.578	-0.6869	4.431	-0.0831	-0.2325	0.3082	-0.0202	-0.8724	5.1829	-27.7348		11.594	0.0425	10.3257	-0.2326	-0.0196	3.1916	-0.0348	-1.0628	4.8624	-25.6479		11.593	-1.4813	4.3919	6.5783	-0.3484	0.2395	4.7943	0.1427	4.5419	-26.5552		11.594	1.4099	1.0403	-0.3366	0.0208	0.1056	0.0308	0.3331	0.503	-13.4896		11.578	0.2899	1.4706	-0.564	-0.0184	-0.0129
11.64	-0.765	4.431	-0.1091	-0.2376	0.2653	-0.0251	-1.0628	5.7599	-27.1904		11.656	0.0164	10.2474	-0.2326	-0.0417	3.0491	-0.03	0.0793	5.247	-24.8313		11.656	-1.4943	4.418	6.5328	-0.3688	0.2464	4.6801	0.7138	4.7342	-26.646		11.656	1.3448	1.0272	-0.3495	0.0055	0.1176	0.0381	0.3965	0.5672	-13.4896		11.641	0.2769	1.4185	-0.577	-0.0218	0.0111
11.703	-0.8431	4.431	-0.1026	-0.3211	0.2911	-0.0397	-0.809	5.7599	-28.3699		11.719	0.0294	10.1692	-0.2391	-0.0298	2.9512	-0.0324	0.0793	5.1188	-25.1035		11.718	-1.4552	4.418	6.4938	-0.3058	0.279	4.5416	-0.0476	4.606	-26.9182		11.719	1.2536	1.0272	-0.3625	-0.0354	0.1142	0.0211	0.3331	0.7595	-13.7618		11.703	0.2899	1.3272	-0.5705	-0.0354	-0.0713
11.765	-0.9083	4.431	-0.0636	-0.3671	0.2825	-0.0518	-1.38	6.5933	-28.0977		11.781	0.0034	10.0779	-0.2326	-0.0315	2.7297	-0.0251	0.0158	4.7983	-24.7406		11.781	-1.4813	4.418	6.4613	-0.3415	0.2636	4.4298	-0.4283	4.7342	-25.4664		11.781	1.1885	1.0142	-0.369	-0.0507	0.1159	0.0284	-0.1111	1.08	-13.2174		11.766	0.2899	1.2489	-0.577	-0.0286	-0.0988
11.828	-0.9994	4.418	-0.0571	-0.4131	0.2876	-0.0348	-0.809	7.2985	-27.7348		11.844	-0.0096	10.0257	-0.2326	-0.0741	2.6387	-0.0348	-0.1745	5.3753	-24.5591		11.843	-1.4683	4.418	6.4288	-0.3058	0.2619	4.3471	0.2062	4.7342	-25.9201		11.844	1.0713	1.0272	-0.382	-0.0439	0.109	0.0405	0.7138	1.1441	-13.8525		11.828	0.2769	1.1707	-0.577	-0.0201	-0.1245
11.89	-1.1036	4.431	-0.0506	-0.4387	0.2756	-0.0421	-1.0628	6.6574	-28.4606		11.906	0.0294	9.9605	-0.2196	-0.0264	2.4669	-0.047	-0.809	4.606	-24.4684		11.906	-1.4422	4.418	6.3963	-0.316	0.279	4.2523	0.46	4.2213	-26.5552		11.906	1.0192	1.0272	-0.4015	-0.0542	0.0953	0.0235	0.1427	1.08	-13.9433		11.891	0.2769	1.0924	-0.59	-0.003	-0.0868
11.953	-1.1817	4.418	-0.0506	-0.3892	0.2567	-0.0421	-0.7455	5.5676	-29.6402		11.969	0.0164	9.8822	-0.2391	-0.04	2.3948	-0.0372	-0.6186	5.4394	-24.3776		11.968	-1.4422	4.4049	6.3573	-0.3109	0.2636	4.1478	0.3965	4.9265	-26.1016		11.969	0.9281	1.0272	-0.408	-0.0729	0.1279	0.0478	0.2696	0.5672	-14.1247		11.953	0.2899	1.0011	-0.5965	0.0038	-0.1108
12.015	-1.2469	4.431	-0.0636	-0.3927	0.2258	-0.0445	-1.1897	5.5035	-28.7328		12.031	0.0164	9.7779	-0.2261	-0.0451	2.2454	-0.0202	-1.38	5.0547	-24.8313		12.031	-1.4422	4.418	6.3183	-0.3143	0.2808	4.0676	0.0158	5.0547	-25.7386		12.031	0.8499	1.0272	-0.434	-0.0814	0.1125	0.0405	0.5234	1.3365	-14.5784		12.016	0.2899	0.9099	-0.603	-0.0337	-0.1245
12.078	-1.325	4.431	-0.0766	-0.4625	0.2207	-0.0372	-0.9993	5.3111	-29.5495		12.094	0.0164	9.7127	-0.2196	-0.04	2.1578	-0.0348	-1.0628	4.8624	-23.924		12.093	-1.4162	4.4049	6.2728	-0.3058	0.2687	3.9486	0.3331	4.8624	-25.8294		12.094	0.7718	1.0272	-0.4405	-0.0984	0.109	0.0259	-0.1111	1.08	-14.9413		12.078	0.2899	0.8316	-0.616	-0.0507	-0.2482
12.14	-1.4031	4.418	-0.0701	-0.5323	0.2121	-0.0494	-0.809	6.6574	-29.368		12.156	0.0294	9.6214	-0.2196	-0.0673	2.0135	-0.0494	-1.6973	4.8624	-24.0147		12.156	-1.4162	4.418	6.2403	-0.3075	0.2842	3.8659	-0.1111	4.5419	-25.6479		12.156	0.6806	1.0142	-0.447	-0.1427	0.1262	-0.0008	0.1427	0.8236	-14.7599		12.141	0.2899	0.7534	-0.6095	-0.0252	-0.2705
12.203	-1.4943	4.431	-0.0506	-0.5971	0.1915	-0.0372	-0.6186	6.8497	-29.368		12.219	0.0034	9.5432	-0.2196	-0.0588	1.9294	-0.0372	-1.5069	5.1829	-24.1962		12.218	-1.4031	4.418	6.1883	-0.2615	0.2653	3.7687	-0.1745	4.4777	-25.4664		12.219	0.5894	1.0142	-0.46	-0.1223	0.1365	0.0235	0.3331	1.1441	-14.7599		12.203	0.2899	0.6751	-0.616	-0.0167	-0.2791
12.265	-1.5594	4.431	-0.0506	-0.6686	0.188	-0.0421	-0.9359	7.2985	-29.7309		12.281	0.0164	9.4649	-0.2196	-0.0502	1.859	-0.0445	-1.1897	4.7342	-23.924		12.281	-1.3901	4.4049	6.1494	-0.27	0.2842	3.6788	0.0793	4.3495	-26.1923		12.281	0.5113	1.0403	-0.486	-0.1121	0.109	0.0041	-0.238	0.9518	-15.3043		12.266	0.2769	0.6099	-0.6225	-0.0013	-0.2774
12.328	-1.6245	4.431	-0.0376	-0.7078	0.1691	-0.03	-0.8724	7.2344	-30.0939		12.344	0.0164	9.3867	-0.2196	-0.0502	1.7663	-0.0348	-1.1897	4.7342	-24.2869		12.343	-1.3771	4.3919	6.1169	-0.2717	0.2893	3.6132	0.5869	4.3495	-26.1016		12.344	0.4332	1.0272	-0.5185	-0.1121	0.1193	0.0259	0.0793	0.3748	-15.4857		12.328	0.3029	0.5056	-0.629	-0.0252	-0.2739
12.39	-1.7287	4.431	-0.0376	-0.7334	0.1125	-0.0421	-0.3648	5.824	-30.729		12.406	0.0164	9.3215	-0.2131	-0.069	1.6203	-0.0397	-1.1262	5.1829	-24.2869		12.406	-1.3901	4.4049	6.0844	-0.2649	0.2962	3.5038	0.0793	4.4777	-26.0108		12.406	0.368	1.0272	-0.5315	-0.141	0.1176	0.0016	-0.1111	0.3107	-14.4877		12.391	0.2899	0.4273	-0.642	-0.0013	-0.377
12.453	-1.8069	4.431	-0.0376	-0.7828	0.0936	-0.0397	-0.1111	7.1062	-30.0939		12.469	0.0294	9.2563	-0.2001	-0.0468	1.5327	-0.0445	-1.8242	5.4394	-24.0147		12.468	-1.3771	4.418	6.0454	-0.253	0.2842	3.4163	-0.1745	3.9649	-25.6479		12.469	0.2769	1.0272	-0.538	-0.1734	0.0953	0.0235	0.3331	1.1441	-14.5784		12.453	0.2899	0.3752	-0.6485	-0.0167	-0.3856
12.515	-1.885	4.444	-0.0441	-0.8117	0.0781	-0.0372	-0.6821	5.8881	-30.0031		12.531	0.0294	9.165	-0.2001	-0.0349	1.4314	-0.0372	-1.3166	5.247	-23.8332		12.531	-1.3641	4.418	6.0064	-0.2717	0.2962	3.3239	-0.6186	4.1572	-25.1035		12.531	0.1987	1.0272	-0.5445	-0.2007	0.1056	0.0065	-0.4283	1.0159	-15.3043		12.516	0.2899	0.2839	-0.6485	-0.0133	-0.4611
12.578	-1.9632	4.431	-0.0376	-0.9157	0.042	-0.03	-0.0476	7.1703	-30.9105		12.594	0.0164	9.0476	-0.2001	-0.0349	1.3592	-0.0397	-1.38	5.1829	-23.2888		12.593	-1.3511	4.418	5.9804	-0.2342	0.2825	3.2632	-0.3648	4.1572	-26.1016		12.594	0.1336	1.0272	-0.551	-0.216	0.1176	0.0114	-0.1111	0.5672	-15.8487		12.578	0.2899	0.2187	-0.6615	-0.0065	-0.4749
12.64	-2.0413	4.431	-0.0311	-0.994	0.0489	-0.0348	-0.5552	6.9138	-31.1827		12.656	0.0294	8.9824	-0.2001	-0.0673	1.3541	-0.0372	-1.6338	4.9265	-23.3796		12.656	-1.3511	4.418	5.9414	-0.2564	0.2911	3.1976	-0.3014	4.606	-26.4645		12.656	0.0555	1.0403	-0.5705	-0.2177	0.1228	0.0381	0.7138	1.0159	-16.8467		12.641	0.2899	0.1274	-0.668	-0.0167	-0.4989
12.703	-2.1064	4.431	-0.0311	-1.0179	0.0317	-0.0348	-0.4917	6.978	-32.1807		12.719	0.0164	8.8911	-0.2001	-0.0656	1.2699	-0.0372	-1.5704	5.247	-24.0147		12.718	-1.3511	4.418	5.9024	-0.2632	0.2979	3.0858	-0.3014	4.0931	-26.1923		12.719	-0.0357	1.0272	-0.5835	-0.216	0.1073	0.0187	0.1427	0.5672	-16.6653		12.703	0.2769	0.0491	-0.668	0.0106	-0.5023
12.765	-2.1976	4.444	-0.0376	-1.0894	-0.0404	-0.0494	-0.3014	6.6574	-30.9105		12.781	0.0164	8.8129	-0.2066	-0.0366	1.1755	-0.0397	-1.6973	5.1188	-23.4703		12.781	-1.338	4.418	5.8699	-0.2121	0.2808	3.008	-1.38	4.1572	-26.1923		12.781	-0.1268	1.0533	-0.603	-0.2279	0.0884	0.0065	0.5869	1.0159	-16.756		12.766	0.2899	-0.0422	-0.681	0.0021	-0.5865
12.828	-2.2757	4.444	-0.0441	-1.1252	-0.0112	-0.0397	-0.3014	6.401	-31.8178		12.844	0.0294	8.7607	-0.2001	-0.0605	1.124	-0.0251	-1.1262	5.1829	-23.924		12.843	-1.325	4.418	5.8309	-0.2342	0.2928	2.9375	0.0793	3.9649	-26.5552		12.844	-0.205	1.0403	-0.616	-0.2313	0.0815	0.0187	-0.1111	0.0543	-16.6653		12.828	0.2899	-0.1204	-0.6875	0.0481	-0.6123
12.89	-2.3539	4.418	-0.0376	-1.1678	-0.0335	-0.0251	0.3331	6.5292	-32.3622		12.906	0.0164	8.6564	-0.1936	-0.0553	1.0639	-0.0348	-1.6973	5.247	-22.563		12.906	-1.312	4.431	5.7854	-0.2087	0.2945	2.8549	-0.4917	4.029	-25.5572		12.906	-0.2831	1.0533	-0.6225	-0.3046	0.0798	0.0138	0.0158	0.9518	-17.119		12.891	0.3029	-0.1986	-0.681	0.0038	-0.6672
12.953	-2.432	4.431	-0.0311	-1.2496	-0.0129	-0.0324	0.46	6.7856	-31.9993		12.969	0.0294	8.5781	-0.1936	-0.0536	1.0312	-0.0275	-1.1897	4.9906	-23.561		12.968	-1.299	4.4049	5.7464	-0.2325	0.2979	2.7917	0.5234	4.5419	-26.7367		12.969	-0.3613	1.0533	-0.629	-0.3352	0.0764	0.0089	0.3331	1.2723	-17.119		12.953	0.2769	-0.2769	-0.694	0.0021	-0.6586
13.015	-2.4971	4.431	-0.0051	-1.333	-0.0318	-0.0397	0.7772	7.3626	-32.9973		13.031	0.0294	8.5129	-0.1936	-0.0826	0.9986	-0.03	-1.3166	5.3753	-22.6537		13.031	-1.312	4.418	5.7139	-0.2172	0.2962	2.7285	-0.6186	3.7726	-26.1016		13.031	-0.4394	1.0533	-0.629	-0.3131	0.1022	0.0016	0.1427	1.5929	-17.7541		13.016	0.2769	-0.3682	-0.694	0.0038	-0.6775
13.078	-2.5883	4.444	-0.0051	-1.4387	-0.0421	-0.0348	0.8407	7.2985	-32.3622		13.094	0.0164	8.4216	-0.1936	-0.0536	0.9145	-0.0275	-0.9359	4.7342	-23.2888		13.093	-1.299	4.418	5.6749	-0.2376	0.2928	2.6629	-0.0476	4.3495	-26.5552		13.094	-0.5176	1.0533	-0.642	-0.3318	0.0798	0.0454	0.46	1.1441	-18.6614		13.078	0.2899	-0.4334	-0.7005	-0.0269	-0.729
13.14	-2.6534	4.4701	0.0014	-1.4506	-0.0266	-0.0178	0.9676	7.0421	-33.1788		13.156	0.0294	8.3434	-0.1871	-0.0536	0.8595	-0.047	-1.6338	4.9265	-22.4722		13.156	-1.2859	4.418	5.6359	-0.2155	0.2979	2.5584	-0.238	4.6701	-27.0089		13.156	-0.6087	1.0664	-0.6745	-0.3506	0.1022	0.0162	0.9041	1.2082	-18.8429		13.141	0.2899	-0.5116	-0.7135	-0.0167	-0.7977
13.203	-2.7315	4.4962	0.0014	-1.5204	-0.0455	-0.0372	0.2696	7.1062	-32.5437		13.219	0.0294	8.239	-0.1806	-0.0656	0.844	-0.0397	-2.1414	5.1829	-22.1093		13.218	-1.2859	4.431	5.6034	-0.2087	0.2945	2.4757	-0.3648	4.1572	-25.5572		13.219	-0.6869	1.0664	-0.681	-0.354	0.1022	0.0235	0.7138	0.2466	-18.7522		13.203	0.2769	-0.6029	-0.72	-0.003	-0.8149
13.265	-2.8227	4.5092	0.0144	-1.5698	-0.061	-0.0397	0.9041	7.1062	-32.2715		13.281	0.0294	8.1869	-0.1806	-0.0724	0.8166	-0.0251	-0.9993	5.1829	-21.4742		13.281	-1.2859	4.431	5.558	-0.1899	0.31	2.432	-1.2531	4.029	-25.3757		13.281	-0.765	1.0664	-0.6875	-0.4341	0.0764	0.0114	0.46	1.2723	-19.5688		13.266	0.2899	-0.6812	-0.72	0.0157	-0.8475
13.328	-2.9008	4.5223	0.0144	-1.6431	-0.0455	-0.0421	0.6503	6.978	-33.0881		13.344	0.0164	8.1086	-0.1806	-0.0622	0.7444	-0.03	-1.38	5.3111	-22.1093		13.343	-1.2599	4.431	5.519	-0.2036	0.31	2.3712	-0.9359	4.606	-25.9201		13.344	-0.8431	1.0794	-0.694	-0.4272	0.0833	0.0284	0.7138	1.0159	-20.0224		13.328	0.2899	-0.7594	-0.733	0.0055	-0.9094
13.39	-2.9529	4.5484	0.0339	-1.7385	-0.0593	-0.0348	1.5386	7.4908	-32.8159		13.406	0.0425	8.0173	-0.1676	-0.0741	0.6569	-0.0372	-2.5221	5.0547	-22.4722		13.406	-1.2729	4.431	5.48	-0.2019	0.3014	2.3032	-1.3166	4.3495	-26.1016		13.406	-0.9213	1.0924	-0.7005	-0.4375	0.1039	0.0284	0.8407	1.0159	-19.478		13.391	0.2899	-0.8507	-0.733	-0.0116	-0.9849
13.453	-3.0311	4.5875	0.0534	-1.81	-0.0524	-0.0494	0.9676	7.0421	-33.0881		13.469	0.0294	7.9391	-0.1676	-0.0622	0.662	-0.0372	-2.2683	4.6701	-23.0166		13.468	-1.2338	4.4049	5.441	-0.2036	0.3031	2.2351	-0.6821	4.4777	-26.646		13.469	-1.0124	1.0664	-0.7135	-0.4596	0.0747	0.0308	0.9676	1.5929	-20.7483		13.453	0.2899	-0.942	-0.746	0.0089	-1.0055
13.515	-3.1222	4.6266	0.0664	-1.8663	-0.0507	-0.0494	0.5869	6.7856	-32.9973		13.531	0.0164	7.8348	-0.1676	-0.0553	0.7067	-0.0275	-1.38	4.6701	-22.6537		13.531	-1.2338	4.431	5.402	-0.1967	0.31	2.1914	-0.6821	4.7342	-27.0089		13.531	-1.0776	1.0924	-0.7135	-0.5516	0.0712	0.0162	0.7772	1.5929	-20.2946		13.516	0.2769	-0.9942	-0.746	0.0174	-1.0931
13.578	-3.2004	4.6527	0.0794	-1.9003	-0.0747	-0.0251	1.1579	6.978	-33.5417		13.594	0.0294	7.7565	-0.1611	-0.0485	0.7273	-0.0421	-1.3166	5.3753	-22.2		13.593	-1.2469	4.418	5.3695	-0.1848	0.3117	2.0845	-0.3014	4.3495	-27.0996		13.594	-1.1557	1.0664	-0.7265	-0.5754	0.0953	0.0089	-0.0476	1.4006	-21.202		13.578	0.2769	-1.0594	-0.7525	-0.0048	-1.1154
13.64	-3.2785	4.7049	0.0924	-1.9548	-0.0301	-0.0275	1.1579	7.1062	-34.1769		13.656	0.0164	7.6652	-0.1741	-0.069	0.7273	-0.0251	-1.0628	5.3753	-21.7464		13.656	-1.2338	4.431	5.324	-0.1729	0.3065	2.0431	-0.809	4.7342	-26.8274		13.656	-1.2338	1.0924	-0.72	-0.6402	0.0609	-0.0008	0.5234	1.8493	-21.5649		13.641	0.2769	-1.1507	-0.7655	0.0361	-1.1292
13.703	-3.3567	4.757	0.1119	-1.9923	-0.0747	-0.0348	1.2214	6.9138	-34.2676		13.719	0.0164	7.587	-0.1676	-0.0519	0.6139	-0.0397	-1.6973	4.9906	-23.1074		13.718	-1.2208	4.418	5.2915	-0.1746	0.3151	1.9702	-1.5704	4.3495	-26.9182		13.719	-1.312	1.1055	-0.72	-0.6657	0.097	0.0089	0.5234	2.1057	-23.0166		13.703	0.2508	-1.255	-0.7655	0.0242	-1.1618
13.765	-3.4218	4.8092	0.1314	-2.1201	-0.0318	-0.0251	0.7138	6.9138	-33.451		13.781	0.0164	7.5218	-0.1546	-0.0588	0.5452	-0.0397	-2.3952	5.1829	-22.0186		13.781	-1.2599	4.4049	5.2395	-0.1746	0.3391	1.9095	-1.0628	3.9649	-27.4626		13.781	-1.4031	1.1185	-0.72	-0.6811	0.1193	0.0235	0.5869	1.5288	-23.561		13.766	0.2639	-1.3202	-0.7915	-0.0013	-1.1876
13.828	-3.513	4.8744	0.1509	-2.2036	-0.0507	-0.047	0.6503	7.4908	-33.1788		13.844	0.0294	7.4305	-0.1546	-0.04	0.5504	-0.0372	-2.1414	4.9265	-22.8352		13.843	-1.2078	4.418	5.207	-0.1746	0.3048	1.856	-1.2531	4.4136	-26.1016		13.844	-1.5073	1.0924	-0.733	-0.6896	0.073	0.0259	1.0945	1.2723	-23.0166		13.828	0.2508	-1.3854	-0.798	-0.0048	-1.27
13.89	-3.5781	4.9396	0.1769	-2.3262	-0.0644	-0.0372	0.8407	7.8114	-34.0861		13.906	0.0425	7.3392	-0.1546	-0.0605	0.5469	-0.0348	-1.2531	5.6958	-21.9278		13.906	-1.2208	4.418	5.168	-0.1797	0.334	1.8074	-0.809	4.4777	-27.3718		13.906	-1.5725	1.1055	-0.759	-0.6572	0.0919	0.0332	0.7772	0.8236	-24.0147		13.891	0.2508	-1.4636	-0.7915	0.0106	-1.3747
13.953	-3.6692	4.9787	0.2029	-2.391	-0.0301	-0.0372	0.9041	7.7473	-33.9954		13.969	0.0164	7.2479	-0.1611	-0.069	0.5761	-0.0445	-1.4435	5.7599	-22.2		13.968	-1.2208	4.418	5.142	-0.1882	0.3357	1.7539	-0.4917	4.5419	-27.4626		13.969	-1.6376	1.1055	-0.772	-0.7254	0.0609	0.0332	1.4117	1.3365	-23.2888		13.953	0.2378	-1.5549	-0.7915	0.0617	-1.3679
14.015	-3.7344	5.0179	0.2094	-2.4506	-0.0318	-0.0251	1.2848	7.619	-33.8139		14.031	0.0164	7.1697	-0.1481	-0.057	0.5985	-0.0397	-1.0628	5.1188	-23.561		14.031	-1.2078	4.3919	5.0965	-0.1729	0.3409	1.6956	-0.6186	4.1572	-27.1904		14.031	-1.7157	1.1185	-0.7655	-0.8259	0.0764	0.0041	1.1579	1.5929	-23.8332		14.016	0.2378	-1.6201	-0.8175	0.031	-1.3507
14.078	-3.8125	5.0309	0.2224	-2.5937	-0.0421	-0.0251	1.4117	7.619	-34.3583		14.094	0.0294	7.0784	-0.1481	-0.0502	0.5401	-0.0567	-1.3166	5.3753	-22.1093		14.093	-1.2078	4.4049	5.051	-0.149	0.3134	1.613	-1.5069	4.4136	-27.0089		14.094	-1.8199	1.1185	-0.772	-0.8838	0.0901	0.0162	0.5869	1.9134	-24.6498		14.078	0.2248	-1.6984	-0.837	0.0344	-1.4366
14.14	-3.8776	5.0439	0.2419	-2.6908	-0.0919	-0.0445	0.8407	7.5549	-34.7213		14.156	0.0164	7.0132	-0.1481	-0.0605	0.4473	-0.0227	-2.078	4.8624	-21.9278		14.156	-1.2078	4.3919	5.012	-0.1746	0.3391	1.5741	-0.7455	4.6701	-27.644		14.156	-1.872	1.1316	-0.7655	-0.9315	0.0901	0.0041	0.7772	1.9775	-23.924		14.141	0.1987	-1.8027	-0.8305	0.043	-1.4864
14.203	-3.9427	5.07	0.2613	-2.7692	-0.085	-0.0445	1.1579	8.1319	-34.9027		14.219	0.0294	6.9349	-0.1416	-0.0349	0.425	-0.0348	-2.649	5.0547	-22.1093		14.218	-1.1817	4.3919	4.9731	-0.1695	0.31	1.5425	-1.2531	4.5419	-26.283		14.219	-1.9632	1.1316	-0.7655	-0.9673	0.0764	-0.0032	-0.1111	2.234	-24.4684		14.203	0.1727	-1.8679	-0.85	0.0123	-1.5619
14.265	-4.0339	5.057	0.2873	-2.8901	-0.0833	-0.03	1.5386	8.0037	-34.9935		14.281	0.0164	6.8567	-0.1351	-0.0536	0.3993	-0.0251	-2.8394	5.247	-22.8352		14.281	-1.1948	4.3788	4.9406	-0.1627	0.3271	1.4696	-1.38	4.1572	-26.4645		14.281	-2.0283	1.1446	-0.772	-0.969	0.0661	0.0065	1.2848	1.7211	-25.3757		14.266	0.1597	-1.9592	-0.85	0.043	-1.6547
14.328	-4.086	5.1091	0.2873	-3.0179	-0.0438	-0.047	0.9676	7.4267	-34.0861		14.344	0.0294	6.7784	-0.1156	-0.069	0.3598	-0.0372	-3.2835	5.0547	-21.9278		14.343	-1.1817	4.4049	4.8886	-0.161	0.3288	1.438	-1.1897	4.4777	-26.646		14.344	-2.1194	1.1316	-0.7785	-1.0354	0.0506	0.0211	1.4117	1.4647	-24.1054		14.328	0.1466	-2.0375	-0.8695	0.0157	-1.689
14.39	-4.1771	5.1483	0.3068	-3.0707	-0.0524	-0.03	1.4752	7.2985	-34.6305		14.406	0.0294	6.7002	-0.1026	-0.0673	0.3752	-0.0202	-1.38	5.3111	-22.4722		14.406	-1.1817	4.4049	4.8496	-0.1576	0.322	1.3894	-0.809	4.2213	-27.1904		14.406	-2.1846	1.1446	-0.7785	-1.0695	0.0712	-0.0057	-0.0476	1.4006	-25.3757		14.391	0.1336	-2.1288	-0.889	0.031	-1.6598
14.453	-4.2553	5.2004	0.3198	-3.1882	-0.0301	-0.0251	1.031	7.7473	-33.9047		14.469	0.0294	6.6219	-0.1091	-0.04	0.4061	-0.0397	-2.3318	4.9906	-20.839		14.468	-1.1687	4.4049	4.8236	-0.1388	0.3271	1.3335	-0.5552	4.3495	-27.5533		14.469	-2.2627	1.1185	-0.7785	-1.141	0.0506	0.0211	0.9676	2.2981	-25.0128		14.453	0.1076	-2.22	-0.8955	0.0225	-1.6753
14.515	-4.3204	5.2526	0.3393	-3.287	-0.0404	-0.0397	0.2696	7.619	-35.2657		14.531	0.0034	6.5176	-0.1026	-0.0434	0.4336	-0.03	-1.7607	5.0547	-22.1093		14.531	-1.1687	4.3919	4.7781	-0.1439	0.3151	1.263	-1.5069	4.2854	-27.0996		14.531	-2.3278	1.1316	-0.772	-1.262	0.0455	0.0162	0.5869	2.4263	-24.1962		14.516	0.1076	-2.2852	-0.9085	0.0174	-1.7594
14.578	-4.3985	5.2656	0.3588	-3.4421	-0.0387	-0.0397	0.5869	7.5549	-35.0842		14.594	0.0294	6.4394	-0.1091	-0.0536	0.4233	-0.0445	-1.8242	5.3753	-21.202		14.593	-1.1687	4.3919	4.7326	-0.1576	0.3082	1.2144	-1.6338	4.4136	-27.1904		14.594	-2.406	1.1446	-0.7785	-1.2824	0.1039	0.0162	0.46	2.6827	-25.3757		14.578	0.0946	-2.3635	-0.915	0.0106	-1.8659
14.64	-4.4637	5.3048	0.3718	-3.5375	-0.0043	-0.0397	0.2696	8.0037	-35.3564		14.656	0.0294	6.3611	-0.1026	-0.0622	0.3735	-0.0397	-2.0145	5.6958	-21.4742		14.656	-1.1557	4.4049	4.7066	-0.1388	0.3306	1.1804	-1.3166	4.4777	-27.0996		14.656	-2.4711	1.1316	-0.772	-1.3352	0.0472	0.0405	0.7772	2.4904	-26.1016		14.641	0.0815	-2.4417	-0.915	0.0157	-1.9329
14.703	-4.5288	5.3308	0.3783	-3.6806	0.0129	-0.0397	0.5869	8.0678	-34.5398		14.719	0.0294	6.2829	-0.1091	-0.0502	0.3203	-0.0227	-2.3952	5.3111	-22.563		14.718	-1.1427	4.3658	4.6546	-0.1507	0.3254	1.1512	-0.9993	4.6701	-27.3718		14.719	-2.5492	1.1446	-0.7785	-1.3693	0.1056	0.0089	0.3331	2.4263	-25.285		14.703	0.0815	-2.52	-0.928	0.0174	-2.0205
14.765	-4.6069	5.3569	0.3978	-3.8151	-0.0163	-0.0324	0.5869	7.8114	-35.3564		14.781	0.0294	6.2046	-0.0896	-0.0485	0.2945	-0.0421	-2.9028	4.9265	-21.1112		14.781	-1.1557	4.3919	4.6286	-0.1354	0.3237	1.0977	-1.3166	4.606	-27.3718		14.781	-2.6534	1.1576	-0.7785	-1.3864	0.0747	0.0041	0.2696	1.5929	-26.1016		14.766	0.0815	-2.5852	-0.9345	0.043	-2.0325
14.828	-4.659	5.37	0.4108	-3.9071	0.0111	-0.0372	0.5869	8.3242	-34.5398		14.844	0.0294	6.1394	-0.0896	-0.0298	0.3409	-0.0372	-3.1566	4.7983	-21.5649		14.843	-1.1427	4.4049	4.5961	-0.1167	0.3323	1.0516	-0.809	4.0931	-27.5533		14.844	-2.7185	1.1316	-0.7915	-1.4596	0.0592	0.0114	0.6503	1.8493	-25.8294		14.828	0.0946	-2.6765	-0.9474	0.06	-2.0222
14.89	-4.7372	5.383	0.4173	-4.0451	-0.0249	-0.0372	0.7772	8.5166	-35.2657		14.906	0.0294	6.0612	-0.0961	-0.0451	0.3563	-0.0397	-1.5704	5.247	-21.3834		14.906	-1.1297	4.3919	4.5571	-0.1099	0.346	1.0297	-0.5552	4.4777	-27.5533		14.906	-2.7967	1.1316	-0.785	-1.5175	0.0833	0.0138	-0.4283	1.5288	-26.646		14.891	0.0685	-2.7417	-0.9539	0.043	-2.1596
14.953	-4.8153	5.4091	0.4238	-4.1542	0.006	-0.0421	0.7772	8.6448	-35.4471		14.969	0.0294	5.9568	-0.0896	-0.0639	0.3718	-0.03	-1.5704	5.5676	-21.4742		14.968	-1.1297	4.3919	4.5246	-0.115	0.3546	0.9884	-0.3014	4.4777	-27.2811		14.969	-2.9008	1.1446	-0.7915	-1.6317	0.0197	0.0138	0.2696	2.3622	-25.7386		14.953	0.0946	-2.8199	-0.9604	0.0549	-2.2472
15.015	-4.8674	5.4221	0.4498	-4.287	-0.0043	-0.047	0.9041	8.3883	-35.2657		15.031	0.0294	5.8655	-0.0896	-0.0451	0.3288	-0.0275	-2.0145	5.5676	-21.5649		15.031	-1.1557	4.3788	4.4791	-0.1167	0.322	0.947	-1.38	4.2854	-26.9182		15.031	-2.9529	1.1316	-0.785	-1.7083	0.0867	0.0041	0.3331	2.6827	-25.8294		15.016	0.0946	-2.8982	-0.9604	0.0276	-2.2918
15.078	-4.9455	5.4221	0.4563	-4.4608	-0.0009	-0.0275	1.0945	8.4524	-35.0842		15.094	0.0164	5.7873	-0.0896	-0.0605	0.334	-0.0324	-2.078	5.8881	-21.5649		15.093	-1.1297	4.3919	4.4466	-0.1337	0.3357	0.9155	-1.1897	4.7342	-27.7348		15.094	-3.0181	1.1576	-0.7915	-1.7475	0.1331	0.0332	0.1427	1.7211	-26.0108		15.078	0.0946	-3.0156	-0.9734	0.0464	-2.2935
15.14	-5.0107	5.4613	0.4693	-4.5613	0.018	-0.0494	0.8407	8.5807	-34.0861		15.156	0.0294	5.709	-0.0831	-0.0366	0.2928	-0.03	-2.5221	4.5419	-21.2927		15.156	-1.1297	4.3788	4.4076	-0.1116	0.3203	0.862	-1.38	3.9008	-27.7348		15.156	-3.0832	1.1446	-0.785	-1.8463	0.0541	0.0259	-0.1111	2.234	-26.646		15.141	0.0555	-3.0677	-0.9799	0.0464	-2.3004
15.203	-5.0888	5.4873	0.4758	-4.7726	0.0146	-0.0397	0.9041	8.6448	-35.0842		15.219	0.0294	5.6178	-0.0831	-0.0673	0.3031	-0.0372	-2.3318	5.1188	-21.5649		15.218	-1.1166	4.4049	4.3817	-0.132	0.3271	0.8328	-1.0628	4.7342	-27.0996		15.219	-3.1743	1.1446	-0.785	-1.8906	0.0575	0.0259	1.4117	2.3622	-27.0089		15.203	0.0685	-3.159	-0.9994	0.0344	-2.4086
15.265	-5.1539	5.4873	0.4758	-4.9157	-0.006	-0.0372	0.8407	8.3242	-35.3564		15.281	0.0294	5.5395	-0.0766	-0.0536	0.2996	-0.0445	-2.2683	5.5676	-20.9298		15.281	-1.1427	4.3788	4.3297	-0.1013	0.334	0.8012	-1.0628	4.0931	-27.1904		15.281	-3.2395	1.1316	-0.7915	-1.9656	0.1056	0.0138	-0.1745	2.1699	-26.1923		15.266	0.0555	-3.2242	-1.0059	0.0583	-2.5734
15.328	-5.2321	5.5004	0.5018	-5.0741	0.0197	-0.0275	1.2214	8.8371	-35.5379		15.344	0.0294	5.4482	-0.0636	-0.0639	0.2962	-0.0372	-1.7607	5.4394	-21.5649		15.343	-1.1166	4.3788	4.2972	-0.1013	0.3203	0.7599	-1.5069	4.1572	-27.644		15.344	-3.3176	1.1316	-0.7915	-2.0371	0.0403	0.043	0.6503	2.7468	-26.4645		15.328	0.0685	-3.3025	-1.0189	0.0583	-2.6078
15.39	-5.3102	5.5265	0.5083	-5.1985	0.0317	-0.03	1.5386	8.3883	-36.3545		15.406	0.0294	5.3569	-0.0766	-0.0485	0.2842	-0.0348	-1.6338	5.1829	-21.202		15.406	-1.1166	4.3919	4.2582	-0.1184	0.3134	0.7162	-1.4435	4.2213	-26.8274		15.406	-3.3827	1.1446	-0.7915	-2.0763	0.1004	0.0138	-0.3648	2.7468	-27.0089		15.391	0.0425	-3.3938	-1.0124	0.0293	-2.6542
15.453	-5.3753	5.5395	0.5148	-5.3143	0.0146	-0.0324	1.3483	8.196	-35.5379		15.469	0.0294	5.2917	-0.0701	-0.0434	0.2413	-0.0348	-2.1414	5.9522	-20.7483		15.468	-1.1427	4.3919	4.2257	-0.1286	0.31	0.704	-1.7607	4.4136	-27.0996		15.469	-3.4739	1.1446	-0.798	-2.1564	0.0781	0.0089	-0.238	2.4904	-27.1904		15.453	0.0425	-3.459	-1.0319	0.0702	-2.6507
15.515	-5.4274	5.5395	0.5213	-5.4387	0.0369	-0.0202	1.3483	8.4524	-36.173		15.531	0.0164	5.1744	-0.0636	-0.0639	0.1932	-0.047	-3.0932	5.7599	-20.7483		15.531	-1.1297	4.3788	4.1932	-0.1099	0.3151	0.6676	-1.2531	4.4136	-27.0996		15.531	-3.565	1.1446	-0.7915	-2.2245	0.0575	0.0089	0.2696	3.0033	-27.0996		15.516	0.0425	-3.5503	-1.0384	0.0855	-2.7108
15.578	-5.5186	5.5525	0.5278	-5.6278	-0.0095	-0.0348	0.1427	8.773	-36.5359		15.594	0.0164	5.1352	-0.0571	-0.0673	0.1966	-0.0324	-2.2683	5.3111	-20.9298		15.593	-1.1166	4.3658	4.1477	-0.1201	0.3323	0.6408	-1.2531	4.2854	-27.1904		15.594	-3.6432	1.1446	-0.8045	-2.2944	0.1107	0.0187	0.0158	2.1057	-27.2811		15.578	0.0164	-3.6285	-1.0449	0.0889	-2.7864
15.64	-5.5707	5.5656	0.5473	-5.7777	0.042	-0.0397	1.031	9.0294	-36.173		15.656	0.0294	5.07	-0.0506	-0.0724	0.2842	-0.0372	-2.2683	5.1829	-20.4761		15.656	-1.1036	4.3788	4.1152	-0.1167	0.3288	0.6214	-0.809	4.606	-27.3718		15.656	-3.7213	1.1316	-0.7915	-2.4	0.018	0.0357	0.3331	2.9392	-27.1904		15.641	0.0164	-3.7198	-1.0644	0.0566	-2.9392
15.703	-5.6358	5.5917	0.5603	-5.9651	0.0627	-0.0202	1.9193	9.1576	-36.173		15.719	0.0294	4.9787	-0.0441	-0.0656	0.2979	-0.0348	-1.2531	5.3111	-20.7483		15.718	-1.1036	4.3658	4.0827	-0.0996	0.3288	0.5971	-1.6338	3.6443	-27.5533		15.719	-3.7864	1.1446	-0.798	-2.5192	0.0764	0.0259	0.0158	3.2597	-27.3718		15.703	0.0164	-3.785	-1.0644	0.0668	-2.9667
15.765	-5.7269	5.6047	0.5668	-6.0894	0.0129	-0.0275	0.9041	8.773	-36.0823		15.781	0.0164	4.9005	-0.0506	-0.0383	0.2979	-0.0324	-1.6338	5.4394	-20.6576		15.781	-1.1036	4.3658	4.0437	-0.1116	0.3065	0.5582	-1.3166	4.0931	-27.0089		15.781	-3.8646	1.1316	-0.798	-2.555	0.109	0.0405	0.0158	3.0033	-27.5533		15.766	0.0164	-3.8632	-1.0839	0.106	-3.0474
15.828	-5.7921	5.6178	0.5733	-6.3075	0.0438	-0.0324	1.4752	9.4782	-36.9896		15.844	0.0425	4.8092	-0.0376	-0.0349	0.2361	-0.0348	-1.8876	5.0547	-21.202		15.843	-1.1036	4.3528	4.0112	-0.0928	0.3323	0.5582	-0.7455	4.4136	-27.644		15.844	-3.9297	1.1185	-0.811	-2.6589	0.0661	0.0332	-0.1745	2.9392	-27.5533		15.828	-0.0096	-3.9415	-1.0839	0.0634	-3.1281
15.89	-5.8702	5.6438	0.5863	-6.471	0.1159	-0.0421	1.4117	8.9012	-35.9008		15.906	0.0164	4.7179	-0.0506	-0.0383	0.2052	-0.03	-1.9511	4.8624	-21.1112		15.906	-1.1036	4.3397	3.9657	-0.103	0.2979	0.5315	-0.9359	4.3495	-27.3718		15.906	-4.0209	1.1446	-0.8175	-2.7271	0.1245	0.0405	-0.1745	2.9392	-26.9182		15.891	-0.0227	-4.0197	-1.1034	0.0583	-3.1779
15.953	-5.9353	5.6569	0.5928	-6.5937	0.03	-0.0202	1.4117	9.7987	-36.9896		15.969	0.0425	4.6397	-0.0311	-0.057	0.1794	-0.0445	-2.4587	4.9906	-20.4761		15.968	-1.0906	4.3267	3.9397	-0.1065	0.3151	0.4683	-1.0628	4.4777	-27.1904		15.969	-4.086	1.1185	-0.8175	-2.802	0.0936	0.0259	-0.3648	3.2597	-27.5533		15.953	-0.0357	-4.1241	-1.1099	0.0838	-3.1934
16.015	-6.0004	5.683	0.6058	-6.793	0.1039	-0.0421	0.5869	9.8628	-35.9915		16.031	0.0294	4.5484	-0.0311	-0.0468	0.1932	-0.0445	-2.5856	5.247	-20.3854		16.031	-1.0906	4.3397	3.9007	-0.0962	0.3151	0.4658	-0.7455	4.7983	-27.1904		16.031	-4.1771	1.1055	-0.8175	-2.9298	0.0438	0.0114	-0.0476	3.7084	-27.1904		16.016	-0.0487	-4.1762	-1.1229	0.0753	-3.2947
16.078	-6.0786	5.696	0.6123	-6.9668	0.0489	-0.0227	0.9041	9.7987	-37.2618		16.094	0.0164	4.4832	-0.0311	-0.0468	0.2241	-0.03	-1.5704	4.8624	-21.2927		16.093	-1.1036	4.3397	3.8747	-0.0962	0.3082	0.4367	-1.5069	4.029	-27.1904		16.094	-4.2553	1.1055	-0.837	-2.9826	0.121	0.0284	-0.4283	3.7084	-28.0977		16.078	-0.0748	-4.2806	-1.1294	0.043	-3.348
16.14	-6.1567	5.709	0.6253	-7.2223	0.0627	-0.0324	1.0945	9.7346	-36.9896		16.156	0.0294	4.4049	-0.0246	-0.0298	0.231	-0.0348	-1.9511	4.9906	-20.839		16.156	-1.0776	4.3267	3.8357	-0.1082	0.3237	0.4172	-1.1262	4.1572	-27.1904		16.156	-4.3074	1.0924	-0.8305	-3.0848	0.097	0.0211	-1.1897	3.5802	-28.2792		16.141	-0.0878	-4.3458	-1.1359	0.0702	-3.4819
16.203	-6.2349	5.7221	0.6318	-7.3995	0.1417	-0.0105	1.6655	9.6705	-36.8081		16.219	0.0294	4.3397	-0.0246	-0.0553	0.188	-0.047	-2.649	5.5676	-20.7483		16.218	-1.0906	4.3267	3.8162	-0.1116	0.3203	0.4172	-1.0628	4.7342	-27.4626		16.219	-4.3855	1.0794	-0.8305	-3.1751	0.085	0.0308	-0.3014	3.5802	-27.644		16.203	-0.1008	-4.424	-1.1424	0.0992	-3.5523
16.265	-6.3	5.7221	0.6513	-7.5579	0.1022	-0.0445	0.9041	9.9269	-36.9896		16.281	0.0164	4.2615	-0.0181	-0.0588	0.1365	-0.0324	-3.347	4.8624	-21.3834		16.281	-1.0776	4.3267	3.7773	-0.1065	0.3151	0.3856	-1.38	4.4136	-27.0089		16.281	-4.4767	1.0533	-0.8435	-3.2211	0.0936	0.043	-1.0628	3.0674	-28.3699		16.266	-0.1138	-4.5023	-1.1619	0.0821	-3.5798
16.328	-6.3651	5.7351	0.6513	-7.7317	0.109	-0.03	1.5386	9.9269	-36.5359		16.344	0.0294	4.1571	-0.0116	-0.0622	0.0987	-0.0372	-2.8394	4.8624	-20.9298		16.343	-1.0645	4.3267	3.7318	-0.0826	0.3323	0.3711	-0.9359	4.3495	-27.7348		16.344	-4.5418	1.0272	-0.8435	-3.3557	0.0678	0.0284	-0.7455	3.6443	-28.4606		16.328	-0.1138	-4.5936	-1.1619	0.0872	-3.6708
16.39	-6.4042	5.7351	0.6643	-7.4898	0.1262	-0.0227	0.9676	9.0935	-36.9896		16.406	0.0164	4.0789	0.0014	-0.0605	0.1279	-0.0348	-2.078	5.247	-21.7464		16.406	-1.0645	4.3267	3.7058	-0.1013	0.3065	0.3516	-1.7607	4.1572	-27.3718		16.406	-4.6199	1.0142	-0.8565	-3.4835	0.0798	0.0357	-0.3014	4.4777	-29.0958		16.391	-0.1268	-4.6718	-1.1684	0.1009	-3.7773
16.453	-6.3911	5.7482	0.6643	-7.1388	0.1468	-0.0275	0.3331	6.9138	-34.6305		16.469	0.0164	4.0006	0.0014	-0.0639	0.1245	-0.0275	-1.6338	5.3111	-20.839		16.468	-1.0776	4.3267	3.6668	-0.1082	0.31	0.3443	-0.9993	4.6701	-28.1884		16.469	-4.7111	1.0011	-0.8565	-3.5465	0.0472	0.043	-0.5552	3.8367	-27.644		16.453	-0.1399	-4.7631	-1.1814	0.0668	-3.9456
16.515	-6.3651	5.7482	0.6643	-6.7896	0.0867	-0.0324	0.9676	8.3242	-32.9066		16.531	0.0425	3.9224	0.0014	-0.0605	0.1451	-0.0397	-2.4587	5.247	-20.9298		16.531	-1.0776	4.3397	3.6213	-0.103	0.3048	0.303	-1.2531	4.7983	-28.7328		16.531	-4.7762	0.9751	-0.8565	-3.6112	0.0369	0.0235	-0.238	3.2597	-28.9143		16.516	-0.1529	-4.8283	-1.1879	0.0787	-3.9954
16.578	-6.3	5.7351	0.6643	-6.3109	0.1159	-0.03	-0.4283	8.7089	-31.6363		16.594	0.0164	3.8702	0.0079	-0.0656	0.1056	-0.0275	-1.7607	5.4394	-20.7483		16.593	-1.0645	4.3397	3.5888	-0.0741	0.3203	0.303	-0.6186	4.1572	-28.2792		16.594	-4.8544	0.949	-0.8695	-3.71	0.0884	0.0187	-0.3014	3.1956	-28.0977		16.578	-0.1529	-4.9196	-1.1944	0.1111	-4.0006
16.64	-6.2349	5.7482	0.6578	-5.9514	0.2138	-0.0227	0.7138	8.4524	-29.4587		16.656	0.0294	3.7529	0.0144	-0.0622	0.1125	-0.0251	-1.6338	5.5676	-20.5668		16.656	-1.0645	4.3397	3.5498	-0.0622	0.3117	0.286	-1.5069	4.4136	-28.4606		16.656	-4.9455	0.9359	-0.8695	-3.8225	0.1022	0.0284	-0.6821	4.3495	-29.0958		16.641	-0.1659	-4.9848	-1.2009	0.1094	-4.0916
16.703	-6.1697	5.7482	0.6513	-5.7998	0.1502	-0.0348	-0.1111	7.8755	-31.1827		16.719	0.0164	3.6746	0.0404	-0.0605	0.1107	-0.0227	-2.0145	5.1829	-21.1112		16.718	-1.0645	4.3267	3.5108	-0.0826	0.3151	0.2495	-1.4435	4.606	-28.0977		16.719	-5.0237	0.9099	-0.876	-3.9519	0.0506	0.0308	-0.6821	3.9649	-28.2792		16.703	-0.192	-5.063	-1.2139	0.1009	-4.186
16.765	-6.1046	5.7482	0.6448	-5.3279	0.152	-0.0445	-0.3648	5.9522	-30.0031		16.781	0.0294	3.5964	0.0274	-0.069	0.0678	-0.03	-1.8242	5.8881	-21.202		16.781	-1.0645	4.3267	3.4718	-0.057	0.3168	0.252	-0.8724	4.2854	-28.6421		16.781	-5.0888	0.8838	-0.876	-3.9928	0.109	0.0162	-0.8724	4.029	-28.4606		16.766	-0.205	-5.1543	-1.2399	0.1094	-4.3973
16.828	-6.0525	5.7351	0.6383	-4.9719	0.2086	-0.0348	0.1427	5.1829	-29.1865		16.844	0.0294	3.5181	0.0404	-0.0451	0.0472	-0.03	-1.6338	5.3111	-21.202		16.843	-1.0515	4.3136	3.4458	-0.0911	0.31	0.2593	-1.1897	4.606	-27.4626		16.844	-5.18	0.8447	-0.8825	-4.1172	0.0352	0.0284	-1.1262	4.1572	-29.0051		16.828	-0.218	-5.2326	-1.2464	0.1077	-4.502
16.89	-6.0004	5.7351	0.6383	-4.96	0.2	-0.0227	0.1427	6.978	-28.7328		16.906	0.0294	3.4268	0.0534	-0.0502	0.018	-0.0324	-2.7125	4.606	-20.5668		16.906	-1.0515	4.3397	3.3938	-0.0928	0.322	0.2471	-0.8724	4.7983	-28.5514		16.906	-5.2451	0.8186	-0.889	-4.1887	0.0936	0.043	-0.809	3.1956	-28.6421		16.891	-0.231	-5.3108	-1.2724	0.106	-4.5862
16.953	-5.9223	5.7482	0.6253	-4.6652	0.2705	-0.0275	0.46	6.7856	-27.9162		16.969	0.0294	3.3225	0.0534	-0.0605	0.0043	-0.0202	-1.6973	5.8881	-21.0205		16.968	-1.0385	4.3136	3.3613	-0.0826	0.3323	0.2179	-0.8724	4.4136	-28.4606		16.969	-5.3232	0.8055	-0.902	-4.2126	0.0901	0.0284	-0.6821	3.1956	-28.007		16.953	-0.2701	-5.4021	-1.2724	0.1418	-4.6257
17.015	-5.8442	5.7221	0.6123	-4.3603	0.2275	-0.0445	0.2062	6.7856	-26.9182		17.031	0.0164	3.2703	0.0729	-0.0485	-0.0249	-0.0494	-2.1414	5.5676	-21.0205		17.031	-1.0385	4.3267	3.3288	-0.069	0.3323	0.2252	-0.809	4.2213	-28.3699		17.031	-5.4014	0.7664	-0.902	-4.3864	0.0386	0.0332	-0.1111	3.7726	-29.368		17.016	-0.2701	-5.4673	-1.2854	0.1315	-4.7218
17.078	-5.779	5.7482	0.6123	-4.0928	0.2189	-0.0202	-0.238	4.7983	-27.5533		17.094	0.0294	3.1921	0.0794	-0.0656	-0.0764	-0.0494	-2.4587	4.3495	-21.8371		17.093	-1.0255	4.3267	3.2898	-0.1048	0.3168	0.2228	-0.8724	4.6701	-28.5514		17.094	-5.4535	0.7664	-0.915	-4.5039	0.1022	0.0114	-1.1897	4.4777	-27.644		17.078	-0.2701	-5.5586	-1.2984	0.1486	-4.8764
17.14	-5.7269	5.7612	0.6058	-3.9054	0.2533	-0.0251	-0.3014	4.9906	-27.0089		17.156	0.0164	3.1138	0.0924	-0.0553	-0.0833	-0.03	-2.4587	4.8624	-21.5649		17.156	-1.0385	4.3397	3.2573	-0.057	0.3546	0.1863	-0.4917	4.4136	-28.6421		17.156	-5.5446	0.7273	-0.9085	-4.6232	0.0266	0.0284	-1.7607	4.4136	-28.9143		17.141	-0.2701	-5.6238	-1.3114	0.1332	-4.9777
17.203	-5.6618	5.7482	0.5993	-3.6891	0.2619	-0.0154	-0.3648	5.3111	-26.5552		17.219	0.0034	3.0225	0.1119	-0.057	-0.1228	-0.0494	-2.3952	5.6958	-21.202		17.218	-1.0255	4.3397	3.2183	-0.0673	0.3271	0.1863	-0.9359	4.7342	-29.0051		17.219	-5.6358	0.7142	-0.9215	-4.7152	0.0541	0.0284	-0.1111	4.5419	-28.4606		17.203	-0.2831	-5.7021	-1.3244	0.1571	-5.043
17.265	-5.5837	5.7351	0.5993	-3.6005	0.2687	-0.0202	-0.0476	5.247	-25.5572		17.281	-0.0096	2.9443	0.1249	-0.0758	-0.1554	-0.0397	-2.5856	5.1188	-21.7464		17.281	-1.0255	4.3658	3.1599	-0.0656	0.3357	0.1572	-1.3166	4.3495	-28.2792		17.281	-5.7139	0.7273	-0.928	-4.7884	0.0936	0.043	-1.1897	3.7084	-29.0051		17.266	-0.2962	-5.7933	-1.3309	0.1452	-5.1477
17.328	-5.5186	5.7351	0.5798	-3.3756	0.3168	-0.0324	0.3331	5.3753	-26.3738		17.344	-0.0227	2.866	0.1314	-0.0485	-0.152	-0.0348	-1.7607	5.4394	-22.1093		17.343	-1.0255	4.3267	3.1274	-0.0451	0.3563	0.1815	-0.9359	4.2213	-28.5514		17.344	-5.8051	0.6751	-0.928	-4.8957	0.0781	0.0308	-1.0628	4.3495	-29.5495		17.328	-0.3092	-5.8716	-1.3374	0.1843	-5.3212
17.39	-5.4665	5.7221	0.5733	-3.1916	0.2996	-0.0227	0.0793	4.606	-26.646		17.406	-0.0227	2.7748	0.1444	-0.0247	-0.2035	-0.0202	-2.2683	4.9265	-22.3815		17.406	-1.0255	4.3267	3.0884	-0.0962	0.3323	0.1742	-0.9993	4.5419	-28.7328		17.406	-5.8572	0.6751	-0.9409	-5.0422	0.1056	0.0357	-1.3166	4.0931	-28.1884		17.391	-0.3222	-5.9368	-1.3569	0.1878	-5.3693
17.453	-5.3883	5.7351	0.5668	-3.0128	0.2911	-0.0275	-0.0476	4.8624	-26.0108		17.469	-0.0227	2.7226	0.1444	-0.0434	-0.2293	-0.0275	-2.2049	5.247	-22.0186		17.468	-1.0124	4.3267	3.0559	-0.069	0.3563	0.1572	-0.9359	5.1188	-29.0051		17.469	-5.9223	0.6621	-0.9409	-5.1853	0.0712	0.0259	-1.3166	4.8624	-28.6421		17.453	-0.3482	-6.0151	-1.3764	0.1724	-5.5599
17.515	-5.3362	5.7221	0.5538	-2.822	0.3048	-0.0251	-0.5552	3.9649	-25.7386		17.531	-0.0227	2.6052	0.1509	-0.0605	-0.2705	-0.0494	-2.7125	4.8624	-21.7464		17.531	-0.9994	4.3267	3.0104	-0.0758	0.3563	0.1645	-0.8724	4.9265	-27.9162		17.531	-6.0135	0.636	-0.9409	-5.2961	0.0386	0.0332	-2.1414	4.9265	-29.2773		17.516	-0.3873	-6.0933	-1.3829	0.1758	-5.6767
17.578	-5.2711	5.7221	0.5473	-2.6056	0.3031	-0.0057	-0.3648	4.4136	-26.5552		17.594	-0.0096	2.54	0.1509	-0.0553	-0.2825	-0.03	-1.7607	5.5676	-22.2		17.593	-1.0124	4.3267	2.9649	-0.0741	0.358	0.1645	-1.1897	4.606	-28.1884		17.594	-6.1046	0.5969	-0.9345	-5.3012	0.1296	0.0381	-0.8724	3.6443	-28.7328		17.578	-0.4264	-6.1715	-1.3959	0.106	-5.7505
17.64	-5.193	5.7221	0.5408	-2.4915	0.3048	-0.0202	-0.6186	5.0547	-25.1035		17.656	-0.0227	2.4748	0.1574	-0.0656	-0.3375	-0.047	-2.5856	4.8624	-22.1093		17.656	-0.9994	4.3397	2.9194	-0.0553	0.3563	0.1499	-1.1262	4.4777	-28.7328		17.656	-6.1697	0.5708	-0.9474	-5.3864	0.0678	0.0235	-1.4435	4.0931	-29.1865		17.641	-0.4655	-6.2628	-1.4219	0.1281	-5.8553
17.703	-5.1279	5.709	0.5278	-2.3858	0.3323	-0.0227	-0.5552	4.8624	-25.6479		17.719	-0.0227	2.4096	0.1639	-0.0622	-0.3478	-0.0397	-2.7125	5.1188	-22.4722		17.718	-0.9864	4.3006	2.8804	-0.0485	0.3563	0.145	-2.0145	4.4136	-28.2792		17.719	-6.2479	0.5317	-0.9539	-5.5465	0.0506	0.0332	-1.1897	4.3495	-27.4626		17.703	-0.4785	-6.3411	-1.4219	0.123	-5.9909
17.765	-5.0497	5.7221	0.5343	-2.2427	0.2842	-0.0251	-0.809	5.1188	-25.0128		17.781	-0.0227	2.3183	0.1574	-0.0673	-0.4354	-0.0445	-2.5856	5.247	-22.9259		17.781	-0.9864	4.3267	2.8349	-0.0588	0.3391	0.1402	-0.7455	5.0547	-28.2792		17.781	-6.3	0.5056	-0.9604	-5.71	0.0712	0.0332	-0.7455	4.9265	-27.7348		17.766	-0.5045	-6.4193	-1.4479	0.1622	-6.13
17.828	-4.9846	5.709	0.5083	-2.0536	0.2928	-0.0275	-1.2531	4.4136	-25.5572		17.844	-0.0227	2.2401	0.1574	-0.0451	-0.4783	-0.0421	-3.347	5.6317	-22.4722		17.843	-0.9734	4.3528	2.7959	-0.0775	0.3237	0.1207	-1.6338	4.9265	-27.8255		17.844	-6.3781	0.4534	-0.9539	-5.7356	0.0661	0.0381	-0.5552	4.2213	-29.0958		17.828	-0.5176	-6.4845	-1.4544	0.1758	-6.2743
17.89	-4.9195	5.696	0.5018	-1.9088	0.3048	-0.03	-1.1262	3.6443	-25.4664		17.906	-0.0227	2.1618	0.1834	-0.0588	-0.5161	-0.0275	-3.0297	5.1829	-23.2888		17.906	-0.9864	4.3267	2.7634	-0.0366	0.3649	0.1134	-1.6338	4.9265	-28.7328		17.906	-6.4693	0.4273	-0.9539	-5.8923	0.0214	0.0259	-1.1897	4.606	-28.0977		17.891	-0.5306	-6.5758	-1.4739	0.1997	-6.3842
17.953	-4.8674	5.6699	0.4953	-1.7998	0.3357	-0.0202	-1.7607	3.6443	-25.5572		17.969	-0.0227	2.0705	0.1769	-0.0741	-0.6105	-0.0324	-3.0932	5.247	-23.6518		17.968	-0.9864	4.3397	2.7179	-0.0673	0.3237	0.1061	-1.38	4.7983	-29.0958		17.969	-6.5344	0.4143	-0.9604	-5.9588	0.0953	0.0235	-1.6973	3.9649	-29.0051		17.953	-0.5306	-6.6541	-1.4804	0.1963	-6.5319
18.015	-4.7893	5.683	0.4888	-1.7095	0.3271	-0.0178	-1.1897	4.4777	-24.4684		18.031	-0.0357	2.0053	0.1769	-0.0622	-0.6123	-0.0372	-2.1414	4.9265	-23.3796		18.031	-0.9734	4.3267	2.6724	-0.0605	0.3374	0.1134	-1.6338	4.9265	-28.3699		18.031	-6.6125	0.3882	-0.9669	-6.0746	0.0438	0.0235	-1.8242	4.8624	-29.1865		18.016	-0.5176	-6.7454	-1.4869	0.2082	-6.6504
18.078	-4.7241	5.6569	0.4823	-1.5971	0.3409	-0.0372	-0.9993	4.4136	-25.3757		18.094	-0.0227	1.9271	0.1769	-0.0877	-0.6208	-0.0275	-2.2683	4.9265	-23.4703		18.093	-0.9734	4.3267	2.6269	-0.0553	0.3495	0.1037	-1.5069	4.7983	-28.2792		18.094	-6.6907	0.3752	-0.9474	-6.2399	0.0558	0.0259	-0.9993	5.4394	-28.4606		18.078	-0.5566	-6.8106	-1.4934	0.2218	-6.7947
18.14	-4.646	5.6569	0.4693	-1.5136	0.322	-0.0445	-0.9359	4.8624	-24.4684		18.156	-0.0227	1.8488	0.1769	-0.0639	-0.6792	-0.0494	-2.2049	5.6317	-23.6518		18.156	-0.9864	4.3267	2.6075	-0.0792	0.3254	0.0867	-1.1262	4.4136	-28.6421		18.156	-6.7688	0.3752	-0.9799	-6.3472	0.1022	0.0478	-0.9359	5.5035	-28.9143		18.141	-0.5566	-6.8888	-1.5064	0.2201	-6.9853
18.203	-4.5809	5.6308	0.4693	-1.3927	0.3546	-0.0178	-1.6973	4.4777	-25.0128		18.219	-0.0096	1.7706	0.1769	-0.0673	-0.7514	-0.0348	-2.078	5.247	-24.1054		18.218	-0.9603	4.3267	2.5685	-0.0673	0.3374	0.1037	-1.38	4.6701	-28.7328		18.219	-6.847	0.336	-0.9669	-6.4341	0.0317	0.0259	-1.5069	5.0547	-29.5495		18.203	-0.5827	-6.9801	-1.5129	0.1673	-7.1072
18.265	-4.5027	5.6047	0.4498	-1.2461	0.334	-0.0348	-1.5069	3.5161	-25.285		18.281	-0.0227	1.6793	0.1834	-0.0758	-0.8218	-0.047	-3.2835	4.5419	-24.4684		18.281	-0.9603	4.3397	2.523	-0.0264	0.3168	0.0891	-1.1262	4.2854	-29.0051		18.281	-6.9251	0.31	-0.9799	-6.5261	0.0592	0.0284	-1.8876	4.4136	-29.2773		18.266	-0.5827	-7.0453	-1.5259	0.2184	-7.2995
18.328	-4.4246	5.6047	0.4368	-1.1797	0.3391	-0.0421	-1.7607	4.3495	-25.1035		18.344	-0.0227	1.601	0.1769	-0.057	-0.9094	-0.0445	-3.9815	4.8624	-24.1054		18.343	-0.9603	4.3267	2.484	-0.0639	0.3306	0.1086	-0.8724	5.0547	-29.1865		18.344	-7.0163	0.2969	-0.9799	-6.5584	0.0541	0.0308	-1.5704	4.4777	-29.368		18.328	-0.6217	-7.1105	-1.5323	0.2065	-7.3768
18.39	-4.3725	5.5525	0.4368	-1.0434	0.3495	-0.0251	-1.3166	3.3238	-24.8313		18.406	-0.0357	1.5489	0.1899	-0.0996	-0.9111	-0.0348	-3.2835	4.7983	-25.1942		18.406	-0.9603	4.3136	2.432	-0.0468	0.3374	0.0964	-1.8876	4.9265	-28.3699		18.406	-7.0944	0.2708	-0.9864	-6.7577	0.0386	0.0454	-0.9993	5.5676	-28.9143		18.391	-0.6348	-7.2148	-1.5453	0.1861	-7.4936
18.453	-4.2813	5.5395	0.4238	-0.9651	0.346	-0.0348	-1.0628	3.8367	-25.3757		18.469	-0.0227	1.4576	0.1834	-0.0843	-0.9197	-0.0445	-3.0297	5.0547	-24.8313		18.468	-0.9603	4.3136	2.406	-0.0417	0.322	0.0648	-1.8876	4.7983	-29.4587		18.469	-7.1465	0.2317	-0.9929	-6.848	0.0919	0.0332	-1.6973	4.7342	-28.9143		18.453	-0.6608	-7.267	-1.5518	0.2235	-7.631
18.515	-4.2162	5.5265	0.4173	-0.8748	0.3546	-0.0129	-1.1897	3.7084	-24.1962		18.531	-0.0227	1.3793	0.1834	-0.0707	-0.9712	-0.0445	-2.2683	4.9265	-25.8294		18.531	-0.9603	4.3136	2.367	-0.0536	0.334	0.077	-1.5704	4.7342	-28.9143		18.531	-7.2507	0.2056	-0.9994	-6.9911	0.085	0.0357	-1.5704	5.7599	-27.8255		18.516	-0.6738	-7.3453	-1.5583	0.2201	-7.6653
18.578	-4.1381	5.5004	0.4043	-0.822	0.3357	-0.0178	-1.1897	3.9649	-25.5572		18.594	-0.0227	1.3011	0.1899	-0.0945	-1.0777	-0.0372	-2.7125	5.1188	-25.285		18.593	-0.9343	4.3136	2.328	-0.0707	0.334	0.0697	-0.9993	4.7983	-29.2773		18.594	-7.3158	0.1926	-0.9994	-7.0712	0.0214	0.0235	-1.6973	4.9906	-28.4606		18.578	-0.6738	-7.3844	-1.5518	0.2014	-7.4438
18.64	-4.0599	5.4613	0.3913	-0.7112	0.3271	-0.0227	-1.5069	4.1572	-24.5591		18.656	-0.0227	1.2359	0.1834	-0.1303	-1.1515	-0.0275	-2.4587	4.3495	-25.7386		18.656	-0.9343	4.3267	2.2955	-0.0315	0.3357	0.0843	-0.6821	4.9906	-28.6421		18.656	-7.407	0.1404	-0.9929	-7.1683	0.1125	0.0527	-1.38	5.3111	-27.9162		18.641	-0.6869	-7.3713	-1.5648	0.1435	-6.9423
18.703	-3.9818	5.4352	0.3653	-0.6601	0.3477	-0.0227	-1.0628	3.9649	-24.6498		18.719	-0.0227	1.1446	0.1899	-0.1099	-1.2408	-0.03	-3.1566	4.5419	-25.7386		18.718	-0.9213	4.3267	2.2305	-0.0605	0.3477	0.0648	-1.1262	4.4136	-29.0051		18.719	-7.4591	0.1404	-0.9994	-7.2637	0.0403	0.0502	-1.9511	5.247	-28.5514		18.703	-0.6999	-7.3453	-1.5583	0.1264	-6.4684
18.765	-3.9167	5.4221	0.3458	-0.5443	0.3374	-0.0445	-1.6338	4.029	-23.8332		18.781	-0.0227	1.0272	0.1834	-0.0945	-1.2769	-0.0348	-2.7759	4.2854	-26.4645		18.781	-0.9213	4.3006	2.198	-0.0707	0.3306	0.0502	-1.2531	4.5419	-29.8217		18.781	-7.5242	0.1274	-1.0124	-7.4034	0.1022	0.0284	-2.078	5.7599	-27.7348		18.766	-0.6869	-7.2801	-1.5453	0.106	-6.2898
18.828	-3.8516	5.383	0.3133	-0.5102	0.3512	-0.0348	-1.1897	3.8367	-24.1054		18.844	-0.0096	0.962	0.1834	-0.1099	-1.3507	-0.0421	-2.9663	5.1188	-26.646		18.843	-0.9213	4.3267	2.159	-0.0485	0.322	0.0454	-1.38	5.1829	-28.8236		18.844	-7.6153	0.1143	-1.0124	-7.5414	0.097	0.0381	-1.1897	5.8881	-28.0977		18.828	-0.6869	-7.1888	-1.5259	0.1043	-5.9308
18.89	-3.7864	5.37	0.2938	-0.4352	0.3306	-0.0518	-1.8242	3.8367	-24.1054		18.906	-0.0227	0.8838	0.1834	-0.1184	-1.4142	-0.0324	-2.9028	4.1572	-26.646		18.906	-0.9213	4.3136	2.1135	-0.0315	0.3151	0.0527	-0.9993	4.7983	-28.8236		18.906	-7.6935	0.0752	-1.0189	-7.6317	0.0541	0.0308	-1.9511	6.1446	-28.5514		18.891	-0.6999	-7.1236	-1.5194	0.1077	-5.4053
18.953	-3.6953	5.3569	0.2743	-0.4012	0.3374	-0.0275	-1.3166	3.7084	-23.8332		18.969	-0.0227	0.7925	0.1769	-0.103	-1.5121	-0.047	-3.5373	4.2854	-27.2811		18.968	-0.9213	4.3136	2.081	-0.0434	0.3409	0.0502	-0.7455	4.9265	-29.5495		18.969	-7.7456	0.0491	-1.0319	-7.417	0.0609	0.0405	-1.4435	3.0674	-27.644		18.953	-0.6999	-7.0714	-1.4999	0.0464	-5.1821
19.015	-3.6171	5.3439	0.2613	-0.3875	0.3374	-0.0275	-0.9993	4.4136	-23.561		19.031	-0.0357	0.7403	0.1704	-0.1371	-1.5877	-0.0178	-3.2835	4.2854	-26.1923		19.031	-0.9083	4.3136	2.042	-0.0247	0.3426	0.0381	-1.5704	4.9906	-29.7309		19.031	-7.7716	-0.003	-1.0384	-7.153	-0.0129	0.043	-1.1897	2.1699	-27.5533		19.016	-0.6869	-6.9801	-1.4869	0.0481	-5.0739
19.078	-3.526	5.3308	0.2224	-0.3364	0.3477	-0.0397	-2.0145	4.9265	-24.2869		19.094	-0.0096	0.6751	0.1704	-0.1507	-1.6736	-0.03	-3.7277	4.3495	-26.646		19.093	-0.8952	4.3136	2.0031	-0.0639	0.3134	0.0381	-1.5704	5.3753	-28.8236		19.094	-7.7456	-0.0291	-1.0384	-6.722	0.0266	0.0357	-0.9993	1.9775	-22.6537		19.078	-0.6869	-6.8888	-1.4609	0.0361	-4.7287
19.14	-3.4348	5.3048	0.1964	-0.3058	0.3271	-0.0251	-1.8876	4.1572	-23.6518		19.156	-0.0096	0.5838	0.1509	-0.1303	-1.7457	-0.0324	-3.7911	3.9008	-27.3718		19.156	-0.9083	4.3267	1.9641	-0.0315	0.322	0.0357	-1.5069	4.7983	-29.0958		19.156	-7.6805	-0.0552	-1.0449	-6.4971	-0.0455	0.0016	-0.4917	3.3879	-20.839		19.141	-0.6869	-6.8106	-1.4544	0.0259	-4.4093
19.203	-3.3567	5.3048	0.1509	-0.253	0.3529	-0.0275	-2.2049	3.3238	-23.561		19.219	0.0034	0.4925	0.1444	-0.1456	-1.7989	-0.0081	-3.7911	4.2854	-27.5533		19.218	-0.8952	4.3267	1.9251	-0.0332	0.334	0.0454	-1.5704	4.7342	-29.1865		19.219	-7.6153	-0.0552	-1.0449	-6.6487	0.0077	0.0381	-0.0476	6.0163	-18.2985		19.203	-0.6738	-6.7454	-1.4284	0.0395	-4.1414
19.265	-3.2785	5.2787	0.1119	-0.1695	0.3237	-0.03	-2.078	2.8109	-22.9259		19.281	0.0294	0.4143	0.1314	-0.1695	-1.902	-0.0421	-3.347	3.9649	-27.5533		19.281	-0.8952	4.3267	1.8861	-0.0468	0.3203	0.0357	-1.4435	4.7342	-29.5495		19.281	-7.5372	-0.0552	-1.0449	-6.1462	-0.0009	0.0235	-0.238	3.6443	-17.4819		19.266	-0.6608	-6.6541	-1.4219	0.0498	-4.0315
19.328	-3.2134	5.2396	0.0534	-0.1473	0.3666	-0.0275	-1.1897	3.0674	-23.1074		19.344	0.0425	0.323	0.1314	-0.149	-1.9707	-0.0348	-3.6008	4.606	-27.9162		19.343	-0.8822	4.3136	1.8471	-0.0383	0.3288	0.0502	-0.8724	4.7983	-29.1865		19.344	-7.4851	-0.0682	-1.0449	-5.7203	-0.0181	0.0211	0.0793	-0.2663	-17.8448		19.328	-0.6348	-6.5889	-1.3959	0.0259	-3.8735
19.39	-3.1353	5.2135	0.0274	-0.115	0.3512	-0.0251	-1.2531	2.6186	-23.924		19.406	0.0685	0.2708	0.1249	-0.1184	-2.06	-0.03	-3.7911	4.1572	-28.4606		19.406	-0.8952	4.3267	1.8016	-0.0264	0.3168	0.0332	-1.8876	5.1829	-29.1865		19.406	-7.42	-0.0552	-1.0579	-5.492	-0.0112	0.0235	0.1427	0.4389	-15.7579		19.391	-0.6348	-6.4976	-1.3829	0.0242	-3.8099
19.453	-3.0311	5.1744	-0.0116	-0.1167	0.3288	-0.0081	-1.6973	3.7084	-23.924		19.469	0.1076	0.1926	0.1054	-0.1184	-2.1561	-0.0251	-3.7277	4.7342	-28.2792		19.468	-0.8692	4.3267	1.7431	-0.0519	0.3254	0.0502	-1.0628	4.8624	-29.4587		19.469	-7.3549	-0.0552	-1.0644	-5.4835	-0.0473	0.0114	0.2062	3.0674	-15.2135		19.453	-0.6217	-6.4324	-1.3634	0.0412	-3.6519
19.515	-2.966	5.1091	-0.0441	-0.0894	0.3357	-0.0348	-1.8242	3.452	-23.924		19.531	0.1336	0.1143	0.1184	-0.0877	-2.266	-0.0324	-3.7277	4.4777	-28.0977		19.531	-0.8562	4.3136	1.7236	-0.0349	0.3323	0.0259	-1.1897	4.606	-28.6421		19.531	-7.2637	-0.0552	-1.0644	-5.2603	0.006	0.0332	0.0793	2.6827	-13.7618		19.516	-0.6087	-6.3411	-1.3504	0.0395	-3.4716
19.578	-2.8878	5.07	-0.0831	-0.0792	0.3426	-0.0324	-1.8876	3.3879	-23.4703		19.594	0.1597	-0.0161	0.1054	-0.0945	-2.2935	-0.0421	-3.2201	4.7342	-28.6421		19.593	-0.8822	4.3136	1.6846	-0.0264	0.3409	0.043	-1.2531	4.7983	-29.9124		19.594	-7.1856	-0.0291	-1.0514	-4.9792	-0.0163	0.0259	0.3331	0.8877	-14.9413		19.578	-0.6087	-6.2759	-1.3374	0.0021	-3.3239
19.64	-2.8097	5.0048	-0.1221	-0.0707	0.31	-0.0324	-2.2049	3.8367	-23.3796		19.656	0.1727	-0.0552	0.0924	-0.1286	-2.3622	-0.0154	-3.0297	4.7983	-28.6421		19.656	-0.8562	4.3267	1.6391	-0.0434	0.3237	0.0016	-1.3166	5.247	-29.2773		19.656	-7.1205	-0.0422	-1.0644	-4.7918	-0.0335	0.0211	0.5869	1.657	-15.1228		19.641	-0.6087	-6.1846	-1.3244	0.0038	-3.226
19.703	-2.7315	4.9527	-0.1546	-0.0179	0.3391	-0.03	-1.0628	3.0674	-23.2888		19.719	0.1857	-0.1465	0.0924	-0.1593	-2.4893	-0.0154	-3.7277	3.8367	-29.4587		19.718	-0.8692	4.3267	1.6066	-0.0315	0.3288	-0.0008	-1.6973	5.3753	-29.368		19.719	-7.0553	-0.0161	-1.0514	-4.6538	0.006	0.0357	0.2062	0.3748	-14.4877		19.703	-0.6217	-6.0933	-1.3114	-0.003	-3.1024
19.765	-2.6534	4.8874	-0.1871	-0.0128	0.3237	-0.047	-1.8876	2.7468	-22.7444		19.781	0.1857	-0.2117	0.0859	-0.1814	-2.6799	-0.0178	-3.4739	4.2213	-29.6402		19.781	-0.8562	4.3136	1.5676	-0.0468	0.3237	0.0284	-0.238	5.3111	-29.8217		19.781	-6.9772	0.0361	-1.0579	-4.4886	0.0317	0.0308	-0.0476	1.0159	-13.3081		19.766	-0.6087	-6.0281	-1.3049	0.0021	-3.0114
19.828	-2.5622	4.7962	-0.2261	-0.0196	0.3031	-0.0227	-1.0628	3.0674	-22.8352		19.844	0.1857	-0.303	0.0794	-0.1899	-2.7641	-0.0178	-4.1084	4.7342	-29.9124		19.843	-0.8562	4.3006	1.5286	-0.0434	0.3203	0.0016	-2.1414	5.1829	-28.6421		19.844	-6.8991	0.0752	-1.0579	-4.4068	0.018	0.0211	-0.1745	2.4263	-13.3989		19.828	-0.5957	-5.9498	-1.2919	-0.0099	-2.9066
19.89	-2.4841	4.744	-0.2521	-0.0008	0.3185	-0.0445	-1.6338	3.1315	-22.0186		19.906	0.2118	-0.3812	0.0729	-0.195	-2.8688	-0.0275	-3.6008	4.2213	-29.6402		19.906	-0.8562	4.3006	1.4961	-0.0145	0.3288	0.0041	-1.0628	4.7342	-29.1865		19.906	-6.8079	0.1013	-1.0579	-4.3233	0.0094	-0.0032	-0.238	2.6186	-13.3989		19.891	-0.5827	-5.8716	-1.2854	-0.0167	-2.807
19.953	-2.406	4.6788	-0.2651	0.0213	0.31	-0.0445	-1.3166	3.0674	-22.6537		19.969	0.2248	-0.4334	0.0599	-0.1865	-2.9392	-0.0154	-3.6642	4.2854	-29.368		19.968	-0.8431	4.3267	1.4506	-0.0366	0.3306	-0.0008	-1.4435	5.3753	-29.9124		19.969	-6.7428	0.1535	-1.0579	-4.1308	0.018	0.0332	-0.4283	1.7852	-13.2174		19.953	-0.5957	-5.7933	-1.2789	0.014	-2.7246
20.015	-2.3278	4.6136	-0.2846	0.0537	0.346	-0.0202	-1.1262	3.1315	-22.9259		20.031	0.2639	-0.5247	0.0534	-0.2053	-3.0577	-0.0202	-3.6642	3.7726	-30.4568		20.031	-0.8562	4.3006	1.4117	-0.0519	0.3529	0.0065	-0.9993	4.7983	-30.2753		20.031	-6.6777	0.1665	-1.0644	-3.923	0.0386	0.043	0.0158	0.3107	-14.4877		20.016	-0.5957	-5.7021	-1.2594	0.0225	-2.6782
20.078	-2.2367	4.5614	-0.2976	0.0315	0.3306	-0.0275	-1.5704	2.8109	-22.563		20.094	0.2899	-0.5899	0.0404	-0.1967	-3.1247	-0.0105	-3.5373	3.5161	-30.6383		20.093	-0.8301	4.3136	1.3727	-0.0366	0.3168	-0.0081	-1.7607	5.1829	-29.1865		20.094	-6.6125	0.2056	-1.0579	-3.8463	0.0541	-0.0008	0.0158	0.9518	-13.3989		20.078	-0.6087	-5.6238	-1.2594	-0.0201	-2.5631
20.14	-2.1585	4.5353	-0.3041	0.0537	0.2842	-0.047	-1.6973	4.2213	-22.8352		20.156	0.316	-0.6812	0.0339	-0.1695	-3.293	-0.0105	-3.1566	4.1572	-31.4549		20.156	-0.8301	4.3136	1.3402	-0.04	0.3134	-0.0105	-1.5069	4.5419	-29.6402		20.156	-6.5214	0.2187	-1.0514	-3.7015	0.018	0.0211	-0.1111	1.08	-13.7618		20.141	-0.6087	-5.5456	-1.2464	-0.0235	-2.4738
20.203	-2.0804	4.5092	-0.2976	0.0605	0.322	-0.0348	-1.9511	3.5802	-21.7464		20.219	0.355	-0.7594	0.0079	-0.1712	-3.4527	-0.0129	-3.6008	4.0931	-31.0012		20.218	-0.8171	4.3136	1.3012	-0.0417	0.3254	-0.0057	-0.9359	5.247	-28.9143		20.219	-6.4432	0.2187	-1.0579	-3.5823	-0.0163	0.0381	0.0158	1.4647	-13.2174		20.203	-0.5957	-5.4804	-1.2399	-0.0099	-2.4223
20.265	-2.0022	4.4962	-0.2976	0.0843	0.3151	-0.03	-2.078	3.452	-23.1074		20.281	0.3811	-0.8507	0.0079	-0.1525	-3.554	-0.0057	-3.5373	3.9008	-31.2734		20.281	-0.8301	4.3136	1.2622	-0.04	0.3374	-0.0057	-0.5552	4.9906	-29.2773		20.281	-6.3781	0.2187	-1.0579	-3.4954	0.03	0.0405	-0.238	1.08	-13.7618		20.266	-0.5827	-5.3891	-1.2399	0.0089	-2.3244
20.328	-1.9111	4.5092	-0.3431	0.0792	0.3306	-0.0445	-1.5069	2.7468	-22.4722		20.344	0.3941	-0.9029	-0.0051	-0.1593	-3.633	-0.0178	-3.6642	3.9008	-31.1827		20.343	-0.8171	4.3006	1.2232	-0.0298	0.334	0.0138	-0.9359	4.8624	-29.8217		20.344	-6.3	0.2317	-1.0514	-3.2416	-0.006	0.0016	0.2696	0.5672	-12.7637		20.328	-0.5957	-5.2978	-1.2269	-0.0303	-2.3021
20.39	-1.8329	4.4962	-0.3625	0.1286	0.3323	-0.0397	-1.8876	2.875	-21.5649		20.406	0.4071	-1.0072	-0.0181	-0.2053	-3.8305	-0.0129	-3.0932	3.7084	-30.8197		20.406	-0.8171	4.3136	1.1842	-0.0315	0.322	-0.0057	-0.6186	4.7983	-29.6402		20.406	-6.2349	0.2448	-1.0514	-3.199	-0.0284	0.0041	0.2062	0.3748	-12.673		20.391	-0.5827	-5.2195	-1.2204	-0.0013	-2.2145
20.453	-1.7418	4.4701	-0.369	0.1372	0.3168	-0.0251	-0.9993	2.875	-22.563		20.469	0.4201	-1.0594	-0.0311	-0.2683	-3.925	-0.0227	-3.1566	3.6443	-30.8197		20.468	-0.778	4.2875	1.1452	-0.0281	0.3082	-0.0202	-0.6186	5.0547	-29.2773		20.469	-6.1567	0.2578	-1.0644	-3.0525	-0.0078	0.0162	0.1427	0.1825	-13.0359		20.453	-0.5957	-5.1413	-1.2009	-0.0201	-2.1853
20.515	-1.6506	4.4832	-0.3885	0.1167	0.3168	-0.0348	-1.2531	2.7468	-21.9278		20.531	0.4332	-1.1507	-0.0376	-0.224	-4.1002	-0.0154	-3.0932	2.6827	-31.6363		20.531	-0.8041	4.3006	1.0997	-0.0366	0.3168	-0.0008	-0.6821	5.7599	-29.6402		20.531	-6.0916	0.2969	-1.0514	-2.9707	0.006	0.0235	0.7138	1.0159	-11.5842		20.516	-0.5957	-5.063	-1.2009	-0.0116	-2.0909
20.578	-1.5855	4.4701	-0.3885	0.1235	0.3271	-0.0324	-0.9359	3.452	-22.3815		20.594	0.4462	-1.2289	-0.0441	-0.2291	-4.2187	0.0162	-3.347	3.1956	-31.7271		20.593	-0.791	4.3006	1.0542	-0.0349	0.3426	-0.0421	-1.2531	5.0547	-29.4587		20.594	-6.0135	0.323	-1.0579	-2.9281	0.0386	0.0259	0.2062	0.8877	-12.2193		20.578	-0.5827	-4.9978	-1.1944	-0.015	-2.0531
20.64	-1.5073	4.4962	-0.395	0.0929	0.3306	-0.0275	-1.9511	3.452	-22.4722		20.656	0.4592	-1.3202	-0.0636	-0.2274	-4.3578	0.0138	-2.5221	3.5161	-31.1827		20.656	-0.8041	4.2875	1.0217	-0.04	0.334	-0.0178	-0.1111	5.1829	-28.3699		20.656	-5.9223	0.3621	-1.0644	-2.7697	0.0335	0.0187	0.46	1.657	-12.4915		20.641	-0.5957	-4.9196	-1.1944	-0.0235	-1.9415
20.703	-1.4292	4.4832	-0.3885	0.1048	0.3391	-0.0275	-0.9359	2.9392	-22.1093		20.719	0.4853	-1.3854	-0.0766	-0.2342	-4.4608	-0.0154	-2.9663	3.9649	-31.3641		20.718	-0.791	4.3006	0.9762	-0.0485	0.3357	-0.0154	-0.6186	5.1829	-29.5495		20.719	-5.8572	0.3882	-1.0449	-2.6266	-0.0009	-0.0008	0.0158	0.1825	-13.2174		20.703	-0.5827	-4.8413	-1.1814	-0.0184	-1.902
20.765	-1.325	4.4701	-0.3755	0.1423	0.3323	-0.03	-1.1897	3.1956	-22.4722		20.781	0.5243	-1.4506	-0.0961	-0.1967	-4.5947	-0.0057	-3.5373	3.2597	-32.09		20.781	-0.778	4.3136	0.9437	-0.0332	0.3168	-0.0275	-0.8724	4.9265	-29.0051		20.781	-5.753	0.4273	-1.0449	-2.5567	0.0524	0.0235	0.5234	0.4389	-11.6749		20.766	-0.5696	-4.737	-1.1814	-0.0303	-1.8865
20.828	-1.2729	4.4832	-0.382	0.1303	0.3306	-0.0348	-1.2531	3.1315	-22.1093		20.844	0.5243	-1.5419	-0.1091	-0.1797	-4.7356	-0.0275	-4.4256	3.1315	-31.8178		20.843	-0.791	4.3136	0.8982	-0.0298	0.3443	-0.0154	-0.809	4.9906	-29.0958		20.844	-5.6879	0.4404	-1.0579	-2.5039	0.0232	0.0114	0.46	0.3748	-11.4027		20.828	-0.5827	-4.6588	-1.1684	-0.0337	-1.8693
20.89	-1.1687	4.4832	-0.382	0.1763	0.3288	-0.0275	-0.4917	2.4904	-22.0186		20.906	0.5764	-1.6201	-0.1091	-0.1848	-4.9228	0.0114	-4.2353	3.9649	-32.2715		20.906	-0.778	4.3136	0.8722	-0.0502	0.3443	-0.0154	-0.238	5.3111	-29.368		20.906	-5.6097	0.4795	-1.0384	-2.4272	0.042	0.0016	0.46	0.8877	-12.2193		20.891	-0.5827	-4.5936	-1.1619	-0.0422	-1.8024
20.953	-1.0906	4.4701	-0.408	0.19	0.3426	-0.0251	-0.8724	2.875	-21.9278		20.969	0.6025	-1.6854	-0.1221	-0.1865	-5.0859	-0.0154	-3.8546	2.9392	-31.9993		20.968	-0.778	4.3006	0.8203	-0.0196	0.3374	-0.0421	-1.0628	4.8624	-29.7309		20.969	-5.5186	0.4925	-1.0254	-2.3267	0.0438	0.0138	0.8407	0.8877	-12.5823		20.953	-0.5696	-4.4892	-1.1554	-0.0456	-1.6925
21.015	-0.9864	4.4832	-0.4145	0.1763	0.322	-0.047	-1.1897	2.2981	-21.7464		21.031	0.6155	-1.7506	-0.1416	-0.207	-5.1752	-0.0008	-3.8546	3.0674	-31.8178		21.031	-0.778	4.3006	0.7813	-0.04	0.3409	-0.0348	-0.9359	5.247	-28.6421		21.031	-5.4535	0.5186	-1.0319	-2.153	0.0335	0.0187	0.5234	0.1825	-11.9471		21.016	-0.5566	-4.4371	-1.1554	-0.0303	-1.5877
21.078	-0.9083	4.4832	-0.4145	0.1729	0.3426	-0.0202	-0.9359	2.5545	-22.0186		21.094	0.6155	-1.8549	-0.1481	-0.241	-5.3263	0.0162	-3.7277	3.0674	-32.1807		21.093	-0.765	4.3136	0.7423	-0.0519	0.3529	-0.0251	-0.7455	5.0547	-29.0958		21.094	-5.4014	0.5447	-1.0319	-2.107	0.0317	0.0211	0.5234	0.4389	-10.9491		21.078	-0.5827	-4.3458	-1.1489	-0.0337	-1.5705
21.14	-0.8301	4.4832	-0.3885	0.1303	0.3374	-0.0275	-1.9511	3.7084	-21.2927		21.156	0.6415	-1.9201	-0.1611	-0.253	-5.4551	-0.0081	-3.7277	2.6827	-32.5437		21.156	-0.765	4.3006	0.6968	-0.023	0.3306	-0.047	-1.4435	5.247	-28.9143		21.156	-5.3232	0.5577	-1.0254	-1.9928	0.0232	0.0187	0.6503	-0.2021	-11.7657		21.141	-0.5436	-4.2545	-1.1424	-0.0235	-1.5705
21.203	-0.765	4.4832	-0.382	0.1355	0.3426	-0.047	-1.5704	3.1956	-21.9278		21.219	0.6415	-1.9983	-0.1676	-0.2547	-5.608	0.0041	-3.5373	3.0033	-32.6344		21.218	-0.778	4.3136	0.6643	-0.04	0.3271	-0.0421	-0.4917	5.0547	-29.5495		21.219	-5.2581	0.5708	-1.0189	-1.9536	0.0489	0.0162	0.3331	0.503	-11.7657		21.203	-0.5436	-4.1762	-1.1294	-0.0644	-1.5499
21.265	-0.6738	4.4701	-0.3755	0.1661	0.3254	-0.0494	-0.809	2.5545	-21.7464		21.281	0.6676	-2.0766	-0.1871	-0.2581	-5.7625	0.0089	-3.7277	3.452	-32.7251		21.281	-0.765	4.3136	0.6188	-0.0536	0.3203	-0.0445	-0.7455	5.9522	-29.6402		21.281	-5.1539	0.5708	-1.0124	-1.8753	0.0283	0.0138	1.4752	0.503	-11.5842		21.266	-0.5566	-4.111	-1.1229	-0.0593	-1.4452
21.328	-0.5957	4.4701	-0.3755	0.2053	0.3237	-0.0397	-1.38	2.875	-21.2927		21.344	0.6676	-2.1679	-0.1936	-0.2496	-5.881	-0.0154	-4.9332	3.0033	-32.9973		21.343	-0.765	4.2875	0.5798	-0.0315	0.3323	-0.0494	-0.9993	4.9265	-29.0051		21.344	-5.0888	0.5838	-1.0059	-1.756	0.073	0.0259	0.8407	0.3748	-12.2193		21.328	-0.5176	-4.0067	-1.1229	-0.0286	-1.3593
21.39	-0.5045	4.4832	-0.4015	0.2496	0.3409	-0.0421	-1.3166	2.5545	-22.0186		21.406	0.6936	-2.2331	-0.2066	-0.2479	-5.9927	-0.0105	-4.4891	3.5802	-32.2715		21.406	-0.765	4.3006	0.5408	-0.0485	0.3357	-0.0445	-0.9359	5.1188	-29.5495		21.406	-5.0107	0.5838	-1.0059	-1.6794	0.0403	0.0332	0.9676	-0.0098	-11.4935		21.391	-0.5176	-3.9154	-1.1099	-0.0252	-1.349
21.453	-0.4524	4.4832	-0.421	0.2394	0.3409	-0.0324	-1.0628	2.4263	-21.5649		21.469	0.7067	-2.3113	-0.2131	-0.2359	-6.1318	0.0114	-3.2201	3.452	-32.9066		21.468	-0.752	4.3006	0.4953	-0.0519	0.3323	-0.0397	-1.5704	5.247	-29.0958		21.469	-4.9325	0.5969	-1.0059	-1.5993	0.0317	0.0259	1.3483	-0.0098	-11.312		21.453	-0.5176	-3.8632	-1.1034	-0.0371	-1.2958
21.515	-0.3482	4.4701	-0.421	0.178	0.3203	-0.0227	-1.1262	3.1315	-21.5649		21.531	0.7718	-2.4157	-0.2326	-0.1848	-6.276	0.0089	-3.8546	3.3238	-32.6344		21.531	-0.752	4.3006	0.4628	-0.0536	0.3271	-0.0494	-1.3166	5.3753	-28.2792		21.531	-4.8413	0.623	-0.9994	-1.5226	0.0644	0.0332	1.2214	-0.138	-11.4027		21.516	-0.5306	-3.785	-1.0904	-0.049	-1.2906
21.578	-0.2831	4.4701	-0.3885	0.1763	0.3391	-0.0397	-1.1897	3.1956	-21.202		21.594	0.7848	-2.4548	-0.2521	-0.2121	-6.3928	-0.0081	-3.4739	3.452	-32.7251		21.593	-0.739	4.3136	0.4303	-0.0451	0.3254	-0.0591	-0.809	5.5035	-28.4606		21.594	-4.7762	0.649	-0.9929	-1.4971	0.0317	0.0138	0.9041	0.1825	-11.2213		21.578	-0.5045	-3.6807	-1.0839	-0.0525	-1.2459
21.64	-0.192	4.4701	-0.356	0.1883	0.334	-0.0348	-1.6338	3.7726	-21.5649		21.656	0.7978	-2.5591	-0.2456	-0.2172	-6.5353	0.0089	-4.6794	3.2597	-32.09		21.656	-0.752	4.3267	0.3848	-0.0298	0.3306	-0.0591	-1.3166	5.6317	-28.6421		21.656	-4.6981	0.6882	-0.9929	-1.4187	0.042	0.0308	1.4117	0.4389	-11.6749		21.641	-0.4785	-3.6155	-1.0644	-0.0201	-1.1584
21.703	-0.1268	4.4962	-0.3301	0.1678	0.334	-0.0348	-1.4435	2.9392	-21.7464		21.719	0.8239	-2.6113	-0.2651	-0.2598	-6.8187	0.0065	-5.2504	3.1956	-32.9066		21.718	-0.739	4.3006	0.3458	-0.0553	0.322	-0.0713	-1.8876	4.606	-28.7328		21.719	-4.6199	0.7012	-0.9929	-1.3404	0.0798	0.0162	0.2062	0.2466	-11.4027		21.703	-0.4915	-3.5372	-1.0709	-0.0388	-1.1223
21.765	-0.0357	4.4832	-0.3236	0.2394	0.3512	-0.0372	-1.2531	2.6827	-21.8371		21.781	0.8499	-2.6895	-0.2781	-0.2904	-6.9217	0.0162	-4.2987	3.0033	-33.2695		21.781	-0.739	4.3136	0.3068	-0.0434	0.3477	-0.0616	-0.9993	5.0547	-28.9143		21.781	-4.5288	0.7273	-0.9864	-1.2739	0.0266	0.0211	0.8407	0.6313	-10.5861		21.766	-0.5045	-3.459	-1.0644	-0.0559	-1.0639
21.828	0.0685	4.4701	-0.3366	0.282	0.3426	-0.03	-1.0628	2.9392	-22.1093		21.844	0.8369	-2.7678	-0.2846	-0.2921	-7.0059	0.0089	-3.9815	3.0674	-32.9973		21.843	-0.739	4.3006	0.2743	-0.0519	0.3185	-0.0786	-1.7607	5.1829	-28.007		21.844	-4.4637	0.7534	-0.9929	-1.2415	0.0936	0.0405	1.2214	0.2466	-11.2213		21.828	-0.4785	-3.3807	-1.0579	-0.032	-1.0502
21.89	0.1336	4.4571	-0.356	0.282	0.346	-0.0275	-0.7455	2.3622	-21.4742		21.906	0.8499	-2.846	-0.3106	-0.2615	-7.1673	0.0041	-4.3622	2.9392	-33.1788		21.906	-0.7259	4.3136	0.2289	-0.0536	0.334	-0.064	-0.9993	5.0547	-29.0051		21.906	-4.3855	0.7794	-0.9929	-1.1717	0.0712	0.0187	0.46	0.2466	-9.8603		21.891	-0.4785	-3.3025	-1.0384	-0.0525	-1.0364
21.953	0.2248	4.4832	-0.356	0.2751	0.3426	-0.047	-1.8242	2.8109	-21.4742		21.969	0.876	-2.9504	-0.3041	-0.2444	-7.3356	0.0016	-5.0601	3.9008	-33.3603		21.968	-0.7259	4.3006	0.2029	-0.0264	0.3306	-0.0737	-1.2531	5.0547	-28.4606		21.969	-4.3074	0.7925	-0.9799	-1.1002	0.0472	0.0211	1.2214	0.1184	-9.951		21.953	-0.4785	-3.2242	-1.0384	-0.0422	-0.9746
22.015	0.316	4.4832	-0.3431	0.2581	0.3151	-0.0421	-1.6973	2.9392	-21.2927		22.031	0.915	-3.0156	-0.3106	-0.2172	-7.4764	0.0187	-5.187	3.1315	-33.1788		22.031	-0.739	4.3136	0.1444	-0.0315	0.3082	-0.0859	-1.5069	4.7983	-27.9162		22.031	-4.2292	0.8055	-0.9864	-1.0439	0.0901	0.0114	0.3965	-0.4586	-10.1325		22.016	-0.4785	-3.146	-1.0319	-0.061	-0.9592
22.078	0.3811	4.4701	-0.3236	0.2479	0.322	-0.0445	-1.1262	3.0033	-21.4742		22.094	0.9411	-3.0938	-0.3301	-0.2087	-7.6293	-0.0105	-5.3773	3.1956	-33.9954		22.093	-0.7259	4.2875	0.1119	-0.0468	0.3082	-0.0883	-1.5704	5.3753	-27.7348		22.094	-4.1511	0.8186	-0.9929	-1.0082	0.0678	0.0332	1.2848	0.1825	-11.1305		22.078	-0.4785	-3.0808	-1.0254	-0.0542	-0.8767
22.14	0.4722	4.4701	-0.2781	0.2411	0.3117	-0.0348	-1.6973	3.8367	-21.4742		22.156	0.9541	-3.1851	-0.3431	-0.2274	-7.6791	0.0016	-3.9815	3.8367	-33.0881		22.156	-0.7129	4.3267	0.0664	-0.0264	0.334	-0.0859	-1.38	5.3111	-28.007		22.156	-4.073	0.8055	-0.9864	-0.9417	0.0867	0.0162	0.1427	-0.0739	-9.8603		22.141	-0.4785	-2.9764	-1.0124	-0.0661	-0.8647
22.203	0.5504	4.4571	-0.2586	0.2462	0.3306	-0.0445	-1.1897	3.5802	-21.5649		22.219	0.9671	-3.2112	-0.3495	-0.2427	-7.5056	0.0016	-2.7759	3.9008	-32.4529		22.218	-0.7129	4.3006	0.0079	-0.0519	0.3151	-0.0931	-1.0628	6.0163	-28.3699		22.219	-3.9818	0.8186	-0.9799	-0.9008	0.0901	0.0138	0.5869	0.1184	-10.7676		22.203	-0.4785	-2.9112	-1.0254	-0.0388	-0.7857
22.265	0.6155	4.4571	-0.2391	0.2786	0.3082	-0.0445	-0.9993	2.4904	-21.5649		22.281	0.9671	-3.2112	-0.3495	-0.1882	-7.0213	-0.0105	-0.6821	2.9392	-32.7251		22.281	-0.7129	4.3136	-0.0311	-0.0298	0.3203	-0.081	-0.8724	5.0547	-27.1904		22.281	-3.9167	0.8316	-0.9864	-0.8617	0.0541	0.0235	0.9041	0.9518	-9.8603		22.266	-0.4785	-2.8069	-1.0189	-0.0542	-0.7325
22.328	0.7067	4.4571	-0.2261	0.3041	0.3237	-0.0348	-1.5704	3.3238	-21.3834		22.344	0.9801	-3.1721	-0.3495	-0.1967	-6.6693	0.0041	-1.5069	4.1572	-31.1827		22.343	-0.7129	4.3136	-0.0571	-0.0417	0.3082	-0.1053	-0.9993	5.5676	-27.644		22.344	-3.8255	0.8577	-0.9799	-0.8225	0.1004	0.0187	0.2062	-0.6509	-10.9491		22.328	-0.4785	-2.7417	-1.0059	-0.0542	-0.7771
22.39	0.7587	4.4832	-0.2196	0.3569	0.3151	-0.0494	-1.1897	2.6827	-21.6556		22.406	0.9801	-3.0938	-0.3431	-0.1933	-6.5628	-0.0008	-3.918	4.4136	-29.2773		22.406	-0.6999	4.3136	-0.1026	-0.0196	0.3237	-0.1004	-0.8724	4.9265	-28.2792		22.406	-3.7604	0.8577	-0.9799	-0.7594	0.0644	0.0187	0.7772	0.0543	-10.2232		22.391	-0.4785	-2.6504	-0.9994	-0.0814	-0.7359
22.453	0.8629	4.4571	-0.2196	0.3944	0.3323	-0.0372	-1.0628	2.0416	-21.5649		22.469	0.9671	-3.0286	-0.3236	-0.1627	-6.1403	-0.0008	-3.4104	4.2854	-29.1865		22.468	-0.6869	4.3267	-0.1351	-0.0434	0.3306	-0.0931	-1.1897	5.1188	-27.3718		22.469	-3.6823	0.8577	-0.9929	-0.6913	0.0747	0.0162	0.7772	-0.5868	-10.4954		22.453	-0.4655	-2.5722	-0.9929	-0.0354	-0.7067
22.515	0.9541	4.4832	-0.1936	0.3944	0.3357	-0.03	-0.9993	2.234	-21.4742		22.531	0.9541	-2.9634	-0.3171	-0.1167	-5.7059	-0.0129	-1.8242	4.4777	-27.9162		22.531	-0.6738	4.3136	-0.1806	-0.0434	0.3134	-0.1053	-1.7607	5.1829	-27.0089		22.531	-3.6171	0.8707	-0.9864	-0.6436	0.0884	-0.0032	0.7138	0.2466	-9.6788		22.516	-0.4524	-2.507	-0.9864	-0.0678	-0.6123
22.578	1.0453	4.4701	-0.1741	0.3995	0.3168	-0.0275	-0.3014	2.6827	-22.0186		22.594	0.9671	-2.8851	-0.3106	-0.132	-5.5462	-0.0154	-2.0145	4.7983	-28.1884		22.593	-0.6999	4.3006	-0.2131	-0.0724	0.3323	-0.0786	-0.6821	5.3753	-27.644		22.594	-3.526	0.8838	-0.9864	-0.6453	0.0695	0.0187	0.5869	0.3748	-10.4047		22.578	-0.4524	-2.4287	-0.9864	-0.0456	-0.5762
22.64	1.1104	4.4571	-0.1351	0.4234	0.31	-0.0445	-1.1262	3.5161	-21.5649		22.656	0.9541	-2.8069	-0.2846	-0.0843	-5.1546	-0.0324	-0.8724	4.6701	-26.7367		22.656	-0.6869	4.3136	-0.2521	-0.0281	0.3323	-0.1175	-1.5069	5.0547	-26.9182		22.656	-3.4478	0.8838	-0.9864	-0.6112	0.0695	-0.0154	0.3965	0.1825	-10.2232		22.641	-0.4655	-2.3374	-0.9799	-0.0627	-0.5453
22.703	1.2015	4.4571	-0.1026	0.437	0.31	-0.0202	-0.6186	3.5161	-22.4722		22.719	0.9411	-2.7156	-0.2846	-0.1388	-4.9966	-0.0251	-1.2531	5.4394	-26.646		22.718	-0.6869	4.3006	-0.2846	-0.0366	0.334	-0.1053	-1.38	5.0547	-27.2811		22.719	-3.3697	0.8838	-0.9864	-0.5567	0.0798	0.0016	0.1427	0.4389	-11.312		22.703	-0.4524	-2.2722	-0.9734	-0.0525	-0.5659
22.765	1.2927	4.444	-0.0701	0.4864	0.2945	-0.0494	-0.809	2.4263	-22.2		22.781	0.915	-2.6504	-0.2586	-0.1184	-4.9657	-0.0397	-4.1084	5.8881	-25.8294		22.781	-0.6738	4.3136	-0.3366	-0.0434	0.3203	-0.1175	-1.6338	5.1829	-26.8274		22.781	-3.2785	0.8707	-0.9929	-0.5295	0.0627	0.0284	0.6503	0.8236	-10.2232		22.766	-0.4524	-2.194	-0.9669	-0.0814	-0.4817
22.828	1.3448	4.4701	-0.0571	0.4966	0.2945	-0.0324	-0.3648	2.875	-22.3815		22.844	0.915	-2.5591	-0.2391	-0.1082	-4.5638	-0.0105	-2.5856	5.1188	-26.1016		22.843	-0.6608	4.3136	-0.369	-0.0298	0.3134	-0.132	-0.8724	5.5676	-27.1904		22.844	-3.2134	0.8968	-0.9799	-0.4783	0.0627	0.0235	0.0793	0.2466	-10.0417		22.828	-0.4394	-2.1157	-0.9669	-0.0507	-0.444
22.89	1.449	4.4571	-0.0376	0.5682	0.2808	-0.0324	-0.3014	2.6827	-22.2		22.906	0.889	-2.533	-0.2326	-0.069	-4.2599	-0.0445	-0.9359	4.8624	-26.1016		22.906	-0.6738	4.3136	-0.4145	-0.0264	0.3271	-0.1077	-1.1262	5.6958	-27.0089		22.906	-3.1353	0.9099	-0.9799	-0.446	0.0678	0.0211	0.2062	-0.5227	-9.5881		22.891	-0.4655	-2.0375	-0.9539	-0.032	-0.4148
22.953	1.5011	4.4701	-0.0246	0.6022	0.2602	-0.0275	0.1427	2.3622	-22.9259		22.969	0.8629	-2.4417	-0.2196	-0.1013	-4.1345	-0.0105	-1.2531	5.0547	-26.0108		22.968	-0.6608	4.3006	-0.46	-0.0349	0.322	-0.1296	-1.1897	5.247	-27.0089		22.969	-3.0571	0.9099	-0.9799	-0.4426	0.0609	0.0162	-0.3014	0.2466	-9.5881		22.953	-0.4524	-1.9462	-0.9539	-0.0559	-0.3907
23.015	1.5923	4.444	-0.0116	0.6397	0.2636	-0.0421	-1.1262	2.6186	-22.4722		23.031	0.8369	-2.3635	-0.2066	-0.0877	-3.9078	-0.0227	-0.1745	4.9906	-24.0147		23.031	-0.6348	4.3528	-0.5055	-0.0417	0.3185	-0.1296	-1.2531	5.3111	-27.0996		23.031	-2.966	0.9099	-0.9864	-0.3727	0.073	-0.0008	1.031	-0.0739	-10.3139		23.016	-0.4524	-1.8679	-0.9474	-0.061	-0.4302
23.078	1.6834	4.4571	0.0079	0.655	0.2584	-0.0348	-0.238	2.875	-24.1054		23.094	0.7978	-2.2852	-0.2001	-0.1218	-3.7739	-0.0348	-1.4435	4.4777	-24.0147		23.093	-0.6348	4.3006	-0.538	-0.0315	0.3151	-0.1466	-1.3166	5.3753	-26.4645		23.094	-2.9008	0.9099	-0.9799	-0.3506	0.0781	0.043	-0.1111	-0.0739	-10.2232		23.078	-0.4524	-1.7766	-0.9409	-0.0695	-0.377
23.14	1.7616	4.4571	0.0209	0.6823	0.2344	-0.0421	-0.6821	2.9392	-23.1074		23.156	0.7718	-2.207	-0.1676	-0.103	-3.6863	-0.047	-1.9511	4.8624	-24.0147		23.156	-0.6608	4.3136	-0.5835	-0.0519	0.2979	-0.1539	-1.4435	5.1188	-25.7386		23.156	-2.8227	0.9229	-0.9864	-0.3676	0.0747	-0.0129	0.7772	-0.3304	-10.3139		23.141	-0.4394	-1.6854	-0.9345	-0.0303	-0.255
23.203	1.8397	4.4571	0.0339	0.7402	0.2035	-0.0397	-0.1111	3.1315	-24.0147		23.219	0.7457	-2.1288	-0.1676	-0.1542	-3.4596	-0.0324	-1.8876	5.1829	-23.561		23.218	-0.6348	4.3006	-0.629	-0.0588	0.3117	-0.1539	-1.7607	4.7983	-26.9182		23.219	-2.7576	0.9359	-0.9864	-0.2961	0.0987	0.0235	0.6503	-0.715	-9.4066		23.203	-0.4394	-1.6332	-0.9345	-0.0712	-0.1932
23.265	1.9309	4.4571	0.0339	0.7556	0.2121	-0.0372	-0.238	2.6186	-23.4703		23.281	0.7197	-2.0505	-0.1546	-0.0707	-3.2827	-0.0421	-1.6973	4.9906	-23.8332		23.281	-0.6348	4.3136	-0.668	-0.0485	0.3082	-0.1563	-1.5704	5.3753	-26.3738		23.281	-2.6534	0.9229	-0.9799	-0.2944	0.0592	0.0114	0.9041	-0.3304	-10.0417		23.266	-0.4394	-1.5289	-0.9215	-0.049	-0.2052
23.328	1.983	4.4571	0.0209	0.839	0.1726	-0.0421	-0.8724	3.3879	-23.6518		23.344	0.6936	-1.9592	-0.1351	-0.0792	-3.1539	-0.0275	-0.6186	5.5676	-23.3796		23.343	-0.6348	4.3267	-0.7005	-0.0553	0.3014	-0.1612	-1.8242	4.7342	-25.8294		23.344	-2.5753	0.9359	-0.9864	-0.2398	0.0867	0.0235	0.0158	0.0543	-10.0417		23.328	-0.4394	-1.4506	-0.915	-0.0405	-0.2722
23.39	2.0611	4.4701	0.0339	0.8714	0.1743	-0.0445	-0.7455	1.8493	-23.7425		23.406	0.6936	-1.8679	-0.1156	-0.0707	-3.0114	-0.03	-0.4283	5.247	-23.3796		23.406	-0.6217	4.3006	-0.7395	-0.057	0.2928	-0.1563	-1.6338	4.9265	-25.6479		23.406	-2.4841	0.9359	-0.9864	-0.2569	0.073	0.0381	0.2062	-0.5227	-9.5881		23.391	-0.4394	-1.3854	-0.915	-0.0525	-0.2602
23.453	2.1392	4.4701	0.0274	0.9276	0.1314	-0.0421	-0.6821	2.2981	-24.1962		23.469	0.6676	-1.8158	-0.1221	-0.0724	-2.8757	-0.0324	-0.6186	5.1829	-23.0166		23.468	-0.6087	4.3267	-0.7785	-0.0349	0.2979	-0.1588	-1.1262	5.6958	-24.7406		23.469	-2.419	0.9359	-0.9734	-0.2313	0.0919	0.0187	-0.0476	0.2466	-11.0398		23.453	-0.4264	-1.3072	-0.9085	-0.0831	-0.2259
23.515	2.2174	4.4701	0.0209	0.9549	0.1623	-0.0324	-0.5552	2.0416	-25.7386		23.531	0.6546	-1.7245	-0.1026	-0.1116	-2.8087	-0.03	-1.1262	5.0547	-23.0166		23.531	-0.6217	4.3136	-0.811	-0.057	0.3031	-0.1782	-1.1897	5.1188	-25.6479		23.531	-2.3408	0.9099	-0.9604	-0.2756	0.0644	0.0114	-0.1745	0.1184	-9.1344		23.516	-0.4394	-1.2028	-0.902	-0.061	-0.1074
23.578	2.3085	4.4571	0.0209	0.9907	0.1228	-0.0421	-0.6186	2.6186	-24.8313		23.594	0.6155	-1.6593	-0.1026	-0.1252	-2.6336	-0.0324	-1.2531	5.3111	-22.3815		23.593	-0.6217	4.3006	-0.85	-0.0332	0.2996	-0.1831	-1.7607	4.9265	-25.6479		23.594	-2.2757	0.9359	-0.9474	-0.2143	0.1159	-0.0057	0.2062	-0.138	-11.0398		23.578	-0.4394	-1.1507	-0.902	-0.0542	-0.0627
23.64	2.3867	4.4571	0.0209	1.0605	0.1107	-0.0543	-0.5552	2.4263	-25.8294		23.656	0.5894	-1.568	-0.0831	-0.1048	-2.5236	-0.0421	-0.4283	5.1188	-22.563		23.656	-0.6217	4.3006	-0.8955	-0.04	0.31	-0.1709	-1.1897	4.8624	-25.5572		23.656	-2.1846	0.9359	-0.9474	-0.1564	0.0712	0.0187	0.3331	-0.9073	-9.951		23.641	-0.4394	-1.0463	-0.902	-0.0473	-0.0318
23.703	2.4648	4.4701	0.0144	1.1099	0.0953	-0.0202	0.1427	2.6186	-25.9201		23.719	0.5634	-1.5028	-0.0831	-0.0707	-2.4	-0.0275	-0.9993	5.0547	-22.2908		23.718	-0.6217	4.3136	-0.9215	-0.0485	0.2636	-0.1904	-1.9511	5.247	-25.0128		23.719	-2.1064	0.9359	-0.9539	-0.1223	0.085	0.0284	0.2062	-0.138	-10.2232		23.703	-0.4394	-0.9811	-0.8825	-0.0865	-0.0335
23.765	2.543	4.4571	0.0079	1.1423	0.097	-0.0324	0.5869	2.6827	-26.1016		23.781	0.5764	-1.4115	-0.0701	-0.0332	-2.2729	-0.03	-0.5552	5.5035	-21.6556		23.781	-0.6087	4.3006	-0.9604	-0.057	0.2928	-0.1806	-1.0628	5.1188	-25.3757		23.781	-2.0283	0.9359	-0.9539	-0.1223	0.0987	0.043	0.3965	0.0543	-9.951		23.766	-0.4655	-0.9029	-0.8825	-0.049	-0.0988
23.828	2.6211	4.4832	0.0014	1.2087	0.0815	-0.0445	-0.0476	2.4263	-27.0089		23.844	0.5504	-1.3332	-0.0571	-0.0349	-2.1682	-0.0421	-0.9359	5.7599	-22.4722		23.843	-0.5957	4.3136	-0.9994	-0.0434	0.2722	-0.2098	-1.3166	5.1829	-25.1035		23.844	-1.9632	0.9359	-0.9474	-0.153	0.0884	0.0114	-0.3648	-0.0739	-9.4973		23.828	-0.4394	-0.7985	-0.863	-0.0422	-0.0679
23.89	2.6992	4.4571	-0.0051	1.2752	0.0489	-0.0445	-0.3014	2.4263	-27.0996		23.906	0.5374	-1.2419	-0.0441	-0.0213	-2.0651	-0.0324	-0.9359	6.0163	-21.9278		23.906	-0.5957	4.3267	-1.0449	-0.0536	0.2962	-0.2049	-1.0628	5.247	-24.7406		23.906	-1.885	0.9359	-0.9345	-0.1325	0.109	0.0162	0.3331	-0.0098	-10.2232		23.891	-0.4394	-0.7333	-0.8695	-0.0422	0.0146
23.953	2.7774	4.4701	-0.0116	1.2905	0.0369	-0.03	0.2062	2.2981	-27.644		23.969	0.5113	-1.1767	-0.0506	-0.0366	-1.9741	-0.03	-1.0628	5.8881	-21.4742		23.968	-0.5827	4.3006	-1.0839	-0.0315	0.2876	-0.2098	-1.6338	4.9265	-24.7406		23.969	-1.7678	0.9229	-0.915	-0.1496	0.0815	0.0138	-0.1745	0.3748	-10.0417		23.953	-0.4264	-0.6551	-0.8695	-0.0593	0.0695
24.015	2.8555	4.444	-0.0116	1.328	0.0712	-0.0129	0.1427	2.1057	-27.5533		24.031	0.4983	-1.0985	-0.0311	-0.0332	-1.8264	-0.03	-0.1111	5.9522	-21.9278		24.031	-0.5696	4.3006	-1.1164	-0.0536	0.2962	-0.2074	-0.9359	5.3753	-23.4703		24.031	-1.6897	0.9359	-0.9085	-0.1087	0.0815	0.0308	-0.1745	-0.0098	-9.5881		24.016	-0.4264	-0.5768	-0.8695	-0.0473	0.0712
24.078	2.9337	4.4571	-0.0181	1.4063	-0.0043	-0.0397	0.3331	2.6827	-28.007		24.094	0.4462	-1.0072	-0.0116	-0.0451	-1.7629	-0.0324	-1.0628	5.247	-22.0186		24.093	-0.5696	4.3136	-1.1554	-0.0536	0.2928	-0.2122	-1.2531	5.1829	-23.924		24.094	-1.6115	0.9229	-0.9085	-0.0388	0.097	0.0332	-0.4283	0.1184	-10.6769		24.078	-0.4264	-0.4856	-0.8565	-0.0422	0.1107
24.14	2.9988	4.4571	-0.0311	1.4864	-0.0198	-0.0348	-0.1111	2.1057	-27.7348		24.156	0.4332	-0.929	-0.0051	-0.0809	-1.6959	-0.03	-0.809	5.247	-21.8371		24.156	-0.5827	4.3006	-1.1944	-0.0349	0.3014	-0.2511	-1.4435	4.7342	-24.6498		24.156	-1.5464	0.9229	-0.902	-0.061	0.0747	0.0016	-0.0476	0.2466	-10.3139		24.141	-0.4394	-0.3943	-0.85	-0.0354	0.1829
24.203	3.09	4.4571	-0.0441	1.5477	-0.0129	-0.0518	-0.4917	2.234	-27.9162		24.219	0.3941	-0.8768	0.0079	-0.0758	-1.5808	-0.0275	0.1427	5.824	-21.202		24.218	-0.5696	4.3267	-1.2269	-0.0366	0.2893	-0.2584	-1.6338	4.9265	-24.1962		24.219	-1.4422	0.9099	-0.902	-0.0337	0.1056	-0.0032	0.0793	-0.3945	-10.4047		24.203	-0.4264	-0.316	-0.8565	-0.0576	0.1331
24.265	3.1681	4.4701	-0.0571	1.6448	-0.0627	-0.0275	-0.238	2.1057	-27.8255		24.281	0.3811	-0.7855	0.0144	-0.0451	-1.4434	-0.0348	0.0793	5.7599	-21.7464		24.281	-0.5696	4.3006	-1.2659	-0.0792	0.2945	-0.2463	-1.4435	5.1188	-23.2888		24.281	-1.3641	0.9359	-0.8825	-0.0303	0.0953	0.0259	0.1427	0.1825	-9.8603		24.266	-0.4394	-0.2378	-0.8435	-0.0525	0.0833
24.328	3.2723	4.444	-0.0766	1.6704	-0.0335	-0.047	0.46	1.657	-29.2773		24.344	0.3811	-0.7073	0.0209	-0.0298	-1.3833	-0.0445	-0.6821	6.2728	-21.4742		24.343	-0.5566	4.3267	-1.3114	-0.0707	0.2928	-0.2827	-1.5069	5.1829	-23.924		24.344	-1.2729	0.9229	-0.876	-0.0388	0.097	0.0308	0.3965	0.5672	-10.2232		24.328	-0.4394	-0.1726	-0.8305	-0.0439	0.1193
24.39	3.3374	4.4701	-0.0831	1.7522	-0.0953	-0.0494	0.5234	2.7468	-29.368		24.406	0.3811	-0.616	0.0274	0.006	-1.2923	-0.0445	-0.8724	6.0804	-21.5649		24.406	-0.5696	4.3136	-1.3439	-0.069	0.2945	-0.2827	-1.1897	4.8624	-24.1054		24.406	-1.1948	0.9359	-0.863	-0.0388	0.1142	0.0041	-0.1111	-0.0739	-9.6788		24.391	-0.4394	-0.0682	-0.8305	-0.0695	0.1382
24.453	3.4155	4.4571	-0.0896	1.8135	-0.1125	-0.047	0.2062	2.4263	-29.4587		24.469	0.368	-0.5247	0.0209	-0.0093	-1.2803	-0.047	-1.1897	6.5292	-21.9278		24.468	-0.5696	4.3006	-1.3894	-0.0792	0.2945	-0.29	-1.5069	5.3111	-23.2888		24.469	-1.1297	0.9359	-0.8305	-0.049	0.1004	0.0162	-0.0476	0.2466	-10.0417		24.453	-0.4394	0.0231	-0.824	-0.0542	0.2155
24.515	3.4937	4.4571	-0.0961	1.8748	-0.0541	-0.03	0.7772	1.7211	-29.368		24.531	0.368	-0.4595	0.0469	0.0145	-1.1395	-0.03	-0.3648	6.4651	-21.6556		24.531	-0.5696	4.3136	-1.4219	-0.0502	0.2859	-0.3046	-1.1897	4.9906	-24.0147		24.531	-1.0385	0.9359	-0.8175	-0.0439	0.1056	0.0162	0.6503	0.6954	-9.6788		24.516	-0.4264	0.0883	-0.8175	-0.0542	0.2258
24.578	3.5588	4.4571	-0.1091	2.0026	-0.0868	-0.0324	0.3965	1.9775	-29.5495		24.594	0.342	-0.3682	0.0469	-0.0076	-1.0107	-0.03	0.5234	6.5933	-22.2908		24.593	-0.5436	4.3136	-1.4544	-0.0451	0.2705	-0.3265	-1.5704	5.247	-23.924		24.594	-0.9603	0.9359	-0.811	-0.0184	0.0901	0.0016	-0.238	0.0543	-10.0417		24.578	-0.4394	0.1665	-0.8175	-0.0354	0.2687
24.64	3.65	4.4701	-0.1286	2.0809	-0.0627	-0.0445	0.46	1.5288	-30.2753		24.656	0.342	-0.303	0.0794	-0.0042	-0.9592	-0.0227	-0.238	6.3369	-20.9298		24.656	-0.5436	4.3136	-1.4869	-0.0656	0.2876	-0.3289	-1.1897	4.9906	-23.7425		24.656	-0.8822	0.9359	-0.798	0.0395	0.097	0.0114	-0.1111	0.3107	-10.4954		24.641	-0.4264	0.2578	-0.8045	-0.0439	0.2361
24.703	3.7281	4.4701	-0.1351	2.1866	-0.0524	-0.0227	1.9193	1.8493	-30.3661		24.719	0.316	-0.2117	0.0924	-0.0076	-0.9489	-0.0445	-0.6821	6.401	-21.8371		24.718	-0.5176	4.3136	-1.5259	-0.04	0.2825	-0.3435	-1.6973	4.8624	-24.1054		24.719	-0.791	0.9359	-0.785	0.0378	0.0919	0.0284	0.5869	-0.3945	-10.8583		24.703	-0.4264	0.336	-0.811	-0.0473	0.2979
24.765	3.8062	4.4962	-0.1546	2.2888	-0.128	-0.0445	0.5234	1.4647	-30.2753		24.781	0.2899	-0.1465	0.1184	-0.0315	-0.8733	-0.0324	0.0793	6.2728	-22.0186		24.781	-0.5436	4.3006	-1.5648	-0.0502	0.2687	-0.3799	-1.6973	4.8624	-23.1074		24.781	-0.7259	0.9229	-0.7785	0.0838	0.1004	0.0162	0.7138	-0.3945	-11.2213		24.766	-0.4524	0.4143	-0.8045	-0.0422	0.3237
24.828	3.8453	4.5353	-0.1741	2.3552	-0.0953	-0.0324	0.9041	1.2082	-30.4568		24.844	0.2769	-0.0552	0.1314	-0.0264	-0.8235	-0.0275	-0.3648	6.0804	-21.5649		24.843	-0.5306	4.3006	-1.6103	-0.0622	0.2602	-0.3824	-1.7607	5.0547	-23.6518		24.844	-0.6478	0.9229	-0.7785	0.106	0.1365	0.0235	1.0945	-0.3945	-9.7695		24.828	-0.4394	0.4925	-0.8045	-0.0456	0.3615
24.89	3.9235	4.5614	-0.1871	2.4864	-0.0971	-0.0397	1.031	1.4647	-30.3661		24.906	0.2639	0.0361	0.1379	-0.0281	-0.7496	-0.047	-0.1745	5.7599	-21.9278		24.906	-0.5045	4.3006	-1.6363	-0.0622	0.2773	-0.414	-1.9511	4.606	-23.561		24.906	-0.5696	0.9229	-0.772	0.0532	0.0867	0.0065	0.8407	-0.5227	-10.2232		24.891	-0.4264	0.5969	-0.7915	-0.0422	0.3649
24.953	4.0146	4.5875	-0.2131	2.6414	-0.1297	-0.0275	0.9041	0.6954	-29.8217		24.969	0.2378	0.1143	0.1444	-0.0366	-0.6518	-0.0567	0.5234	6.0804	-20.839		24.968	-0.5045	4.3136	-1.6753	-0.0792	0.2842	-0.4164	-1.38	4.7983	-22.9259		24.969	-0.4785	0.9359	-0.746	0.0208	0.0919	0.0259	-0.1111	0.1825	-10.4954		24.953	-0.4264	0.6621	-0.798	-0.0371	0.3701
25.015	4.0797	4.6005	-0.2391	2.7181	-0.1074	-0.0445	1.3483	1.1441	-30.6383		25.031	0.2118	0.1795	0.1704	-0.0468	-0.6037	-0.064	0.5234	6.0163	-20.839		25.031	-0.5045	4.3136	-1.7143	-0.0656	0.2911	-0.4358	-2.0145	4.5419	-22.9259		25.031	-0.3873	0.9359	-0.707	0.0378	0.0919	0.0284	0.3965	0.4389	-10.1325		25.016	-0.4394	0.7534	-0.785	-0.0542	0.3872
25.078	4.1839	4.6527	-0.2521	2.8203	-0.1005	-0.03	1.1579	1.3365	-31.3641		25.094	0.1857	0.2578	0.1834	-0.0162	-0.5487	-0.0445	0.1427	5.6958	-20.9298		25.093	-0.5045	4.3136	-1.7403	-0.0894	0.2602	-0.465	-1.2531	4.2854	-23.1074		25.094	-0.2962	0.9229	-0.6875	0.0412	0.0919	0.0138	-0.3648	0.1825	-9.7695		25.078	-0.4264	0.8316	-0.7915	-0.0542	0.3701
25.14	4.2621	4.6918	-0.2716	2.8901	-0.1434	-0.0445	0.9041	1.5929	-31.1827		25.156	0.1727	0.336	0.1834	-0.0315	-0.5607	-0.047	-0.4283	6.5292	-20.7483		25.156	-0.4915	4.3136	-1.7858	-0.0758	0.2773	-0.516	-1.9511	3.9649	-22.6537		25.156	-0.231	0.9229	-0.681	0.0549	0.1159	0.0114	0.0158	0.4389	-10.7676		25.141	-0.4264	0.9229	-0.785	-0.0473	0.401
25.203	4.3402	4.744	-0.2976	3.0367	-0.0438	-0.0324	1.6655	1.5929	-30.9105		25.219	0.1727	0.4143	0.1834	-0.0298	-0.4628	-0.0543	-0.9993	6.0804	-21.202		25.218	-0.4785	4.3006	-1.8118	-0.0911	0.2756	-0.516	-1.6338	4.2854	-23.0166		25.219	-0.1399	0.9229	-0.681	0.0975	0.1107	0.0162	0.6503	-0.0739	-9.6788		25.203	-0.4394	1.0011	-0.785	-0.0337	0.3872
25.265	4.4053	4.7701	-0.3236	3.1917	-0.1005	-0.0421	0.7772	1.3365	-31.6363		25.281	0.1727	0.5056	0.1899	-0.0315	-0.3959	-0.047	0.1427	6.2087	-21.5649		25.281	-0.4915	4.3267	-1.8508	-0.0588	0.2567	-0.5549	-1.8876	3.9008	-22.2908		25.281	-0.0748	0.9359	-0.681	0.1384	0.1073	0.0162	-0.0476	0.1184	-10.1325		25.266	-0.4394	1.0924	-0.7785	-0.0644	0.4422
25.328	4.4965	4.8092	-0.3431	3.316	-0.0576	-0.0251	1.0945	0.8877	-31.3641		25.344	0.1597	0.5708	0.1899	-0.0179	-0.3237	-0.0421	0.2696	5.824	-21.202		25.343	-0.4655	4.3267	-1.8833	-0.0775	0.279	-0.5646	-1.2531	3.9008	-23.561		25.344	0.0034	0.9229	-0.6745	0.1452	0.0867	0.0187	0.9676	-0.0098	-11.8564		25.328	-0.4264	1.1446	-0.7785	-0.0371	0.4903
25.39	4.5877	4.8353	-0.356	3.4523	-0.0576	-0.0275	0.5869	0.503	-31.6363		25.406	0.1727	0.6751	0.1899	-0.0162	-0.2911	-0.0275	0.5234	5.6958	-21.2927		25.406	-0.4655	4.3136	-1.9158	-0.069	0.2911	-0.5841	-1.6973	4.7342	-22.2908		25.406	0.0946	0.9229	-0.668	0.1332	0.1022	0.0332	0.7138	-0.5227	-10.4047		25.391	-0.4394	1.2359	-0.772	-0.0525	0.5298
25.453	4.6528	4.8353	-0.3885	3.5597	-0.1108	-0.0445	0.2062	0.8877	-31.1827		25.469	0.1597	0.7403	0.1964	-0.0349	-0.2894	-0.047	-0.4283	5.5035	-21.1112		25.468	-0.4524	4.3136	-1.9353	-0.0758	0.2979	-0.606	-0.9359	3.9649	-22.4722		25.469	0.1597	0.9359	-0.6355	0.1435	0.1365	0.0162	0.3331	-0.0098	-10.7676		25.453	-0.4394	1.3272	-0.772	-0.0865	0.4714
25.515	4.7309	4.8483	-0.4145	3.7266	-0.0421	-0.0372	1.0945	0.503	-31.7271		25.531	0.1597	0.8186	0.1899	-0.023	-0.2362	-0.0372	0.2062	5.8881	-21.2927		25.531	-0.4394	4.3136	-1.9678	-0.0826	0.3048	-0.6497	-1.1262	4.1572	-22.2		25.531	0.2508	0.9359	-0.6095	0.1366	0.0987	0.0308	0.5234	0.5672	-10.4954		25.516	-0.4394	1.4185	-0.759	-0.0712	0.4697
25.578	4.783	4.8353	-0.434	3.9089	-0.085	-0.0445	0.2062	1.1441	-31.3641		25.594	0.1597	0.8968	0.1964	-0.0332	-0.2362	-0.0445	-0.1745	6.0163	-20.1132		25.593	-0.4264	4.3136	-2.0263	-0.0826	0.2739	-0.6789	-1.5069	3.5161	-21.7464		25.594	0.329	0.9359	-0.603	0.1792	0.1073	0.0138	0.5234	0.0543	-9.5881		25.578	-0.4134	1.4837	-0.7525	-0.0422	0.4645
25.64	4.8872	4.8353	-0.4665	4.0179	-0.1194	-0.0275	1.0945	0.8877	-30.3661		25.656	0.1727	0.9751	0.1834	-0.0213	-0.1898	-0.047	-0.809	5.7599	-20.839		25.656	-0.4394	4.3136	-2.0588	-0.0809	0.2722	-0.7153	-1.8242	3.8367	-21.6556		25.656	0.4201	0.9229	-0.5965	0.198	0.0815	0.0235	0.3965	-0.0739	-10.7676		25.641	-0.4264	1.5489	-0.7525	-0.0542	0.5074
25.703	4.9393	4.8614	-0.486	4.2377	-0.1074	-0.0348	0.9041	0.0543	-30.5475		25.719	0.1466	1.0664	0.1834	-0.0247	-0.1314	-0.0372	-0.4917	5.5676	-21.0205		25.718	-0.4003	4.3006	-2.0978	-0.0945	0.2859	-0.7323	-1.4435	3.3238	-21.2927		25.719	0.4853	0.9229	-0.603	0.2286	0.109	0.0187	0.7138	-0.2663	-11.1305		25.703	-0.4264	1.6271	-0.7525	-0.0661	0.571
25.765	5.0174	4.8483	-0.5185	4.4148	-0.073	-0.0348	1.0945	0.2466	-30.8197		25.781	0.1727	1.1446	0.1704	-0.0162	-0.1091	-0.0348	-0.1111	6.0804	-20.7483		25.781	-0.3873	4.3136	-2.1302	-0.0673	0.2859	-0.7664	-1.2531	3.6443	-21.8371		25.781	0.5764	0.9359	-0.5835	0.2491	0.0953	0.0089	0.0158	0.1825	-9.951		25.766	-0.4264	1.7184	-0.7525	-0.0695	0.6088
25.828	5.0825	4.8483	-0.538	4.4915	-0.0885	-0.03	1.4117	0.3107	-31.0919		25.844	0.1597	1.2098	0.1704	-0.0451	-0.0352	-0.0348	0.3331	6.1446	-20.5668		25.843	-0.3352	4.3006	-2.1627	-0.0741	0.2687	-0.7858	-2.0145	3.7726	-21.202		25.844	0.6546	0.9229	-0.577	0.261	0.0764	0.0187	0.7772	0.8236	-12.1286		25.828	-0.4264	1.8097	-0.7395	-0.0371	0.5658
25.89	5.1607	4.8483	-0.5575	4.6738	-0.0868	-0.0324	1.4752	0.8877	-31.4549		25.906	0.1727	1.3011	0.1639	-0.0059	0.0077	-0.0494	-0.0476	5.8881	-20.7483		25.906	-0.3222	4.3267	-2.2017	-0.0928	0.267	-0.8441	-1.6973	4.4777	-21.4742		25.906	0.7457	0.9359	-0.551	0.261	0.1142	0.0284	0.5234	0.0543	-11.4935		25.891	-0.4264	1.901	-0.746	-0.0559	0.6259
25.953	5.2388	4.8483	-0.5835	4.8799	-0.0541	-0.0372	1.4752	0.2466	-31.9993		25.969	0.1597	1.3663	0.1639	-0.0281	0.0575	-0.0275	0.9676	5.8881	-20.9298		25.968	-0.2962	4.3136	-2.2407	-0.0758	0.2842	-0.832	-1.2531	3.9008	-21.7464		25.969	0.8239	0.9359	-0.538	0.2576	0.0901	0.0065	-0.1111	0.5672	-11.9471		25.953	-0.4264	1.9662	-0.7395	-0.0337	0.6517
26.015	5.317	4.8614	-0.6095	4.9992	-0.1056	-0.0324	1.0945	0.503	-31.9993		26.031	0.1466	1.4576	0.1574	-0.0639	0.0317	-0.0275	0.5869	6.1446	-20.3854		26.031	-0.2701	4.3136	-2.2732	-0.0843	0.2756	-0.8539	-1.8242	4.0931	-21.0205		26.031	0.915	0.9359	-0.5185	0.2661	0.0506	0.0211	0.6503	0.4389	-11.4027		26.016	-0.4264	2.0575	-0.7265	-0.0678	0.686
26.078	5.3821	4.8744	-0.6355	5.2087	-0.0868	-0.0494	0.8407	0.7595	-31.2734		26.094	0.1727	1.5228	0.1574	-0.0298	0.0455	-0.047	0.0793	5.247	-20.5668		26.093	-0.231	4.3006	-2.3187	-0.0758	0.2773	-0.9025	-1.6973	3.7084	-20.9298		26.094	0.9801	0.9359	-0.499	0.2883	0.1004	0.0114	0.0158	0.4389	-10.4954		26.078	-0.4264	2.1097	-0.733	-0.0354	0.7049
26.14	5.4732	4.8614	-0.655	5.3654	-0.128	-0.0421	0.7138	0.503	-31.0012		26.156	0.1597	1.6141	0.1509	-0.0042	0.1056	-0.047	-0.3648	5.5676	-20.2946		26.156	-0.205	4.3006	-2.3642	-0.086	0.2979	-0.917	-1.7607	3.3879	-21.4742		26.156	1.0453	0.949	-0.499	0.3581	0.0747	0.0089	0.5234	-0.5868	-11.1305		26.141	-0.4134	2.2009	-0.72	-0.0661	0.7771
26.203	5.5384	4.8744	-0.6745	5.5443	-0.1091	-0.0324	0.9041	-0.0739	-31.9993		26.219	0.1597	1.6923	0.1444	-0.0162	0.121	-0.047	0.0158	5.5676	-20.9298		26.218	-0.1659	4.3136	-2.4032	-0.0707	0.2825	-0.9413	-0.9993	4.029	-20.839		26.219	1.1625	0.9359	-0.486	0.3939	0.0695	-0.0057	1.031	-0.0739	-11.1305		26.203	-0.4264	2.2922	-0.7265	-0.0593	0.7599
26.265	5.5774	4.9005	-0.707	5.7488	-0.0713	-0.0348	1.2214	0.3748	-32.4529		26.281	0.1727	1.7706	0.1379	-0.0332	0.1691	-0.0372	0.1427	5.4394	-21.202		26.281	-0.1268	4.3267	-2.4422	-0.0928	0.2773	-0.9632	-2.0145	3.7726	-20.3854		26.281	1.2406	0.9229	-0.4795	0.4228	0.109	0.0284	1.0945	-0.3945	-10.9491		26.266	-0.4134	2.3705	-0.707	-0.0644	0.7925
26.328	5.6946	4.8744	-0.746	5.8765	-0.0902	-0.047	0.6503	0.0543	-31.7271		26.344	0.1727	1.8619	0.1379	-0.0434	0.2	-0.03	0.5234	5.824	-21.2927		26.343	-0.1268	4.3006	-2.4747	-0.0639	0.2687	-1.0264	-2.078	3.9649	-19.841		26.344	1.3057	0.949	-0.473	0.4774	0.0541	0.043	1.3483	-0.6509	-12.0379		26.328	-0.4134	2.4618	-0.7135	-0.0439	0.8372
26.39	5.7598	4.9266	-0.7525	6.0435	-0.0318	-0.0397	1.0945	-0.3945	-31.2734		26.406	0.1597	1.9271	0.1314	-0.0264	0.2344	-0.0567	0.2696	6.0804	-20.7483		26.406	-0.1008	4.3136	-2.5137	-0.0758	0.2842	-1.024	-1.1897	3.9649	-20.2039		26.406	1.3839	0.9229	-0.4535	0.4603	0.0781	0.0235	1.4117	-0.9714	-11.4027		26.391	-0.4134	2.527	-0.7005	-0.0797	0.8526
26.453	5.8249	4.9135	-0.772	6.282	-0.0936	-0.0494	0.1427	0.1825	-32.2715		26.469	0.1597	2.0053	0.1314	-0.0179	0.2533	-0.03	0.5869	6.1446	-20.4761		26.468	-0.0617	4.3136	-2.5527	-0.0962	0.2808	-1.0799	-1.3166	4.4777	-19.6595		26.469	1.462	0.9359	-0.4405	0.4825	0.121	0.0138	0.5869	0.1184	-11.9471		26.453	-0.4264	2.6183	-0.7005	-0.0593	0.9213
26.515	5.89	4.9135	-0.798	6.391	-0.1177	-0.0494	0.3331	-0.5227	-31.4549		26.531	0.1727	2.0705	0.1184	-0.0213	0.2979	-0.0251	0.6503	6.0804	-21.0205		26.531	-0.0227	4.3136	-2.5917	-0.0605	0.2722	-1.1017	-2.0145	4.029	-19.5688		26.531	1.5271	0.9359	-0.434	0.5608	0.0936	0.0357	1.0945	-0.0098	-11.4027		26.516	-0.4134	2.7096	-0.6875	-0.0712	0.978
26.578	5.9681	4.9266	-0.8175	6.5886	-0.0215	-0.0543	1.1579	0.0543	-32.2715		26.594	0.1727	2.1749	0.1119	-0.057	0.31	-0.03	0.5234	5.9522	-20.7483		26.593	0.0164	4.3006	-2.6242	-0.0826	0.2808	-1.1261	-1.2531	4.2854	-19.6595		26.594	1.6183	0.9751	-0.421	0.5677	0.0936	0.0187	1.2214	-0.3945	-11.0398		26.578	-0.4134	2.7617	-0.694	-0.0542	1.0226
26.64	6.0463	4.9135	-0.8435	6.7982	-0.1537	-0.0445	0.3965	-0.5868	-32.09		26.656	0.1727	2.2531	0.1184	-0.0502	0.3203	-0.0324	0.3965	5.9522	-20.5668		26.656	0.0425	4.3006	-2.6632	-0.0502	0.2825	-1.1795	-1.9511	3.9649	-20.3854		26.656	1.6964	0.949	-0.4145	0.6256	0.0901	0.0308	1.2848	-0.715	-12.7637		26.641	-0.4003	2.853	-0.6875	-0.0576	1.0192
26.703	6.0984	4.9135	-0.8695	7.0179	-0.1074	-0.0372	1.2214	-0.3945	-31.9993		26.719	0.1727	2.3444	0.1054	-0.0213	0.3288	-0.0494	-0.1111	5.4394	-20.9298		26.718	0.0555	4.3136	-2.7087	-0.0502	0.279	-1.1965	-2.3952	3.3879	-19.7502		26.719	1.7616	0.9881	-0.3885	0.6239	0.0438	0.0162	0.6503	-1.2279	-12.673		26.703	-0.4003	2.9182	-0.681	-0.0882	1.0707
26.765	6.1895	4.9266	-0.8825	7.1525	-0.0507	-0.0324	1.4752	-0.2663	-31.9993		26.781	0.1727	2.4226	0.0924	-0.0451	0.3495	-0.03	0.0158	5.6958	-21.0205		26.781	0.0815	4.3136	-2.7541	-0.0502	0.2722	-1.2597	-1.5704	3.3238	-20.2946		26.781	1.8397	0.9881	-0.382	0.6699	0.1073	0.0089	0.5869	-0.2663	-11.8564		26.766	-0.3873	3.0225	-0.6745	-0.0882	1.136
26.828	6.2677	4.9527	-0.8955	7.3689	-0.0868	-0.0348	0.9676	-0.6509	-31.9993		26.844	0.1727	2.5139	0.0924	-0.0383	0.3495	-0.0445	-0.4283	5.3753	-20.9298		26.843	0.0946	4.3136	-2.7996	-0.0673	0.2619	-1.3083	-2.2683	3.5161	-19.6595		26.844	1.9309	1.0011	-0.369	0.6682	0.0609	0.0259	0.8407	0.1184	-12.7637		26.828	-0.3743	3.1008	-0.6745	-0.0967	1.1755
26.89	6.3458	4.9266	-0.928	7.6227	-0.0782	-0.0348	0.6503	-0.4586	-32.09		26.906	0.1597	2.5791	0.0794	-0.0639	0.3821	-0.0275	0.46	5.6317	-20.4761		26.906	0.1336	4.3136	-2.8321	-0.0434	0.2378	-1.3618	-2.1414	3.6443	-20.2946		26.906	2.009	1.0142	-0.356	0.7125	0.085	0.0065	0.9676	-0.3945	-12.8545		26.891	-0.3613	3.179	-0.655	-0.0899	1.1583
26.953	6.424	4.9396	-0.9474	7.7164	0.006	-0.0348	1.0945	0.3748	-32.09		26.969	0.1857	2.6704	0.0794	-0.04	0.4267	-0.0421	0.3331	5.3753	-20.2039		26.968	0.1206	4.3136	-2.8841	-0.0536	0.2481	-1.4055	-2.2683	3.2597	-19.7502		26.969	2.0741	1.0272	-0.3366	0.767	0.0781	0.0235	0.6503	0.1825	-12.8545		26.953	-0.3482	3.2442	-0.655	-0.1002	1.2476
27.015	6.463	4.9396	-0.9539	7.5409	-0.0507	-0.0397	1.6021	1.5288	-31.9085		27.031	0.1597	2.7617	0.0599	-0.04	0.4542	-0.0348	0.46	5.5035	-20.839		27.031	0.1206	4.3006	-2.9166	-0.069	0.2189	-1.4566	-1.6973	3.5802	-20.839		27.031	2.1783	1.0533	-0.3366	0.8351	0.0575	0.0187	1.4117	-0.715	-13.9433		27.016	-0.3222	3.3355	-0.642	-0.0933	1.2923
27.078	6.463	4.9396	-0.9539	7.2002	-0.0507	-0.0348	0.2062	2.6827	-30.8197		27.094	0.1727	2.8269	0.0534	-0.0417	0.4422	-0.0421	1.031	5.4394	-20.2946		27.093	0.1466	4.3136	-2.9621	-0.0622	0.2292	-1.5052	-2.1414	3.6443	-19.6595		27.094	2.2434	1.0533	-0.3301	0.8692	0.0953	0.0187	1.2848	-0.4586	-14.034		27.078	-0.2701	3.4268	-0.629	-0.1138	1.3713
27.14	6.437	4.9396	-0.928	6.8339	-0.0661	-0.0494	-0.1745	1.7852	-30.0031		27.156	0.1597	2.9052	0.0404	-0.0553	0.4456	-0.0397	-0.5552	5.5035	-21.1112		27.156	0.1466	4.3136	-3.0011	-0.0843	0.2241	-1.5392	-1.7607	3.7726	-20.1132		27.156	2.3085	1.0533	-0.3236	0.9493	0.073	0.0065	0.6503	-0.5868	-13.6711		27.141	-0.218	3.5051	-0.6225	-0.0746	1.4245
27.203	6.3328	4.9266	-0.9085	6.4506	0.1142	-0.0421	1.8559	1.9134	-28.9143		27.219	0.1727	2.9965	0.0469	-0.0485	0.4353	-0.047	-0.1111	5.4394	-20.2946		27.218	0.1857	4.3136	-3.0531	-0.0877	0.2172	-1.5854	-1.8876	3.5161	-19.9317		27.219	2.3867	1.0403	-0.3171	0.9595	0.0627	-0.0008	1.2848	-0.715	-14.2155		27.203	-0.1789	3.5572	-0.6095	-0.0746	1.4726
27.265	6.2807	4.9527	-0.889	6.1218	-0.0387	-0.0494	-0.0476	2.1699	-28.7328		27.281	0.1597	3.0747	0.0339	-0.0196	0.492	-0.0518	-0.0476	5.3753	-20.9298		27.281	0.2118	4.3267	-3.0986	-0.0656	0.2155	-1.6486	-2.0145	3.1315	-20.1132		27.281	2.4518	1.0533	-0.3106	1.0583	0.1039	-0.0032	1.4117	-0.9714	-15.4857		27.266	-0.1268	3.6355	-0.603	-0.0797	1.488
27.328	6.2156	4.9396	-0.8695	5.9856	-0.0043	-0.0397	0.1427	1.3365	-28.0977		27.344	0.1597	3.166	0.0209	-0.0417	0.5143	-0.0348	0.3965	5.6958	-20.6576		27.343	0.2508	4.2875	-3.2026	-0.0434	0.231	-1.6705	-2.1414	3.2597	-20.2946		27.344	2.5299	1.0533	-0.2911	1.0566	0.0575	0.0284	1.4117	-0.8432	-15.2135		27.328	-0.1008	3.7137	-0.5965	-0.0559	1.5087
27.39	6.1505	4.9657	-0.85	5.592	0.0901	-0.047	1.4117	3.6443	-27.9162		27.406	0.1597	3.2442	0.0079	-0.0605	0.492	-0.03	1.6021	5.247	-21.7464		27.406	0.2639	4.3006	-3.2546	-0.0383	0.1983	-1.7336	-2.1414	3.1315	-19.7502		27.406	2.6211	1.0664	-0.2846	1.1196	0.0592	0.0235	1.9828	-1.1638	-15.5765		27.391	-0.0617	3.792	-0.577	-0.0729	1.6014
27.453	6.0723	4.9657	-0.824	5.2428	-0.0284	-0.0494	-0.3014	4.606	-27.644		27.469	0.1597	3.3095	-0.0051	-0.0485	0.4834	-0.0275	-0.1111	5.1829	-21.1112		27.468	0.2899	4.3006	-3.3001	-0.0315	0.2086	-1.7604	-2.4587	3.3238	-19.2058		27.469	2.6862	1.0664	-0.2846	1.2065	0.109	0.0332	1.4752	-0.6509	-15.0321		27.453	-0.0096	3.9094	-0.577	-0.0661	1.7147
27.515	6.0072	4.9657	-0.798	5.1627	0.042	-0.0494	0.7772	2.7468	-26.5552		27.531	0.1597	3.4007	0.0014	-0.023	0.5195	-0.0348	1.4117	5.3111	-21.2927		27.531	0.316	4.3267	-3.3455	-0.0519	0.2121	-1.775	-1.7607	3.7726	-19.2966		27.531	2.7644	1.0664	-0.2651	1.232	0.0352	-0.0057	1.031	0.1825	-16.756		27.516	0.0555	3.9615	-0.564	-0.0593	1.8006
27.578	5.9291	4.9657	-0.7785	4.96	0.0163	-0.0397	0.2062	2.5545	-25.8294		27.594	0.1857	3.492	-0.0116	-0.0417	0.5521	-0.0275	1.729	5.3753	-20.9298		27.593	0.342	4.3267	-3.3975	-0.0145	0.2327	-1.8309	-2.0145	3.0674	-19.9317		27.594	2.8555	1.0664	-0.2716	1.3121	0.1022	0.0259	1.4117	-0.8432	-15.7579		27.578	0.0555	4.0528	-0.5575	-0.0576	1.8744
27.64	5.8379	4.9657	-0.7525	4.6976	0.0163	-0.047	0.2062	3.5802	-26.646		27.656	0.1727	3.5442	-0.0246	-0.0536	0.5538	-0.0251	0.8407	5.5035	-22.2		27.656	0.342	4.3136	-3.4365	-0.0332	0.2138	-1.8916	-1.8876	3.9008	-19.9317		27.656	2.9206	1.0664	-0.2521	1.4058	0.0936	0.0211	0.6503	-0.8432	-16.0301		27.641	0.0815	4.0919	-0.551	-0.0678	1.9466
27.703	5.8119	4.9787	-0.733	4.4404	0.0386	-0.0275	0.2062	4.7342	-25.8294		27.719	0.1727	3.6355	-0.0246	-0.0605	0.5504	-0.0348	0.0158	5.6958	-21.7464		27.718	0.355	4.3006	-3.4755	-0.069	0.2498	-1.9548	-1.8242	3.7084	-20.0224		27.719	2.9988	1.0664	-0.2586	1.4518	0.0472	0.0065	0.9676	-0.7791	-17.4819		27.703	0.1076	4.1963	-0.5445	-0.0439	1.9809
27.765	5.7207	4.9657	-0.694	4.2564	0.0146	-0.0251	0.3331	3.7084	-26.283		27.781	0.1727	3.7268	-0.0311	-0.0519	0.5521	-0.0275	1.2848	5.3111	-21.9278		27.781	0.355	4.3136	-3.521	-0.0468	0.2344	-2.0156	-1.6973	2.8109	-19.9317		27.781	3.0639	1.0794	-0.2521	1.5455	0.1107	0.0065	0.7138	-1.0355	-17.7541		27.766	0.1206	4.2615	-0.5445	-0.0116	2.017
27.828	5.6556	4.9787	-0.6745	4.0196	0.0609	-0.0445	0.3331	4.9906	-25.8294		27.844	0.1727	3.805	-0.0441	-0.0434	0.5538	-0.0372	0.0158	5.0547	-22.1093		27.843	0.355	4.3136	-3.5535	-0.0622	0.2052	-2.0496	-1.6973	2.6827	-20.2039		27.844	3.1551	1.0664	-0.2521	1.6068	0.073	0.0235	1.2848	-0.5868	-17.2097		27.828	0.1206	4.3528	-0.538	-0.032	2.1612
27.89	5.5644	4.9657	-0.655	3.8544	0.0111	-0.0494	-0.3014	4.3495	-25.4664		27.906	0.1857	3.8963	-0.0506	-0.0536	0.5607	-0.0372	0.3965	5.1829	-23.4703		27.906	0.368	4.3006	-3.599	-0.0758	0.2086	-2.1298	-1.2531	3.3879	-20.2946		27.906	3.2462	1.0794	-0.2456	1.6767	0.0403	0.0138	1.3483	-1.1638	-18.48		27.891	0.1206	4.4049	-0.538	-0.0439	2.3072
27.953	5.4993	4.9787	-0.616	3.7198	0.0403	-0.0324	0.1427	3.1315	-25.1035		27.969	0.1727	3.9485	-0.0506	-0.0605	0.5607	-0.0348	0.9676	5.5035	-23.2888		27.968	0.3941	4.3006	-3.6315	-0.0758	0.2018	-2.1808	-1.4435	3.3238	-19.9317		27.969	3.3244	1.0794	-0.2391	1.7039	0.1262	0.0114	0.5869	-0.9073	-18.6614		27.953	0.1336	4.4962	-0.538	-0.0712	2.4171
28.015	5.4212	4.9657	-0.59	3.4251	0.0833	-0.0518	0.3331	4.606	-25.1942		28.031	0.1857	4.0528	-0.0636	-0.0451	0.5624	-0.03	0.9676	5.3753	-23.6518		28.031	0.4071	4.3267	-3.677	-0.0707	0.2103	-2.2076	-2.078	3.5802	-19.841		28.031	3.3895	1.0794	-0.2326	1.8079	0.0798	0.0211	1.5386	-0.5868	-19.6595		28.016	0.1206	4.5875	-0.538	-0.0116	2.491
28.078	5.343	4.9657	-0.564	3.3382	0.0472	-0.0348	0.0793	4.606	-25.285		28.094	0.1857	4.1311	-0.0701	-0.0366	0.5469	-0.0227	1.031	5.3111	-24.1962		28.093	0.4201	4.3267	-3.716	-0.057	0.2138	-2.2513	-1.6338	3.3879	-19.478		28.094	3.4676	1.0794	-0.2261	1.8692	0.0592	-0.0227	1.6655	-1.2279	-19.5688		28.078	0.1206	4.6527	-0.5315	-0.0576	2.582
28.14	5.2779	4.9787	-0.538	3.1542	0.0712	-0.0372	0.5234	4.5419	-25.0128		28.156	0.1857	4.2223	-0.0831	-0.0417	0.5967	-0.0324	1.6021	5.7599	-24.0147		28.156	0.4462	4.3006	-3.7615	-0.023	0.2207	-2.2975	-1.6338	3.0033	-20.1132		28.156	3.5328	1.0664	-0.2196	1.9782	0.0901	0.0016	0.5869	-0.7791	-19.2058		28.141	0.1206	4.7309	-0.525	-0.0473	2.6953
28.203	5.1998	4.9787	-0.499	2.9838	0.0369	-0.0397	-0.3014	4.606	-24.1054		28.219	0.1857	4.3006	-0.0896	-0.0298	0.6088	-0.047	0.9676	5.6317	-25.0128		28.218	0.4983	4.3136	-3.794	-0.0042	0.1983	-2.368	-2.3952	3.6443	-19.478		28.219	3.6109	1.0664	-0.2261	2.0975	0.0695	-0.0008	0.8407	-1.5484	-21.4742		28.203	0.1076	4.8092	-0.525	-0.0456	2.7795
28.265	5.1346	4.9787	-0.4795	2.7811	0.042	-0.0445	0.0793	4.4777	-23.8332		28.281	0.1727	4.3788	-0.1026	-0.04	0.6053	-0.0421	1.1579	5.4394	-24.3776		28.281	0.5113	4.3136	-3.833	-0.0093	0.1932	-2.4312	-2.3952	3.6443	-19.3873		28.281	3.689	1.0924	-0.2196	2.1622	0.0936	0.0332	1.8559	-1.4202	-20.6576		28.266	0.1206	4.8874	-0.5185	-0.0507	2.9907
28.328	5.0565	4.9787	-0.447	2.6755	0.1073	-0.0348	0.0158	3.9008	-23.924		28.344	0.1727	4.4701	-0.1026	-0.0366	0.6088	-0.0421	0.7772	5.5676	-24.6498		28.343	0.5504	4.3136	-3.872	-0.0247	0.1983	-2.4895	-1.6973	2.8109	-19.841		28.344	3.7672	1.0664	-0.2196	2.2678	0.0901	0.0065	0.46	-2.3177	-21.8371		28.328	0.1336	4.9657	-0.5185	-0.0201	3.0869
28.39	4.9914	4.9657	-0.4275	2.5068	0.1022	-0.03	0.1427	4.6701	-24.0147		28.406	0.1857	4.5484	-0.1091	-0.0247	0.5967	-0.0372	0.7138	5.247	-24.922		28.406	0.5634	4.3136	-3.9174	-0.0298	0.1966	-2.5357	-1.8242	3.3238	-19.1151		28.406	3.8323	1.0664	-0.2131	2.3666	0.1176	-0.0057	0.5234	-1.2279	-20.839		28.391	0.1206	5.0309	-0.512	-0.049	3.1916
28.453	4.9132	4.9787	-0.3885	2.3246	0.1107	-0.03	-0.238	5.5676	-23.6518		28.469	0.1727	4.6397	-0.1156	-0.0179	0.5933	-0.0324	1.2214	5.247	-25.6479		28.468	0.5634	4.3136	-3.9564	-0.0179	0.1983	-2.6134	-1.6338	3.3879	-20.5668		28.469	3.9235	1.0664	-0.2131	2.4467	0.085	0.0114	1.3483	-1.0355	-20.9298		28.453	0.1336	5.1091	-0.512	-0.0525	3.3496
28.515	4.8481	4.9918	-0.3625	2.1849	0.1142	-0.0421	-0.6186	4.6701	-22.9259		28.531	0.1987	4.7049	-0.1286	-0.0536	0.6259	-0.0445	1.031	5.5676	-25.7386		28.531	0.5894	4.3136	-3.9954	-0.0059	0.1897	-2.6839	-1.7607	3.1315	-20.2946		28.531	3.9755	1.0664	-0.2001	2.5387	0.1262	0.0016	0.1427	-0.9714	-21.1112		28.516	0.0946	5.1874	-0.5055	-0.0167	3.475
28.578	4.783	4.9918	-0.3366	2.1048	0.1193	-0.03	0.2062	5.1188	-22.3815		28.594	0.1857	4.7701	-0.1351	-0.0502	0.6225	-0.047	0.7138	5.1188	-25.8294		28.593	0.6025	4.3136	-4.0344	-0.0145	0.1949	-2.7374	-1.5704	3.452	-20.2039		28.594	4.0407	1.0664	-0.1936	2.5983	0.0798	-0.0057	0.7772	-1.0997	-21.9278		28.578	0.1206	5.2526	-0.499	-0.0593	3.5901
28.64	4.6918	4.9918	-0.3106	1.9378	0.109	-0.0421	-0.7455	5.0547	-22.3815		28.656	0.1987	4.8614	-0.1351	-0.0605	0.6534	-0.03	0.7138	5.3753	-25.5572		28.656	0.6546	4.2875	-4.0669	0.0009	0.1726	-2.8054	-2.2049	3.3238	-20.0224		28.656	4.1579	1.0794	-0.1936	2.7397	0.1262	0.0041	0.7138	-1.5484	-22.2		28.641	0.1076	5.3178	-0.4925	-0.0405	3.8219
28.703	4.6137	4.9787	-0.2846	1.8595	0.1743	-0.0348	-0.3648	4.4136	-23.0166		28.719	0.2118	4.9527	-0.1416	-0.069	0.6517	-0.03	1.9828	4.9906	-26.4645		28.718	0.6546	4.3006	-4.1124	0.0111	0.1691	-2.8395	-1.8876	3.6443	-19.7502		28.719	4.223	1.0403	-0.1936	2.8164	0.1142	0.0138	0.2696	-1.4843	-20.9298		28.703	0.1076	5.3961	-0.499	-0.0542	3.9868
28.765	4.5486	4.9787	-0.2521	1.6891	0.1434	-0.0348	-0.238	5.3111	-23.1981		28.781	0.2118	5.0439	-0.1546	-0.0485	0.6998	-0.0324	1.729	4.9906	-26.3738		28.781	0.6676	4.3136	-4.1514	0.0196	0.1743	-2.8808	-1.5704	3.8367	-20.4761		28.781	4.2881	1.0533	-0.1936	2.9084	0.097	0.0187	1.0945	-1.292	-22.2908		28.766	0.1206	5.4873	-0.499	-0.0439	4.107
28.828	4.4444	4.9787	-0.2261	1.5801	0.1983	-0.047	-0.3648	5.1829	-23.7425		28.844	0.1987	5.0961	-0.1676	-0.0588	0.7135	-0.0275	2.4269	5.1829	-27.4626		28.843	0.6936	4.3006	-4.1904	0.0469	0.188	-2.9537	-1.3166	3.9649	-19.7502		28.844	4.3793	1.0403	-0.1936	3.0344	0.1142	0.0357	0.7772	-1.4843	-21.9278		28.828	0.1206	5.5656	-0.4925	-0.0405	4.2375
28.89	4.3663	4.9787	-0.2001	1.4523	0.2241	-0.0372	-0.3014	4.7342	-23.0166		28.906	0.1987	5.1874	-0.1676	-0.0332	0.6809	-0.0275	0.5869	5.247	-26.4645		28.906	0.7327	4.3136	-4.2294	0.0452	0.1863	-3.0242	-0.809	4.0931	-20.2946		28.906	4.4574	1.0403	-0.1806	3.1196	0.121	0.0357	0.9041	-1.3561	-23.3796		28.891	0.1336	5.6569	-0.486	-0.0167	4.5088
28.953	4.2621	4.9918	-0.1806	1.3365	0.1863	-0.0372	-0.3014	5.247	-23.3796		28.969	0.1987	5.2917	-0.1741	-0.0264	0.6946	-0.0227	1.2848	5.6958	-28.0977		28.968	0.7978	4.3136	-4.2684	0.0503	0.1812	-3.1165	-2.2049	3.8367	-19.5688		28.969	4.5356	1.0272	-0.1806	3.1997	0.1708	0.0041	0.7772	-1.7407	-20.9298		28.953	0.1206	5.7221	-0.486	-0.0439	4.6325
29.015	4.223	4.9787	-0.1481	1.2615	0.2378	-0.0421	-0.1111	4.7983	-23.3796		29.031	0.2118	5.3308	-0.1806	-0.0536	0.6603	-0.03	0.46	5.3753	-27.644		29.031	0.7978	4.3136	-4.3074	0.0673	0.1812	-3.17	-1.6338	3.5161	-20.1132		29.031	4.6137	1.0272	-0.1806	3.3496	0.1434	0.0114	-0.238	-1.7407	-22.7444		29.016	0.1336	5.7873	-0.486	-0.0337	4.8145
29.078	4.1579	4.9918	-0.1286	1.19	0.2481	-0.047	-0.7455	4.9265	-22.8352		29.094	0.2248	5.4221	-0.1936	-0.0553	0.6826	-0.0397	1.031	5.4394	-28.7328		29.093	0.8108	4.3006	-4.3464	0.0622	0.1245	-3.2599	-1.8242	4.0931	-20.1132		29.094	4.6918	1.0011	-0.2001	3.5046	0.1107	0.0405	0.5869	-2.5741	-22.563		29.078	0.1206	5.8655	-0.486	-0.0201	4.9279
29.14	4.0537	4.9918	-0.0961	1.0366	0.2584	-0.0372	-0.9359	4.9906	-22.8352		29.156	0.2118	5.5134	-0.1936	-0.0298	0.7015	-0.0372	1.031	5.0547	-28.1884		29.156	0.8239	4.3136	-4.3789	0.0605	0.1537	-3.311	-2.2049	3.3238	-20.3854		29.156	4.757	0.9881	-0.1806	3.5591	0.1794	0.0259	0.9041	-2.2536	-22.6537		29.141	0.1206	5.9568	-0.473	-0.0133	5.1065
29.203	3.9886	4.9787	-0.0701	0.9259	0.3014	-0.0372	-0.3648	5.1829	-22.4722		29.219	0.2248	5.5656	-0.2001	-0.0536	0.7462	-0.0251	1.6021	4.8624	-29.0051		29.218	0.8499	4.3136	-4.4244	0.0639	0.1434	-3.4033	-2.2049	3.9649	-19.2966		29.219	4.8351	0.9751	-0.1806	3.6733	0.1537	0.0114	0.46	-1.6766	-22.2908		29.203	0.1336	6.0351	-0.4795	-0.0439	5.237
29.265	3.9235	4.9918	-0.0506	0.8816	0.2533	-0.0421	-0.809	5.1188	-23.1074		29.281	0.2118	5.683	-0.2066	-0.0349	0.7994	-0.0397	1.9828	4.9906	-29.6402		29.281	0.8629	4.3136	-4.4569	0.0758	0.1314	-3.4592	-1.8876	3.7726	-19.5688		29.281	4.9132	0.949	-0.1806	3.7789	0.109	-0.0129	-0.1111	-1.4843	-22.3815		29.266	0.1206	6.1133	-0.473	-0.0456	5.5238
29.328	3.8453	4.9918	-0.0311	0.7999	0.2808	-0.0251	0.1427	5.0547	-22.6537		29.344	0.2118	5.7612	-0.2326	-0.0366	0.7977	-0.03	1.8559	4.8624	-29.6402		29.343	0.8629	4.3136	-4.5023	0.0435	0.1296	-3.5248	-1.2531	3.7726	-20.0224		29.344	5.0044	0.9359	-0.1871	3.9186	0.1502	0.0162	0.3965	-2.2536	-22.4722		29.328	0.1076	6.1785	-0.473	-0.0405	5.8243
29.39	3.7802	4.9918	-0.0051	0.8084	0.2962	-0.0445	-0.7455	5.3111	-22.6537		29.406	0.2248	5.8264	-0.2326	-0.0485	0.7822	-0.0275	1.4117	5.1829	-29.7309		29.406	0.889	4.2875	-4.5283	0.0622	0.1485	-3.5929	-1.38	2.875	-19.841		29.406	5.0695	0.9099	-0.1741	4.0838	0.1279	0.0332	0.2062	-2.1895	-23.3796		29.391	0.1206	6.2568	-0.4795	-0.003	5.9205
29.453	3.676	4.9657	0.0144	0.6874	0.3117	-0.0445	-1.0628	5.3753	-22.563		29.469	0.2118	5.9307	-0.2326	-0.0451	0.7719	-0.0251	1.9828	5.1188	-30.5475		29.468	0.915	4.3267	-4.5673	0.0775	0.1468	-3.6585	-1.1897	3.5802	-20.2946		29.469	5.1346	0.8838	-0.1806	4.1554	0.1348	-0.0057	0.0158	-1.9972	-23.3796		29.453	0.1206	6.322	-0.473	-0.0048	6.1386
29.515	3.6239	4.9918	0.0339	0.5937	0.3134	-0.0518	-1.1262	5.4394	-22.2908		29.531	0.2248	6.022	-0.2326	-0.0281	0.7891	-0.0372	1.4752	5.247	-30.2753		29.531	0.915	4.3136	-4.6063	0.0912	0.109	-3.7654	-1.0628	3.1956	-20.2039		29.531	5.1998	0.8447	-0.1741	4.2372	0.1623	0.0065	0.2696	-2.2536	-21.9278		29.516	0.1206	6.4002	-0.4665	-0.0099	6.2571
29.578	3.5328	4.9918	0.0534	0.5426	0.2928	-0.047	-0.6186	5.9522	-23.3796		29.594	0.2248	6.1133	-0.2326	-0.0468	0.8355	-0.0348	1.8559	4.9906	-30.4568		29.593	0.9411	4.3136	-4.6518	0.0861	0.1417	-3.8067	-0.809	2.8109	-19.3873		29.594	5.3039	0.8447	-0.1741	4.3854	0.0884	0.0016	0.46	-2.3177	-23.924		29.578	0.1336	6.4654	-0.4665	0.0089	6.5473
29.64	3.4676	4.9918	0.0664	0.4114	0.3254	-0.0348	-0.809	5.6317	-22.9259		29.656	0.2248	6.1785	-0.2521	-0.0349	0.8509	-0.03	1.6021	4.9906	-30.0939		29.656	0.9541	4.3006	-4.6713	0.1065	0.121	-3.8894	-2.0145	2.7468	-19.9317		29.656	5.3821	0.8186	-0.1611	4.5319	0.1262	-0.0129	0.3331	-1.6766	-22.8352		29.641	0.1076	6.5698	-0.4665	-0.0116	6.719
29.703	3.3895	4.9787	0.0859	0.3876	0.3426	-0.03	-0.6186	5.824	-22.563		29.719	0.2248	6.2568	-0.2456	-0.0264	0.8526	-0.0421	1.9193	5.4394	-31.0012		29.718	0.9541	4.3006	-4.7038	0.0997	0.1314	-3.9671	-1.0628	2.8109	-20.3854		29.719	5.4602	0.8186	-0.1546	4.6205	0.164	0.0114	0.1427	-2.3818	-22.2908		29.703	0.1206	6.635	-0.4665	-0.0473	6.8375
29.765	3.2853	4.9918	0.0989	0.3791	0.3271	-0.0445	-1.1262	5.4394	-22.8352		29.781	0.2248	6.322	-0.2456	-0.0417	0.8956	-0.0275	2.0462	5.3111	-31.1827		29.781	0.9801	4.3006	-4.7363	0.0809	0.1125	-4.0279	-0.9993	2.875	-19.9317		29.781	5.5123	0.7794	-0.1611	4.7738	0.1365	0.0016	0.7772	-1.9972	-22.6537		29.766	0.1336	6.7263	-0.46	-0.049	7.0865
29.828	3.2332	4.9918	0.0989	0.3263	0.3323	-0.03	-1.1897	4.9906	-22.4722		29.844	0.2248	6.4133	-0.2521	-0.0145	0.8956	-0.0324	2.2366	5.3753	-30.9105		29.843	0.9932	4.3136	-4.7688	0.1099	0.0901	-4.1105	-1.3166	3.0674	-20.4761		29.844	5.5774	0.7794	-0.1741	4.922	0.1417	0.0187	0.9676	-2.4459	-23.924		29.828	0.1206	6.7784	-0.4795	-0.0422	7.2892
29.89	3.142	4.9918	0.0989	0.2803	0.3409	-0.0397	-1.5069	4.6701	-22.4722		29.906	0.2378	6.4785	-0.2456	-0.0383	0.9093	-0.047	1.7924	5.9522	-32.1807		29.906	0.9932	4.3267	-4.8013	0.1014	0.1056	-4.181	-1.9511	3.3238	-19.2966		29.906	5.6556	0.7534	-0.1676	5.0396	0.0884	0.0211	-0.238	-3.0229	-23.1074		29.891	0.1206	6.8436	-0.4795	-0.0371	7.5485
29.953	3.0639	4.9918	0.1119	0.2615	0.3357	-0.0372	-1.6973	4.8624	-22.6537		29.969	0.2248	6.5828	-0.2586	-0.0315	0.9505	-0.047	1.4752	5.6317	-30.8197		29.968	0.9932	4.3006	-4.8403	0.0895	0.0901	-4.2418	-1.1262	3.3879	-20.1132		29.969	5.7337	0.7273	-0.1676	5.1503	0.1382	-0.0227	-0.1745	-2.7024	-23.561		29.953	0.1206	6.9349	-0.473	-0.0644	7.7546
30.015	2.9858	4.9918	0.1314	0.1474	0.3477	-0.03	-0.6821	5.3753	-23.2888		30.031	0.2248	6.648	-0.2521	-0.0792	0.9986	-0.0518	2.4904	5.5035	-31.9085		30.031	1.0192	4.3006	-4.8728	0.1082	0.1022	-4.322	-1.9511	2.8109	-19.841		30.031	5.7988	0.7142	-0.1676	5.2815	0.1743	0.0114	0.3965	-2.7665	-22.9259		30.016	0.1336	7.0001	-0.473	-0.0235	7.6309
30.078	2.9076	4.9787	0.1574	0.0878	0.3185	-0.0324	-1.1262	5.824	-22.563		30.094	0.2378	6.7263	-0.2586	-0.0349	1.033	-0.0445	2.1731	5.824	-31.4549		30.093	1.0322	4.2745	-4.9118	0.1184	0.1022	-4.39	-1.38	3.3879	-19.3873		30.094	5.877	0.7012	-0.1741	5.5012	0.1107	0.0259	0.3331	-2.0613	-23.7425		30.078	0.1076	7.0132	-0.473	-0.0507	7.5039
30.14	2.8295	4.9787	0.1834	0.0673	0.3254	-0.0372	-1.5704	5.8881	-22.6537		30.156	0.2508	6.8045	-0.2586	-0.0553	1.0123	-0.0202	2.7442	5.6317	-31.8178		30.156	1.0713	4.3136	-4.9508	0.1099	0.1107	-4.4289	-0.9993	3.2597	-20.1132		30.156	5.9421	0.7012	-0.1806	5.6205	0.0524	0.0065	0.6503	-1.869	-23.924		30.141	0.0946	6.9871	-0.4535	-0.0456	7.0316
30.203	2.7513	4.9787	0.1704	0.0878	0.3323	-0.0567	-0.8724	5.5676	-23.3796		30.219	0.2248	6.9088	-0.2521	-0.0468	0.9969	-0.0251	1.9828	5.1188	-31.9085		30.218	1.0713	4.3136	-4.9768	0.1372	0.0867	-4.5383	-1.7607	3.1315	-19.7502		30.219	6.0333	0.6621	-0.1936	5.7602	0.1794	0.0041	0.0158	-2.3818	-22.2		30.203	0.1336	6.9349	-0.434	-0.0167	6.6521
30.265	2.6602	4.9396	0.1574	0.0809	0.3426	-0.0251	-0.9993	4.9265	-23.2888		30.281	0.2378	6.9871	-0.2586	-0.0025	1.0003	-0.0348	1.5386	5.0547	-31.9085		30.281	1.1104	4.3006	-5.0028	0.1218	0.0987	-4.5699	-1.38	3.1315	-19.9317		30.281	6.1114	0.649	-0.2001	5.9118	0.1159	0.0138	0.5234	-2.3818	-23.3796		30.266	0.1206	6.8567	-0.434	-0.0184	6.513
30.328	2.582	4.8874	0.1379	0.0724	0.3271	-0.0202	-1.38	5.4394	-23.1981		30.344	0.2248	7.0653	-0.2586	-0.0179	1.0913	-0.0324	1.6655	4.6701	-31.3641		30.343	1.1234	4.3136	-5.0353	0.1849	0.0695	-4.6501	-1.5069	3.5161	-20.1132		30.344	6.2026	0.649	-0.2196	6.0498	0.1966	-0.0008	0.0158	-3.4075	-22.6537		30.328	0.1206	6.7915	-0.473	-0.015	6.1935
30.39	2.5039	4.8614	0.1379	0.0247	0.3443	-0.0348	-1.1897	5.1188	-23.1074		30.406	0.2378	7.1175	-0.2586	-0.0451	1.16	-0.0445	2.3	5.6958	-32.09		30.406	1.1364	4.3006	-5.0743	0.1627	0.085	-4.7813	-1.6338	2.3622	-19.5688		30.406	6.2807	0.623	-0.2196	6.2815	0.1657	-0.0129	0.46	-3.3434	-23.4703		30.391	0.1206	6.7132	-0.4795	-0.032	5.668
30.453	2.4258	4.8092	0.1509	-0.0519	0.3254	-0.0397	-2.078	6.1446	-22.0186		30.469	0.2248	7.2218	-0.2586	0.006	1.2184	-0.0397	2.8711	4.8624	-31.6363		30.468	1.1234	4.3267	-5.1132	0.1252	0.0953	-4.8251	-1.3166	3.3238	-20.3854		30.469	6.3458	0.623	-0.2326	6.4195	0.0884	0.0162	0.3331	-3.3434	-23.2888		30.453	0.1206	6.635	-0.4405	-0.0507	5.4053
30.515	2.3476	4.744	0.1444	-0.0451	0.3151	-0.0275	-0.9993	5.9522	-22.6537		30.531	0.2378	7.3001	-0.2521	-0.0247	1.2356	-0.03	2.7442	5.7599	-32.1807		30.531	1.1364	4.3006	-5.1457	0.1235	0.097	-4.8858	-1.1897	2.6827	-19.9317		30.531	6.437	0.5969	-0.2521	6.5472	0.1829	-0.0105	0.5234	-2.6382	-23.2888		30.516	0.1076	6.5828	-0.4145	-0.0473	5.0103
30.578	2.2564	4.7179	0.1509	-0.0315	0.3495	-0.03	-0.4917	5.3111	-22.8352		30.594	0.2248	7.3914	-0.2586	-0.0196	1.227	-0.047	2.3635	5.3753	-31.6363		30.593	1.1364	4.3006	-5.1782	0.1355	0.0747	-5.0171	-1.5069	3.0033	-20.4761		30.594	6.5021	0.6099	-0.2586	6.7142	0.1588	0.0211	0.0793	-2.3177	-23.561		30.578	0.1206	6.4785	-0.4405	-0.0371	4.7218
30.64	2.1653	4.6788	0.1184	0.006	0.3185	-0.0227	-1.5704	4.9906	-22.8352		30.656	0.2508	7.4827	-0.2651	-0.0315	1.2699	-0.0397	2.3635	5.3753	-32.1807		30.656	1.1495	4.3136	-5.2237	0.132	0.0712	-5.0997	-1.1897	3.3238	-19.6595		30.656	6.5542	0.5969	-0.2651	6.8232	0.1485	0.0016	0.0793	-3.5999	-24.3776		30.641	0.1336	6.4263	-0.4535	-0.0473	4.7218
30.703	2.0741	4.6527	0.1054	-0.0349	0.3254	-0.0397	-1.5069	5.0547	-22.4722		30.719	0.2378	7.5739	-0.2651	-0.023	1.3026	-0.03	2.1097	5.3753	-32.3622		30.718	1.1755	4.3267	-5.2627	0.1576	0.073	-5.1653	-0.9359	2.9392	-19.5688		30.719	6.6584	0.5708	-0.2716	7.0702	0.1949	-0.0081	0.5234	-3.4075	-23.561		30.703	0.1076	6.322	-0.4405	-0.0559	4.4178
30.765	1.996	4.6266	0.0924	-0.0383	0.3495	-0.0348	-0.5552	5.3753	-22.7444		30.781	0.2378	7.6522	-0.2586	-0.04	1.3678	-0.0591	1.6021	5.3753	-32.4529		30.781	1.1755	4.2875	-5.3017	0.1712	0.0627	-5.2577	-1.8242	2.9392	-19.9317		30.781	6.7365	0.5577	-0.2911	7.2099	0.1262	0.0065	0.2696	-4.0486	-24.2869		30.766	0.1206	6.2437	-0.4405	-0.0388	4.0297
30.828	1.9309	4.6136	0.0989	-0.0996	0.3185	-0.0227	-1.7607	6.0804	-22.9259		30.844	0.2248	7.7174	-0.2586	-0.0145	1.4451	-0.0445	2.6807	4.9265	-32.4529		30.843	1.1885	4.3136	-5.3277	0.161	0.0661	-5.3379	-2.2683	3.6443	-20.2039		30.844	6.7886	0.5708	-0.3041	7.3803	0.1125	-0.0057	0.2696	-3.9204	-23.3796		30.828	0.1336	6.1916	-0.4535	-0.0388	3.724
30.89	1.8527	4.5875	0.1119	-0.132	0.3512	-0.0348	-1.1897	6.6574	-22.3815		30.906	0.2378	7.7956	-0.2651	-0.0298	1.5567	-0.0397	3.0614	5.0547	-33.0881		30.906	1.1885	4.3136	-5.3732	0.1746	0.0455	-5.4132	-1.7607	2.875	-21.202		30.906	6.8798	0.5577	-0.3106	7.5268	0.1468	-0.0154	0.3331	-3.087	-23.7425		30.891	0.1076	6.1264	-0.4405	-0.0252	3.6519
30.953	1.7616	4.5484	0.1249	-0.1337	0.3151	-0.0178	-1.8876	5.9522	-22.4722		30.969	0.2378	7.8869	-0.2586	-0.0213	1.5585	-0.0445	2.8076	5.3111	-33.0881		30.968	1.2276	4.3006	-5.3992	0.1797	0.0609	-5.525	-1.0628	2.8109	-20.9298		30.969	6.9579	0.5447	-0.3301	7.738	0.0644	0.0114	0.3331	-3.8563	-22.9259		30.953	0.0946	6.022	-0.4275	-0.061	3.5196
31.015	1.6834	4.5223	0.1184	-0.115	0.3306	-0.0421	-0.1745	6.0163	-22.3815		31.031	0.2378	7.9652	-0.2586	-0.023	1.5842	-0.0324	2.998	5.1188	-33.6325		31.031	1.2276	4.3136	-5.4382	0.1797	0.0609	-5.5785	-1.1262	2.875	-20.1132		31.031	7.023	0.5447	-0.3301	7.6971	0.1777	-0.0081	0.9041	-2.1254	-22.9259		31.016	0.1076	5.9568	-0.46	-0.0542	3.4132
31.078	1.6053	4.4962	0.0989	-0.0536	0.3065	-0.0445	-1.4435	5.7599	-22.6537		31.094	0.2378	8.0565	-0.2651	-0.0145	1.6478	-0.0397	1.5386	5.5676	-33.6325		31.093	1.2276	4.3136	-5.4837	0.178	0.0558	-5.6635	-0.8724	2.875	-19.2966		31.094	7.023	0.5447	-0.3366	7.4229	0.1382	0.0089	0.7772	-0.0739	-22.9259		31.078	0.1336	5.8916	-0.46	-0.1138	3.1264
31.14	1.5011	4.4832	0.0664	-0.0775	0.2893	-0.03	-1.5069	5.4394	-23.1074		31.156	0.2378	8.1347	-0.2586	-0.0332	1.7113	-0.0445	1.7924	5.6958	-33.1788		31.156	1.2276	4.3136	-5.5162	0.1644	0.0558	-5.7729	-1.6338	2.7468	-20.839		31.156	6.997	0.5317	-0.3236	6.8982	0.1863	-0.0178	0.3965	-0.4586	-20.9298		31.141	0.1076	5.8134	-0.434	-0.0388	2.8653
31.203	1.449	4.4701	0.0664	-0.1201	0.322	-0.0372	-0.5552	5.7599	-23.4703		31.219	0.2378	8.213	-0.2521	-0.0298	1.7663	-0.0445	1.6021	5.6317	-32.9066		31.218	1.2276	4.3136	-5.5487	0.1525	0.0575	-5.8458	-1.6973	2.9392	-19.5688		31.219	6.9189	0.5317	-0.3041	6.6034	0.1331	-0.0032	0.46	-1.9331	-18.6614		31.203	0.1206	5.7221	-0.447	-0.0456	2.7623
31.265	1.3709	4.4701	0.0794	-0.1133	0.3082	-0.0202	-1.4435	6.0163	-23.0166		31.281	0.2378	8.2912	-0.2586	-0.0451	1.9294	-0.0445	2.9345	5.3111	-32.1807		31.281	1.2406	4.3267	-5.5942	0.2036	0.0506	-5.909	-1.3166	2.9392	-20.1132		31.281	6.8668	0.5186	-0.2976	6.6511	0.1777	-0.0105	-0.1111	-5.2026	-16.2116		31.266	0.1336	5.6569	-0.4665	-0.0678	2.6301
31.328	1.2797	4.431	0.1054	-0.1473	0.3014	-0.0324	-2.3952	6.2087	-22.9259		31.344	0.2378	8.3695	-0.2651	-0.0179	2.0393	-0.0494	3.6325	5.1188	-32.9973		31.343	1.2797	4.3136	-5.6267	0.2206	0.0644	-5.9892	-1.6973	2.6827	-20.2039		31.344	6.8016	0.5056	-0.2846	6.2985	0.1073	0.0162	0.5234	-3.0229	-17.9356		31.328	0.1206	5.5656	-0.4535	-0.0405	2.582
31.39	1.2015	4.444	0.1184	-0.1644	0.346	-0.047	-0.6821	5.7599	-23.2888		31.406	0.2378	8.4477	-0.2651	-0.0196	2.1166	-0.0737	3.3787	4.8624	-32.9973		31.406	1.2797	4.3267	-5.6527	0.1917	0.0558	-6.0816	-1.7607	3.5161	-20.839		31.406	6.7365	0.4925	-0.2651	5.6511	0.1039	-0.0032	0.7138	1.7852	-17.6634		31.391	0.1076	5.4873	-0.447	-0.0235	2.4171
31.453	1.1104	4.431	0.0924	-0.1099	0.3185	-0.0494	-1.7607	5.5676	-23.1074		31.469	0.2378	8.552	-0.2586	-0.0196	2.175	-0.0397	3.5056	5.3753	-33.9047		31.468	1.3057	4.3136	-5.6916	0.2309	0.0644	-6.1423	-0.9993	3.7726	-20.2039		31.469	6.6714	0.4795	-0.2586	5.7074	0.1331	0.0187	-0.0476	0.503	-16.6653		31.453	0.1336	5.4091	-0.473	-0.0184	2.2231
31.515	1.0453	4.444	0.0599	-0.0945	0.31	-0.0324	-1.5704	5.1188	-23.4703		31.531	0.2248	8.6042	-0.2651	-0.0059	2.2162	-0.0251	1.8559	5.5035	-33.7232		31.531	1.3448	4.3006	-5.7436	0.282	0.0644	-6.2152	-1.0628	4.2213	-20.3854		31.531	6.5802	0.4795	-0.2326	5.6085	0.1056	-0.0154	0.7138	-1.9331	-14.3062		31.516	0.1206	5.3308	-0.46	-0.0422	2.0273
31.578	0.9541	4.444	0.0209	-0.1099	0.3288	-0.0421	-1.1897	5.5035	-23.2888		31.594	0.2378	8.6694	-0.2586	0.0111	2.3433	-0.0421	2.5538	5.3111	-34.6305		31.593	1.3709	4.3267	-5.7826	0.253	0.0386	-6.2881	-1.4435	3.3238	-19.3873		31.594	6.5151	0.4665	-0.2261	5.3104	0.1382	0.0041	0.46	-2.1895	-13.5803		31.578	0.1206	5.2526	-0.46	-0.0473	1.9775
31.64	0.876	4.431	0.0144	-0.1456	0.31	-0.0372	-2.1414	5.3111	-23.1074		31.656	0.2378	8.7477	-0.2651	0.0128	2.4755	-0.0567	2.9345	5.6958	-33.1788		31.656	1.3709	4.3136	-5.8086	0.2564	0.0352	-6.3708	-1.6973	3.3238	-20.1132		31.656	6.437	0.4795	-0.2066	4.9629	0.0455	-0.0008	0.3331	-0.2663	-14.6691		31.641	0.1206	5.1874	-0.473	-0.0439	1.9637
31.703	0.7848	4.444	0.0274	-0.1644	0.3117	-0.0518	-1.1262	5.9522	-23.4703		31.719	0.2378	8.8259	-0.2586	-0.0059	2.6421	-0.0397	3.6959	5.4394	-33.9047		31.718	1.3839	4.3267	-5.8476	0.2513	0.0472	-6.4801	-1.3166	3.7084	-19.5688		31.719	6.3849	0.4925	-0.2066	4.7261	0.0678	-0.0008	0.8407	-0.138	-13.1267		31.703	0.1336	5.1091	-0.4795	-0.0797	1.8865
31.765	0.6936	4.444	0.0534	-0.1831	0.3271	-0.0348	-1.0628	5.8881	-24.5591		31.781	0.2378	8.9042	-0.2651	0.0026	2.7091	-0.0372	3.9497	5.1829	-33.451		31.781	1.3709	4.3136	-5.8801	0.2428	0.0592	-6.5239	-0.8724	4.1572	-19.841		31.781	6.3198	0.4795	-0.1741	4.5796	0.1056	-0.0057	-0.238	0.8236	-12.9452		31.766	0.1076	5.0439	-0.4665	-0.061	1.7783
31.828	0.6285	4.431	0.0534	-0.1678	0.3048	-0.0518	-2.078	5.3753	-24.3776		31.844	0.2248	8.9824	-0.2716	0.0281	2.8138	-0.047	3.3787	5.247	-33.9954		31.843	1.3839	4.3006	-5.9126	0.2837	0.0695	-6.6065	-1.0628	2.9392	-19.7502		31.844	6.2286	0.4795	-0.1741	4.4212	0.1004	-0.0057	0.0793	-0.2663	-12.3101		31.828	0.1336	4.9657	-0.473	0.0055	1.6083
31.89	0.5634	4.444	0.0209	-0.149	0.3443	-0.0494	-0.8724	5.824	-24.8313		31.906	0.2378	9.0737	-0.2716	-0.0008	2.9048	-0.0397	3.5056	5.3753	-34.4491		31.906	1.3839	4.3006	-5.9581	0.2513	0.0815	-6.728	-0.9993	3.0033	-21.0205		31.906	6.1635	0.4795	-0.1806	4.2917	0.0558	-0.0057	1.1579	-1.2279	-11.1305		31.891	0.1336	4.8744	-0.486	-0.0593	1.4983
31.953	0.4592	4.431	0.0079	-0.0996	0.3323	-0.0372	-1.0628	5.6317	-24.2869		31.969	0.2378	9.178	-0.2716	-0.0059	2.9993	-0.0543	3.1883	5.5676	-33.2695		31.968	1.3969	4.3006	-5.9906	0.2564	0.0695	-6.7839	-1.4435	3.0674	-20.3854		31.969	6.0593	0.4795	-0.1741	4.1827	0.1245	0.0065	1.4117	-0.8432	-11.5842		31.953	0.1206	4.7962	-0.473	-0.0286	1.4743
32.015	0.3811	4.444	-0.0181	-0.1746	0.3048	-0.0421	-1.7607	5.824	-24.8313		32.031	0.2378	9.2563	-0.2846	0.0009	3.0989	-0.0494	3.7594	5.8881	-34.4491		32.031	1.3969	4.3006	-6.0296	0.2683	0.0644	-6.8641	-1.5069	3.2597	-19.478		32.031	5.9812	0.4795	-0.1676	3.922	0.0712	0.0114	0.2062	0.6313	-11.4935		32.016	0.1206	4.7179	-0.4795	-0.0473	1.3661
32.078	0.2899	4.444	0.0014	-0.2172	0.2962	-0.0348	-0.8724	6.7215	-25.0128		32.094	0.2378	9.3215	-0.2846	-0.0042	3.2724	-0.0543	4.4573	5.6958	-34.2676		32.093	1.4099	4.3136	-6.0751	0.2462	0.073	-6.9346	-1.0628	3.5802	-20.9298		32.094	5.9291	0.4795	-0.1611	3.6767	0.0781	0.0138	0.9676	0.7595	-11.7657		32.078	0.1336	4.6397	-0.4925	-0.0269	1.3318
32.14	0.2118	4.444	0.0339	-0.2359	0.3151	-0.0494	-1.5069	5.824	-25.3757		32.156	0.2378	9.3997	-0.2846	0.0196	3.3788	-0.0591	4.0132	5.247	-34.2676		32.156	1.4229	4.3267	-6.1141	0.2769	0.0764	-7.0391	-1.3166	3.5802	-20.2039		32.156	5.8379	0.4925	-0.1481	3.5864	0.1039	0.0284	0.46	0.3748	-10.9491		32.141	0.1206	4.5614	-0.486	-0.0354	1.2339
32.203	0.1336	4.4571	0.0339	-0.2121	0.3254	-0.0251	-1.2531	6.7215	-25.3757		32.219	0.2378	9.4649	-0.2781	0.0298	3.5471	-0.0348	4.2035	5.1829	-34.7213		32.218	1.436	4.3136	-6.1531	0.3058	0.0712	-7.1363	-1.5704	2.8109	-20.2039		32.219	5.7728	0.4795	-0.1481	3.4927	0.0644	0.0138	0.5234	-0.2021	-10.9491		32.203	0.1206	4.4701	-0.4795	-0.0388	1.1995
32.265	0.0425	4.444	0.0404	-0.1763	0.3134	-0.0227	-0.9359	5.5035	-24.922		32.281	0.2378	9.5301	-0.2846	0.0128	3.5952	-0.0445	3.6325	6.0163	-35.0842		32.281	1.449	4.3136	-6.1921	0.3041	0.0558	-7.2068	-1.0628	3.452	-20.4761		32.281	5.6816	0.4925	-0.1416	3.4416	0.0541	0.0211	1.729	-1.4202	-11.1305		32.266	0.1206	4.3919	-0.499	0.0072	1.1429
32.328	-0.0487	4.444	-0.0116	-0.1303	0.2911	-0.0275	-2.1414	5.1829	-25.9201		32.344	0.2378	9.6214	-0.2846	-0.0008	3.7979	-0.0372	3.7594	5.7599	-34.9027		32.343	1.475	4.3267	-6.2441	0.3211	0.0592	-7.3065	-1.4435	3.5802	-19.6595		32.344	5.6165	0.5186	-0.1546	3.307	0.1142	0.0308	1.4752	-0.9073	-11.2213		32.328	0.1206	4.3267	-0.4925	-0.0388	1.0793
32.39	-0.1268	4.444	-0.0636	-0.1269	0.3082	-0.047	-0.8724	5.1829	-25.7386		32.406	0.2248	9.6997	-0.2846	0.0043	3.8854	-0.0445	3.9497	5.824	-35.6286		32.406	1.475	4.3006	-6.283	0.3211	0.073	-7.377	-1.7607	3.0033	-19.6595		32.406	5.5384	0.5317	-0.1481	3.1196	0.0558	-0.0008	0.3965	0.5672	-11.7657		32.391	0.1206	4.2484	-0.4925	-0.0235	0.9711
32.453	-0.205	4.444	-0.0701	-0.1933	0.31	-0.0421	-0.8724	5.6958	-26.7367		32.469	0.2248	9.7649	-0.2911	0.0111	4.0709	-0.0372	4.9649	5.6958	-35.4471		32.468	1.5011	4.3136	-6.3155	0.3211	0.0627	-7.5009	-1.5704	2.9392	-20.4761		32.469	5.4863	0.5708	-0.1416	2.9697	0.097	-0.0057	1.031	0.9518	-11.4027		32.453	0.1336	4.1702	-0.499	0.0004	0.9608
32.515	-0.2831	4.444	-0.0441	-0.2734	0.3254	-0.0275	-1.0628	6.1446	-26.646		32.531	0.2378	9.8431	-0.2976	0.0128	4.1585	-0.0543	4.5842	5.3111	-34.4491		32.531	1.5011	4.3267	-6.361	0.3246	0.0524	-7.5641	-0.9359	3.9649	-20.4761		32.531	5.4081	0.5838	-0.1416	2.8658	0.0644	-0.0129	0.3965	0.4389	-10.6769		32.516	0.1206	4.0658	-0.5055	-0.0286	0.887
32.578	-0.3482	4.431	-0.0051	-0.2802	0.3151	-0.0494	-0.9359	7.1703	-27.7348		32.594	0.2378	9.9214	-0.2976	0.0179	4.3388	-0.0421	5.0918	4.9265	-35.1749		32.593	1.5011	4.3136	-6.4195	0.3194	0.0644	-7.6297	-0.9993	3.1315	-20.0224		32.594	5.343	0.5969	-0.1416	2.8028	0.0524	-0.0227	0.5234	-0.3304	-11.4027		32.578	0.1206	4.0006	-0.4925	-0.0559	0.8526
32.64	-0.4394	4.444	0.0144	-0.2836	0.3151	-0.0494	-1.2531	6.3369	-27.0996		32.656	0.2248	9.9996	-0.2976	0.0213	4.4487	-0.0543	4.5208	4.9906	-36.2637		32.656	1.5271	4.3136	-6.452	0.3194	0.0815	-7.7439	-0.4917	3.5161	-19.6595		32.656	5.2519	0.5969	-0.1481	2.7329	0.0644	0.0016	0.8407	-0.5227	-10.2232		32.641	0.1206	3.9354	-0.4925	-0.0286	0.8217
32.703	-0.5436	4.431	0.0209	-0.2479	0.31	-0.0105	-1.1262	5.9522	-27.7348		32.719	0.2378	10.0648	-0.2976	0.0366	4.6256	-0.0275	3.9497	5.3111	-35.4471		32.718	1.5271	4.3006	-6.478	0.3586	0.0936	-7.6807	-0.6186	3.6443	-20.6576		32.719	5.1998	0.623	-0.1481	2.5864	0.0506	-0.0032	0.6503	-0.2021	-10.3139		32.703	0.1206	3.8572	-0.499	-0.0082	0.7908
32.765	-0.6087	4.444	-0.0376	-0.1814	0.3151	-0.0348	-0.809	5.6317	-27.3718		32.781	0.2248	10.1561	-0.3041	0.0401	4.7527	-0.0543	3.9497	5.5676	-36.5359		32.781	1.5271	4.3136	-6.4715	0.3348	0.0627	-7.5957	-1.1897	3.1956	-20.3854		32.781	5.1216	0.623	-0.1416	2.4007	0.0455	0.0065	0.5869	0.2466	-11.7657		32.766	0.1206	3.7529	-0.499	-0.0422	0.729
32.828	-0.6869	4.4571	-0.0961	-0.1831	0.2996	-0.03	-1.5069	4.5419	-27.5533		32.844	0.2378	10.2344	-0.3041	0.0349	4.9124	-0.0445	5.2187	5.9522	-34.9935		32.843	1.5271	4.3006	-6.4455	0.3246	0.073	-7.3575	-1.6973	3.8367	-21.3834		32.844	5.0174	0.6621	-0.1416	2.3121	0.0695	0.0041	0.9676	1.0159	-10.9491		32.828	0.1206	3.6746	-0.499	-0.0439	0.662
32.89	-0.752	4.4571	-0.1091	-0.2496	0.2808	-0.03	-0.6821	6.0163	-28.4606		32.906	0.2248	10.2865	-0.3041	0.0315	5.0944	-0.0397	4.7111	5.824	-35.4471		32.906	1.5271	4.3006	-6.413	0.3041	0.0833	-7.1728	-0.9993	3.5161	-20.839		32.906	4.9653	0.6621	-0.1351	2.2184	0.0403	0.0187	0.3965	1.08	-10.5861		32.891	0.1206	3.5964	-0.5055	-0.0116	0.5813
32.953	-0.8301	4.444	-0.0961	-0.3194	0.2859	-0.0664	-1.1897	5.3753	-29.0051		32.969	0.2248	10.3648	-0.3106	0.0469	5.1889	-0.0421	4.267	5.7599	-35.0842		32.968	1.5271	4.3136	-6.3805	0.299	0.109	-6.9784	-0.4917	3.9008	-21.4742		32.969	4.8742	0.6751	-0.1351	2.1826	0.0798	-0.0008	0.7772	-0.4586	-9.6788		32.953	0.1206	3.5312	-0.499	-0.0269	0.6174
33.015	-0.9213	4.431	-0.0766	-0.3364	0.2584	-0.0372	-1.2531	6.7215	-27.7348		33.031	0.2118	10.443	-0.3041	0.0094	5.3435	-0.0494	4.0766	5.824	-35.6286		33.031	1.5271	4.3006	-6.335	0.3041	0.0936	-6.8787	-1.0628	3.7084	-21.5649		33.031	4.8091	0.7142	-0.1416	2.1554	0.0386	-0.0008	1.4117	-0.5868	-11.312		33.016	0.1206	3.4529	-0.499	-0.0133	0.5967
33.078	-1.0124	4.431	-0.0506	-0.3586	0.3151	-0.0445	-1.2531	6.4651	-28.8236		33.094	0.2248	10.5213	-0.3171	0.0401	5.577	-0.0397	4.4573	5.6958	-36.0823		33.093	1.5141	4.3136	-6.3025	0.282	0.1125	-6.6381	-0.809	3.8367	-21.3834		33.094	4.7179	0.7142	-0.1416	2.0072	0.0609	-0.0178	0.5234	-0.2021	-11.4027		33.078	0.1206	3.3747	-0.512	-0.0082	0.5744
33.14	-1.0906	4.444	-0.0441	-0.3705	0.279	-0.047	-0.9993	6.4651	-29.0051		33.156	0.2118	10.5995	-0.3236	0.0418	5.7299	-0.0494	3.7594	5.3753	-35.2657		33.156	1.5271	4.3136	-6.27	0.2786	0.1365	-6.4607	-0.6821	4.606	-21.5649		33.156	4.6658	0.7534	-0.1351	1.8504	0.0712	0.0114	0.2696	-0.0739	-11.4027		33.141	0.1206	3.2834	-0.512	-0.0184	0.5195
33.203	-1.1687	4.444	-0.0571	-0.3433	0.2584	-0.0348	-1.2531	5.4394	-29.5495		33.219	0.2248	10.6647	-0.3236	0.0486	5.9188	-0.0591	3.7594	5.6317	-35.8101		33.218	1.5402	4.3006	-6.2376	0.27	0.1417	-6.3927	-0.809	4.3495	-21.3834		33.219	4.5877	0.7794	-0.1351	1.7482	0.0815	-0.0154	-0.0476	0.6313	-11.2213		33.203	0.1336	3.2182	-0.512	-0.0286	0.516
33.265	-1.2599	4.444	-0.0766	-0.345	0.2498	-0.03	-0.7455	5.4394	-30.0031		33.281	0.2248	10.7821	-0.3236	0.0486	6.0561	-0.0543	5.7897	6.1446	-36.4452		33.281	1.5271	4.3006	-6.1856	0.2854	0.1296	-6.2444	-1.1897	4.3495	-21.1112		33.281	4.5095	0.7925	-0.1416	1.6545	0.0524	0.0211	1.4117	0.5672	-10.4954		33.266	0.1206	3.1269	-0.5185	-0.0167	0.425
33.328	-1.338	4.431	-0.0896	-0.4318	0.2241	-0.0397	-1.3166	5.5035	-29.4587		33.344	0.2118	10.8343	-0.3301	0.0179	6.2554	-0.0737	5.1552	5.3753	-36.0823		33.343	1.5271	4.3136	-6.1661	0.2462	0.1554	-6.0937	-0.809	4.4777	-21.8371		33.344	4.4053	0.8055	-0.1351	1.675	0.1176	0.0259	0.0793	-0.0098	-10.4954		33.328	0.1076	3.0617	-0.512	-0.032	0.4405
33.39	-1.4031	4.444	-0.0831	-0.4812	0.2395	-0.0421	-0.8724	6.2087	-29.4587		33.406	0.2248	10.8995	-0.3366	0.0281	6.403	-0.0543	5.2821	5.7599	-35.7193		33.406	1.5662	4.3136	-6.1401	0.2649	0.1468	-5.9795	-0.9359	4.9906	-21.6556		33.406	4.3272	0.8186	-0.1416	1.5949	0.0541	0.0016	0.0793	-0.3945	-11.4935		33.391	0.1206	2.9704	-0.5185	-0.0167	0.4284
33.453	-1.4943	4.444	-0.0701	-0.5681	0.2207	-0.0397	-0.7455	7.3626	-29.8217		33.469	0.1987	10.9908	-0.3366	0.0298	6.6761	-0.0518	5.8532	5.3111	-35.9915		33.468	1.5271	4.3136	-6.1011	0.2564	0.1485	-5.8094	-1.4435	4.4777	-20.9298		33.469	4.236	0.8316	-0.1351	1.4808	0.1279	0.0041	0.1427	-0.0739	-10.6769		33.453	0.1206	2.8791	-0.525	-0.0337	0.4388
33.515	-1.5725	4.444	-0.0506	-0.6226	0.231	-0.0421	-0.4283	7.2985	-29.9124		33.531	0.1987	11.056	-0.3366	0.0315	6.8599	-0.0616	5.2821	5.7599	-35.8101		33.531	1.5271	4.3136	-6.0686	0.2581	0.1537	-5.7146	-0.9359	4.606	-21.7464		33.531	4.1839	0.8577	-0.1416	1.4058	0.0627	0.0187	-0.1111	0.4389	-11.0398		33.516	0.1206	2.7878	-0.538	-0.0525	0.3718
33.578	-1.6506	4.431	-0.0441	-0.6243	0.188	-0.03	-0.6186	6.7215	-30.4568		33.594	0.1987	11.1342	-0.3431	0.0384	6.956	-0.0688	5.0918	5.5676	-36.7174		33.593	1.5402	4.3136	-6.0361	0.2666	0.1588	-5.5542	-0.5552	5.1188	-21.6556		33.594	4.1058	0.8838	-0.1351	1.3053	0.085	0.0089	0.46	0.8877	-11.5842		33.578	0.1336	2.6965	-0.5315	-0.0337	0.3769
33.64	-1.7287	4.431	-0.0311	-0.6363	0.1554	-0.0275	-0.6186	5.9522	-30.5475		33.656	0.1987	11.2255	-0.3495	0.0179	7.2445	-0.0518	5.2821	6.0163	-36.2637		33.656	1.5141	4.3006	-5.9971	0.2547	0.1915	-5.4254	-1.6338	4.4136	-21.6556		33.656	4.0146	0.8707	-0.1351	1.2338	0.109	0.0065	0.3331	1.0159	-10.5861		33.641	0.1206	2.6313	-0.5315	-0.0269	0.2979
33.703	-1.8069	4.444	-0.0376	-0.6942	0.1348	-0.0348	-0.5552	5.8881	-30.6383		33.719	0.1857	11.2907	-0.3366	0.0418	7.4472	-0.0688	5.1552	5.8881	-35.2657		33.718	1.5271	4.3006	-5.9646	0.253	0.1897	-5.3233	-1.0628	4.3495	-21.5649		33.719	3.9495	0.8838	-0.1416	1.2031	0.1228	0.0089	0.3965	0.3107	-10.2232		33.703	0.1336	2.54	-0.5315	-0.0065	0.2533
33.765	-1.885	4.444	-0.0441	-0.7231	0.1193	-0.0324	-0.238	6.0804	-31.0012		33.781	0.1857	11.369	-0.356	0.0486	7.6361	-0.0664	6.107	5.1829	-36.173		33.781	1.5141	4.3136	-5.9386	0.2377	0.188	-5.1896	-1.0628	4.3495	-22.4722		33.781	3.8583	0.9099	-0.1416	1.1469	0.0867	-0.0008	-0.1111	0.1825	-10.2232		33.766	0.1206	2.4748	-0.5445	-0.0456	0.255
33.828	-1.9762	4.431	-0.0441	-0.8015	0.1056	-0.0324	-0.1111	5.9522	-31.5456		33.844	0.1987	11.4472	-0.3495	0.0401	7.7546	-0.081	5.0918	5.6958	-37.0803		33.843	1.5141	4.3006	-5.8931	0.224	0.1949	-5.0948	-0.7455	5.3111	-21.9278		33.844	3.7932	0.9229	-0.1481	1.0787	0.0901	0.0187	0.1427	0.1825	-10.6769		33.828	0.1336	2.3966	-0.5445	-0.0065	0.2292
33.89	-2.0543	4.4571	-0.0311	-0.8714	0.0798	-0.0421	-0.6821	7.2985	-31.7271		33.906	0.1857	11.4863	-0.3495	0.0435	7.5794	-0.0616	3.4421	5.9522	-35.8101		33.906	1.5011	4.3136	-5.8736	0.1985	0.2035	-4.9369	-0.809	4.606	-22.9259		33.906	3.7151	0.9099	-0.1481	0.9612	0.0815	-0.0081	-0.238	0.0543	-10.0417		33.891	0.1336	2.3053	-0.5445	-0.0371	0.2258
33.953	-2.1325	4.431	-0.0246	-0.8969	0.0575	-0.03	-0.1111	6.8497	-32.5437		33.969	0.1727	11.4863	-0.3495	0.052	6.9972	-0.0591	0.7772	5.0547	-33.9954		33.968	1.5011	4.3136	-5.8411	0.2087	0.2035	-4.8421	-0.5552	4.8624	-22.3815		33.969	3.6369	0.9229	-0.1481	0.9033	0.1159	0.0381	0.6503	0.4389	-9.0437		33.953	0.1206	2.214	-0.551	-0.0456	0.2241
34.015	-2.2106	4.444	-0.0246	-0.9617	0.0506	-0.0275	0.2062	6.1446	-31.7271		34.031	0.1597	11.4472	-0.3495	0.0179	6.6641	-0.064	1.0945	5.7599	-32.09		34.031	1.462	4.3006	-5.7956	0.2002	0.2086	-4.706	-0.4283	4.8624	-22.7444		34.031	3.5588	0.9359	-0.1416	0.8573	0.1039	-0.0105	-0.1111	0.8236	-9.6788		34.016	0.1206	2.1227	-0.5575	-0.0099	0.2533
34.078	-2.2887	4.444	-0.0181	-0.9719	0.0026	-0.0397	-0.1745	6.7856	-32.7251		34.094	0.1727	11.3559	-0.3431	0.0486	6.4924	-0.0494	2.1097	5.1188	-29.0051		34.093	1.475	4.2875	-5.7826	0.2121	0.2103	-4.6185	0.0793	4.9906	-22.1093		34.094	3.4676	0.949	-0.1546	0.7976	0.0712	0.0284	0.2062	0.3748	-10.3139		34.078	0.1206	2.0575	-0.564	-0.0252	0.2
34.14	-2.3669	4.444	-0.0116	-1.0588	-0.0266	-0.0494	-0.1745	6.2087	-32.2715		34.156	0.1727	11.2907	-0.3366	0.0094	6.0922	-0.047	0.8407	5.5035	-29.368		34.156	1.462	4.3136	-5.7501	0.2036	0.2224	-4.5261	-0.6821	4.9906	-22.2908		34.156	3.3895	0.962	-0.1546	0.7414	0.1142	0.0332	0.3965	0.4389	-10.0417		34.141	0.1336	1.9792	-0.577	-0.0473	0.1846
34.203	-2.432	4.444	-0.0116	-1.1184	0.0094	-0.0275	0.3331	6.2728	-32.4529		34.219	0.1857	11.2125	-0.3431	0.0264	5.9239	-0.047	2.4904	5.247	-27.0089		34.218	1.449	4.3267	-5.7241	0.2019	0.2275	-4.3852	-0.9359	5.1188	-22.2		34.219	3.3114	0.962	-0.1546	0.7193	0.1125	0.0235	0.2062	0.3748	-9.1344		34.203	0.1336	1.888	-0.564	-0.0354	0.121
34.265	-2.4971	4.431	0.0014	-1.224	-0.0352	-0.0421	-0.0476	7.0421	-32.3622		34.281	0.1857	11.1342	-0.3301	0.0418	5.4585	-0.0616	0.7772	5.824	-26.5552		34.281	1.462	4.3136	-5.6916	0.2104	0.2498	-4.2928	-0.4283	4.606	-22.8352		34.281	3.2332	0.949	-0.1546	0.6392	0.1004	0.0259	0.2062	0.503	-10.5861		34.266	0.1206	1.8097	-0.577	-0.0218	0.0901
34.328	-2.5622	4.4571	0.0014	-1.2785	-0.0146	-0.0275	0.5234	7.619	-32.4529		34.344	0.1857	11.056	-0.3106	0.0043	5.194	-0.0591	-0.238	5.1829	-26.8274		34.343	1.462	4.3136	-5.6657	0.1729	0.2292	-4.2029	-0.5552	4.9906	-22.8352		34.344	3.1681	0.949	-0.1741	0.5966	0.0953	0.0187	0.2696	0.8236	-9.951		34.328	0.1336	1.7445	-0.59	-0.0388	0.097
34.39	-2.6664	4.4571	0.0144	-1.3313	-0.0335	-0.0251	0.5234	6.7215	-33.0881		34.406	0.1857	10.9777	-0.3041	0.0315	4.8987	-0.0543	-0.3014	5.5035	-25.8294		34.406	1.4229	4.3006	-5.6202	0.1985	0.2516	-4.0814	-0.809	4.8624	-23.1074		34.406	3.0769	0.962	-0.1806	0.5983	0.1417	0.0162	0.1427	0.0543	-9.3159		34.391	0.1206	1.6532	-0.59	-0.0201	0.0403
34.453	-2.7446	4.4571	0.0144	-1.3467	-0.0455	-0.0397	-0.0476	6.0163	-31.9085		34.469	0.1857	10.9255	-0.2976	0.0418	4.5655	-0.0518	-0.3648	5.3111	-24.922		34.468	1.4229	4.3136	-5.5877	0.1712	0.2481	-3.9647	-0.4283	4.9906	-23.6518		34.469	2.9988	0.962	-0.1936	0.52	0.1176	0.0138	0.2062	0.503	-10.0417		34.453	0.1206	1.588	-0.5965	-0.0235	0.0335
34.515	-2.8227	4.4701	0.0209	-1.4489	-0.0524	-0.0348	0.5869	6.6574	-31.9993		34.531	0.1727	10.8473	-0.3041	-0.057	4.4522	-0.0494	0.5234	5.9522	-25.3757		34.531	1.4099	4.3136	-5.5422	0.19	0.2567	-3.8869	-0.6821	4.7342	-22.6537		34.531	2.9076	0.949	-0.2066	0.5234	0.1279	0.0162	0.1427	-0.0739	-9.3159		34.516	0.1206	1.5228	-0.5965	-0.0269	0.0266
34.578	-2.9008	4.4832	0.0209	-1.5153	-0.0335	-0.03	0.7138	7.0421	-33.451		34.594	0.1727	10.7951	-0.2846	-0.0025	4.2255	-0.047	0.1427	5.6958	-25.1942		34.593	1.3969	4.3136	-5.4967	0.1661	0.2602	-3.7557	-0.5552	5.1188	-22.7444		34.594	2.8295	0.962	-0.2131	0.462	0.1176	0.0284	-0.1745	0.8877	-9.7695		34.578	0.1206	1.4446	-0.6095	-0.0133	0.0094
34.64	-2.9529	4.4962	0.0274	-1.5937	-0.0713	-0.0397	0.7772	7.3626	-33.0881		34.656	0.1727	10.6908	-0.2911	-0.0076	4.028	-0.0567	-0.3648	5.0547	-25.7386		34.656	1.3969	4.3136	-5.4642	0.1576	0.2619	-3.6804	-0.0476	4.9906	-24.1054		34.656	2.7644	0.962	-0.2196	0.3751	0.0644	0.0235	0.5869	1.1441	-9.951		34.641	0.1206	1.3402	-0.603	0.0038	0.0335
34.703	-3.0571	4.5353	0.0469	-1.6584	-0.0369	-0.0324	1.1579	7.3626	-32.9973		34.719	0.1987	10.6256	-0.2911	-0.0008	3.8769	-0.0348	0.5234	5.5676	-25.5572		34.718	1.3709	4.3136	-5.4187	0.132	0.2705	-3.5807	-0.238	4.6701	-23.2888		34.719	2.6862	0.949	-0.2261	0.3547	0.1331	0.0211	0.0158	0.6954	-9.7695		34.703	0.1206	1.2489	-0.6225	-0.0252	-0.0232
34.765	-3.1353	4.5614	0.0599	-1.7232	-0.061	-0.0421	0.2696	7.3626	-32.3622		34.781	0.1857	10.5343	-0.2846	0.0128	3.5643	-0.0567	-0.9359	4.9906	-25.6479		34.781	1.3578	4.3136	-5.3797	0.1338	0.2687	-3.5029	-0.809	4.606	-23.1074		34.781	2.6081	0.949	-0.2261	0.3309	0.0919	0.0187	0.5869	0.8877	-10.2232		34.766	0.1206	1.1837	-0.6225	-0.0371	-0.0833
34.828	-3.2134	4.6005	0.0729	-1.7436	-0.0644	-0.0324	1.1579	6.2087	-32.5437		34.844	0.1857	10.443	-0.2781	-0.0076	3.4544	-0.0445	-0.5552	5.3753	-25.1942		34.843	1.3318	4.3267	-5.3407	0.1252	0.267	-3.3912	-0.0476	4.9906	-23.1981		34.844	2.5299	0.9751	-0.2326	0.2934	0.1228	0.0089	0.7772	0.6954	-10.0417		34.828	0.1206	1.1055	-0.629	0.0157	-0.0713
34.89	-3.2916	4.6527	0.0859	-1.8168	-0.0421	-0.0275	1.0945	6.1446	-34.2676		34.906	0.1857	10.3909	-0.2846	-0.0145	3.2655	-0.03	-0.9993	5.0547	-25.285		34.906	1.2927	4.3136	-5.3082	0.1133	0.2756	-3.3207	-0.8724	5.0547	-23.4703		34.906	2.4518	0.962	-0.2326	0.2678	0.1142	0.0211	-0.5552	0.6313	-10.0417		34.891	0.1466	1.0142	-0.6355	-0.0167	-0.0868
34.953	-3.3567	4.6788	0.0924	-1.8867	-0.0679	-0.0421	0.5234	6.5933	-33.8139		34.969	0.1857	10.2996	-0.2781	-0.0076	3.1487	-0.03	-0.3648	5.1829	-24.8313		34.968	1.3057	4.3136	-5.2757	0.1184	0.2739	-3.2332	-0.6821	5.1188	-23.3796		34.969	2.3737	0.962	-0.2586	0.2729	0.0987	0.0308	0.5234	0.4389	-10.0417		34.953	0.1336	0.949	-0.642	-0.0082	-0.0713
35.015	-3.4348	4.7309	0.1184	-1.9923	-0.0507	-0.0275	0.8407	7.2985	-33.7232		35.031	0.1857	10.2083	-0.2781	-0.0451	3.0182	-0.0348	0.1427	5.4394	-25.1035		35.031	1.3188	4.3136	-5.2367	0.1116	0.2739	-3.1676	-0.3014	5.1188	-23.2888		35.031	2.3085	0.962	-0.2781	0.2729	0.1022	0.0089	0.9676	0.6313	-10.3139		35.016	0.1206	0.8447	-0.6485	-0.0507	-0.1692
35.078	-3.526	4.8092	0.1444	-2.0468	-0.0438	-0.0202	1.4752	7.8114	-33.7232		35.094	0.1857	10.1561	-0.2716	-0.0349	2.8465	-0.0324	-0.1745	4.9906	-25.0128		35.093	1.2927	4.3136	-5.1977	0.132	0.2979	-3.0606	-0.5552	5.1188	-23.6518		35.094	2.2304	0.9751	-0.2911	0.2389	0.1331	0.0284	-0.4917	0.1825	-9.3159		35.078	0.1336	0.7794	-0.6485	-0.0269	-0.2379
35.14	-3.6041	4.8614	0.1639	-2.1627	-0.0541	-0.0421	0.5234	7.619	-33.9954		35.156	0.1857	10.0648	-0.2781	-0.0076	2.7228	-0.0445	-0.809	4.8624	-24.0147		35.156	1.3057	4.3136	-5.1587	0.1218	0.2945	-2.9926	-0.1111	5.0547	-23.924		35.156	2.1392	0.9881	-0.3041	0.1792	0.0936	0.0211	0.7138	0.6313	-10.3139		35.141	0.1206	0.6882	-0.655	-0.0269	-0.2413
35.203	-3.6692	4.9135	0.1899	-2.241	-0.0438	-0.0372	1.3483	7.8114	-33.9047		35.219	0.1857	10.0127	-0.2716	-0.0451	2.5648	-0.0421	-1.0628	4.8624	-24.8313		35.218	1.2927	4.3267	-5.1262	0.1303	0.2996	-2.8905	-0.0476	5.1188	-23.561		35.219	2.0611	0.9881	-0.2976	0.1264	0.109	0.0041	0.3331	1.2723	-10.1325		35.203	0.1206	0.649	-0.6615	-0.0218	-0.1984
35.265	-3.7474	4.9527	0.2029	-2.3075	-0.0421	-0.0494	0.5869	7.6831	-33.9047		35.281	0.1727	9.9344	-0.2651	-0.0247	2.4309	-0.0348	-0.5552	5.3753	-24.6498		35.281	1.2536	4.3006	-5.0743	0.1389	0.2911	-2.8346	-0.3648	4.9265	-23.7425		35.281	1.996	0.9881	-0.3041	0.1196	0.0953	0.0308	-0.1111	1.08	-10.4954		35.266	0.1466	0.5317	-0.6745	-0.003	-0.2138
35.328	-3.8125	4.9918	0.2159	-2.4029	-0.0524	-0.0227	0.8407	6.9138	-34.9935		35.344	0.1857	9.8562	-0.2716	-0.0417	2.2832	-0.0494	-1.1262	5.4394	-23.6518		35.343	1.2667	4.3136	-5.0483	0.1184	0.3048	-2.7277	-0.4283	4.9906	-23.8332		35.344	1.8918	0.9751	-0.3171	0.0668	0.121	0.0527	0.7772	1.2082	-10.3139		35.328	0.1206	0.4665	-0.681	0.0089	-0.2362
35.39	-3.9037	5.0309	0.2289	-2.4761	-0.0438	-0.0372	0.7138	7.5549	-33.9047		35.406	0.1857	9.7518	-0.2586	-0.0196	2.1544	-0.0372	-0.9993	5.3111	-24.7406		35.406	1.2536	4.3136	-5.0028	0.1252	0.3014	-2.6839	-0.4917	5.0547	-24.4684		35.406	1.8267	0.9881	-0.3301	0.0941	0.1417	0.0332	0.2062	1.0159	-10.2232		35.391	0.1076	0.4143	-0.6875	0.0004	-0.31
35.453	-3.9558	5.057	0.2484	-2.5869	-0.0661	-0.047	1.8559	7.9396	-34.0861		35.469	0.1727	9.6736	-0.2651	-0.057	2.0548	-0.0397	-1.2531	5.4394	-24.1054		35.468	1.2536	4.3006	-4.9703	0.1065	0.334	-2.5916	-0.4283	5.1188	-23.6518		35.469	1.7355	0.962	-0.3431	0.0753	0.1262	0.0114	-0.0476	0.2466	-10.4047		35.453	0.1336	0.31	-0.681	-0.0133	-0.3684
35.515	-4.0339	5.057	0.2678	-2.7368	-0.0558	-0.0494	1.3483	7.9396	-34.0861		35.531	0.1857	9.5693	-0.2716	-0.0468	2.0135	-0.0372	-1.1262	5.824	-24.0147		35.531	1.2276	4.3136	-4.9313	0.0912	0.3048	-2.5357	-0.3648	4.9265	-24.4684		35.531	1.6704	0.9751	-0.3625	0.0634	0.1245	0.0259	0.3965	0.3107	-10.2232		35.516	0.1206	0.2317	-0.694	-0.003	-0.4027
35.578	-4.099	5.07	0.2808	-2.8339	-0.0576	-0.0251	1.4117	7.8755	-34.2676		35.594	0.1727	9.5171	-0.2586	-0.0605	1.8968	-0.0348	-1.5069	5.1829	-23.7425		35.593	1.2146	4.3006	-4.8988	0.0809	0.3117	-2.4433	0.2696	5.4394	-24.5591		35.594	1.5792	0.9751	-0.382	0.0566	0.1142	0.0016	-0.0476	0.3748	-9.8603		35.578	0.1206	0.1404	-0.694	-0.0013	-0.4113
35.64	-4.1771	5.1222	0.2938	-2.9361	-0.0438	-0.0251	1.0945	7.4267	-34.9935		35.656	0.1857	9.4388	-0.2651	-0.04	1.7285	-0.0445	-1.7607	5.0547	-23.7425		35.656	1.1885	4.3136	-4.8533	0.098	0.3185	-2.3753	-0.7455	5.1829	-24.7406		35.656	1.4881	0.9751	-0.408	0.0344	0.0987	0.0235	-0.3014	0.3748	-11.0398		35.641	0.1206	0.0491	-0.7005	-0.0201	-0.389
35.703	-4.2553	5.1613	0.3068	-3.0417	-0.0369	-0.0324	0.9041	7.619	-33.8139		35.719	0.1727	9.3736	-0.2651	-0.0417	1.6546	-0.0421	-1.38	5.3111	-23.7425		35.718	1.1755	4.2875	-4.8208	0.0758	0.31	-2.2878	-0.238	4.9265	-25.285		35.719	1.4099	0.9881	-0.421	0.0327	0.1073	0.0235	0.5869	0.503	-11.1305		35.703	0.1206	-0.003	-0.707	-0.0013	-0.4525
35.765	-4.3465	5.2135	0.3393	-3.1167	-0.0163	-0.0397	1.031	7.3626	-34.6305		35.781	0.1727	9.3084	-0.2521	-0.0485	1.5344	-0.0518	-1.9511	5.247	-23.6518		35.781	1.1625	4.3136	-4.7818	0.0622	0.3065	-2.261	-0.7455	5.0547	-25.1035		35.781	1.3448	0.9751	-0.434	0.0089	0.121	0.0187	0.7772	0.5672	-12.0379		35.766	0.1206	-0.0813	-0.7135	-0.0099	-0.4749
35.828	-4.4116	5.2396	0.3458	-3.2785	-0.0558	-0.0275	1.0945	7.5549	-35.3564		35.844	0.1727	9.2171	-0.2586	-0.0366	1.488	-0.0421	-1.3166	4.9906	-23.4703		35.843	1.1234	4.3006	-4.7428	0.0571	0.2842	-2.2003	-0.9359	5.1188	-25.0128		35.844	1.2667	0.9751	-0.447	-0.0235	0.109	0.0211	-0.3014	0.6313	-11.7657		35.828	0.1206	-0.1726	-0.733	-0.0201	-0.5607
35.89	-4.4767	5.2787	0.3653	-3.3807	-0.0352	-0.0445	1.4117	8.9012	-34.7213		35.906	0.1727	9.1259	-0.2521	-0.0451	1.4314	-0.0445	-1.1262	4.9265	-23.6518		35.906	1.1234	4.3267	-4.7103	0.0588	0.2859	-2.1274	-0.6186	5.4394	-24.8313		35.906	1.1755	0.9751	-0.4535	-0.0439	0.1056	0.043	0.6503	1.3365	-10.4047		35.891	0.1206	-0.2508	-0.7265	-0.0167	-0.5882
35.953	-4.5418	5.3048	0.3718	-3.5017	-0.0129	-0.0348	0.7138	7.8114	-34.9027		35.969	0.1857	9.0476	-0.2521	-0.0366	1.3781	-0.0227	-1.1897	4.9906	-23.7425		35.968	1.1234	4.3136	-4.6648	0.0486	0.3134	-2.0326	-0.5552	5.1188	-25.1035		35.969	1.0974	0.9751	-0.4665	-0.0576	0.1125	0.043	-0.4917	0.6954	-10.0417		35.953	0.1206	-0.316	-0.733	-0.0286	-0.5487
36.015	-4.6069	5.3178	0.3913	-3.6618	-0.0163	-0.0324	0.7138	8.5807	-35.4471		36.031	0.1727	8.9433	-0.2456	-0.04	1.2888	-0.03	-1.2531	5.5676	-23.924		36.031	1.0974	4.3006	-4.6258	0.0826	0.2962	-1.9742	-0.809	5.6317	-25.1942		36.031	1.0322	0.962	-0.486	-0.0473	0.1296	0.0454	0.0793	0.7595	-11.7657		36.016	0.1206	-0.4203	-0.7395	-0.0303	-0.5916
36.078	-4.6851	5.3439	0.4043	-3.776	-0.0112	-0.0348	0.5869	8.3242	-34.2676		36.094	0.1857	8.8781	-0.2456	-0.0417	1.1978	-0.0445	-1.0628	4.606	-23.3796		36.093	1.1104	4.3136	-4.5998	0.0741	0.3048	-1.9038	-0.4917	4.7983	-25.1942		36.094	0.9411	0.962	-0.499	-0.0507	0.0987	0.0284	0.3331	1.0159	-11.312		36.078	0.1206	-0.4725	-0.7395	0.0004	-0.6706
36.14	-4.7632	5.37	0.4173	-3.8697	-0.0232	-0.047	0.3331	7.6831	-35.3564		36.156	0.1857	8.7998	-0.2326	-0.0383	1.1085	-0.0324	-1.38	5.0547	-23.7425		36.156	1.0974	4.3006	-4.5543	0.0656	0.3203	-1.86	-0.7455	4.9265	-25.3757		36.156	0.8369	0.9751	-0.512	-0.0814	0.1056	0.0187	-0.4917	0.6954	-12.5823		36.141	0.1206	-0.5768	-0.746	0.0157	-0.693
36.203	-4.8283	5.383	0.4238	-3.9685	0.0077	-0.03	0.2696	8.6448	-35.3564		36.219	0.1857	8.7216	-0.2326	-0.0468	1.0759	-0.0372	-1.5704	4.8624	-23.2888		36.218	1.0843	4.3006	-4.5023	0.0826	0.3065	-1.7823	-0.3014	5.247	-25.1035		36.219	0.7457	0.962	-0.525	-0.1019	0.0781	0.0016	-0.1745	0.6313	-11.4935		36.203	0.1206	-0.6421	-0.759	-0.0065	-0.7359
36.265	-4.8934	5.4091	0.4368	-4.1269	-0.0043	-0.0178	1.0945	8.7089	-35.7193		36.281	0.1727	8.6433	-0.2391	-0.0417	1.0123	-0.0275	-1.5069	5.0547	-23.1981		36.281	1.1104	4.3006	-4.4699	0.0588	0.3134	-1.7069	-0.4917	5.9522	-25.1942		36.281	0.6806	0.9751	-0.5315	-0.1053	0.0884	0.0259	0.1427	0.9518	-11.4935		36.266	0.1206	-0.7464	-0.759	0.0191	-0.7548
36.328	-4.9716	5.3961	0.4563	-4.2887	-0.0198	-0.0397	0.8407	9.2217	-34.2676		36.344	0.1857	8.552	-0.2261	-0.057	1.0072	-0.0275	-0.6821	4.9906	-22.7444		36.343	1.0843	4.3136	-4.4309	0.0673	0.3117	-1.6389	-0.1111	5.3111	-25.3757		36.344	0.6025	0.9751	-0.551	-0.1172	0.121	0.0138	-0.1111	1.2082	-12.2193		36.328	0.1336	-0.8377	-0.759	-0.0048	-0.8166
36.39	-5.0367	5.4221	0.4628	-4.4574	-0.0043	-0.0324	1.3483	8.9653	-34.7213		36.406	0.1857	8.4738	-0.2261	-0.0707	0.9419	-0.0324	-0.9993	5.6958	-23.924		36.406	1.0843	4.3136	-4.3854	0.0792	0.3203	-1.5903	-0.9993	5.0547	-26.0108		36.406	0.5243	0.9751	-0.5705	-0.078	0.1125	0.0284	-0.0476	0.1184	-11.7657		36.391	0.1206	-0.9029	-0.7785	-0.0201	-0.8389
36.453	-5.1018	5.4613	0.4693	-4.5749	0.0026	-0.0421	0.9041	8.773	-34.9935		36.469	0.1857	8.4086	-0.2326	-0.0553	0.9059	-0.047	-1.6973	4.9906	-21.9278		36.468	1.0713	4.3136	-4.3399	0.0571	0.3048	-1.5101	-0.8724	5.6958	-25.8294		36.469	0.4462	0.962	-0.59	-0.0967	0.1245	0.0211	0.2062	0.2466	-11.7657		36.453	0.1336	-0.9942	-0.7785	0.0106	-0.8939
36.515	-5.1669	5.4743	0.4758	-4.7351	-0.0095	-0.0372	1.2848	8.3883	-35.3564		36.531	0.1857	8.2912	-0.2196	-0.0485	0.8269	-0.0543	-2.078	5.6317	-22.2		36.531	1.0583	4.3136	-4.3139	0.0622	0.3134	-1.4614	-0.4917	5.3111	-24.8313		36.531	0.355	0.9751	-0.603	-0.1342	0.0901	-0.0008	0.0158	0.8236	-12.673		36.516	0.1336	-1.0463	-0.785	0.0242	-0.9248
36.578	-5.2451	5.4873	0.4823	-4.8339	0.0352	-0.0348	0.7772	8.5166	-34.2676		36.594	0.1857	8.239	-0.2196	-0.0519	0.796	-0.0251	-1.8876	4.5419	-23.2888		36.593	1.0453	4.3136	-4.2554	0.0571	0.3151	-1.425	-0.809	5.247	-25.285		36.594	0.2639	0.9751	-0.616	-0.1547	0.1245	0.0381	0.3331	-0.0098	-11.5842		36.578	0.1206	-1.1376	-0.785	-0.003	-0.9351
36.64	-5.3232	5.5134	0.5018	-5.0196	-0.0009	-0.0372	1.031	8.773	-36.0823		36.656	0.1727	8.1478	-0.2196	-0.0622	0.7925	-0.0324	-1.3166	4.4777	-21.8371		36.656	1.0453	4.3136	-4.2164	0.0486	0.3168	-1.3545	-0.9993	5.6958	-26.7367		36.656	0.1987	0.962	-0.6225	-0.1683	0.1176	0.0381	0.1427	1.5929	-13.3081		36.641	0.1336	-1.2159	-0.7915	0.0208	-0.9832
36.703	-5.3883	5.5134	0.5083	-5.1882	-0.0198	-0.0372	1.2848	9.0294	-35.0842		36.719	0.1857	8.0826	-0.2131	-0.057	0.729	-0.0372	-2.3318	4.9906	-22.6537		36.718	1.0192	4.3006	-4.1774	0.0605	0.3151	-1.2865	-0.3648	6.0804	-26.5552		36.719	0.1076	0.9751	-0.6355	-0.1427	0.1228	0.0381	-0.0476	0.503	-13.0359		36.703	0.1076	-1.3072	-0.7915	0.0157	-1.0158
36.765	-5.4535	5.5265	0.5213	-5.316	0.0232	-0.0275	0.6503	8.5166	-34.9027		36.781	0.1857	7.9913	-0.2066	-0.0639	0.6431	-0.0494	-2.9028	5.0547	-22.2		36.781	1.0192	4.3136	-4.1319	0.0332	0.2979	-1.2816	-0.9993	5.5676	-26.3738		36.781	0.0294	0.962	-0.6615	-0.1359	0.1228	0.0259	0.5234	0.9518	-14.034		36.766	0.1206	-1.3854	-0.8045	-0.0065	-1.1
36.828	-5.5186	5.5525	0.5278	-5.471	-0.0181	-0.0348	0.7138	9.4782	-36.173		36.844	0.1857	7.9261	-0.2066	-0.0622	0.6414	-0.0324	-2.5856	5.247	-22.3815		36.843	0.9932	4.2875	-4.1059	0.0401	0.3082	-1.2135	-0.7455	5.824	-26.5552		36.844	-0.0487	0.9751	-0.668	-0.1479	0.1142	0.0235	-0.238	0.0543	-13.8525		36.828	0.1206	-1.4506	-0.8045	0.0072	-1.1824
36.89	-5.5967	5.5525	0.5473	-5.6124	0.0541	-0.0372	1.6021	9.0935	-35.8101		36.906	0.1857	7.8348	-0.2066	-0.0724	0.638	-0.0348	-1.6973	5.3753	-22.6537		36.906	0.9932	4.2745	-4.0669	0.0537	0.2979	-1.1576	-0.4283	6.401	-26.646		36.906	-0.1268	0.9751	-0.6875	-0.1547	0.1142	0.0162	0.0793	0.3748	-14.1247		36.891	0.1076	-1.5419	-0.811	0.0242	-1.1549
36.953	-5.6618	5.5656	0.5473	-5.7606	0.0489	-0.0445	1.6021	9.2217	-36.2637		36.969	0.1987	7.7565	-0.1936	-0.0451	0.686	-0.0445	-1.8242	5.247	-22.3815		36.968	1.0062	4.2745	-4.0344	0.0435	0.2979	-1.109	-0.7455	6.0804	-26.5552		36.969	-0.205	0.962	-0.7005	-0.1717	0.0901	0.0114	-0.1745	0.2466	-14.6691		36.953	0.1206	-1.6071	-0.824	0.0515	-1.1824
37.015	-5.74	5.5917	0.5473	-5.9344	0.0317	-0.0324	0.7138	9.4782	-36.8989		37.031	0.1597	7.6652	-0.2001	-0.057	0.6569	-0.0397	-1.6338	5.3111	-21.9278		37.031	0.9671	4.2745	-3.9824	0.052	0.2859	-1.0556	-0.8724	5.6958	-26.9182		37.031	-0.2831	0.9751	-0.707	-0.233	0.0901	0.0114	0.2062	1.0159	-13.9433		37.016	0.1336	-1.6854	-0.8305	0.0293	-1.1841
37.078	-5.8051	5.5917	0.5603	-6.1456	0.0146	-0.0397	0.9676	9.0935	-35.4471		37.094	0.1597	7.587	-0.1936	-0.0434	0.6191	-0.0251	-1.38	5.1829	-22.4722		37.093	0.9541	4.2875	-3.9434	0.0605	0.3082	-1.0167	-0.6186	5.1829	-27.2811		37.094	-0.3743	0.9881	-0.707	-0.2722	0.0919	0.0065	0.46	1.5288	-14.4877		37.078	0.1206	-1.7897	-0.8435	0.0395	-1.2322
37.14	-5.8702	5.6308	0.5798	-6.3058	0.0867	-0.0348	0.9041	9.5423	-35.6286		37.156	0.1987	7.5087	-0.2001	-0.0468	0.571	-0.0348	-1.6973	5.5035	-22.9259		37.156	0.9281	4.2745	-3.9044	0.0179	0.31	-0.9997	-1.0628	4.9906	-26.7367		37.156	-0.4524	0.9751	-0.72	-0.2262	0.0901	0.0138	0.46	0.6313	-15.3043		37.141	0.1206	-1.8679	-0.85	0.0378	-1.3404
37.203	-5.9614	5.6308	0.5863	-6.4813	0.0438	-0.0445	1.4752	9.35	-36.6267		37.219	0.1857	7.4305	-0.2001	-0.0451	0.5418	-0.0372	-2.649	5.1829	-21.5649		37.218	0.915	4.2615	-3.8655	0.0418	0.2962	-0.9413	-1.1262	5.5676	-27.3718		37.219	-0.5306	0.9881	-0.733	-0.2518	0.085	0.0332	0.0793	-0.0098	-14.7599		37.203	0.1206	-1.9462	-0.8435	0.0344	-1.4606
37.265	-6.0265	5.696	0.5928	-6.6891	0.0678	-0.0421	0.7772	9.5423	-35.7193		37.281	0.1987	7.3522	-0.1806	-0.0792	0.5178	-0.0251	-2.3952	4.9265	-21.7464		37.281	0.902	4.2484	-3.8265	0.0247	0.2928	-0.9	-0.9359	5.5035	-26.9182		37.281	-0.6087	0.9881	-0.772	-0.2364	0.1004	0.0308	0.2062	0.1184	-15.0321		37.266	0.0946	-2.0114	-0.85	0.0106	-1.4331
37.328	-6.0916	5.696	0.6123	-6.7998	0.0214	-0.0202	0.9676	9.4782	-36.9896		37.344	0.1857	7.2349	-0.1741	-0.0451	0.5349	-0.0421	-2.078	5.1188	-21.5649		37.343	0.889	4.2615	-3.7875	0.0179	0.2928	-0.8952	-1.2531	5.5676	-27.3718		37.344	-0.6999	0.9751	-0.785	-0.2415	0.1228	0.0041	-0.0476	0.503	-15.8487		37.328	0.0946	-2.0896	-0.863	0.06	-1.4795
37.39	-6.1697	5.709	0.6123	-7.006	0.0953	-0.0348	1.1579	9.2858	-36.5359		37.406	0.1857	7.1566	-0.1871	-0.0485	0.5658	-0.0348	-0.6186	5.4394	-22.563		37.406	0.876	4.2615	-3.755	0.0349	0.2756	-0.8344	-0.7455	5.3111	-27.3718		37.406	-0.765	0.9881	-0.7785	-0.2739	0.0764	0.0187	0.3965	0.5672	-16.4838		37.391	0.0685	-2.1809	-0.8825	0.0293	-1.4486
37.453	-6.2349	5.7221	0.6383	-7.1712	0.1176	-0.0275	0.3965	9.5423	-36.4452		37.469	0.1857	7.0784	-0.1806	-0.0468	0.5641	-0.0445	-1.38	5.0547	-22.4722		37.468	0.8629	4.2484	-3.7225	0.0281	0.2962	-0.8247	-1.3166	5.6317	-27.4626		37.469	-0.8431	1.0011	-0.7915	-0.3012	0.0798	0.0089	0.9676	1.0159	-17.0282		37.453	0.0685	-2.2461	-0.8955	0.0157	-1.4932
37.515	-6.313	5.7351	0.6318	-7.4421	0.0712	-0.0154	0.46	10.2475	-36.9896		37.531	0.1987	6.974	-0.1806	-0.0622	0.4971	-0.0372	-0.9993	5.3111	-22.6537		37.531	0.8499	4.2484	-3.6835	0.0247	0.3065	-0.7882	-0.9359	5.247	-27.7348		37.531	-0.9343	1.0142	-0.798	-0.3029	0.0815	0.0259	-0.1745	0.7595	-17.119		37.516	0.0425	-2.3244	-0.9085	0.0225	-1.5551
37.578	-6.3911	5.7351	0.6513	-7.6601	0.085	-0.03	1.2214	9.7346	-36.8081		37.594	0.1987	6.9219	-0.1741	-0.0536	0.3683	-0.0494	-2.7125	4.8624	-21.9278		37.593	0.8629	4.2484	-3.6315	0.0179	0.31	-0.7542	-1.5704	5.3753	-28.3699		37.594	-1.0255	1.0011	-0.8305	-0.3591	0.0833	0.0235	0.46	1.0159	-17.0282		37.578	0.0164	-2.4026	-0.9085	0.0378	-1.6804
37.64	-6.4432	5.7482	0.6578	-7.8032	0.0781	-0.0178	1.0945	10.1193	-36.7174		37.656	0.1727	6.8436	-0.1546	-0.0366	0.3374	-0.0348	-3.1566	4.7983	-22.3815		37.656	0.8499	4.2484	-3.599	0.0264	0.3151	-0.7153	-0.4283	5.3753	-27.9162		37.656	-1.1036	0.9881	-0.837	-0.3506	0.0884	0.0187	1.031	1.5929	-17.0282		37.641	0.0164	-2.4809	-0.915	-0.0013	-1.7371
37.703	-6.4823	5.7482	0.6578	-7.5	0.1125	-0.0275	1.1579	7.1062	-36.8081		37.719	0.1727	6.7654	-0.1286	-0.0519	0.3666	-0.0372	-3.2835	4.7983	-21.0205		37.718	0.8499	4.2354	-3.5535	0.023	0.3117	-0.6837	-1.1262	5.5676	-27.7348		37.719	-1.1687	1.0011	-0.8305	-0.4068	0.0867	0.0138	-0.3014	1.5288	-17.4819		37.703	0.0034	-2.5722	-0.9215	-0.0048	-1.7405
37.765	-6.4953	5.7482	0.6643	-6.9617	0.1674	-0.03	1.031	6.5933	-35.1749		37.781	0.1727	6.6611	-0.1286	-0.0519	0.4078	-0.0275	-2.1414	4.5419	-21.7464		37.781	0.8499	4.2484	-3.521	0.0281	0.3134	-0.6278	-0.6821	5.7599	-28.5514		37.781	-1.2338	1.0142	-0.8305	-0.4323	0.0678	0.0114	0.8407	1.657	-18.3892		37.766	0.0034	-2.6374	-0.928	0.0378	-1.7594
37.828	-6.4563	5.7351	0.6578	-6.8867	0.1022	-0.0202	0.9676	8.7089	-32.4529		37.844	0.1857	6.5959	-0.1286	-0.0656	0.4388	-0.0275	-1.2531	5.0547	-21.4742		37.843	0.8499	4.2354	-3.4885	0.0026	0.322	-0.5938	-0.4917	5.824	-28.0977		37.844	-1.312	1.0272	-0.837	-0.4698	0.0884	0.0114	0.2696	1.8493	-17.7541		37.828	0.0034	-2.7156	-0.9409	0.0327	-1.8024
37.89	-6.3781	5.7482	0.6513	-6.4114	0.1863	-0.0129	0.5234	8.9012	-32.3622		37.906	0.1727	6.4915	-0.1416	-0.0622	0.4422	-0.0494	-1.8242	4.9906	-20.839		37.906	0.8499	4.2354	-3.4365	0.0043	0.3168	-0.5865	-1.0628	5.3753	-27.9162		37.906	-1.4162	1.0403	-0.85	-0.4358	0.0781	0.0259	0.3331	1.1441	-19.478		37.891	-0.0096	-2.7808	-0.9409	0.0174	-1.9449
37.953	-6.3	5.7873	0.6643	-6.0025	0.2	-0.03	0.0158	8.2601	-30.2753		37.969	0.1987	6.4263	-0.1351	-0.0519	0.3907	-0.0397	-1.2531	5.3111	-21.9278		37.968	0.8239	4.2223	-3.404	0.0213	0.3065	-0.5476	-1.1262	5.3111	-28.0977		37.969	-1.4943	1.0533	-0.876	-0.4272	0.073	0.0016	0.7138	0.8877	-18.2078		37.953	-0.0357	-2.8721	-0.9409	0.0617	-1.993
38.015	-6.2609	5.7482	0.6513	-5.7657	0.1674	-0.0202	0.0158	7.7473	-29.8217		38.031	0.1857	6.3089	-0.1286	-0.0775	0.3718	-0.03	-3.1566	5.1829	-21.7464		38.031	0.8369	4.2484	-3.3585	-0.0059	0.2996	-0.5306	-0.8724	5.9522	-27.8255		38.031	-1.5985	1.0403	-0.8955	-0.4426	0.0712	0.0065	0.2062	0.8877	-20.7483		38.016	-0.0227	-2.9764	-0.9539	0.0498	-2.0187
38.078	-6.1828	5.7482	0.6448	-5.3756	0.1897	-0.0251	0.3331	5.8881	-29.6402		38.094	0.1857	6.2698	-0.1286	-0.0605	0.3031	-0.0275	-2.2683	5.1829	-22.1093		38.093	0.8499	4.2354	-3.313	0.0094	0.2911	-0.5112	-0.8724	5.6958	-28.4606		38.094	-1.6766	1.0664	-0.9085	-0.4698	0.0747	0.0089	0.1427	0.5672	-19.2058		38.078	-0.0096	-3.0416	-0.9604	0.0464	-1.9775
38.14	-6.1307	5.7612	0.6448	-5.1576	0.2103	-0.0445	0.3331	6.0163	-29.1865		38.156	0.1857	6.2046	-0.1156	-0.0315	0.3254	-0.0518	-2.7759	4.9265	-21.9278		38.156	0.8239	4.2354	-3.2806	0.0077	0.2996	-0.482	-1.2531	5.0547	-28.5514		38.156	-1.7548	1.0664	-0.915	-0.526	0.0833	0.0114	0.7138	1.4006	-20.4761		38.141	-0.0227	-3.1329	-0.9669	0.0327	-2.0909
38.203	-6.0525	5.7743	0.6383	-4.9617	0.2395	-0.0348	-0.3014	6.7856	-27.644		38.219	0.1727	6.1003	-0.1156	-0.0639	0.3546	-0.0372	-1.9511	5.7599	-20.9298		38.218	0.8239	4.2484	-3.2351	0.0264	0.2979	-0.4407	-0.4283	6.1446	-27.4626		38.219	-1.8199	1.0794	-0.9085	-0.6317	0.1004	0.0284	0.5234	1.7211	-20.2039		38.203	-0.0357	-3.1981	-0.9864	0.0464	-2.1252
38.265	-6.0004	5.7482	0.6318	-4.6959	0.2292	-0.0202	-0.1111	7.3626	-28.6421		38.281	0.1857	6.022	-0.1156	-0.0553	0.4284	-0.0518	-1.0628	4.7342	-21.3834		38.281	0.7978	4.2223	-3.1961	-0.0025	0.3168	-0.4212	-0.4283	5.7599	-29.9124		38.281	-1.898	1.0794	-0.902	-0.6317	0.0627	-0.0057	0.2696	2.3622	-20.7483		38.266	-0.0227	-3.2764	-0.9864	0.0702	-2.2557
38.328	-5.9353	5.7482	0.6253	-4.3893	0.2327	-0.0202	-0.3014	5.6317	-27.2811		38.344	0.1857	5.9438	-0.1156	-0.0451	0.3666	-0.0397	-1.6973	5.3753	-20.6576		38.343	0.8239	4.2354	-3.1571	0.0009	0.3168	-0.4067	-0.9993	5.824	-29.4587		38.344	-2.0022	1.0924	-0.9085	-0.6368	0.0815	-0.0081	0.2062	1.5288	-21.7464		38.328	-0.0227	-3.3546	-0.9929	0.0549	-2.2781
38.39	-5.8702	5.7612	0.6188	-4.1388	0.2756	-0.0251	-0.0476	5.3753	-27.5533		38.406	0.1857	5.8264	-0.1156	-0.0826	0.322	-0.0275	-1.9511	5.1188	-21.6556		38.406	0.8108	4.2223	-3.1246	-0.0196	0.3237	-0.3751	-1.3166	5.6317	-29.0051		38.406	-2.0804	1.0924	-0.9085	-0.6146	0.0627	0.0259	1.1579	0.8236	-22.4722		38.391	-0.0487	-3.4459	-0.9994	0.0447	-2.2781
38.453	-5.8181	5.7351	0.6123	-3.9446	0.231	-0.0372	-0.6821	5.1188	-26.9182		38.469	0.1857	5.7743	-0.1156	-0.0383	0.2876	-0.0421	-1.7607	5.6958	-21.3834		38.468	0.7978	4.2484	-3.0726	-0.0025	0.334	-0.3653	-0.4917	5.0547	-29.8217		38.469	-2.1585	1.1055	-0.915	-0.6385	0.0901	-0.0129	0.3331	1.2723	-22.6537		38.453	-0.0748	-3.5242	-1.0059	0.0344	-2.309
38.515	-5.74	5.7612	0.5993	-3.776	0.267	-0.0251	-0.5552	4.9906	-26.0108		38.531	0.1727	5.683	-0.1091	-0.0468	0.2996	-0.0251	-2.078	5.1188	-21.8371		38.531	0.7978	4.2484	-3.0401	0.0077	0.31	-0.3605	-0.8724	5.9522	-29.5495		38.531	-2.2497	1.1055	-0.915	-0.7254	0.0919	-0.0032	-0.1745	1.657	-22.563		38.516	-0.0487	-3.6285	-1.0319	0.0634	-2.3828
38.578	-5.6748	5.7351	0.5928	-3.5392	0.3065	-0.0227	-0.6821	5.1188	-25.7386		38.594	0.1987	5.6047	-0.1091	-0.0519	0.2808	-0.0421	-1.8876	5.1829	-20.9298		38.593	0.7978	4.2484	-3.0011	-0.023	0.3168	-0.3338	-0.6821	5.7599	-29.4587		38.594	-2.3148	1.1055	-0.9215	-0.7918	0.0764	0.0332	0.5869	1.657	-22.4722		38.578	-0.0617	-3.6937	-1.0254	0.0327	-2.455
38.64	-5.6097	5.7351	0.5863	-3.3637	0.3117	-0.0324	-0.238	5.0547	-26.7367		38.656	0.1987	5.5265	-0.1156	-0.0605	0.3306	-0.0227	-0.9993	5.3111	-20.7483		38.656	0.7978	4.2484	-2.9621	-0.0059	0.3203	-0.3216	-0.9359	5.5035	-29.6402		38.656	-2.3799	1.1055	-0.915	-0.8736	0.0764	0.0187	0.46	2.6827	-21.5649		38.641	-0.0617	-3.772	-1.0449	0.0566	-2.5649
38.703	-5.5446	5.7351	0.5733	-3.1712	0.2756	-0.0202	-0.1111	5.1829	-25.7386		38.719	0.1857	5.4482	-0.1026	-0.0315	0.3117	-0.0372	-2.4587	5.247	-21.2927		38.718	0.8108	4.2354	-2.9231	-0.0111	0.3254	-0.2997	-0.5552	5.3753	-29.8217		38.719	-2.432	1.1055	-0.915	-0.8685	0.0953	-0.0057	-0.3014	2.5545	-23.0166		38.703	-0.0748	-3.8632	-1.0449	0.0532	-2.6061
38.765	-5.4665	5.7351	0.5538	-2.9719	0.2876	-0.047	-0.7455	4.6701	-26.4645		38.781	0.1727	5.3569	-0.1026	-0.0536	0.2275	-0.0348	-3.0297	5.1829	-21.5649		38.781	0.7848	4.2484	-2.8841	-0.0145	0.322	-0.2949	-0.8724	5.6958	-29.5495		38.781	-2.5101	1.1185	-0.9215	-0.9025	0.0575	-0.0081	0.0158	1.5929	-22.3815		38.766	-0.0878	-3.9154	-1.0514	0.0702	-2.6473
38.828	-5.4144	5.7221	0.5538	-2.8526	0.2808	-0.03	-0.7455	4.2854	-25.5572		38.844	0.1727	5.2787	-0.0831	-0.0485	0.2121	-0.047	-2.9028	4.9265	-20.6576		38.843	0.7848	4.2223	-2.8516	-0.0008	0.3151	-0.2949	-1.2531	5.4394	-29.0958		38.844	-2.6013	1.1185	-0.915	-0.9451	0.0695	0.0235	1.2848	1.2082	-23.561		38.828	-0.0878	-4.0067	-1.0579	0.077	-2.6816
38.89	-5.3362	5.7351	0.5408	-2.6925	0.2911	-0.0105	-0.5552	4.8624	-26.1923		38.906	0.1857	5.2135	-0.0766	-0.0588	0.1846	-0.0372	-3.2835	5.3111	-20.7483		38.906	0.7848	4.2354	-2.8126	-0.023	0.3203	-0.2754	-0.809	5.5035	-29.2773		38.906	-2.6794	1.1316	-0.9215	-0.9622	0.0867	0.0405	0.6503	0.9518	-23.1074		38.891	-0.1008	-4.111	-1.0644	0.0804	-2.7709
38.953	-5.2841	5.7221	0.5473	-2.5596	0.2945	-0.0105	-0.4283	4.7342	-26.0108		38.969	0.1727	5.1222	-0.0766	-0.0622	0.2395	-0.0397	-2.5221	5.4394	-20.7483		38.968	0.7718	4.2223	-2.7606	-0.0145	0.3151	-0.239	-0.6186	6.0804	-29.6402		38.969	-2.7706	1.1185	-0.9215	-0.9826	0.0489	0.0016	0.9041	1.08	-23.7425		38.953	-0.0878	-4.1762	-1.0839	0.0617	-2.7727
39.015	-5.206	5.7221	0.5278	-2.3893	0.3014	-0.0227	-0.5552	4.4777	-25.1942		39.031	0.1857	5.0439	-0.0766	-0.0434	0.3031	-0.047	-1.8242	4.7342	-21.2927		39.031	0.7587	4.2484	-2.7281	-0.0162	0.3271	-0.2341	-1.2531	5.1829	-30.0939		39.031	-2.8488	1.1316	-0.9215	-1.0899	0.0747	0.0089	0.0158	1.4647	-22.2		39.016	-0.1138	-4.2675	-1.1034	0.077	-2.8568
39.078	-5.1279	5.7221	0.5148	-2.2393	0.3048	-0.0372	-0.7455	4.7983	-25.285		39.094	0.1857	4.9787	-0.0766	-0.0366	0.2996	-0.0421	-1.6973	4.7342	-20.9298		39.093	0.7718	4.2354	-2.6827	-0.0093	0.3271	-0.2317	-0.7455	5.5676	-30.9105		39.094	-2.9399	1.1055	-0.928	-1.1496	0.1004	0.0381	0.7138	2.0416	-23.0166		39.078	-0.1008	-4.3458	-1.1034	0.0753	-2.9547
39.14	-5.0627	5.696	0.5083	-2.1116	0.3168	-0.0154	-0.9359	4.0931	-25.3757		39.156	0.1727	4.8744	-0.0766	-0.0417	0.2705	-0.0372	-1.5069	5.9522	-20.4761		39.156	0.7718	4.2484	-2.6567	-0.0332	0.3271	-0.2244	-0.809	5.6317	-29.8217		39.156	-2.979	1.1185	-0.9215	-1.1887	0.0919	0.0187	1.031	1.8493	-23.6518		39.141	-0.1399	-4.424	-1.1099	0.0889	-3.0371
39.203	-4.9846	5.709	0.5083	-1.9582	0.2996	-0.03	-1.3166	4.8624	-24.4684		39.219	0.1857	4.757	-0.0766	-0.0349	0.1949	-0.0494	-3.0297	5.1829	-20.7483		39.218	0.7718	4.2354	-2.6112	-0.0111	0.3477	-0.1952	-0.3014	5.5035	-30.3661		39.219	-3.0702	1.1185	-0.9215	-1.2177	0.097	0.0308	0.3965	1.9775	-22.9259		39.203	-0.1529	-4.5023	-1.1164	0.0634	-3.0595
39.265	-4.9325	5.683	0.4888	-1.8663	0.3306	-0.0324	-0.6821	4.4777	-26.0108		39.281	0.1727	4.7179	-0.0896	-0.0468	0.1897	-0.047	-2.5221	5.3111	-20.6576		39.281	0.7587	4.2484	-2.5722	-0.0213	0.3288	-0.1879	-0.809	5.5035	-30.6383		39.281	-3.1353	1.1185	-0.9215	-1.2688	0.073	0.0235	0.6503	2.1057	-23.8332		39.266	-0.1529	-4.5675	-1.1294	0.0821	-3.135
39.328	-4.8674	5.683	0.4888	-1.7538	0.3409	-0.0227	-0.9993	4.4136	-25.8294		39.344	0.1857	4.6266	-0.0766	-0.0468	0.1863	-0.0445	-2.9663	4.8624	-20.5668		39.343	0.7457	4.2354	-2.5397	-0.0315	0.3254	-0.1977	-1.0628	5.7599	-29.9124		39.344	-3.2264	1.1185	-0.928	-1.3301	0.097	0.0187	0.0158	1.7211	-24.0147		39.328	-0.1529	-4.6457	-1.1294	0.077	-3.2861
39.39	-4.8023	5.6699	0.4823	-1.6124	0.3426	-0.03	-1.0628	4.2213	-25.0128		39.406	0.1857	4.5353	-0.0636	-0.0605	0.1932	-0.0275	-1.8876	5.4394	-20.4761		39.406	0.7718	4.2354	-2.5007	-0.0315	0.3185	-0.1977	-1.2531	5.5676	-31.1827		39.406	-3.2916	1.1185	-0.9215	-1.3847	0.1176	0.0162	-0.0476	2.0416	-22.9259		39.391	-0.1789	-4.737	-1.1359	0.0549	-3.3428
39.453	-4.7241	5.6569	0.4693	-1.5204	0.3254	-0.0445	-1.6338	4.5419	-25.4664		39.469	0.1727	4.4832	-0.0636	-0.0911	0.2516	-0.0421	-1.5069	5.1829	-20.5668		39.468	0.7457	4.2354	-2.4682	-0.023	0.3271	-0.1977	-0.7455	5.3111	-30.0031		39.469	-3.3697	1.1316	-0.928	-1.5209	0.0455	0.0187	0.6503	3.0033	-23.4703		39.453	-0.1789	-4.8283	-1.1489	0.0958	-3.3978
39.515	-4.659	5.6308	0.4563	-1.3688	0.3306	-0.03	-1.7607	3.6443	-24.5591		39.531	0.1727	4.3919	-0.0636	-0.0656	0.243	-0.0275	-1.3166	5.3753	-21.3834		39.531	0.7457	4.2484	-2.4357	-0.0332	0.3271	-0.1612	-0.3648	5.6958	-30.1846		39.531	-3.4348	1.1185	-0.9215	-1.5278	0.1176	0.0357	-0.5552	2.4263	-23.8332		39.516	-0.205	-4.8935	-1.1489	0.0634	-3.3892
39.578	-4.5939	5.6178	0.4563	-1.2564	0.3374	-0.0421	-1.8876	4.1572	-23.924		39.594	0.1857	4.3006	-0.0701	-0.0451	0.1846	-0.0445	-2.8394	4.9906	-20.839		39.593	0.7327	4.2354	-2.3967	-0.0315	0.3357	-0.1466	-0.4283	4.8624	-30.2753		39.594	-3.539	1.1185	-0.9215	-1.5806	0.0884	0.0162	-0.6821	2.4263	-24.1054		39.578	-0.218	-4.9848	-1.1684	0.0719	-3.4562
39.64	-4.5288	5.6047	0.4498	-1.1627	0.346	-0.0372	-2.078	3.5802	-24.5591		39.656	0.1727	4.2223	-0.0571	-0.0792	0.1331	-0.047	-2.8394	5.1188	-20.5668		39.656	0.7197	4.2354	-2.3577	-0.0298	0.3168	-0.1563	-0.9359	5.7599	-30.5475		39.656	-3.6041	1.1185	-0.928	-1.6674	0.0661	0.0162	0.3331	2.2981	-24.7406		39.641	-0.231	-5.063	-1.1749	0.0804	-3.585
39.703	-4.4637	5.5917	0.4368	-1.1099	0.3409	-0.0421	-1.3166	4.3495	-24.6498		39.719	0.1857	4.1441	-0.0441	-0.0605	0.1073	-0.0275	-2.3952	5.3111	-20.6576		39.718	0.7327	4.2354	-2.3122	-0.0128	0.3374	-0.1612	-0.9993	5.3111	-30.8197		39.719	-3.6953	1.1185	-0.9215	-1.7066	0.1056	0.0114	-0.6186	2.234	-24.3776		39.703	-0.231	-5.1413	-1.1814	0.0855	-3.7275
39.765	-4.3855	5.5525	0.4238	-1.0042	0.3306	-0.03	-1.38	4.1572	-24.922		39.781	0.1727	4.0528	-0.0376	-0.0383	0.1777	-0.0397	-2.3318	4.9906	-20.9298		39.781	0.7327	4.2354	-2.2797	-0.0162	0.3271	-0.1636	-1.2531	5.6958	-30.3661		39.781	-3.7734	1.1316	-0.9215	-1.7918	0.085	0.0308	-0.3014	2.4263	-24.5591		39.766	-0.2441	-5.2065	-1.1814	0.0907	-3.8529
39.828	-4.2813	5.5395	0.4238	-0.8952	0.3374	-0.0105	-1.9511	3.452	-24.7406		39.844	0.1857	3.9746	-0.0376	-0.0196	0.1726	-0.0251	-1.6973	5.5035	-21.1112		39.843	0.7197	4.2354	-2.2537	-0.0247	0.3185	-0.1369	-0.4917	5.5676	-30.6383		39.844	-3.8255	1.1185	-0.9215	-1.8719	0.0867	0.0454	0.3965	2.7468	-24.1054		39.828	-0.231	-5.3108	-1.1879	0.0907	-3.9147
39.89	-4.2292	5.5134	0.4043	-0.8288	0.3357	-0.0324	-2.2049	3.5802	-24.3776		39.906	0.1857	3.8833	-0.0376	-0.0247	0.1502	-0.0421	-1.7607	5.9522	-19.7502		39.906	0.7067	4.2223	-2.2147	-0.0349	0.3323	-0.1393	-0.3648	5.4394	-30.4568		39.906	-3.9037	1.1316	-0.9345	-1.9008	0.1125	0.0454	0.0158	2.7468	-23.8332		39.891	-0.2571	-5.376	-1.1879	0.0941	-3.9284
39.953	-4.1251	5.4873	0.3783	-0.7368	0.3391	-0.0202	-1.2531	4.4136	-24.8313		39.969	0.1727	3.8181	-0.0311	-0.0622	0.109	-0.0251	-2.3318	4.9906	-21.1112		39.968	0.7197	4.2354	-2.1757	-0.0264	0.3271	-0.1369	-0.6186	5.5676	-30.2753		39.969	-3.9948	1.1316	-0.915	-2.0184	0.042	0.0114	-0.5552	2.5545	-23.8332		39.953	-0.2441	-5.4543	-1.2009	0.1009	-4.028
40.015	-4.086	5.4482	0.3653	-0.6516	0.3117	-0.0275	-1.7607	4.029	-23.8332		40.031	0.1727	3.7268	-0.0181	-0.0673	0.1004	-0.0275	-1.5704	5.5035	-20.4761		40.031	0.7197	4.2093	-2.1432	-0.0264	0.3306	-0.1296	-0.4917	5.0547	-31.4549		40.031	-4.073	1.1185	-0.9215	-2.0525	0.1245	0.0065	-1.5069	2.234	-24.922		40.016	-0.231	-5.5325	-1.2074	0.0992	-4.1465
40.078	-4.0078	5.4352	0.3458	-0.6005	0.3563	-0.0105	-1.1897	4.0931	-24.7406		40.094	0.1727	3.6485	-0.0246	-0.0536	0.0764	-0.0397	-2.2683	5.6958	-21.0205		40.093	0.7067	4.2354	-2.1043	-0.0315	0.322	-0.1272	-0.7455	5.0547	-30.6383		40.094	-4.1511	1.1055	-0.928	-2.1359	0.0541	0.0162	-0.809	2.2981	-25.1942		40.078	-0.2441	-5.5716	-1.2139	0.1315	-4.2547
40.14	-3.9427	5.3961	0.3263	-0.5136	0.3409	-0.0154	-1.1262	4.2854	-24.8313		40.156	0.1727	3.5703	-0.0116	-0.0758	0.0953	-0.0372	-1.8242	6.1446	-20.839		40.156	0.7197	4.2354	-2.0653	-0.0281	0.3254	-0.1223	-1.0628	5.5035	-30.6383		40.156	-4.2292	1.0794	-0.9215	-2.2041	0.0609	0.0089	-0.9359	2.6827	-24.2869		40.141	-0.2441	-5.7021	-1.2269	0.1281	-4.3543
40.203	-3.8385	5.383	0.2938	-0.4829	0.3306	-0.0348	-1.5069	4.1572	-24.2869		40.219	0.1857	3.492	0.0144	-0.057	0.0489	-0.0348	-2.0145	5.5676	-20.6576		40.218	0.7067	4.2223	-2.0263	-0.0196	0.3203	-0.1223	-0.8724	5.6958	-31.0012		40.219	-4.3204	1.0794	-0.9215	-2.2995	0.1056	0.0405	-0.4917	2.234	-25.0128		40.203	-0.2571	-5.7803	-1.2399	0.106	-4.4522
40.265	-3.7734	5.37	0.2743	-0.4012	0.3443	-0.0202	-1.6338	4.029	-23.1074		40.281	0.1597	3.4007	0.0079	-0.0383	0.0438	-0.0275	-1.38	5.5676	-21.1112		40.281	0.6936	4.2354	-1.9808	-0.0196	0.3271	-0.1247	-0.9359	5.4394	-30.8197		40.281	-4.3725	1.0533	-0.928	-2.3284	0.0661	0.0381	-0.4917	2.4904	-24.7406		40.266	-0.2701	-5.8455	-1.2659	0.1469	-4.5999
40.328	-3.6953	5.3178	0.2548	-0.3603	0.3443	-0.0397	-2.0145	3.5161	-24.0147		40.344	0.1857	3.3225	0.0144	-0.0656	0.03	-0.0251	-1.6338	5.3111	-21.3834		40.343	0.6806	4.2223	-1.9483	-0.0093	0.3237	-0.1247	-1.0628	5.247	-30.5475		40.344	-4.4637	1.0272	-0.928	-2.4289	0.0953	0.0284	-0.7455	3.0033	-24.4684		40.328	-0.2701	-5.9368	-1.2724	0.1384	-4.7012
40.39	-3.6171	5.3308	0.2224	-0.3143	0.322	-0.0421	-1.7607	3.9008	-24.2869		40.406	0.1727	3.2573	0.0274	-0.0673	0.0077	-0.0445	-1.8876	5.4394	-20.4761		40.406	0.6806	4.2223	-1.9028	-0.0315	0.3357	-0.1004	-0.3648	5.3111	-31.4549		40.406	-4.5288	1.0272	-0.928	-2.555	0.1193	0.0162	-0.3014	4.3495	-25.3757		40.391	-0.3092	-6.002	-1.2919	0.1741	-4.7888
40.453	-3.539	5.3178	0.1964	-0.3092	0.334	-0.0227	-1.4435	3.7084	-24.1962		40.469	0.1727	3.166	0.0339	-0.0366	-0.0404	-0.0421	-2.1414	5.3111	-21.202		40.468	0.6936	4.2223	-1.8833	-0.0196	0.334	-0.1004	-1.0628	5.247	-30.8197		40.469	-4.5939	1.0011	-0.928	-2.6266	0.0266	0.0138	-0.809	3.8367	-25.5572		40.453	-0.3092	-6.0542	-1.3114	0.1775	-4.9468
40.515	-3.4609	5.3048	0.1704	-0.2564	0.3529	-0.0251	-1.6338	3.9008	-24.1962		40.531	0.1466	3.1008	0.0534	-0.0639	-0.0713	-0.0251	-2.1414	4.7983	-21.6556		40.531	0.6806	4.2093	-1.8378	-0.0196	0.3237	-0.1029	-0.6821	5.7599	-31.4549		40.531	-4.6851	0.9881	-0.9345	-2.722	0.0815	0.0381	-0.8724	3.2597	-25.0128		40.516	-0.3222	-6.1715	-1.3179	0.1656	-5.1031
40.578	-3.3697	5.2917	0.1379	-0.1848	0.3529	-0.0178	-1.1897	3.8367	-23.3796		40.594	0.1336	3.0225	0.0794	-0.0536	-0.085	-0.03	-2.2683	5.824	-21.7464		40.593	0.6806	4.2093	-1.7988	-0.0179	0.3391	-0.081	-1.1262	5.1829	-30.9105		40.594	-4.7632	0.949	-0.9409	-2.7441	0.0901	0.0284	-0.6186	2.7468	-25.1942		40.578	-0.3352	-6.2498	-1.3309	0.1724	-5.1958
40.64	-3.2785	5.2396	0.0794	-0.1525	0.358	-0.0178	-1.9511	3.3238	-23.7425		40.656	0.1206	2.9313	0.0924	-0.0434	-0.1503	-0.047	-3.0932	5.8881	-21.202		40.656	0.6806	4.2093	-1.7533	-0.0366	0.3409	-0.0859	-0.4917	5.824	-30.9105		40.656	-4.8283	0.949	-0.9539	-2.8191	0.0352	0.0259	0.6503	2.4904	-26.1923		40.641	-0.3743	-6.328	-1.3504	0.1332	-5.3487
40.703	-3.2134	5.2135	0.0404	-0.1235	0.3563	-0.03	-1.0628	2.9392	-23.1074		40.719	0.1466	2.8269	0.1119	-0.0434	-0.1469	-0.0348	-2.7125	5.1188	-21.4742		40.718	0.6676	4.2093	-1.7338	-0.0298	0.334	-0.081	-0.6821	5.5035	-31.2734		40.719	-4.9065	0.9229	-0.9539	-2.8872	0.1176	0.0357	-0.1111	3.1315	-26.0108		40.703	-0.4264	-6.4063	-1.3764	0.1366	-5.4895
40.765	-3.1222	5.1744	0.0014	-0.086	0.3357	-0.0445	-1.5069	2.7468	-22.7444		40.781	0.1206	2.7487	0.1184	-0.0519	-0.1726	-0.047	-3.2201	4.9906	-21.8371		40.781	0.6676	4.1963	-1.6818	-0.0281	0.3288	-0.0883	-0.9359	5.6317	-30.4568		40.781	-4.9846	0.8838	-0.9474	-3.0712	0.1142	0.0332	-0.5552	4.3495	-25.7386		40.766	-0.4785	-6.4845	-1.3959	0.1196	-5.6234
40.828	-3.0441	5.0961	-0.0311	-0.0809	0.358	-0.0251	-1.7607	3.1315	-22.6537		40.844	0.1336	2.6835	0.1119	-0.0417	-0.255	-0.0445	-1.8242	5.247	-22.0186		40.843	0.6546	4.2093	-1.6428	-0.0264	0.3306	-0.081	-0.3014	5.5035	-31.0919		40.844	-5.0758	0.8447	-0.9604	-3.1666	0.0386	0.0332	-0.3648	4.029	-26.283		40.828	-0.5045	-6.5758	-1.4089	0.1418	-5.7213
40.89	-2.966	5.0831	-0.0701	-0.1065	0.3391	-0.0348	-1.0628	3.3238	-22.7444		40.906	0.1206	2.6052	0.1119	-0.0502	-0.2327	-0.0275	-2.3952	4.9265	-21.9278		40.906	0.6546	4.2093	-1.5973	-0.0383	0.3288	-0.081	-1.1897	5.6317	-30.8197		40.906	-5.1539	0.8186	-0.9669	-3.1853	0.0987	0.0259	-0.4283	3.8367	-25.8294		40.891	-0.5176	-6.628	-1.4284	0.1588	-5.8896
40.953	-2.8748	5.0309	-0.1026	-0.0877	0.3409	-0.0251	-1.1897	3.1956	-23.0166		40.969	0.1206	2.5009	0.1314	-0.0536	-0.2842	-0.0445	-2.1414	5.3111	-21.3834		40.968	0.6415	4.2223	-1.5648	-0.0315	0.322	-0.081	-1.1897	5.6317	-30.4568		40.969	-5.206	0.7925	-0.9799	-3.2296	0.0506	0.0284	-0.1111	3.3879	-26.8274		40.953	-0.5436	-6.7323	-1.4414	0.1469	-6.0115
41.015	-2.8097	4.9527	-0.1416	-0.0536	0.3031	-0.03	-1.5704	2.8109	-23.561		41.031	0.1076	2.4618	0.1314	-0.0553	-0.3306	-0.0445	-2.5856	5.8881	-21.9278		41.031	0.6546	4.2093	-1.5323	-0.0213	0.3185	-0.081	-0.5552	5.247	-30.9105		41.031	-5.3102	0.7664	-0.9929	-3.3438	0.0833	0.0308	0.3965	3.3879	-26.0108		41.016	-0.5566	-6.8106	-1.4479	0.1792	-6.1747
41.078	-2.7315	4.8874	-0.1806	-0.0179	0.3357	-0.0324	-0.9359	3.452	-23.1981		41.094	0.1206	2.3705	0.1249	-0.0434	-0.3529	-0.0324	-2.7125	5.6317	-21.6556		41.093	0.6415	4.2093	-1.4739	-0.023	0.334	-0.0761	-0.809	5.3753	-31.0919		41.094	-5.3623	0.7403	-0.9929	-3.4426	0.0661	0.043	-1.0628	4.0931	-26.9182		41.078	-0.5566	-6.8758	-1.4674	0.2014	-6.3172
41.14	-2.6534	4.7962	-0.2131	0.0026	0.3323	-0.0445	-1.8242	2.6827	-22.8352		41.156	0.1336	2.2922	0.1379	-0.057	-0.4182	-0.0494	-3.2835	5.4394	-23.4703		41.156	0.6415	4.1963	-1.4479	-0.0417	0.3357	-0.064	-1.3166	5.7599	-30.4568		41.156	-5.4274	0.7012	-0.9864	-3.5976	0.03	0.043	-0.3648	4.4136	-26.4645		41.141	-0.5696	-6.954	-1.4674	0.2252	-6.5714
41.203	-2.5622	4.744	-0.2456	-0.0128	0.3237	-0.0202	-0.6821	3.0674	-22.6537		41.219	0.1076	2.2009	0.1379	-0.0332	-0.4594	-0.0397	-3.0297	5.5676	-22.6537		41.218	0.6415	4.2093	-1.3959	-0.0281	0.3426	-0.0664	-0.6821	5.8881	-31.0012		41.219	-5.5186	0.6882	-0.9929	-3.6862	0.0506	0.0211	-0.4917	3.6443	-26.1923		41.203	-0.5566	-7.0323	-1.4804	0.2133	-6.7208
41.265	-2.4841	4.6918	-0.2586	0.0026	0.3117	-0.0421	-1.8242	3.1956	-22.2		41.281	0.1076	2.1488	0.1444	-0.0553	-0.4989	-0.0372	-2.4587	5.5035	-22.563		41.281	0.6285	4.1963	-1.3634	-0.023	0.3306	-0.0543	-0.3648	5.0547	-31.3641		41.281	-5.5837	0.6621	-0.9929	-3.739	0.0489	-0.0008	-0.238	4.2854	-27.0089		41.266	-0.5957	-7.1105	-1.4999	0.2338	-6.9372
41.328	-2.3799	4.6788	-0.2846	0.0384	0.3271	-0.0275	-1.5069	2.875	-21.8371		41.344	0.1206	2.0575	0.1509	-0.0434	-0.5178	-0.0275	-2.5221	5.5676	-23.3796		41.343	0.6285	4.2093	-1.3179	-0.023	0.3203	-0.0543	-1.1262	5.6958	-30.6383		41.344	-5.6748	0.649	-0.9994	-3.848	0.0558	0.0308	-0.1111	3.0033	-27.0089		41.328	-0.6087	-7.1888	-1.5129	0.2201	-6.9578
41.39	-2.3278	4.6005	-0.2911	0.0418	0.3065	-0.0324	-1.6338	3.3879	-22.6537		41.406	0.1076	1.9792	0.1509	-0.0196	-0.5796	-0.0445	-2.7759	5.1829	-23.561		41.406	0.6285	4.1963	-1.2789	-0.0179	0.3391	-0.0543	-0.6821	4.9906	-31.0919		41.406	-5.766	0.623	-1.0189	-3.9366	0.0592	0.0332	-0.6821	3.452	-27.644		41.391	-0.6087	-7.254	-1.5194	0.2031	-7.2154
41.453	-2.2497	4.5875	-0.3171	0.0571	0.3288	-0.03	-1.38	2.875	-22.1093		41.469	0.1076	1.901	0.1574	-0.0724	-0.5813	-0.0445	-2.3952	5.5676	-23.561		41.468	0.6025	4.1963	-1.2334	-0.0179	0.3357	-0.0397	-0.8724	5.0547	-31.3641		41.469	-5.8311	0.5969	-1.0124	-4.0985	0.0335	0.0381	-0.4917	3.9008	-27.9162		41.453	-0.6348	-7.3453	-1.5259	0.2014	-7.4095
41.515	-2.1585	4.5484	-0.3301	0.0605	0.3391	-0.0105	-1.5069	3.5161	-22.563		41.531	0.0946	1.8227	0.1574	-0.0332	-0.6655	-0.0421	-2.7125	6.2728	-23.561		41.531	0.6155	4.1963	-1.1879	-0.0179	0.3288	-0.0445	-1.3166	5.7599	-30.8197		41.531	-5.9093	0.5708	-1.0124	-4.233	0.0833	0.0187	-1.1897	4.7342	-27.9162		41.516	-0.6738	-7.4235	-1.5453	0.1912	-7.5915
41.578	-2.0934	4.5353	-0.3236	0.0775	0.3117	-0.03	-1.0628	2.8109	-22.6537		41.594	0.1076	1.7575	0.1574	-0.0622	-0.7153	-0.0372	-2.9028	5.824	-23.3796		41.593	0.6025	4.1963	-1.1554	-0.023	0.3203	-0.0445	-1.0628	5.7599	-30.2753		41.594	-6.0004	0.5447	-1.0254	-4.3523	0.0627	0.0259	-0.9993	4.2854	-27.7348		41.578	-0.6999	-7.5018	-1.5518	0.2099	-7.6963
41.64	-2.0022	4.5223	-0.3301	0.069	0.3168	-0.0275	-1.8876	3.9008	-22.2		41.656	0.1206	1.6663	0.1574	-0.04	-0.8029	-0.0494	-3.6008	4.7342	-24.6498		41.656	0.6025	4.1963	-1.1099	-0.0247	0.322	-0.0445	-1.4435	5.3753	-30.6383		41.656	-6.0656	0.5186	-1.0254	-4.4307	0.0077	0.0454	-0.6821	3.3238	-27.2811		41.641	-0.6999	-7.5278	-1.5453	0.1809	-7.4198
41.703	-1.9111	4.5092	-0.3431	0.1082	0.2876	-0.0445	-2.0145	3.3879	-22.0186		41.719	0.0946	1.575	0.1639	-0.0707	-0.8166	-0.0348	-3.0297	5.9522	-24.2869		41.718	0.6025	4.1832	-1.0709	-0.0179	0.3391	-0.0324	-0.9359	4.9906	-30.729		41.719	-6.1307	0.5186	-1.0254	-4.5363	0.1176	0.0284	-0.6186	4.4136	-27.0996		41.703	-0.6999	-7.5278	-1.5518	0.1707	-6.8015
41.765	-1.859	4.5223	-0.3625	0.1372	0.3477	-0.047	-1.5704	2.8109	-21.5649		41.781	0.0946	1.5098	0.1574	-0.0588	-0.8802	-0.0324	-2.7125	5.5035	-24.4684		41.781	0.6155	4.2093	-1.0319	-0.0196	0.3271	-0.0494	-0.809	4.8624	-30.729		41.781	-6.1958	0.4925	-1.0384	-4.6334	0.03	0.043	-0.6186	4.4136	-27.5533		41.766	-0.7259	-7.5018	-1.5583	0.0907	-6.367
41.828	-1.7418	4.5092	-0.395	0.1491	0.3323	-0.047	-1.8876	2.875	-22.2908		41.844	0.0946	1.4315	0.1639	-0.0366	-0.8475	-0.0397	-2.078	5.3753	-25.9201		41.843	0.6025	4.1963	-0.9994	-0.0213	0.3357	-0.03	-0.5552	5.247	-31.0012		41.844	-6.287	0.4404	-1.0319	-4.802	0.0249	0.0259	-0.6821	4.0931	-28.2792		41.828	-0.6999	-7.4365	-1.5388	0.1026	-6.4237
41.89	-1.6636	4.5092	-0.4145	0.1286	0.3151	-0.047	-1.6973	3.1956	-22.1093		41.906	0.1076	1.3533	0.1574	-0.0605	-0.899	-0.0275	-1.6338	5.4394	-24.922		41.906	0.5764	4.1963	-0.9539	-0.0179	0.3357	-0.03	-0.1111	4.9265	-31.3641		41.906	-6.3521	0.4143	-1.0319	-4.9264	0.0884	0.0308	-0.4283	4.2213	-28.0977		41.891	-0.7129	-7.3453	-1.5194	0.1009	-5.9617
41.953	-1.5855	4.4962	-0.408	0.1389	0.3048	-0.047	-0.9359	2.6827	-21.5649		41.969	0.0946	1.275	0.1639	-0.0792	-1.0038	-0.0372	-3.1566	5.6958	-25.4664		41.968	0.6025	4.1963	-0.915	-0.0349	0.322	-0.0348	-0.5552	5.1188	-30.729		41.969	-6.4302	0.4013	-1.0384	-5.0082	0.03	0.0332	-0.809	4.3495	-28.5514		41.953	-0.7129	-7.2801	-1.5129	0.0651	-5.3864
42.015	-1.4943	4.4832	-0.395	0.1099	0.3409	-0.0348	-1.5704	3.452	-21.6556		42.031	0.1076	1.2098	0.1574	-0.0536	-1.1086	-0.0421	-2.9028	5.0547	-26.4645		42.031	0.5894	4.1963	-0.876	-0.0162	0.3237	-0.0397	-0.8724	5.6958	-30.5475		42.031	-6.4953	0.3752	-1.0449	-5.1325	0.0352	0.0235	-1.38	4.4136	-28.007		42.016	-0.7129	-7.2148	-1.4999	0.0378	-5.1288
42.078	-1.4162	4.4962	-0.4015	0.0997	0.3237	-0.0275	-2.0145	3.3879	-22.4722		42.094	0.1076	1.1185	0.1574	-0.0962	-1.179	-0.0397	-3.4104	5.5676	-25.8294		42.093	0.5894	4.1963	-0.8305	-0.0179	0.3323	-0.0421	-1.38	5.0547	-31.0012		42.094	-6.5995	0.336	-1.0384	-5.2126	0.0884	0.0551	-0.3014	4.3495	-28.3699		42.078	-0.7129	-7.1236	-1.4869	0.0566	-4.873
42.14	-1.338	4.4962	-0.395	0.1423	0.3323	-0.03	-0.7455	3.1315	-22.7444		42.156	0.0946	1.0403	0.1639	-0.0656	-1.2099	-0.03	-2.3952	5.5676	-26.9182		42.156	0.5894	4.1963	-0.785	-0.0349	0.3288	-0.0178	-0.1111	5.1829	-31.3641		42.156	-6.6516	0.323	-1.0384	-5.4017	-0.0026	0.0357	-1.0628	4.9906	-27.9162		42.141	-0.7129	-7.0453	-1.4609	0.0685	-4.7339
42.203	-1.2599	4.4962	-0.395	0.1474	0.3168	-0.0421	-2.2049	3.452	-21.202		42.219	0.0946	0.962	0.1574	-0.0741	-1.2528	-0.0421	-3.0297	5.0547	-27.0996		42.218	0.5764	4.1702	-0.7525	-0.0315	0.3391	-0.0275	-0.4917	5.0547	-31.2734		42.219	-6.7167	0.323	-1.0514	-5.5414	0.0798	0.0357	-0.809	4.8624	-28.0977		42.203	-0.6999	-6.9671	-1.4479	0.043	-4.4539
42.265	-1.1817	4.4962	-0.395	0.1644	0.3134	-0.0518	-1.8876	3.0033	-21.2927		42.281	0.1076	0.8838	0.1444	-0.0894	-1.361	-0.0397	-2.9028	5.6958	-26.8274		42.281	0.5764	4.1702	-0.707	-0.0264	0.3374	-0.0154	-0.5552	5.6317	-30.9105		42.281	-6.8209	0.2839	-1.0514	-5.6657	0.0403	0.0284	-0.9359	5.6317	-29.2773		42.266	-0.7129	-6.9019	-1.4284	0.0344	-4.2599
42.328	-1.0906	4.4832	-0.4145	0.1849	0.3271	-0.0445	-1.4435	2.6827	-21.4742		42.344	0.1206	0.7794	0.1379	-0.0911	-1.3936	-0.0178	-4.1084	4.7342	-27.1904		42.343	0.5634	4.1702	-0.6745	-0.0213	0.3185	-0.0275	-0.4283	5.1188	-30.729		42.344	-6.8991	0.2708	-1.0514	-5.7509	0.0129	0.043	-0.8724	4.2854	-29.0051		42.328	-0.6999	-6.8236	-1.4284	0.0583	-3.8958
42.39	-0.9994	4.4832	-0.421	0.161	0.3443	-0.0275	-1.3166	3.1956	-21.6556		42.406	0.1076	0.7142	0.1314	-0.0826	-1.4641	-0.0372	-2.7125	4.7342	-27.0089		42.406	0.5504	4.1832	-0.6225	-0.0247	0.322	-0.03	-0.9359	4.9906	-31.0919		42.406	-6.9772	0.2578	-1.0514	-5.9077	0.0403	0.0284	-0.7455	4.2854	-29.368		42.391	-0.6738	-6.7454	-1.4089	0.0089	-3.8151
42.453	-0.9213	4.4701	-0.421	0.1695	0.3391	-0.03	-0.9993	2.4904	-21.8371		42.469	0.0815	0.636	0.1184	-0.1048	-1.5413	-0.0202	-3.4739	4.8624	-27.1904		42.468	0.5634	4.1702	-0.59	-0.0247	0.3288	-0.0154	-1.2531	5.3111	-31.2734		42.469	-7.0293	0.2317	-1.0449	-6.0286	0.0627	0.0502	-0.7455	5.1829	-28.8236		42.453	-0.6738	-6.6541	-1.3894	0.0532	-3.8048
42.515	-0.8301	4.4962	-0.408	0.144	0.3065	-0.0397	-1.8242	3.5802	-21.4742		42.531	0.1206	0.5447	0.1119	-0.115	-1.6238	-0.0227	-3.0297	4.4777	-27.3718		42.531	0.5504	4.1832	-0.5445	-0.0111	0.3254	-0.0202	-0.6821	5.247	-31.2734		42.531	-7.1205	0.2056	-1.0514	-6.2313	0.0266	0.0454	-1.2531	5.4394	-29.1865		42.516	-0.6608	-6.5889	-1.3699	0.0412	-3.6794
42.578	-0.752	4.4832	-0.4015	0.1372	0.3443	-0.0275	-1.38	2.7468	-21.8371		42.594	0.0946	0.4404	0.1054	-0.1116	-1.7371	-0.0324	-2.7759	4.4136	-27.9162		42.593	0.5504	4.1832	-0.5185	-0.023	0.3237	-0.0251	-1.3166	5.6317	-31.0012		42.594	-7.2246	0.1795	-1.0449	-6.3778	0.0781	0.0478	-1.1897	5.6317	-27.7348		42.578	-0.6348	-6.4976	-1.3569	0.0293	-3.3961
42.64	-0.6738	4.4832	-0.395	0.1712	0.3374	-0.0421	-1.1897	2.6827	-21.8371		42.656	0.1076	0.4013	0.0859	-0.1184	-1.7921	-0.0227	-3.7277	4.3495	-28.0977		42.656	0.5243	4.1702	-0.473	-0.0196	0.3409	-0.0105	-0.4283	5.5035	-31.0012		42.656	-7.2637	0.1535	-1.0579	-6.4341	0.0558	0.0284	-1.6338	4.9265	-28.8236		42.641	-0.6348	-6.4193	-1.3439	0.0293	-3.2003
42.703	-0.6087	4.4832	-0.395	0.2326	0.3237	-0.0397	-1.38	3.1315	-21.6556		42.719	0.1206	0.323	0.0664	-0.103	-1.8934	-0.0178	-3.6642	4.6701	-28.2792		42.718	0.5243	4.1702	-0.4275	-0.0179	0.3254	-0.0227	-1.3166	5.6317	-30.8197		42.719	-7.3419	0.1535	-1.0579	-6.5993	0.0472	0.0478	-1.3166	4.606	-29.1865		42.703	-0.6217	-6.3672	-1.3374	0.0395	-3.1831
42.765	-0.5176	4.4701	-0.4145	0.2513	0.3391	-0.0251	-0.809	2.6827	-21.6556		42.781	0.1206	0.2448	0.0664	-0.1405	-1.9861	-0.0397	-4.0449	4.5419	-27.644		42.781	0.5374	4.1702	-0.395	-0.04	0.3306	-0.0081	-0.809	5.5035	-30.9105		42.781	-7.407	0.1404	-1.0449	-6.7339	0.1107	0.0235	-1.7607	4.5419	-28.6421		42.766	-0.6217	-6.2759	-1.3244	0.0055	-3.1247
42.828	-0.4394	4.4962	-0.434	0.2445	0.3323	-0.047	-1.5069	2.4904	-21.4742		42.844	0.1076	0.1535	0.0599	-0.1337	-2.072	-0.0494	-4.0449	4.029	-28.2792		42.843	0.5243	4.1702	-0.3495	-0.0213	0.3323	-0.0129	-1.3166	4.8624	-31.1827		42.844	-7.4981	0.1013	-1.0579	-6.8327	0.0077	0.0259	-1.6338	5.5676	-28.3699		42.828	-0.6348	-6.1976	-1.3049	0.0378	-3.0303
42.89	-0.3482	4.4832	-0.4275	0.2121	0.31	-0.0397	-1.38	3.3879	-21.7464		42.906	0.1206	0.0883	0.0404	-0.1593	-2.1355	-0.03	-3.0932	3.9649	-28.8236		42.906	0.5243	4.1702	-0.3171	-0.0349	0.3288	-0.0154	-1.4435	4.8624	-30.729		42.906	-7.5633	0.0883	-1.0449	-7.0388	0.0712	0.0357	-1.38	5.5676	-27.9162		42.891	-0.6217	-6.1063	-1.2984	-0.0133	-2.8929
42.953	-0.2962	4.4571	-0.408	0.2121	0.3409	-0.0397	-0.809	2.8109	-21.9278		42.969	0.1727	-0.003	0.0404	-0.1337	-2.2094	-0.0421	-3.347	4.3495	-29.0958		42.968	0.5243	4.1571	-0.2651	-0.0162	0.3271	0.0041	-1.5704	4.7342	-30.2753		42.969	-7.6284	0.0622	-1.0579	-7.0729	0.0335	0.0357	-1.8876	5.824	-29.1865		42.953	-0.6217	-6.0281	-1.2984	0.014	-2.7177
43.015	-0.192	4.4701	-0.3755	0.1695	0.346	-0.0275	-1.2531	3.6443	-21.7464		43.031	0.1727	-0.0682	0.0144	-0.1252	-2.2935	-0.047	-3.2835	4.5419	-29.4587		43.031	0.5374	4.1571	-0.2326	-0.0196	0.3409	-0.0008	-0.9359	4.9906	-30.6383		43.031	-7.7065	0.0361	-1.0644	-7.2279	0.0077	0.043	-1.3166	4.606	-29.6402		43.016	-0.6217	-5.9498	-1.2854	0.0072	-2.6456
43.078	-0.1138	4.4701	-0.356	0.1678	0.3203	-0.0372	-1.9511	3.452	-21.5649		43.094	0.2118	-0.1595	0.0144	-0.0741	-2.3828	-0.0251	-4.2987	4.4136	-29.5495		43.093	0.5113	4.1702	-0.1936	-0.0162	0.334	0.0089	-1.4435	4.9906	-30.0031		43.094	-7.7977	-0.0161	-1.0644	-7.3284	0.0644	0.0478	-1.2531	4.9265	-28.7328		43.078	-0.6217	-5.8846	-1.2724	-0.0048	-2.6198
43.14	-0.0357	4.4832	-0.3431	0.2155	0.3546	-0.0421	-0.8724	2.4904	-21.202		43.156	0.2508	-0.2378	0.0014	-0.1218	-2.479	-0.0324	-4.1718	4.6701	-29.4587		43.156	0.5113	4.1702	-0.1546	-0.0196	0.3271	-0.0154	-1.6973	5.3753	-30.6383		43.156	-7.8628	-0.0552	-1.0709	-7.4358	0.0043	0.043	-1.2531	5.1829	-29.2773		43.141	-0.6217	-5.8064	-1.2659	-0.0099	-2.5941
43.203	0.0425	4.4832	-0.3495	0.2564	0.3546	-0.047	-1.8242	2.4263	-21.5649		43.219	0.2639	-0.3291	0.0014	-0.1456	-2.6026	-0.0178	-4.1084	4.7342	-29.5495		43.218	0.5113	4.1702	-0.1156	-0.0298	0.334	0.0211	-0.5552	4.9906	-30.1846		43.219	-7.9409	-0.0943	-1.0774	-7.6453	-0.0112	0.0308	-0.809	5.6317	-29.1865		43.203	-0.6217	-5.7021	-1.2594	-0.0048	-2.5202
43.265	0.1336	4.4832	-0.3431	0.2632	0.3409	-0.0348	-0.9993	2.4904	-21.9278		43.281	0.2899	-0.3943	-0.0116	-0.1269	-2.6971	-0.0227	-4.2987	4.6701	-30.0031		43.281	0.4983	4.1571	-0.0896	-0.023	0.3271	0.0187	-0.5552	5.1188	-30.2753		43.281	-8.0061	-0.1465	-1.0774	-7.63	0.0455	0.0211	-1.3166	4.606	-27.9162		43.266	-0.6217	-5.6238	-1.2464	0.0106	-2.3674
43.328	0.1987	4.4571	-0.3495	0.3143	0.3512	-0.0324	-1.5069	2.6186	-22.2908		43.344	0.2899	-0.4725	-0.0311	-0.1439	-2.7761	0.0016	-4.2353	4.0931	-31.0919		43.343	0.4983	4.1571	-0.0441	-0.0196	0.3443	0.0235	-0.8724	5.0547	-30.6383		43.344	-8.0451	-0.1465	-1.0774	-7.3727	0.0266	0.043	-1.38	2.7468	-27.2811		43.328	-0.6087	-5.5456	-1.2464	-0.0133	-2.3262
43.39	0.2899	4.4832	-0.3495	0.2905	0.3237	-0.0543	-1.8876	2.875	-20.9298		43.406	0.316	-0.5638	-0.0311	-0.1167	-2.9066	-0.0494	-4.1084	4.2213	-30.9105		43.406	0.4853	4.1702	-0.0051	-0.0264	0.3271	0.0089	-0.4917	5.5676	-30.0031		43.406	-8.0061	-0.1595	-1.0839	-6.8037	0.0266	0.0211	-0.6821	0.3748	-23.2888		43.391	-0.6087	-5.4804	-1.2399	-0.0099	-2.2162
43.453	0.3811	4.4832	-0.3366	0.282	0.3391	-0.03	-1.1262	2.1057	-21.202		43.469	0.342	-0.629	-0.0311	-0.1201	-3.0131	-0.0494	-4.1718	4.2854	-31.5456		43.468	0.4853	4.1702	0.0469	-0.023	0.3409	0.0284	-0.6186	4.7983	-30.8197		43.469	-7.98	-0.1465	-1.0904	-6.7612	-0.0198	0.0284	-1.1262	3.7726	-20.1132		43.453	-0.6348	-5.3891	-1.2269	-0.003	-2.2265
43.515	0.4853	4.4962	-0.2976	0.2581	0.3185	-0.0275	-0.4917	3.1315	-21.9278		43.531	0.355	-0.7073	-0.0376	-0.1422	-3.0972	-0.0129	-3.2835	4.029	-31.1827		43.531	0.4853	4.1571	0.0729	-0.0213	0.3391	0.0308	-0.9359	5.6317	-30.0031		43.531	-7.8888	-0.1595	-1.0904	-6.756	0.0232	0.0332	-1.1262	6.3369	-17.2097		43.516	-0.6217	-5.3108	-1.2074	-0.0099	-2.1647
43.578	0.5374	4.4832	-0.2716	0.2666	0.3065	-0.0372	-1.38	4.5419	-21.7464		43.594	0.355	-0.7855	-0.0441	-0.1678	-3.1883	-0.0105	-2.9663	3.9649	-31.2734		43.593	0.4853	4.1571	0.1249	-0.0315	0.322	0.0235	-0.3648	5.4394	-30.6383		43.594	-7.8237	-0.1595	-1.0904	-6.1564	-0.0215	0.0308	-0.8724	2.4904	-18.2078		43.578	-0.6217	-5.2195	-1.1944	-0.0405	-2.0582
43.64	0.6155	4.4832	-0.2456	0.2683	0.3117	-0.0372	-0.9359	2.9392	-21.2927		43.656	0.3811	-0.8768	-0.0506	-0.178	-3.3359	-0.0129	-3.0932	4.2213	-32.09		43.656	0.4592	4.1571	0.1509	-0.0179	0.3357	0.0162	-0.6821	4.7342	-30.0939		43.656	-7.7586	-0.1595	-1.0904	-5.7884	-0.0009	0.0478	0.2062	-0.2663	-16.8467		43.641	-0.6087	-5.1543	-1.2074	0.014	-2.0067
43.703	0.6936	4.4832	-0.2326	0.3314	0.3374	-0.0251	-0.7455	2.7468	-21.6556		43.719	0.3941	-0.942	-0.0636	-0.1746	-3.4424	-0.0275	-4.1718	4.1572	-30.8197		43.718	0.4722	4.1571	0.1964	-0.0179	0.3357	0.0454	-1.2531	5.4394	-30.1846		43.719	-7.7065	-0.1726	-1.0904	-5.7288	0.0214	0.0235	-0.6821	1.4006	-16.3023		43.703	-0.5957	-5.063	-1.1944	-0.0252	-1.9329
43.765	0.7848	4.4832	-0.2196	0.3433	0.3185	-0.0348	-0.9993	3.1315	-21.9278		43.781	0.368	-1.0072	-0.0701	-0.2002	-3.5987	-0.0129	-4.1084	3.9649	-31.4549		43.781	0.4462	4.1441	0.2354	-0.0213	0.3254	0.0332	-1.1262	5.4394	-30.0939		43.781	-7.6153	-0.1595	-1.0969	-5.5431	-0.0181	0.0405	1.4752	1.5288	-15.6672		43.766	-0.6087	-4.9848	-1.1879	-0.0525	-1.8917
43.828	0.8629	4.4832	-0.2131	0.4063	0.3409	-0.0397	-0.9359	2.5545	-21.2927		43.844	0.4332	-1.1115	-0.0766	-0.1848	-3.6828	-0.0202	-3.4104	3.7726	-31.5456		43.843	0.4722	4.1571	0.2743	-0.0264	0.3374	0.0357	-0.809	4.9906	-30.5475		43.844	-7.5372	-0.1726	-1.0904	-5.3574	0.0214	0.043	0.3331	1.9134	-14.3969		43.828	-0.6217	-4.8935	-1.1879	-0.0235	-1.8453
43.89	0.9541	4.4701	-0.2001	0.4165	0.3512	-0.0348	-0.6186	2.6186	-21.3834		43.906	0.4592	-1.1767	-0.0831	-0.1848	-3.8649	-0.0227	-3.347	4.2213	-31.5456		43.906	0.4592	4.1441	0.3198	-0.0332	0.3443	0.0527	-0.9359	5.3753	-30.2753		43.906	-7.4851	-0.1465	-1.0969	-5.2944	-0.0455	0.0235	0.0158	3.2597	-16.1209		43.891	-0.5957	-4.8413	-1.1814	-0.0473	-1.7766
43.953	1.0453	4.4832	-0.1806	0.42	0.3065	-0.0372	-1.2531	2.6186	-21.6556		43.969	0.4853	-1.2419	-0.1026	-0.2019	-3.9336	-0.0105	-3.4739	4.3495	-32.09		43.968	0.4462	4.1441	0.3653	-0.0281	0.3254	0.0332	-1.1262	5.0547	-29.9124		43.969	-7.407	-0.1595	-1.0969	-5.0678	0.0283	0.0235	0.2062	1.5288	-14.6691		43.953	-0.5957	-4.75	-1.1814	-0.0133	-1.7732
44.015	1.1104	4.4832	-0.1416	0.4302	0.31	-0.0348	-0.6821	2.5545	-21.7464		44.031	0.5243	-1.3332	-0.1091	-0.1627	-4.0109	-0.0227	-3.6642	4.5419	-30.9105		44.031	0.4592	4.1441	0.3913	-0.0162	0.3374	0.0478	-0.4283	4.7342	-29.9124		44.031	-7.3419	-0.1334	-1.0969	-4.768	0.0111	0.0259	0.9676	0.2466	-13.5803		44.016	-0.5957	-4.6588	-1.1749	-0.0184	-1.7199
44.078	1.1885	4.4701	-0.1091	0.4523	0.2842	-0.0421	-1.1262	3.7726	-21.6556		44.094	0.5374	-1.4115	-0.1286	-0.1746	-4.1397	-0.0081	-3.7911	3.9008	-32.09		44.093	0.4332	4.1571	0.4368	-0.0281	0.3254	0.0478	-0.5552	4.9906	-30.2753		44.094	-7.2767	-0.1204	-1.0969	-4.6521	0.0043	0.0502	0.8407	0.8877	-14.1247		44.078	-0.5827	-4.5805	-1.1554	-0.0269	-1.622
44.14	1.2797	4.4701	-0.0831	0.4728	0.2808	-0.0227	0.0158	2.6186	-22.2908		44.156	0.5764	-1.4897	-0.1286	-0.1644	-4.3457	-0.0032	-3.4739	4.606	-31.0919		44.156	0.4201	4.1441	0.4758	-0.0179	0.3254	0.0332	-0.9359	4.8624	-30.0939		44.156	-7.1856	-0.0943	-1.1034	-4.5158	-0.0438	0.0259	0.2062	1.7852	-13.7618		44.141	-0.5957	-4.5153	-1.1619	-0.015	-1.5619
44.203	1.3578	4.4701	-0.0636	0.5	0.3048	-0.0397	-0.809	3.0674	-21.9278		44.219	0.5764	-1.568	-0.1416	-0.1473	-4.4453	0.0016	-3.918	4.1572	-31.9993		44.218	0.4201	4.1571	0.5083	-0.0145	0.3391	0.0405	-1.5069	4.5419	-30.5475		44.219	-7.0944	-0.0813	-1.1034	-4.3932	-0.006	0.0308	0.0158	2.1057	-13.2174		44.203	-0.5957	-4.424	-1.1619	-0.0184	-1.5035
44.265	1.436	4.4832	-0.0506	0.5648	0.267	-0.0445	-1.1262	2.6186	-22.3815		44.281	0.6025	-1.6462	-0.1481	-0.2155	-4.5896	-0.0129	-4.4256	3.6443	-31.6363		44.281	0.4332	4.1571	0.5473	-0.0213	0.3185	0.0454	-0.7455	5.5676	-30.1846		44.281	-7.0423	-0.0813	-1.1034	-4.1819	-0.0473	0.0211	0.5234	2.1057	-13.8525		44.266	-0.5827	-4.3588	-1.1489	-0.0252	-1.4761
44.328	1.5011	4.4832	-0.0376	0.6091	0.2739	-0.0324	0.3331	2.8109	-22.6537		44.344	0.6025	-1.7114	-0.1611	-0.2138	-4.7493	-0.0129	-3.2201	3.7084	-32.09		44.343	0.4201	4.1571	0.5863	-0.0315	0.3288	0.043	-0.3014	5.247	-30.2753		44.344	-6.9772	-0.0422	-1.1034	-4.0184	-0.0473	0.043	1.2214	1.5288	-14.7599		44.328	-0.5827	-4.2675	-1.1489	-0.0405	-1.4675
44.39	1.5923	4.4701	-0.0181	0.6261	0.267	-0.0202	-0.3014	2.8109	-22.6537		44.406	0.6155	-1.8158	-0.1676	-0.2274	-4.8764	0.0016	-4.4891	3.7084	-31.7271		44.406	0.4071	4.1441	0.6253	-0.0298	0.3409	0.0454	-0.0476	5.1188	-30.4568		44.406	-6.886	-0.0161	-1.1034	-3.8174	0.042	0.0114	-0.3648	-0.0739	-13.8525		44.391	-0.5827	-4.1762	-1.1359	-0.0252	-1.4314
44.453	1.6704	4.4832	-0.0051	0.6636	0.2292	-0.0275	-0.4917	2.875	-23.7425		44.469	0.6285	-1.881	-0.1676	-0.2359	-4.9399	-0.0057	-4.4256	3.6443	-31.3641		44.468	0.4201	4.1441	0.6708	-0.0298	0.3443	0.0673	-0.4283	5.247	-30.1846		44.469	-6.8079	0.0231	-1.0969	-3.7731	-0.0232	0.0138	0.1427	0.9518	-14.2155		44.453	-0.5827	-4.098	-1.1294	-0.0337	-1.3747
44.515	1.7616	4.4832	0.0014	0.701	0.2292	-0.0227	-0.0476	2.8109	-23.561		44.531	0.6285	-1.9462	-0.1936	-0.2019	-5.1288	-0.0178	-4.1084	3.452	-31.5456		44.531	0.4201	4.1571	0.7098	-0.0196	0.3443	0.0502	0.0158	5.0547	-30.1846		44.531	-6.7298	0.0491	-1.1034	-3.7288	0.0111	0.0332	-0.1745	1.7852	-12.2193		44.516	-0.5696	-4.0067	-1.1229	-0.0456	-1.3146
44.578	1.8137	4.4701	0.0144	0.7675	0.2069	-0.0445	-0.6186	3.1315	-24.1962		44.594	0.6676	-2.0375	-0.1936	-0.2308	-5.2886	0.0041	-3.5373	3.6443	-31.9993		44.593	0.3941	4.1441	0.7488	-0.0247	0.3391	0.0527	-0.238	5.0547	-30.5475		44.594	-6.6516	0.0883	-1.1034	-3.601	0.0609	0.0284	-0.4283	1.657	-12.7637		44.578	-0.5696	-3.9154	-1.1164	-0.0559	-1.2631
44.64	1.9048	4.4701	0.0144	0.8118	0.1726	-0.0445	-0.8724	3.1315	-23.3796		44.656	0.6806	-2.1157	-0.2066	-0.2308	-5.4431	-0.0202	-4.7429	3.452	-32.6344		44.656	0.4071	4.1441	0.7943	-0.0145	0.322	0.0697	-1.1897	5.1188	-30.3661		44.656	-6.5735	0.1404	-1.0969	-3.4085	-0.0026	0.0187	0.0793	0.8877	-13.5803		44.641	-0.5566	-3.8632	-1.1229	-0.0337	-1.2305
44.703	1.9699	4.4701	0.0079	0.8271	0.2121	-0.0227	0.5234	1.9775	-23.7425		44.719	0.7067	-2.207	-0.2196	-0.2325	-5.5822	0.0041	-4.4891	3.8367	-31.1827		44.718	0.3941	4.1441	0.8268	-0.04	0.3374	0.0624	-1.5069	5.0547	-30.0939		44.719	-6.5214	0.2056	-1.1034	-3.3438	0.0592	0.0114	-0.1111	0.5672	-12.5823		44.703	-0.5696	-3.772	-1.1099	-0.0354	-1.2047
44.765	2.0611	4.4701	0.0079	0.8833	0.1691	-0.0202	-0.4917	2.6186	-24.6498		44.781	0.7457	-2.2852	-0.2326	-0.1916	-5.699	0.0041	-3.7911	4.029	-32.6344		44.781	0.3811	4.1571	0.8722	-0.0315	0.3288	0.0916	-0.4917	5.0547	-30.6383		44.781	-6.4432	0.2187	-1.1034	-3.1053	0.0506	0.0405	0.5869	0.1184	-13.3081		44.766	-0.5436	-3.6937	-1.1034	-0.0286	-1.1395
44.828	2.1392	4.4701	0.0079	0.9174	0.1314	-0.0494	-1.1262	1.8493	-24.6498		44.844	0.7718	-2.3635	-0.2456	-0.1882	-5.8158	-0.0057	-3.347	3.1956	-32.4529		44.843	0.3811	4.1571	0.9177	-0.0332	0.3306	0.0624	-1.6338	5.4394	-30.2753		44.844	-6.3781	0.2317	-1.0969	-3.0473	0.0249	0.0187	0.0158	0.5672	-12.1286		44.828	-0.5566	-3.6024	-1.0969	-0.0576	-1.1137
44.89	2.2174	4.4701	0.0079	0.9447	0.1623	-0.0445	-0.3014	2.8109	-25.1035		44.906	0.7978	-2.4287	-0.2586	-0.2002	-5.9274	0.0211	-2.9663	3.7084	-32.7251		44.906	0.3811	4.1441	0.9502	-0.0162	0.3306	0.0673	-1.8242	5.1188	-30.0031		44.906	-6.287	0.2187	-1.0969	-2.9468	0.0472	0.0089	0.0793	1.4006	-12.0379		44.891	-0.5566	-3.5372	-1.0969	-0.0337	-1.045
44.953	2.2955	4.4832	0.0079	1.0264	0.1039	-0.047	-1.0628	2.8109	-25.7386		44.969	0.7978	-2.4939	-0.2651	-0.2138	-6.0717	-0.0057	-3.7911	3.5161	-31.5456		44.968	0.368	4.1441	0.9892	-0.04	0.3306	0.0794	-1.4435	5.247	-30.4568		44.969	-6.2088	0.2056	-1.1099	-2.8889	-0.0078	0.0235	0.0793	1.5288	-13.2174		44.953	-0.5436	-3.4459	-1.0904	-0.0695	-1.0021
45.015	2.3867	4.4832	0.0144	1.0418	0.1159	-0.0348	-0.1745	1.7852	-25.8294		45.031	0.8108	-2.5722	-0.2781	-0.2308	-6.3705	-0.0008	-5.4408	3.3879	-32.3622		45.031	0.3811	4.1441	1.0412	-0.0179	0.3254	0.0867	-0.8724	5.1829	-29.8217		45.031	-6.1176	0.2317	-1.1034	-2.722	0.0026	0.0211	0.46	0.503	-11.8564		45.016	-0.5436	-3.3677	-1.0839	-0.0388	-0.9849
45.078	2.4648	4.4832	0.0079	1.1014	0.1142	-0.0494	-0.809	1.657	-26.283		45.094	0.8369	-2.6374	-0.2846	-0.2768	-6.5199	0.0041	-5.8215	3.1315	-32.3622		45.093	0.368	4.1441	1.0932	-0.0145	0.3254	0.0989	-0.8724	5.0547	-30.0939		45.094	-6.0656	0.2578	-1.1034	-2.6044	0.018	0.0016	0.7138	0.2466	-12.5823		45.078	-0.5566	-3.2894	-1.0839	-0.0576	-0.9557
45.14	2.5299	4.4832	-0.0051	1.1491	0.0592	-0.0324	-0.4283	1.9134	-26.4645		45.156	0.8369	-2.7156	-0.3041	-0.2444	-6.6418	-0.0032	-4.1718	3.9008	-33.3603		45.156	0.3811	4.1441	1.1192	-0.0298	0.3271	0.111	-0.1745	5.247	-30.3661		45.156	-6.0004	0.2839	-1.0969	-2.5499	0.0008	0.0138	0.6503	-0.4586	-11.7657		45.141	-0.5436	-3.2242	-1.0709	-0.061	-0.863
45.203	2.6081	4.4701	0.0079	1.207	0.0833	-0.0445	-0.3014	2.2981	-26.4645		45.219	0.8499	-2.7808	-0.2976	-0.2615	-6.6796	0.0138	-3.7277	3.1956	-33.0881		45.218	0.355	4.1311	1.1712	-0.0247	0.3288	0.1037	-0.8724	5.1829	-30.1846		45.219	-5.9223	0.2969	-1.0969	-2.417	0.0352	0.0187	1.2848	0.6954	-11.4027		45.203	-0.5436	-3.146	-1.0644	-0.0542	-0.8733
45.265	2.6862	4.4832	-0.0116	1.2462	0.085	-0.0324	0.6503	2.3622	-27.5533		45.281	0.889	-2.8721	-0.3236	-0.2291	-6.8943	0.0065	-4.4256	3.2597	-32.8159		45.281	0.355	4.1441	1.2102	-0.0196	0.334	0.1013	-0.238	5.3111	-30.4568		45.281	-5.8442	0.3491	-1.1034	-2.3301	0.0026	-0.0129	0.1427	0.6954	-11.8564		45.266	-0.5176	-3.0547	-1.0514	-0.0116	-0.8407
45.328	2.7644	4.4701	-0.0181	1.2973	0.0129	-0.0397	-0.5552	2.5545	-26.9182		45.344	0.902	-2.9634	-0.3301	-0.2053	-7.169	-0.0008	-6.0753	4.4136	-32.09		45.343	0.342	4.1441	1.2492	-0.0434	0.3237	0.1061	-0.7455	5.4394	-30.5475		45.344	-5.74	0.3621	-1.0904	-2.2637	0.0455	0.0065	0.0158	0.8236	-11.312		45.328	-0.5306	-3.0025	-1.0514	-0.0559	-0.7754
45.39	2.8425	4.4701	-0.0181	1.3177	0.0541	-0.0348	0.7138	2.8109	-27.3718		45.406	0.9541	-3.0416	-0.3301	-0.1712	-7.2686	0.0016	-4.3622	3.9649	-33.1788		45.406	0.355	4.1441	1.2882	-0.0366	0.3237	0.0916	-0.8724	5.4394	-29.5495		45.406	-5.6748	0.4013	-1.0904	-2.2194	0.0386	0.0065	0.46	0.7595	-10.9491		45.391	-0.5045	-2.8982	-1.0449	-0.0542	-0.7496
45.453	2.9467	4.4832	-0.0311	1.3723	0.0197	-0.0324	0.1427	2.875	-27.0089		45.469	0.9411	-3.1199	-0.356	-0.2138	-7.4215	0.0235	-4.616	4.0931	-33.0881		45.468	0.355	4.1311	1.3337	-0.023	0.3409	0.1134	-0.5552	5.7599	-29.4587		45.469	-5.6097	0.4273	-1.0839	-2.1172	0.018	0.0357	0.5234	0.8236	-12.0379		45.453	-0.5176	-2.833	-1.0449	-0.0542	-0.6913
45.515	3.0118	4.4701	-0.0441	1.4421	-0.0129	-0.0348	-0.0476	2.4263	-27.5533		45.531	0.9671	-3.1851	-0.356	-0.2461	-7.5709	0.0114	-3.8546	3.8367	-33.2695		45.531	0.342	4.1441	1.3727	-0.0093	0.3374	0.0916	-1.7607	4.6701	-30.3661		45.531	-5.5316	0.4404	-1.0774	-2.0031	-0.0043	0.0187	0.2696	0.3107	-11.312		45.516	-0.4915	-2.7547	-1.0254	-0.0695	-0.6792
45.578	3.0769	4.4571	-0.0441	1.5324	0.0129	-0.0324	0.6503	1.7211	-27.7348		45.594	0.9801	-3.2503	-0.3755	-0.2444	-7.7272	0.0211	-4.4891	3.0674	-32.8159		45.593	0.342	4.1311	1.3987	-0.0366	0.3306	0.1013	-0.5552	5.5035	-30.4568		45.594	-5.4404	0.4795	-1.0839	-1.9076	0.0472	0.0454	1.2848	-0.0739	-10.9491		45.578	-0.4915	-2.6765	-1.0189	-0.0559	-0.6964
45.64	3.1551	4.4701	-0.0571	1.5971	-0.0593	-0.0445	-0.8724	1.7211	-28.9143		45.656	0.9932	-3.3416	-0.3755	-0.2155	-7.6018	0.0041	-3.2201	3.1956	-32.5437		45.656	0.329	4.1441	1.4441	-0.0093	0.334	0.1159	-0.3648	5.3111	-30.3661		45.656	-5.3623	0.5186	-1.0709	-1.8412	0.0352	0.0211	0.5869	0.3748	-11.1305		45.641	-0.4785	-2.5722	-1.0059	-0.0525	-0.6208
45.703	3.2462	4.4832	-0.0766	1.6687	-0.0833	-0.0251	0.9676	2.0416	-29.0051		45.719	1.0062	-3.3546	-0.3755	-0.1831	-7.2085	-0.0081	-1.4435	3.1956	-33.8139		45.718	0.3029	4.1441	1.4896	-0.0264	0.3477	0.1256	-0.6821	5.247	-29.8217		45.719	-5.2972	0.5186	-1.0579	-1.7901	0.0798	0.043	0.9041	0.8877	-10.0417		45.703	-0.4655	-2.4939	-1.0059	-0.0678	-0.5676
45.765	3.3244	4.4962	-0.0831	1.7147	-0.0369	-0.0324	0.7772	1.9775	-28.7328		45.781	1.0192	-3.3546	-0.3755	-0.1456	-6.9475	-0.0129	-2.649	3.7726	-31.9993		45.781	0.316	4.1441	1.5351	-0.0332	0.334	0.1377	-0.4283	4.606	-29.7309		45.781	-5.219	0.5447	-1.0644	-1.7066	0.085	0.0405	0.46	1.1441	-10.8583		45.766	-0.4655	-2.4287	-0.9929	-0.0422	-0.5144
45.828	3.4155	4.4832	-0.0961	1.8458	-0.1005	-0.0397	0.2696	1.9775	-29.9124		45.844	1.0192	-3.2764	-0.3755	-0.1525	-6.5937	0.0089	-2.2683	4.1572	-29.9124		45.843	0.3029	4.1311	1.5741	-0.0093	0.3409	0.1377	-0.7455	5.3111	-30.0939		45.844	-5.1539	0.5577	-1.0579	-1.6436	0.0249	0.0187	0.3965	0.4389	-11.4935		45.828	-0.4524	-2.3635	-0.9929	-0.0371	-0.5298
45.89	3.4937	4.4832	-0.1026	1.8782	-0.0576	-0.0275	0.9041	1.5929	-29.8217		45.906	1.0062	-3.1981	-0.3625	-0.1354	-6.2915	0.0016	-2.8394	4.4777	-29.8217		45.906	0.3029	4.1441	1.6066	-0.0332	0.3409	0.1402	-1.1262	5.5676	-29.2773		45.906	-5.0627	0.5708	-1.0579	-1.5346	0.0317	0.0211	0.3331	0.1184	-10.4954		45.891	-0.4655	-2.2722	-0.9799	-0.0627	-0.4835
45.953	3.5458	4.4701	-0.1156	1.9481	-0.0833	-0.0372	0.7772	1.9775	-29.5495		45.969	1.0062	-3.1199	-0.356	-0.0894	-6.1249	-0.0178	-4.9967	5.1188	-27.8255		45.968	0.3029	4.1441	1.6456	-0.0383	0.3426	0.1499	-0.6186	5.0547	-29.368		45.969	-4.9846	0.5838	-1.0514	-1.4562	0.0695	0.0187	-0.238	0.0543	-10.8583		45.953	-0.4524	-2.22	-0.9734	-0.049	-0.4732
46.015	3.65	4.4832	-0.1286	2.0452	-0.0713	-0.03	1.2848	1.7211	-29.1865		46.031	1.0062	-3.0416	-0.3431	-0.1065	-5.6337	-0.0081	-1.0628	4.8624	-27.7348		46.031	0.2899	4.1311	1.6781	-0.0213	0.3426	0.1499	-1.5704	4.8624	-28.8236		46.031	-4.9065	0.5838	-1.0514	-1.3898	0.0575	0.0187	0.9041	-0.2021	-10.9491		46.016	-0.4655	-2.1548	-0.9734	-0.0695	-0.4045
46.078	3.7281	4.4701	-0.1416	2.1406	-0.0541	-0.0324	1.0945	1.5288	-29.2773		46.094	1.0192	-2.9895	-0.3301	-0.0468	-5.2645	-0.0348	0.3331	4.3495	-27.3718		46.093	0.2899	4.1311	1.7171	-0.0298	0.3512	0.1645	-0.7455	4.6701	-29.9124		46.094	-4.8283	0.5969	-1.0384	-1.3693	0.0197	-0.0129	1.2848	0.0543	-9.951		46.078	-0.4394	-2.0505	-0.9669	-0.0456	-0.3735
46.14	3.7932	4.4832	-0.1611	2.2462	-0.1159	-0.0348	1.0945	1.5288	-30.0031		46.156	1.0192	-2.8982	-0.3171	-0.1048	-5.1958	-0.0154	-1.5069	4.6701	-26.3738		46.156	0.2769	4.1441	1.7561	-0.0315	0.3495	0.1475	-1.3166	4.9906	-29.368		46.156	-4.7372	0.623	-1.0384	-1.2705	0.0506	0.0065	0.7772	0.1825	-11.0398		46.141	-0.4524	-1.9462	-0.9669	-0.0559	-0.3358
46.203	3.8714	4.5092	-0.1741	2.3075	-0.1056	-0.0518	1.4752	1.08	-30.4568		46.219	0.9801	-2.7939	-0.3041	-0.1252	-5.0344	-0.0324	-3.0932	5.247	-26.283		46.218	0.2899	4.1311	1.8016	-0.0417	0.3357	0.1596	-0.238	5.3111	-28.8236		46.219	-4.659	0.6099	-1.0384	-1.2245	0.0317	0.0065	0.5234	0.4389	-10.3139		46.203	-0.4524	-1.881	-0.9539	-0.0371	-0.3684
46.265	3.9365	4.5353	-0.2001	2.4438	-0.1194	-0.0421	1.1579	1.3365	-30.0031		46.281	0.9541	-2.7287	-0.2781	-0.0809	-4.7012	-0.047	-2.9663	5.247	-25.7386		46.281	0.2899	4.1311	1.8341	-0.0349	0.3323	0.1791	-0.1745	5.1188	-28.7328		46.281	-4.5939	0.636	-1.0384	-1.1325	0.0901	0.0114	0.1427	-0.715	-10.6769		46.266	-0.4394	-1.8027	-0.9539	-0.0507	-0.3203
46.328	4.0146	4.5484	-0.2131	2.6193	-0.1314	-0.03	1.0945	1.0159	-30.5475		46.344	0.9411	-2.6634	-0.2716	-0.069	-4.6068	-0.0105	-2.3952	5.1829	-25.1942		46.343	0.2769	4.1441	1.8796	-0.0247	0.3288	0.1499	-0.6186	4.9265	-29.6402		46.344	-4.5158	0.6751	-1.0384	-1.0916	0.0764	0.0065	0.5234	-0.3304	-10.5861		46.328	-0.4524	-1.6854	-0.9604	-0.0269	-0.2413
46.39	4.0928	4.5875	-0.2326	2.7079	-0.1211	-0.0251	1.2214	0.6313	-30.2753		46.406	0.915	-2.5852	-0.2586	-0.0707	-4.2272	-0.0348	-1.1262	4.5419	-24.8313		46.406	0.2639	4.1311	1.9186	-0.0383	0.3323	0.1742	-0.9993	4.7983	-29.2773		46.406	-4.4376	0.6882	-1.0384	-1.0729	0.0506	0.0235	1.1579	0.5672	-10.1325		46.391	-0.4394	-1.6462	-0.9539	-0.0763	-0.14
46.453	4.1709	4.6397	-0.2586	2.7743	-0.085	-0.0421	0.6503	1.3365	-30.9105		46.469	0.902	-2.52	-0.2391	-0.0928	-3.992	-0.0494	-0.9359	5.1188	-25.0128		46.468	0.2508	4.1311	1.9381	-0.0298	0.3237	0.1791	-1.0628	5.3753	-29.368		46.469	-4.3595	0.7142	-1.0384	-1.0303	0.0455	0.0041	0.5234	-0.3304	-10.0417		46.453	-0.4394	-1.5419	-0.9539	-0.0763	-0.1503
46.515	4.2751	4.6788	-0.2781	2.8612	-0.1383	-0.0445	0.6503	1.4647	-30.9105		46.531	0.876	-2.4417	-0.2261	-0.0979	-3.9902	-0.0154	-1.8242	5.0547	-23.924		46.531	0.2508	4.1311	1.9836	-0.0196	0.3271	0.1596	-1.8242	4.8624	-28.9143		46.531	-4.2683	0.7273	-1.0254	-0.9622	0.0695	0.0016	0.46	0.503	-10.2232		46.516	-0.4524	-1.4636	-0.9474	-0.061	-0.2241
46.578	4.3532	4.7309	-0.2976	3.0179	-0.1005	-0.0445	0.8407	1.1441	-30.8197		46.594	0.8499	-2.3635	-0.2066	-0.0928	-3.8031	-0.0154	-1.38	4.9265	-24.2869		46.593	0.2508	4.1311	2.029	-0.0145	0.3391	0.1888	-0.9993	4.7983	-28.8236		46.594	-4.1902	0.7403	-1.0319	-0.8974	0.0592	0.0211	0.8407	-0.138	-11.0398		46.578	-0.4524	-1.3854	-0.9409	-0.0269	-0.2516
46.64	4.4183	4.7701	-0.3171	3.1678	-0.0661	-0.0445	-0.0476	0.8877	-31.0919		46.656	0.7978	-2.2983	-0.2001	-0.0996	-3.5901	-0.03	-0.4917	4.5419	-23.8332		46.656	0.2508	4.1311	2.0485	-0.0298	0.3203	0.2082	-1.3166	5.7599	-29.0958		46.656	-4.1381	0.7534	-1.0319	-0.8497	0.0489	0.0089	0.8407	-0.138	-10.7676		46.641	-0.4394	-1.3072	-0.9409	-0.0388	-0.2224
46.703	4.4965	4.7962	-0.3495	3.2973	-0.1245	-0.0445	0.0158	1.08	-30.6383		46.719	0.7848	-2.22	-0.1936	-0.1286	-3.4167	-0.0275	-0.4917	5.1829	-23.4703		46.718	0.2508	4.1311	2.094	-0.0128	0.3237	0.2131	-1.3166	5.3753	-28.4606		46.719	-4.0599	0.7794	-1.0319	-0.7816	0.0524	0.0357	0.7772	-0.0739	-10.0417		46.703	-0.4264	-1.2159	-0.9345	-0.0473	-0.0833
46.765	4.5746	4.8483	-0.369	3.4114	-0.0404	-0.0251	0.7772	0.3107	-31.0919		46.781	0.7457	-2.1418	-0.1806	-0.0877	-3.2209	-0.0251	-0.1745	4.4777	-23.1981		46.781	0.2508	4.1441	2.1265	-0.0247	0.3426	0.2325	-1.1262	5.0547	-28.3699		46.781	-3.9688	0.7794	-1.0449	-0.7475	0.0661	0.0259	1.1579	0.1825	-9.951		46.766	-0.4394	-1.1507	-0.9345	-0.0286	-0.0163
46.828	4.6397	4.8614	-0.382	3.5341	-0.0885	-0.0275	0.5869	0.6313	-31.1827		46.844	0.7067	-2.0505	-0.1676	-0.0434	-3.1247	-0.0324	-1.5704	5.3753	-23.1981		46.843	0.2378	4.118	2.159	-0.023	0.3271	0.2228	-0.5552	5.7599	-29.0051		46.844	-3.8776	0.7664	-1.0384	-0.7186	0.0919	0.0041	0.5869	0.503	-10.6769		46.828	-0.4394	-1.0463	-0.928	-0.0473	-0.0284
46.89	4.7309	4.8483	-0.4145	3.6772	-0.0198	-0.0421	1.2214	0.3748	-31.2734		46.906	0.7197	-1.9723	-0.1611	-0.0639	-3.056	-0.0445	-2.3318	6.0163	-23.1981		46.906	0.2378	4.1441	2.1915	-0.0196	0.3237	0.2277	-1.1897	5.1188	-27.9162		46.906	-3.8255	0.7925	-1.0254	-0.6862	0.0627	0.0308	0.8407	0.1184	-9.951		46.891	-0.4524	-0.9811	-0.928	-0.0559	-0.0335
46.953	4.796	4.8614	-0.4405	3.8237	-0.1056	-0.0348	1.3483	1.0159	-30.8197		46.969	0.7197	-1.894	-0.1416	-0.0485	-2.8276	-0.0397	-1.2531	5.3111	-22.6537		46.968	0.2118	4.1441	2.224	-0.0281	0.3426	0.2471	-1.3166	5.3753	-28.4606		46.969	-3.7083	0.7925	-1.0384	-0.6163	0.0815	0.0405	1.2848	0.5672	-10.3139		46.953	-0.4394	-0.9029	-0.915	-0.0507	-0.0455
47.015	4.8742	4.8353	-0.4535	3.977	-0.085	-0.047	0.1427	0.8236	-31.3641		47.031	0.6806	-1.8027	-0.1351	-0.0775	-2.7091	-0.03	-0.6821	5.247	-22.7444		47.031	0.2248	4.1311	2.263	-0.0162	0.3409	0.269	-0.3648	5.6958	-28.4606		47.031	-3.6692	0.8055	-1.0384	-0.6044	0.0764	0.0162	0.2696	-0.2021	-9.951		47.016	-0.4394	-0.8116	-0.9215	-0.0405	-0.0387
47.078	4.9393	4.8614	-0.4925	4.1457	-0.0971	-0.0372	0.7138	0.2466	-30.2753		47.094	0.6415	-1.7375	-0.1286	-0.0826	-2.6044	-0.0494	-1.0628	4.7342	-22.7444		47.093	0.2118	4.1311	2.2955	-0.0145	0.3288	0.2738	-1.1262	5.3753	-27.7348		47.094	-3.5781	0.8055	-1.0384	-0.5431	0.073	0.0187	1.031	-0.5868	-10.2232		47.078	-0.4264	-0.7333	-0.915	-0.0354	0.0283
47.14	5.0174	4.8614	-0.512	4.3433	-0.0593	-0.0372	1.0945	0.503	-31.2734		47.156	0.6155	-1.6593	-0.1091	-0.1065	-2.5151	-0.0348	-0.1745	4.7342	-22.6537		47.156	0.1987	4.1311	2.341	-0.0093	0.3134	0.3006	-1.38	4.9265	-28.4606		47.156	-3.4999	0.8055	-1.0384	-0.5158	0.0558	0.0089	0.7772	0.3107	-10.4047		47.141	-0.4394	-0.6421	-0.915	-0.0593	0.0867
47.203	5.0825	4.8744	-0.5315	4.4796	-0.1486	-0.047	0.5869	-0.2663	-31.6363		47.219	0.5634	-1.581	-0.1026	-0.0996	-2.4567	-0.0348	-1.8876	5.3111	-21.8371		47.218	0.1987	4.118	2.38	-0.0315	0.3151	0.2933	-1.2531	5.4394	-28.2792		47.219	-3.4088	0.8055	-1.0319	-0.5192	0.1039	0.0016	-0.0476	0.6313	-10.1325		47.203	-0.4264	-0.5638	-0.9085	-0.0695	0.0867
47.265	5.1737	4.8483	-0.5575	4.6431	-0.0627	-0.047	0.7138	0.503	-31.2734		47.281	0.5634	-1.5028	-0.0896	-0.0741	-2.3004	-0.0397	-2.2049	5.3753	-21.8371		47.281	0.1987	4.1441	2.4125	-0.0213	0.3185	0.2836	-1.4435	5.6317	-27.7348		47.281	-3.3306	0.8055	-1.0319	-0.4818	0.0833	0.0259	0.0793	0.3748	-9.0437		47.266	-0.4394	-0.4725	-0.889	-0.0405	0.188
47.328	5.2519	4.8614	-0.5835	4.822	-0.0644	-0.0372	1.0945	0.2466	-31.5456		47.344	0.5504	-1.4245	-0.0831	-0.0519	-2.1544	-0.0445	-1.2531	5.3111	-22.0186		47.343	0.1987	4.1311	2.4515	-0.0145	0.3048	0.3224	-1.0628	5.7599	-28.1884		47.344	-3.2525	0.8186	-1.0319	-0.4119	0.0575	-0.0105	0.8407	0.1184	-10.4954		47.328	-0.4394	-0.4073	-0.902	-0.0559	0.255
47.39	5.3039	4.8614	-0.6095	4.9566	-0.0971	-0.0275	0.7138	0.2466	-31.5456		47.406	0.5504	-1.3463	-0.0766	-0.0213	-2.0033	-0.0324	0.0793	5.8881	-22.1093		47.406	0.1727	4.1311	2.4905	-0.0145	0.3117	0.354	-1.2531	5.824	-27.7348		47.406	-3.1874	0.8186	-1.0319	-0.4221	0.0232	0.0332	0.46	-0.0098	-9.4973		47.391	-0.4394	-0.3291	-0.889	-0.0525	0.121
47.453	5.3951	4.8874	-0.629	5.1201	-0.0455	-0.0494	1.4117	0.1184	-31.9993		47.469	0.5504	-1.255	-0.0701	-0.0247	-1.9243	-0.0251	0.1427	6.2087	-22.1093		47.468	0.1857	4.1311	2.5295	0.0213	0.3065	0.3565	-0.6821	5.247	-28.007		47.469	-3.1092	0.8055	-1.0319	-0.3676	0.085	0.0041	0.6503	0.3107	-10.2232		47.453	-0.4394	-0.2378	-0.8825	-0.0695	0.1176
47.515	5.4602	4.8744	-0.655	5.3637	-0.0988	-0.0543	0.7138	0.3748	-31.1827		47.531	0.5374	-1.1767	-0.0636	-0.0264	-1.8298	-0.0251	-0.0476	6.0163	-22.1093		47.531	0.1597	4.1441	2.575	-0.0025	0.3271	0.3832	-0.6186	5.4394	-28.4606		47.531	-3.0441	0.8186	-1.0384	-0.3404	0.0747	0.0405	0.2062	0.2466	-9.6788		47.516	-0.4394	-0.1595	-0.8825	-0.0337	0.1125
47.578	5.5384	4.9005	-0.681	5.4694	-0.1194	-0.03	1.2848	0.4389	-32.1807		47.594	0.4983	-1.0985	-0.0506	-0.0434	-1.7852	-0.0348	-0.7455	6.3369	-21.8371		47.593	0.1597	4.118	2.6075	-0.0008	0.3048	0.4245	-0.809	5.7599	-27.8255		47.594	-2.9399	0.8186	-1.0384	-0.3233	0.0781	-0.0081	0.2696	0.3107	-9.2251		47.578	-0.4264	-0.0682	-0.876	-0.0439	0.1468
47.64	5.6165	4.9005	-0.707	5.6499	-0.0232	-0.0324	1.4752	0.2466	-32.1807		47.656	0.4853	-1.0202	-0.0441	-0.0349	-1.6839	-0.0397	-0.3014	5.8881	-21.9278		47.656	0.1336	4.118	2.6334	-0.0076	0.3254	0.4124	-0.809	5.247	-27.644		47.656	-2.8878	0.8055	-1.0384	-0.3029	0.0712	0.0041	0.8407	-0.138	-9.5881		47.641	-0.4394	0.01	-0.8695	-0.0644	0.1983
47.703	5.6816	4.9135	-0.7265	5.8254	-0.1383	-0.0397	0.2062	-0.0098	-31.6363		47.719	0.4592	-0.942	-0.0376	-0.0349	-1.5465	-0.0348	0.3331	5.7599	-22.1093		47.718	0.1206	4.1441	2.6724	0.0145	0.2962	0.4221	-0.6821	5.247	-27.7348		47.719	-2.7967	0.8186	-1.0384	-0.2654	0.0815	0.0357	0.5869	-0.138	-9.1344		47.703	-0.4264	0.0883	-0.863	-0.0525	0.279
47.765	5.7598	4.9135	-0.746	5.9856	-0.0696	-0.0543	1.4752	0.3748	-31.4549		47.781	0.4201	-0.8638	-0.0246	-0.0213	-1.4744	-0.03	0.0793	5.8881	-21.6556		47.781	0.1206	4.118	2.7179	-0.0042	0.3048	0.4707	-0.6186	5.3111	-27.5533		47.781	-2.7055	0.8316	-1.0384	-0.2313	0.085	0.0162	0.6503	-0.2021	-9.4066		47.766	-0.4264	0.1795	-0.863	-0.0354	0.255
47.828	5.7988	4.9135	-0.772	6.1917	-0.0576	-0.047	0.6503	-0.2021	-31.7271		47.844	0.4071	-0.7855	-0.0116	-0.0656	-1.3851	-0.0397	0.3331	5.3753	-22.0186		47.843	0.0946	4.1311	2.7504	-0.0162	0.2996	0.4634	-1.2531	5.5676	-27.2811		47.844	-2.6274	0.8186	-1.0384	-0.233	0.0455	0.0138	0.5234	-0.3304	-9.6788		47.828	-0.4264	0.2578	-0.8565	-0.0627	0.2378
47.89	5.903	4.9396	-0.798	6.3774	-0.1211	-0.0372	0.7138	0.1184	-31.8178		47.906	0.3811	-0.7073	0.0014	-0.0315	-1.3095	-0.0324	-0.5552	5.5035	-21.4742		47.906	0.0815	4.118	2.7894	0.0009	0.3203	0.5047	-0.3648	5.824	-27.4626		47.906	-2.5622	0.8316	-1.0384	-0.2058	0.0798	0.0187	0.3331	-0.3945	-9.951		47.891	-0.4394	0.3491	-0.8565	-0.0473	0.2979
47.953	5.9812	4.9135	-0.824	6.5341	-0.0593	-0.0372	1.2848	-0.5868	-31.6363		47.969	0.368	-0.629	0.0014	-0.0247	-1.2442	-0.047	-1.3166	5.6317	-22.0186		47.968	0.0555	4.118	2.8349	-0.0093	0.2962	0.5242	-0.6186	6.0804	-27.8255		47.969	-2.4581	0.8055	-1.0189	-0.2279	0.0884	0.0357	-0.3648	-0.0739	-9.4973		47.953	-0.4394	0.4143	-0.8565	-0.0627	0.3134
48.015	6.0333	4.9266	-0.837	6.759	-0.0043	-0.0348	0.9676	-0.6509	-32.3622		48.031	0.368	-0.5247	0.0079	-0.0281	-1.1515	-0.0227	0.0793	6.0163	-22.1093		48.031	0.0425	4.1441	2.8674	-0.0111	0.3048	0.5436	-1.1897	5.7599	-27.0996		48.031	-2.3799	0.8186	-1.0059	-0.2279	0.0815	0.0235	1.031	0.5672	-10.0417		48.016	-0.4264	0.5056	-0.8565	-0.0354	0.3271
48.078	6.1114	4.9396	-0.8565	6.943	-0.1108	-0.0421	0.6503	-0.3304	-31.5456		48.094	0.355	-0.4595	0.0144	-0.0076	-1.045	-0.0348	0.46	5.5035	-22.1093		48.093	0.0164	4.1311	2.9194	-0.0162	0.3237	0.5509	-0.809	5.5035	-28.1884		48.094	-2.3148	0.8186	-0.9864	-0.2007	0.0919	0.0162	0.0793	0.3748	-9.951		48.078	-0.4394	0.5708	-0.8435	-0.0456	0.334
48.14	6.1895	4.9135	-0.8955	7.081	-0.0163	-0.0348	1.5386	-0.0739	-31.4549		48.156	0.355	-0.3812	0.0339	0.0026	-1.0072	-0.047	0.3331	6.6574	-21.202		48.156	0.0164	4.1311	2.9454	-0.0042	0.322	0.5582	-0.6821	5.7599	-27.644		48.156	-2.2236	0.8186	-0.9799	-0.199	0.0695	0.0187	0.7138	0.3748	-9.951		48.141	-0.4394	0.6751	-0.837	-0.0593	0.3649
48.203	6.2807	4.9396	-0.902	7.299	-0.0747	-0.0348	1.2848	-0.4586	-32.7251		48.219	0.355	-0.303	0.0534	0.0026	-0.9317	-0.0494	0.0793	6.1446	-20.9298		48.218	-0.0227	4.1311	2.9974	-0.0042	0.3048	0.6019	-1.1897	5.6317	-27.0089		48.219	-2.1585	0.8186	-0.9799	-0.1138	0.1039	0.0114	0.6503	-0.2021	-10.0417		48.203	-0.4264	0.7534	-0.8435	-0.0746	0.3838
48.265	6.3458	4.9396	-0.915	7.4591	-0.0301	-0.0421	0.7138	-0.3945	-31.8178		48.281	0.355	-0.2247	0.0729	-0.0008	-0.8767	-0.0421	-0.4917	6.3369	-20.839		48.281	-0.0487	4.1441	3.0364	-0.0093	0.3134	0.5971	-0.9993	5.4394	-27.3718		48.281	-2.0934	0.8316	-0.9799	-0.0899	0.0901	0.0162	0.2062	-0.2663	-10.2232		48.266	-0.4394	0.8316	-0.8305	-0.0405	0.3907
48.328	6.437	4.9266	-0.9474	7.6891	-0.0524	-0.0324	0.9676	-0.0098	-32.2715		48.344	0.342	-0.1465	0.0859	-0.0008	-0.8458	-0.047	-0.809	5.8881	-21.3834		48.343	-0.0878	4.1311	3.0689	-0.0588	0.3151	0.6141	-0.809	5.8881	-27.7348		48.344	-2.0022	0.8186	-0.9864	-0.0644	0.0747	0.0235	0.8407	-0.2663	-10.2232		48.328	-0.4394	0.9099	-0.837	-0.0286	0.3649
48.39	6.5021	4.9396	-0.9539	7.5205	-0.0644	-0.047	0.5869	1.2723	-32.2715		48.406	0.3029	-0.0552	0.0859	-0.0213	-0.7393	-0.0518	0.0158	6.3369	-21.0205		48.406	-0.1399	4.1441	3.1079	-0.0196	0.3203	0.6748	-1.1262	5.5676	-26.7367		48.406	-1.9111	0.8186	-0.9734	-0.1172	0.0695	0.0308	0.5869	1.0159	-10.4047		48.391	-0.4264	1.0011	-0.8305	-0.0439	0.3975
48.453	6.4891	4.9527	-0.9474	7.2155	-0.049	-0.0372	0.9676	1.2723	-31.1827		48.469	0.2899	0.0231	0.1054	0.0111	-0.6827	-0.0324	-0.6821	5.6317	-21.9278		48.468	-0.1789	4.118	3.1404	-0.0111	0.3048	0.6724	-0.809	5.3753	-28.2792		48.469	-1.8199	0.8316	-0.9539	-0.1019	0.0884	0.0162	0.6503	0.1825	-10.1325		48.453	-0.4264	1.0794	-0.8175	-0.0456	0.413
48.515	6.437	4.9527	-0.9345	6.8714	0.0403	-0.0664	1.4117	2.3622	-30.1846		48.531	0.2769	0.0883	0.1184	0.0213	-0.5968	-0.0421	0.2062	5.8881	-21.0205		48.531	-0.192	4.1441	3.1859	-0.0366	0.2996	0.6894	-0.6821	5.7599	-28.0977		48.531	-1.7418	0.8186	-0.9409	-0.0984	0.0815	0.0016	-0.3014	0.1184	-10.4047		48.516	-0.4394	1.1576	-0.811	-0.0439	0.4903
48.578	6.3849	4.9527	-0.915	6.529	-0.0541	-0.047	0.9041	2.875	-29.9124		48.594	0.2769	0.1926	0.1249	-0.0213	-0.547	-0.0348	0.2062	5.8881	-21.202		48.593	-0.218	4.1441	3.2313	-0.0264	0.2996	0.704	-1.38	5.5676	-27.9162		48.594	-1.6506	0.8186	-0.9215	-0.0916	0.0953	0.0235	0.2696	-0.2021	-10.1325		48.578	-0.4264	1.2489	-0.811	-0.0371	0.5178
48.64	6.3328	4.9527	-0.902	6.2496	-0.061	-0.03	0.2062	0.8877	-28.1884		48.656	0.2508	0.2578	0.1379	-0.0213	-0.4749	-0.0421	0.6503	6.2087	-21.3834		48.656	-0.2571	4.118	3.2638	-0.0349	0.2876	0.7162	-1.38	5.9522	-28.1884		48.656	-1.5725	0.8055	-0.928	-0.0439	0.085	0.0235	1.031	-0.4586	-9.8603		48.641	-0.4394	1.3141	-0.8045	-0.0371	0.504
48.703	6.2416	4.9527	-0.876	6.006	0.0884	-0.0543	0.9041	1.3365	-27.4626		48.719	0.2508	0.3621	0.1509	-0.0196	-0.4732	-0.0616	-0.5552	5.7599	-21.3834		48.718	-0.3092	4.1311	3.3028	-0.0502	0.2928	0.7405	-0.809	5.7599	-27.9162		48.719	-1.4943	0.8186	-0.928	-0.0218	0.0936	0.0235	1.1579	-0.4586	-10.7676		48.703	-0.4264	1.4054	-0.785	-0.0473	0.4834
48.765	6.1765	4.9527	-0.85	5.5801	0.0163	-0.03	0.9676	3.9649	-28.007		48.781	0.2378	0.4273	0.1509	-0.0315	-0.4371	-0.0251	0.46	6.0163	-20.2946		48.781	-0.3222	4.1441	3.3353	-0.0707	0.279	0.7915	-0.9993	5.6958	-27.9162		48.781	-1.4162	0.8186	-0.915	0.0106	0.0953	0.0089	0.5234	-0.8432	-10.3139		48.766	-0.4264	1.4837	-0.8045	-0.0559	0.4954
48.828	6.1114	4.9657	-0.837	5.3075	-0.0146	-0.0202	0.46	4.3495	-27.8255		48.844	0.2118	0.4925	0.1574	-0.0264	-0.3735	-0.0275	0.8407	6.0163	-21.0205		48.843	-0.3482	4.1441	3.3808	-0.0656	0.2808	0.8134	-1.2531	5.824	-28.007		48.844	-1.338	0.8186	-0.9085	-0.0082	0.097	0.0065	-0.1111	-0.2021	-9.5881		48.828	-0.4264	1.5619	-0.785	-0.0831	0.4748
48.89	6.0593	4.9657	-0.8045	5.1917	0.0541	-0.0372	0.9041	3.0033	-27.0089		48.906	0.2118	0.5708	0.1574	-0.0264	-0.3117	-0.0348	0.3331	5.7599	-20.839		48.906	-0.3613	4.118	3.4263	-0.0298	0.2962	0.8377	-1.38	5.6958	-27.8255		48.906	-1.2338	0.8316	-0.889	-0.0065	0.1125	0.0211	0.5234	0.1825	-9.7695		48.891	-0.4264	1.6402	-0.785	-0.0507	0.5796
48.953	5.9681	4.9657	-0.785	4.9361	0.0335	-0.0348	0.7772	4.029	-26.7367		48.969	0.2118	0.6621	0.1574	-0.0553	-0.2791	-0.0324	-0.0476	6.401	-21.8371		48.968	-0.3873	4.1311	3.4523	-0.0468	0.2893	0.8839	-0.8724	5.5676	-28.1884		48.969	-1.1687	0.8186	-0.876	-0.0422	0.1073	0.0162	0.9676	-0.138	-10.4047		48.953	-0.4134	1.7184	-0.772	-0.0797	0.6259
49.015	5.877	4.9787	-0.759	4.7624	0.0506	-0.0518	0.0793	3.8367	-25.8294		49.031	0.2118	0.7403	0.1509	-0.0179	-0.2344	-0.0275	0.2696	6.5933	-20.7483		49.031	-0.3873	4.1441	3.4913	-0.0724	0.2876	0.9179	-1.0628	5.5035	-28.007		49.031	-1.0906	0.8186	-0.8565	-0.0507	0.085	0.0211	0.46	0.3748	-9.3159		49.016	-0.4264	1.7836	-0.772	-0.0542	0.5967
49.078	5.8249	4.9657	-0.7395	4.6091	0.0129	-0.0348	0.8407	3.452	-26.4645		49.094	0.1987	0.8055	0.1574	-0.0145	-0.2241	-0.0372	-0.238	5.5676	-21.7464		49.093	-0.4134	4.1311	3.5303	-0.0434	0.2893	0.9714	-0.7455	5.5676	-28.0977		49.094	-1.0124	0.8316	-0.8305	-0.0167	0.1125	0.0162	0.6503	0.1825	-10.3139		49.078	-0.4394	1.8749	-0.7525	-0.0729	0.6431
49.14	5.7598	4.9657	-0.707	4.2854	0.0438	-0.0421	-0.0476	4.606	-25.9201		49.156	0.2118	0.8968	0.1444	-0.0162	-0.1778	-0.0494	-0.3648	5.9522	-21.202		49.156	-0.4003	4.118	3.5758	-0.0605	0.2928	1.0054	-0.9993	5.6958	-26.7367		49.156	-0.9343	0.8316	-0.811	-0.0082	0.097	-0.0008	0.0793	0.6313	-9.4973		49.141	-0.4134	1.9662	-0.759	-0.032	0.6672
49.203	5.6946	4.9657	-0.6875	4.0639	0.0369	-0.03	-0.4283	5.247	-26.5552		49.219	0.2118	0.9751	0.1509	-0.0162	-0.1194	-0.0324	0.0158	6.2087	-20.9298		49.218	-0.4394	4.1311	3.6213	-0.0519	0.2739	1.0151	-1.38	5.0547	-27.7348		49.219	-0.8431	0.8055	-0.811	0.0327	0.0833	0.0259	0.8407	0.1184	-10.1325		49.203	-0.4394	2.0444	-0.7525	-0.049	0.6534
49.265	5.6165	4.9657	-0.6615	3.9259	-0.0095	-0.0372	-0.1745	3.7084	-25.4664		49.281	0.2118	1.0533	0.1509	-0.0196	-0.1091	-0.0324	0.3331	5.8881	-20.6576		49.281	-0.4394	4.1311	3.6668	-0.0536	0.2859	1.0734	-0.5552	5.6317	-28.2792		49.281	-0.765	0.8186	-0.798	0.0651	0.0747	0.0284	1.031	-0.5868	-9.6788		49.266	-0.4134	2.1227	-0.7525	-0.1002	0.6706
49.328	5.5384	4.9657	-0.629	3.7385	0.0661	-0.0567	-0.3648	3.1315	-25.0128		49.344	0.2118	1.1576	0.1444	-0.0247	-0.0558	-0.0372	-0.1111	6.8497	-20.3854		49.343	-0.4655	4.1311	3.6993	-0.0536	0.2653	1.1123	-1.1897	5.6317	-27.0996		49.344	-0.6869	0.8055	-0.7915	0.0872	0.0764	0.0235	0.5869	-1.0355	-9.2251		49.328	-0.4264	2.2009	-0.7395	-0.0695	0.7496
49.39	5.4732	4.9657	-0.6095	3.4694	0.0627	-0.03	0.2696	4.4136	-25.6479		49.406	0.2118	1.2098	0.1444	-0.0179	-0.0249	-0.0445	-0.3648	5.5676	-20.3854		49.406	-0.4655	4.1311	3.7448	-0.0332	0.2687	1.1634	-0.9359	4.7342	-27.2811		49.406	-0.6217	0.8186	-0.798	0.1537	0.0884	0.0138	0.8407	-0.9073	-10.0417		49.391	-0.4394	2.2922	-0.733	-0.0525	0.7462
49.453	5.4081	4.9787	-0.577	3.3791	0.0506	-0.0445	0.0793	3.7084	-25.8294		49.469	0.1987	1.3011	0.1314	-0.0298	0.0283	-0.0421	0.2696	6.0804	-20.1132		49.468	-0.4785	4.1311	3.7838	-0.0332	0.2653	1.1901	-0.3648	5.6958	-27.2811		49.469	-0.5176	0.8186	-0.798	0.0651	0.1193	0.0114	0.9676	-0.2663	-9.5881		49.453	-0.4264	2.3705	-0.7265	-0.0473	0.8028
49.515	5.317	4.9657	-0.5445	3.1252	0.0867	-0.0543	-0.3014	4.9906	-25.1942		49.531	0.2118	1.3663	0.1314	-0.0468	0.0833	-0.0421	0.3331	5.8881	-20.3854		49.531	-0.5045	4.1311	3.8162	-0.0383	0.2567	1.2338	-0.6186	5.9522	-26.9182		49.531	-0.4394	0.8055	-0.7525	0.0583	0.0884	0.0114	0.7772	0.0543	-9.951		49.516	-0.4134	2.4748	-0.7135	-0.049	0.8183
49.578	5.2519	4.9787	-0.5185	2.9924	0.0455	-0.047	-0.4283	4.9906	-24.6498		49.594	0.2118	1.4706	0.1314	-0.0366	0.0627	-0.0372	0.6503	6.3369	-20.0224		49.593	-0.5176	4.1311	3.8487	-0.0605	0.2361	1.2849	-0.238	5.6958	-27.7348		49.594	-0.3613	0.8186	-0.733	0.0412	0.0884	0.0308	0.3965	0.4389	-9.951		49.578	-0.4134	2.527	-0.7135	-0.0371	0.8303
49.64	5.1737	4.9787	-0.486	2.8748	0.1228	-0.0518	-0.3648	3.6443	-23.2888		49.656	0.2248	1.5228	0.1249	-0.0349	0.1193	-0.0445	0.5234	5.9522	-21.5649		49.656	-0.5436	4.1311	3.8877	-0.0588	0.243	1.3067	-0.9993	5.1829	-27.7348		49.656	-0.2701	0.8186	-0.707	0.0634	0.0661	0.0162	0.0793	0.503	-9.4066		49.641	-0.4003	2.6052	-0.707	-0.0797	0.8835
49.703	5.0825	4.9918	-0.46	2.6823	0.1417	-0.0421	-0.0476	4.2213	-23.6518		49.719	0.1987	1.6141	0.1184	-0.023	0.1588	-0.0421	-0.0476	5.6317	-19.6595		49.718	-0.5436	4.1441	3.9267	-0.0775	0.2447	1.3797	0.2062	6.401	-27.3718		49.719	-0.1789	0.8186	-0.681	0.0668	0.0627	0.0187	1.0945	-0.3945	-9.7695		49.703	-0.4134	2.6965	-0.7005	-0.0797	0.9042
49.765	5.0305	4.9657	-0.434	2.4796	0.0747	-0.0397	-0.6186	5.0547	-23.6518		49.781	0.2118	1.6923	0.1054	-0.0264	0.1588	-0.0324	-0.1111	5.9522	-21.0205		49.781	-0.5696	4.1441	3.9592	-0.0775	0.2378	1.3918	-0.6821	5.6317	-27.3718		49.781	-0.1268	0.8186	-0.6875	0.1332	0.1159	0.0284	-0.1111	0.3107	-9.951		49.766	-0.4134	2.7617	-0.7005	-0.0661	0.9763
49.828	4.9523	4.9787	-0.408	2.374	0.1193	-0.0348	-0.4283	4.7342	-23.561		49.844	0.2118	1.7445	0.1119	-0.0366	0.1554	-0.0421	0.0793	6.0163	-21.1112		49.843	-0.5827	4.1311	3.9917	-0.0724	0.2602	1.4599	-0.9993	5.0547	-26.4645		49.844	-0.0487	0.8186	-0.694	0.1656	0.073	0.0187	1.0945	-0.5227	-9.7695		49.828	-0.4134	2.853	-0.694	-0.0593	1.0278
49.89	4.8742	4.9918	-0.369	2.2257	0.097	-0.0445	-0.6186	5.3111	-24.1054		49.906	0.1987	1.8619	0.1054	-0.0366	0.2103	-0.0445	0.9041	6.2087	-20.7483		49.906	-0.5957	4.1311	4.0307	-0.0639	0.2447	1.4842	-0.6821	6.5292	-26.3738		49.906	0.0555	0.8316	-0.681	0.1809	0.0884	0.0357	0.7772	-0.4586	-10.4954		49.891	-0.4003	2.9182	-0.681	-0.0695	1.0381
49.953	4.8221	4.9787	-0.3495	2.0758	0.0901	-0.03	0.2696	5.3111	-22.9259		49.969	0.1987	1.9271	0.0859	-0.0025	0.279	-0.0324	0.5869	5.3753	-20.4761		49.968	-0.6087	4.1311	4.0827	-0.0673	0.2241	1.5449	-0.4283	5.7599	-26.646		49.969	0.1336	0.8055	-0.668	0.106	0.0815	0.0235	0.2062	0.503	-9.4066		49.953	-0.4003	3.0225	-0.681	-0.0797	1.0965
50.015	4.7309	4.9918	-0.3236	1.9651	0.1159	-0.0324	-0.3648	4.7983	-22.9259		50.031	0.1987	2.0053	0.0794	-0.0502	0.2928	-0.0397	0.7772	5.6958	-20.2039		50.031	-0.6087	4.1311	4.1152	-0.0877	0.2275	1.596	-0.809	5.6317	-26.646		50.031	0.2248	0.8186	-0.642	0.0889	0.0884	0.0405	0.5234	0.1825	-9.1344		50.016	-0.4003	3.0878	-0.668	-0.0933	1.0931
50.078	4.6658	4.9787	-0.2911	1.8476	0.1897	-0.0397	-0.1745	5.1188	-23.1074		50.094	0.2118	2.0836	0.0729	-0.0485	0.3391	-0.0275	0.3965	5.4394	-20.0224		50.093	-0.6217	4.1311	4.1607	-0.0775	0.2172	1.6543	-0.6186	5.9522	-26.7367		50.094	0.2899	0.8055	-0.6095	0.1622	0.1004	0.0114	0.5234	0.9518	-10.4954		50.078	-0.3613	3.166	-0.668	-0.0882	1.1429
50.14	4.5746	4.9918	-0.2716	1.6704	0.1279	-0.0397	-0.6186	4.7983	-23.3796		50.156	0.2118	2.1749	0.0859	-0.0434	0.3271	-0.0275	0.6503	5.824	-21.202		50.156	-0.6348	4.1311	4.1997	-0.0809	0.231	1.6932	-1.1262	5.3111	-28.1884		50.156	0.368	0.8186	-0.603	0.1792	0.0867	0.0065	1.2848	-0.0739	-9.7695		50.141	-0.3613	3.2442	-0.6615	-0.061	1.1978
50.203	4.4965	5.0048	-0.2391	1.5801	0.1983	-0.0251	0.0793	4.9906	-22.9259		50.219	0.1987	2.2401	0.0599	-0.0247	0.3288	-0.0445	-0.3014	5.6317	-20.6576		50.218	-0.6478	4.1311	4.2387	-0.0911	0.2035	1.7539	-0.6821	5.6317	-27.4626		50.219	0.4462	0.8186	-0.616	0.2269	0.1039	0.0138	0.46	-0.2663	-9.5881		50.203	-0.3482	3.3355	-0.655	-0.0967	1.2579
50.265	4.4444	4.9918	-0.2001	1.4642	0.1983	-0.0372	-0.238	5.1829	-23.1981		50.281	0.2118	2.3444	0.0599	-0.0417	0.3082	-0.0421	-0.3014	5.6317	-21.0205		50.281	-0.6608	4.1311	4.2712	-0.0945	0.1897	1.7952	-0.809	5.5035	-27.5533		50.281	0.5113	0.8186	-0.603	0.244	0.073	0.0162	1.6655	-0.5868	-10.6769		50.266	-0.3222	3.4007	-0.642	-0.1019	1.3489
50.328	4.3532	4.9918	-0.1806	1.3569	0.1829	-0.0518	-0.3014	5.1188	-23.561		50.344	0.1987	2.4226	0.0664	-0.0383	0.3529	-0.0275	0.2696	5.4394	-21.202		50.343	-0.6999	4.1311	4.3102	-0.0877	0.2035	1.8463	-0.0476	6.2728	-27.0996		50.344	0.6025	0.8186	-0.6095	0.2849	0.0901	0.0089	1.2214	0.503	-10.5861		50.328	-0.2962	3.479	-0.6355	-0.0814	1.397
50.39	4.249	4.9918	-0.1546	1.2939	0.2327	-0.0543	-0.3648	4.9265	-23.4703		50.406	0.1987	2.5009	0.0469	-0.04	0.3752	-0.0348	0.0158	5.5676	-20.4761		50.406	-0.6999	4.1311	4.3557	-0.1082	0.1691	1.907	-0.1111	5.5676	-26.4645		50.406	0.6936	0.8186	-0.5835	0.2508	0.1004	0.0284	0.2062	-0.0098	-11.4027		50.391	-0.231	3.5572	-0.629	-0.0627	1.4709
50.453	4.1839	4.9918	-0.1351	1.1951	0.2189	-0.0445	0.2696	5.4394	-22.9259		50.469	0.2118	2.5791	0.0404	-0.0519	0.3769	-0.0421	-0.3014	5.7599	-19.9317		50.468	-0.739	4.1311	4.3947	-0.0962	0.1777	1.9605	-0.5552	5.247	-27.0996		50.469	0.7848	0.8316	-0.5575	0.2082	0.0403	0.0357	1.031	0.3107	-11.2213		50.453	-0.192	3.6224	-0.6225	-0.0746	1.4314
50.515	4.1058	4.9787	-0.1156	1.0537	0.2344	-0.0421	-0.7455	5.5676	-22.7444		50.531	0.2118	2.6704	0.0209	-0.0468	0.4267	-0.0324	1.3483	5.5035	-21.4742		50.531	-0.739	4.1441	4.4336	-0.1235	0.164	1.9945	-0.1745	5.8881	-26.9182		50.531	0.8629	0.8186	-0.5315	0.2525	0.0884	0.0405	1.2848	-0.3304	-9.6788		50.516	-0.1399	3.7137	-0.616	-0.0865	1.5087
50.578	4.0276	4.9918	-0.0766	0.9702	0.267	-0.0348	-0.3014	6.2728	-22.9259		50.594	0.2118	2.7487	0.0014	-0.0434	0.4439	-0.03	0.1427	4.9265	-20.5668		50.593	-0.752	4.118	4.4856	-0.1116	0.176	2.0553	-0.3014	6.5292	-26.9182		50.594	0.9281	0.8186	-0.5315	0.3223	0.1004	0.0138	0.3331	0.2466	-10.3139		50.578	-0.1008	3.792	-0.59	-0.061	1.531
50.64	3.9625	4.9787	-0.0506	0.8782	0.2602	-0.0324	-0.1111	5.824	-23.2888		50.656	0.2118	2.8269	0.0079	-0.0519	0.4216	-0.0445	-0.1745	5.3753	-20.839		50.656	-0.739	4.1311	4.5246	-0.0877	0.1588	2.1379	-0.6186	5.824	-27.0089		50.656	1.0192	0.8316	-0.525	0.3155	0.073	-0.0008	0.6503	-0.0739	-10.4047		50.641	-0.0487	3.8833	-0.5835	-0.0678	1.5962
50.703	3.8844	4.9918	-0.0376	0.839	0.2893	-0.047	-0.6821	4.8624	-22.563		50.719	0.2248	2.9182	0.0079	-0.0639	0.4508	-0.0275	0.7138	5.5035	-21.1112		50.718	-0.752	4.1311	4.5636	-0.0894	0.1605	2.1865	-0.3014	5.3753	-26.3738		50.719	1.1104	0.8055	-0.512	0.3462	0.0867	0.0089	0.8407	-0.5227	-10.4047		50.703	-0.0096	3.9354	-0.5835	-0.0576	1.7439
50.765	3.8193	5.0048	-0.0181	0.7862	0.2739	-0.0251	-0.0476	5.247	-23.1981		50.781	0.2118	3.0095	-0.0051	-0.0639	0.4439	-0.0348	-0.0476	5.5035	-20.5668		50.781	-0.7259	4.1311	4.5961	-0.0945	0.1485	2.2594	-0.4283	5.8881	-26.283		50.781	1.2015	0.8186	-0.5055	0.3683	0.0541	0.0211	1.0945	-0.5227	-10.7676		50.766	0.0164	4.0137	-0.577	-0.0473	1.8401
50.828	3.7281	4.9918	0.0014	0.7027	0.3237	-0.0372	-0.3648	4.7983	-22.9259		50.844	0.2118	3.0878	-0.0181	-0.0502	0.4645	-0.0202	1.031	5.5676	-21.202		50.843	-0.765	4.1311	4.6221	-0.0877	0.1382	2.3056	-0.7455	6.2087	-25.8294		50.844	1.2667	0.8316	-0.4925	0.3837	0.073	0.0235	1.5386	-0.4586	-10.4954		50.828	0.0425	4.0919	-0.5705	-0.0354	1.8933
50.89	3.663	4.9918	0.0209	0.667	0.3117	-0.0397	-0.6186	4.9265	-23.7425		50.906	0.2118	3.166	-0.0246	-0.0179	0.5315	-0.0275	1.031	5.3111	-21.2927		50.906	-0.765	4.1441	4.6741	-0.0979	0.1348	2.3737	-0.809	5.7599	-26.1016		50.906	1.3448	0.8577	-0.473	0.4314	0.0627	0.0211	0.0158	0.0543	-10.8583		50.891	0.0685	4.1832	-0.564	-0.0303	1.9534
50.953	3.5848	4.9918	0.0404	0.5222	0.2653	-0.0348	-0.7455	5.5676	-22.2		50.969	0.2118	3.2442	-0.0376	-0.0468	0.516	-0.03	0.5869	5.8881	-21.0205		50.968	-0.791	4.1441	4.7131	-0.1133	0.1331	2.4271	-0.6186	6.0804	-26.3738		50.969	1.4099	0.8577	-0.473	0.4501	0.0644	0.0259	1.1579	-0.0739	-10.9491		50.953	0.0685	4.2615	-0.551	-0.0405	1.9706
51.015	3.5197	4.9918	0.0469	0.4608	0.3203	-0.0275	-0.5552	5.7599	-22.4722		51.031	0.1987	3.3095	-0.0311	-0.0434	0.5023	-0.0324	0.0793	5.3753	-20.6576		51.031	-0.8431	4.1441	4.7521	-0.1269	0.1296	2.4976	0.0793	5.7599	-26.9182		51.031	1.4881	0.8707	-0.46	0.52	0.097	0.0259	0.9676	-0.7791	-10.6769		51.016	0.0946	4.3528	-0.5445	-0.015	2.0754
51.078	3.4286	4.9918	0.0859	0.3961	0.3512	-0.0421	-1.1897	5.7599	-22.8352		51.094	0.2118	3.4007	-0.0376	-0.0434	0.4989	-0.0445	1.031	5.824	-20.4761		51.093	-0.8301	4.118	4.7911	-0.1184	0.121	2.5316	-0.0476	5.6317	-27.0996		51.094	1.5662	0.8838	-0.4405	0.5319	0.0884	0.0138	0.7772	-0.4586	-10.1325		51.078	0.0815	4.3919	-0.5445	-0.0286	2.1818
51.14	3.3504	5.0048	0.0924	0.345	0.3203	-0.0445	-1.1897	5.8881	-23.0166		51.156	0.2248	3.479	-0.0376	-0.0383	0.5418	-0.0421	1.3483	5.247	-21.202		51.156	-0.8562	4.1441	4.8301	-0.1405	0.1228	2.5973	-0.6186	5.4394	-26.1923		51.156	1.6443	0.8968	-0.4275	0.5642	0.0627	0.0357	1.031	-1.0997	-11.312		51.141	0.0946	4.4701	-0.538	-0.0916	2.3622
51.203	3.2723	4.9918	0.1054	0.3501	0.346	-0.0372	-0.8724	5.3111	-22.0186		51.219	0.2118	3.5703	-0.0636	-0.0383	0.559	-0.0494	1.2848	5.5676	-21.4742		51.218	-0.8692	4.1441	4.8756	-0.1712	0.1159	2.6532	0.3965	5.4394	-26.5552		51.219	1.7225	0.9229	-0.421	0.5779	0.0798	0.0259	0.8407	-0.0098	-10.7676		51.203	0.1076	4.5614	-0.5445	-0.0473	2.4446
51.265	3.1941	4.9918	0.0989	0.3211	0.3409	-0.0275	-0.9993	4.8624	-22.2		51.281	0.2118	3.6355	-0.0636	-0.0315	0.5761	-0.0397	1.0945	5.247	-20.7483		51.281	-0.8952	4.1311	4.9146	-0.1507	0.1125	2.7212	0.3331	5.1188	-26.5552		51.281	1.8006	0.9359	-0.395	0.6562	0.1176	0.0041	0.9676	-0.2663	-12.1286		51.266	0.0946	4.6397	-0.538	-0.0456	2.5116
51.328	3.103	4.9918	0.1054	0.2581	0.3048	-0.0494	-1.5704	4.9906	-22.563		51.344	0.2118	3.7137	-0.0701	-0.0605	0.5538	-0.0324	1.031	5.5676	-22.1093		51.343	-0.9213	4.1311	4.9666	-0.1797	0.0936	2.7577	-0.8724	5.1829	-26.9182		51.344	1.8918	0.949	-0.382	0.6562	0.0627	0.0405	1.3483	-0.2663	-11.4935		51.328	0.0946	4.7049	-0.525	-0.0218	2.5665
51.39	3.0379	5.0048	0.1249	0.2121	0.3477	-0.0227	-0.5552	5.3753	-23.1074		51.406	0.2118	3.8181	-0.0766	-0.0605	0.5641	-0.0421	-0.3014	5.1188	-22.563		51.406	-0.9213	4.1311	4.9925	-0.1644	0.0678	2.8233	-0.4917	5.4394	-26.5552		51.406	1.9569	0.962	-0.382	0.7108	0.0798	-0.0008	0.6503	-0.715	-10.9491		51.391	0.1076	4.7962	-0.5315	-0.0354	2.7073
51.453	2.9597	5.0048	0.1444	0.0861	0.3443	-0.0251	-0.809	6.0163	-23.3796		51.469	0.2248	3.9094	-0.0831	-0.0485	0.5521	-0.0397	0.9041	5.1829	-23.0166		51.468	-0.9343	4.1441	5.0315	-0.1848	0.0678	2.9084	0.3965	5.4394	-27.0089		51.469	2.0481	0.9751	-0.3495	0.7346	0.0661	-0.0032	0.0158	-0.0739	-11.312		51.453	0.1206	4.8744	-0.5185	-0.032	2.8379
51.515	2.8686	4.9918	0.1769	0.0554	0.3031	-0.0421	-2.0145	6.3369	-22.9259		51.531	0.2248	3.9615	-0.0896	-0.0451	0.5796	-0.0275	1.6655	5.5676	-22.7444		51.531	-0.9473	4.1311	5.0835	-0.1507	0.0781	2.974	-0.6821	5.6317	-25.8294		51.531	2.1132	0.9751	-0.3495	0.7568	0.0541	0.0211	1.6655	-0.4586	-12.0379		51.516	0.0946	4.9527	-0.525	-0.0388	3.013
51.578	2.7644	4.9657	0.1769	0.0486	0.3374	-0.0397	-0.8724	5.6958	-22.3815		51.594	0.2248	4.0398	-0.0896	-0.0417	0.5624	-0.0227	1.7924	5.4394	-23.6518		51.593	-0.9603	4.118	5.1225	-0.1627	0.0867	3.0445	0.3331	5.7599	-26.3738		51.594	2.1913	0.9881	-0.3366	0.8215	0.0919	0.0211	0.5869	-0.7791	-12.4915		51.578	0.1076	5.0179	-0.5185	-0.0303	3.1006
51.64	2.6992	4.9527	0.1639	0.0826	0.31	-0.047	-2.2683	5.0547	-22.7444		51.656	0.2378	4.1441	-0.0961	-0.0366	0.5607	-0.0348	0.2696	5.824	-23.1981		51.656	-0.9473	4.1311	5.1615	-0.1797	0.0695	3.1149	0.2696	5.6958	-25.8294		51.656	2.2564	1.0011	-0.3366	0.8624	0.0712	0.0381	1.4752	-0.3945	-12.673		51.641	0.1076	5.0961	-0.512	-0.0303	3.2792
51.703	2.6211	4.9266	0.1444	0.069	0.31	-0.0324	-1.6973	5.3753	-23.1074		51.719	0.2248	4.2093	-0.1156	-0.0247	0.5796	-0.0348	0.9676	5.247	-23.7425		51.718	-0.9473	4.1571	5.194	-0.1695	0.0695	3.1854	-0.3648	5.6958	-25.8294		51.719	2.3476	1.0142	-0.3301	0.9373	0.085	0.0114	1.5386	-0.4586	-13.2174		51.703	0.1206	5.1874	-0.5185	-0.0337	3.372
51.765	2.543	4.8874	0.1314	0.0196	0.3598	-0.047	-1.3166	5.6317	-21.9278		51.781	0.2248	4.2875	-0.1286	-0.0298	0.6294	-0.0227	0.7772	5.1829	-24.1054		51.781	-0.9603	4.118	5.233	-0.1763	0.0524	3.268	0.5869	5.247	-25.7386		51.781	2.4388	1.0142	-0.3171	0.9884	0.1125	0.0138	1.031	-0.715	-13.4896		51.766	0.0946	5.2656	-0.512	-0.0286	3.5076
51.828	2.4648	4.8483	0.1314	-0.0128	0.3203	-0.0324	-0.8724	5.6958	-22.6537		51.844	0.2248	4.3788	-0.1221	-0.0298	0.595	-0.0445	0.7138	5.1188	-24.1054		51.843	-0.9734	4.1311	5.2785	-0.2019	0.0541	3.3264	-0.238	5.3111	-26.1923		51.844	2.4778	1.0272	-0.3106	0.985	0.0884	-0.0008	1.3483	-0.7791	-14.7599		51.828	0.1076	5.3308	-0.512	-0.0542	3.6708
51.89	2.3737	4.7962	0.1574	-0.0383	0.3254	-0.0421	-0.9993	5.824	-22.2908		51.906	0.2508	4.4701	-0.1351	-0.0264	0.6225	-0.0372	0.6503	5.4394	-24.4684		51.906	-1.0124	4.1441	5.3175	-0.2087	0.0335	3.3823	0.1427	5.824	-26.283		51.906	2.582	1.0403	-0.3041	1.06	0.109	0.0114	1.1579	-0.4586	-13.7618		51.891	0.0946	5.3961	-0.499	-0.0422	3.8511
51.953	2.2955	4.757	0.1509	-0.0383	0.3048	-0.0421	-2.7125	5.8881	-21.9278		51.969	0.2378	4.5484	-0.1416	-0.0519	0.5761	-0.0421	0.9041	5.824	-25.1942		51.968	-1.0255	4.1441	5.3565	-0.1899	0.0214	3.46	-0.0476	5.1188	-25.4664		51.969	2.6472	1.0533	-0.2846	1.1009	0.0987	0.0162	0.46	-0.2663	-13.7618		51.953	0.1206	5.4873	-0.499	-0.0252	3.961
52.015	2.2174	4.7309	0.1249	-0.0059	0.3134	-0.0251	-1.6338	4.9265	-23.0166		52.031	0.2378	4.6266	-0.1481	-0.0315	0.6139	-0.0445	0.3331	4.606	-25.285		52.031	-1.0385	4.1441	5.402	-0.2155	0.0163	3.5232	-0.1111	5.6958	-26.1923		52.031	2.7383	1.0403	-0.2846	1.1707	0.0524	0.0259	1.4117	-0.3304	-15.3043		52.016	0.0815	5.5656	-0.4925	0.0004	4.1241
52.078	2.1132	4.6788	0.0989	-0.0179	0.3357	-0.03	-0.1745	5.1188	-23.1981		52.094	0.2378	4.7049	-0.1546	-0.0298	0.65	-0.0397	1.3483	4.8624	-25.1942		52.093	-1.0385	4.1441	5.4345	-0.2172	0.0008	3.5767	-0.3648	5.6958	-25.1942		52.094	2.8295	1.0533	-0.2716	1.2542	0.1228	0.0089	1.2848	-0.9714	-14.8506		52.078	0.0946	5.6178	-0.486	-0.0303	4.3096
52.14	2.0611	4.6527	0.0794	-0.0162	0.334	-0.0348	-2.4587	4.9906	-22.2		52.156	0.2508	4.7831	-0.1741	-0.0485	0.6311	-0.0397	0.2696	5.3111	-25.8294		52.156	-1.0515	4.1311	5.4735	-0.241	0.0043	3.6764	0.2062	5.8881	-26.5552		52.156	2.8946	1.0664	-0.2651	1.2934	0.0695	0.0284	0.9041	-0.715	-15.5765		52.141	0.1076	5.7221	-0.4925	-0.0559	4.5277
52.203	1.9569	4.6397	0.0794	-0.0622	0.3254	-0.0275	-1.5069	5.4394	-22.6537		52.219	0.2508	4.8614	-0.1871	-0.0332	0.6637	-0.0397	0.9676	4.9906	-26.4645		52.218	-1.0776	4.1441	5.4995	-0.2376	0.0146	3.7711	-0.1745	4.9906	-25.9201		52.219	2.9727	1.0533	-0.2586	1.3973	0.0815	0.0211	0.9676	-0.9073	-16.3023		52.203	0.1076	5.7873	-0.4925	-0.0252	4.751
52.265	1.9048	4.6266	0.1054	-0.0996	0.3254	-0.0421	-1.5069	6.2087	-22.2		52.281	0.2508	4.9396	-0.1806	-0.0179	0.6929	-0.0324	1.1579	5.0547	-26.1016		52.281	-1.0645	4.1441	5.5515	-0.2189	0.0129	3.8343	-0.0476	5.3753	-25.8294		52.281	3.0248	1.0533	-0.2586	1.4637	0.0867	0.0138	1.6021	-0.7791	-16.9375		52.266	0.0946	5.8525	-0.486	-0.0354	4.8437
52.328	1.8137	4.5875	0.1249	-0.1065	0.3082	-0.0324	-2.5856	6.1446	-22.8352		52.344	0.2639	5.0309	-0.1871	-0.0298	0.7152	-0.0275	1.6655	5.0547	-26.3738		52.343	-1.1036	4.1311	5.5969	-0.2393	-0.0009	3.8951	-0.6186	4.9265	-26.283		52.344	3.116	1.0533	-0.2521	1.5285	0.0661	0.0016	0.8407	-1.0355	-17.3912		52.328	0.0946	5.9438	-0.486	-0.0439	5
52.39	1.7355	4.5745	0.1314	-0.1133	0.3391	-0.0227	-0.238	5.5676	-23.2888		52.406	0.2508	5.0961	-0.2066	-0.0383	0.7101	-0.0421	1.8559	5.1188	-27.4626		52.406	-1.0906	4.1441	5.6294	-0.2223	0.006	3.9704	-0.238	5.3111	-26.1016		52.406	3.2072	1.0533	-0.2456	1.566	0.0661	0.0114	1.4752	-1.292	-17.4819		52.391	0.1076	6.022	-0.486	-0.0116	5.2318
52.453	1.6313	4.5484	0.1184	-0.0707	0.3443	-0.0445	-1.4435	5.5035	-22.9259		52.469	0.2508	5.2004	-0.2131	-0.04	0.729	-0.0275	1.5386	5.1829	-26.3738		52.468	-1.1036	4.1441	5.6684	-0.2444	-0.0198	4.0555	0.0158	4.7983	-26.283		52.469	3.2983	1.0664	-0.2391	1.6188	0.0953	0.0211	1.2214	-1.4202	-17.9356		52.453	0.0946	6.1133	-0.4795	-0.0405	5.4259
52.515	1.5662	4.5092	0.0859	-0.0639	0.2962	-0.0202	-1.7607	5.824	-22.4722		52.531	0.2378	5.2656	-0.2131	-0.04	0.6946	-0.0227	1.9193	5.0547	-27.644		52.531	-1.1297	4.1311	5.7074	-0.2564	-0.0181	4.1065	-0.1111	5.824	-26.1923		52.531	3.3634	1.0664	-0.2326	1.7227	0.0386	-0.0129	0.5869	-1.1638	-19.0244		52.516	0.0946	6.1785	-0.486	-0.0167	5.6011
52.578	1.4881	4.5092	0.0664	-0.0877	0.3203	-0.0421	-1.4435	5.7599	-22.9259		52.594	0.2378	5.3439	-0.2261	-0.04	0.6809	-0.0227	0.7138	5.247	-27.9162		52.593	-1.1297	4.1441	5.7464	-0.2496	-0.0181	4.2183	-0.238	5.824	-25.5572		52.594	3.4286	1.0533	-0.2326	1.7346	0.0919	0.0114	1.0945	-0.5227	-18.0263		52.578	0.1076	6.2437	-0.473	-0.0235	5.8071
52.64	1.4099	4.4701	0.0729	-0.1048	0.3237	-0.0494	-1.7607	5.824	-22.8352		52.656	0.2639	5.4091	-0.2261	-0.0383	0.6757	-0.03	1.2848	5.5676	-28.1884		52.656	-1.1557	4.1311	5.7854	-0.2581	-0.0198	4.2888	0.0158	5.4394	-25.3757		52.656	3.4937	1.0533	-0.2196	1.8266	0.0815	0.0089	1.0945	-0.6509	-19.2058		52.641	0.0815	6.3089	-0.4795	-0.049	5.9668
52.703	1.3318	4.4701	0.0859	-0.1525	0.3031	-0.0251	-1.6973	6.2728	-23.1074		52.719	0.2508	5.5265	-0.2261	-0.0264	0.6946	-0.0324	1.4117	4.1572	-28.0977		52.718	-1.1687	4.1311	5.8244	-0.2444	-0.0095	4.3641	-0.4283	5.247	-25.9201		52.719	3.5848	1.0533	-0.2196	1.922	0.0884	0.0284	1.7924	-0.8432	-19.5688		52.703	0.0946	6.3872	-0.473	-0.0184	6.2038
52.765	1.2536	4.4701	0.1054	-0.2002	0.3306	-0.0251	-0.6186	6.0804	-22.7444		52.781	0.2639	5.5656	-0.2391	-0.0536	0.7324	-0.0397	1.5386	5.4394	-29.1865		52.781	-1.1557	4.1441	5.8634	-0.2904	-0.0043	4.4273	-0.1111	5.4394	-25.7386		52.781	3.663	1.0533	-0.2196	2.0276	0.0644	-0.0008	0.8407	-1.1638	-18.5707		52.766	0.0946	6.4654	-0.473	-0.0065	6.367
52.828	1.1625	4.444	0.1119	-0.1371	0.2979	-0.0348	-2.2049	6.6574	-22.9259		52.844	0.2508	5.696	-0.2521	-0.0519	0.8097	-0.0494	1.4117	5.1829	-28.0977		52.843	-1.1687	4.1441	5.8959	-0.2956	-0.0301	4.5245	0.2062	5.7599	-25.5572		52.844	3.7281	1.0533	-0.2196	2.1026	0.0266	-0.0105	0.9041	-1.3561	-20.6576		52.828	0.0946	6.5437	-0.4665	-0.0303	6.6246
52.89	1.0713	4.4571	0.0729	-0.1082	0.3134	-0.0202	-1.1262	5.6958	-23.3796		52.906	0.2639	5.7482	-0.2521	-0.0536	0.7942	-0.0348	2.4904	5.3753	-29.6402		52.906	-1.1687	4.1311	5.9349	-0.287	-0.0284	4.5926	0.1427	6.0804	-26.3738		52.906	3.8062	1.0533	-0.2196	2.2065	0.0558	0.0089	1.6655	-1.0997	-21.5649		52.891	0.1076	6.6219	-0.473	-0.0184	6.7877
52.953	0.9932	4.444	0.0274	-0.0775	0.31	-0.0348	-1.2531	5.5676	-23.6518		52.969	0.2639	5.8655	-0.2651	-0.0179	0.7685	-0.0275	2.0462	4.9265	-30.3661		52.968	-1.1687	4.1441	5.9804	-0.3109	-0.0181	4.6679	0.7138	6.0163	-26.646		52.969	3.8974	1.0533	-0.2066	2.2815	0.1039	0.0016	0.7772	-1.3561	-21.0205		52.953	0.1076	6.7132	-0.4665	-0.0303	6.999
53.015	0.915	4.4571	0.0014	-0.1048	0.3168	-0.0324	-2.1414	5.3111	-22.8352		53.031	0.2639	5.9177	-0.2716	-0.0502	0.7668	-0.0348	1.9828	4.9906	-30.5475		53.031	-1.1817	4.1441	6.0064	-0.287	-0.0215	4.7724	0.3331	6.2728	-25.7386		53.031	3.9625	1.0533	-0.2001	2.3666	0.0936	0.0284	0.9676	-0.9073	-21.3834		53.016	0.0946	6.7654	-0.4665	-0.0201	7.1501
53.078	0.8369	4.4571	0.0014	-0.1388	0.3134	-0.0348	-0.6821	5.7599	-24.1054		53.094	0.2769	6.022	-0.2716	-0.0332	0.7805	-0.0372	0.9676	5.1188	-30.3661		53.093	-1.2078	4.1441	6.0454	-0.2904	-0.0387	4.787	0.3965	5.824	-26.4645		53.094	4.0276	1.0403	-0.1936	2.4518	0.121	0.0211	1.4117	-1.4843	-20.6576		53.078	0.0946	6.8567	-0.473	-0.0439	7.4283
53.14	0.7457	4.4571	0.0274	-0.2053	0.3288	-0.047	-1.2531	6.3369	-23.8332		53.156	0.2639	6.1133	-0.2716	-0.0349	0.8406	-0.047	1.3483	4.7342	-30.1846		53.156	-1.2078	4.1441	6.0844	-0.3109	-0.0284	4.928	1.0945	5.3753	-26.283		53.156	4.1058	1.0272	-0.1936	2.5642	0.1142	0.0016	1.1579	-1.4843	-21.202		53.141	0.0946	6.948	-0.4795	-0.049	7.643
53.203	0.6415	4.4571	0.0469	-0.1661	0.3065	-0.0397	-2.2683	5.824	-23.8332		53.219	0.2899	6.1785	-0.2651	-0.0264	0.8629	-0.0251	1.729	5.247	-30.8197		53.218	-1.2208	4.1311	6.1169	-0.3398	-0.0129	4.9839	0.2696	5.1829	-26.7367		53.219	4.1839	1.0403	-0.1871	2.6375	0.0506	-0.0008	0.5869	-1.4202	-22.1093		53.203	0.1076	7.0001	-0.4795	-0.0371	7.7271
53.265	0.5764	4.4571	0.0469	-0.1388	0.3237	-0.0421	-1.4435	5.5035	-23.8332		53.281	0.2899	6.2568	-0.2846	-0.0332	0.9076	-0.0397	2.6173	5.1188	-30.1846		53.281	-1.2208	4.1311	6.1494	-0.3262	-0.0129	5.0835	0.2696	5.0547	-26.0108		53.281	4.2621	1.0403	-0.1936	2.7823	0.152	-0.0032	0.5869	-1.9331	-21.2927		53.266	0.1076	7.0393	-0.4795	-0.061	7.5794
53.328	0.4983	4.4571	0.0014	-0.0996	0.3254	-0.047	-1.2531	5.824	-24.5591		53.344	0.2769	6.322	-0.2846	-0.0383	0.9162	-0.0445	2.0462	6.0804	-30.9105		53.343	-1.2469	4.1441	6.2013	-0.316	-0.006	5.171	0.7138	4.7342	-27.0089		53.344	4.3532	1.0533	-0.1871	2.8726	0.1537	-0.0057	0.3331	-1.5484	-21.5649		53.328	0.0946	7.0393	-0.4665	-0.0405	7.1467
53.39	0.4332	4.431	-0.0181	-0.103	0.3082	-0.0372	-1.7607	5.0547	-24.4684		53.406	0.2769	6.4133	-0.2846	-0.0298	0.8904	-0.0348	1.5386	4.7983	-30.1846		53.406	-1.2338	4.1571	6.2468	-0.3313	-0.0078	5.2342	0.5234	5.6958	-27.0089		53.406	4.4314	1.0403	-0.1871	2.9152	0.1142	0.0089	0.46	-1.5484	-23.0166		53.391	0.0946	7.0001	-0.447	-0.0473	6.7414
53.453	0.329	4.4571	-0.0311	-0.2002	0.334	-0.0275	-0.6821	5.5035	-25.1942		53.469	0.2639	6.4915	-0.2781	-0.0485	0.8956	-0.0348	1.729	5.5035	-31.1827		53.468	-1.2469	4.1963	6.2793	-0.3364	-0.0163	5.3071	0.7138	5.7599	-26.4645		53.469	4.5095	1.0272	-0.1806	3.0327	0.1331	0.0162	0.6503	-0.9714	-22.2		53.453	0.0946	6.9219	-0.434	0.0021	6.7225
53.515	0.2639	4.4701	0.0014	-0.2223	0.3185	-0.0372	-1.0628	6.2728	-25.0128		53.531	0.2899	6.5698	-0.2846	-0.0332	0.9488	-0.0251	2.3	5.0547	-30.8197		53.531	-1.2338	4.1963	6.3183	-0.3398	-0.0095	5.3776	1.2214	5.5035	-27.0089		53.531	4.5877	1.0142	-0.1871	3.1673	0.1382	-0.0057	0.5869	-1.292	-21.8371		53.516	0.1206	6.8436	-0.4535	-0.0405	6.1609
53.578	0.1727	4.444	0.0274	-0.2036	0.334	-0.0445	-1.38	7.1062	-25.4664		53.594	0.2899	6.648	-0.2846	-0.0485	1.0089	-0.0372	2.4269	5.1829	-30.6383		53.593	-1.2338	4.2223	6.3703	-0.3398	0.0008	5.4627	0.0793	5.1188	-26.7367		53.594	4.6528	0.9881	-0.1806	3.3087	0.1331	0.0041	0.46	-1.8048	-21.2927		53.578	0.0946	6.7654	-0.473	-0.003	5.8655
53.64	0.0815	4.4571	0.0339	-0.1899	0.3409	-0.0324	-0.0476	5.8881	-25.7386		53.656	0.2769	6.7132	-0.2846	-0.0519	1.0776	-0.0348	2.6807	5.4394	-31.2734		53.656	-1.2599	4.2223	6.4093	-0.3535	0.0008	5.5599	0.9676	5.247	-27.2811		53.656	4.7309	0.9881	-0.1806	3.3905	0.1777	-0.0057	0.1427	-2.1254	-21.9278		53.641	0.1076	6.7002	-0.46	-0.0525	5.6371
53.703	0.0034	4.4571	0.0144	-0.1337	0.3014	-0.0324	-1.6338	5.824	-25.1942		53.719	0.2899	6.8176	-0.2976	-0.0332	1.0759	-0.0421	2.6807	5.0547	-30.9105		53.718	-1.2729	4.2484	6.4418	-0.3467	0.0008	5.6377	0.3331	5.6317	-27.0089		53.719	4.8091	0.962	-0.1871	3.4893	0.0815	-0.0057	-0.1111	-1.7407	-23.2888		53.703	0.0946	6.6219	-0.4405	-0.0661	5.1391
53.765	-0.0878	4.4571	-0.0441	-0.1218	0.3134	-0.0227	-1.1262	5.0547	-25.8294		53.781	0.2899	6.9219	-0.2846	-0.0434	1.0244	-0.0445	1.9193	5.6958	-31.9993		53.781	-1.2729	4.2615	6.4873	-0.3398	-0.0026	5.696	0.9041	5.4394	-27.4626		53.781	4.9002	0.949	-0.1806	3.5813	0.1812	0.0041	0.7138	-1.4202	-22.1093		53.766	0.0946	6.5437	-0.434	-0.0218	4.9536
53.828	-0.1529	4.431	-0.0701	-0.1678	0.3357	-0.0275	-0.9993	4.9265	-26.0108		53.844	0.2769	6.9871	-0.2976	-0.0213	1.002	-0.0251	2.1097	4.9906	-31.4549		53.843	-1.299	4.2615	6.5133	-0.4046	0.0214	5.8078	0.5869	5.5035	-27.644		53.844	4.9523	0.9359	-0.1676	3.7039	0.1331	0.0187	0.6503	-1.869	-21.9278		53.828	0.1076	6.4785	-0.447	-0.0013	4.7716
53.89	-0.231	4.4571	-0.0766	-0.2121	0.3014	-0.0251	-1.6338	5.9522	-25.285		53.906	0.2769	7.0653	-0.2976	-0.0502	1.0209	-0.0421	1.5386	5.4394	-31.0919		53.906	-1.312	4.2745	6.5588	-0.3995	0.0026	5.8904	0.7772	4.7983	-27.1904		53.906	5.0435	0.8968	-0.1806	3.859	0.0867	0.0041	0.2062	-1.6766	-22.4722		53.891	0.0946	6.4002	-0.4535	-0.0473	4.5466
53.953	-0.3092	4.4571	-0.0246	-0.2887	0.3374	-0.0372	-0.238	6.1446	-26.7367		53.969	0.2769	7.1305	-0.2911	-0.0485	1.1119	-0.03	2.0462	5.0547	-31.3641		53.968	-1.325	4.2875	6.6043	-0.4029	-0.0009	5.9925	0.7138	5.3753	-27.7348		53.969	5.1216	0.8707	-0.1741	3.9407	0.176	-0.0202	0.5869	-1.9331	-23.0166		53.953	0.1076	6.3089	-0.4405	-0.0439	4.2169
54.015	-0.4003	4.444	0.0079	-0.2887	0.3271	-0.0348	-1.3166	6.5292	-27.3718		54.031	0.2899	7.2218	-0.2911	-0.0298	1.227	-0.0372	2.998	4.8624	-31.5456		54.031	-1.338	4.2875	6.6368	-0.4182	-0.0026	6.0776	1.1579	5.3111	-28.0977		54.031	5.1867	0.8577	-0.1741	4.0276	0.1296	0.0065	-0.0476	-2.0613	-22.4722		54.016	0.1076	6.2437	-0.4535	-0.0422	3.9644
54.078	-0.4915	4.4701	0.0209	-0.2751	0.3203	-0.0251	-0.8724	6.4651	-27.0089		54.094	0.2769	7.3001	-0.2911	-0.0383	1.2734	-0.03	3.8863	5.3753	-32.3622		54.093	-1.3641	4.2745	6.6758	-0.4097	-0.0112	6.1213	0.8407	4.9906	-27.1904		54.094	5.2649	0.8316	-0.1741	4.1264	0.1674	0.0089	0.7138	-1.6766	-22.2		54.078	0.1076	6.1785	-0.447	-0.0354	3.6553
54.14	-0.5696	4.444	-0.0051	-0.2325	0.3151	-0.0251	-1.0628	5.247	-27.1904		54.156	0.2769	7.3783	-0.2911	-0.0213	1.294	-0.0324	3.1249	4.9906	-32.2715		54.156	-1.338	4.2745	6.7083	-0.4182	-0.0095	6.2428	0.7138	5.6317	-27.5533		54.156	5.343	0.8055	-0.1741	4.2917	0.1657	0.0114	0.1427	-2.1254	-22.0186		54.141	0.0946	6.1264	-0.434	-0.0456	3.5798
54.203	-0.6478	4.4571	-0.0701	-0.1712	0.2945	-0.0178	-1.38	5.0547	-27.9162		54.219	0.2899	7.4696	-0.3041	-0.0162	1.2854	-0.0372	2.7442	5.1188	-32.9066		54.218	-1.338	4.2875	6.7603	-0.4182	0.0111	6.3352	0.3331	4.8624	-26.7367		54.219	5.4212	0.7925	-0.1806	4.3973	0.1382	0.0235	0.2062	-2.1895	-23.0166		54.203	0.0815	6.0351	-0.447	-0.0252	3.4492
54.265	-0.7259	4.4701	-0.1091	-0.2019	0.2911	-0.0397	-1.2531	5.5676	-27.644		54.281	0.2899	7.5609	-0.2911	-0.0145	1.3009	-0.03	2.2366	5.6317	-33.0881		54.281	-1.338	4.2875	6.7927	-0.4131	-0.0009	6.4275	0.3331	5.247	-26.8274		54.281	5.4863	0.7794	-0.1806	4.5302	0.1657	-0.0105	0.3965	-1.869	-22.6537		54.266	0.1076	5.9438	-0.46	-0.0678	3.2998
54.328	-0.8041	4.444	-0.1156	-0.2257	0.2876	-0.0348	-2.078	5.8881	-27.7348		54.344	0.2769	7.6392	-0.2911	-0.0042	1.2974	-0.0421	2.0462	5.3111	-31.8178		54.343	-1.3641	4.3006	6.8252	-0.4369	-0.0009	6.4883	1.0945	6.0163	-27.7348		54.344	5.5384	0.7534	-0.1806	4.6716	0.1812	0.0089	0.1427	-2.8947	-23.1074		54.328	0.0946	5.8655	-0.4405	-0.049	3.0062
54.39	-0.8822	4.4571	-0.0961	-0.3194	0.2962	-0.03	-0.4283	6.5292	-28.007		54.406	0.2769	7.7304	-0.2911	-0.0145	1.4176	-0.0397	2.1731	5.1829	-32.6344		54.406	-1.3641	4.3136	6.8707	-0.4335	0.0197	6.5661	1.1579	5.1829	-28.2792		54.406	5.6426	0.7403	-0.1676	4.7942	0.0919	-0.0032	0.46	-2.1895	-23.2888		54.391	0.0946	5.7873	-0.447	-0.0099	2.8465
54.453	-0.9734	4.431	-0.0636	-0.3552	0.2945	-0.0494	-1.38	6.7215	-28.2792		54.469	0.2899	7.7956	-0.2846	0.0077	1.5258	-0.0445	2.9345	5.4394	-32.7251		54.468	-1.3771	4.3136	6.9032	-0.4404	0.006	6.6973	1.4117	5.6958	-28.4606		54.469	5.6946	0.7142	-0.1676	4.8862	0.1571	-0.0105	1.031	-2.7665	-23.4703		54.453	0.0946	5.7221	-0.4665	-0.0439	2.6782
54.515	-1.0515	4.4571	-0.0441	-0.3944	0.2928	-0.0348	-1.1897	6.2728	-29.2773		54.531	0.2769	7.8869	-0.2911	-0.0145	1.5688	-0.0348	2.998	5.247	-33.1788		54.531	-1.3901	4.3006	6.9487	-0.4335	-0.0078	6.741	1.1579	5.6958	-27.8255		54.531	5.7728	0.7012	-0.1741	5.06	0.1434	-0.0081	-0.3648	-2.51	-23.2888		54.516	0.1076	5.6308	-0.4535	-0.0439	2.5889
54.578	-1.1166	4.4701	-0.0506	-0.333	0.279	-0.0251	-0.9993	5.5676	-29.368		54.594	0.2769	7.9782	-0.2911	-0.0128	1.6014	-0.0324	2.4904	4.9906	-33.6325		54.593	-1.3901	4.3006	6.9812	-0.4301	-0.0078	6.8455	0.8407	5.247	-27.2811		54.594	5.8509	0.6751	-0.1741	5.2201	0.0747	0.0041	0.5234	-2.8947	-23.6518		54.578	0.0946	5.5525	-0.4535	-0.061	2.4377
54.64	-1.2078	4.4571	-0.0766	-0.3364	0.2756	-0.0372	-1.0628	5.247	-29.1865		54.656	0.2899	8.0565	-0.2846	-0.0451	1.6306	-0.0421	1.7924	5.824	-33.6325		54.656	-1.3901	4.3397	7.0202	-0.4608	-0.0112	6.9282	1.0945	5.3753	-28.3699		54.656	5.916	0.649	-0.1676	5.3121	0.1537	0.0089	-0.0476	-2.1895	-22.7444		54.641	0.0946	5.4743	-0.4665	-0.0456	2.3295
54.703	-1.312	4.444	-0.0961	-0.333	0.2344	-0.0348	-1.0628	5.6317	-29.8217		54.719	0.2899	8.1347	-0.2911	-0.0145	1.6512	-0.0397	1.9193	5.5676	-32.6344		54.718	-1.4162	4.3267	7.0592	-0.4744	-0.0181	7.0424	1.2848	5.6958	-27.644		54.719	6.0202	0.649	-0.1806	5.5029	0.1812	0.0211	0.7772	-2.3818	-23.7425		54.703	0.1076	5.3961	-0.473	-0.0456	2.12
54.765	-1.3901	4.4571	-0.0961	-0.4046	0.2584	-0.0348	-0.5552	6.5292	-29.4587		54.781	0.3029	8.1999	-0.2911	-0.0298	1.7422	-0.0421	2.9345	4.7983	-33.5417		54.781	-1.4031	4.3528	7.1047	-0.4693	0.0249	7.1056	0.8407	5.247	-28.2792		54.781	6.0854	0.623	-0.1936	5.6545	0.0833	0.0065	0.0158	-2.6382	-23.6518		54.766	0.1076	5.3178	-0.46	-0.0456	2.041
54.828	-1.4422	4.444	-0.0896	-0.5187	0.2189	-0.0445	-0.5552	7.1703	-29.0051		54.844	0.2769	8.2782	-0.2911	-0.0179	1.8813	-0.0445	3.1883	4.9265	-32.9066		54.843	-1.4162	4.3397	7.1307	-0.4761	-0.0095	7.2247	1.3483	5.7599	-28.0977		54.844	6.1635	0.6099	-0.2066	5.784	0.1382	-0.0032	0.5869	-1.8048	-23.1981		54.828	0.1076	5.2526	-0.4535	-0.0439	1.95
54.89	-1.5334	4.4701	-0.0506	-0.5835	0.2292	-0.0348	-0.4283	7.2985	-30.2753		54.906	0.2769	8.3825	-0.2976	-0.0179	2.0084	-0.0591	4.0132	4.8624	-32.5437		54.906	-1.4162	4.3267	7.1762	-0.4829	-0.006	7.2854	0.5869	5.5035	-27.7348		54.906	6.2416	0.5708	-0.2066	5.9799	0.1296	-0.0032	0.3331	-2.8306	-23.3796		54.891	0.1076	5.1744	-0.473	-0.0695	1.8899
54.953	-1.5985	4.4571	-0.0376	-0.609	0.2	-0.0421	-0.6821	7.2985	-30.3661		54.969	0.2769	8.4477	-0.2976	-0.0076	2.1149	-0.0494	3.6959	5.1829	-33.1788		54.968	-1.4162	4.3528	7.2087	-0.4898	0.0077	7.3754	0.3965	5.1829	-28.4606		54.969	6.3068	0.5708	-0.2131	6.1247	0.1039	0.0187	0.9676	-4.1127	-23.924		54.953	0.1076	5.0831	-0.473	-0.0661	1.7972
55.015	-1.6897	4.444	-0.0376	-0.626	0.1588	-0.0348	-0.3014	6.5292	-30.1846		55.031	0.2899	8.526	-0.2911	-0.0264	2.1681	-0.0567	2.7442	5.6317	-32.9973		55.031	-1.4292	4.3528	7.2477	-0.5	0.018	7.4677	1.031	5.1829	-27.8255		55.031	6.4109	0.5969	-0.2326	6.2287	0.1468	-0.0081	0.0158	-2.3818	-23.2888		55.016	0.1076	5.0179	-0.473	-0.0354	1.6838
55.078	-1.7808	4.4571	-0.0311	-0.6158	0.1691	-0.0372	-0.6186	6.3369	-30.729		55.094	0.2899	8.6303	-0.2976	-0.0008	2.2213	-0.047	1.4117	5.5676	-33.0881		55.093	-1.4422	4.3788	7.2802	-0.5	0.0214	7.5382	0.6503	5.1829	-27.4626		55.094	6.45	0.5708	-0.2391	6.4007	0.0936	0.0138	0.1427	-3.0229	-23.924		55.078	0.1076	4.9527	-0.4795	-0.0337	1.5825
55.14	-1.8459	4.4571	-0.0376	-0.6686	0.1399	-0.0348	-0.1745	6.0163	-31.3641		55.156	0.2899	8.6694	-0.2846	-0.0025	2.2815	-0.0494	2.4269	5.4394	-33.7232		55.156	-1.4422	4.3528	7.3192	-0.5119	-0.0009	7.6135	0.7138	5.8881	-28.2792		55.156	6.5412	0.5577	-0.2456	6.583	0.1571	0.0187	0.9041	-2.2536	-22.6537		55.141	0.1206	4.8744	-0.473	-0.0337	1.5378
55.203	-1.9371	4.444	-0.0376	-0.7214	0.1451	-0.0372	-0.6186	6.2087	-30.5475		55.219	0.2899	8.7737	-0.2911	0.0043	2.4635	-0.0275	3.4421	5.6958	-31.9085		55.218	-1.4552	4.3919	7.3582	-0.5204	0.0043	7.7156	0.9676	5.247	-28.0977		55.219	6.6193	0.5447	-0.2716	6.7738	0.1193	0.0065	0.7772	-2.2536	-23.1981		55.203	0.1076	4.7701	-0.4795	-0.0252	1.3953
55.265	-2.0153	4.4571	-0.0311	-0.793	0.1004	-0.03	-0.3014	7.4267	-31.6363		55.281	0.2769	8.852	-0.2976	0.0281	2.5871	-0.0324	4.2035	5.1829	-33.9047		55.281	-1.4552	4.3788	7.3906	-0.5051	0.006	7.7108	0.8407	5.1188	-27.9162		55.281	6.6975	0.5447	-0.2781	6.8743	0.1314	-0.0227	0.2062	-2.9588	-23.4703		55.266	0.1076	4.7179	-0.4795	-0.0269	1.3283
55.328	-2.0804	4.4571	-0.0246	-0.8663	0.0747	-0.0445	-0.238	6.978	-31.0012		55.344	0.2769	8.9042	-0.2911	-0.0025	2.7073	-0.0397	3.8228	5.1829	-33.2695		55.343	-1.4683	4.3788	7.3841	-0.5272	0.042	7.5358	0.3331	4.8624	-28.1884		55.344	6.7756	0.5317	-0.2976	7.1009	0.1846	-0.0008	0.7138	-3.4717	-23.1074		55.328	0.1076	4.6136	-0.4795	-0.0439	1.2974
55.39	-2.1585	4.4571	-0.0181	-0.902	0.0627	-0.0227	0.1427	6.2087	-32.1807		55.406	0.2639	8.9824	-0.2911	-0.0076	2.7778	-0.0421	3.3152	6.0804	-33.7232		55.406	-1.4683	4.3788	7.3646	-0.5034	0.0249	7.4264	1.0945	4.9906	-28.3699		55.406	6.8407	0.5186	-0.3041	7.2525	0.1348	-0.0032	0.3331	-3.087	-23.4703		55.391	0.1206	4.5353	-0.4925	-0.0405	1.2734
55.453	-2.2497	4.4571	-0.0181	-0.9395	0.0317	-0.0348	-0.1111	6.5933	-31.6363		55.469	0.2769	9.0998	-0.2976	0.0043	2.8344	-0.0494	3.569	5.4394	-34.5398		55.468	-1.4683	4.3919	7.3192	-0.5034	0.042	7.2174	0.3331	5.5035	-27.4626		55.469	6.9189	0.5317	-0.3041	7.4655	0.1296	-0.0008	0.7772	-3.5358	-22.9259		55.453	0.1206	4.4571	-0.486	-0.0337	1.1635
55.515	-2.3278	4.4571	-0.0246	-0.994	0.0146	-0.0324	0.1427	6.7215	-31.8178		55.531	0.2639	9.165	-0.2976	-0.0128	2.9409	-0.0445	2.8711	5.5035	-34.2676		55.531	-1.4422	4.3919	7.2802	-0.5017	0.0747	7.0886	0.7772	4.9265	-29.0051		55.531	6.997	0.5317	-0.3301	7.6631	0.1915	-0.0081	0.6503	-3.9204	-23.0166		55.516	0.1076	4.3658	-0.4925	-0.0337	1.0845
55.578	-2.406	4.4571	-0.0051	-1.0332	0.03	-0.03	-0.3648	6.7215	-32.2715		55.594	0.2639	9.2432	-0.2976	-0.0059	3.1092	-0.0591	2.5538	5.5676	-33.9954		55.593	-1.4422	4.3919	7.2477	-0.5085	0.0472	6.9646	0.3965	5.1829	-28.8236		55.594	7.0751	0.5186	-0.3366	7.6665	0.1537	0.0016	0.9676	-2.0613	-24.3776		55.578	0.1076	4.3006	-0.486	-0.0269	1.0226
55.64	-2.4841	4.4571	0.0014	-1.1576	-0.0129	-0.0397	-0.1111	6.8497	-31.2734		55.656	0.2769	9.3215	-0.2976	-0.0042	3.2277	-0.0664	3.8863	5.3753	-34.0861		55.656	-1.4422	4.3919	7.2152	-0.4761	0.0695	6.7824	0.7138	4.3495	-29.0051		55.656	7.1012	0.4925	-0.3366	7.3649	0.1073	-0.0129	0.0158	-0.3304	-23.1981		55.641	0.1076	4.2484	-0.4925	-0.0082	0.9557
55.703	-2.5492	4.4571	0.0014	-1.2002	-0.0352	-0.0324	-0.3014	7.2985	-32.09		55.719	0.2769	9.3997	-0.2976	-0.0111	3.3617	-0.0543	4.267	5.8881	-33.6325		55.718	-1.4683	4.3919	7.1762	-0.4659	0.0592	6.6487	0.6503	5.0547	-29.6402		55.719	7.0751	0.4925	-0.3366	6.9714	0.2052	-0.0129	0.8407	0.503	-21.202		55.703	0.0946	4.1441	-0.4925	-0.0286	0.9179
55.765	-2.6274	4.4701	0.0079	-1.2461	-0.0198	-0.0324	0.0793	6.401	-32.4529		55.781	0.2769	9.4649	-0.2976	0.0094	3.5059	-0.0275	4.5842	5.4394	-34.1769		55.781	-1.4552	4.3919	7.1502	-0.4625	0.097	6.5126	0.5869	4.7342	-28.9143		55.781	7.0361	0.4795	-0.3171	6.9169	0.03	-0.0081	-0.1111	-3.0229	-18.7522		55.766	0.1076	4.0919	-0.4925	-0.0354	0.8458
55.828	-2.7185	4.4701	0.0079	-1.2717	-0.0387	-0.0372	-0.0476	6.1446	-32.4529		55.844	0.2899	9.5301	-0.2911	0.0264	3.5574	-0.0543	3.8228	5.6958	-34.3583		55.843	-1.4552	4.3919	7.1112	-0.4387	0.097	6.3911	0.2062	5.1188	-27.9162		55.844	6.9449	0.4665	-0.2976	6.6494	0.1107	0.0016	-0.8724	-5.459	-16.9375		55.828	0.1206	4.0006	-0.4925	-0.0405	0.82
55.89	-2.8097	4.4701	0.0144	-1.3262	-0.0421	-0.0324	0.8407	7.2985	-33.451		55.906	0.2769	9.6345	-0.3041	0.0196	3.7292	-0.0251	3.4421	5.824	-34.3583		55.906	-1.4422	4.3788	7.0722	-0.4352	0.1142	6.2355	-0.3648	4.4136	-28.8236		55.906	6.8668	0.4534	-0.2846	6.1997	0.1691	-0.0057	1.031	-1.9972	-16.756		55.891	0.1206	3.9224	-0.4925	-0.032	0.7977
55.953	-2.8618	4.4701	0.0144	-1.4046	-0.0524	-0.0397	0.7138	7.2985	-33.1788		55.969	0.2769	9.6997	-0.3106	0.0043	3.8133	-0.0445	3.5056	6.0163	-34.4491		55.968	-1.4683	4.3919	7.0202	-0.4267	0.1125	6.097	-0.1111	4.9265	-28.0977		55.969	6.8147	0.4273	-0.2911	5.6767	0.0884	0.0162	1.2214	1.657	-17.6634		55.953	0.1076	3.8441	-0.4925	-0.0712	0.7547
56.015	-2.9529	4.4832	0.0144	-1.4966	-0.073	-0.0324	0.7772	6.978	-33.2695		56.031	0.2769	9.7649	-0.3041	-0.0076	3.973	-0.03	4.5208	5.7599	-34.6305		56.031	-1.4552	4.3788	7.0007	-0.454	0.1262	5.9755	0.5234	5.0547	-28.6421		56.031	6.7626	0.4404	-0.2716	5.7091	0.0936	-0.0105	0.6503	-0.4586	-16.3931		56.016	0.1076	3.7529	-0.4925	-0.0286	0.674
56.078	-3.005	4.5092	0.0274	-1.5783	-0.0455	-0.0348	0.5234	6.978	-32.09		56.094	0.2639	9.8692	-0.3171	0.0298	4.1173	-0.0348	4.4573	5.3111	-34.9027		56.093	-1.4683	4.3919	6.9617	-0.4148	0.1485	5.8442	0.5869	4.4777	-28.6421		56.094	6.6714	0.4404	-0.2456	5.5591	0.1176	0.0016	0.9041	-2.1254	-15.0321		56.078	0.1076	3.6746	-0.5055	-0.0286	0.6294
56.14	-3.0832	4.5223	0.0404	-1.6482	-0.0644	-0.0251	1.0945	7.5549	-34.0861		56.156	0.2769	9.9214	-0.3106	0.0264	4.2753	-0.0543	4.9649	5.0547	-34.2676		56.156	-1.4552	4.3919	6.9227	-0.4369	0.1434	5.7495	0.46	4.4777	-28.4606		56.156	6.6063	0.4273	-0.2326	5.2559	0.0661	-0.0129	0.46	-1.8048	-14.034		56.141	0.1076	3.5833	-0.5055	-0.0303	0.6002
56.203	-3.1743	4.5484	0.0599	-1.6635	-0.0558	-0.0421	0.8407	6.7856	-33.3603		56.219	0.2639	10.0257	-0.3171	0.0281	4.4006	-0.0494	5.5994	5.3111	-35.8101		56.218	-1.4552	4.3788	6.8902	-0.4165	0.1674	5.6109	0.3331	4.4777	-28.5514		56.219	6.5151	0.4273	-0.2131	5.0089	0.1296	-0.0057	1.2214	-0.9073	-13.7618		56.203	0.1076	3.5181	-0.499	-0.0235	0.5727
56.265	-3.2395	4.5875	0.0664	-1.7317	-0.0421	-0.0372	0.7138	6.2728	-33.2695		56.281	0.2639	10.0648	-0.3106	0.0247	4.5655	-0.0397	5.0918	5.5676	-35.3564		56.281	-1.4552	4.3919	6.8512	-0.3637	0.1554	5.4651	0.2696	3.7726	-28.4606		56.281	6.45	0.4273	-0.2066	4.876	0.085	0.0114	0.8407	-0.2663	-14.1247		56.266	0.1076	3.4529	-0.5055	-0.0082	0.6053
56.328	-3.3306	4.6266	0.0794	-1.8032	-0.0833	-0.03	1.4752	6.9138	-33.5417		56.344	0.2899	10.1561	-0.3236	0.0247	4.6651	-0.0494	3.8228	5.824	-35.9915		56.343	-1.4683	4.3919	6.8122	-0.3688	0.1605	5.3606	-0.238	4.4136	-28.007		56.344	6.3849	0.4404	-0.1936	4.5643	0.0764	0.0138	0.7138	0.6313	-13.2174		56.328	0.1076	3.3355	-0.512	-0.0218	0.5813
56.39	-3.3957	4.6527	0.0859	-1.8969	-0.0473	-0.0251	0.3965	6.978	-33.1788		56.406	0.2769	10.2213	-0.3236	0.0418	4.8918	-0.0543	4.1401	6.2728	-34.5398		56.406	-1.4422	4.3919	6.7732	-0.3586	0.1812	5.2196	0.5234	4.5419	-27.7348		56.406	6.3328	0.4273	-0.1741	4.3854	0.109	-0.0032	0.46	0.2466	-12.0379		56.391	0.1206	3.2703	-0.5055	-0.0303	0.5109
56.453	-3.4739	4.7179	0.1184	-2.0059	-0.0232	-0.0275	1.4752	7.5549	-34.1769		56.469	0.2769	10.2996	-0.3171	0.0298	4.9931	-0.0591	3.9497	5.4394	-34.812		56.468	-1.4422	4.3788	6.7408	-0.362	0.1743	5.0981	-0.1745	4.3495	-28.0977		56.469	6.2416	0.4404	-0.1741	4.3717	0.0781	0.0089	1.4117	-1.6125	-11.0398		56.453	0.1076	3.2051	-0.512	-0.0354	0.492
56.515	-3.565	4.7701	0.1379	-2.1116	-0.0747	-0.0421	1.031	7.7473	-33.9954		56.531	0.2899	10.3778	-0.3236	0.0554	5.1872	-0.0664	4.5208	6.0163	-34.9935		56.531	-1.4422	4.3919	6.7083	-0.3569	0.2069	5.0398	-0.1745	4.4777	-27.7348		56.531	6.1505	0.4404	-0.1741	4.1861	0.097	0.0259	1.8559	-1.4202	-10.4954		56.516	0.1206	3.1138	-0.5185	-0.0167	0.4559
56.578	-3.6432	4.8483	0.1639	-2.1354	-0.0404	-0.0372	1.031	7.7473	-33.6325		56.594	0.2769	10.43	-0.3301	0.0332	5.34	-0.0518	4.9014	5.7599	-35.9008		56.593	-1.4162	4.3919	6.6693	-0.3433	0.2035	4.9134	0.0158	4.5419	-27.644		56.594	6.0593	0.4273	-0.1741	3.9867	0.0609	0.0235	1.0945	-0.2663	-11.5842		56.578	0.1076	3.0356	-0.525	-0.0201	0.401
56.64	-3.7083	4.9266	0.1834	-2.2019	-0.0421	-0.0324	1.1579	7.4908	-34.0861		56.656	0.2769	10.5213	-0.3301	0.0281	5.5203	-0.0445	4.2035	5.5676	-35.9008		56.656	-1.4292	4.3919	6.6303	-0.3467	0.231	4.8211	0.0793	4.4777	-29.1865		56.656	5.9942	0.4273	-0.1611	3.7874	0.0627	-0.0251	1.031	-0.2021	-11.8564		56.641	0.1076	2.9443	-0.512	-0.015	0.4267
56.703	-3.7864	4.9527	0.1964	-2.2939	-0.0627	-0.0202	1.0945	6.7856	-33.9047		56.719	0.2769	10.5995	-0.3431	0.0605	5.6423	-0.0397	4.0766	5.5676	-35.4471		56.718	-1.4162	4.3919	6.5978	-0.3279	0.2155	4.6728	-0.238	4.029	-28.1884		56.719	5.9421	0.4404	-0.1676	3.566	0.0661	0.0041	1.4752	0.503	-11.2213		56.703	0.1076	2.853	-0.5315	-0.0218	0.4199
56.765	-3.8646	4.9918	0.2094	-2.3637	-0.0266	-0.0397	0.5869	7.0421	-33.451		56.781	0.2508	10.6647	-0.3366	0.0571	5.838	-0.0518	4.0132	5.247	-36.4452		56.781	-1.4031	4.3919	6.5458	-0.3245	0.2258	4.612	0.2696	4.6701	-28.1884		56.781	5.8509	0.4273	-0.1481	3.4944	0.0798	-0.0032	0.6503	-0.4586	-10.7676		56.766	0.1076	2.7748	-0.525	-0.0422	0.3821
56.828	-3.9297	5.0309	0.2224	-2.4761	-0.0576	-0.0421	0.7772	7.7473	-34.1769		56.844	0.2639	10.743	-0.3495	0.0571	6.0063	-0.0737	5.2821	6.0163	-35.8101		56.843	-1.4031	4.4049	6.5133	-0.3109	0.2327	4.4759	0.2062	4.3495	-27.644		56.844	5.7598	0.4404	-0.1546	3.4842	0.0592	0.0138	1.3483	-1.292	-11.6749		56.828	0.1076	2.6965	-0.5315	-0.0456	0.358
56.89	-4.0078	5.057	0.2484	-2.5937	-0.0352	-0.0227	1.4117	7.619	-33.2695		56.906	0.2508	10.8343	-0.356	0.0043	6.2382	-0.0737	4.9649	5.6958	-35.0842		56.906	-1.3901	4.3788	6.4808	-0.3075	0.2327	4.3787	0.5869	3.9649	-28.3699		56.906	5.6816	0.4925	-0.1481	3.336	0.1022	-0.0081	0.7138	-0.9073	-10.5861		56.891	0.0946	2.6313	-0.5315	-0.0388	0.3374
56.953	-4.073	5.057	0.2678	-2.6823	-0.0284	-0.0348	1.5386	8.5166	-34.0861		56.969	0.2378	10.8995	-0.356	0.0401	6.3326	-0.0567	4.6477	5.5035	-35.9915		56.968	-1.3641	4.3919	6.4418	-0.3041	0.2395	4.2669	0.3965	4.5419	-28.0977		56.969	5.6165	0.4665	-0.1546	3.152	0.1056	-0.0057	1.5386	-0.0739	-11.1305		56.953	0.1076	2.54	-0.5445	-0.0048	0.2653
57.015	-4.1511	5.07	0.2808	-2.8015	-0.0661	-0.0324	2.3	8.1319	-35.0842		57.031	0.2118	10.9777	-0.356	0.0452	6.6057	-0.0591	5.2187	5.4394	-36.0823		57.031	-1.3771	4.3919	6.4093	-0.3143	0.2258	4.1673	0.5869	4.606	-27.7348		57.031	5.5644	0.4925	-0.1481	2.9884	0.0472	0.0138	1.2848	0.6954	-11.4935		57.016	0.1076	2.4748	-0.5445	-0.0371	0.2567
57.078	-4.2292	5.1222	0.2938	-2.9037	-0.0455	-0.0421	0.7138	7.4267	-33.9047		57.094	0.1987	11.056	-0.356	0.023	6.7757	-0.0372	5.6628	5.8881	-35.0842		57.093	-1.3641	4.3919	6.3638	-0.299	0.2413	4.0652	-0.1111	4.4136	-27.4626		57.094	5.4863	0.5056	-0.1416	2.8641	0.0833	0.0162	0.7772	0.3107	-10.4954		57.078	0.1206	2.3835	-0.5445	-0.0048	0.2172
57.14	-4.3204	5.1744	0.3068	-3.0008	-0.061	-0.0275	1.2848	7.2344	-34.812		57.156	0.1987	11.1342	-0.3625	0.0503	6.9715	-0.0688	5.4725	5.4394	-36.3545		57.156	-1.3641	4.4049	6.3248	-0.2973	0.267	3.9777	0.2696	4.2854	-27.7348		57.156	5.4212	0.5317	-0.1416	2.784	0.0815	-0.0081	0.8407	1.2723	-10.5861		57.141	0.1076	2.3053	-0.551	-0.0116	0.2103
57.203	-4.3855	5.2004	0.3198	-3.0928	-0.0198	-0.03	1.4117	7.3626	-34.5398		57.219	0.1857	11.2516	-0.356	0.052	7.169	-0.064	5.4725	5.1829	-36.9896		57.218	-1.3511	4.3788	6.2923	-0.3177	0.2636	3.8854	-0.3014	4.2213	-28.0977		57.219	5.33	0.5317	-0.1416	2.7125	0.0472	-0.0032	0.6503	-0.2021	-10.3139		57.203	0.0946	2.227	-0.5575	-0.0133	0.2121
57.265	-4.4506	5.2265	0.3393	-3.2257	-0.0026	-0.0275	1.4752	7.9396	-34.4491		57.281	0.1857	11.3037	-0.369	0.0418	7.3854	-0.0713	5.9801	5.0547	-35.7193		57.281	-1.3511	4.3919	6.2533	-0.287	0.2533	3.7906	0.2696	4.029	-28.3699		57.281	5.2649	0.5708	-0.1416	2.6341	0.0884	0.0065	1.031	-0.8432	-10.0417		57.266	0.1076	2.1357	-0.5575	-0.0201	0.2395
57.328	-4.5288	5.2787	0.3523	-3.3416	-0.0507	-0.0397	0.5234	8.8371	-34.6305		57.344	0.1857	11.382	-0.3755	0.0418	7.5021	-0.064	6.2339	5.0547	-35.0842		57.343	-1.3511	4.3919	6.2208	-0.2904	0.2361	3.7152	-0.0476	4.7342	-28.7328		57.344	5.1867	0.5969	-0.1416	2.5012	0.0335	0.0016	0.0793	0.1184	-11.1305		57.328	0.1206	2.0705	-0.5705	-0.0405	0.2018
57.39	-4.5939	5.2787	0.3588	-3.5255	-0.0163	-0.0372	1.2848	8.6448	-34.5398		57.406	0.1857	11.4342	-0.3755	0.0247	7.746	-0.0591	6.2339	5.824	-36.3545		57.406	-1.338	4.3919	6.1754	-0.2819	0.2859	3.6326	0.3331	5.1188	-28.4606		57.406	5.1086	0.6099	-0.1416	2.3189	0.0249	-0.0057	0.7772	0.8236	-11.1305		57.391	0.1076	1.9923	-0.5705	-0.0218	0.1932
57.453	-4.646	5.3178	0.3848	-3.6278	0.0111	-0.0251	1.0945	8.196	-34.7213		57.469	0.1857	11.4994	-0.3755	0.0503	7.5794	-0.0713	3.3787	5.3753	-35.9915		57.468	-1.312	4.4049	6.1364	-0.2581	0.279	3.5208	0.46	4.606	-27.8255		57.469	5.0565	0.649	-0.1351	2.2133	0.0798	0.0405	0.7772	0.8236	-11.0398		57.453	0.1206	1.888	-0.577	-0.0082	0.1451
57.515	-4.7241	5.3308	0.3978	-3.6891	-0.0095	-0.0397	1.2214	8.7089	-34.9935		57.531	0.1857	11.5124	-0.382	0.0605	7.4558	-0.0616	2.8711	5.7599	-35.9915		57.531	-1.312	4.3788	6.1039	-0.27	0.2808	3.4503	0.1427	5.0547	-28.6421		57.531	4.9653	0.649	-0.1416	2.1997	0.0386	0.0065	0.46	-0.0098	-10.9491		57.516	0.1076	1.8227	-0.577	-0.0082	0.0833
57.578	-4.8023	5.37	0.4108	-3.8407	-0.0009	-0.0421	0.9676	7.4267	-35.0842		57.594	0.1597	11.4863	-0.3755	0.0281	7.0041	-0.064	2.9345	5.4394	-32.5437		57.593	-1.2859	4.3788	6.0584	-0.2479	0.2825	3.375	-0.3648	4.7983	-28.6421		57.594	4.8742	0.6751	-0.1416	2.152	0.073	0.0016	1.3483	-0.5227	-10.6769		57.578	0.1076	1.7445	-0.59	-0.0405	0.0644
57.64	-4.8804	5.3961	0.4238	-3.9855	-0.0129	-0.0251	1.1579	8.2601	-34.9027		57.656	0.1727	11.4081	-0.369	0.0418	6.5576	-0.064	1.0945	5.8881	-31.7271		57.656	-1.299	4.3919	6.0259	-0.2598	0.2842	3.2705	0.2062	4.7342	-27.9162		57.656	4.796	0.6882	-0.1416	2.077	0.1039	-0.0081	1.1579	-1.2279	-10.2232		57.641	0.1076	1.6663	-0.59	-0.015	0.0489
57.703	-4.9716	5.3961	0.4303	-4.1167	-0.0078	-0.047	0.8407	8.8371	-34.4491		57.719	0.1857	11.3298	-0.356	0.0264	6.2777	-0.0616	2.6807	5.3111	-28.9143		57.718	-1.2729	4.3919	5.9934	-0.2308	0.2825	3.2146	0.0158	4.6701	-28.4606		57.719	4.7309	0.7273	-0.1416	1.9169	0.0524	0.0041	-0.0476	0.1184	-10.5861		57.703	0.1206	1.6141	-0.5965	-0.0388	0.0524
57.765	-5.0107	5.4091	0.4433	-4.224	0.0146	-0.0372	0.7138	8.4524	-35.0842		57.781	0.1727	11.2777	-0.369	0.0384	5.9497	-0.0543	1.6655	5.3111	-28.4606		57.781	-1.2599	4.418	5.9544	-0.2359	0.2979	3.1295	-0.0476	4.3495	-28.2792		57.781	4.6267	0.7273	-0.1416	1.7789	0.1022	0.0041	0.5234	0.5672	-9.8603		57.766	0.1206	1.5358	-0.603	-0.0576	0.0472
57.828	-5.0627	5.4221	0.4563	-4.379	-0.0181	-0.0445	0.5869	8.7089	-34.9935		57.844	0.1857	11.1864	-0.3495	0.0179	5.5444	-0.047	1.4752	5.3753	-27.4626		57.843	-1.2469	4.4049	5.9154	-0.2121	0.3082	3.0445	0.3331	4.4777	-28.4606		57.844	4.5877	0.7534	-0.1351	1.7073	0.0712	0.0381	0.7138	0.3748	-9.951		57.828	0.1076	1.4315	-0.603	-0.0405	0.0335
57.89	-5.1669	5.4352	0.4758	-4.5409	0.0317	-0.0251	1.6655	8.6448	-34.9027		57.906	0.1727	11.1212	-0.3431	-0.0179	5.2679	-0.0445	1.3483	5.3753	-27.3718		57.906	-1.2469	4.3919	5.8829	-0.2104	0.3134	2.9667	-0.1111	4.1572	-28.4606		57.906	4.4965	0.7534	-0.1416	1.6443	0.073	0.0138	0.3331	0.6313	-10.2232		57.891	0.0946	1.3533	-0.616	-0.032	0.0386
57.953	-5.219	5.4873	0.4693	-4.6976	0.042	-0.0397	1.031	8.2601	-34.812		57.969	0.1727	11.056	-0.3366	0.0332	5	-0.0445	0.46	5.6317	-26.283		57.968	-1.2338	4.3919	5.8374	-0.224	0.2996	2.8792	-0.3014	4.606	-28.1884		57.969	4.3923	0.7794	-0.1416	1.6409	0.097	0.0211	0.8407	-0.6509	-10.4047		57.953	0.1206	1.262	-0.6225	-0.0167	-0.0215
58.015	-5.2972	5.4743	0.4823	-4.8152	-0.0078	-0.0445	0.9676	8.3242	-35.6286		58.031	0.1727	10.9908	-0.3301	0.0196	4.684	-0.0591	-0.3648	5.0547	-25.5572		58.031	-1.2469	4.3919	5.7984	-0.2138	0.2962	2.7941	0.2062	4.2213	-28.4606		58.031	4.3142	0.7925	-0.1416	1.5251	0.0867	0.0138	-0.1745	0.1184	-10.5861		58.016	0.0946	1.1968	-0.629	-0.0644	-0.0335
58.078	-5.3493	5.5004	0.4823	-4.96	0.0489	-0.0202	0.7138	8.0678	-35.8101		58.094	0.1727	10.9125	-0.3236	-0.023	4.5621	-0.0494	0.46	5.7599	-25.5572		58.093	-1.2338	4.3658	5.7724	-0.2036	0.3031	2.7358	0.2062	4.2213	-28.4606		58.094	4.249	0.8055	-0.1351	1.4518	0.1228	0.0259	0.46	0.503	-10.4047		58.078	0.1076	1.1185	-0.629	-0.015	-0.061
58.14	-5.4274	5.5004	0.5018	-5.1031	-0.0198	-0.0445	1.0945	8.8371	-35.3564		58.156	0.1987	10.8473	-0.3236	0.006	4.3165	-0.0737	-0.809	4.7342	-26.1923		58.156	-1.2208	4.3919	5.7269	-0.2053	0.3014	2.675	-0.238	4.9265	-27.8255		58.156	4.1839	0.8186	-0.1416	1.3309	0.1073	0.0308	0.5869	0.7595	-10.8583		58.141	0.1076	1.0272	-0.6485	-0.0218	-0.0713
58.203	-5.4925	5.5265	0.5148	-5.299	0.006	-0.0372	0.46	9.0935	-35.3564		58.219	0.1857	10.743	-0.3171	-0.0315	4.107	-0.047	-0.5552	4.9906	-25.4664		58.218	-1.2338	4.4049	5.6879	-0.2172	0.31	2.6094	0.0793	4.0931	-29.0051		58.219	4.0928	0.8316	-0.1416	1.2593	0.0833	0.0016	0.3331	0.8877	-9.2251		58.203	0.1206	0.949	-0.6485	-0.0473	-0.0764
58.265	-5.5576	5.5525	0.5278	-5.4301	0.0146	-0.0348	1.2214	9.2217	-35.6286		58.281	0.1857	10.6778	-0.3171	-0.023	3.8889	-0.047	-0.1111	5.4394	-24.8313		58.281	-1.2208	4.3658	5.6489	-0.1831	0.2962	2.5195	-0.238	4.029	-28.6421		58.281	4.0146	0.8447	-0.1416	1.2014	0.1142	-0.0032	0.5234	0.8236	-9.951		58.266	0.1076	0.8447	-0.6485	-0.0184	-0.1022
58.328	-5.6228	5.5525	0.5408	-5.6192	0.0575	-0.0421	1.4752	9.6064	-36.5359		58.344	0.1857	10.5995	-0.3171	-0.0042	3.6742	-0.0494	0.2062	5.3753	-25.6479		58.343	-1.2208	4.3919	5.6099	-0.2155	0.3254	2.4587	-0.238	5.0547	-28.7328		58.344	3.9495	0.8577	-0.1351	1.1946	0.1245	0.0138	0.8407	0.1184	-10.5861		58.328	0.1076	0.7794	-0.6615	-0.0303	-0.1623
58.39	-5.6748	5.5786	0.5603	-5.7385	0.0232	-0.0154	1.0945	8.8371	-35.7193		58.406	0.1727	10.5213	-0.3106	-0.0025	3.4973	-0.0372	-0.6186	5.4394	-25.1942		58.406	-1.2078	4.3919	5.571	-0.2002	0.3168	2.415	-0.1745	4.3495	-28.3699		58.406	3.8583	0.8707	-0.1416	1.106	0.0798	0.0114	0.6503	0.8236	-9.8603		58.391	0.1206	0.7012	-0.6615	-0.0133	-0.2344
58.453	-5.766	5.5786	0.5473	-5.8646	0.0747	-0.0227	1.2214	8.3242	-36.3545		58.469	0.1857	10.43	-0.3106	-0.0076	3.3513	-0.0591	-0.7455	5.9522	-25.0128		58.468	-1.2078	4.3919	5.5385	-0.195	0.3151	2.3105	-0.3648	4.5419	-28.7328		58.469	3.7672	0.8838	-0.1546	0.985	0.1193	0.0089	0.3965	0.6954	-9.4973		58.453	0.1206	0.636	-0.668	-0.015	-0.219
58.515	-5.8311	5.6178	0.5603	-6.0843	0.0627	-0.0275	1.4117	9.7987	-36.2637		58.531	0.1857	10.3778	-0.3041	-0.0128	3.2019	-0.0397	-0.9993	5.3111	-25.3757		58.531	-1.1948	4.3788	5.4995	-0.2019	0.3357	2.2716	-0.8724	3.7726	-28.2792		58.531	3.7151	0.8968	-0.1546	0.9084	0.1107	0.0065	-0.1111	0.3107	-9.4066		58.516	0.1206	0.5447	-0.6745	-0.0422	-0.1984
58.578	-5.8962	5.6178	0.5733	-6.3126	0.0111	-0.0275	1.031	9.6705	-36.7174		58.594	0.1727	10.2996	-0.3041	-0.0502	3.0079	-0.0543	-0.5552	4.8624	-25.6479		58.593	-1.1817	4.3919	5.4475	-0.1746	0.322	2.189	-0.809	4.606	-28.2792		58.594	3.6369	0.9099	-0.1546	0.8522	0.085	0.0138	0.2062	0.8877	-10.4047		58.578	0.1076	0.4665	-0.681	-0.0116	-0.2293
58.64	-5.9744	5.6438	0.5798	-6.425	0.1073	-0.0397	0.7772	9.2858	-36.6267		58.656	0.1727	10.2213	-0.2976	-0.0059	2.8997	-0.0421	-0.4917	5.3111	-25.8294		58.656	-1.1687	4.4049	5.415	-0.1729	0.3168	2.1258	-0.5552	3.8367	-29.0958		58.656	3.5588	0.9099	-0.1546	0.8385	0.109	-0.0081	-0.5552	-0.0098	-10.1325		58.641	0.1076	0.4013	-0.694	0.0072	-0.2722
58.703	-6.0525	5.683	0.5928	-6.6056	0.0455	-0.047	0.9041	9.5423	-36.7174		58.719	0.1597	10.13	-0.2976	-0.0059	2.7829	-0.047	-0.809	4.8624	-25.1942		58.718	-1.1687	4.4049	5.3825	-0.1814	0.3391	2.0893	-0.3014	4.3495	-28.3699		58.719	3.4676	0.9359	-0.1546	0.7738	0.0919	0.0235	0.7772	0.3107	-10.2232		58.703	0.1076	0.31	-0.6875	0.0021	-0.3255
58.765	-6.1307	5.683	0.6058	-6.7896	0.0867	-0.0324	1.4752	8.4524	-36.0823		58.781	0.1727	10.0648	-0.3041	-0.023	2.6284	-0.0421	-0.238	5.1829	-24.5591		58.781	-1.1557	4.3788	5.3435	-0.1797	0.3203	1.9994	-0.3014	3.9649	-29.5495		58.781	3.3895	0.9359	-0.1611	0.6869	0.1039	0.0187	0.8407	0.8877	-9.951		58.766	0.0946	0.2448	-0.7005	0.0174	-0.3924
58.828	-6.1958	5.709	0.6123	-6.9702	0.0661	-0.0178	1.2848	10.0551	-36.6267		58.844	0.1987	9.9866	-0.3041	-0.0298	2.5013	-0.0664	-1.5069	5.824	-24.4684		58.843	-1.1557	4.3919	5.3045	-0.1746	0.3048	1.9313	-1.0628	3.9649	-29.6402		58.844	3.2983	0.9099	-0.1676	0.6614	0.1159	0.0405	0.6503	0.4389	-9.4066		58.828	0.0946	0.1665	-0.694	0.0004	-0.389
58.89	-6.2609	5.7221	0.6253	-7.1797	0.0919	-0.0348	1.2848	10.0551	-36.6267		58.906	0.1857	9.9214	-0.2911	-0.0247	2.345	-0.064	-1.2531	5.1829	-25.1035		58.906	-1.1557	4.4049	5.2655	-0.2002	0.3237	1.8949	-0.6186	4.1572	-28.5514		58.906	3.2462	0.9359	-0.1611	0.5949	0.0661	0.0235	0.6503	0.4389	-11.1305		58.891	0.1206	0.0491	-0.7005	-0.0184	-0.3632
58.953	-6.3521	5.7221	0.6318	-7.391	0.1331	-0.03	0.9676	10.5039	-36.0823		58.969	0.1727	9.8431	-0.2911	-0.0468	2.2231	-0.0324	-0.4917	5.3111	-25.0128		58.968	-1.1557	4.3919	5.2265	-0.1542	0.3391	1.8511	-0.9993	4.4136	-29.0051		58.969	3.1551	0.9359	-0.1806	0.5608	0.1073	0.0187	0.3331	1.0159	-9.3159		58.953	0.1076	-0.003	-0.7135	-0.0201	-0.3924
59.015	-6.4172	5.7351	0.6383	-7.6482	0.1107	-0.0397	0.9041	10.8244	-36.9896		59.031	0.1597	9.7388	-0.2911	-0.0264	2.1097	-0.0567	-1.6338	4.9265	-24.922		59.031	-1.1297	4.3788	5.194	-0.1916	0.3254	1.7515	-0.6186	4.2854	-29.1865		59.031	3.0769	0.9229	-0.1806	0.5728	0.1022	0.0284	0.0158	-0.0739	-8.9529		59.016	0.1076	-0.0943	-0.72	-0.0048	-0.4628
59.078	-6.4953	5.7351	0.6513	-7.7794	0.0987	-0.0324	0.9676	10.2475	-35.7193		59.094	0.1727	9.6736	-0.2911	-0.0553	2.029	-0.0251	-0.9993	5.4394	-24.4684		59.093	-1.1427	4.4049	5.1615	-0.1746	0.3323	1.7126	-0.7455	4.7983	-28.8236		59.094	2.9988	0.9359	-0.2001	0.5165	0.0695	0.0065	1.1579	0.4389	-9.6788		59.078	0.0946	-0.1595	-0.72	-0.0013	-0.4869
59.14	-6.5344	5.7612	0.6578	-7.5392	0.1417	-0.0372	0.8407	7.8114	-35.9915		59.156	0.1727	9.5823	-0.2911	-0.0656	1.9328	-0.0445	-0.4283	5.5035	-24.5591		59.156	-1.1166	4.4049	5.1095	-0.1661	0.3168	1.6859	-0.238	3.5161	-29.8217		59.156	2.9076	0.949	-0.2066	0.4671	0.1502	0.0138	0.2696	0.3107	-9.951		59.141	0.0946	-0.2769	-0.7395	-0.0116	-0.5144
59.203	-6.5474	5.7612	0.6643	-7.5085	0.0867	-0.0324	0.2696	7.2344	-35.9915		59.219	0.1857	9.491	-0.2911	-0.04	1.8212	-0.03	-0.4917	5.824	-23.7425		59.218	-1.1427	4.3919	5.0705	-0.1593	0.3134	1.6373	-0.3648	4.6701	-29.7309		59.219	2.8425	0.9359	-0.2196	0.4467	0.0747	0.0259	0.0793	0.503	-10.1325		59.203	0.1206	-0.316	-0.7395	0.0191	-0.5281
59.265	-6.5344	5.7743	0.6643	-6.8629	0.1365	-0.0421	0.2696	6.2728	-34.2676		59.281	0.1727	9.4258	-0.2846	-0.0553	1.7405	-0.0348	-1.3166	5.247	-23.0166		59.281	-1.1166	4.3788	5.0315	-0.1576	0.3288	1.5498	-1.5069	4.1572	-28.8236		59.281	2.7644	0.9229	-0.2196	0.3905	0.1142	0.0065	-0.0476	0.2466	-10.3139		59.266	0.1076	-0.4073	-0.7525	-0.0048	-0.5625
59.328	-6.4563	5.7482	0.6643	-6.546	0.3048	-0.0081	0.3965	7.8755	-31.8178		59.344	0.1857	9.3606	-0.2716	-0.057	1.598	-0.0567	-0.9993	5.1829	-24.5591		59.343	-1.1297	4.3788	4.9861	-0.161	0.3151	1.5182	-0.5552	4.4777	-28.9143		59.344	2.6862	0.9359	-0.2261	0.3326	0.1245	0.0284	0.2062	0.8877	-9.4973		59.328	0.1076	-0.4856	-0.746	0.0055	-0.5934
59.39	-6.4172	5.7482	0.6643	-6.4744	0.1434	-0.0518	-0.1745	9.8628	-31.0012		59.406	0.1987	9.2824	-0.2781	-0.0434	1.5087	-0.0518	-1.8242	4.9906	-23.7425		59.406	-1.1166	4.3788	4.9471	-0.1542	0.3117	1.4647	-1.0628	4.606	-29.4587		59.406	2.6081	0.9359	-0.2261	0.2917	0.0833	0.0162	0.3331	0.7595	-10.0417		59.391	0.1076	-0.5768	-0.759	0.0038	-0.6432
59.453	-6.339	5.7612	0.6513	-5.9327	0.1331	-0.0275	-0.3014	7.6831	-30.4568		59.469	0.1727	9.2041	-0.2716	-0.04	1.4125	-0.0421	-0.9359	4.8624	-24.2869		59.468	-1.1036	4.3658	4.9016	-0.1473	0.3288	1.4331	-0.1745	4.4777	-29.0958		59.469	2.5299	0.9229	-0.2326	0.2508	0.1348	0.0259	-0.0476	0.7595	-9.3159		59.453	0.1076	-0.6551	-0.759	-0.015	-0.6483
59.515	-6.287	5.7482	0.6513	-5.4336	0.2378	-0.0154	0.3331	5.247	-30.2753		59.531	0.1857	9.0998	-0.2651	-0.0434	1.385	-0.0567	-1.5069	5.1829	-23.6518		59.531	-1.1036	4.3658	4.8626	-0.1422	0.3237	1.3748	-0.6186	4.2854	-29.2773		59.531	2.4518	0.9359	-0.2456	0.2712	0.1657	0.0089	-0.3014	0.503	-10.3139		59.516	0.1076	-0.7203	-0.7655	-0.0048	-0.7067
59.578	-6.2349	5.7482	0.6448	-5.3467	0.2602	-0.0251	0.0793	6.1446	-29.9124		59.594	0.1727	8.9954	-0.2716	-0.0502	1.3369	-0.0251	-1.4435	4.8624	-23.8332		59.593	-1.0906	4.3658	4.8301	-0.1388	0.3168	1.3116	-1.0628	4.4777	-29.368		59.594	2.3737	0.9359	-0.2651	0.2474	0.073	0.0284	0.3965	0.4389	-9.8603		59.578	0.1076	-0.8246	-0.772	0.0021	-0.7617
59.64	-6.1437	5.7612	0.6383	-5.0519	0.2275	-0.0057	0.3965	7.4908	-27.8255		59.656	0.1727	8.9433	-0.2716	-0.0298	1.2785	-0.0397	-1.5069	4.7983	-23.924		59.656	-1.0906	4.3788	4.7846	-0.1388	0.3306	1.2679	-0.7455	4.2854	-28.7328		59.656	2.2825	0.9229	-0.2846	0.2457	0.1125	0.0187	0.6503	0.8236	-10.1325		59.641	0.1206	-0.929	-0.7785	-0.0048	-0.8166
59.703	-6.0916	5.7612	0.6318	-4.7572	0.243	-0.0275	0.46	6.5292	-28.3699		59.719	0.1857	8.865	-0.2716	-0.0349	1.1566	-0.0543	-2.1414	5.0547	-22.563		59.718	-1.0776	4.3788	4.7521	-0.1405	0.3185	1.2144	-0.7455	4.2854	-29.7309		59.719	2.2174	0.9359	-0.2976	0.215	0.1262	0.0381	0.3965	0.8236	-9.8603		59.703	0.1076	-0.9811	-0.785	0.0242	-0.9179
59.765	-6.0265	5.7612	0.6253	-4.5238	0.231	-0.0348	0.1427	5.6958	-28.9143		59.781	0.1857	8.7868	-0.2651	-0.0366	1.0965	-0.0518	-1.7607	4.5419	-23.561		59.781	-1.0776	4.3788	4.7066	-0.1456	0.3031	1.1706	-1.2531	4.6701	-29.4587		59.781	2.1392	0.9229	-0.3041	0.1622	0.0867	0.0284	0.1427	0.6954	-9.951		59.766	0.1076	-1.0333	-0.785	0.0174	-0.9008
59.828	-5.9744	5.7612	0.6188	-4.3518	0.2636	-0.0202	-0.0476	5.6317	-27.2811		59.844	0.1987	8.6825	-0.2521	-0.0639	1.0141	-0.0518	-1.8242	5.5035	-23.2888		59.843	-1.0776	4.3658	4.6741	-0.1116	0.3203	1.1172	-1.1262	4.4136	-28.6421		59.844	2.0611	0.9229	-0.3106	0.1452	0.1176	0.0016	0.46	1.2723	-9.951		59.828	0.1076	-1.1376	-0.7915	0.0072	-0.863
59.89	-5.8962	5.7743	0.6123	-4.0468	0.2602	-0.047	-0.3648	4.5419	-27.3718		59.906	0.1727	8.6303	-0.2586	-0.069	1.0123	-0.0372	-0.809	5.3753	-22.3815		59.906	-1.0645	4.3658	4.6351	-0.0979	0.3237	1.088	-0.5552	4.3495	-29.6402		59.906	1.983	0.9359	-0.3171	0.1247	0.121	-0.0057	0.5234	0.9518	-10.4047		59.891	0.1076	-1.2159	-0.8045	0.0089	-0.8922
59.953	-5.8442	5.7612	0.5993	-3.9225	0.2602	-0.0178	0.0158	5.1829	-26.4645		59.969	0.1857	8.539	-0.2586	-0.0588	1.0055	-0.0348	-1.1262	4.5419	-22.6537		59.968	-1.0776	4.3658	4.5961	-0.1269	0.3288	1.0394	-0.9359	4.606	-28.9143		59.969	1.9048	0.9229	-0.3236	0.0787	0.1125	0.0332	0.3331	0.8877	-9.5881		59.953	0.1076	-1.3072	-0.8045	0.0038	-0.966
60.015	-5.766	5.7482	0.5993	-3.7402	0.2756	-0.0445	0.2062	5.7599	-26.1923		60.031	0.1727	8.4477	-0.2521	-0.0213	0.9333	-0.0518	-1.5704	5.247	-23.4703		60.031	-1.0776	4.3788	4.5636	-0.0962	0.3357	1.0175	-1.1897	4.2213	-29.7309		60.031	1.8137	0.9229	-0.3431	0.0634	0.1314	0.0259	0.9041	0.6954	-10.4954		60.016	0.1076	-1.3854	-0.811	0.0089	-1.0639
60.078	-5.6879	5.7482	0.5928	-3.5153	0.2893	-0.0129	-0.3014	4.8624	-26.646		60.094	0.1857	8.3695	-0.2586	-0.0315	0.875	-0.047	-1.2531	4.7983	-22.9259		60.093	-1.0515	4.3658	4.5246	-0.0996	0.3288	0.9641	-0.6186	5.0547	-29.1865		60.094	1.7355	0.9359	-0.356	0.0566	0.1176	0.0527	0.3965	0.5672	-9.951		60.078	0.0946	-1.4506	-0.811	0.0157	-1.1017
60.14	-5.6228	5.7482	0.5863	-3.3109	0.279	-0.0421	-0.5552	4.4777	-26.1923		60.156	0.1597	8.2912	-0.2521	-0.0519	0.82	-0.0324	-1.4435	5.1188	-22.3815		60.156	-1.0645	4.3658	4.4856	-0.1167	0.3323	0.93	-0.9993	4.6701	-28.6421		60.156	1.6574	0.9359	-0.382	0.077	0.1245	0.0235	0.6503	0.1825	-10.6769		60.141	0.0946	-1.5158	-0.8175	0.0327	-1.1326
60.203	-5.5576	5.7482	0.5668	-3.0775	0.2911	-0.0348	-0.4283	4.7342	-26.1923		60.219	0.1857	8.213	-0.2521	-0.0553	0.7754	-0.0251	-1.8876	5.1829	-21.5649		60.218	-1.0515	4.3658	4.4466	-0.1013	0.3168	0.8912	-1.2531	4.5419	-29.1865		60.219	1.5792	0.9359	-0.395	0.06	0.121	0.0114	-0.238	0.4389	-9.5881		60.203	0.1076	-1.5941	-0.8175	-0.003	-1.1549
60.265	-5.5055	5.7482	0.5603	-2.9463	0.279	-0.0348	-0.809	4.4136	-27.0996		60.281	0.1597	8.1217	-0.2326	-0.0536	0.7908	-0.0421	-1.7607	5.1829	-22.2908		60.281	-1.0515	4.3788	4.4076	-0.1013	0.3306	0.8547	-1.3166	4.606	-29.2773		60.281	1.475	0.9229	-0.421	0.0583	0.1296	0.0211	0.0793	0.1184	-10.8583		60.266	0.1076	-1.6984	-0.837	0.0208	-1.124
60.328	-5.4404	5.7351	0.5538	-2.7896	0.2928	-0.0202	-1.1262	4.1572	-25.285		60.344	0.1727	8.0565	-0.2391	-0.057	0.7324	-0.0445	-1.7607	4.6701	-22.1093		60.343	-1.0515	4.3658	4.3687	-0.0911	0.3203	0.8134	-1.3166	4.0931	-29.5495		60.344	1.436	0.9359	-0.434	0.031	0.0987	0.0308	0.9041	0.8236	-10.6769		60.328	0.1076	-1.7766	-0.8435	-0.003	-1.1549
60.39	-5.3623	5.7221	0.5473	-2.5988	0.2928	-0.0397	-1.0628	4.7342	-25.1942		60.406	0.1727	7.9913	-0.2326	-0.0468	0.6809	-0.047	-2.3952	5.4394	-22.1093		60.406	-1.0515	4.3788	4.3297	-0.1013	0.334	0.7794	-1.1897	4.4777	-29.1865		60.406	1.3318	0.9359	-0.447	0.0378	0.0987	0.0187	0.2062	0.6313	-10.6769		60.391	0.0815	-1.8679	-0.8565	0.0327	-1.2322
60.453	-5.3102	5.7351	0.5343	-2.4438	0.2876	-0.0202	-0.9359	5.1188	-26.283		60.469	0.1597	7.9	-0.2261	-0.0588	0.6483	-0.0543	-1.4435	4.9906	-22.7444		60.468	-1.0385	4.3788	4.2972	-0.1116	0.334	0.7478	-0.9359	3.9649	-30.1846		60.469	1.2667	0.9359	-0.4535	-0.032	0.1004	0.0235	0.5234	0.9518	-10.1325		60.453	0.0815	-1.9201	-0.8565	0.0106	-1.3713
60.515	-5.2451	5.709	0.5213	-2.299	0.2928	-0.0227	-1.1262	4.6701	-25.8294		60.531	0.1987	7.8087	-0.2261	-0.0707	0.6362	-0.0543	-1.8242	5.5035	-21.7464		60.531	-1.0385	4.3528	4.2647	-0.0962	0.3357	0.7235	-0.9993	4.5419	-29.4587		60.531	1.1885	0.9359	-0.473	-0.0303	0.1331	0.0478	0.46	1.0159	-10.2232		60.516	0.0815	-1.9983	-0.863	0.0225	-1.3902
60.578	-5.1669	5.709	0.5148	-2.1967	0.2756	-0.0227	-0.6186	4.4136	-26.1016		60.594	0.1727	7.7174	-0.2326	-0.0775	0.6637	-0.0275	-0.9359	5.247	-21.9278		60.593	-1.0645	4.3658	4.2257	-0.103	0.346	0.6992	-0.4283	4.0931	-29.368		60.594	1.0974	0.9359	-0.486	-0.0218	0.1245	0.0405	0.7772	1.08	-10.9491		60.578	0.0685	-2.0896	-0.8695	-0.0013	-1.3524
60.64	-5.1148	5.696	0.5083	-2.0094	0.3065	-0.0251	-0.6186	3.5161	-25.7386		60.656	0.1727	7.6522	-0.2261	-0.0434	0.6362	-0.0324	-1.6338	4.7983	-22.0186		60.656	-1.0255	4.3658	4.1867	-0.086	0.3357	0.6578	-1.4435	4.4777	-30.0939		60.656	1.0192	0.9229	-0.499	-0.0525	0.1073	0.0454	0.3965	1.4647	-10.4954		60.641	0.0555	-2.1679	-0.889	0.0242	-1.3541
60.703	-5.0367	5.709	0.4953	-1.9174	0.3168	-0.0129	-1.1262	4.5419	-25.0128		60.719	0.1857	7.5609	-0.2326	-0.0605	0.6397	-0.0324	-1.4435	5.6317	-22.0186		60.718	-1.0255	4.3788	4.1542	-0.1065	0.3426	0.6311	-0.7455	4.4136	-29.8217		60.719	0.9281	0.9359	-0.5055	-0.0576	0.109	0.0162	-0.1111	0.8236	-10.4954		60.703	0.0425	-2.2461	-0.8955	0.0412	-1.3954
60.765	-4.9586	5.696	0.4953	-1.7794	0.322	-0.0275	-1.0628	4.4777	-25.4664		60.781	0.1727	7.4696	-0.2326	-0.057	0.5607	-0.0445	-1.38	5.0547	-23.1074		60.781	-1.0255	4.3658	4.1152	-0.1013	0.3306	0.6068	-0.8724	4.2854	-29.368		60.781	0.8629	0.9359	-0.5315	-0.078	0.1056	0.0381	0.2062	0.503	-12.4915		60.766	0.0164	-2.3374	-0.902	0.0208	-1.4641
60.828	-4.9065	5.683	0.4758	-1.7163	0.3065	-0.0057	-0.5552	4.2213	-25.6479		60.844	0.1727	7.3914	-0.2131	-0.0366	0.5229	-0.0372	-2.649	4.5419	-21.4742		60.843	-1.0255	4.3658	4.0827	-0.0843	0.3409	0.5922	-1.3166	4.2213	-30.0939		60.844	0.7457	0.9229	-0.5315	-0.1104	0.121	0.0332	-0.0476	0.6313	-11.312		60.828	0.0164	-2.4026	-0.9085	0.0089	-1.6032
60.89	-4.8413	5.6569	0.4693	-1.5579	0.3323	-0.0421	-1.0628	4.606	-25.285		60.906	0.1727	7.287	-0.2066	-0.057	0.5469	-0.0227	-1.38	5.5676	-22.0186		60.906	-1.0124	4.3788	4.0437	-0.0996	0.3323	0.5485	-0.6186	4.7983	-29.6402		60.906	0.6676	0.9229	-0.5445	-0.0933	0.1142	0.0235	0.46	1.5288	-11.2213		60.891	-0.0096	-2.4809	-0.9085	0.031	-1.6633
60.953	-4.7502	5.6569	0.4693	-1.4284	0.3426	-0.03	-1.6973	3.7084	-25.285		60.969	0.1727	7.2218	-0.2066	-0.0519	0.5452	-0.0445	-1.6973	5.247	-22.1093		60.968	-1.0255	4.3658	4.0112	-0.0962	0.3391	0.5509	-0.6821	4.8624	-29.7309		60.969	0.5764	0.9359	-0.5705	-0.1053	0.109	0.0381	0.0158	0.9518	-10.9491		60.953	-0.0096	-2.5591	-0.9215	0.0327	-1.6306
61.015	-4.6981	5.6308	0.4563	-1.3535	0.3598	-0.0202	-1.1262	4.1572	-24.6498		61.031	0.1727	7.1305	-0.2131	-0.0553	0.5693	-0.0445	-1.2531	5.6958	-22.0186		61.031	-1.0124	4.3788	3.9722	-0.0911	0.3477	0.4804	-1.3166	4.3495	-29.6402		61.031	0.5243	0.9359	-0.5835	-0.0831	0.121	0.0284	-0.3648	0.0543	-11.7657		61.016	-0.0096	-2.6374	-0.928	0.0685	-1.6186
61.078	-4.6199	5.6047	0.4368	-1.2342	0.3323	-0.0372	-1.8242	3.5802	-24.6498		61.094	0.1857	7.0393	-0.2066	-0.0349	0.5281	-0.0445	-2.5221	5.1829	-21.8371		61.093	-1.0124	4.3658	3.9527	-0.1116	0.3271	0.4658	-1.1897	4.4777	-29.7309		61.094	0.4332	0.9359	-0.6095	-0.0814	0.109	0.0138	-0.238	0.3107	-12.0379		61.078	-0.0227	-2.7156	-0.9345	0.0242	-1.7217
61.14	-4.5418	5.5917	0.4433	-1.103	0.3271	-0.0275	-1.3166	3.7084	-24.922		61.156	0.1727	6.974	-0.1936	-0.0485	0.4628	-0.0421	-2.0145	5.1829	-22.1093		61.156	-0.9994	4.3658	3.9007	-0.086	0.3288	0.4683	-0.6186	4.4136	-30.1846		61.156	0.355	0.9229	-0.6225	-0.1053	0.1193	0.0187	-0.4283	0.1184	-11.8564		61.141	-0.0357	-2.7678	-0.9474	0.043	-1.8539
61.203	-4.4767	5.5656	0.4238	-1.0536	0.346	-0.0445	-1.5069	4.029	-24.5591		61.219	0.1727	6.8958	-0.1871	-0.0383	0.3975	-0.0348	-3.1566	5.4394	-21.2927		61.218	-0.9994	4.3658	3.8812	-0.0877	0.358	0.4318	-0.809	4.606	-29.6402		61.219	0.2639	0.9359	-0.629	-0.1087	0.1056	0.0114	-0.1111	0.6954	-12.673		61.203	-0.0357	-2.8721	-0.9409	0.0515	-1.8693
61.265	-4.3985	5.5525	0.4173	-0.9463	0.3443	-0.0445	-1.5704	3.8367	-24.3776		61.281	0.1727	6.8176	-0.1741	-0.0605	0.3821	-0.0324	-3.347	4.8624	-22.6537		61.281	-1.0124	4.3658	3.8357	-0.1065	0.3254	0.4099	-1.2531	4.5419	-29.0051		61.281	0.1987	0.9359	-0.6355	-0.1564	0.1159	0.0211	0.1427	1.3365	-12.8545		61.266	-0.0487	-2.9504	-0.9474	0.0208	-1.9003
61.328	-4.3204	5.5265	0.4108	-0.885	0.3443	-0.0057	-1.4435	3.7084	-24.7406		61.344	0.1727	6.7263	-0.1871	-0.057	0.3718	-0.0348	-2.3952	5.4394	-21.6556		61.343	-0.9994	4.3658	3.7968	-0.0775	0.3409	0.4124	-0.5552	4.4777	-29.6402		61.344	0.1206	0.9359	-0.6485	-0.1649	0.1039	0.0405	0.46	0.8877	-12.7637		61.328	-0.0617	-3.0286	-0.9604	0.0259	-1.8779
61.39	-4.2423	5.5004	0.3978	-0.7691	0.3374	-0.0397	-1.7607	4.1572	-24.6498		61.406	0.1727	6.648	-0.1676	-0.0485	0.425	-0.03	-2.1414	5.3111	-21.0205		61.406	-0.9994	4.3658	3.7773	-0.103	0.3254	0.3638	-1.2531	4.6701	-29.6402		61.406	0.0425	0.9229	-0.6615	-0.1564	0.1125	0.0502	0.0793	1.0159	-13.3081		61.391	-0.0487	-3.1199	-0.9734	0.0447	-1.9655
61.453	-4.1771	5.4743	0.3783	-0.6772	0.3203	-0.0445	-1.6973	3.5802	-24.2869		61.469	0.1727	6.5567	-0.1741	-0.0605	0.4405	-0.0251	-1.7607	4.9265	-20.5668		61.468	-0.9864	4.3528	3.7383	-0.1048	0.334	0.3492	-1.0628	4.2213	-29.8217		61.469	-0.0357	0.9359	-0.681	-0.1461	0.1159	0.0162	0.0158	0.9518	-13.2174		61.453	-0.0487	-3.1851	-0.9799	0.06	-2.0153
61.515	-4.099	5.4482	0.3523	-0.6516	0.322	-0.03	-1.0628	3.9649	-24.2869		61.531	0.1727	6.4785	-0.1676	-0.0656	0.4491	-0.0494	-0.7455	5.3111	-22.0186		61.531	-0.9994	4.3788	3.7058	-0.0911	0.3203	0.3492	-1.1262	4.4136	-29.0051		61.531	-0.1268	0.9229	-0.7005	-0.1581	0.1073	0.0235	0.2062	0.1184	-12.8545		61.516	-0.0617	-3.2764	-0.9734	0.0327	-2.1527
61.578	-4.0078	5.4091	0.3393	-0.5613	0.334	-0.0178	-1.1897	3.8367	-24.5591		61.594	0.1987	6.4002	-0.1676	-0.0383	0.3804	-0.0445	-1.9511	5.5035	-21.5649		61.593	-0.9864	4.3528	3.6668	-0.0894	0.3391	0.3224	-1.1262	4.4136	-29.6402		61.594	-0.218	0.9229	-0.7135	-0.1461	0.1262	0.043	0.3331	1.0159	-13.3081		61.578	-0.0617	-3.3546	-0.9864	0.0293	-2.163
61.64	-3.9558	5.383	0.3068	-0.5221	0.322	-0.0154	-1.3166	4.2213	-24.7406		61.656	0.1727	6.3089	-0.1676	-0.0383	0.3357	-0.0227	-2.0145	4.7983	-21.2927		61.656	-0.9734	4.3528	3.6278	-0.0894	0.322	0.3176	-0.7455	4.7983	-29.9124		61.656	-0.2831	0.9359	-0.72	-0.2211	0.1193	0.0138	-0.6821	0.503	-13.6711		61.641	-0.0748	-3.4329	-0.9994	0.0838	-2.1458
61.703	-3.8776	5.3569	0.3003	-0.4472	0.3151	-0.0251	-0.9993	4.1572	-23.3796		61.719	0.1987	6.2437	-0.1611	-0.0536	0.3546	-0.0251	-1.6973	5.3753	-21.1112		61.718	-0.9864	4.3267	3.5888	-0.0724	0.3529	0.3054	-0.6821	4.4777	-29.6402		61.719	-0.3613	0.9229	-0.7265	-0.245	0.0987	0.0114	0.7772	1.7211	-14.4877		61.703	-0.0748	-3.5242	-1.0059	0.0549	-2.2162
61.765	-3.7995	5.3308	0.2613	-0.3875	0.3203	-0.03	-2.078	3.7084	-23.924		61.781	0.1727	6.1785	-0.1481	-0.0383	0.3254	-0.047	-2.5856	4.9906	-20.6576		61.781	-0.9734	4.3528	3.5433	-0.0809	0.3237	0.286	-1.6338	4.5419	-29.7309		61.781	-0.4524	0.949	-0.733	-0.2211	0.0884	0.0114	-0.0476	0.8877	-13.8525		61.766	-0.0617	-3.5763	-1.0189	0.0566	-2.2901
61.828	-3.7213	5.3308	0.2419	-0.3381	0.3254	-0.0251	-1.8242	3.7084	-24.3776		61.844	0.1727	6.1133	-0.1611	-0.0349	0.3735	-0.0445	-2.078	4.9906	-22.1093		61.843	-0.9603	4.3397	3.5108	-0.0673	0.3306	0.2665	-0.9359	4.606	-29.5495		61.844	-0.5436	0.949	-0.759	-0.2211	0.1056	0.0138	-0.4917	0.4389	-15.6672		61.828	-0.0748	-3.6807	-1.0254	0.043	-2.3966
61.89	-3.6432	5.3308	0.2094	-0.2921	0.3203	-0.0494	-1.5069	4.029	-23.3796		61.906	0.1857	6.009	-0.1481	-0.0553	0.3804	-0.0227	-1.5069	5.1829	-21.202		61.906	-0.9603	4.3528	3.4653	-0.0656	0.3048	0.2544	-1.3166	4.0931	-30.2753		61.906	-0.6217	0.9359	-0.7785	-0.2126	0.1039	0.0235	-0.4283	0.503	-15.0321		61.891	-0.0878	-3.7459	-1.0254	0.0941	-2.424
61.953	-3.552	5.2917	0.1964	-0.2649	0.334	-0.03	-2.649	3.7726	-24.1962		61.969	0.1727	5.9177	-0.1546	-0.069	0.3701	-0.0275	-1.7607	5.1829	-20.6576		61.968	-0.9603	4.3397	3.4393	-0.0962	0.3391	0.2471	-0.6821	4.606	-30.0031		61.969	-0.6869	0.949	-0.7915	-0.2194	0.097	0.0065	0.2062	0.3748	-15.395		61.953	-0.0878	-3.8502	-1.0384	0.0566	-2.4859
62.015	-3.4739	5.2787	0.1574	-0.2274	0.3065	-0.0397	-2.1414	4.1572	-23.4703		62.031	0.1727	5.8264	-0.1546	-0.0502	0.3271	-0.03	-1.8876	4.9265	-20.6576		62.031	-0.9603	4.3528	3.3938	-0.0894	0.322	0.2131	-0.8724	4.6701	-29.9124		62.031	-0.778	0.9359	-0.798	-0.2756	0.0953	0.0041	-0.238	0.3107	-16.756		62.016	-0.0878	-3.9154	-1.0384	0.0447	-2.5013
62.078	-3.3827	5.2396	0.1249	-0.1797	0.3649	-0.0275	-1.8242	3.452	-23.6518		62.094	0.1727	5.7612	-0.1351	-0.0417	0.2911	-0.0348	-2.2683	5.5676	-21.202		62.093	-0.9603	4.3528	3.3678	-0.0588	0.3151	0.2106	-1.5069	4.9265	-30.5475		62.094	-0.8562	0.9359	-0.811	-0.2739	0.1073	0.0259	0.7138	1.1441	-16.1209		62.078	-0.0878	-3.9937	-1.0514	0.0566	-2.5408
62.14	-3.3046	5.2265	0.0794	-0.1252	0.3546	-0.0202	-2.2049	2.9392	-23.1981		62.156	0.1857	5.6699	-0.1286	-0.0536	0.2996	-0.03	-2.0145	4.9265	-21.2927		62.156	-0.9473	4.3397	3.3288	-0.0724	0.3323	0.2034	-0.9359	4.606	-30.0031		62.156	-0.9343	0.962	-0.837	-0.2739	0.0936	0.0138	0.3331	0.6313	-16.6653		62.141	-0.1138	-4.0849	-1.0644	0.0634	-2.637
62.203	-3.2264	5.1874	0.0274	-0.1269	0.3391	-0.0372	-1.5704	2.5545	-23.1074		62.219	0.1727	5.5656	-0.1286	-0.0417	0.3288	-0.0348	-1.5704	4.9906	-21.3834		62.218	-0.9473	4.3528	3.2768	-0.0741	0.334	0.2058	-0.3648	4.5419	-30.729		62.219	-1.0255	0.962	-0.8565	-0.2858	0.0644	0.0211	0.3331	0.6313	-16.5745		62.203	-0.1138	-4.1632	-1.0709	0.0702	-2.6576
62.265	-3.1613	5.1352	0.0014	-0.0979	0.334	-0.0397	-1.5069	3.1315	-22.9259		62.281	0.1727	5.5004	-0.1351	-0.0485	0.3529	-0.0372	-1.3166	5.247	-20.9298		62.281	-0.9343	4.3397	3.2508	-0.0605	0.3271	0.2034	-1.38	4.7983	-30.0939		62.281	-1.1036	0.962	-0.8565	-0.3284	0.0798	0.0089	0.46	1.2723	-16.756		62.266	-0.1268	-4.2545	-1.0839	0.0787	-2.7521
62.328	-3.0702	5.0961	-0.0376	-0.0809	0.3065	-0.0494	-1.7607	3.1315	-23.0166		62.344	0.1727	5.4091	-0.1351	-0.0417	0.3014	-0.0445	-2.5856	4.8624	-21.0205		62.343	-0.9473	4.3267	3.2054	-0.0826	0.346	0.1791	-1.1262	4.1572	-30.0031		62.344	-1.1817	0.9751	-0.8565	-0.3761	0.1314	0.0332	0.2696	1.08	-17.6634		62.328	-0.1268	-4.3327	-1.0839	0.0907	-2.8362
62.39	-2.992	5.0309	-0.0896	-0.0588	0.3563	-0.0202	-1.2531	3.1315	-23.2888		62.406	0.1727	5.3308	-0.1221	-0.0639	0.231	-0.0275	-3.2835	4.9265	-21.202		62.406	-0.9473	4.3397	3.1729	-0.0553	0.3288	0.1645	-1.1262	4.029	-30.8197		62.406	-1.2599	0.9751	-0.8565	-0.4017	0.0815	-0.0008	0.6503	1.7211	-18.0263		62.391	-0.1529	-4.411	-1.0969	0.0702	-2.8602
62.453	-2.9269	4.9787	-0.1091	-0.0366	0.358	-0.0324	-2.0145	3.3879	-22.1093		62.469	0.1857	5.2787	-0.1156	-0.0588	0.1674	-0.0397	-3.7911	4.9265	-20.9298		62.468	-0.9213	4.3528	3.1339	-0.0809	0.3237	0.1596	-0.809	4.4777	-30.4568		62.469	-1.325	0.9881	-0.863	-0.4289	0.0575	0.0138	-0.3648	1.4647	-18.2985		62.453	-0.1529	-4.4892	-1.1099	0.0651	-2.9203
62.515	-2.8357	4.9266	-0.1416	-0.0417	0.3117	-0.0275	-0.9993	3.9008	-22.9259		62.531	0.1727	5.1744	-0.0961	-0.0792	0.2052	-0.0372	-3.7277	5.1188	-20.6576		62.531	-0.9343	4.3528	3.0884	-0.0792	0.3288	0.1499	-1.2531	4.7983	-30.5475		62.531	-1.4292	0.9881	-0.876	-0.3983	0.0987	0.0381	1.4117	1.2082	-18.5707		62.516	-0.1789	-4.5544	-1.1164	0.0685	-2.9547
62.578	-2.7446	4.8353	-0.1806	-0.0247	0.3288	-0.0397	-1.4435	2.6827	-23.0166		62.594	0.1727	5.0961	-0.1026	-0.0468	0.2275	-0.0494	-1.7607	5.9522	-20.6576		62.593	-0.9213	4.3397	3.0494	-0.0315	0.3357	0.145	-1.1897	4.3495	-30.4568		62.594	-1.5073	0.9881	-0.889	-0.4	0.0901	0.0308	0.5234	0.6954	-19.478		62.578	-0.192	-4.6457	-1.1294	0.0566	-3.1075
62.64	-2.6664	4.7701	-0.2066	-0.0264	0.3409	-0.0324	-1.6973	3.0674	-22.8352		62.656	0.2118	5.0179	-0.1091	-0.0519	0.3117	-0.0275	-2.0145	4.2854	-20.7483		62.656	-0.9213	4.3528	3.0104	-0.0622	0.3254	0.1572	-1.1262	4.7983	-30.3661		62.656	-1.5725	0.9881	-0.9215	-0.4204	0.0936	0.0138	0.9041	1.08	-19.2966		62.641	-0.218	-4.724	-1.1359	0.0685	-3.1539
62.703	-2.5753	4.7309	-0.2391	-0.0179	0.3082	-0.0348	-1.38	3.9008	-22.2		62.719	0.1727	4.9527	-0.1026	-0.0519	0.3185	-0.0397	-0.6821	5.6317	-20.5668		62.718	-0.9213	4.3397	2.9584	-0.0536	0.3134	0.1402	-1.3166	4.606	-30.4568		62.719	-1.6897	1.0142	-0.9345	-0.4238	0.073	0.0235	0.6503	1.2082	-19.841		62.703	-0.218	-4.8153	-1.1489	0.0515	-3.2295
62.765	-2.5101	4.6657	-0.2586	0.0077	0.3306	-0.03	-0.809	3.1956	-22.0186		62.781	0.1727	4.8483	-0.1091	-0.0468	0.279	-0.03	-1.7607	5.6958	-21.1112		62.781	-0.9083	4.3397	2.9129	-0.0315	0.3391	0.128	-1.1262	4.2854	-30.1846		62.781	-1.7418	1.0011	-0.928	-0.4937	0.0712	-0.0057	0.3331	1.2723	-19.3873		62.766	-0.231	-4.9065	-1.1489	0.0583	-3.2192
62.828	-2.432	4.6527	-0.2781	0.0247	0.2928	-0.0251	-1.0628	3.3238	-21.9278		62.844	0.1727	4.7701	-0.1026	-0.0519	0.1915	-0.0421	-2.4587	5.1188	-20.4761		62.843	-0.8822	4.3528	2.8804	-0.0553	0.322	0.1523	-0.6186	4.4136	-31.3641		62.844	-1.8199	1.0011	-0.928	-0.5925	0.085	0.0041	0.46	1.9134	-20.2039		62.828	-0.2441	-4.9717	-1.1554	0.0515	-3.281
62.89	-2.3539	4.6005	-0.3041	0.0554	0.3306	-0.0227	-1.1262	3.0033	-22.1093		62.906	0.1597	4.6788	-0.0896	-0.0434	0.1932	-0.0421	-2.3318	4.7342	-20.7483		62.906	-0.9083	4.3528	2.8284	-0.069	0.3254	0.1256	-1.3166	5.1188	-31.2734		62.906	-1.898	1.0142	-0.928	-0.5806	0.0524	-0.0057	0.1427	1.4647	-21.202		62.891	-0.2441	-5.05	-1.1684	0.0838	-3.3617
62.953	-2.2627	4.5745	-0.3106	0.0826	0.3271	-0.0397	-1.6338	2.875	-22.2908		62.969	0.1987	4.6005	-0.0961	-0.0622	0.1743	-0.03	-1.9511	5.3753	-20.839		62.968	-0.8952	4.3528	2.7959	-0.0468	0.3271	0.1353	-0.9993	4.6701	-31.6363		62.969	-1.9762	1.0142	-0.9215	-0.5686	0.0919	0.0259	0.1427	1.5929	-20.4761		62.953	-0.2571	-5.1413	-1.1749	0.106	-3.5317
63.015	-2.1976	4.5614	-0.3301	0.0605	0.3014	-0.0251	-1.8242	3.5802	-22.3815		63.031	0.1857	4.5092	-0.0961	-0.0349	0.2155	-0.0275	-1.5704	5.3753	-20.839		63.031	-0.9083	4.3528	2.7504	-0.0588	0.3426	0.1207	-0.6821	4.8624	-31.0012		63.031	-2.0804	1.0272	-0.9409	-0.5891	0.0644	0.0162	0.3965	0.6954	-20.5668		63.016	-0.2571	-5.2195	-1.1814	0.1009	-3.6262
63.078	-2.1064	4.5353	-0.3366	0.0741	0.3391	-0.0105	-1.6338	3.1315	-22.2		63.094	0.1727	4.431	-0.0896	-0.04	0.2859	-0.0324	-0.9993	5.1829	-21.0205		63.093	-0.8952	4.3397	2.7114	-0.0213	0.3426	0.111	-1.1262	4.5419	-30.0939		63.094	-2.1585	1.0272	-0.9474	-0.5857	0.0644	-0.0032	0.7138	1.1441	-20.839		63.078	-0.2571	-5.2717	-1.1749	0.1247	-3.6537
63.14	-2.0283	4.5484	-0.3431	0.0861	0.3203	-0.0202	-1.5704	3.8367	-22.7444		63.156	0.1857	4.3788	-0.0896	-0.0434	0.1932	-0.047	-2.078	5.3753	-20.4761		63.156	-0.8822	4.3528	2.6724	-0.0196	0.3271	0.094	-1.0628	4.8624	-30.0939		63.156	-2.2236	1.0533	-0.9474	-0.6521	0.1107	0.0405	0.7772	1.7211	-22.0186		63.141	-0.2441	-5.3891	-1.1879	0.106	-3.7206
63.203	-1.9501	4.5484	-0.3495	0.0895	0.334	-0.0251	-1.1262	3.1315	-22.563		63.219	0.1597	4.2875	-0.0896	-0.0366	0.1829	-0.0445	-2.8394	4.8624	-20.4761		63.218	-0.8952	4.3397	2.6399	-0.0724	0.3391	0.1086	-1.1262	4.9265	-31.0919		63.219	-2.3018	1.0533	-0.9539	-0.722	0.0644	0.0211	0.46	1.5288	-21.8371		63.203	-0.2571	-5.4412	-1.1944	0.0992	-3.7859
63.265	-1.859	4.5353	-0.3755	0.1457	0.3288	-0.0397	-1.4435	3.1956	-22.0186		63.281	0.1857	4.2223	-0.0896	-0.0434	0.1348	-0.0251	-2.7125	4.7342	-21.1112		63.281	-0.8822	4.3397	2.5945	-0.023	0.3409	0.111	-0.7455	4.5419	-31.0012		63.281	-2.3799	1.0533	-0.9474	-0.7594	0.0884	-0.0008	0.2062	2.5545	-22.2		63.266	-0.2571	-5.5195	-1.1944	0.1094	-3.937
63.328	-1.7808	4.5223	-0.408	0.161	0.3203	-0.0397	-1.4435	2.9392	-22.8352		63.344	0.1727	4.118	-0.0766	-0.0588	0.109	-0.0421	-3.0932	5.7599	-20.9298		63.343	-0.8692	4.3397	2.562	-0.0247	0.3254	0.1061	-1.3166	4.606	-31.1827		63.344	-2.445	1.0664	-0.9539	-0.8191	0.0489	0.0114	0.7772	2.875	-22.563		63.328	-0.2441	-5.5977	-1.2074	0.0787	-4.0401
63.39	-1.6897	4.5223	-0.421	0.1338	0.2996	-0.0421	-1.3166	2.8109	-21.6556		63.406	0.1857	4.0398	-0.0701	-0.0622	0.1468	-0.0421	-3.0932	5.247	-20.6576		63.406	-0.8692	4.3397	2.523	-0.0332	0.3168	0.0843	-0.8724	4.9265	-30.729		63.406	-2.5232	1.0533	-0.9409	-0.831	0.0781	0.0211	0.5869	1.657	-22.6537		63.391	-0.2571	-5.676	-1.2074	0.1094	-4.0401
63.453	-1.5985	4.5092	-0.4145	0.1406	0.3306	-0.0445	-2.078	3.7084	-22.2		63.469	0.1727	3.9615	-0.0636	-0.0588	0.1863	-0.0494	-2.649	5.4394	-20.4761		63.468	-0.8692	4.3397	2.484	-0.0247	0.3288	0.0867	-1.5069	4.7983	-30.4568		63.469	-2.6143	1.0924	-0.9474	-0.814	0.0644	-0.0057	0.5869	1.2723	-22.2		63.453	-0.2701	-5.7673	-1.2269	0.0941	-4.2101
63.515	-1.5204	4.5092	-0.4145	0.1252	0.3323	-0.0372	-1.6338	3.3879	-22.563		63.531	0.1857	3.8963	-0.0571	-0.0366	0.1932	-0.03	-1.1897	5.3753	-21.2927		63.531	-0.8692	4.3528	2.4385	-0.0383	0.3323	0.1013	-0.4283	5.1188	-30.5475		63.531	-2.7055	1.0794	-0.9539	-0.8582	0.0919	0.0381	0.5234	1.4647	-22.4722		63.516	-0.2831	-5.8586	-1.2334	0.1384	-4.3234
63.578	-1.4422	4.5092	-0.408	0.1235	0.3409	-0.047	-1.9511	3.1956	-21.9278		63.594	0.1727	3.792	-0.0636	-0.0502	0.1279	-0.0494	-2.3318	5.5035	-21.0205		63.593	-0.8562	4.3397	2.406	-0.0332	0.3409	0.0697	-1.7607	5.0547	-31.6363		63.594	-2.7967	1.0924	-0.9539	-0.9094	0.0609	0.0259	0.9041	0.9518	-22.7444		63.578	-0.2701	-5.9368	-1.2529	0.1281	-4.4368
63.64	-1.3511	4.5092	-0.395	0.1218	0.3288	-0.0251	-2.078	3.452	-21.9278		63.656	0.1857	3.7007	-0.0571	-0.0605	0.0936	-0.047	-2.3318	5.1188	-21.0205		63.656	-0.8692	4.3397	2.3735	-0.0434	0.334	0.0745	-0.7455	4.5419	-31.5456		63.656	-2.8618	1.0794	-0.9539	-0.9792	0.0695	0.0016	0.1427	1.7211	-22.0186		63.641	-0.2831	-6.002	-1.2659	0.1366	-4.5518
63.703	-1.2469	4.5092	-0.395	0.1525	0.3117	-0.0324	-1.5704	3.452	-22.1093		63.719	0.1727	3.6355	-0.0506	-0.0639	0.097	-0.0445	-2.4587	4.8624	-20.839		63.718	-0.8431	4.3528	2.3345	-0.0332	0.3271	0.0721	-1.2531	5.0547	-30.5475		63.719	-2.9269	1.0794	-0.9474	-1.0388	0.0644	0.0259	0.46	1.657	-23.1074		63.703	-0.2831	-6.0803	-1.2854	0.1622	-4.6497
63.765	-1.1948	4.5092	-0.4015	0.1849	0.358	-0.0348	-1.5069	2.4904	-21.7464		63.781	0.1597	3.5572	-0.0441	-0.0383	0.0472	-0.0397	-2.5221	5.5676	-20.9298		63.781	-0.8562	4.3397	2.289	-0.0298	0.3477	0.0794	-2.0145	4.6701	-31.5456		63.781	-2.979	1.0794	-0.9539	-1.1053	0.0592	0.0235	0.46	1.9134	-22.4722		63.766	-0.3222	-6.1585	-1.3049	0.1656	-4.8489
63.828	-1.1166	4.4962	-0.4145	0.2002	0.3288	-0.0324	-1.38	2.1057	-21.3834		63.844	0.1727	3.4659	-0.0376	-0.0673	0.0489	-0.0324	-2.078	5.5035	-20.5668		63.843	-0.8431	4.3397	2.237	-0.0468	0.3477	0.0624	-0.4283	4.7342	-30.2753		63.844	-3.0832	1.0794	-0.9604	-1.1104	0.0919	0.0089	0.0793	1.4006	-23.2888		63.828	-0.3222	-6.2368	-1.3049	0.1588	-4.976
63.89	-1.0255	4.4962	-0.421	0.1934	0.3323	-0.0324	-1.1262	3.0033	-22.0186		63.906	0.1727	3.4007	-0.0116	-0.0519	0.03	-0.0372	-2.7759	5.3111	-20.9298		63.906	-0.8431	4.3397	2.211	-0.0502	0.3409	0.0697	-0.809	4.4777	-31.6363		63.906	-3.1613	1.0924	-0.9474	-1.1461	0.0489	0.0284	0.0793	1.9134	-23.924		63.891	-0.3482	-6.328	-1.3244	0.1861	-5.0859
63.953	-0.9603	4.4962	-0.4275	0.1934	0.346	-0.0445	-1.6338	2.6186	-21.5649		63.969	0.1597	3.3095	-0.0116	-0.0553	0.0266	-0.03	-1.6973	5.6317	-20.839		63.968	-0.8301	4.3397	2.172	-0.0588	0.346	0.0575	-0.9359	4.9906	-31.8178		63.969	-3.2395	1.0924	-0.9539	-1.1973	0.1142	0.0211	0.3331	2.1699	-23.4703		63.953	-0.3873	-6.4193	-1.3439	0.1588	-5.1683
64.015	-0.8562	4.4962	-0.4145	0.1457	0.2979	-0.0372	-2.2683	3.5161	-20.4761		64.031	0.1597	3.2312	-0.0051	-0.0519	-0.0078	-0.0494	-2.2049	5.7599	-20.6576		64.031	-0.8301	4.3528	2.1265	-0.0451	0.3357	0.06	-1.0628	4.606	-31.0919		64.031	-3.3046	1.0664	-0.9539	-1.2722	0.0695	0.0162	-0.238	1.9775	-23.1074		64.016	-0.4394	-6.4715	-1.3634	0.1298	-5.3109
64.078	-0.765	4.4832	-0.4015	0.1474	0.334	-0.0421	-1.1897	3.452	-21.9278		64.094	0.1597	3.166	-0.0051	-0.0468	-0.0404	-0.0348	-1.8876	5.0547	-21.0205		64.093	-0.8171	4.3397	2.0875	-0.0332	0.3306	0.0381	-0.9993	4.6701	-30.4568		64.094	-3.3697	1.0794	-0.9539	-1.3506	0.0661	0.0381	0.7772	1.9775	-23.1074		64.078	-0.4655	-6.5628	-1.3829	0.1315	-5.4328
64.14	-0.7129	4.4962	-0.395	0.1576	0.3409	-0.03	-1.3166	3.7084	-21.5649		64.156	0.1597	3.0878	0.0274	-0.0639	-0.0713	-0.0421	-2.5856	5.1188	-21.9278		64.156	-0.8171	4.3397	2.0485	-0.0519	0.3391	0.0502	-0.9359	4.3495	-31.3641		64.156	-3.4478	1.0924	-0.9539	-1.4051	0.1073	0.0162	0.5234	1.8493	-23.4703		64.141	-0.5045	-6.628	-1.3959	0.1196	-5.5788
64.203	-0.6087	4.4962	-0.395	0.2036	0.3357	-0.0421	-1.38	2.6186	-21.6556		64.219	0.1466	2.9834	0.0469	-0.0553	-0.1108	-0.0372	-2.9663	5.247	-21.5649		64.218	-0.8301	4.3528	2.0226	-0.0298	0.3512	0.0381	-1.5704	4.8624	-30.5475		64.219	-3.552	1.0794	-0.9539	-1.4647	0.0953	0.0187	0.0158	2.4904	-24.1962		64.203	-0.5436	-6.7193	-1.4219	0.1264	-5.7402
64.265	-0.5436	4.4832	-0.408	0.2649	0.3288	-0.047	-1.1897	2.1699	-21.4742		64.281	0.1336	2.8921	0.0664	-0.0553	-0.1348	-0.0251	-2.649	5.0547	-21.3834		64.281	-0.8041	4.3528	1.9706	-0.04	0.3168	0.0478	-0.3014	5.247	-30.9105		64.281	-3.6302	1.0924	-0.9604	-1.5397	0.1159	0.0478	-0.1745	2.2981	-23.6518		64.266	-0.5436	-6.7845	-1.4284	0.1571	-5.8913
64.328	-0.4655	4.4962	-0.434	0.2428	0.334	-0.0421	-1.8876	2.4904	-21.5649		64.344	0.1336	2.8008	0.0664	-0.069	-0.152	-0.047	-2.7125	5.247	-21.6556		64.343	-0.8171	4.3658	1.9381	-0.0332	0.3374	0.0405	-1.0628	5.247	-31.2734		64.344	-3.7083	1.0924	-0.9539	-1.601	0.1228	0.0211	-0.809	2.1699	-23.3796		64.328	-0.5566	-6.8627	-1.4414	0.1843	-6.1283
64.39	-0.3873	4.4962	-0.434	0.2479	0.3495	-0.0324	-2.078	2.8109	-21.7464		64.406	0.1206	2.7356	0.0729	-0.0298	-0.1778	-0.047	-2.2683	5.3111	-21.202		64.406	-0.791	4.3397	1.8861	-0.0281	0.3495	0.0502	-0.9993	4.5419	-30.6383		64.406	-3.7734	1.0924	-0.9539	-1.6521	0.0781	0.0381	0.3965	2.3622	-23.561		64.391	-0.5696	-6.954	-1.4609	0.1843	-6.2005
64.453	-0.3092	4.4832	-0.4275	0.2053	0.3374	-0.03	-0.809	2.5545	-21.5649		64.469	0.1076	2.6574	0.0729	-0.0366	-0.1984	-0.0372	-2.4587	5.7599	-22.4722		64.468	-0.8041	4.3397	1.8471	-0.023	0.3409	0.0284	-1.6973	5.1188	-30.9105		64.469	-3.8516	1.0924	-0.9474	-1.6879	0.121	0.0259	-1.3166	2.1699	-23.561		64.453	-0.5566	-7.0323	-1.4674	0.1861	-6.4151
64.515	-0.218	4.4962	-0.395	0.1849	0.3374	-0.0324	-1.5069	3.2597	-22.2908		64.531	0.1336	2.5791	0.0924	-0.0622	-0.2447	-0.0397	-2.0145	5.9522	-21.9278		64.531	-0.791	4.3528	1.8081	-0.0451	0.3426	0.0454	-1.1897	4.4777	-31.4549		64.531	-3.9427	1.0924	-0.9474	-1.7697	0.097	0.0332	-0.1745	2.2981	-24.3776		64.516	-0.5566	-7.0975	-1.4804	0.2355	-6.6264
64.578	-0.1399	4.4832	-0.369	0.1593	0.3254	-0.03	-1.38	2.875	-21.6556		64.594	0.1076	2.5139	0.0924	-0.0383	-0.2585	-0.0445	-2.5221	4.9265	-22.2908		64.593	-0.8041	4.3528	1.7691	-0.0417	0.3426	0.0235	-1.4435	4.4777	-31.0012		64.594	-4.0078	1.0924	-0.9604	-1.8685	0.1039	0.0235	0.0158	2.234	-23.4703		64.578	-0.5957	-7.1757	-1.4934	0.2116	-6.7569
64.64	-0.0487	4.4832	-0.3625	0.2445	0.3529	-0.0275	-0.8724	2.4904	-21.8371		64.656	0.1206	2.4096	0.0859	-0.0298	-0.3289	-0.0494	-3.1566	5.6958	-22.0186		64.656	-0.778	4.3397	1.7301	-0.0298	0.3477	0.0478	-0.6821	4.8624	-31.5456		64.656	-4.086	1.0924	-0.9539	-1.8906	0.1468	0.0187	-0.4917	2.234	-24.5591		64.641	-0.5957	-7.2409	-1.5064	0.215	-6.9286
64.703	0.0164	4.4962	-0.356	0.2598	0.3306	-0.0372	-1.5069	2.7468	-21.7464		64.719	0.1206	2.3444	0.0924	-0.0673	-0.3632	-0.0348	-3.1566	6.0804	-21.4742		64.718	-0.791	4.3397	1.6846	-0.0588	0.3426	0.0235	-0.5552	5.1188	-31.1827		64.719	-4.1641	1.0664	-0.9474	-1.9673	0.073	0.0187	0.2696	3.0033	-24.4684		64.703	-0.6348	-7.3453	-1.5129	0.2099	-7.1879
64.765	0.1076	4.4832	-0.3625	0.2683	0.3529	-0.0251	-0.809	1.9134	-22.0186		64.781	0.1206	2.2792	0.1054	-0.0639	-0.4045	-0.0348	-2.2683	5.4394	-22.563		64.781	-0.778	4.3397	1.6521	-0.0434	0.3477	0.0284	-0.8724	4.7983	-30.5475		64.781	-4.2423	1.0403	-0.9539	-2.0116	0.1245	0.0308	-1.0628	2.6827	-24.5591		64.766	-0.6608	-7.4235	-1.5259	0.2167	-7.3013
64.828	0.1987	4.4832	-0.369	0.299	0.3357	-0.0421	-1.3166	3.1956	-20.839		64.844	0.1336	2.2009	0.1054	-0.0639	-0.4354	-0.0372	-2.7759	5.4394	-22.6537		64.843	-0.765	4.3397	1.6131	-0.0434	0.334	0.0235	-0.809	5.3753	-30.9105		64.844	-4.3334	1.0272	-0.9539	-2.0593	0.1142	0.043	-0.1745	2.9392	-25.5572		64.828	-0.6869	-7.5018	-1.5323	0.1656	-7.5245
64.89	0.2769	4.4832	-0.3625	0.2939	0.3203	-0.0397	-1.6338	2.7468	-21.1112		64.906	0.0946	2.1227	0.1119	-0.0485	-0.4783	-0.0348	-2.649	5.4394	-22.4722		64.906	-0.778	4.3397	1.5806	-0.0434	0.334	0.0187	-0.6186	4.9265	-31.5456		64.906	-4.3855	1.0142	-0.9604	-2.1819	0.0283	0.0235	-0.5552	2.6827	-24.8313		64.891	-0.6869	-7.567	-1.5453	0.1843	-7.6396
64.953	0.355	4.4832	-0.356	0.2956	0.3254	-0.0348	-0.9993	2.234	-21.0205		64.969	0.1206	2.0314	0.1054	-0.0605	-0.5418	-0.0445	-2.9028	6.0804	-24.1054		64.968	-0.765	4.3397	1.5351	-0.023	0.3271	-0.0008	-1.38	5.1829	-30.6383		64.969	-4.4637	0.9881	-0.9604	-2.2637	0.0798	0.0089	-0.4283	2.6827	-25.1942		64.953	-0.7259	-7.6582	-1.5453	0.2355	-7.6774
65.015	0.4592	4.4701	-0.3106	0.2615	0.3185	-0.0421	-2.078	3.452	-21.2927		65.031	0.1076	1.9662	0.1054	-0.0468	-0.535	-0.0616	-2.3318	5.3753	-23.0166		65.031	-0.778	4.3528	1.4961	-0.04	0.3271	0.0065	-0.5552	5.3753	-30.9105		65.031	-4.5418	0.9751	-0.9604	-2.3421	0.0901	0.0138	-0.3648	4.029	-25.5572		65.016	-0.7129	-7.6713	-1.5583	0.1963	-7.4696
65.078	0.5113	4.4832	-0.2976	0.2769	0.3374	-0.0372	-0.7455	2.4904	-21.8371		65.094	0.1076	1.888	0.1054	-0.0315	-0.5745	-0.0397	-2.2049	5.3753	-23.4703		65.093	-0.765	4.3528	1.4571	-0.04	0.3615	0.0162	-0.9993	5.0547	-31.8178		65.094	-4.6069	0.962	-0.9604	-2.4579	0.0592	0.0235	0.0793	3.9649	-25.5572		65.078	-0.739	-7.6582	-1.5453	0.1656	-6.9784
65.14	0.6025	4.4571	-0.2651	0.2803	0.3203	-0.0275	-0.8724	3.1315	-21.8371		65.156	0.1076	1.8097	0.1119	-0.0468	-0.638	-0.047	-2.5856	5.1188	-23.924		65.156	-0.739	4.3658	1.4117	-0.0349	0.3495	0.0259	-0.3014	4.8624	-31.4549		65.156	-4.6981	0.9359	-0.9669	-2.4869	0.0712	0.0114	-0.4283	2.8109	-25.3757		65.141	-0.7259	-7.6191	-1.5518	0.106	-6.4203
65.203	0.6806	4.4832	-0.2521	0.3109	0.3374	-0.0251	-0.9359	3.0674	-22.0186		65.219	0.1076	1.7054	0.1249	-0.0553	-0.7222	-0.0348	-2.7125	5.7599	-24.0147		65.218	-0.7259	4.3528	1.3857	-0.0366	0.3546	-0.0105	-1.6338	4.9265	-31.0919		65.219	-4.7762	0.9229	-0.9734	-2.5448	0.1262	0.0138	-0.9359	2.6827	-24.922		65.203	-0.739	-7.5278	-1.5388	0.1247	-6.106
65.265	0.7718	4.4832	-0.2391	0.3535	0.3117	-0.047	-0.8724	2.875	-21.5649		65.281	0.0946	1.6532	0.1184	-0.0485	-0.8012	-0.0421	-3.2835	5.1829	-23.924		65.281	-0.739	4.3397	1.3467	-0.0502	0.3477	0.0259	-0.6186	4.6701	-30.9105		65.281	-4.8674	0.8838	-0.9799	-2.6436	0.0369	0.0089	-0.3648	2.875	-24.8313		65.266	-0.739	-7.4757	-1.5259	0.1213	-5.9137
65.328	0.8369	4.4701	-0.2326	0.3876	0.3357	-0.0275	-0.4283	2.1699	-22.0186		65.344	0.1076	1.5619	0.1119	-0.0605	-0.7823	-0.0324	-2.7125	5.6317	-25.4664		65.343	-0.739	4.3528	1.3142	-0.0281	0.3495	-0.0202	-0.809	4.4777	-30.5475		65.344	-4.9195	0.8707	-0.9864	-2.7628	0.0987	0.0211	-0.0476	3.3238	-25.1035		65.328	-0.7259	-7.3974	-1.5194	0.0651	-5.3624
65.39	0.9281	4.4832	-0.2131	0.3842	0.3048	-0.0397	-0.7455	2.4904	-21.3834		65.406	0.1076	1.4967	0.1314	-0.0605	-0.8063	-0.0445	-3.1566	5.4394	-25.0128		65.406	-0.739	4.3397	1.2752	-0.04	0.3443	-0.0008	-0.6821	4.9906	-31.3641		65.406	-4.9976	0.8316	-0.9864	-2.7986	0.073	0.0381	-0.4283	3.7084	-26.283		65.391	-0.739	-7.3061	-1.4999	0.0941	-5.0687
65.453	0.9671	4.4832	-0.1871	0.4182	0.3117	-0.0372	-0.6186	2.3622	-21.7464		65.469	0.0946	1.4185	0.1249	-0.069	-0.8321	-0.03	-1.8876	5.0547	-25.6479		65.468	-0.739	4.3397	1.2297	-0.04	0.3512	0.0041	-1.1262	5.1829	-31.4549		65.469	-5.0758	0.7925	-0.9864	-2.94	0.0575	0.0332	-0.4917	4.1572	-25.1035		65.453	-0.739	-7.2409	-1.4804	0.0464	-4.976
65.515	1.0843	4.4962	-0.1676	0.4251	0.3151	-0.0324	-0.6186	2.7468	-21.4742		65.531	0.0946	1.3272	0.1249	-0.0758	-0.8767	-0.0348	-2.7125	5.1188	-25.6479		65.531	-0.739	4.3397	1.1972	-0.0383	0.3254	-0.0057	-1.1262	5.0547	-30.9105		65.531	-5.1539	0.7794	-0.9994	-2.9639	0.0987	0.0211	-0.9993	2.7468	-26.8274		65.516	-0.739	-7.1757	-1.4674	0.1264	-4.6755
65.578	1.1625	4.4832	-0.1286	0.4472	0.279	-0.0421	-0.9359	3.5802	-21.7464		65.594	0.1206	1.2359	0.1249	-0.0536	-1.0364	-0.0494	-3.2201	5.247	-25.5572		65.593	-0.7129	4.3397	1.1582	-0.023	0.3237	-0.0178	-1.5704	5.3753	-30.5475		65.594	-5.2451	0.7534	-0.9994	-3.0082	0.0438	0.0235	-0.3014	2.5545	-25.9201		65.578	-0.752	-7.0844	-1.4544	0.0719	-4.4041
65.64	1.2406	4.4832	-0.0896	0.4659	0.2876	-0.0202	-0.0476	2.9392	-21.6556		65.656	0.0946	1.1707	0.1249	-0.0588	-1.0416	-0.0348	-2.649	5.4394	-26.3738		65.656	-0.7129	4.3136	1.1062	-0.0502	0.3271	-0.0032	-1.0628	5.1188	-31.0012		65.656	-5.3232	0.7273	-1.0189	-3.1427	0.0386	0.0259	-0.7455	2.7468	-26.0108		65.641	-0.7259	-7.0062	-1.4414	0.0498	-4.1998
65.703	1.3318	4.4832	-0.0766	0.4983	0.2825	-0.03	-0.9359	3.0674	-21.202		65.719	0.0946	1.0924	0.1314	-0.069	-1.1309	-0.03	-2.2049	5.3753	-26.7367		65.718	-0.7259	4.3658	1.0672	-0.0349	0.3357	-0.0081	-0.6821	4.8624	-30.729		65.719	-5.3883	0.7012	-1.0189	-3.2007	0.0489	0.0405	-0.4283	4.0931	-26.1923		65.703	-0.7129	-6.954	-1.4154	0.0617	-3.992
65.765	1.4099	4.4832	-0.0571	0.5596	0.2619	-0.047	-0.9993	2.875	-21.0205		65.781	0.0946	1.0142	0.1249	-0.0605	-1.2288	-0.0397	-3.6642	4.9265	-26.1923		65.781	-0.7129	4.3397	1.0282	-0.0315	0.3288	-0.0227	-1.1262	5.6958	-31.0012		65.781	-5.4404	0.6751	-1.0189	-3.3659	0.0129	0.0138	-0.6821	3.8367	-26.1016		65.766	-0.7129	-6.8236	-1.4089	0.0464	-3.8151
65.828	1.4881	4.4832	-0.0376	0.5988	0.2705	-0.0348	0.2696	2.875	-22.2908		65.844	0.0946	0.9099	0.1184	-0.0894	-1.2545	-0.0445	-3.0297	5.1829	-26.7367		65.843	-0.7259	4.3528	0.9892	-0.023	0.3409	-0.0154	-0.6186	5.1829	-31.4549		65.844	-5.5186	0.636	-1.0189	-3.4528	0.0798	0.0357	-0.809	3.7084	-26.4645		65.828	-0.6999	-6.7845	-1.3959	0.0378	-3.7344
65.89	1.5662	4.4832	-0.0311	0.6295	0.2636	-0.0324	-0.5552	2.6827	-22.563		65.906	0.0946	0.8316	0.1184	-0.0928	-1.3164	-0.0421	-3.347	5.6317	-26.8274		65.906	-0.6999	4.3528	0.9437	-0.0332	0.3271	-0.0397	-1.3166	5.247	-30.3661		65.906	-5.5967	0.636	-1.0319	-3.5158	0.0712	0.0357	-0.4283	3.5802	-26.9182		65.891	-0.6999	-6.6802	-1.3764	0.0532	-3.5403
65.953	1.6574	4.4701	-0.0116	0.6653	0.2481	-0.0324	-0.1111	2.7468	-23.3796		65.969	0.0946	0.7664	0.1054	-0.1048	-1.3833	-0.0324	-3.0297	4.9265	-27.3718		65.968	-0.6999	4.3528	0.9112	-0.0281	0.3288	-0.0105	-0.1745	4.8624	-31.2734		65.969	-5.7009	0.5969	-1.0319	-3.5772	0.0781	0.0284	-0.238	3.0033	-27.0996		65.953	-0.6869	-6.641	-1.3699	-0.0048	-3.3274
66.015	1.7355	4.4701	0.0014	0.6959	0.2584	-0.0397	-0.238	2.875	-23.1074		66.031	0.1076	0.7012	0.0989	-0.0962	-1.4812	-0.0202	-3.4104	5.0547	-26.9182		66.031	-0.6869	4.3528	0.8722	-0.0332	0.3203	-0.0202	-0.7455	5.3111	-30.9105		66.031	-5.766	0.5838	-1.0449	-3.6947	0.0386	0.0527	-0.3014	3.5802	-26.8274		66.016	-0.6608	-6.5497	-1.3504	0.0038	-3.2501
66.078	1.8006	4.4832	0.0079	0.7453	0.1983	-0.0445	-0.8724	3.2597	-23.561		66.094	0.1076	0.6099	0.0859	-0.0826	-1.5087	-0.0445	-2.9028	4.9265	-27.2811		66.093	-0.6869	4.3267	0.8268	-0.023	0.334	-0.0275	-0.8724	4.6701	-30.8197		66.094	-5.8442	0.5577	-1.0449	-3.831	0.018	0.0284	-0.4283	3.9649	-27.3718		66.078	-0.6869	-6.4585	-1.3439	-0.0065	-3.1144
66.14	1.8918	4.4832	0.0079	0.7641	0.2275	-0.0275	0.2062	2.8109	-23.8332		66.156	0.1076	0.5186	0.0794	-0.0894	-1.6049	-0.03	-3.5373	4.6701	-27.8255		66.156	-0.6869	4.3397	0.7813	-0.0366	0.334	-0.0227	-0.4917	4.9265	-31.3641		66.156	-5.9093	0.5447	-1.0514	-3.9792	0.0609	0.0308	-0.4283	4.3495	-27.1904		66.141	-0.6738	-6.3932	-1.3244	0.0038	-3.0715
66.203	1.9439	4.4832	0.0079	0.8254	0.1966	-0.0445	-0.8724	1.9775	-23.4703		66.219	0.1076	0.4404	0.0664	-0.0979	-1.665	-0.0445	-3.0932	4.3495	-27.8255		66.218	-0.6869	4.3397	0.7423	-0.0417	0.3391	-0.0154	-0.1111	5.1829	-30.9105		66.219	-5.9874	0.5317	-1.0579	-4.0678	0.0953	0.0357	-0.3648	4.2854	-27.1904		66.203	-0.6608	-6.315	-1.3179	0.0021	-2.9118
66.265	2.0481	4.4832	0.0144	0.8595	0.1726	-0.0397	0.3331	2.4263	-23.8332		66.281	0.1206	0.3621	0.0534	-0.1099	-1.732	-0.0251	-2.9663	4.0931	-28.9143		66.281	-0.6738	4.3528	0.7033	-0.023	0.334	-0.0251	-0.0476	4.8624	-31.1827		66.281	-6.0786	0.5056	-1.0514	-4.1479	0.121	0.0357	-0.6821	4.2213	-28.007		66.266	-0.6478	-6.2368	-1.2984	0.0038	-2.8757
66.328	2.1132	4.4701	0.0014	0.9021	0.2052	-0.0445	-0.809	1.9134	-25.0128		66.344	0.1206	0.2969	0.0339	-0.1218	-1.8161	-0.0202	-3.0932	4.606	-28.3699		66.343	-0.6738	4.3397	0.6708	-0.0383	0.346	-0.0372	-1.0628	4.9906	-31.0012		66.344	-6.1567	0.4665	-1.0644	-4.2773	0.0798	0.0138	-1.4435	3.452	-27.1904		66.328	-0.6478	-6.1455	-1.2984	0.0106	-2.728
66.39	2.2174	4.4701	0.0079	0.9344	0.176	-0.0275	-0.0476	3.1956	-25.6479		66.406	0.1206	0.2317	0.0339	-0.1201	-1.9518	-0.047	-4.5525	4.5419	-28.6421		66.406	-0.6738	4.3136	0.6383	-0.0281	0.3391	-0.0324	-1.5069	5.3111	-30.6383		66.406	-6.2088	0.4404	-1.0514	-4.371	0.0541	0.0308	-0.6186	4.1572	-28.0977		66.391	-0.6478	-6.0542	-1.2919	-0.0048	-2.6404
66.453	2.2825	4.4832	0.0014	0.9975	0.1125	-0.0445	-1.2531	2.3622	-25.8294		66.469	0.1076	0.1274	0.0209	-0.1116	-1.9981	-0.0324	-3.8546	4.0931	-28.3699		66.468	-0.6608	4.3136	0.5993	-0.0434	0.3306	-0.0445	-1.0628	5.6317	-30.0939		66.469	-6.287	0.4013	-1.0644	-4.5363	0.0455	0.0259	-0.8724	4.6701	-27.0996		66.453	-0.6608	-6.002	-1.2789	-0.0048	-2.5786
66.515	2.3737	4.4832	0.0079	1.0179	0.1502	-0.0348	-0.1111	2.234	-26.4645		66.531	0.1206	0.0622	0.0209	-0.1303	-2.072	-0.0348	-3.2835	4.9265	-29.1865		66.531	-0.6608	4.3397	0.5538	-0.057	0.334	-0.0348	-0.4283	5.8881	-30.4568		66.531	-6.3781	0.3621	-1.0709	-4.6317	0.073	0.0502	0.0158	4.7983	-26.9182		66.516	-0.6478	-5.8977	-1.2789	0.0004	-2.4773
66.578	2.4388	4.4832	0.0079	1.0758	0.085	-0.0421	-0.5552	2.1699	-26.0108		66.594	0.1466	-0.0161	0.0014	-0.115	-2.1527	-0.0421	-2.7759	5.0547	-29.4587		66.593	-0.6608	4.3397	0.5083	-0.0315	0.3323	-0.0372	-0.3014	4.9906	-31.2734		66.594	-6.4563	0.3491	-1.0644	-4.7356	0.0232	0.0357	-0.7455	4.9265	-28.2792		66.578	-0.6478	-5.8194	-1.2659	-0.0201	-2.4189
66.64	2.5299	4.4832	0.0014	1.1389	0.0661	-0.0421	0.2696	2.4904	-26.3738		66.656	0.1987	-0.1074	-0.0116	-0.1048	-2.2386	-0.0154	-3.1566	4.7983	-29.7309		66.656	-0.6608	4.3397	0.4823	-0.0298	0.334	-0.0567	-0.9359	5.247	-29.6402		66.656	-6.5214	0.323	-1.0774	-4.8514	0.0541	0.0357	-1.1262	4.4136	-28.3699		66.641	-0.6608	-5.7281	-1.2594	-0.0218	-2.3794
66.703	2.5951	4.4832	-0.0051	1.178	0.1228	-0.0397	0.0793	1.9134	-27.0996		66.719	0.2118	-0.1856	-0.0116	-0.1218	-2.3382	-0.0154	-3.9815	4.3495	-30.2753		66.718	-0.6608	4.3528	0.4303	-0.0485	0.346	-0.0348	-1.3166	5.3753	-30.4568		66.719	-6.5865	0.31	-1.0709	-4.94	0.0884	0.0308	-0.6821	4.0931	-27.9162		66.703	-0.6348	-5.6499	-1.2399	0.0038	-2.2712
66.765	2.6862	4.4701	-0.0181	1.1985	0.0575	-0.0348	-0.1111	2.4904	-26.283		66.781	0.2248	-0.2508	-0.0376	-0.086	-2.4326	-0.0324	-2.9028	5.1829	-30.1846		66.781	-0.6608	4.3397	0.3978	-0.0502	0.3409	-0.0616	-0.8724	5.1829	-29.368		66.781	-6.6646	0.2839	-1.0709	-5.0985	0.0111	0.0211	-1.8876	5.1829	-28.0977		66.766	-0.6478	-5.5847	-1.2334	-0.0218	-2.1905
66.828	2.7513	4.4832	-0.0181	1.2428	0.0541	-0.03	-0.1111	2.3622	-27.3718		66.844	0.2769	-0.3421	-0.0311	-0.1099	-2.4876	-0.03	-3.4104	5.4394	-30.2753		66.843	-0.6348	4.3528	0.3653	-0.0366	0.3443	-0.0494	-0.9993	5.6958	-29.8217		66.844	-6.7428	0.2839	-1.0774	-5.2552	0.0936	0.0381	-0.4917	5.0547	-28.1884		66.828	-0.6348	-5.5064	-1.2334	-0.0116	-2.1561
66.89	2.8165	4.4832	-0.0246	1.2666	0.0506	-0.0324	-0.6186	2.3622	-27.1904		66.906	0.2769	-0.4334	-0.0441	-0.086	-2.6112	-0.0397	-2.5856	4.2213	-29.9124		66.906	-0.6478	4.3267	0.3133	-0.0588	0.3357	-0.03	-0.9359	5.247	-29.1865		66.906	-6.8339	0.2448	-1.0774	-5.3693	0.0335	0.0332	-1.4435	4.7342	-28.3699		66.891	-0.6348	-5.4152	-1.2269	-0.003	-2.072
66.953	2.9337	4.4571	-0.0181	1.3518	0.0026	-0.0421	-0.3648	2.4904	-27.5533		66.969	0.3029	-0.4856	-0.0506	-0.1201	-2.6765	-0.0081	-3.6008	4.8624	-31.0919		66.968	-0.6348	4.3267	0.2743	-0.023	0.334	-0.0834	-1.6973	4.9906	-29.0958		66.969	-6.8991	0.2317	-1.0839	-5.4664	0.0352	0.0332	-0.9359	4.4777	-29.5495		66.953	-0.6478	-5.3499	-1.2139	-0.003	-2.0617
67.015	2.9988	4.4832	-0.0311	1.4029	0.0369	-0.0421	-0.0476	2.8109	-28.0977		67.031	0.329	-0.5638	-0.0571	-0.1218	-2.8293	-0.0421	-3.4739	4.606	-30.729		67.031	-0.6087	4.3267	0.2419	-0.0485	0.3185	-0.0494	-0.7455	5.5676	-29.2773		67.031	-6.9772	0.2187	-1.0774	-5.6368	0.0592	0.0308	-1.38	4.2854	-28.3699		67.016	-0.6348	-5.2456	-1.2074	-0.0082	-1.981
67.078	3.0639	4.4832	-0.0441	1.4813	-0.0009	-0.0372	-0.4917	2.3622	-28.007		67.094	0.342	-0.6551	-0.0701	-0.1269	-2.9478	-0.0032	-3.6642	4.5419	-31.2734		67.093	-0.6217	4.3397	0.1964	-0.0502	0.3203	-0.0737	-1.4435	5.5035	-29.2773		67.094	-7.0423	0.1665	-1.0839	-5.7288	0.0489	0.0259	-1.0628	5.1188	-29.368		67.078	-0.6348	-5.1543	-1.2009	-0.0388	-1.9535
67.14	3.142	4.4571	-0.0506	1.546	-0.0249	-0.0445	-0.6186	1.9775	-28.007		67.156	0.355	-0.7203	-0.0766	-0.1473	-3.0165	-0.0154	-3.347	3.8367	-31.3641		67.156	-0.6348	4.3397	0.1704	-0.0213	0.3426	-0.0834	-0.8724	4.6701	-29.8217		67.156	-7.1335	0.1535	-1.0839	-5.9196	0.0558	0.0332	-1.3166	5.8881	-28.6421		67.141	-0.6348	-5.1022	-1.2009	-0.0303	-1.8728
67.203	3.2202	4.4832	-0.0701	1.592	-0.0301	-0.047	-0.1111	1.8493	-29.1865		67.219	0.3811	-0.8116	-0.0896	-0.1542	-3.1814	-0.0202	-3.7911	4.2854	-30.3661		67.218	-0.6217	4.3267	0.1249	-0.0315	0.322	-0.0761	-1.2531	5.4394	-29.8217		67.219	-7.2116	0.1274	-1.0774	-6.015	0.097	0.0381	-1.2531	5.4394	-27.7348		67.203	-0.6087	-5.0109	-1.1879	-0.0184	-1.8024
67.265	3.2853	4.4832	-0.0766	1.7045	-0.0816	-0.0372	0.3331	1.9134	-29.9124		67.281	0.3811	-0.8768	-0.0831	-0.178	-3.2604	-0.0081	-3.0297	4.029	-30.8197		67.281	-0.6087	4.3397	0.0794	-0.0519	0.3357	-0.0786	-1.7607	5.1829	-28.6421		67.281	-7.2767	0.1013	-1.0839	-6.1104	0.0455	0.0478	-1.2531	4.8624	-30.1846		67.266	-0.6217	-4.9326	-1.1814	-0.0286	-1.7199
67.328	3.3895	4.4962	-0.0896	1.7624	-0.0335	-0.0324	0.3965	1.2082	-30.0031		67.344	0.3941	-0.955	-0.0896	-0.1695	-3.4373	-0.0129	-3.8546	4.0931	-30.2753		67.343	-0.6087	4.3397	0.0339	-0.0332	0.3443	-0.0664	-0.9993	4.5419	-29.7309		67.344	-7.3679	0.1013	-1.0839	-6.3063	0.0403	0.0332	-1.0628	4.3495	-29.2773		67.328	-0.6348	-4.8674	-1.1814	-0.0269	-1.677
67.39	3.4676	4.4832	-0.0961	1.8476	-0.0301	-0.0275	0.8407	1.9134	-29.9124		67.406	0.4201	-1.0463	-0.1026	-0.1899	-3.4957	-0.0081	-3.4739	4.3495	-31.4549		67.406	-0.6087	4.3397	-0.0051	-0.0502	0.3237	-0.0834	-1.3166	5.247	-29.6402		67.406	-7.433	0.0883	-1.0774	-6.4528	0.0678	0.0259	-1.8242	4.8624	-28.4606		67.391	-0.6217	-4.7761	-1.1749	-0.0473	-1.6392
67.453	3.5588	4.4832	-0.1026	1.9395	-0.1022	-0.047	0.0793	2.2981	-30.6383		67.469	0.4332	-1.1246	-0.1156	-0.178	-3.6416	-0.0251	-3.8546	3.8367	-31.0012		67.468	-0.5957	4.3397	-0.0441	-0.057	0.3203	-0.0931	-1.1262	5.5676	-29.4587		67.469	-7.4981	0.0622	-1.0839	-6.5686	0.03	0.0187	-1.5704	5.5035	-28.6421		67.453	-0.6348	-4.6979	-1.1749	-0.003	-1.6427
67.515	3.6239	4.4832	-0.1156	1.9787	-0.1074	-0.0397	0.3331	1.9134	-30.0939		67.531	0.4592	-1.2028	-0.1156	-0.1644	-3.7721	-0.03	-4.0449	3.7726	-31.6363		67.531	-0.5957	4.3267	-0.0896	-0.0196	0.334	-0.0883	-0.4283	4.9906	-29.9124		67.531	-7.5633	0.0231	-1.0904	-6.7407	0.0455	0.0478	-1.3166	4.9906	-28.0977		67.516	-0.6087	-4.6066	-1.1619	-0.0337	-1.598
67.578	3.7151	4.4832	-0.1286	2.0929	-0.0507	-0.0348	0.9676	1.4006	-29.5495		67.594	0.4853	-1.2811	-0.1221	-0.2002	-3.8426	-0.0129	-3.1566	3.9008	-31.7271		67.593	-0.5957	4.3136	-0.1286	-0.0485	0.3185	-0.0859	-1.1262	5.4394	-28.1884		67.594	-7.6284	-0.003	-1.0904	-6.8208	0.0609	0.0381	-1.4435	6.1446	-29.368		67.578	-0.6217	-4.5414	-1.1554	-0.0252	-1.4967
67.64	3.7932	4.4962	-0.1546	2.1746	-0.1125	-0.0324	1.0945	1.4006	-30.3661		67.656	0.5113	-1.3724	-0.1351	-0.195	-3.9473	-0.0129	-3.0932	3.8367	-31.0919		67.656	-0.5827	4.3267	-0.1676	-0.0349	0.3185	-0.0931	-1.4435	5.1188	-28.0977		67.656	-7.7456	-0.0422	-1.0904	-6.9349	-0.0095	0.0308	-1.0628	4.2213	-29.7309		67.641	-0.6087	-4.4501	-1.1489	-0.0354	-1.4314
67.703	3.8453	4.4962	-0.1611	2.2734	-0.1194	-0.0421	0.8407	1.4006	-30.0031		67.719	0.5504	-1.4506	-0.1416	-0.1661	-4.0692	-0.0348	-3.347	3.8367	-32.1807		67.718	-0.5566	4.3397	-0.2066	-0.0468	0.3271	-0.0883	-0.8724	5.0547	-29.2773		67.719	-7.8107	-0.0813	-1.0969	-7.0678	0.0352	0.0211	-1.5069	4.2854	-28.8236		67.703	-0.6087	-4.3719	-1.1619	0.0004	-1.3782
67.765	3.9235	4.5092	-0.1806	2.4268	-0.1022	-0.0372	0.5869	1.7852	-30.1846		67.781	0.5504	-1.5158	-0.1546	-0.1797	-4.2204	-0.0372	-4.0449	4.2854	-31.6363		67.781	-0.5696	4.3397	-0.2391	-0.0349	0.322	-0.098	-1.3166	5.247	-28.2792		67.781	-7.8888	-0.1334	-1.0904	-7.2296	-0.0146	0.0357	-1.3166	4.9906	-29.0051		67.766	-0.6087	-4.3197	-1.1424	-0.0371	-1.3301
67.828	3.9886	4.5484	-0.1936	2.4881	-0.0816	-0.0397	1.8559	0.7595	-30.6383		67.844	0.5504	-1.6071	-0.1611	-0.1882	-4.3904	0.0016	-4.0449	4.2854	-31.9085		67.843	-0.5827	4.3397	-0.2976	-0.0298	0.3203	-0.0931	-1.3166	5.1188	-28.2792		67.844	-7.954	-0.1334	-1.0904	-7.354	0.0214	0.0478	-0.809	5.6317	-28.9143		67.828	-0.5957	-4.2154	-1.1359	-0.0354	-1.3112
67.89	4.0797	4.5484	-0.2326	2.5971	-0.0576	-0.0445	2.0462	1.2082	-30.3661		67.906	0.6025	-1.6723	-0.1741	-0.2036	-4.4986	0.0041	-3.4739	3.8367	-31.9993		67.906	-0.5696	4.3397	-0.3236	-0.04	0.3168	-0.098	-1.38	5.3111	-27.7348		67.906	-8.0191	-0.1595	-1.0904	-7.5056	0.0438	0.0381	-1.6338	5.824	-28.5514		67.891	-0.5957	-4.1241	-1.1359	-0.0422	-1.2975
67.953	4.1449	4.6005	-0.2456	2.7198	-0.1022	-0.0494	0.6503	1.3365	-31.2734		67.969	0.6025	-1.7375	-0.1806	-0.2104	-4.6051	-0.0057	-3.2835	3.7726	-32.1807		67.968	-0.5696	4.3397	-0.369	-0.0468	0.3271	-0.0907	-1.5704	4.7342	-27.5533		67.969	-8.1233	-0.1726	-1.0904	-7.6862	0.0369	0.0478	-2.078	5.3753	-30.5475		67.953	-0.5957	-4.0458	-1.1229	-0.0235	-1.2339
68.015	4.236	4.6527	-0.2651	2.8084	-0.0885	-0.0372	1.4117	1.3365	-31.0012		68.031	0.6025	-1.8288	-0.1806	-0.2189	-4.7854	-0.0057	-3.6642	3.7726	-31.5456		68.031	-0.5696	4.3397	-0.408	-0.0366	0.3134	-0.098	-1.6338	4.5419	-27.7348		68.031	-8.1623	-0.1856	-1.0904	-7.3949	0.042	0.0308	-1.9511	2.1699	-28.6421		68.016	-0.5827	-3.9415	-1.1229	-0.0405	-1.1652
68.078	4.3272	4.6788	-0.2781	2.9106	-0.0644	-0.0324	1.2214	1.657	-31.1827		68.094	0.6155	-1.9071	-0.1936	-0.2308	-4.9073	-0.0032	-3.4104	3.1315	-31.8178		68.093	-0.5566	4.3397	-0.4535	-0.0366	0.3271	-0.0883	-0.6821	5.1188	-28.3699		68.094	-8.1623	-0.1856	-1.1034	-7.3676	0.0592	0.0551	-1.0628	3.0674	-28.4606		68.078	-0.6087	-3.8893	-1.1164	-0.049	-1.1773
68.14	4.3923	4.7309	-0.3106	3.0452	-0.0902	-0.0372	1.0945	1.4006	-31.7271		68.156	0.6285	-1.9853	-0.1936	-0.2308	-5.0584	-0.0348	-4.1084	3.3238	-32.1807		68.156	-0.5696	4.3528	-0.486	-0.023	0.3271	-0.1223	-1.1897	5.1188	-27.644		68.156	-8.1493	-0.2117	-1.1034	-6.8531	0.0043	0.0235	-1.3166	3.5802	-21.7464		68.141	-0.5957	-3.8111	-1.1164	-0.0337	-1.1446
68.203	4.4965	4.7701	-0.3366	3.2053	-0.0868	-0.0445	0.46	1.1441	-31.2734		68.219	0.6415	-2.0505	-0.2261	-0.2155	-5.1769	-0.0008	-3.7277	3.5802	-31.9993		68.218	-0.5566	4.3267	-0.538	-0.0451	0.3117	-0.132	-1.6338	4.9265	-27.8255		68.219	-8.0581	-0.2247	-1.1034	-6.6811	-0.0146	0.0211	-1.2531	3.2597	-20.7483		68.203	-0.5957	-3.7198	-1.1164	-0.0252	-1.088
68.265	4.5616	4.8353	-0.3625	3.3467	-0.0198	-0.047	0.3965	0.9518	-30.3661		68.281	0.6806	-2.1418	-0.2326	-0.2155	-5.2662	-0.0032	-4.2353	3.0674	-31.8178		68.281	-0.5566	4.3397	-0.577	-0.0128	0.3409	-0.1272	-0.5552	4.9906	-27.3718		68.281	-8.0061	-0.2247	-1.1034	-6.4971	0.0232	0.0162	-1.0628	4.9906	-18.8429		68.266	-0.5827	-3.6415	-1.1034	-0.0542	-1.0656
68.328	4.6528	4.8483	-0.3755	3.4932	-0.1056	-0.0348	0.5869	1.1441	-31.8178		68.344	0.6936	-2.2331	-0.2391	-0.178	-5.4311	-0.0057	-3.8546	3.3238	-32.5437		68.343	-0.5566	4.3528	-0.616	-0.0145	0.3185	-0.1418	-1.2531	5.3111	-27.4626		68.344	-7.9279	-0.2247	-1.1034	-6.2603	0.0008	0.0357	-0.238	3.2597	-18.5707		68.328	-0.5827	-3.5633	-1.1034	-0.0473	-1.0038
68.39	4.7179	4.8744	-0.4015	3.592	-0.0473	-0.03	0.9041	0.8236	-31.6363		68.406	0.7457	-2.2983	-0.2456	-0.1882	-5.5822	-0.0032	-3.6008	4.3495	-31.9085		68.406	-0.5436	4.3397	-0.6615	-0.023	0.3306	-0.1393	-1.38	5.0547	-27.0089		68.406	-7.9019	-0.2378	-1.1034	-5.7117	-0.0232	0.0211	0.3331	-0.0098	-17.4819		68.391	-0.5957	-3.4981	-1.0904	-0.0235	-0.9798
68.453	4.783	4.8744	-0.4275	3.73	-0.1039	-0.0421	0.2696	1.3365	-30.8197		68.469	0.7718	-2.3765	-0.2586	-0.1967	-5.6423	0.0065	-2.5221	3.5161	-32.5437		68.468	-0.5566	4.3397	-0.7005	-0.0179	0.3185	-0.1369	-1.8242	5.1188	-27.1904		68.469	-7.8107	-0.2247	-1.1034	-5.647	0.0283	0.0357	0.46	0.503	-16.8467		68.453	-0.5827	-3.4068	-1.0969	-0.0201	-0.9145
68.515	4.8742	4.8874	-0.447	3.9123	-0.1228	-0.0397	0.2696	0.5672	-30.9105		68.531	0.7848	-2.4417	-0.2651	-0.2155	-5.8467	-0.0154	-4.4256	3.3879	-32.9066		68.531	-0.5306	4.3267	-0.746	-0.0264	0.3374	-0.132	-1.2531	4.6701	-27.2811		68.531	-7.7195	-0.2117	-1.1099	-5.6351	-0.0421	0.0381	0.0793	3.7084	-14.4877		68.516	-0.5566	-3.3286	-1.0969	-0.0576	-0.8699
68.578	4.9263	4.8744	-0.473	4.0827	-0.0782	-0.0372	1.4752	0.6313	-31.1827		68.594	0.7978	-2.52	-0.2781	-0.2274	-6.0442	-0.0057	-4.2987	3.5161	-32.3622		68.593	-0.5306	4.3397	-0.7785	-0.0536	0.3306	-0.1393	-1.3166	5.247	-27.0996		68.594	-7.6414	-0.2117	-1.1099	-5.3421	0.006	0.0478	1.1579	3.1315	-15.1228		68.578	-0.5696	-3.2633	-1.0904	-0.0269	-0.8424
68.64	5.0174	4.8744	-0.499	4.2377	-0.0868	-0.0421	1.3483	0.503	-31.4549		68.656	0.8239	-2.5982	-0.2846	-0.2206	-6.2537	0.0235	-5.3773	2.8109	-32.09		68.656	-0.5306	4.3267	-0.8175	-0.0298	0.31	-0.1393	-1.5069	5.3111	-27.2811		68.656	-7.5763	-0.2117	-1.1164	-5.061	-0.006	0.0235	-0.3014	1.0159	-15.1228		68.641	-0.5566	-3.1721	-1.0774	-0.0576	-0.808
68.703	5.0956	4.8744	-0.5185	4.3569	-0.073	-0.0397	0.7138	0.503	-31.0919		68.719	0.8239	-2.6634	-0.2911	-0.2666	-6.3997	0.0138	-4.5525	3.0033	-32.9973		68.718	-0.5566	4.3397	-0.8565	-0.04	0.3203	-0.1539	-1.4435	5.3753	-26.7367		68.719	-7.5242	-0.2247	-1.1034	-4.7969	-0.0421	0.0235	0.5234	0.1825	-15.3043		68.703	-0.5827	-3.0808	-1.0774	-0.0627	-0.7926
68.765	5.1607	4.8744	-0.551	4.5443	-0.0799	-0.0445	0.6503	0.5672	-30.8197		68.781	0.8239	-2.7547	-0.2976	-0.2853	-6.4529	0.0041	-4.3622	2.5545	-32.9973		68.781	-0.5176	4.3397	-0.889	-0.0298	0.3134	-0.1588	-1.4435	4.8624	-26.8274		68.781	-7.4591	-0.2117	-1.1099	-4.6998	0.0008	0.0308	0.7138	1.1441	-14.2155		68.766	-0.5696	-2.9895	-1.0644	-0.0712	-0.7668
68.828	5.2388	4.8483	-0.5705	4.6925	-0.0988	-0.047	1.1579	0.4389	-31.0919		68.844	0.8499	-2.833	-0.3106	-0.241	-6.5903	0.0162	-3.347	3.452	-32.4529		68.843	-0.5176	4.3397	-0.9215	-0.0366	0.3271	-0.1588	-1.5069	5.3111	-26.9182		68.844	-7.3679	-0.1856	-1.1099	-4.5857	-0.0146	0.0187	-0.1111	1.3365	-13.8525		68.828	-0.5696	-2.9243	-1.0709	-0.0473	-0.6913
68.89	5.3039	4.8614	-0.5965	4.868	-0.1142	-0.03	1.3483	0.2466	-31.5456		68.906	0.889	-2.9112	-0.3301	-0.2019	-6.7706	-0.0032	-4.4891	3.3238	-33.0881		68.906	-0.5176	4.3267	-0.9604	-0.0451	0.322	-0.1515	-1.1897	5.5035	-26.3738		68.906	-7.2898	-0.1726	-1.1164	-4.538	-0.0009	0.0502	0.3965	2.234	-13.7618		68.891	-0.5566	-2.846	-1.0579	-0.061	-0.6432
68.953	5.3691	4.8874	-0.6225	5.0792	-0.0455	-0.0445	1.3483	0.6313	-31.8178		68.969	0.915	-2.9895	-0.3236	-0.1882	-6.9423	0.0284	-4.7429	3.452	-32.3622		68.968	-0.5176	4.3397	-0.9994	-0.0315	0.3254	-0.1442	-0.9359	4.8624	-26.3738		68.969	-7.2246	-0.1465	-1.1164	-4.3438	0.0197	0.0405	0.0158	2.234	-13.3989		68.953	-0.5566	-2.7678	-1.0514	-0.0371	-0.6088
69.015	5.4602	4.9005	-0.642	5.2496	-0.1142	-0.03	1.1579	0.3107	-32.3622		69.031	0.9281	-3.0677	-0.3431	-0.1814	-7.1038	0.0211	-4.4891	3.7084	-32.8159		69.031	-0.5176	4.3397	-1.0384	-0.0366	0.3168	-0.1709	-1.5704	4.9906	-26.283		69.031	-7.1335	-0.1074	-1.1099	-4.1053	-0.0043	0.0381	0.0158	0.6954	-13.6711		69.016	-0.5566	-2.7026	-1.0514	-0.0507	-0.6054
69.078	5.5253	4.9005	-0.6745	5.3637	-0.0782	-0.0372	1.2214	0.2466	-32.09		69.094	0.9671	-3.146	-0.3625	-0.2393	-7.3373	0.0065	-4.5525	4.2854	-33.3603		69.093	-0.5045	4.3267	-1.0709	-0.0281	0.322	-0.1588	-1.0628	4.9906	-26.8274		69.094	-7.0814	-0.1074	-1.1229	-4.0133	-0.0043	0.0405	0.3331	0.6313	-14.3969		69.078	-0.5566	-2.6113	-1.0449	-0.032	-0.5659
69.14	5.5905	4.9135	-0.694	5.5256	-0.0936	-0.0494	0.7138	0.1184	-31.5456		69.156	0.9801	-3.2242	-0.3755	-0.2325	-7.5365	0.0041	-5.2504	3.3238	-32.9973		69.156	-0.5045	4.3267	-1.1034	-0.0451	0.3185	-0.1563	-0.9993	5.3111	-25.9201		69.156	-7.0032	-0.0813	-1.1164	-3.8719	-0.0095	0.0308	0.8407	1.1441	-13.4896		69.141	-0.5566	-2.5591	-1.0384	-0.0507	-0.5539
69.203	5.6556	4.9135	-0.72	5.7351	-0.1262	-0.0324	0.9041	-0.0739	-31.8178		69.219	0.9801	-3.3025	-0.3755	-0.2172	-7.5932	0.0041	-3.918	3.3879	-32.9973		69.218	-0.5176	4.3528	-1.1359	-0.0332	0.2893	-0.1977	-1.6338	4.7983	-25.5572		69.219	-6.9121	-0.0682	-1.1164	-3.7339	-0.0387	0.0405	0.8407	1.7852	-13.3081		69.203	-0.5436	-2.4678	-1.0319	-0.0729	-0.5041
69.265	5.7467	4.9135	-0.733	5.8663	-0.0146	-0.0348	1.5386	-0.715	-31.6363		69.281	1.0062	-3.3807	-0.3885	-0.2359	-7.5846	0.0089	-2.9663	3.5802	-32.3622		69.281	-0.4915	4.3267	-1.1749	-0.0485	0.3014	-0.1879	-0.809	5.3753	-25.4664		69.281	-6.8209	-0.0552	-1.1099	-3.5755	-0.0335	0.0308	0.7772	1.9775	-14.3969		69.266	-0.5436	-2.4026	-1.0319	-0.0763	-0.4732
69.328	5.7988	4.9135	-0.759	6.0929	-0.0782	-0.064	0.0158	-0.4586	-32.3622		69.344	1.0062	-3.4068	-0.395	-0.1746	-7.4747	0.0284	-2.5221	3.3879	-33.8139		69.343	-0.5045	4.3397	-1.2139	-0.0656	0.2876	-0.1879	-0.8724	5.5676	-25.1942		69.344	-6.7558	-0.0291	-1.1099	-3.5431	0.0335	0.0308	0.6503	2.1057	-12.1286		69.328	-0.5436	-2.3113	-1.0319	-0.0644	-0.4337
69.39	5.89	4.9396	-0.7785	6.2598	-0.1194	-0.0445	0.0793	-0.138	-31.5456		69.406	1.0062	-3.3938	-0.395	-0.1337	-7.0213	-0.0008	-1.3166	3.1956	-32.5437		69.406	-0.4785	4.3267	-1.2594	-0.0281	0.2911	-0.1952	-0.5552	5.3753	-25.5572		69.406	-6.6907	0.0231	-1.1164	-3.3012	-0.0078	0.0187	1.3483	0.3748	-12.5823		69.391	-0.5436	-2.2461	-1.0189	-0.0439	-0.4199
69.453	5.9681	4.9266	-0.798	6.4063	-0.0335	-0.0348	1.1579	-0.4586	-31.4549		69.469	1.0322	-3.3546	-0.395	-0.1593	-6.5216	-0.0154	-0.5552	4.2213	-31.2734		69.468	-0.4785	4.3528	-1.2984	-0.0673	0.2928	-0.1977	-1.3166	5.3753	-24.7406		69.469	-6.6256	0.0491	-1.1229	-3.2416	0.0008	0.0016	0.3331	0.8877	-12.8545		69.453	-0.5306	-2.1679	-1.0124	-0.0422	-0.3323
69.515	6.0333	4.9266	-0.8305	6.5494	-0.1194	-0.0372	0.46	-0.2663	-32.8159		69.531	1.0062	-3.2894	-0.382	-0.1899	-6.6006	0.0114	-4.1718	4.6701	-30.0031		69.531	-0.4655	4.3267	-1.3374	-0.0332	0.31	-0.2171	-1.6338	4.9265	-24.922		69.531	-6.5474	0.1013	-1.1229	-3.1598	0.0249	0.0187	0.5234	1.2082	-12.4915		69.516	-0.5306	-2.0896	-1.0124	-0.0371	-0.2928
69.578	6.0984	4.9396	-0.8435	6.7488	0.0026	-0.0421	1.3483	-0.7791	-31.8178		69.594	1.0192	-3.2112	-0.369	-0.0911	-6.1987	-0.0057	-3.9815	4.9906	-29.0958		69.593	-0.4655	4.3397	-1.3764	-0.0417	0.3014	-0.2195	-1.7607	4.5419	-25.5572		69.594	-6.4693	0.1404	-1.1164	-3.0456	0.0197	0.0089	-0.1111	1.08	-13.1267		69.578	-0.5306	-2.0114	-1.0124	-0.0371	-0.334
69.64	6.1765	4.9266	-0.8695	6.9617	-0.0988	-0.0445	0.8407	-0.5227	-31.3641		69.656	1.0322	-3.1329	-0.356	-0.0877	-5.6801	-0.0202	-1.7607	5.1829	-28.1884		69.656	-0.4655	4.3397	-1.4154	-0.0673	0.279	-0.2122	-1.8876	5.1829	-24.7406		69.656	-6.3911	0.1926	-1.1229	-2.9247	0.0455	0.0065	-0.238	0.5672	-10.9491		69.641	-0.5045	-1.9201	-1.0124	-0.0559	-0.3323
69.703	6.2677	4.9396	-0.8955	7.2104	-0.1366	-0.0567	0.2696	-0.5868	-32.5437		69.719	1.0062	-3.0547	-0.3495	-0.1116	-5.6286	-0.0032	-2.8394	5.6317	-28.1884		69.718	-0.4524	4.3397	-1.4479	-0.0553	0.2773	-0.2268	-1.3166	4.9906	-24.5591		69.719	-6.313	0.2187	-1.1229	-2.785	0.0524	0.0284	0.1427	0.0543	-12.2193		69.703	-0.5045	-1.8549	-1.0059	-0.0559	-0.3392
69.765	6.3458	4.9527	-0.9215	7.3178	0.0403	-0.047	1.4117	-0.8432	-31.9085		69.781	1.0062	-2.9764	-0.3366	-0.1099	-5.2387	-0.0032	-1.38	4.6701	-28.0977		69.781	-0.4655	4.3397	-1.4804	-0.0553	0.2911	-0.2487	-1.7607	5.1829	-24.6498		69.781	-6.2479	0.2317	-1.1164	-2.6692	0.0043	0.0284	0.3965	0.3107	-12.3101		69.766	-0.4785	-1.7636	-0.9929	-0.0559	-0.2739
69.828	6.4109	4.9396	-0.9409	7.546	-0.0455	-0.0372	0.7138	-0.138	-32.5437		69.844	0.9932	-2.9112	-0.3236	-0.1082	-4.9554	-0.0154	-0.809	5.247	-26.283		69.843	-0.4524	4.3397	-1.5323	-0.0366	0.2722	-0.2608	-1.8242	5.1188	-24.6498		69.844	-6.1697	0.2317	-1.1229	-2.5669	0.0661	0.0114	0.2062	-0.0098	-12.4915		69.828	-0.4915	-1.6593	-0.9929	-0.0678	-0.1864
69.89	6.5021	4.9396	-0.9539	7.776	-0.1022	-0.0348	0.6503	-0.0739	-31.4549		69.906	0.9541	-2.8199	-0.2976	-0.0996	-4.9125	-0.03	-2.9663	4.7342	-25.9201		69.906	-0.4655	4.3528	-1.5583	-0.0451	0.2945	-0.2511	-1.2531	5.0547	-24.5591		69.906	-6.0786	0.2448	-1.1164	-2.5278	0.0094	0.0551	1.0945	1.0159	-11.6749		69.891	-0.4915	-1.5941	-0.9929	-0.0405	-0.0833
69.953	6.5412	4.9527	-0.9669	7.6976	-0.0369	-0.0372	0.9041	0.0543	-31.1827		69.969	0.9541	-2.7417	-0.2911	-0.1048	-4.6497	-0.0105	-2.078	4.9906	-25.7386		69.968	-0.4524	4.3267	-1.5908	-0.0468	0.2996	-0.2754	-1.1897	5.3753	-24.6498		69.969	-6.0135	0.2578	-1.1229	-2.4409	0.0043	-0.0008	1.031	0.8236	-13.0359		69.953	-0.4785	-1.4897	-0.9864	-0.0661	-0.1262
70.015	6.5672	4.9527	-0.9669	7.4421	-0.0266	-0.0348	0.5234	1.4647	-31.3641		70.031	0.9281	-2.6634	-0.2781	-0.103	-4.3595	-0.0397	-1.3166	5.5035	-25.0128		70.031	-0.4394	4.3397	-1.6363	-0.0366	0.2928	-0.2949	-2.0145	5.1829	-24.1054		70.031	-5.9353	0.2578	-1.1164	-2.2739	0.0352	0.0016	1.2214	0.7595	-12.3101		70.016	-0.4655	-1.4115	-0.9799	-0.0542	-0.1692
70.078	6.5542	4.9396	-0.9604	6.9804	0.1228	-0.0543	1.6021	2.9392	-30.6383		70.094	0.915	-2.5852	-0.2781	-0.086	-4.2083	-0.0348	-1.1897	5.3753	-25.3757		70.093	-0.4394	4.3397	-1.6753	-0.0366	0.2756	-0.2997	-1.6338	4.7983	-24.3776		70.094	-5.8702	0.2839	-1.1164	-2.187	-0.0181	-0.0105	0.5869	0.3748	-12.1286		70.078	-0.4524	-1.3463	-0.9669	-0.0593	-0.2533
70.14	6.4891	4.9527	-0.9409	6.7113	-0.1589	-0.0421	-0.238	2.7468	-29.6402		70.156	0.889	-2.52	-0.2586	-0.1082	-4.0418	-0.0372	-2.2049	5.6317	-24.8313		70.156	-0.4264	4.3397	-1.7143	-0.0417	0.2945	-0.2803	-1.1262	5.1829	-24.8313		70.156	-5.7921	0.2969	-1.1164	-2.0967	0.0386	0.0332	1.031	0.0543	-11.8564		70.141	-0.4524	-1.255	-0.9669	-0.078	-0.1245
70.203	6.4109	4.9527	-0.9085	6.4677	-0.0026	-0.047	-0.1111	0.6954	-28.8236		70.219	0.8499	-2.4548	-0.2391	-0.1048	-3.7739	-0.0178	-0.8724	5.1829	-24.4684		70.218	-0.4264	4.3397	-1.7468	-0.0553	0.3151	-0.2997	-1.0628	5.1188	-24.3776		70.219	-5.7139	0.336	-1.1164	-2.0013	0.0592	0.0016	0.6503	0.1825	-11.4935		70.203	-0.4524	-1.1637	-0.9539	-0.0133	-0.0043
70.265	6.3458	4.9527	-0.8955	6.0827	0.0146	-0.0543	0.5869	2.0416	-28.2792		70.281	0.8369	-2.3765	-0.2261	-0.0826	-3.6485	-0.03	-1.2531	5.0547	-23.561		70.281	-0.4134	4.3267	-1.7923	-0.0502	0.2928	-0.324	-1.1262	5.3111	-24.6498		70.281	-5.6228	0.3621	-1.1099	-1.9605	-0.006	0.0138	0.5234	0.1825	-12.0379		70.266	-0.4394	-1.0985	-0.9539	-0.0405	0.0129
70.328	6.2547	4.9527	-0.8825	5.7164	-0.0593	-0.0421	-0.3648	3.5161	-27.9162		70.344	0.8108	-2.3113	-0.2131	-0.1201	-3.4355	-0.0397	-0.6186	4.6701	-23.4703		70.343	-0.4134	4.3267	-1.8183	-0.057	0.2825	-0.3313	-1.7607	5.0547	-24.1054		70.344	-5.5316	0.3882	-1.1034	-1.8957	0.0627	0.0162	0.7138	0.2466	-10.6769		70.328	-0.4524	-1.0333	-0.9539	-0.0422	0.0077
70.39	6.2026	4.9527	-0.8565	5.5171	0.0489	-0.0591	0.3331	3.3238	-27.0996		70.406	0.7848	-2.22	-0.2066	-0.0996	-3.2363	-0.0445	-0.238	5.1829	-23.1981		70.406	-0.4003	4.3397	-1.8573	-0.0707	0.2962	-0.3581	-1.1262	5.0547	-23.924		70.406	-5.4795	0.4143	-1.0969	-1.7782	0.0678	0.0308	0.46	-0.2663	-10.8583		70.391	-0.4394	-0.9159	-0.9474	-0.0405	-0.0078
70.453	6.1505	4.9527	-0.824	5.3058	0.0661	-0.0567	-0.1111	3.3879	-27.1904		70.469	0.7587	-2.1548	-0.1871	-0.0979	-3.1385	-0.047	-0.9359	4.8624	-22.563		70.468	-0.4003	4.3136	-1.8963	-0.057	0.2756	-0.3702	-1.5704	5.247	-23.6518		70.469	-5.4014	0.4404	-1.0904	-1.6896	0.03	0.0211	0.6503	-0.4586	-11.312		70.453	-0.4394	-0.8507	-0.9539	-0.0542	0.0026
70.515	6.0593	4.9527	-0.8045	4.9855	0.0111	-0.0445	0.2696	3.1315	-26.1923		70.531	0.7327	-2.0635	-0.1676	-0.0741	-3.1144	-0.0397	-2.5856	5.247	-23.0166		70.531	-0.4003	4.3528	-1.9288	-0.0417	0.2739	-0.3824	-2.078	4.9906	-23.8332		70.531	-5.3232	0.4534	-1.0969	-1.6317	0.0747	0.0187	0.7772	0.1825	-11.312		70.516	-0.4524	-0.7725	-0.9409	-0.0439	0.0094
70.578	6.0072	4.9657	-0.7785	4.931	0.0077	-0.0616	-0.3014	3.5802	-26.646		70.594	0.7197	-1.9592	-0.1741	-0.0502	-2.9427	-0.0494	-2.649	6.0804	-22.9259		70.593	-0.4003	4.3397	-1.9613	-0.0724	0.2876	-0.414	-0.809	5.1188	-23.7425		70.594	-5.2711	0.4665	-1.0904	-1.5789	0.0901	0.0187	0.3965	0.0543	-11.312		70.578	-0.4394	-0.7073	-0.9345	-0.0235	0.0438
70.64	5.916	4.9657	-0.7655	4.6857	0.0214	-0.0348	0.5869	3.8367	-26.1016		70.656	0.6936	-1.9071	-0.1546	-0.0349	-2.7727	-0.0372	-1.1262	5.5676	-22.1093		70.656	-0.3873	4.3397	-1.9873	-0.0519	0.2773	-0.4358	-2.2049	4.4777	-23.7425		70.656	-5.193	0.5186	-1.0774	-1.5533	0.0609	0.0284	1.6655	0.4389	-10.5861		70.641	-0.4524	-0.616	-0.928	-0.0678	0.0919
70.703	5.8509	4.9657	-0.733	4.3774	0.0438	-0.0251	0.5869	4.7342	-27.2811		70.719	0.6806	-1.8158	-0.1546	-0.0605	-2.5786	-0.0372	-0.4917	5.0547	-23.2888		70.718	-0.3743	4.3397	-2.0328	-0.0468	0.2756	-0.4528	-1.38	5.1829	-23.8332		70.719	-5.0888	0.5447	-1.0774	-1.4375	0.0266	-0.0032	0.3965	-0.2021	-11.1305		70.703	-0.4394	-0.5116	-0.9345	-0.0712	0.1228
70.765	5.7858	4.9787	-0.7135	4.2479	0.0094	-0.0372	-0.9359	4.606	-26.8274		70.781	0.6546	-1.7375	-0.1351	-0.0707	-2.503	-0.0421	-0.4917	4.9265	-22.563		70.781	-0.3873	4.3267	-2.0783	-0.0536	0.2653	-0.4626	-1.6973	4.606	-23.561		70.781	-5.0107	0.5447	-1.0709	-1.3676	0.0592	0.0284	0.5234	-0.2021	-10.9491		70.766	-0.4524	-0.4464	-0.9215	-0.0235	0.2395
70.828	5.6946	4.9657	-0.681	4.0639	0.0712	-0.0494	0.5869	3.9649	-25.6479		70.844	0.6155	-1.6854	-0.1221	-0.0843	-2.4618	-0.0421	-1.5704	4.7983	-22.1093		70.843	-0.3743	4.3528	-2.1173	-0.0622	0.2979	-0.5014	-1.6338	4.6701	-23.8332		70.844	-4.9455	0.5838	-1.0774	-1.3455	0.0541	0.0089	1.2848	-0.0739	-10.3139		70.828	-0.4524	-0.3682	-0.9215	-0.0661	0.2241
70.89	5.6295	4.9657	-0.655	3.793	0.0936	-0.0421	0.1427	4.2854	-25.1942		70.906	0.5894	-1.581	-0.1026	-0.0945	-2.4137	-0.03	-1.6973	5.3753	-22.4722		70.906	-0.3613	4.3397	-2.1497	-0.069	0.2842	-0.516	-1.38	5.0547	-23.3796		70.906	-4.8804	0.5969	-1.0709	-1.2569	0.0506	0.0138	0.3965	-0.3304	-10.4047		70.891	-0.4394	-0.2899	-0.915	-0.0644	0.1399
70.953	5.5644	4.9787	-0.629	3.6653	0.0438	-0.047	-0.3648	3.3879	-24.8313		70.969	0.5634	-1.5028	-0.1091	-0.0843	-2.2763	-0.0494	-2.3318	5.6317	-21.1112		70.968	-0.3613	4.3267	-2.1887	-0.0826	0.2636	-0.5452	-1.1897	4.0931	-23.1981		70.969	-4.7893	0.5969	-1.0644	-1.1973	0.0283	0.0138	0.6503	0.1825	-11.4935		70.953	-0.4394	-0.1986	-0.9215	-0.0559	0.0936
71.015	5.4732	4.9657	-0.603	3.4864	0.0833	-0.0543	-0.1745	3.8367	-25.5572		71.031	0.5504	-1.4245	-0.0961	-0.0366	-2.0909	-0.0445	-0.4917	5.824	-22.2908		71.031	-0.3613	4.3397	-2.2277	-0.0792	0.2705	-0.5865	-1.2531	4.2854	-23.3796		71.031	-4.7111	0.5969	-1.0579	-1.124	0.0129	0.0065	0.9676	-0.5227	-10.4954		71.016	-0.4394	-0.1074	-0.9085	-0.0695	0.1176
71.078	5.4081	4.9657	-0.5705	3.2445	0.0609	-0.0445	0.3331	4.606	-25.285		71.094	0.5504	-1.3593	-0.0896	-0.0162	-1.902	-0.0324	0.46	5.5035	-22.0186		71.093	-0.3352	4.3267	-2.2667	-0.0843	0.2756	-0.6181	-1.1262	4.029	-23.0166		71.094	-4.6199	0.6099	-1.0644	-1.0678	0.0592	0.0138	1.3483	-0.3945	-10.9491		71.078	-0.4394	-0.0422	-0.9085	-0.0439	0.1915
71.14	5.33	4.9787	-0.5445	3.0435	0.042	-0.0591	-0.4283	4.9906	-24.4684		71.156	0.5634	-1.268	-0.0831	-0.0332	-1.8298	-0.0324	-0.5552	6.401	-21.9278		71.156	-0.3352	4.3528	-2.2992	-0.0724	0.267	-0.623	-1.2531	3.9008	-22.8352		71.156	-4.5418	0.6099	-1.0579	-1.0082	0.0094	0.0162	0.8407	0.2466	-10.6769		71.141	-0.4524	0.0491	-0.902	-0.0371	0.2893
71.203	5.2779	4.9787	-0.512	2.9259	0.0781	-0.0591	-0.4917	4.6701	-23.3796		71.219	0.5113	-1.1898	-0.0766	-0.0519	-1.8006	-0.0397	-0.3014	6.0163	-21.3834		71.218	-0.3222	4.3397	-2.3382	-0.0639	0.2825	-0.6594	-1.7607	3.9008	-22.8352		71.219	-4.4506	0.623	-1.0709	-0.9741	0.0438	-0.0032	0.7772	0.3107	-10.0417		71.203	-0.4394	0.1274	-0.8955	-0.032	0.2962
71.265	5.1867	4.9657	-0.4795	2.8033	0.0266	-0.0494	-0.6186	4.7983	-24.1054		71.281	0.5113	-1.0985	-0.0636	0.0009	-1.744	-0.0202	-1.8242	6.0163	-21.5649		71.281	-0.3352	4.3528	-2.3837	-0.069	0.2773	-0.6934	-1.8876	3.6443	-23.0166		71.281	-4.3855	0.649	-1.0579	-0.9468	0.0506	-0.0008	0.9676	0.2466	-10.8583		71.266	-0.4264	0.2187	-0.8955	-0.0456	0.2378
71.328	5.1216	4.9657	-0.4665	2.621	0.1039	-0.0397	-0.238	4.5419	-23.4703		71.344	0.4853	-1.0202	-0.0571	-0.0111	-1.6289	-0.0348	-0.7455	5.3111	-22.2		71.343	-0.3092	4.3397	-2.4357	-0.0707	0.2825	-0.7275	-1.7607	3.7726	-23.0166		71.344	-4.3074	0.649	-1.0644	-0.8889	0.0541	0.0284	1.2214	0.1184	-10.6769		71.328	-0.4264	0.31	-0.889	-0.0422	0.2859
71.39	5.0435	4.9657	-0.4275	2.4932	0.0884	-0.0421	0.0158	4.9265	-23.6518		71.406	0.4722	-0.955	-0.0571	-0.0383	-1.44	-0.0275	0.5234	5.1829	-21.6556		71.406	-0.2701	4.3397	-2.4682	-0.0741	0.2825	-0.7493	-1.5069	4.4136	-22.563		71.406	-4.2292	0.6882	-1.0644	-0.8122	0.0798	0.0041	0.2062	0.3748	-9.951		71.391	-0.4394	0.3752	-0.8825	-0.0354	0.2756
71.453	4.9784	4.9918	-0.395	2.2922	0.1434	-0.03	0.3331	5.6317	-24.4684		71.469	0.4201	-0.8768	-0.0506	-0.0179	-1.3713	-0.0397	-0.238	4.9265	-22.2		71.468	-0.2962	4.3397	-2.5072	-0.0758	0.2602	-0.7834	-1.9511	3.7084	-22.3815		71.469	-4.1511	0.7012	-1.0644	-0.8037	0.0506	-0.0008	0.7772	-0.2021	-10.4047		71.453	-0.4394	0.4534	-0.876	-0.061	0.3495
71.515	4.9132	4.9657	-0.382	2.1832	0.0953	-0.0445	0.0793	4.8624	-23.1074		71.531	0.4071	-0.7855	-0.0246	-0.0383	-1.3267	-0.047	-0.809	6.0163	-21.4742		71.531	-0.2571	4.3267	-2.5462	-0.0639	0.2996	-0.7834	-1.6973	3.7084	-22.1093		71.531	-4.073	0.7012	-1.0644	-0.7305	0.0524	0.0089	1.2214	0.3748	-9.5881		71.516	-0.4524	0.5447	-0.8695	-0.0439	0.3701
71.578	4.8481	4.9787	-0.3495	2.0571	0.1434	-0.047	-0.238	5.0547	-23.2888		71.594	0.368	-0.7073	-0.0246	-0.0366	-1.3215	-0.0445	-1.0628	5.6317	-21.4742		71.593	-0.2441	4.3397	-2.5852	-0.0707	0.2722	-0.8295	-0.9993	3.9008	-22.4722		71.594	-3.9948	0.7142	-1.0644	-0.6913	0.0919	0.0065	1.031	-0.0739	-9.5881		71.578	-0.4394	0.623	-0.8695	-0.0525	0.389
71.64	4.757	4.9787	-0.3171	1.9106	0.1399	-0.0567	-0.3014	4.9906	-23.6518		71.656	0.3941	-0.6421	-0.0246	-0.0349	-1.1893	-0.0275	-0.0476	5.6317	-22.1093		71.656	-0.218	4.3267	-2.6112	-0.0775	0.2756	-0.8393	-1.6973	3.9649	-21.5649		71.656	-3.9037	0.7273	-1.0579	-0.7049	0.0472	0.0162	0.8407	-0.0098	-9.4973		71.641	-0.4655	0.7142	-0.863	-0.0542	0.3701
71.703	4.6788	4.9787	-0.2976	1.7709	0.1296	-0.0397	0.0158	5.1829	-22.9259		71.719	0.368	-0.5508	-0.0051	-0.0213	-1.1	-0.03	-0.238	5.5676	-21.1112		71.718	-0.1789	4.3528	-2.6502	-0.0673	0.2687	-0.8879	-1.8242	4.2213	-21.3834		71.719	-3.8516	0.7273	-1.0579	-0.6317	0.0695	0.0381	1.7924	-0.3304	-10.2232		71.703	-0.4394	0.7794	-0.863	-0.0422	0.3752
71.765	4.6137	4.9918	-0.2716	1.6363	0.1863	-0.0567	-0.6821	4.9906	-22.7444		71.781	0.355	-0.4725	0.0014	-0.0128	-0.9884	-0.047	-0.1745	6.2728	-20.9298		71.781	-0.1399	4.3397	-2.7022	-0.0707	0.279	-0.8976	-1.5704	3.9649	-21.3834		71.781	-3.7604	0.7403	-1.0644	-0.618	0.073	0.0162	0.3965	-0.0739	-10.6769		71.766	-0.4394	0.8707	-0.85	-0.0286	0.3786
71.828	4.5225	4.9918	-0.2391	1.5085	0.1674	-0.0324	-0.3014	5.5035	-23.2888		71.844	0.368	-0.3812	0.0144	-0.0196	-0.954	-0.0518	0.7772	6.7215	-21.8371		71.843	-0.1008	4.3528	-2.7411	-0.0843	0.2687	-0.9268	-1.3166	3.9649	-21.3834		71.844	-3.6953	0.7534	-1.0579	-0.5312	0.0575	0.0065	0.6503	-0.5868	-10.3139		71.828	-0.4394	0.949	-0.85	-0.0439	0.3907
71.89	4.4314	4.9918	-0.2066	1.4336	0.1915	-0.0397	-0.3648	4.6701	-22.3815		71.906	0.368	-0.303	0.0274	0.0281	-0.875	-0.0348	0.1427	5.9522	-22.8352		71.906	-0.0617	4.3528	-2.7866	-0.0536	0.2893	-0.9681	-1.5069	4.1572	-21.202		71.906	-3.6041	0.7534	-1.0644	-0.5209	0.0472	0.0162	0.46	-0.5227	-10.0417		71.891	-0.4524	1.0403	-0.8435	-0.0133	0.4147
71.953	4.3532	4.9787	-0.1871	1.3246	0.2189	-0.0348	-0.1111	4.9265	-22.7444		71.969	0.342	-0.2247	0.0404	0.0043	-0.8407	-0.0397	-0.4917	6.0804	-21.202		71.968	-0.0096	4.3528	-2.8191	-0.0605	0.2722	-0.9924	-1.5069	4.029	-21.6556		71.969	-3.526	0.7534	-1.0644	-0.4766	0.0919	0.0187	0.7138	-0.0098	-9.5881		71.953	-0.4394	1.0924	-0.824	-0.0456	0.437
72.015	4.2621	4.9787	-0.1546	1.2309	0.2172	-0.0324	-0.1745	5.247	-23.1981		72.031	0.329	-0.1465	0.0534	-0.0008	-0.7977	-0.0397	-0.4917	6.3369	-20.6576		72.031	0.0164	4.3397	-2.8711	-0.057	0.2962	-0.9948	-1.38	3.9008	-21.5649		72.031	-3.4348	0.7534	-1.0644	-0.463	0.0575	0.0211	0.7138	0.2466	-10.7676		72.016	-0.4264	1.1968	-0.8305	-0.0542	0.4903
72.078	4.21	4.9918	-0.1286	1.1252	0.255	-0.0348	-0.238	5.3111	-22.563		72.094	0.329	-0.0552	0.0664	-0.0042	-0.7119	-0.0494	-0.1111	5.9522	-21.2927		72.093	0.0294	4.3397	-2.9101	-0.0332	0.2996	-1.0313	-1.6338	4.1572	-21.5649		72.094	-3.3697	0.7664	-1.0579	-0.4511	0.0592	0.0114	0.6503	0.4389	-8.7715		72.078	-0.4394	1.262	-0.824	-0.0542	0.4903
72.14	4.1188	4.9918	-0.0961	1.0469	0.2481	-0.0348	-0.4917	5.824	-23.2888		72.156	0.316	0.01	0.0794	-0.0093	-0.693	-0.0324	-0.6186	6.3369	-21.3834		72.156	0.0946	4.3397	-2.9426	-0.0502	0.279	-1.0847	-1.6973	3.7084	-21.3834		72.156	-3.2785	0.7403	-1.0644	-0.4085	0.0644	-0.0008	-0.238	0.1825	-8.7715		72.141	-0.4264	1.3533	-0.824	-0.0473	0.48
72.203	4.0537	4.9918	-0.0766	0.9123	0.2395	-0.0397	0.0793	6.0163	-23.4703		72.219	0.3029	0.0883	0.0924	-0.0128	-0.6105	-0.0324	0.2062	6.2728	-20.9298		72.218	0.1206	4.3528	-2.9881	-0.0707	0.2996	-1.0993	-1.4435	3.8367	-21.3834		72.219	-3.2134	0.7534	-1.0644	-0.3642	0.0506	0.0381	0.9676	-0.3945	-9.4066		72.203	-0.4394	1.4576	-0.811	-0.0678	0.4594
72.265	3.9625	4.9918	-0.0571	0.8373	0.3014	-0.0348	-0.3014	5.1188	-22.6537		72.281	0.2769	0.1665	0.1119	-0.0247	-0.5126	-0.0518	0.9676	5.8881	-20.4761		72.281	0.1336	4.3397	-3.0271	-0.069	0.2705	-1.1625	-1.5704	4.0931	-20.2039		72.281	-3.1222	0.7664	-1.0644	-0.3267	0.085	0.0065	0.0793	-0.2663	-9.4973		72.266	-0.4394	1.5098	-0.798	-0.0422	0.4576
72.328	3.8974	4.9918	-0.0246	0.8152	0.2653	-0.0324	-0.4283	5.3753	-22.7444		72.344	0.2899	0.2708	0.1184	-0.0042	-0.4697	-0.0324	1.031	6.2087	-21.1112		72.343	0.1466	4.3397	-3.0661	-0.0622	0.2739	-1.2111	-1.8876	3.6443	-20.2946		72.344	-3.0571	0.7664	-1.0579	-0.325	0.0592	0.0211	0.1427	-0.3304	-9.5881		72.328	-0.4394	1.588	-0.798	-0.0405	0.5418
72.39	3.8193	5.0048	-0.0311	0.7453	0.3048	-0.0251	-0.1745	5.247	-22.2908		72.406	0.3029	0.3491	0.1249	-0.0128	-0.4594	-0.0445	-0.6186	6.4651	-21.6556		72.406	0.1597	4.3528	-3.1116	-0.0451	0.2876	-1.2622	-1.8876	3.3879	-21.1112		72.406	-2.966	0.7794	-1.0579	-0.3046	0.0558	0.0187	0.3965	0.0543	-8.7715		72.391	-0.4394	1.6793	-0.7915	-0.0525	0.5779
72.453	3.7542	5.0048	0.0014	0.7317	0.3117	-0.0348	-0.4917	4.5419	-23.3796		72.469	0.2769	0.4143	0.1314	-0.0247	-0.4337	-0.0275	0.2062	5.7599	-21.2927		72.468	0.1466	4.3528	-3.1636	-0.0468	0.2687	-1.3108	-1.9511	3.452	-20.5668		72.469	-2.9008	0.7664	-1.0579	-0.2995	0.0712	0.0016	0.0793	-0.3945	-9.951		72.453	-0.4394	1.7445	-0.7915	-0.0831	0.5882
72.515	3.689	4.9918	0.0144	0.6073	0.3065	-0.0397	-0.809	5.1188	-22.9259		72.531	0.2769	0.5056	0.1379	-0.0008	-0.3512	-0.0397	0.6503	5.824	-20.9298		72.531	0.1987	4.3397	-3.2221	-0.0468	0.2619	-1.3667	-1.8242	3.1956	-20.6576		72.531	-2.8227	0.7664	-1.0579	-0.2381	0.0884	0.0259	0.7138	-0.138	-10.3139		72.516	-0.4394	1.8227	-0.7785	-0.0644	0.638
72.578	3.6109	4.9918	0.0404	0.5171	0.2911	-0.0445	-0.6186	5.5676	-23.924		72.594	0.2639	0.5708	0.1444	-0.0093	-0.2842	-0.0445	-0.1745	6.401	-20.6576		72.593	0.1987	4.3397	-3.2871	-0.0962	0.2533	-1.4347	-2.078	3.5802	-20.7483		72.594	-2.7446	0.7664	-1.0644	-0.1887	0.0936	0.0211	0.9676	-0.5227	-9.6788		72.578	-0.4394	1.901	-0.7785	-0.0456	0.6534
72.64	3.5328	4.9918	0.0469	0.4506	0.2687	-0.0372	-0.8724	5.9522	-23.3796		72.656	0.2769	0.6621	0.1379	-0.0076	-0.2516	-0.0421	0.0793	6.2728	-20.5668		72.656	0.2118	4.3528	-3.3455	-0.086	0.2567	-1.4542	-2.0145	3.2597	-19.7502		72.656	-2.6404	0.7664	-1.0514	-0.2245	0.0609	0.0114	0.2696	-0.2021	-9.0437		72.641	-0.4264	1.9923	-0.7655	-0.0354	0.6431
[truncated: 1,287 more rows]
[truncated: 116 more columns]

## Sheet: T2-T3
Specimen 1																																	Specimen 2
Lateral bending											Flexion/Extension											Axial rotation											Lateral bending											Flexion/Extension
[truncated: 1,657 more rows]
[truncated: 125 more columns]

## Sheet: T3-T4
Specimen 1																																	Specimen 2
[truncated: 2,193 more rows]
[truncated: 134 more columns]

[truncated: 1 more sheets: T4-T5]
