# Supplementary material for: In vitro analysis of the segmental flexibility of the thoracic spine
Source: PLoS One. 2017 May 16;12(5):e0177823. doi: 10.1371/journal.pone.0177823 (PMC5433776; doi:10.1371/journal.pone.0177823)
Supplement: S3 Dataset — The load-displacement raw data of all experiments regarding the segmental levels T5-T6, T6-T7, T7-T8, and T8-T9 including all 3.5 loading cycles are listed. (XLSX) [file pone.0177823.s003.xlsx]

## Sheet: T5-T6
Specimen 1																																	Specimen 2
Lateral bending											Flexion/Extension											Axial rotation											Lateral bending											Flexion/Extension
Time in s	Angle α in °	Angle β in °	Angle γ in °	Moment Mx in Nm	Moment My in Nm	Moment Mz in Nm	Force Fx in N	Force Fy in N	Force Fz in N		Time in s	Angle α in °	Angle β in °	Angle γ in °	Moment Mx in Nm	Moment My in Nm	Moment Mz in Nm	Force Fx in N	Force Fy in N	Force Fz in N		Time in s	Angle α in °	Angle β in °	Angle γ in °	Moment Mx in Nm	Moment My in Nm	Moment Mz in Nm	Force Fx in N	Force Fy in N	Force Fz in N		Time in s	Angle α in °	Angle β in °	Angle γ in °	Moment Mx in Nm	Moment My in Nm	Moment Mz in Nm	Force Fx in N	Force Fy in N	Force Fz in N		Time in s	Angle α in °	Angle β in °	Angle γ in °	Moment Mx in Nm	Moment My in Nm
1.203	1.2797	-0.1204	1.6886	0.2635	0.0721	-0.001	0.7772	0.8236	-9.5552		1.203	0.9281	0.3621	1.6171	0.0041	0.3176	-0.0469	1.0945	1.4006	-4.6556		1.187	-0.5436	-1.0333	2.5919	-0.0362	-0.0138	0.1488	1.1579	1.08	-3.1132		1.203	1.2536	0.7534	1.4052	0.2751	0.3151	-0.0324	-1.8242	5.3753	-26.7367		1.203	0.5374	0.7534	1.5741	0.006	0.3082
1.203	1.2667	-0.1204	1.6886	0.2635	0.0721	-0.001	0.7772	0.8236	-9.5552		1.203	0.9281	0.3882	1.6366	0.0041	0.3176	-0.0469	1.0945	1.4006	-4.6556		1.187	-0.5566	-1.0202	2.5984	-0.0362	-0.0138	0.1488	1.1579	1.08	-3.1132		1.203	1.2797	0.7142	1.4052	0.2751	0.3151	-0.0324	-1.8242	5.3753	-26.7367		1.203	0.5374	0.7534	1.5741	0.006	0.3082
1.265	1.2927	-0.1465	1.6756	0.267	0.0757	0.0014	1.6021	1.1441	-9.283		1.265	0.9281	0.3882	1.6236	0.0059	0.3019	-0.0348	1.031	1.2082	-4.6556		1.25	-0.5176	-1.0333	2.5984	-0.0116	-0.0103	0.1609	1.6655	1.5929	-3.9298		1.266	1.2667	0.7142	1.4052	0.2649	0.2876	-0.0397	-1.8876	5.6958	-26.8274		1.265	0.5374	0.7534	1.5741	0.0043	0.31
1.328	1.2667	-0.1334	1.6756	0.2723	0.0879	0.0159	1.3483	1.2723	-9.3738		1.328	0.9281	0.3882	1.6236	-0.0116	0.2984	-0.0493	1.0945	1.0159	-4.8371		1.312	-0.5436	-1.0463	2.6049	-0.0221	-0.0068	0.1609	1.2214	1.1441	-3.3854		1.328	1.2667	0.7142	1.4052	0.2598	0.3065	-0.0324	-1.8876	5.1829	-27.0996		1.328	0.5243	0.7534	1.5806	0.0026	0.3014
1.39	1.2667	-0.1465	1.6821	0.2758	0.0914	0.0087	1.3483	1.4006	-8.5572		1.39	0.9411	0.3882	1.6236	0.0041	0.3036	-0.0517	0.5234	0.9518	-4.4742		1.375	-0.5176	-1.0463	2.5919	0.0024	-0.0138	0.1754	2.6173	0.8877	-4.0205		1.391	1.2667	0.7273	1.4052	0.2837	0.3031	-0.03	-1.6338	5.3111	-27.0996		1.39	0.5374	0.7403	1.5806	0.0111	0.3134
1.453	1.2797	-0.1334	1.6756	0.2898	0.0458	-0.0252	0.9676	1.1441	-9.1016		1.453	0.915	0.3752	1.6301	0.0024	0.3019	-0.0542	0.7772	0.6954	-5.2908		1.437	-0.5436	-1.0333	2.5919	-0.0327	-0.0033	0.1585	0.9676	1.5288	-2.841		1.453	1.2667	0.7403	1.4052	0.2632	0.31	-0.0348	-1.38	5.6958	-26.0108		1.453	0.5374	0.7534	1.5676	0.023	0.3048
1.515	1.2927	-0.1465	1.6886	0.2652	0.0809	0.0014	1.4117	1.2082	-8.6479		1.515	0.9281	0.3882	1.6301	-0.0099	0.2931	-0.0445	0.8407	1.9134	-4.9278		1.5	-0.5566	-1.0333	2.5984	-0.0327	0.0003	0.1778	1.729	1.4006	-2.7502		1.516	1.2536	0.7534	1.4117	0.2803	0.3134	-0.0421	-1.9511	5.6317	-26.4645		1.515	0.5243	0.7664	1.5741	0.0077	0.31
1.578	1.2667	-0.1334	1.6756	0.26	0.0721	0.0087	1.6655	1.08	-9.0108		1.578	0.9281	0.3882	1.6366	-0.0011	0.3054	-0.0517	0.7772	1.08	-5.2		1.562	-0.5436	-1.0333	2.6049	-0.0239	0.002	0.1681	1.7924	1.4647	-3.3854		1.578	1.2536	0.7142	1.4052	0.282	0.3082	-0.0372	-2.0145	5.5676	-26.3738		1.578	0.5374	0.7534	1.5806	-0.0008	0.3117
1.64	1.2927	-0.1595	1.6821	0.2723	0.0739	-0.0107	1.3483	1.2723	-9.1016		1.64	0.9281	0.3752	1.6171	-0.0186	0.2984	-0.0372	0.7138	1.4006	-5.1093		1.625	-0.5436	-1.0202	2.5984	-0.0081	-0.0103	0.1778	1.9193	1.08	-3.2946		1.641	1.2667	0.7273	1.4052	0.2803	0.3065	-0.0445	-2.2049	5.5035	-26.7367		1.64	0.5374	0.7534	1.5676	0.0043	0.2996
1.703	1.2797	-0.1334	1.6821	0.274	0.0792	0.0135	1.1579	1.5929	-8.4664		1.703	0.9411	0.3621	1.6171	-0.0064	0.3176	-0.03	1.9193	1.4647	-5.0186		1.687	-0.5566	-1.0463	2.6049	-0.0029	-0.019	0.1561	1.4117	1.08	-3.3854		1.703	1.2667	0.7273	1.4052	0.299	0.3048	-0.047	-2.3318	5.3753	-26.646		1.703	0.5374	0.7664	1.5676	0.0162	0.3151
1.765	1.2927	-0.1465	1.6821	0.281	0.0651	-0.0083	0.9676	1.0159	-8.7386		1.765	0.9411	0.3882	1.6301	0.0147	0.3282	-0.0324	1.0945	0.8877	-4.202		1.75	-0.5436	-1.0333	2.6049	-0.0081	-0.0103	0.1657	1.3483	0.8877	-3.0224		1.766	1.2536	0.7273	1.4052	0.2888	0.2979	-0.0397	-2.3318	5.247	-26.646		1.765	0.5374	0.7403	1.5741	0.0094	0.2979
1.828	1.2927	-0.1595	1.6821	0.2617	0.0985	0.0111	1.5386	1.4647	-9.283		1.828	0.9281	0.3752	1.6301	-0.0099	0.3141	-0.0372	1.2214	1.1441	-4.5649		1.812	-0.5436	-1.0333	2.5984	-0.0221	-0.0243	0.1633	1.6021	1.657	-4.2927		1.828	1.2536	0.7273	1.4117	0.282	0.2945	-0.0421	-2.1414	5.3111	-26.646		1.828	0.5504	0.7534	1.5676	0.006	0.3048
1.89	1.2797	-0.1334	1.6886	0.2723	0.0879	0.0038	1.4117	1.3365	-8.8294		1.89	0.9281	0.3882	1.6236	-0.0204	0.3247	-0.0372	1.0945	1.4006	-4.8371		1.875	-0.5045	-1.0463	2.5984	-0.0204	-0.012	0.1681	1.4117	1.5929	-2.6595		1.891	1.2667	0.7403	1.4052	0.2939	0.3134	-0.0348	-2.2049	5.6317	-26.7367		1.89	0.5374	0.7664	1.5741	0.0026	0.3048
1.953	1.2797	-0.1465	1.6821	0.2512	0.0739	-0.0034	2.1097	1.5288	-8.5572		1.953	0.915	0.3882	1.6236	0.0129	0.3229	-0.0445	0.8407	0.6313	-4.8371		1.937	-0.5566	-1.0333	2.5919	-0.0362	-0.0068	0.1537	0.8407	1.5288	-2.7502		1.953	1.2667	0.7142	1.3987	0.2854	0.3151	-0.047	-1.7607	5.9522	-26.3738		1.953	0.5374	0.7534	1.5741	0.0026	0.2876
2.015	1.2927	-0.1595	1.6756	0.2775	0.1107	0.0038	1.4752	1.0159	-9.1923		2.015	0.9411	0.3621	1.6171	0.0164	0.3089	-0.0517	1.031	0.9518	-5.1093		2	-0.5436	-1.0333	2.6049	-0.0221	-0.0033	0.1706	1.8559	1.657	-4.0205		2.016	1.2667	0.7273	1.4052	0.2905	0.3134	-0.0445	-2.2049	5.5035	-26.7367		2.015	0.5374	0.7534	1.5741	0.0094	0.3048
2.078	1.2667	-0.1334	1.6821	0.2845	0.0967	-0.001	1.729	1.657	-8.5572		2.078	0.9281	0.3752	1.6171	0.0252	0.3176	-0.0276	1.8559	1.1441	-4.8371		2.062	-0.5306	-1.0333	2.6049	-0.0519	-0.0015	0.1681	1.3483	1.5288	-2.5688		2.078	1.2667	0.7403	1.4117	0.2956	0.3117	-0.0494	-1.8876	5.9522	-26.283		2.078	0.5374	0.7534	1.5806	0.006	0.2979
2.14	1.2667	-0.1595	1.6951	0.2565	0.0897	0.0014	0.7772	1.4647	-9.1923		2.14	0.9541	0.3752	1.6171	-0.0046	0.3229	-0.0372	1.6021	1.657	-4.202		2.125	-0.5436	-1.0463	2.5984	-0.0151	-0.0033	0.1754	1.7924	1.4647	-3.7483		2.141	1.2536	0.7403	1.4052	0.2786	0.3151	-0.0324	-1.7607	5.6958	-27.0089		2.14	0.5374	0.7534	1.5676	0.0128	0.3151
2.203	1.2797	-0.1465	1.6821	0.274	0.0757	-0.0034	1.4752	1.2723	-9.0108		2.203	0.9281	0.3882	1.6236	0.0269	0.2948	-0.0348	0.9676	1.2723	-4.2927		2.187	-0.5566	-1.0333	2.6049	-0.0274	-0.005	0.173	1.3483	1.7852	-2.7502		2.203	1.2667	0.7142	1.4052	0.282	0.3357	-0.0275	-1.8242	5.3753	-27.1904		2.203	0.5374	0.7534	1.5741	0.0077	0.31
2.265	1.2667	-0.1204	1.6886	0.2828	0.0739	-0.0034	1.4117	1.3365	-9.1923		2.265	0.9281	0.3752	1.6366	0.0287	0.3176	-0.0397	1.1579	0.9518	-4.5649		2.25	-0.5176	-1.0463	2.5919	-0.0169	-0.0225	0.173	1.4117	1.5929	-3.5668		2.266	1.2667	0.7403	1.4052	0.2598	0.3065	-0.047	-1.5704	5.5035	-27.0996		2.265	0.5374	0.7534	1.5741	0.0009	0.3031
2.328	1.3057	-0.1334	1.6886	0.2758	0.0704	-0.0034	1.0945	0.8877	-8.9201		2.328	0.9281	0.3621	1.6301	0.0041	0.3106	-0.0252	1.5386	1.4647	-5.1093		2.312	-0.5436	-1.0463	2.5984	-0.0134	-0.012	0.1681	1.9828	1.5288	-2.9317		2.328	1.2667	0.7273	1.4052	0.2871	0.3306	-0.0348	-2.1414	5.4394	-26.283		2.328	0.5374	0.7534	1.5676	0.0009	0.2996
2.39	1.2927	-0.1465	1.6756	0.274	0.0827	0.0038	1.4117	1.3365	-9.1923		2.39	0.915	0.3882	1.6171	0.0199	0.3159	-0.0348	0.8407	1.2723	-4.4742		2.375	-0.5436	-1.0333	2.6049	-0.0169	0.002	0.1826	2.5538	1.2082	-3.4761		2.391	1.2536	0.7273	1.4052	0.2734	0.3134	-0.0227	-2.078	5.1188	-26.7367		2.39	0.5374	0.7534	1.5741	0.0196	0.3048
2.453	1.2927	-0.1595	1.6886	0.2687	0.0879	-0.0179	1.1579	1.08	-8.9201		2.453	0.9281	0.3621	1.6301	-0.0204	0.3317	-0.0445	0.5234	1.5929	-3.2039		2.437	-0.5306	-1.0333	2.6049	-0.0116	0.0038	0.173	2.0462	1.5929	-2.7502		2.453	1.2667	0.7142	1.4182	0.2803	0.3168	-0.0421	-2.3952	5.6958	-26.3738		2.453	0.5374	0.7664	1.5806	0.0247	0.334
2.515	1.2797	-0.1334	1.6756	0.4054	0.0739	0.0014	0.9676	-0.2663	-8.7386		2.515	0.9281	0.3752	1.6496	-0.0011	0.5684	-0.0493	3.1249	1.1441	-3.6576		2.5	-0.5696	-0.9942	2.6309	-0.0309	0.0195	0.2116	1.729	1.2723	-2.841		2.516	1.2797	0.7273	1.4117	0.3825	0.2516	-0.0372	-1.8242	4.3495	-26.0108		2.515	0.5374	0.7534	1.5806	0.0213	0.4027
2.578	1.3578	-0.1465	1.6496	0.6122	0.0283	-0.0155	1.4752	-1.292	-8.5572		2.578	0.9281	0.4534	1.6691	-0.0169	0.7385	-0.0614	3.7594	1.5288	-3.2039		2.562	-0.5436	-1.0202	2.6634	-0.0186	-0.0068	0.2696	2.6807	1.3365	-2.3873		2.578	1.2797	0.7403	1.3922	0.6806	0.2464	-0.0421	-1.5704	3.452	-26.3738		2.578	0.5374	0.7925	1.5741	0.0366	0.583
2.64	1.4229	-0.1334	1.6301	0.5894	0.0336	-0.0058	1.729	-0.9073	-8.4664		2.64	0.9281	0.4925	1.6626	-0.0221	0.7893	-0.0397	3.1249	1.5288	-2.3873		2.625	-0.5306	-1.0333	2.7024	-0.0239	-0.019	0.2576	1.2848	1.2082	-3.3854		2.641	1.3578	0.7012	1.4117	0.7453	0.2876	-0.0348	-2.649	3.0033	-25.8294		2.64	0.5504	0.8447	1.5806	0.0247	0.7393
2.703	1.5011	-0.1465	1.6496	0.4668	-0.0366	-0.0276	1.2214	1.9134	-7.5591		2.703	0.9281	0.6099	1.6691	-0.0011	0.7332	-0.0421	2.8076	0.9518	-0.0282		2.687	-0.5306	-1.0724	2.7544	-0.0011	-0.0243	0.2745	2.6807	0.9518	-3.2039		2.703	1.4229	0.7142	1.3922	0.6193	0.2567	-0.047	-2.2049	6.0163	-25.5572		2.703	0.5243	0.949	1.5741	-0.0213	0.796
2.765	1.6313	-0.1465	1.6431	0.6472	-0.0278	-0.0058	2.3	0.9518	-7.5591		2.765	0.9541	0.7012	1.6626	-0.0064	0.7034	-0.0469	0.7772	1.3365	0.0625		2.75	-0.5045	-1.0333	2.7869	-0.0291	-0.0173	0.318	1.7924	1.08	-2.6595		2.766	1.5141	0.7273	1.4052	0.7658	0.2602	-0.0372	-1.6338	4.7983	-24.3776		2.765	0.5374	1.0142	1.5676	0.023	0.6998
2.828	1.6574	-0.1465	1.6431	0.635	-0.0401	-0.001	1.729	1.657	-7.6498		2.828	0.9541	0.7925	1.6561	-0.0116	0.7613	-0.0638	1.2848	1.2082	1.4235		2.812	-0.5436	-1.0463	2.8259	-0.0327	0.0003	0.347	1.9828	1.2723	-2.3873		2.828	1.5923	0.7273	1.4117	0.9361	0.2292	-0.064	-1.7607	3.9008	-24.4684		2.828	0.5374	1.0924	1.5546	0.0503	0.9162
2.89	1.7485	-0.1465	1.6366	0.8873	-0.0611	-0.0058	1.729	-0.7791	-7.7406		2.89	0.9281	0.8577	1.6691	-0.0274	0.8998	-0.03	2.4269	2.234	2.0587		2.875	-0.5566	-1.0202	2.8649	-0.0186	-0.0278	0.3639	2.0462	1.08	-3.2039		2.891	1.6443	0.7403	1.3792	1.1031	0.2018	-0.0445	-1.1897	2.9392	-24.1962		2.89	0.5504	1.1707	1.5416	0.0435	1.1703
2.953	1.7876	-0.1204	1.6236	1.0433	-0.0559	0.0183	2.2366	-1.6766	-7.1054		2.953	0.9411	0.949	1.6756	-0.0379	1.0015	-0.0542	3.1249	1.4006	2.7845		2.937	-0.5176	-0.9942	2.8974	-0.0537	-0.0173	0.3615	1.4117	1.08	-2.1151		2.953	1.7225	0.7273	1.3857	1.2769	0.2086	-0.0372	-1.1897	1.9134	-24.1054		2.953	0.5374	1.2489	1.5351	0.0349	1.3919
3.015	1.8527	-0.1334	1.5976	1.0608	-0.0699	-0.0083	2.1731	-0.8432	-5.7444		3.015	0.9411	1.0142	1.6886	-0.0151	1.0769	-0.0566	2.8076	1.3365	3.5104		3	-0.5436	-1.0202	2.9234	0.0024	-0.0594	0.3832	2.6173	1.4006	-2.2058		3.016	1.8006	0.7273	1.3857	1.3433	0.1691	-0.0664	-2.4587	2.4263	-25.0128		3.015	0.5374	1.3533	1.5286	0.0622	1.5773
3.078	1.9439	-0.1334	1.5976	1.1151	-0.0787	0.0014	1.6021	-0.5227	-5.7444		3.078	0.9281	1.1055	1.6756	-0.0256	1.112	-0.0542	2.8711	1.657	3.9641		3.062	-0.5566	-1.0463	2.9689	-0.0397	-0.0278	0.388	2.2366	1.1441	-2.2966		3.078	1.8657	0.7403	1.3727	1.3808	0.1588	-0.0543	-2.2049	3.3238	-23.2888		3.078	0.5243	1.3924	1.4961	0.0537	1.6271
3.14	2.022	-0.1204	1.6041	1.0433	-0.112	-0.03	1.9828	1.1441	-6.8332		3.14	0.915	1.1707	1.6886	-0.0309	1.1032	-0.0542	2.6173	1.2723	3.8733		3.125	-0.5696	-1.0463	3.0078	-0.0151	-0.0383	0.417	1.7924	1.7211	-2.2058		3.141	1.9569	0.7142	1.3727	1.4881	0.1674	-0.0494	-0.9993	4.029	-23.8332		3.14	0.5374	1.4837	1.4896	0.0537	1.8298
3.203	2.1132	-0.1074	1.5976	1.1344	-0.0769	0.0038	1.729	1.5288	-6.4703		3.203	0.915	1.262	1.6691	-0.0239	1.1278	-0.0517	1.8559	1.4006	4.5085		3.187	-0.5306	-1.0072	3.0793	-0.0151	-0.0594	0.4364	1.8559	1.2723	-2.7502		3.203	2.022	0.7142	1.3532	1.7164	0.0953	-0.0494	-1.8242	2.9392	-23.1981		3.203	0.5374	1.5619	1.4766	0.0775	2.2179
3.265	2.2174	-0.0943	1.5976	1.3412	-0.0734	0.0038	2.2366	-0.2663	-5.8352		3.265	0.902	1.3533	1.6951	-0.0204	1.2365	-0.0493	2.6173	1.2723	4.1455		3.25	-0.5045	-1.0594	3.0988	-0.0274	-0.0331	0.4605	1.9193	0.4389	-2.2058		3.266	2.0871	0.7273	1.3727	1.8084	0.1193	-0.0494	-1.6338	2.1057	-22.4722		3.265	0.5504	1.6141	1.4636	0.1082	2.527
3.328	2.2564	-0.0682	1.5781	1.4743	-0.0804	0.0014	2.6173	-0.6509	-5.2908		3.328	0.9281	1.4315	1.6886	-0.0116	1.2838	-0.0469	2.6807	0.9518	4.1455		3.312	-0.5436	-1.0333	3.1508	-0.0572	-0.0383	0.4823	1.4752	1.0159	-1.6614		3.328	2.1523	0.7403	1.3662	2.0367	0.109	-0.047	-1.3166	1.5288	-23.0166		3.328	0.5374	1.6923	1.4506	0.1184	2.9392
3.39	2.3346	-0.0682	1.5781	1.6163	-0.0822	0.0062	2.3635	-1.292	-5.3815		3.39	0.915	1.5358	1.6886	0.0006	1.3943	-0.0469	3.7594	1.4006	4.4177		3.375	-0.5566	-1.0463	3.2028	-0.0344	-0.0716	0.4895	2.1097	1.5288	-1.8429		3.391	2.2304	0.7142	1.3662	2.1712	0.0352	-0.0275	-0.9993	1.5929	-22.8352		3.39	0.5504	1.7706	1.4506	0.1184	3.1796
3.453	2.4127	-0.0682	1.5716	1.6268	-0.0716	-0.0058	2.6807	-0.4586	-4.1112		3.453	0.902	1.601	1.6886	-0.0309	1.4048	-0.0276	3.1249	1.1441	4.5992		3.437	-0.5306	-1.0333	3.2418	-0.0362	-0.0488	0.5258	2.3635	0.8877	-1.48		3.453	2.3085	0.7142	1.3597	2.2326	0.1039	-0.0494	-1.6973	2.6827	-22.7444		3.453	0.5243	1.8488	1.4312	0.1338	3.4561
3.515	2.5039	-0.0422	1.5781	1.6618	-0.0646	-0.0107	2.3	0.3107	-3.1132		3.515	0.9281	1.6402	1.6886	-0.0221	1.4592	-0.0397	2.9345	1.8493	4.7807		3.5	-0.5306	-1.0333	3.2743	-0.0432	-0.0839	0.5403	1.7924	1.4647	-2.2058		3.516	2.3867	0.7142	1.3532	2.3399	0.0163	-0.0421	-1.7607	3.2597	-23.4703		3.515	0.5113	1.9271	1.4312	0.178	3.7
3.578	2.5951	-0.0161	1.5781	1.7004	-0.0576	0.0062	2.7442	0.1184	-3.1132		3.578	0.902	1.7967	1.7211	-0.0414	1.4539	-0.0517	1.8559	1.1441	5.0529		3.562	-0.5176	-1.0594	3.3198	-0.0624	-0.0787	0.5427	1.6655	0.9518	-2.6595		3.578	2.4258	0.7142	1.3467	2.4949	0.0386	-0.047	-1.5704	2.5545	-22.2908		3.578	0.4722	2.0053	1.4182	0.1406	4.1156
3.64	2.6732	-0.0161	1.5651	1.788	-0.0927	-0.0058	2.1097	0.3748	-2.6595		3.64	0.915	1.7967	1.7081	0.0041	1.6117	-0.0566	3.2518	1.657	4.5085		3.625	-0.5176	-1.0202	3.3523	-0.0291	-0.0418	0.5669	1.8559	0.3748	-1.2985		3.641	2.5169	0.7142	1.3402	2.7181	0.0541	-0.0664	-1.8242	2.2981	-23.1074		3.64	0.4462	2.0705	1.4117	0.1627	4.5054
3.703	2.7513	-0.003	1.5456	1.9177	-0.0471	-0.0058	2.5538	0.0543	-3.0224		3.703	0.902	1.914	1.7146	-0.0099	1.6679	-0.0397	3.3787	1.2723	4.6899		3.687	-0.5176	-1.0202	3.4043	-0.0081	-0.0524	0.591	2.0462	0.6954	-2.0244		3.703	2.569	0.7012	1.3337	2.9208	0.0111	-0.0397	-1.3166	2.2981	-23.1981		3.703	0.4201	2.1227	1.3922	0.161	4.8059
3.765	2.8425	0.01	1.5261	2.0561	-0.0909	-0.001	1.4117	-0.8432	-2.3873		3.765	0.902	2.0053	1.7081	-0.0134	1.7345	-0.0493	3.5056	2.0416	4.8714		3.75	-0.5436	-1.0202	3.4368	-0.0572	-0.0734	0.6321	2.3635	0.6313	-1.9336		3.766	2.6602	0.7273	1.3207	3.0401	-0.0404	-0.0445	-1.5704	1.657	-22.563		3.765	0.3941	2.214	1.3987	0.1729	5.0859
3.828	2.8816	0.01	1.5326	2.2051	-0.0892	-0.0058	2.3635	-1.0355	-1.6614		3.828	0.902	2.0575	1.7211	0.0059	1.7713	-0.0469	3.3152	1.4647	4.327		3.812	-0.5436	-1.0072	3.4693	-0.0607	-0.0699	0.6394	2.3635	0.8877	-1.2078		3.828	2.7253	0.7142	1.3142	3.1985	0.0197	-0.047	-0.9993	2.875	-23.1074		3.828	0.368	2.2792	1.3922	0.1917	5.3555
3.89	2.9858	0.0231	1.5196	2.3155	-0.0453	0.0135	2.5538	-0.5868	-1.6614		3.89	0.902	2.1618	1.7341	-0.0221	1.8765	-0.0542	2.998	1.657	4.7807		3.875	-0.5436	-0.9811	3.5148	-0.0221	-0.0629	0.6659	1.5386	0.5672	-1.6614		3.891	2.8165	0.7142	1.3077	3.3143	-0.0764	-0.0421	-1.5069	2.875	-23.4703		3.89	0.355	2.3574	1.3857	0.1763	5.5667
3.953	3.0639	0.0231	1.5131	2.3505	-0.0839	-0.0034	2.8076	-0.4586	-0.9356		3.953	0.9281	2.214	1.7276	-0.0151	1.9326	-0.0662	2.6807	1.3365	4.6899		3.937	-0.5436	-0.9811	3.5668	-0.0554	-0.0646	0.6925	1.6655	1.2082	-1.2985		3.953	2.8946	0.7403	1.3012	3.5903	-0.073	-0.0324	-1.4435	1.5288	-22.6537		3.953	0.329	2.4487	1.3792	0.1712	5.9737
4.015	3.1551	0.0361	1.5131	2.4504	-0.0716	-0.0179	2.6173	0.503	-1.7522		4.015	0.902	2.3314	1.7276	-0.0011	2.0028	-0.0445	2.998	1.7852	4.6899		4	-0.5436	-0.9942	3.5927	-0.0186	-0.0594	0.6829	1.9193	0.6954	-1.6614		4.016	2.9727	0.7012	1.2947	3.8254	0.0129	-0.0372	-1.3166	1.1441	-22.7444		4.015	0.3029	2.54	1.3662	0.1712	6.1832
4.078	3.2332	0.0231	1.5001	2.5941	-0.0892	-0.0107	1.7924	0.1825	-1.117		4.078	0.915	2.3705	1.7276	-0.0081	2.094	-0.0614	2.5538	1.7211	4.5992		4.062	-0.5566	-1.0202	3.6447	-0.0169	-0.0541	0.7336	2.0462	0.6954	-1.3892		4.078	3.0248	0.7273	1.2882	3.977	-0.085	-0.0397	-1.1897	1.7852	-23.1981		4.078	0.2899	2.5661	1.3467	0.1849	6.6847
4.14	3.2853	0.0491	1.4871	2.7483	-0.1067	-0.001	1.9828	-0.3945	-1.2985		4.14	0.902	2.4226	1.7276	-0.0134	2.1834	-0.0662	2.3635	1.9134	4.2363		4.125	-0.5566	-0.9681	3.6772	-0.0344	-0.0681	0.7191	1.1579	0.5672	-1.7522		4.141	3.09	0.7012	1.2817	4.1252	-0.0146	-0.047	-0.7455	1.4647	-23.4703		4.14	0.2769	2.6443	1.3467	0.1866	6.9852
4.203	3.3765	0.0231	1.4936	2.941	-0.0646	-0.0155	2.1097	-0.9073	-1.48		4.203	0.876	2.54	1.7341	0.0041	2.3833	-0.0252	3.6325	2.0416	5.1436		4.187	-0.5566	-0.9159	3.7097	-0.0291	-0.0418	0.7553	2.0462	1.2082	-0.7541		4.203	3.1941	0.7012	1.2622	4.2769	-0.0163	-0.0567	-0.9359	2.9392	-23.3796		4.203	0.2769	2.7226	1.3337	0.2309	7.3836
4.265	3.4546	0.0622	1.4806	3.0865	-0.0594	-0.0058	2.6807	-1.2279	-2.6595		4.265	0.8369	2.6052	1.7406	0.0006	2.478	-0.0759	3.6959	1.5929	4.5085		4.25	-0.5436	-0.9159	3.7552	-0.0186	-0.0629	0.7723	1.8559	-0.138	-1.117		4.266	3.2593	0.7142	1.2622	4.5051	-0.0473	-0.0543	-1.6973	1.9134	-22.8352		4.265	0.2769	2.7748	1.3402	0.2206	7.7271
4.328	3.5067	0.0752	1.4611	3.1303	-0.0541	0.0038	2.2366	-0.7791	-1.9336		4.328	0.915	2.7226	1.7731	-0.0151	2.5639	-0.0711	4.7745	1.4006	4.327		4.312	-0.5436	-0.9029	3.8007	-0.0432	-0.0699	0.8061	2.4269	1.3365	-0.9356		4.328	3.3244	0.7142	1.2557	4.776	-0.0284	-0.047	-1.2531	1.4647	-23.3796		4.328	0.2769	2.84	1.3402	0.224	7.7718
4.39	3.5979	0.1013	1.4871	3.2915	-0.0646	-0.001	2.3	-1.2279	-1.48		4.39	0.8499	2.7748	1.7601	0.0164	2.6726	-0.0662	4.0132	1.9134	5.0529		4.375	-0.5436	-0.9029	3.8397	-0.0239	-0.0541	0.8327	2.2366	1.1441	-0.9356		4.391	3.4155	0.7142	1.2492	4.9992	-0.0404	-0.047	-0.9993	1.2082	-23.6518		4.39	0.2639	2.8921	1.3337	0.2343	7.7099
4.453	3.663	0.1013	1.4741	3.4457	-0.0681	-0.001	1.9193	-0.715	-2.0244		4.453	0.876	2.8139	1.7796	0.0041	2.7726	-0.0832	2.998	1.7852	4.5992		4.437	-0.5696	-0.9029	3.8722	-0.0414	-0.0541	0.8641	2.4904	0.6313	-1.5707		4.453	3.4807	0.7142	1.2492	5.1286	-0.1125	-0.0397	-0.8724	0.9518	-23.4703		4.453	0.2769	2.866	1.3402	0.2087	6.956
4.515	3.7411	0.1274	1.4546	3.5754	-0.0716	-0.0034	2.1731	-0.4586	-1.8429		4.515	0.889	2.9052	1.7536	0.0041	2.8708	-0.0638	3.3152	2.1057	5.8695		4.5	-0.5566	-0.9029	3.9047	-0.0537	-0.0488	0.8738	1.9828	0.7595	-1.6614		4.516	3.5718	0.7142	1.2492	5.391	-0.0404	-0.0616	-1.2531	1.08	-22.8352		4.515	0.2639	2.8139	1.3467	0.2155	6.2348
4.578	3.8193	0.0883	1.4416	3.7243	-0.0594	-0.0083	1.6021	-0.9073	-2.0244		4.578	0.876	2.9965	1.7796	0.0252	3.0461	-0.0638	3.6325	1.4006	4.5992		4.562	-0.5176	-0.8898	3.9567	-0.0274	-0.0576	0.9052	1.4752	0.7595	-1.7522		4.578	3.6239	0.7273	1.2427	5.6039	-0.1348	-0.03	-0.5552	1.5288	-23.6518		4.578	0.2769	2.7487	1.3532	0.1832	5.917
4.64	3.9104	0.1143	1.4351	3.8347	-0.0401	-0.001	2.4269	-1.0997	-3.2039		4.64	0.8629	3.1008	1.7601	0.0024	3.1286	-0.059	3.569	2.234	4.7807		4.625	-0.5436	-0.8768	4.0087	-0.0554	-0.0716	0.9221	1.9193	0.5672	-0.0282		4.641	3.7021	0.7142	1.2362	5.8288	-0.1108	-0.0591	-0.9359	1.1441	-22.3815		4.64	0.2899	2.6704	1.3467	0.1797	5.2164
4.703	3.9755	0.1143	1.4351	4.0152	-0.0383	0.0014	2.4904	-0.7791	-4.2927		4.703	0.8629	3.166	1.7731	0.0147	3.3162	-0.0711	3.4421	1.4647	5.3251		4.687	-0.5176	-0.8898	4.0347	-0.0414	-0.0471	0.9414	1.1579	0.6954	-0.8448		4.703	3.7672	0.7012	1.2362	6.1218	-0.1211	-0.0348	-0.4917	1.2082	-23.924		4.703	0.2639	2.6052	1.3532	0.1542	4.7269
4.765	4.0407	0.1535	1.4286	4.1449	-0.0488	0.0087	2.4269	-0.4586	-2.9317		4.765	0.876	3.2573	1.799	-0.0046	3.4126	-0.0832	3.6959	1.9775	4.8714		4.75	-0.5566	-0.8507	4.0607	-0.0256	-0.0559	0.997	1.8559	0.3748	-0.4819		4.766	3.8323	0.7142	1.2297	6.3143	-0.1881	-0.0543	-1.0628	0.7595	-23.2888		4.765	0.2899	2.54	1.3857	0.0724	4.1705
4.828	4.0797	0.1274	1.4481	4.257	-0.0664	0.0014	2.9345	-1.0997	-2.9317		4.828	0.8499	3.2964	1.7861	0.0515	3.5459	-0.0566	4.3939	2.2981	4.8714		4.812	-0.5176	-0.8377	4.1062	-0.0554	-0.0366	1.0018	1.9193	0.3107	-0.8448		4.828	3.8844	0.7012	1.2362	6.4268	-0.0919	-0.064	-0.4917	1.4647	-23.1981		4.828	0.2508	2.4618	1.3922	0.1355	3.6639
4.89	4.249	0.1535	1.4156	4.4025	-0.0541	-0.0034	2.6173	-1.5484	-3.6576		4.89	0.8499	3.4268	1.7796	0.0269	3.6686	-0.0638	3.6959	2.1057	4.7807		4.875	-0.5176	-0.8507	4.1517	-0.0256	-0.0383	1.0526	2.7442	1.1441	-0.2097		4.891	3.9625	0.7012	1.2297	6.6823	-0.1262	-0.0664	-1.1897	1.1441	-23.924		4.89	0.2639	2.4096	1.3792	0.0963	3.4733
4.953	4.2881	0.1404	1.4091	4.5409	-0.0769	-0.0228	3.5056	-1.1638	-2.6595		4.953	0.8369	3.5051	1.7731	0.0252	3.7826	-0.0687	3.7594	2.2981	5.7787		4.937	-0.5176	-0.8246	4.1841	-0.0414	-0.0541	1.0719	1.6021	0.7595	-0.3912		4.953	4.0407	0.7142	1.2297	6.8902	-0.2293	-0.0664	-1.1897	1.5288	-23.1981		4.953	0.2769	2.3314	1.3922	0.069	3.1161
5.015	4.3402	0.1535	1.4026	4.6531	-0.0524	-0.0131	1.9828	-0.9073	-3.2946		5.015	0.8629	3.5572	1.7861	0.0287	3.972	-0.0928	4.0132	2.1699	5.2343		5	-0.5436	-0.8507	4.2231	-0.0344	-0.0471	1.1057	1.6021	1.0159	-0.2097		5.016	4.1188	0.7012	1.2232	7.2155	-0.0696	-0.0591	-0.3648	0.4389	-23.1981		5.015	0.2639	2.2401	1.4117	0.0622	2.7142
5.078	4.4314	0.1535	1.3961	4.8143	-0.0559	-0.0445	2.1097	-1.292	-3.839		5.078	0.8108	3.5964	1.799	0.0357	4.1403	-0.0542	3.9497	2.3622	5.2343		5.062	-0.5436	-0.8116	4.2556	-0.0449	-0.0506	1.1323	2.1097	0.7595	-0.3912		5.078	4.1839	0.7142	1.2297	7.3978	-0.2018	-0.0518	-0.6186	1.2082	-23.6518		5.078	0.2639	2.1879	1.3922	0.052	2.4154
5.14	4.4965	0.1795	1.3896	4.9369	-0.0383	-0.001	3.0614	-1.3561	-4.2927		5.14	0.8239	3.7398	1.7796	0.0322	4.228	-0.0904	4.3939	2.4263	6.0509		5.125	-0.5436	-0.8246	4.3011	-0.0099	-0.0471	1.1903	2.3	0.3107	-1.0263		5.141	4.2621	0.7273	1.2362	7.6585	-0.2207	-0.0421	-0.1111	1.2082	-23.561		5.14	0.2769	2.1097	1.3922	0.0145	2.1269
5.203	4.5877	0.1795	1.3896	5.0543	-0.019	-0.0131	2.998	-1.292	-4.1112		5.203	0.7978	3.792	1.7926	0.0252	4.3788	-0.0783	3.9497	2.234	5.0529		5.187	-0.5176	-0.8116	4.3466	-0.0221	-0.0804	1.1951	1.9828	1.1441	0.1533		5.203	4.3272	0.7142	1.2037	7.8288	-0.0936	-0.0664	-0.7455	0.6954	-23.924		5.203	0.2639	2.0444	1.3987	0.0418	2.0239
5.265	4.6788	0.1926	1.4091	5.2261	-0.0611	-0.0348	2.4904	-1.0355	-4.3834		5.265	0.8239	3.8702	1.7796	0.0252	4.5507	-0.0493	5.0918	2.1057	4.8714		5.25	-0.5436	-0.8246	4.3856	-0.0274	-0.0471	1.2338	2.2366	0.6313	-0.2097		5.266	4.3793	0.7273	1.2167	7.5937	-0.1108	-0.0445	-0.4283	2.8109	-24.7406		5.265	0.2639	1.9662	1.3922	0.0094	1.8195
5.328	4.77	0.1535	1.3831	5.3172	-0.0716	-0.0131	2.8076	-1.4843	-4.5649		5.328	0.7197	3.9485	1.8055	0.0585	4.7278	-0.0856	4.1401	1.7852	5.0529		5.312	-0.5176	-0.7985	4.4181	-0.0327	-0.0699	1.2942	2.8711	1.4006	0.3347		5.328	4.3793	0.7273	1.2167	7.512	-0.0799	-0.0227	-0.238	2.7468	-24.4684		5.328	0.2769	1.8749	1.3857	0.0094	1.6478
5.39	4.8091	0.2056	1.3636	5.4504	-0.0506	0.0038	2.4904	-1.0355	-5.4722		5.39	0.7718	4.0006	1.799	0.0217	4.8488	-0.0517	4.5842	2.234	5.3251		5.375	-0.5176	-0.8116	4.4766	-0.0186	-0.0734	1.3184	1.6655	-0.0739	-0.3912		5.391	4.3663	0.7142	1.2037	6.9907	-0.0249	-0.0543	-0.6821	3.3238	-23.6518		5.39	0.2639	1.8227	1.3987	0.0145	1.4365
5.453	4.9002	0.1926	1.3701	5.5835	-0.0471	0.0087	3.0614	-1.3561	-5.1093		5.453	0.7457	4.0919	1.799	0.0444	4.9908	-0.0638	4.4573	1.8493	5.1436		5.437	-0.5436	-0.7855	4.5221	-0.0344	-0.0681	1.357	2.3	1.2082	-0.119		5.453	4.3011	0.7012	1.1972	6.437	0.1657	-0.0445	-0.8724	3.3879	-24.1054		5.453	0.2639	1.7315	1.4117	0.0366	1.2871
5.515	4.9523	0.1926	1.3766	5.736	-0.0629	0.0014	2.3	-1.0997	-4.2927		5.515	0.7848	4.1571	1.8055	0.0409	5.082	-0.0759	4.1401	1.9134	5.1436		5.5	-0.5176	-0.7855	4.5611	-0.0169	-0.0646	1.403	2.4904	1.5288	-0.119		5.516	4.2751	0.7403	1.1972	6.4217	0.0197	-0.0664	-2.078	2.4263	-23.924		5.515	0.2508	1.6663	1.4052	0.0094	1.1635
5.578	5.0305	0.2056	1.3246	5.8184	-0.0401	-0.0034	2.4904	-1.8048	-5.563		5.578	0.7327	4.2484	1.8055	0.0234	5.1977	-0.0638	3.7594	1.4006	4.327		5.562	-0.5045	-0.7594	4.6066	-0.0309	-0.0541	1.4489	2.3	1.4647	-0.0282		5.578	4.1839	0.7142	1.2037	5.9004	0.1571	-0.0421	-0.9993	2.3622	-23.1981		5.578	0.2769	1.575	1.4182	-0.0008	1.0364
5.64	5.1346	0.1535	1.3766	5.9726	-0.0576	-0.0058	2.2366	-1.4202	-5.2		5.64	0.7067	4.3267	1.8055	-0.0029	5.3924	-0.0856	3.2518	2.0416	5.5065		5.625	-0.5176	-0.7203	4.6521	-0.0379	-0.0366	1.5117	1.9193	0.8236	0.9699		5.641	4.1058	0.7142	1.1842	5.42	0.2052	-0.0518	-0.9993	5.1829	-24.3776		5.64	0.2639	1.4967	1.4182	-0.0025	0.8492
5.703	5.1867	0.2056	1.3506	6.0497	-0.026	-0.0179	2.3635	-1.6766	-5.6537		5.703	0.7197	4.3919	1.812	0.0164	5.587	-0.0638	4.6477	2.4263	5.5065		5.687	-0.4915	-0.7073	4.6911	-0.0467	-0.0313	1.5431	2.2366	1.1441	0.8791		5.703	4.0016	0.7012	1.1582	5.098	0.152	-0.0591	-1.5704	4.4777	-24.2869		5.703	0.2508	1.4446	1.4182	-0.0128	0.7015
5.765	5.2779	0.2056	1.3636	6.1934	-0.0401	-0.0034	2.5538	-1.7407	-5.8352		5.765	0.6546	4.5092	1.799	0.0199	5.6571	-0.0807	4.5842	2.1057	4.9621		5.75	-0.5045	-0.7073	4.7366	-0.0467	-0.0453	1.5697	1.8559	0.7595	0.1533		5.766	3.9886	0.7142	1.1712	5.0196	0.2275	-0.0421	-1.0628	3.452	-23.7425		5.765	0.2639	1.3663	1.4441	-0.0213	0.5899
5.828	5.356	0.2317	1.3441	6.3405	-0.0506	-0.0107	2.5538	-2.6382	-6.0166		5.828	0.6806	4.5614	1.7796	0.0567	5.8728	-0.088	4.267	1.4006	4.9621		5.812	-0.5045	-0.7073	4.7755	-0.0484	-0.0296	1.6253	2.998	1.0159	0.6977		5.828	3.9104	0.7012	1.1842	4.5665	0.2103	-0.0372	-1.8876	4.9265	-23.7425		5.828	0.2639	1.2881	1.4441	0.0162	0.5074
5.89	5.4212	0.2056	1.3376	6.4509	-0.0278	-0.0034	2.8076	-1.869	-5.2		5.89	0.6155	4.6266	1.7861	-0.0221	6.0569	-0.0687	5.5994	2.234	4.5992		5.875	-0.5176	-0.6812	4.8275	-0.0502	-0.0418	1.6688	2.6173	0.8877	1.2421		5.891	3.8583	0.7012	1.1777	4.2309	0.1812	-0.0494	-1.2531	5.0547	-24.4684		5.89	0.2639	1.2229	1.4571	-0.0076	0.4078
5.953	5.5123	0.2448	1.3311	6.528	-0.0208	-0.0034	1.9828	-1.9331	-6.4703		5.953	0.6155	4.6918	1.7796	0.0094	6.1692	-0.0638	4.3939	1.657	4.327		5.937	-0.4915	-0.6942	4.847	-0.0414	-0.0506	1.6881	1.4752	0.7595	0.8791		5.953	3.7932	0.6882	1.1777	4.224	0.1983	-0.0591	-2.7125	3.9649	-24.1962		5.953	0.2639	1.1316	1.4701	0.0026	0.3254
6.015	5.5644	0.2317	1.3311	6.6577	-0.0313	-0.0203	2.0462	-2.2536	-6.6518		6.015	0.6155	4.757	1.7926	0.0112	6.3042	-0.0904	4.9014	2.1699	5.7787		6	-0.5045	-0.7073	4.8925	-0.0274	-0.0506	1.7533	2.0462	0.5672	0.244		6.016	3.7151	0.6751	1.1777	3.8646	0.2069	-0.047	-1.4435	4.4777	-24.4684		6.015	0.3029	1.0533	1.4766	-0.0162	0.334
6.078	5.6686	0.1926	1.3311	6.7839	-0.0138	-0.0155	2.2366	-1.292	-6.7425		6.078	0.5894	4.8744	1.7731	0.0112	6.3778	-0.0783	3.3787	1.7852	4.8714		6.062	-0.4915	-0.6812	4.9315	-0.0169	-0.0541	1.8113	2.6173	1.2723	0.0625		6.078	3.6369	0.6882	1.1777	3.6823	0.2533	-0.0543	-1.5069	4.9265	-23.1074		6.078	0.2639	0.962	1.4831	0.0111	0.2207
6.14	5.7598	0.2578	1.3376	6.8978	-0.0366	-0.0107	2.0462	-2.3818	-6.7425		6.14	0.6025	4.9396	1.7926	0.0199	6.569	-0.0687	3.4421	2.1057	5.1436		6.125	-0.5176	-0.6942	4.9575	-0.0362	-0.0664	1.8258	2.6807	0.5672	0.8791		6.141	3.5718	0.6751	1.1777	3.5716	0.2	-0.0567	-2.2683	4.029	-23.4703		6.14	0.2639	0.8838	1.4896	-0.0162	0.152
6.203	5.8249	0.2578	1.3246	7.0292	0.0073	-0.0034	2.4904	-2.4459	-6.3796		6.203	0.6155	5.0179	1.7926	0.0287	6.7285	-0.0807	4.0132	2.2981	5.2343		6.187	-0.5045	-0.7073	5.003	-0.0379	-0.0716	1.879	1.9193	0.3107	0.9699		6.203	3.4937	0.6882	1.1777	3.27	0.1812	-0.03	-1.38	5.0547	-23.924		6.203	0.2508	0.8055	1.4961	-0.0281	0.0129
6.265	5.89	0.2578	1.2986	7.1168	-0.0068	0.0014	2.4269	-2.2536	-7.0147		6.265	0.6415	5.0961	1.799	0.0164	6.9828	-0.0807	4.267	1.657	5.5973		6.25	-0.4655	-0.6812	5.068	-0.0186	-0.0874	1.9273	2.5538	0.6954	0.8791		6.266	3.4286	0.6882	1.1907	2.9872	0.2498	-0.0518	-1.1262	4.6701	-23.3796		6.265	0.2508	0.7273	1.5026	-0.0008	-0.0421
6.328	5.9681	0.2578	1.3051	7.1992	-0.0015	0.0014	2.998	-2.3177	-7.4684		6.328	0.5894	5.2265	1.799	0.0024	7.1652	-0.0735	4.9649	2.1057	6.6861		6.312	-0.5306	-0.6681	5.094	-0.0309	-0.0716	1.9732	2.8711	0.7595	0.9699		6.328	3.3374	0.6751	1.2037	2.9378	0.2035	-0.0591	-1.6973	4.606	-24.1054		6.328	0.2639	0.649	1.5221	0.0043	-0.0129
6.39	6.0463	0.2578	1.3051	7.3166	-0.0208	-0.0203	2.1731	-2.2536	-7.7406		6.39	0.5894	5.2787	1.7861	0.0269	7.2739	-0.0856	4.267	1.4006	5.3251		6.375	-0.4915	-0.6551	5.1395	-0.0449	-0.0681	2.0192	2.1097	0.6313	1.1513		6.391	3.2723	0.6751	1.2037	2.6585	0.2516	-0.03	-1.7607	5.3111	-23.8332		6.39	0.2639	0.5708	1.5156	0.006	-0.0009
6.453	6.1244	0.2839	1.3051	7.3989	0.016	-0.0058	1.9828	-1.9331	-7.6498		6.453	0.5894	5.3569	1.7731	0.0234	7.3721	-0.0783	4.838	1.8493	4.7807		6.437	-0.4915	-0.629	5.1655	-0.0309	-0.0576	2.0868	1.9193	0.8236	0.9699		6.453	3.1941	0.6751	1.2232	2.5017	0.2447	-0.0348	-2.078	5.1188	-24.3776		6.453	0.2508	0.4795	1.5351	-0.0179	0.0026
6.515	6.2416	0.2578	1.2856	7.5234	-0.0103	0.0038	2.5538	-2.6382	-8.1942		6.515	0.5894	5.4221	1.7861	0.0287	7.4966	-0.0832	4.0766	1.7211	5.688		6.5	-0.5045	-0.6421	5.1915	-0.0414	-0.0506	2.1158	1.9828	0.8877	1.7865		6.516	3.142	0.6882	1.2232	2.3535	0.2121	-0.0421	-2.4587	4.2213	-24.3776		6.515	0.2378	0.3882	1.5351	-0.0264	-0.0782
6.578	6.2937	0.2839	1.2921	7.5829	0.0038	-0.0034	2.8076	-2.2536	-8.4664		6.578	0.6025	5.5395	1.7861	0.0182	7.7175	-0.0807	4.267	2.0416	6.3231		6.562	-0.4915	-0.6551	5.237	-0.0379	-0.0401	2.1859	2.8711	0.8877	1.5143		6.578	3.0509	0.6751	1.2427	2.1644	0.2035	-0.0543	-1.6973	5.3753	-24.2869		6.578	0.2508	0.336	1.5416	-0.0196	-0.2396
6.64	6.3588	0.2839	1.2791	7.6811	0.0143	-0.0131	2.4269	-1.9972	-8.1942		6.64	0.6155	5.5917	1.8055	0.0269	7.4703	-0.0832	2.3635	1.657	5.688		6.625	-0.5176	-0.6551	5.2825	-0.0239	-0.0681	2.2366	3.0614	0.5672	1.7865		6.641	2.9597	0.6751	1.2557	1.9787	0.2498	-0.0567	-1.5069	5.5676	-24.5591		6.64	0.2508	0.2708	1.5351	-0.0179	-0.31
6.703	6.3719	0.2969	1.2791	7.3902	0.0055	-0.03	2.3	-0.4586	-8.1035		6.703	0.5504	5.6047	1.7861	0.0357	7.0793	-0.0638	2.8711	2.2981	4.6899		6.687	-0.5045	-0.629	5.328	-0.0449	-0.0611	2.2584	1.729	0.3748	1.605		6.703	2.8686	0.6621	1.2817	1.9055	0.2207	-0.0688	-1.8876	5.9522	-24.2869		6.703	0.2378	0.1926	1.5611	-0.023	-0.3804
6.765	6.4109	0.31	1.2856	6.9994	0.0336	-0.0252	1.7924	1.3365	-7.1054		6.765	0.5634	5.5656	1.7861	0.0322	6.6549	-0.0662	3.0614	1.5929	5.0529		6.75	-0.4785	-0.5899	5.3604	-0.0204	-0.0646	2.3381	2.7442	0.6313	1.9679		6.766	2.8165	0.6751	1.2687	1.7504	0.2602	-0.047	-1.1262	4.7983	-24.3776		6.765	0.2118	0.1143	1.5676	0.0077	-0.3495
6.828	6.3458	0.3491	1.2986	6.6682	0.0634	-0.03	1.7924	-0.715	-6.3796		6.828	0.5764	5.4873	1.8055	0.0602	6.1779	-0.0735	-0.3648	1.5929	4.8714		6.812	-0.4655	-0.6029	5.3929	-0.0327	-0.0699	2.4058	2.6173	1.2723	1.2421		6.828	2.7644	0.6882	1.2817	1.6397	0.2207	-0.0445	-1.6973	5.1188	-24.2869		6.828	0.2378	0.0231	1.5806	0.0043	-0.3735
6.89	6.2677	0.31	1.2921	6.3476	0.0546	-0.0203	2.1097	-0.7791	-4.6556		6.89	0.5894	5.4482	1.799	0.0024	5.7588	-0.0711	0.5869	1.5288	5.2343		6.875	-0.4915	-0.5768	5.4449	-0.0151	-0.0804	2.4541	2.7442	0.7595	2.0587		6.891	2.6732	0.6751	1.2882	1.529	0.2052	-0.0518	-1.7607	4.9265	-24.5591		6.89	0.2118	-0.0552	1.5741	-0.0128	-0.4869
6.953	6.2156	0.31	1.2856	6.2442	0.0739	-0.0058	2.1097	-1.8048	-4.5649		6.953	0.6025	5.3439	1.8185	0.0515	5.3205	-0.0904	0.3331	1.9134	5.5065		6.937	-0.4915	-0.6029	5.4774	-0.0379	-0.0366	2.5218	2.4904	0.2466	1.7865		6.953	2.6211	0.7012	1.2947	1.3808	0.2172	-0.0397	-1.9511	5.1188	-24.4684		6.953	0.2248	-0.1204	1.5871	0.006	-0.5848
7.015	6.1505	0.2969	1.2921	5.8359	0.1212	-0.0034	2.8076	-0.715	-3.839		7.015	0.5634	5.2787	1.7926	0.0409	5.0925	-0.0687	1.1579	2.1057	5.3251		7	-0.5176	-0.5899	5.5229	-0.0432	-0.0594	2.5677	2.3635	0.3748	1.9679		7.016	2.556	0.6751	1.3077	1.2615	0.2687	-0.0616	-2.0145	5.1829	-24.7406		7.015	0.1857	-0.1595	1.5871	-0.0111	-0.6809
7.078	6.0984	0.336	1.2726	5.4118	0.1142	-0.0155	2.9345	2.234	-3.9298		7.078	0.6415	5.2004	1.838	-0.0046	4.7663	-0.0687	1.9193	1.7211	5.3251		7.062	-0.4915	-0.5638	5.5749	-0.0291	-0.0524	2.645	2.4269	0.9518	1.8772		7.078	2.4518	0.6751	1.3207	1.1644	0.2808	-0.0494	-1.6338	5.4394	-24.5591		7.078	0.1727	-0.2769	1.5871	-0.0008	-0.7771
7.14	6.0072	0.323	1.2921	5.1209	0.1142	-0.0131	1.8559	1.9134	-2.7502		7.14	0.5764	5.1352	1.8185	0.0164	4.4823	-0.0566	2.0462	1.5929	4.9621		7.125	-0.5045	-0.5377	5.6204	-0.0134	-0.0611	2.7006	2.3	-0.0739	1.7865		7.141	2.3997	0.6751	1.3207	0.9975	0.2911	-0.047	-1.1897	6.0163	-25.8294		7.14	0.1727	-0.3682	1.5936	0.0111	-0.796
7.203	5.9681	0.323	1.2921	5.0649	0.1388	-0.0348	2.1097	0.3748	-2.1151		7.203	0.5894	5.0831	1.812	-0.0169	4.207	-0.0807	0.6503	2.1057	5.5973		7.187	-0.5045	-0.5377	5.6529	-0.0274	-0.0541	2.761	3.3152	0.8236	2.6938		7.203	2.3476	0.7142	1.3402	0.9464	0.2979	-0.0324	-1.38	5.6958	-25.3757		7.203	0.1597	-0.4464	1.5936	-0.0111	-0.8424
7.265	5.877	0.323	1.3051	4.7897	0.1335	-0.0034	2.4904	-0.3945	-2.478		7.265	0.6025	4.9918	1.838	-0.0029	3.8703	-0.0759	-0.3648	1.5929	5.3251		7.25	-0.4915	-0.5247	5.6919	-0.0695	-0.0331	2.8045	2.4904	0.6313	2.3309		7.266	2.2304	0.6751	1.3402	0.8646	0.2979	-0.0397	-1.3166	5.1188	-25.0128		7.265	0.1466	-0.5116	1.6001	-0.0042	-0.942
7.328	5.7858	0.323	1.2726	4.6268	0.1318	-0.0203	2.0462	-0.5868	-1.3892		7.328	0.5894	4.8874	1.8185	0.0585	3.6827	-0.0614	0.8407	1.4006	4.8714		7.312	-0.4915	-0.4986	5.7244	-0.0081	-0.0559	2.9012	2.7442	0.7595	1.9679		7.328	2.1523	0.6751	1.3402	0.7964	0.3014	-0.0445	-1.7607	5.0547	-25.3757		7.328	0.1076	-0.6029	1.6066	-0.0145	-1.1034
7.39	5.7077	0.31	1.2856	4.3534	0.1283	-0.0131	1.6021	-0.6509	-0.3912		7.39	0.5764	4.8092	1.812	0.0112	3.488	-0.0614	0.7772	1.3365	4.5085		7.375	-0.5045	-0.5116	5.7699	-0.0134	-0.0576	2.9277	1.6021	0.503	2.4216		7.391	2.0871	0.6751	1.3337	0.6499	0.2911	-0.0348	-1.5069	5.9522	-25.7386		7.39	0.1076	-0.6551	1.6066	-0.04	-1.2013
7.453	5.6556	0.31	1.3051	4.0538	0.1405	-0.03	2.0462	1.9775	-1.2078		7.453	0.5894	4.7049	1.812	0.0076	3.3548	-0.0614	1.4752	2.0416	5.4158		7.437	-0.5045	-0.4986	5.8154	-0.0081	-0.0488	2.9592	1.9193	0.3107	2.4216		7.453	1.996	0.6751	1.3467	0.5784	0.3014	-0.047	-1.5704	5.8881	-25.1942		7.453	0.0946	-0.7333	1.6131	-0.0128	-1.2631
7.515	5.5514	0.3491	1.2921	3.9311	0.116	-0.0276	1.9828	2.0416	-0.5726		7.515	0.5764	4.6657	1.812	-0.0081	3.2267	-0.0517	1.3483	2.0416	4.327		7.5	-0.5306	-0.4856	5.8609	-0.0081	-0.0524	3.0316	2.9345	0.4389	2.0587		7.516	1.9439	0.649	1.3532	0.4642	0.3168	-0.047	-1.2531	6.5933	-25.7386		7.515	0.0815	-0.8246	1.6196	-0.0128	-1.3593
7.578	5.4993	0.336	1.3116	3.7261	0.1142	-0.03	1.4117	0.9518	0.6977		7.578	0.5894	4.5875	1.8185	-0.0081	2.9883	-0.0711	1.4117	1.8493	4.5085		7.562	-0.5306	-0.4856	5.9194	-0.0116	-0.0734	3.0727	2.3	0.9518	1.9679		7.578	1.8527	0.6751	1.3467	0.4097	0.2893	-0.047	-1.8876	5.9522	-26.1016		7.578	0.0815	-0.8898	1.6196	-0.0281	-1.4606
7.64	5.4081	0.2969	1.3051	3.6139	0.1528	-0.0228	2.3	0.1825	-0.6634		7.64	0.6025	4.4962	1.8185	-0.0046	2.8269	-0.0324	0.7772	1.7211	4.5085		7.625	-0.5306	-0.4595	5.9389	-0.0029	-0.0541	3.1501	1.9828	0.1184	2.1494		7.641	1.7876	0.6621	1.3532	0.3654	0.31	-0.0591	-1.9511	6.401	-25.9201		7.64	0.0685	-0.9811	1.6196	-0.0281	-1.5705
7.703	5.33	0.31	1.3051	3.4948	0.1212	-0.0203	2.5538	0.1825	0.3347		7.703	0.6285	4.431	1.825	-0.0046	2.6656	-0.0566	0.3331	1.657	4.7807		7.687	-0.5045	-0.4595	5.9843	-0.0204	-0.026	3.2274	2.1097	0.8877	2.4216		7.703	1.7095	0.6882	1.3532	0.3075	0.2756	-0.0421	-1.7607	6.0804	-26.4645		7.703	0.0425	-1.0594	1.6066	-0.0366	-1.7337
7.765	5.2388	0.31	1.3181	3.2915	0.1458	-0.0276	2.2366	1.0159	0.244		7.765	0.5894	4.3528	1.8055	-0.0029	2.5692	-0.0493	0.1427	1.9775	4.0548		7.75	-0.5045	-0.4464	6.0168	-0.0029	-0.0401	3.2685	2.3	0.6954	2.0587		7.766	1.6313	0.6882	1.3597	0.2564	0.3134	-0.047	-1.2531	5.5676	-26.8274		7.765	0.0555	-1.1376	1.6196	-0.0281	-1.8281
7.828	5.2258	0.31	1.3116	3.0532	0.1318	-0.0155	1.4117	2.6186	0.0625		7.828	0.5894	4.2615	1.8185	0.0147	2.3658	-0.0542	0.0158	1.7211	4.0548		7.812	-0.4915	-0.4334	6.0558	-0.0204	-0.0401	3.341	2.9345	0.3107	1.9679		7.828	1.5402	0.6882	1.3467	0.2087	0.2996	-0.047	-1.8876	6.2087	-27.4626		7.828	0.0685	-1.2028	1.6131	-0.0247	-1.9689
7.89	5.1346	0.323	1.3181	2.8079	0.1072	-0.0276	1.1579	2.6186	0.4255		7.89	0.6155	4.1832	1.799	-0.0029	2.3202	-0.0542	-0.3648	1.3365	3.6919		7.875	-0.5306	-0.4464	6.0883	-0.0274	-0.0471	3.3893	1.7924	0.3107	2.4216		7.891	1.475	0.6751	1.3532	0.1678	0.2928	-0.0397	-2.078	6.401	-27.8255		7.89	0.0425	-1.3072	1.6066	-0.0093	-2.084
7.953	5.0565	0.323	1.3181	2.7325	0.123	-0.0252	1.4752	1.4006	0.6977		7.953	0.5894	4.1702	1.8055	-0.0046	2.1781	-0.0493	0.8407	1.4006	3.4197		7.937	-0.5045	-0.4595	6.1403	-0.0134	-0.0331	3.4473	1.5386	0.4389	1.8772		7.953	1.4099	0.6882	1.3597	0.0997	0.2859	-0.0421	-1.6338	6.3369	-26.5552		7.953	0.0425	-1.3724	1.5936	-0.0162	-2.2489
8.015	4.9914	0.323	1.3376	2.6221	0.1142	-0.0228	1.9193	1.08	0.1533		8.015	0.6025	4.0267	1.799	-0.0116	2.0133	-0.0517	-0.238	1.3365	3.4197		8	-0.5176	-0.4203	6.1728	-0.0309	-0.0646	3.5125	2.2366	0.3748	2.4216		8.016	1.3318	0.6751	1.3662	0.0503	0.3323	-0.0324	-1.3166	6.5292	-27.4626		8.015	0.0294	-1.4376	1.5936	-0.0196	-2.3553
8.078	4.9132	0.31	1.3376	2.559	0.1248	-0.0179	1.7924	-0.0739	0.7884		8.078	0.6025	3.9485	1.8055	0.0006	1.9449	-0.0493	0.2696	1.7211	3.2382		8.062	-0.5306	-0.4203	6.2053	-0.0029	-0.0506	3.5971	2.2366	0.503	1.8772		8.078	1.2536	0.6751	1.3597	0.0111	0.3168	-0.0397	-1.3166	6.1446	-27.3718		8.078	0.0034	-1.5158	1.5806	-0.0247	-2.546
8.14	4.8351	0.31	1.3376	2.4188	0.1212	-0.0058	1.6021	0.8877	1.5143		8.14	0.6025	3.8311	1.799	-0.0011	1.7959	-0.0759	-0.809	1.657	3.4197		8.125	-0.5566	-0.4073	6.2573	-0.0186	-0.0629	3.6503	2.1097	0.7595	2.2401		8.141	1.1625	0.6882	1.3467	-0.0281	0.2979	-0.0421	-1.5704	6.0163	-27.644		8.14	-0.0096	-1.6201	1.5611	-0.0196	-2.6988
8.203	4.783	0.31	1.3506	2.2436	0.1107	-0.0179	1.8559	1.7852	0.1533		8.203	0.5764	3.8181	1.799	-0.0186	1.7222	-0.0517	-0.1111	1.7211	2.6938		8.187	-0.5176	-0.4203	6.3093	-0.0204	-0.0576	3.6889	2.3	1.08	2.3309		8.203	1.0453	0.6621	1.3597	-0.0179	0.3014	-0.0421	-1.4435	6.1446	-27.8255		8.203	-0.0227	-1.6854	1.5416	-0.0213	-2.8173
8.265	4.7049	0.323	1.3441	2.0123	0.1037	-0.001	1.5386	1.9775	0.6977		8.265	0.5764	3.7007	1.8055	0.0041	1.6503	-0.0469	1.1579	1.9775	3.0567		8.25	-0.5176	-0.4073	6.3288	-0.0116	-0.0559	3.7783	1.4117	0.5672	2.4216		8.266	0.9932	0.6751	1.3597	-0.0315	0.3014	-0.0494	-1.2531	6.0804	-27.5533		8.265	-0.0617	-1.7506	1.5351	-0.0519	-2.9547
8.328	4.6267	0.31	1.3506	1.8914	0.116	-0.0155	0.9676	2.0416	1.2421		8.328	0.5894	3.6355	1.7731	-0.0186	1.5539	-0.0542	0.3331	1.7852	2.3309		8.312	-0.5306	-0.3943	6.3678	-0.0274	-0.0436	3.8605	2.3635	0.3748	2.0587		8.328	0.9281	0.6751	1.3662	-0.0928	0.3288	-0.0616	-1.6973	5.7599	-28.1884		8.328	-0.0748	-1.8418	1.5156	-0.0707	-3.1178
8.39	4.5225	0.31	1.3636	1.8441	0.1248	-0.0107	0.7772	1.2082	1.3328		8.39	0.5894	3.5572	1.799	-0.0169	1.5451	-0.0469	0.3331	2.0416	2.1494		8.375	-0.5436	-0.3943	6.3873	-0.0519	-0.0243	3.9209	2.2366	0.503	2.0587		8.391	0.8239	0.6751	1.3662	-0.115	0.3237	-0.0518	-1.8876	6.4651	-28.0977		8.39	-0.1008	-1.9331	1.5026	-0.0724	-3.3497
8.453	4.4444	0.336	1.3571	1.788	0.1388	-0.001	1.031	0.6954	1.1513		8.453	0.6285	3.5181	1.799	-0.0151	1.4978	-0.0421	1.729	1.657	1.9679		8.437	-0.5436	-0.3943	6.4523	-0.0186	-0.0453	3.9934	2.0462	0.6954	1.6957		8.453	0.7587	0.6882	1.3727	-0.1473	0.3185	-0.0445	-2.0145	6.7215	-27.9162		8.453	-0.1268	-1.9853	1.4831	-0.0656	-3.5283
8.515	4.3793	0.323	1.3636	1.6776	0.116	-0.0324	0.9041	1.08	0.6977		8.515	0.6025	3.4268	1.799	-0.0011	1.3891	-0.0493	1.729	1.0159	1.4235		8.5	-0.5436	-0.3943	6.4848	-0.0099	-0.0471	4.0441	2.3635	1.0159	1.9679		8.516	0.6676	0.6751	1.3857	-0.2019	0.3288	-0.0348	-1.8876	6.3369	-28.5514		8.515	-0.1659	-2.0766	1.4506	-0.057	-3.7223
8.578	4.3272	0.31	1.3506	1.5409	0.144	-0.0228	1.9193	1.8493	1.4235		8.578	0.6025	3.3355	1.799	-0.0116	1.2453	-0.0662	-0.1111	1.7211	1.8772		8.562	-0.5436	-0.3943	6.5238	-0.0064	-0.0471	4.1215	2.4269	0.4389	0.8791		8.578	0.5894	0.6751	1.3922	-0.1882	0.346	-0.0421	-2.1414	6.2087	-29.1865		8.578	-0.1659	-2.1548	1.4441	-0.0979	-3.9662
8.64	4.223	0.323	1.3701	1.4446	0.1423	-0.0276	1.0945	2.4263	1.5143		8.64	0.6285	3.2834	1.7731	0.0182	1.1488	-0.0445	-0.4917	1.7211	1.9679		8.625	-0.5566	-0.3943	6.5757	-0.0204	-0.0892	4.194	2.0462	0.0543	1.5143		8.641	0.4983	0.6621	1.3987	-0.195	0.322	-0.0397	-2.2049	6.5292	-28.6421		8.64	-0.1789	-2.2331	1.4247	-0.0247	-4.1087
8.703	4.1318	0.31	1.3831	1.3149	0.1353	-0.0155	0.8407	2.4263	1.4235		8.703	0.6285	3.166	1.7731	-0.0046	1.0629	-0.0566	0.1427	1.7211	-0.0282		8.687	-0.5566	-0.3943	6.6212	-0.0274	-0.0646	4.2882	2.2366	0.1184	1.8772		8.703	0.4332	0.6751	1.3922	-0.2002	0.3271	-0.0372	-1.6338	6.2087	-29.0051		8.703	-0.218	-2.2852	1.3987	-0.0639	-4.4505
8.765	4.0797	0.323	1.3831	1.2728	0.1774	-0.0058	1.729	2.4263	0.6977		8.765	0.6285	3.1008	1.7666	0.0006	1.012	-0.0542	-0.3014	1.7852	-0.3004		8.75	-0.5696	-0.3682	6.6667	-0.0309	-0.0716	4.3438	2.6807	0.8236	2.0587		8.766	0.355	0.6751	1.3987	-0.1933	0.3477	-0.0543	-2.1414	6.4651	-29.6402		8.765	-0.2571	-2.3505	1.3922	-0.0707	-4.6222
8.828	3.9886	0.323	1.3831	1.2378	0.1353	-0.0421	1.4117	1.9775	0.1533		8.828	0.6285	3.0095	1.7601	-0.0046	1.0068	-0.0517	0.3331	1.657	0.1533		8.812	-0.5696	-0.3812	6.7057	-0.0169	-0.0857	4.4477	2.5538	0.1825	1.605		8.828	0.2508	0.649	1.3987	-0.1984	0.3082	-0.0348	-1.7607	6.2087	-29.8217		8.828	-0.2701	-2.4287	1.3857	-0.103	-4.8541
8.89	3.8844	0.2839	1.4026	1.18	0.1511	-0.0397	1.1579	0.8236	-0.6634		8.89	0.6155	2.9313	1.7601	-0.0099	0.9735	-0.0542	0.5234	1.08	-0.6634		8.875	-0.5436	-0.3682	6.7512	-0.0081	-0.0594	4.5299	2.7442	0.3748	1.8772		8.891	0.1857	0.649	1.3987	-0.2274	0.334	-0.047	-1.6973	5.7599	-29.8217		8.89	-0.3222	-2.507	1.3792	-0.1337	-5.0224
8.953	3.8193	0.31	1.4026	1.1011	0.1353	-0.0179	1.5386	1.08	-0.0282		8.953	0.6155	2.866	1.7601	0.0024	0.9156	-0.0421	0.3331	1.4006	-0.5726		8.937	-0.5566	-0.3551	6.7902	-0.0362	-0.0524	4.6023	2.3635	0.1184	2.5123		8.953	0.0946	0.636	1.3987	-0.253	0.3254	-0.0445	-2.2049	6.5292	-30.6383		8.953	-0.3613	-2.5852	1.3662	-0.1507	-5.1563
9.015	3.7542	0.2969	1.4156	0.989	0.1528	-0.03	0.9041	1.5929	0.3347		9.015	0.5894	2.7617	1.7601	0.0094	0.7683	-0.0469	-0.4283	1.4006	-1.2078		9	-0.5827	-0.3551	6.8227	-0.0291	-0.0594	4.6821	2.8076	1.3365	2.0587		9.016	0.0164	0.623	1.4117	-0.3228	0.3203	-0.0543	-1.6973	6.9138	-29.8217		9.015	-0.3873	-2.6504	1.3532	-0.1627	-5.45
9.078	3.65	0.2839	1.4156	0.8663	0.1493	-0.0203	0.2696	2.4904	0.0625		9.078	0.6285	2.6704	1.7276	-0.0151	0.7262	-0.0372	-0.1745	2.1699	-1.6614		9.062	-0.5566	-0.3421	6.8812	-0.0081	-0.0699	4.7256	2.5538	0.0543	2.5123		9.078	-0.0617	0.636	1.4182	-0.3313	0.3323	-0.0494	-1.8876	6.2087	-30.2753		9.078	-0.4134	-2.7417	1.3597	-0.1763	-5.7351
9.14	3.5979	0.2969	1.4156	0.7927	0.1668	-0.0107	0.2062	2.2981	-0.2097		9.14	0.6676	2.6313	1.7341	0.0112	0.6719	-0.0566	-0.4283	2.1699	-1.2078		9.125	-0.5957	-0.3551	6.9202	-0.0204	-0.0716	4.8464	2.5538	0.3107	1.7865		9.141	-0.1399	0.623	1.4312	-0.3211	0.3082	-0.0616	-2.1414	7.3626	-31.3641		9.14	-0.4264	-2.7939	1.3532	-0.1576	-5.9119
9.203	3.5067	0.2839	1.4221	0.7314	0.1511	-0.0083	0.3965	2.6186	-0.0282		9.203	0.6155	2.5661	1.7146	-0.0134	0.6508	-0.0324	-0.1745	1.657	-2.1151		9.187	-0.5827	-0.3551	6.9657	-0.0379	-0.0751	4.8923	2.8076	0.8236	1.6957		9.203	-0.218	0.636	1.4312	-0.3671	0.3477	-0.0567	-2.078	6.7856	-31.0919		9.203	-0.4394	-2.8721	1.3402	-0.1456	-6.2125
9.265	3.4155	0.2839	1.4286	0.7541	0.1423	-0.0203	1.1579	1.08	-1.8429		9.265	0.6155	2.4226	1.7211	-0.0134	0.6473	-0.0614	-0.3014	1.2723	-2.2058		9.25	-0.5566	-0.3421	6.9982	-0.0379	-0.0787	4.9672	2.9345	1.08	1.8772		9.266	-0.2962	0.6099	1.4376	-0.3688	0.346	-0.0518	-1.6973	6.5292	-31.9993		9.265	-0.4655	-2.9634	1.3402	-0.1405	-6.4546
9.328	3.3114	0.2969	1.4351	0.7594	0.144	-0.0131	0.8407	0.6313	-1.7522		9.328	0.6285	2.3705	1.7211	-0.0029	0.6333	-0.03	-0.0476	1.5288	-3.6576		9.312	-0.5696	-0.3291	7.0372	-0.0169	-0.0787	5.0156	2.2366	1.0159	1.5143		9.328	-0.4003	0.623	1.4376	-0.345	0.3185	-0.0494	-1.8242	6.2728	-31.8178		9.328	-0.4655	-3.0156	1.3337	-0.1184	-6.6315
9.39	3.2593	0.2578	1.4286	0.677	0.1633	-0.03	0.1427	0.6954	-2.2966		9.39	0.6415	2.3314	1.7211	-0.0064	0.5877	-0.0517	0.2062	0.8877	-3.3854		9.375	-0.5696	-0.3551	7.0762	-0.0221	-0.0909	5.1267	2.8076	0.3107	1.9679		9.391	-0.4785	0.636	1.4312	-0.3211	0.3014	-0.0616	-2.0145	5.5676	-31.5456		9.39	-0.4915	-3.1068	1.3337	-0.1507	-6.7809
9.453	3.1811	0.2578	1.4286	0.614	0.1283	-0.0034	1.4117	1.5929	-2.0244		9.453	0.6155	2.2009	1.7146	-0.0099	0.5702	-0.0252	-0.3648	1.9775	-2.841		9.437	-0.5436	-0.3421	7.1152	-0.0081	-0.0664	5.1871	2.2366	-0.3945	2.3309		9.453	-0.5566	0.623	1.4312	-0.3654	0.2945	-0.0421	-1.5704	6.401	-31.6363		9.453	-0.5176	-3.1851	1.3272	-0.1627	-7.0918
9.515	3.116	0.2708	1.4546	0.4633	0.1739	-0.0179	0.0793	2.4263	-1.2985		9.515	0.6415	2.1357	1.7146	-0.0081	0.4667	-0.03	-0.238	2.234	-3.7483		9.5	-0.6087	-0.3421	7.1476	-0.0116	-0.0699	5.2693	3.4421	0.5672	1.9679		9.516	-0.5957	0.623	1.4376	-0.391	0.3203	-0.047	-2.2049	6.1446	-31.3641		9.515	-0.5566	-3.2503	1.3272	-0.2206	-7.4833
9.578	3.0639	0.2448	1.4481	0.3826	0.1563	-0.0107	0.0158	2.4904	-1.6614		9.578	0.6415	2.0444	1.6951	-0.0029	0.3808	-0.0517	-0.5552	1.1441	-4.3834		9.562	-0.5827	-0.3291	7.1931	0.0041	-0.0681	5.3321	2.6173	0.2466	1.3328		9.578	-0.7129	0.623	1.4312	-0.4352	0.3443	-0.0397	-1.8876	6.7215	-31.9993		9.578	-0.5566	-3.3286	1.3337	-0.1967	-7.6963
9.64	2.9727	0.2448	1.4676	0.3774	0.1686	-0.0131	0.1427	2.3622	-2.478		9.64	0.6285	2.0053	1.7016	-0.0239	0.4088	-0.0324	0.2696	1.7211	-4.202		9.625	-0.5957	-0.316	7.2191	-0.0134	-0.0611	5.378	2.5538	0.8236	2.4216		9.641	-0.778	0.636	1.4312	-0.4864	0.3134	-0.0421	-1.7607	7.7473	-32.1807		9.64	-0.5696	-3.4068	1.3337	-0.1661	-7.8165
9.703	2.8816	0.2448	1.4611	0.3739	0.1405	-0.0252	-0.5552	1.7852	-2.9317		9.703	0.6415	1.8749	1.6951	-0.0099	0.3562	-0.0542	-0.0476	1.5288	-4.5649		9.687	-0.5827	-0.316	7.2581	-0.0116	-0.0629	5.4916	3.3787	0.6313	1.605		9.703	-0.8562	0.623	1.4376	-0.5323	0.3288	-0.0421	-1.6338	6.978	-31.3641		9.703	-0.5696	-3.4459	1.3272	-0.1661	-7.5692
9.765	2.7774	0.2317	1.4871	0.3862	0.1493	0.0038	1.2214	1.0159	-3.839		9.765	0.6546	1.7967	1.6886	-0.0291	0.3475	-0.0397	-0.809	1.7852	-4.4742		9.75	-0.5957	-0.303	7.3036	-0.0239	-0.0471	5.552	1.8559	1.0159	2.2401		9.766	-0.9473	0.6099	1.4376	-0.4966	0.3237	-0.047	-1.5069	6.3369	-32.1807		9.765	-0.5827	-3.4459	1.3272	-0.1882	-6.9183
9.828	2.7123	0.2187	1.4871	0.3353	0.1686	-0.0034	0.5234	1.3365	-3.6576		9.828	0.6546	1.7054	1.6821	0.0164	0.3264	-0.0372	0.0158	1.9775	-4.8371		9.812	-0.5957	-0.2769	7.3296	-0.0239	-0.0646	5.5931	1.6021	0.7595	1.6957		9.828	-1.0515	0.6099	1.4441	-0.546	0.3082	-0.0445	-1.5704	6.2728	-31.6363		9.828	-0.5827	-3.4198	1.3142	-0.2615	-6.659
9.89	2.6211	0.1926	1.4871	0.3126	0.1493	-0.0107	0.1427	1.5929	-4.2927		9.89	0.6415	1.6532	1.6886	-0.0064	0.3632	-0.0445	-0.3014	1.1441	-6.0166		9.875	-0.5696	-0.3291	7.3881	-0.0169	-0.0681	5.7042	1.9828	0.1184	2.2401		9.891	-1.1297	0.6099	1.4441	-0.5221	0.2911	-0.0567	-2.2049	6.401	-32.09		9.89	-0.5827	-3.3546	1.3142	-0.2053	-6.252
9.953	2.5169	0.1926	1.5001	0.1916	0.1686	-0.0228	0.0793	2.6827	-4.3834		9.953	0.6285	1.5358	1.6886	-0.0204	0.3036	-0.0566	0.2062	1.4006	-6.3796		9.937	-0.6217	-0.2639	7.4206	-0.0011	-0.0453	5.7647	1.9193	0.5672	1.8772		9.953	-1.1817	0.623	1.4441	-0.5766	0.2979	-0.0616	-1.7607	6.3369	-32.5437		9.953	-0.5957	-3.2894	1.3077	-0.2308	-5.5977
10.015	2.4388	0.1926	1.5131	0.1741	0.1756	-0.0228	0.3965	1.9775	-4.3834		10.015	0.6285	1.4967	1.6691	-0.0011	0.2703	-0.0445	0.1427	1.3365	-6.8332		10	-0.5827	-0.2378	7.4531	-0.0064	-0.0471	5.8565	1.7924	0.4389	1.6957		10.016	-1.2469	0.636	1.4376	-0.6908	0.2996	-0.047	-2.3952	7.7473	-32.4529		10.015	-0.5436	-3.2112	1.3077	-0.2206	-4.976
10.078	2.3476	0.2056	1.5066	0.1251	0.1581	-0.0276	-0.238	2.1057	-4.9278		10.078	0.6285	1.3793	1.6756	-0.0029	0.2089	-0.0445	-0.7455	1.7211	-6.924		10.062	-0.5566	-0.2378	7.4921	-0.0046	-0.0488	5.9	1.2214	0.7595	2.3309		10.078	-1.338	0.623	1.4312	-0.7334	0.3151	-0.0421	-1.7607	7.7473	-32.09		10.078	-0.5957	-3.159	1.3012	-0.2444	-4.715
10.14	2.2695	0.1795	1.5326	0.1829	0.1458	-0.0058	0.7772	1.2082	-5.4722		10.14	0.6285	1.3272	1.6626	0.0094	0.1546	-0.0324	-0.0476	1.9134	-7.5591		10.125	-0.5957	-0.2508	7.5376	-0.0239	-0.0296	5.9991	1.6021	0.7595	3.1475		10.141	-1.4292	0.623	1.4376	-0.7691	0.3271	-0.0275	-1.7607	7.8755	-32.6344		10.14	-0.5827	-3.0938	1.3012	-0.2138	-4.2238
10.203	2.1653	0.1404	1.5326	0.1776	0.1405	-0.001	0.7138	1.4006	-5.1093		10.203	0.6415	1.2489	1.6691	0.0076	0.1423	-0.0372	0.0158	1.8493	-8.1035		10.187	-0.5957	-0.2378	7.5831	-0.0274	-0.0331	6.1078	2.3635	0.3748	2.3309		10.203	-1.5073	0.636	1.4312	-0.81	0.3306	-0.0348	-2.2049	7.1703	-32.1807		10.203	-0.5827	-3.0156	1.2947	-0.2206	-4.1173
10.265	2.1002	0.1404	1.5261	0.1724	0.1528	-0.0228	0.6503	0.8236	-6.1981		10.265	0.6415	1.1576	1.6561	0.0094	0.1335	-0.0493	-0.4283	2.2981	-8.0128		10.25	-0.5957	-0.2378	7.6286	-0.0256	-0.0453	6.1827	2.1731	0.9518	1.7865		10.266	-1.5855	0.623	1.4441	-0.7998	0.3168	-0.0348	-2.078	6.7856	-31.9085		10.265	-0.5566	-2.9373	1.2947	-0.207	-3.7739
10.328	2.022	0.1274	1.5456	0.1233	0.1493	-0.0228	0.8407	1.5288	-6.0166		10.328	0.6155	1.0924	1.6366	-0.0239	0.0476	-0.0566	-0.8724	1.3365	-8.5572		10.312	-0.6087	-0.2117	7.6676	-0.0309	-0.0436	6.2745	2.3635	0.3748	1.7865		10.328	-1.6766	0.636	1.4312	-0.8441	0.2859	-0.0543	-1.4435	6.9138	-32.9066		10.328	-0.5436	-2.833	1.2882	-0.1542	-3.3772
10.39	1.9309	0.1143	1.5521	0.0462	0.1598	-0.0203	-0.3014	2.2981	-5.7444		10.39	0.6285	1.0011	1.6431	-0.0134	-0.0015	-0.0372	-0.7455	1.3365	-9.0108		10.375	-0.6087	-0.2378	7.7196	-0.0274	-0.0506	6.347	1.5386	0.5672	1.7865		10.391	-1.7287	0.623	1.4312	-0.9463	0.2962	-0.0348	-1.8876	6.7215	-33.1788		10.39	-0.5045	-2.7547	1.2947	-0.1507	-3.0715
10.453	1.8918	0.0883	1.5651	0.0234	0.1756	-0.0131	0.46	2.2981	-5.2908		10.453	0.6285	0.9099	1.6301	-0.0046	-0.0243	-0.0372	-0.6186	1.4647	-9.1016		10.437	-0.5957	-0.2117	7.765	-0.0064	-0.0401	6.4268	2.4904	0.503	2.0587		10.453	-1.8459	0.623	1.4441	-1.0196	0.3357	-0.0397	-1.8242	7.8114	-32.4529		10.453	-0.4785	-2.7026	1.3012	-0.1593	-2.9564
10.515	1.8267	0.1274	1.5651	0.0637	0.1563	-0.0276	0.0158	1.9775	-6.1981		10.515	0.6415	0.8577	1.6301	-0.0011	0.0213	-0.0372	-0.5552	1.657	-10.4626		10.5	-0.5957	-0.2247	7.804	-0.0379	-0.0471	6.5138	1.8559	0.3748	1.5143		10.516	-1.898	0.636	1.4376	-1.0996	0.3237	-0.0251	-1.8876	7.8755	-32.7251		10.515	-0.4524	-2.6113	1.3077	-0.1576	-2.7521
10.578	1.7876	0.1013	1.5651	0.0532	0.1458	-0.0469	0.8407	1.0159	-7.0147		10.578	0.6415	0.7664	1.6366	0.0094	0.0178	-0.0397	0.0158	1.7211	-10.0089		10.562	-0.6478	-0.2117	7.856	-0.0274	-0.0436	6.6177	2.1731	0.3107	2.4216		10.578	-1.9892	0.6099	1.4376	-1.2019	0.3203	-0.0445	-2.3318	7.6831	-33.6325		10.578	-0.4524	-2.5461	1.3272	-0.1422	-2.5683
10.64	1.7616	0.0752	1.5651	0.0339	0.1581	-0.0324	-0.1111	0.8236	-6.7425		10.64	0.6155	0.6751	1.6496	0.0059	0.0388	-0.0372	0.46	1.5288	-10.9162		10.625	-0.6217	-0.1986	7.9145	-0.0327	-0.0278	6.7264	1.729	1.0159	2.4216		10.641	-2.0413	0.623	1.4312	-1.241	0.3357	-0.0445	-2.4587	7.4267	-33.2695		10.64	-0.4394	-2.4809	1.3402	-0.1371	-2.3021
10.703	1.7225	0.0752	1.5781	0.0129	0.1335	-0.0228	0.5234	1.9775	-6.1074		10.703	0.6415	0.5838	1.6301	0.0217	0.016	-0.0421	1.3483	1.1441	-9.5552		10.687	-0.6217	-0.1856	7.934	-0.0204	-0.0331	6.7844	2.5538	1.2082	2.1494		10.703	-2.1325	0.636	1.4376	-1.3075	0.3203	-0.047	-1.8876	7.619	-32.4529		10.703	-0.4394	-2.4026	1.3467	-0.1473	-2.1166
10.765	1.6574	0.0883	1.5716	-0.0151	0.144	-0.0324	0.1427	1.9775	-7.0147		10.765	0.6155	0.5056	1.6366	0.0094	-0.0769	-0.0469	-0.809	2.1699	-10.0089		10.75	-0.5957	-0.1986	7.9795	-0.0151	-0.0348	6.8617	1.9828	0.3748	2.0587		10.766	-2.2106	0.6099	1.4441	-1.3892	0.3786	-0.0445	-1.5069	6.8497	-33.3603		10.765	-0.4394	-2.3505	1.3727	-0.1507	-2.0067
10.828	1.6183	0.0622	1.5716	0.0164	0.137	-0.0372	0.9676	1.5288	-7.6498		10.828	0.6546	0.4143	1.6301	0.0076	-0.1278	-0.0348	-0.3014	1.7852	-10.0996		10.812	-0.6217	-0.1986	8.0185	-0.0291	-0.0453	6.9342	1.8559	0.2466	2.4216		10.828	-2.3018	0.6099	1.4441	-1.4966	0.3701	-0.0421	-2.0145	7.2344	-33.6325		10.828	-0.4264	-2.2461	1.3922	-0.1371	-1.9003
10.89	1.6183	0.0491	1.5781	-0.0029	0.1388	-0.0372	0.1427	1.3365	-6.7425		10.89	0.6415	0.323	1.6301	-0.0221	-0.2102	-0.0276	-0.6186	1.7211	-9.5552		10.875	-0.5957	-0.1856	8.0445	-0.0484	-0.0401	6.9898	2.2366	0.503	1.8772		10.891	-2.3539	0.623	1.4312	-1.6158	0.4147	-0.0372	-1.6973	7.8114	-33.5417		10.89	-0.4394	-2.1809	1.4052	-0.1473	-1.78
10.953	1.5662	0.0622	1.5846	0.0006	0.1563	-0.0252	0.46	2.0416	-7.0147		10.953	0.6546	0.2317	1.6366	-0.0046	-0.2242	-0.0324	-0.8724	1.4647	-10.0089		10.937	-0.6217	-0.1856	8.116	-0.0186	-0.0559	7.0865	2.6173	0.503	1.6957		10.953	-2.419	0.623	1.4312	-1.7232	0.3993	-0.0324	-2.2049	7.4267	-33.451		10.953	-0.4394	-2.0766	1.4247	-0.1439	-1.6117
11.015	1.5662	0.0491	1.5846	0.0129	0.1686	-0.0034	0.5869	2.1699	-7.4684		11.015	0.6415	0.2056	1.6366	0.0182	-0.2575	-0.0372	-0.8724	1.3365	-9.646		11	-0.6478	-0.1726	8.1355	-0.0151	-0.0348	7.1638	2.7442	0.2466	1.605		11.016	-2.4841	0.623	1.4312	-1.839	0.358	-0.0494	-1.6973	8.196	-34.5398		11.015	-0.4264	-1.9983	1.4376	-0.1456	-1.349
11.078	1.5402	0.0752	1.5781	-0.0081	0.137	-0.0252	0.3965	1.5929	-6.561		11.078	0.6415	0.1143	1.6366	-0.0151	-0.2417	-0.0397	-1.1897	1.657	-9.7367		11.062	-0.6217	-0.1986	8.181	-0.0379	-0.0506	7.2701	2.998	1.1441	2.2401		11.078	-2.5883	0.6099	1.4312	-1.914	0.3924	-0.0397	-1.9511	7.8114	-33.2695		11.078	-0.4394	-1.9462	1.4506	-0.1303	-1.2408
11.14	1.5402	0.0491	1.6041	0.0182	0.1353	-0.0155	0.5234	2.1057	-7.1962		11.14	0.6285	0.0491	1.6301	-0.0099	-0.2891	-0.0155	-0.1111	1.7211	-10.644		11.125	-0.6608	-0.1726	8.22	-0.0169	-0.0436	7.3354	2.8076	0.4389	1.3328		11.141	-2.6274	0.5969	1.4312	-2.0434	0.334	-0.0348	-2.3318	8.0678	-34.0861		11.14	-0.4264	-1.8549	1.4636	-0.1354	-1.1635
11.203	1.5532	0.0491	1.5911	-0.0151	0.1511	-0.0083	0.3331	2.4263	-7.1962		11.203	0.6155	-0.0552	1.6236	-0.0274	-0.261	-0.0397	-1.0628	1.5288	-8.9201		11.187	-0.6087	-0.1726	8.259	-0.0274	-0.0436	7.3909	2.2366	0.1184	1.2421		11.203	-2.7185	0.5969	1.4312	-2.1678	0.3735	-0.0421	-2.2049	7.4267	-33.5417		11.203	-0.4134	-1.7636	1.4701	-0.1133	-1.1206
11.265	1.475	0.0491	1.5781	-0.1588	0.1476	-0.0083	0.9676	3.3238	-7.8313		11.265	0.6155	-0.1595	1.6236	-0.0116	-0.2593	-0.0324	-0.5552	1.657	-8.3757		11.25	-0.6217	-0.1726	8.285	-0.0362	-0.0453	7.4973	3.0614	0.5672	1.7865		11.266	-2.7967	0.5838	1.4312	-2.2427	0.3598	-0.0348	-2.4587	6.7856	-34.2676		11.265	-0.4264	-1.6723	1.4831	-0.0979	-1.0193
11.328	1.3969	0.01	1.6171	-0.1518	0.1581	-0.0107	1.2214	3.0674	-7.4684		11.328	0.6415	-0.2117	1.6301	-0.0011	-0.2382	-0.0324	-0.5552	1.9134	-8.1035		11.312	-0.6478	-0.1726	8.3239	-0.0274	-0.0296	7.5601	2.2366	0.6313	1.5143		11.328	-2.8748	0.5447	1.4247	-2.3824	0.3598	-0.0324	-2.5856	6.7856	-33.9047		11.328	-0.4394	-1.6332	1.4961	-0.0962	-0.8664
11.39	1.3318	0.0231	1.6171	-0.1483	0.1511	-0.0034	0.46	2.8109	-8.1035		11.39	0.6415	-0.2899	1.6431	0.0076	-0.3312	-0.0421	-0.0476	1.4006	-7.7406		11.375	-0.6348	-0.1595	8.3629	-0.0134	-0.0401	7.6253	2.4904	0.1184	2.5123		11.391	-2.9269	0.5577	1.4312	-2.4864	0.4164	-0.0397	-1.5069	7.619	-33.7232		11.39	-0.4264	-1.5419	1.4896	-0.0877	-0.6689
11.453	1.2276	-0.003	1.6106	-0.0677	0.1686	0.0135	0.5869	0.7595	-7.6498		11.453	0.6285	-0.3812	1.6431	-0.0029	-0.3592	-0.0252	0.1427	1.4647	-8.3757		11.437	-0.6348	-0.1595	8.4084	-0.0397	-0.0524	7.6833	2.6173	0.7595	1.7865		11.453	-3.005	0.5447	1.4312	-2.6295	0.389	-0.0275	-2.7759	7.2344	-34.3583		11.453	-0.4134	-1.4506	1.4896	-0.0877	-0.614
11.515	1.1495	-0.003	1.6301	-0.0607	0.1265	-0.0131	0.2062	0.3748	-8.0128		11.515	0.6415	-0.4725	1.6366	0.0112	-0.4188	-0.0348	-0.4917	1.7211	-8.4664		11.5	-0.6608	-0.1726	8.4279	-0.0397	-0.0594	7.6857	2.6173	0.3748	1.605		11.516	-3.0702	0.5186	1.4312	-2.8117	0.3426	-0.0275	-2.5856	7.6831	-34.4491		11.515	-0.4264	-1.3724	1.5026	-0.0962	-0.571
11.578	1.0322	-0.0161	1.6366	-0.0922	0.1546	0.0038	0.7772	0.9518	-8.3757		11.578	0.6676	-0.5247	1.6236	0.0497	-0.5241	-0.0228	-0.1111	1.7211	-10.0996		11.562	-0.6348	-0.1465	8.4019	-0.0011	-0.0243	7.4272	2.3635	0.2466	0.7884		11.578	-3.1483	0.5317	1.4312	-2.9668	0.4096	-0.0324	-2.7759	7.7473	-34.9935		11.578	-0.4264	-1.3202	1.4961	-0.1048	-0.4766
11.64	0.9541	-0.0291	1.6236	-0.08	0.1248	-0.0131	0.2696	0.6954	-9.283		11.64	0.6285	-0.616	1.6431	0.0444	-0.5924	-0.0445	-0.4917	1.5929	-10.5533		11.625	-0.6348	-0.1726	8.3629	-0.0484	-0.0225	7.2363	2.4269	0.3107	2.1494		11.641	-3.2134	0.5056	1.4312	-3.1031	0.413	-0.0372	-2.2049	8.196	-34.812		11.64	-0.4394	-1.2028	1.5026	-0.0775	-0.4148
11.703	0.902	-0.0422	1.6236	-0.1711	0.1353	-0.0252	0.9041	1.8493	-9.1923		11.703	0.6415	-0.6812	1.6171	0.0374	-0.624	-0.0348	-0.5552	2.0416	-10.5533		11.687	-0.6348	-0.1465	8.311	-0.0204	-0.019	7.055	1.4117	0.3107	0.8791		11.703	-3.2655	0.5186	1.4247	-3.2325	0.413	-0.0275	-2.078	8.196	-34.7213		11.703	-0.4394	-1.1507	1.5156	-0.0536	-0.2808
11.765	0.8239	-0.0422	1.6431	-0.2534	0.1546	-0.0228	0.2696	2.7468	-9.1016		11.765	0.6155	-0.7985	1.6301	-0.0046	-0.6836	-0.0203	-0.8724	2.3622	-9.646		11.75	-0.6608	-0.1465	8.298	-0.0414	-0.0085	6.9342	2.0462	0.6954	1.9679		11.766	-3.3306	0.4925	1.4312	-3.4148	0.4388	-0.0275	-1.38	8.5166	-35.0842		11.765	-0.4394	-1.0463	1.5156	-0.0588	-0.1829
11.828	0.7457	-0.0552	1.6626	-0.257	0.1195	-0.0179	0.3331	2.6827	-9.283		11.828	0.6546	-0.8638	1.6301	0.0339	-0.7047	-0.0662	-0.809	1.5288	-10.7348		11.812	-0.6087	-0.1465	8.272	-0.0379	-0.0015	6.7192	2.5538	0.3107	0.5162		11.828	-3.4088	0.4795	1.4247	-3.5017	0.3924	-0.0421	-2.4587	8.8371	-34.9027		11.828	-0.4524	-0.9942	1.5026	-0.0605	-0.0953
11.89	0.6415	-0.0422	1.6626	-0.2254	0.1616	-0.0348	0.8407	2.5545	-9.4645		11.89	0.6285	-0.9159	1.6366	0.0112	-0.7731	-0.0324	-0.3648	2.1057	-10.4626		11.875	-0.6608	-0.1465	8.2265	-0.0362	-0.0068	6.6128	2.2366	0.3748	0.6977		11.891	-3.4739	0.4795	1.4247	-3.7232	0.389	-0.0518	-2.9028	8.773	-35.9008		11.89	-0.4394	-0.9159	1.5091	-0.0417	-0.0455
11.953	0.5764	-0.0813	1.6561	-0.1939	0.1405	-0.001	0.7138	2.4263	-10.4626		11.953	0.6155	-0.9681	1.6236	0.048	-0.88	-0.0228	-0.9993	2.6186	-10.9162		11.937	-0.6608	-0.1595	8.194	-0.0397	0.0003	6.4872	2.8076	0.6954	1.0606		11.953	-3.552	0.4534	1.4247	-3.7964	0.425	-0.0324	-2.1414	8.5166	-34.9027		11.953	-0.4394	-0.8507	1.5091	-0.0383	-0.0146
12.015	0.5113	-0.0422	1.6626	-0.1956	0.1212	-0.0083	1.2214	1.1441	-10.3718		12.015	0.6155	-1.0855	1.6171	0.0497	-0.8958	-0.0203	-0.4283	2.0416	-10.7348		12	-0.6217	-0.1465	8.142	-0.0186	-0.0103	6.3059	2.3635	0.3748	0.3347		12.016	-3.6302	0.4665	1.4376	-3.9276	0.4302	-0.0543	-2.7125	7.6831	-35.4471		12.015	-0.4264	-0.7464	1.5091	-0.0673	0.0077
12.078	0.3941	-0.0813	1.6561	-0.2394	0.137	0.0014	0.46	1.9134	-10.1904		12.078	0.6025	-1.1637	1.6171	0.0444	-0.9817	-0.0421	-0.9993	1.9775	-10.644		12.062	-0.6348	-0.1726	8.103	-0.0327	0.0003	6.1803	2.7442	0.6313	0.9699		12.078	-3.6823	0.4404	1.4312	-4.0673	0.3924	-0.0275	-2.9028	8.5166	-35.8101		12.078	-0.4264	-0.6812	1.5091	-0.057	0.0764
12.14	0.316	-0.1074	1.6496	-0.2377	0.1142	-0.0083	0.2062	2.4263	-10.644		12.14	0.5634	-1.2289	1.6106	0.0269	-1.0554	-0.03	-1.1897	1.5288	-11.9143		12.125	-0.6217	-0.1595	8.0705	-0.0589	0.023	6.0136	2.1731	0.1825	1.2421		12.141	-3.7604	0.4143	1.4247	-4.2887	0.4508	-0.0348	-2.649	8.3883	-34.9935		12.14	-0.4264	-0.6029	1.5091	-0.0622	0.1262
12.203	0.2378	-0.0682	1.6496	-0.3463	0.1353	-0.0083	0.9041	3.0033	-10.9162		12.203	0.5504	-1.2811	1.6236	0.0444	-1.0519	-0.0252	-1.1897	1.7852	-10.7348		12.187	-0.6348	-0.1856	8.0315	-0.0362	0.0073	5.8662	2.5538	-0.0739	0.1533		12.203	-3.8125	0.4013	1.4312	-4.4114	0.3821	-0.03	-2.649	9.1576	-36.3545		12.203	-0.4394	-0.5116	1.5091	-0.023	0.2103
12.265	0.1727	-0.0813	1.6496	-0.3376	0.1335	-0.0107	0.9676	2.6827	-11.2792		12.265	0.5113	-1.3854	1.5911	0.0444	-1.1466	-0.0252	0.2696	1.7211	-10.8255		12.25	-0.6087	-0.1465	7.999	-0.0239	0.0125	5.7502	2.5538	0.0543	0.6977		12.266	-3.8776	0.4013	1.4247	-4.5852	0.4199	-0.0275	-2.7125	8.8371	-36.0823		12.265	-0.4394	-0.4464	1.5026	-0.0366	0.2928
12.328	0.1206	-0.0943	1.6626	-0.3358	0.1423	0.0014	1.031	2.7468	-10.7348		12.328	0.4853	-1.4767	1.6106	0.0059	-1.1957	-0.0179	-1.2531	1.7211	-11.5514		12.312	-0.6348	-0.1595	7.9535	-0.0484	0.0195	5.6052	1.7924	0.8236	0.3347		12.328	-3.9427	0.3882	1.4247	-4.7061	0.48	-0.0372	-2.649	8.5166	-35.8101		12.328	-0.4264	-0.3421	1.5026	-0.0417	0.3563
12.39	0.0164	-0.0943	1.6561	-0.3709	0.1353	-0.0034	1.031	2.234	-11.0977		12.39	0.4462	-1.5158	1.6171	0.0094	-1.2728	0.0038	-0.9993	2.234	-10.9162		12.375	-0.6478	-0.1465	7.9015	-0.0484	0.002	5.4505	1.8559	0.503	1.0606		12.391	-4.0078	0.3752	1.4312	-4.9054	0.4061	-0.0372	-2.8394	8.9653	-36.3545		12.39	-0.4264	-0.2899	1.4961	-0.0417	0.3495
12.453	-0.0617	-0.0943	1.6496	-0.3393	0.1353	0.0062	0.5234	1.9775	-12.4587		12.453	0.4201	-1.6332	1.6041	0.0322	-1.3412	-0.0203	-0.809	1.657	-11.4606		12.437	-0.6217	-0.1595	7.856	-0.0344	0.002	5.3055	1.6655	0.5672	0.4255		12.453	-4.086	0.3621	1.4312	-5.0911	0.4765	-0.0372	-2.9028	8.9012	-36.0823		12.453	-0.4394	-0.1986	1.5026	-0.0315	0.401
12.515	-0.1399	-0.0813	1.6496	-0.3481	0.109	-0.0228	0.0793	2.0416	-11.5514		12.515	0.3941	-1.7114	1.5846	0.0094	-1.4096	-0.03	-1.4435	2.1699	-11.6421		12.5	-0.6348	-0.1595	7.817	-0.0291	0.0143	5.2282	1.729	1.2723	0.6977		12.516	-4.1771	0.336	1.4182	-5.2376	0.48	-0.0348	-2.8394	8.8371	-36.2637		12.515	-0.4394	-0.1334	1.4961	-0.0605	0.4714
12.578	-0.2441	-0.0813	1.6431	-0.3709	0.1248	-0.0155	1.5386	1.8493	-11.7328		12.578	0.368	-1.8027	1.5781	-0.0011	-1.5183	-0.0493	-1.6338	1.4647	-11.9143		12.562	-0.6348	-0.1334	7.778	-0.0449	0.0336	5.1001	1.5386	0.5672	0.244		12.578	-4.2292	0.336	1.4312	-5.437	0.5092	-0.0324	-2.7125	8.5807	-35.1749		12.578	-0.4264	-0.0291	1.5091	-0.0349	0.5109
12.64	-0.3352	-0.1074	1.6561	-0.4182	0.1195	-0.0155	0.5869	2.8109	-12.368		12.64	0.3029	-1.9071	1.5781	0.0164	-1.5183	-0.0348	-0.809	1.657	-11.0977		12.625	-0.6348	-0.1465	7.7325	-0.0344	0.0125	4.9648	1.5386	0.6954	0.7884		12.641	-4.3074	0.336	1.4182	-5.5443	0.4731	-0.047	-3.4739	8.7089	-35.9008		12.64	-0.4394	0.0361	1.4896	-0.0247	0.559
12.703	-0.4003	-0.1074	1.6431	-0.4392	0.0949	-0.001	0.7138	2.5545	-11.9143		12.703	0.316	-1.9592	1.5911	0.0129	-1.6025	-0.0421	-1.8242	1.657	-11.6421		12.687	-0.6478	-0.1465	7.7066	-0.0695	0.023	4.8488	1.2848	0.9518	0.6977		12.703	-4.3465	0.323	1.4312	-5.7419	0.48	-0.0494	-3.347	9.4782	-36.3545		12.703	-0.4394	0.1143	1.4961	-0.0383	0.5864
12.765	-0.4785	-0.0943	1.6301	-0.4725	0.1142	-0.0131	0.2062	2.5545	-12.0051		12.765	0.342	-2.0635	1.5716	0.0041	-1.6042	-0.0324	-0.9993	2.1057	-12.1865		12.75	-0.6217	-0.1334	7.6546	-0.0309	0.0195	4.7208	1.9193	0.6954	0.244		12.766	-4.4246	0.31	1.4312	-5.8986	0.5109	-0.0445	-3.0932	9.991	-35.5379		12.765	-0.4394	0.2056	1.4896	-0.0162	0.6088
12.828	-0.5827	-0.0813	1.6106	-0.497	0.0967	-0.0058	0.2696	2.875	-12.0958		12.828	0.3029	-2.1288	1.5521	0.0304	-1.6901	-0.0155	-0.809	2.2981	-11.0977		12.812	-0.6348	-0.1595	7.6026	-0.0677	0.0213	4.5975	2.1097	0.7595	0.6069		12.828	-4.4897	0.2839	1.4312	-6.0673	0.5504	-0.03	-2.649	9.0294	-36.3545		12.828	-0.4394	0.2839	1.4831	-0.0383	0.6139
12.89	-0.6348	-0.0943	1.5976	-0.504	0.1283	0.0014	1.3483	2.2981	-12.2773		12.89	0.342	-2.1809	1.5521	0.0164	-1.7778	-0.0203	-0.3648	1.9775	-12.368		12.875	-0.6217	-0.1595	7.5701	-0.0519	0.0371	4.4791	2.1731	0.5672	-0.5726		12.891	-4.5548	0.2708	1.4247	-6.2206	0.5229	-0.0324	-2.9663	8.0678	-35.8101		12.89	-0.4394	0.3752	1.4831	-0.0451	0.6517
12.953	-0.7129	-0.0943	1.6041	-0.5338	0.109	-0.03	0.1427	2.6186	-12.7309		12.953	0.329	-2.2983	1.5456	0.0269	-1.9356	-0.0397	-1.8242	2.0416	-12.6402		12.937	-0.6478	-0.1726	7.5246	-0.0642	0.0248	4.4187	1.4752	0.1184	0.0625		12.953	-4.6199	0.2448	1.4247	-6.3756	0.5143	-0.03	-2.7125	9.35	-36.6267		12.953	-0.4524	0.4273	1.4636	-0.023	0.7565
13.015	-0.8041	-0.0552	1.5846	-0.5654	0.109	-0.0058	1.3483	2.2981	-11.9143		13.015	0.329	-2.3896	1.5326	0.0444	-1.9777	-0.0276	-1.2531	1.7211	-12.368		13	-0.6217	-0.1334	7.4791	-0.0607	0.0423	4.2979	1.6655	0.5672	-0.3004		13.016	-4.7241	0.2056	1.4376	-6.5818	0.492	-0.0372	-3.347	9.991	-36.3545		13.015	-0.4524	0.5317	1.4571	-0.0264	0.832
13.078	-0.8692	-0.0943	1.5781	-0.5759	0.0844	-0.03	1.0945	1.9134	-12.368		13.078	0.329	-2.4287	1.5391	0.0427	-2.0356	-0.0469	-1.2531	1.9775	-12.4587		13.062	-0.6348	-0.1856	7.4401	-0.0344	0.0371	4.1843	2.1097	0.503	-0.119		13.078	-4.7762	0.2056	1.4312	-6.7845	0.4868	-0.0397	-3.4104	9.5423	-35.7193		13.078	-0.4264	0.6099	1.4441	-0.0298	0.8355
13.14	-0.9603	-0.0682	1.5651	-0.6319	0.0949	-0.0155	0.0158	3.0033	-11.9143		13.14	0.355	-2.52	1.5326	-0.0011	-2.1285	-0.0276	-1.6338	2.1057	-12.5495		13.125	-0.6217	-0.1595	7.3881	-0.0712	0.0494	4.0901	1.2848	0.4389	-0.0282		13.141	-4.8544	0.1795	1.4312	-6.9668	0.5504	-0.03	-3.2201	9.35	-35.9008		13.14	-0.4134	0.6882	1.4441	-0.0315	0.9127
13.203	-1.0255	-0.0943	1.5586	-0.6582	0.1002	-0.0058	1.031	2.4904	-12.5495		13.203	0.329	-2.6113	1.5196	0.0637	-2.232	-0.0228	-0.8724	1.9775	-12.8217		13.187	-0.6087	-0.1465	7.3621	-0.0432	0.0318	3.9765	1.6655	0.4389	-0.3912		13.203	-4.9325	0.1665	1.4247	-7.1695	0.4834	-0.0494	-4.1084	8.8371	-36.4452		13.203	-0.4134	0.7664	1.4312	-0.0298	0.9282
13.265	-1.1427	-0.1074	1.5586	-0.6968	0.0721	-0.0083	0.3331	2.6827	-12.5495		13.265	0.329	-2.7156	1.5261	0.048	-2.4021	-0.0397	-2.3318	2.2981	-13.0031		13.25	-0.6087	-0.1856	7.3231	-0.0379	0.0441	3.8895	1.031	-0.3304	-0.119		13.266	-5.0107	0.1535	1.4247	-7.4182	0.48	-0.03	-3.0932	8.8371	-36.3545		13.265	-0.4134	0.8316	1.4247	-0.0196	1.0175
13.328	-1.1817	-0.1074	1.5456	-0.7371	0.0599	-0.0228	0.5234	2.4904	-12.8217		13.328	0.342	-2.7808	1.5001	0.0357	-2.495	-0.0469	-2.3318	2.2981	-12.5495		13.312	-0.5696	-0.1595	7.2841	-0.0362	0.0458	3.7856	1.4117	0.5672	-0.9356		13.328	-5.0758	0.1274	1.4312	-7.546	0.5676	-0.047	-3.4739	8.8371	-36.3545		13.328	-0.4264	0.9229	1.4117	-0.0315	1.1154
13.39	-1.2599	-0.1074	1.5391	-0.7897	0.0739	0.0014	0.7772	3.0033	-12.2773		13.39	0.316	-2.8721	1.5066	0.062	-2.5669	-0.0421	-1.3166	2.2981	-12.7309		13.375	-0.6087	-0.1595	7.2321	-0.0467	0.0458	3.6913	1.4752	0.503	0.1533		13.391	-5.1669	0.1143	1.4247	-7.6959	0.4886	-0.0421	-3.0932	9.7346	-36.4452		13.39	-0.3743	1.0011	1.3987	-0.0093	1.2167
13.453	-1.3511	-0.0943	1.5131	-0.8405	0.0757	-0.0252	0.2062	2.9392	-12.2773		13.453	0.3029	-2.9112	1.4936	0.062	-2.5774	-0.0228	-0.3014	2.1699	-13.2753		13.437	-0.5957	-0.1856	7.2126	-0.0484	0.023	3.5947	0.7138	0.2466	0.1533		13.453	-5.206	0.1274	1.4376	-7.6039	0.5332	-0.0372	-2.4587	7.5549	-34.9935		13.453	-0.4003	1.0924	1.3857	-0.0536	1.3369
13.515	-1.4552	-0.1074	1.5066	-0.8703	0.0494	-0.0107	0.6503	2.6186	-11.9143		13.515	0.2899	-3.0025	1.5066	0.0742	-2.737	-0.0397	-1.3166	2.0416	-13.0939		13.5	-0.5827	-0.1595	7.1606	-0.0695	0.0686	3.5367	1.2214	-0.0098	-0.5726		13.516	-5.2321	0.0883	1.4247	-7.471	0.4886	-0.0494	-2.9028	7.7473	-34.5398		13.515	-0.3873	1.1707	1.3727	-0.0213	1.4623
13.578	-1.5204	-0.0943	1.4806	-0.8755	0.0686	0.0087	1.2214	2.8109	-12.6402		13.578	0.2899	-3.0938	1.5001	0.062	-2.7808	-0.0252	-1.4435	2.2981	-12.6402		13.562	-0.5696	-0.1726	7.1217	-0.08	0.0616	3.4594	1.1579	0.6954	-0.119		13.578	-5.193	0.0883	1.4312	-6.914	0.4319	-0.0324	-2.9663	7.0421	-32.2715		13.578	-0.3743	1.2359	1.3597	-0.057	1.6357
13.64	-1.5985	-0.0552	1.4676	-0.893	0.0476	-0.0131	1.4117	2.6186	-12.6402		13.64	0.329	-3.1329	1.4676	0.062	-2.9457	-0.0228	-2.078	2.4263	-12.6402		13.625	-0.6087	-0.1726	7.1087	-0.0467	0.0739	3.3724	1.2214	0.503	-0.119		13.641	-5.1279	0.0883	1.4376	-6.4847	0.3495	-0.0324	-2.2049	6.9138	-31.9993		13.64	-0.3482	1.3402	1.3532	-0.0298	1.7456
13.703	-1.6766	-0.0943	1.4481	-0.9579	0.0423	-0.0228	0.5234	2.4904	-12.4587		13.703	0.2899	-3.2503	1.4676	0.069	-3.0509	-0.0445	-2.078	2.1699	-13.0939		13.687	-0.5696	-0.1726	7.0437	-0.0467	0.0388	3.2975	1.6021	0.7595	-1.48		13.703	-5.0758	0.0752	1.4376	-6.3722	0.3323	-0.047	-2.4587	8.4524	-29.6402		13.703	-0.3482	1.3924	1.3467	0.0213	1.938
13.765	-1.7548	-0.0682	1.4416	-1.0437	0.0511	-0.0203	0.7138	2.2981	-13.0939		13.765	0.3029	-3.2894	1.4806	0.0707	-3.1228	-0.0107	-1.6338	1.8493	-13.2753		13.75	-0.5827	-0.1595	7.0047	-0.094	0.0406	3.2056	1.729	1.0159	-0.5726		13.766	-4.9846	0.0883	1.4247	-5.9446	0.3443	-0.03	-1.6973	6.5292	-29.8217		13.765	-0.3482	1.4837	1.3402	-0.0162	2.1132
13.828	-1.8459	-0.1074	1.4221	-1.1051	0.0213	-0.0034	0.5869	3.1956	-12.5495		13.828	0.2508	-3.3938	1.4546	0.0567	-3.2736	-0.0203	-2.078	1.9134	-13.1846		13.812	-0.5957	-0.1465	6.9852	-0.0484	0.0511	3.1452	1.5386	0.4389	-0.7541		13.828	-4.9325	0.0883	1.4312	-5.6329	0.2705	-0.0397	-2.3318	5.6317	-28.8236		13.828	-0.3352	1.5358	1.3207	-0.0281	2.3038
13.89	-1.898	-0.0813	1.4156	-1.1734	0.0406	-0.0083	1.4117	3.0033	-12.7309		13.89	0.1987	-3.459	1.4481	0.062	-3.4682	-0.0179	-1.7607	2.1057	-13.3661		13.875	-0.5696	-0.1465	6.9462	-0.0186	0.0774	3.0413	1.3483	0.503	-1.117		13.891	-4.8804	0.1013	1.4312	-5.3876	0.243	-0.0324	-1.1897	6.0163	-28.0977		13.89	-0.3222	1.601	1.3207	-0.0264	2.594
13.953	-2.0022	-0.0813	1.4026	-1.2663	0.0529	-0.001	1.0945	3.3238	-12.9124		13.953	0.1857	-3.5503	1.4481	0.048	-3.5033	-0.0252	-2.2683	1.8493	-13.6383		13.937	-0.5436	-0.1856	6.9007	-0.0362	0.0634	3.0099	1.3483	1.0159	0.6069		13.953	-4.8023	0.0883	1.4312	-5.1116	0.2327	-0.0275	-2.2683	6.7215	-27.1904		13.953	-0.3222	1.6923	1.3142	-0.0196	2.8688
14.015	-2.0673	-0.0813	1.3896	-1.2961	0.0266	-0.001	1.5386	3.2597	-13.6383		14.015	0.1987	-3.6415	1.4286	0.048	-3.6155	-0.0397	-1.5704	1.657	-14.1827		14	-0.5436	-0.1726	6.8552	-0.0397	0.0739	2.9012	1.4752	0.1184	-0.9356		14.016	-4.7632	0.1013	1.4312	-4.7981	0.2155	-0.0372	-1.1897	5.3753	-26.7367		14.015	-0.3092	1.7575	1.3142	-0.0111	3.214
14.078	-2.1325	-0.0943	1.3896	-1.3837	0.0266	0.0038	1.7924	3.3879	-13.2753		14.078	0.1597	-3.7198	1.4351	0.0409	-3.6927	-0.0083	-0.809	1.657	-14.8178		14.062	-0.5306	-0.1465	6.8032	-0.0572	0.0879	2.8263	1.2848	0.3107	-0.4819		14.078	-4.672	0.1143	1.4376	-4.609	0.231	-0.0251	-1.1897	5.6317	-26.1923		14.078	-0.3092	1.8227	1.3077	-0.0025	3.5008
14.14	-2.2367	-0.0682	1.3766	-1.4678	0.016	-0.0034	0.5234	3.1315	-13.1846		14.14	0.1466	-3.8111	1.4221	0.0532	-3.8628	0.0111	-1.3166	2.4263	-14.4549		14.125	-0.5045	-0.1334	6.7707	-0.0449	0.0757	2.761	1.2214	0.503	-1.2078		14.141	-4.6069	0.1013	1.4247	-4.4591	0.1897	-0.0348	-0.7455	5.5676	-26.0108		14.14	-0.2831	1.888	1.3077	0.006	3.7326
14.203	-2.2887	-0.0682	1.3571	-1.5134	-0.0015	0.0111	0.7772	3.1315	-13.9105		14.203	0.1336	-3.8502	1.3896	0.0462	-3.982	-0.001	-1.0628	2.1699	-13.6383		14.187	-0.5436	-0.1856	6.7187	-0.0624	0.0686	2.6933	1.8559	0.3748	-1.6614		14.203	-4.5418	0.1013	1.4312	-4.1235	0.2086	-0.0372	-0.809	4.0931	-25.1942		14.203	-0.2831	1.9532	1.3077	-0.0076	4.052
14.265	-2.3799	-0.0943	1.3636	-1.6115	0.002	-0.001	0.7138	2.9392	-14.0012		14.265	0.1597	-3.9676	1.3896	0.0374	-4.1521	-0.0179	-2.078	2.4263	-14.4549		14.25	-0.5306	-0.1726	6.6732	-0.0519	0.0897	2.6039	1.7924	0.6954	-1.9336		14.266	-4.4897	0.1013	1.4312	-3.9463	0.1812	-0.0421	-1.1897	4.0931	-26.1016		14.265	-0.2701	2.0184	1.3012	-0.0145	4.3165
14.328	-2.4581	-0.1074	1.3376	-1.7131	-0.0296	-0.0083	0.7772	3.5161	-12.8217		14.328	0.1206	-4.0328	1.3961	0.0655	-4.3029	-0.0203	-2.2683	2.3622	-12.9124		14.312	-0.5176	-0.1595	6.6342	-0.0484	0.0967	2.5387	1.729	0.3748	-1.6614		14.328	-4.4246	0.1274	1.4312	-3.7623	0.188	-0.0397	-1.1897	4.2213	-25.3757		14.328	-0.2441	2.0705	1.3077	0.0315	4.696
14.39	-2.5232	-0.0943	1.3246	-1.8253	-0.0506	-0.001	0.6503	3.7726	-13.6383		14.39	0.1466	-4.098	1.3961	0.055	-4.3555	-0.0179	-2.3318	2.6827	-14.1827		14.375	-0.5436	-0.1595	6.5887	-0.0502	0.0809	2.4541	1.0945	0.1184	-1.2078		14.391	-4.3465	0.1274	1.4312	-3.5426	0.1897	-0.03	-0.1111	4.6701	-25.1942		14.39	-0.231	2.1357	1.3142	0.052	4.933
14.453	-2.5883	-0.0943	1.3311	-1.9059	-0.0155	-0.0034	0.8407	3.5802	-13.5475		14.453	0.1336	-4.1632	1.3766	0.0707	-4.4309	-0.0058	-2.2683	1.9775	-13.9105		14.437	-0.5176	-0.1595	6.5432	-0.0449	0.0651	2.384	0.9041	0.5672	-1.9336		14.453	-4.2683	0.1404	1.4376	-3.3637	0.1777	-0.0372	-1.2531	5.0547	-25.1035		14.453	-0.205	2.214	1.3077	0.052	5.2456
14.515	-2.6794	-0.0813	1.3116	-1.9637	-0.0243	0.0038	0.9676	4.0931	-14.0919		14.515	0.1336	-4.2675	1.3896	0.0602	-4.6308	-0.0034	-2.649	3.0033	-14.2734		14.5	-0.4915	-0.1986	6.4978	-0.0467	0.0704	2.3236	1.6655	1.08	-1.8429		14.516	-4.2162	0.1404	1.4247	-3.2342	0.1949	-0.0324	-0.238	4.5419	-26.0108		14.515	-0.192	2.2922	1.3012	0.0946	5.5186
14.578	-2.7446	-0.0813	1.3116	-2.0198	-0.0383	-0.0083	0.7772	3.5161	-13.6383		14.578	0.1336	-4.3588	1.3831	0.0795	-4.85	-0.0034	-2.4587	2.4263	-14.1827		14.562	-0.4785	-0.1856	6.4783	-0.0449	0.0827	2.2777	0.7772	0.9518	-0.9356		14.578	-4.1511	0.1665	1.4247	-2.9446	0.1708	-0.0397	-1.5069	4.1572	-25.285		14.578	-0.192	2.3705	1.2882	0.069	5.8569
14.64	-2.8227	-0.0943	1.3051	-2.0671	-0.0716	-0.001	0.7138	3.3238	-14.0919		14.64	0.1466	-4.3849	1.3961	0.0935	-4.9342	0.0135	-1.9511	2.9392	-14.5456		14.625	-0.4915	-0.1726	6.4328	-0.0309	0.0862	2.2221	1.2848	0.8236	-0.7541		14.641	-4.073	0.1795	1.4312	-2.7521	0.152	-0.03	-1.1262	4.029	-25.285		14.64	-0.1789	2.4618	1.2947	0.0588	6.063
14.703	-2.8878	-0.0943	1.2921	-2.1495	-0.0769	-0.0034	1.2214	3.7084	-14.4549		14.703	0.1466	-4.4892	1.3636	0.083	-5.106	0.0014	-2.2683	2.7468	-15.2715		14.687	-0.4524	-0.1856	6.3873	-0.0432	0.0774	2.1472	0.9676	1.08	-1.5707		14.703	-4.0209	0.1795	1.4312	-2.6499	0.1245	-0.0494	-1.1897	4.3495	-24.4684		14.703	-0.1789	2.5009	1.2882	0.0741	6.3704
14.765	-2.966	-0.0813	1.2921	-2.2686	-0.1015	-0.0034	1.4752	3.8367	-14.5456		14.765	0.1336	-4.5675	1.3766	0.0918	-5.1674	0.0111	-2.2049	2.8109	-14.7271		14.75	-0.4655	-0.1986	6.3613	-0.0291	0.0774	2.0771	0.6503	0.8236	-1.2078		14.766	-3.9427	0.1926	1.4312	-2.4983	0.1399	-0.0275	-0.6186	4.6701	-25.0128		14.765	-0.1659	2.5791	1.2817	0.0792	6.7534
14.828	-3.0181	-0.0813	1.2791	-2.3685	-0.0716	0.0062	1.4117	3.7726	-13.2753		14.828	0.1206	-4.6718	1.3506	0.09	-5.2744	-0.0083	-2.7125	2.6827	-14.6363		14.812	-0.4785	-0.1986	6.3223	-0.0397	0.0985	2.024	0.7772	0.9518	-1.48		14.828	-3.8906	0.1926	1.4182	-2.3364	0.1382	-0.0421	-0.8724	4.6701	-25.1035		14.828	-0.192	2.6704	1.2882	0.0809	7.102
14.89	-3.0962	-0.0943	1.2856	-2.4964	-0.105	-0.0131	0.8407	3.7084	-14.7271		14.89	0.1466	-4.737	1.3571	0.0777	-5.455	-0.0179	-2.5856	2.5545	-15.5437		14.875	-0.4785	-0.1856	6.2703	-0.0397	0.0914	1.9926	1.1579	0.8236	-1.6614		14.891	-3.8255	0.1926	1.4182	-2.195	0.1399	-0.0372	-0.8724	4.5419	-25.285		14.89	-0.1789	2.7226	1.2882	0.1065	7.3441
14.953	-3.1743	-0.0813	1.2856	-2.6191	-0.0839	-0.0034	0.9041	3.6443	-14.6363		14.953	0.1466	-4.8283	1.3571	0.0988	-5.6198	-0.0058	-3.4739	2.8109	-14.9085		14.937	-0.4524	-0.1986	6.2443	-0.0537	0.0809	1.8935	0.3965	0.8236	-1.2985		14.953	-3.7604	0.2056	1.4182	-2.0826	0.1159	-0.0227	-1.6338	3.6443	-24.6498		14.953	-0.1789	2.7748	1.2817	0.1099	7.8216
15.015	-3.2525	-0.0943	1.2856	-2.6769	-0.0822	-0.0058	0.9676	3.3238	-14.4549		15.015	0.1206	-4.8674	1.3506	0.0865	-5.7794	-0.0179	-3.5373	3.2597	-14.9993		15	-0.4785	-0.2117	6.1923	-0.0414	0.0862	1.8838	0.7772	0.6954	-1.5707		15.016	-3.7083	0.2056	1.4182	-1.9259	0.1056	-0.03	-0.5552	3.3238	-24.922		15.015	-0.192	2.866	1.2817	0.0963	7.9177
15.078	-3.3306	-0.0943	1.2596	-2.7628	-0.1155	0.0087	1.2848	3.0033	-14.8178		15.078	0.1206	-4.9587	1.3506	0.0935	-5.9232	-0.001	-3.7277	2.2981	-15.7251		15.062	-0.4655	-0.1856	6.1468	-0.0502	0.0914	1.8307	0.3331	0.7595	-1.3892		15.078	-3.6432	0.2187	1.4117	-1.7998	0.1365	-0.0372	-0.8724	3.5161	-24.1962		15.078	-0.1789	2.8791	1.2817	0.0912	7.8198
15.14	-3.4088	-0.0813	1.2596	-2.8924	-0.0979	0.0014	1.9193	3.6443	-15.1807		15.14	0.1076	-5.05	1.3441	0.0883	-5.981	-0.0083	-2.8394	3.452	-14.9993		15.125	-0.4655	-0.1986	6.1208	-0.0414	0.0827	1.7413	1.1579	1.4647	-1.6614		15.141	-3.565	0.2317	1.4117	-1.6635	0.1502	-0.0324	-0.8724	4.1572	-24.8313		15.14	-0.1659	2.8791	1.2817	0.0929	7.0556
15.203	-3.4869	-0.0682	1.2531	-2.9678	-0.0997	0.0014	1.2848	2.7468	-15.09		15.203	0.1206	-5.1282	1.3441	0.1128	-6.1143	-0.0034	-2.649	3.1315	-14.7271		15.187	-0.4524	-0.1856	6.0818	-0.0502	0.0949	1.6929	0.5234	0.5672	-1.7522		15.203	-3.4869	0.2448	1.4052	-1.5801	0.1004	-0.047	-1.2531	4.6701	-23.8332		15.203	-0.1529	2.8139	1.2947	0.1133	6.5027
15.265	-3.552	-0.0813	1.2531	-3.0537	-0.0979	0.0159	1.729	3.5802	-14.0012		15.265	0.1076	-5.2065	1.3441	0.1005	-6.2458	-0.0058	-2.9028	2.1699	-15.6344		15.25	-0.4394	-0.2117	6.0493	-0.0554	0.0897	1.6784	0.3965	1.2082	-2.7502		15.266	-3.3957	0.2448	1.4052	-1.4591	0.1262	-0.0445	-1.2531	4.2854	-23.4703		15.265	-0.1529	2.7617	1.2947	0.0895	5.8432
15.328	-3.6692	-0.1204	1.2596	-3.2201	-0.1067	-0.0131	1.5386	4.2854	-14.0012		15.328	0.1336	-5.2978	1.3441	0.1163	-6.5597	-0.0083	-3.6008	3.0674	-16.2695		15.312	-0.4524	-0.2247	6.0038	-0.0467	0.102	1.6446	0.5869	1.0159	-2.5688		15.328	-3.3436	0.2578	1.3987	-1.3484	0.1245	-0.0324	-0.8724	4.9265	-24.0147		15.328	-0.1268	2.6965	1.3012	0.0826	5.1597
15.39	-3.7083	-0.0943	1.2531	-3.3218	-0.1278	-0.001	1.4117	4.029	-14.5456		15.39	0.1336	-5.376	1.3246	0.0935	-6.6	-0.001	-3.0297	2.4904	-15.6344		15.375	-0.4264	-0.2117	5.9518	-0.0414	0.0862	1.5624	0.8407	0.6313	-2.6595		15.391	-3.2655	0.2578	1.4052	-1.2342	0.0919	-0.0445	-1.4435	4.2213	-24.5591		15.39	-0.1529	2.6183	1.2947	0.0826	4.6514
15.453	-3.7474	-0.0813	1.2466	-3.4584	-0.1313	-0.0083	1.4752	3.5802	-15.09		15.453	0.1597	-5.4673	1.3506	0.1198	-6.7035	0.0135	-2.7125	3.0674	-16.2695		15.437	-0.4394	-0.1986	5.9194	-0.0502	0.1055	1.5141	0.7138	1.1441	-2.5688		15.453	-3.2134	0.2578	1.3987	-1.1405	0.1279	-0.0494	-1.5069	3.7726	-24.0147		15.453	-0.1529	2.54	1.3272	0.0401	4.2615
15.515	-3.8125	-0.0813	1.2531	-3.5636	-0.0962	-0.001	1.2214	3.8367	-14.1827		15.515	0.1206	-5.5586	1.3246	0.1075	-6.828	0.0038	-2.2683	3.0033	-15.9066		15.5	-0.3873	-0.1986	5.8869	-0.0327	0.0914	1.4779	1.1579	0.3107	-2.5688		15.516	-3.1353	0.2839	1.3922	-1.0315	0.097	-0.0494	-1.6973	4.0931	-23.6518		15.515	-0.1399	2.5009	1.3272	0.0656	3.7412
15.578	-3.9167	-0.0682	1.2336	-3.6635	-0.0979	0.0038	1.729	3.8367	-14.2734		15.578	0.1206	-5.5977	1.3246	0.1303	-6.9946	0.0038	-2.5221	2.234	-14.9993		15.562	-0.4134	-0.1595	5.8544	-0.0467	0.0985	1.3981	0.3331	0.3748	-2.478		15.578	-3.0571	0.2708	1.3922	-0.9446	0.1262	-0.0397	-0.9993	3.7726	-24.1962		15.578	-0.1529	2.4226	1.3207	0.0162	3.3926
15.64	-3.9818	-0.0552	1.2466	-3.7563	-0.1137	0.0014	1.5386	3.6443	-14.7271		15.64	0.1206	-5.689	1.3246	0.118	-7.2208	-0.0083	-3.1566	3.1315	-16.451		15.625	-0.4264	-0.1856	5.8024	-0.0414	0.0932	1.3933	0.3331	0.7595	-3.1132		15.641	-2.979	0.2708	1.3792	-0.8168	0.1245	-0.0591	-1.5704	3.1956	-23.2888		15.64	-0.1399	2.3574	1.3272	0.0247	3.1161
15.703	-4.0469	-0.0552	1.2336	-3.879	-0.0927	0.0087	1.9193	4.2854	-14.3641		15.703	0.1206	-5.7673	1.3181	0.1058	-7.3663	-0.001	-3.7911	3.1315	-15.6344		15.687	-0.4003	-0.2247	5.7569	-0.0344	0.0932	1.3425	0.3331	0.6313	-3.2946		15.703	-2.9269	0.2839	1.3857	-0.73	0.109	-0.0324	-1.5069	3.0033	-23.2888		15.703	-0.1399	2.2792	1.3337	0.0332	2.8808
15.765	-4.1251	-0.0813	1.2271	-4.0017	-0.1348	-0.0034	1.5386	4.9265	-14.6363		15.765	0.1206	-5.8194	1.3181	0.1128	-7.4926	0.0062	-2.7759	3.2597	-15.4529		15.75	-0.4003	-0.2117	5.7049	-0.0484	0.1002	1.2797	0.8407	1.1441	-3.0224		15.766	-2.8618	0.2708	1.3792	-0.638	0.0781	-0.0567	-1.2531	3.5161	-23.2888		15.765	-0.1268	2.214	1.3207	0.023	2.5408
15.828	-4.2032	-0.0552	1.2336	-4.1524	-0.1032	0.0014	1.8559	4.8624	-15.4529		15.828	0.1336	-5.9107	1.3181	0.111	-7.5575	0.0014	-2.7125	2.9392	-16.1788		15.812	-0.4003	-0.2378	5.6659	-0.0572	0.0879	1.2314	0.1427	0.8236	-2.9317		15.828	-2.7836	0.2708	1.3727	-0.5392	0.1296	-0.0421	-1.5069	2.6186	-23.3796		15.828	-0.1399	2.1227	1.3272	-0.0434	2.2643
15.89	-4.2553	-0.0682	1.2336	-4.275	-0.1383	0.0038	1.4117	4.9265	-14.4549		15.89	0.1727	-6.002	1.2986	0.111	-7.7398	0.0062	-2.7125	3.0674	-15.9973		15.875	-0.4264	-0.2117	5.6334	-0.0572	0.0949	1.1879	0.3331	0.7595	-3.0224		15.891	-2.7055	0.2839	1.3662	-0.5068	0.0936	-0.0324	-1.3166	2.8109	-23.4703		15.89	-0.1399	2.0705	1.3272	0.0043	2.0788
15.953	-4.3465	-0.0422	1.2336	-4.424	-0.1365	0.0183	1.6021	4.8624	-14.1827		15.953	0.1466	-6.0151	1.3051	0.1373	-7.5241	-0.001	-2.0145	2.6186	-16.0881		15.937	-0.4134	-0.2117	5.5879	-0.0414	0.0967	1.1516	0.7772	0.5672	-2.9317		15.953	-2.6274	0.2969	1.3662	-0.4812	0.1296	-0.0348	-0.9993	4.4136	-23.1074		15.953	-0.1659	1.9923	1.3337	-0.0093	1.8212
16.015	-4.4376	-0.0552	1.2336	-4.4643	-0.0927	0.0135	1.1579	3.6443	-15.1807		16.015	0.1206	-6.0542	1.3181	0.1461	-6.8245	-0.001	1.5386	2.875	-14.0012		16	-0.4003	-0.2117	5.5294	-0.0519	0.1037	1.1082	-0.1111	0.9518	-3.2946		16.016	-2.5362	0.2708	1.3662	-0.3892	0.0987	-0.0445	-1.3166	3.9649	-22.8352		16.015	-0.1268	1.9271	1.3272	-0.0588	1.6821
16.078	-4.5158	-0.0291	1.2206	-4.6675	-0.1172	-0.0179	0.7772	4.5419	-14.6363		16.078	0.1076	-5.989	1.3051	0.1128	-6.3317	-0.001	0.3965	3.0033	-11.0977		16.062	-0.3873	-0.2117	5.4969	-0.0537	0.1125	1.0767	0.9041	0.4389	-4.1112		16.078	-2.4581	0.2708	1.3662	-0.3381	0.1262	-0.03	-1.1262	3.9008	-24.3776		16.078	-0.1529	1.8227	1.3402	-0.0196	1.4949
16.14	-4.5809	-0.0291	1.2271	-4.82	-0.1225	0.0087	1.1579	4.5419	-14.8178		16.14	0.1336	-5.9368	1.3246	0.1233	-6.1739	-0.0034	-1.4435	2.2981	-9.5552		16.125	-0.3873	-0.2247	5.4709	-0.0554	0.1037	1.0212	0.3331	1.0159	-3.3854		16.141	-2.3929	0.2708	1.3662	-0.2666	0.1262	-0.0543	-1.8242	2.9392	-22.9259		16.14	-0.1399	1.7575	1.3337	-0.0076	1.3902
16.203	-4.633	-0.0161	1.2271	-4.9374	-0.1102	0.0062	0.46	4.8624	-14.8178		16.203	0.0946	-5.8586	1.3116	0.083	-5.7759	-0.0131	-2.1414	3.5161	-6.6518		16.187	-0.4003	-0.2117	5.4254	-0.0432	0.102	1.0018	0.9676	0.8877	-3.5668		16.203	-2.3408	0.2839	1.3532	-0.2121	0.1331	-0.047	-1.7607	2.875	-23.0166		16.203	-0.1399	1.6663	1.3337	-0.0059	1.2304
16.265	-4.6981	-0.0422	1.2271	-5.1389	-0.0979	0.0135	1.7924	5.1829	-14.8178		16.265	0.0815	-5.7673	1.3051	0.0988	-5.49	-0.0131	0.9676	2.4263	-6.1074		16.25	-0.3873	-0.1986	5.3799	-0.0344	0.1002	0.9607	0.2062	0.503	-3.2946		16.266	-2.2497	0.2708	1.3532	-0.1525	0.1039	-0.0372	-1.5069	3.3879	-23.4703		16.265	-0.1399	1.601	1.3402	-0.0076	1.1154
16.328	-4.7893	-0.0291	1.2141	-5.2476	-0.105	-0.001	1.4752	4.8624	-15.4529		16.328	0.0815	-5.689	1.3181	0.0637	-4.9956	0.0038	1.1579	2.875	-5.6537		16.312	-0.3613	-0.2508	5.3345	-0.0572	0.102	0.9124	0.2696	0.8236	-3.7483		16.328	-2.1715	0.2708	1.3467	-0.103	0.164	-0.03	-1.38	3.0033	-23.0166		16.328	-0.1399	1.5358	1.3467	-0.0145	0.954
16.39	-4.8804	-0.0291	1.2141	-5.3913	-0.1295	-0.0107	1.0945	4.7342	-15.1807		16.39	0.0555	-5.6369	1.3181	0.0532	-4.6378	-0.0107	2.3	2.234	-3.4761		16.375	-0.3743	-0.2378	5.3085	-0.0484	0.1037	0.8858	0.5234	1.08	-3.5668		16.391	-2.0804	0.2839	1.3467	-0.1337	0.1571	-0.0397	-1.5704	3.452	-23.3796		16.39	-0.1399	1.4446	1.3467	-0.0179	0.8406
16.453	-4.9455	-0.0161	1.2206	-5.4614	-0.112	-0.0034	1.031	4.1572	-15.09		16.453	0.0294	-5.5325	1.3246	0.0234	-4.4397	-0.001	0.9041	1.8493	-3.2039		16.437	-0.3743	-0.2508	5.2565	-0.0379	0.1072	0.881	1.2214	0.7595	-3.6576		16.453	-2.0153	0.2839	1.3467	-0.0928	0.1331	-0.047	-1.5704	3.3238	-22.3815		16.453	-0.1399	1.3793	1.3532	-0.0025	0.5985
16.515	-5.0497	-0.003	1.2206	-5.6278	-0.1032	0.0062	1.6021	4.0931	-14.8178		16.515	0.0294	-5.4804	1.3181	0.0339	-4.3695	-0.0083	-0.5552	2.5545	-1.9336		16.5	-0.3743	-0.2508	5.2305	-0.0291	0.0949	0.8254	1.1579	0.9518	-4.5649		16.516	-1.898	0.2839	1.3402	-0.04	0.1863	-0.0543	-2.1414	3.7726	-23.1981		16.515	-0.1399	1.3011	1.3597	-0.0145	0.4765
16.578	-5.1148	-0.0161	1.2206	-5.7435	-0.1207	-0.0058	0.8407	4.9906	-15.5437		16.578	0.0425	-5.4021	1.3181	0.0322	-4.1153	-0.0203	0.5869	2.0416	-1.6614		16.562	-0.3743	-0.2508	5.185	-0.0537	0.0985	0.8133	0.1427	0.6954	-3.9298		16.578	-1.8329	0.2839	1.3402	-0.0196	0.1623	-0.047	-1.6338	2.875	-22.8352		16.578	-0.1529	1.2229	1.3727	-0.057	0.4817
16.64	-5.1669	0.01	1.2271	-5.9485	-0.1681	0.0062	1.8559	4.8624	-15.6344		16.64	0.0034	-5.3239	1.3181	0.0409	-3.833	-0.0155	1.031	2.3622	-0.7541		16.625	-0.3613	-0.2639	5.12	-0.0379	0.0827	0.7626	0.5869	0.7595	-4.1112		16.641	-1.7548	0.2708	1.3467	0.0281	0.2207	-0.0251	-1.2531	2.875	-23.3796		16.64	-0.1399	1.1446	1.3857	-0.0383	0.4662
16.703	-5.2451	0.0231	1.2206	-6.108	-0.1102	0.0135	1.4752	4.7342	-15.1807		16.703	0.0294	-5.2587	1.3246	0.055	-3.4928	-0.0083	3.1249	1.5288	-1.0263		16.687	-0.3743	-0.2508	5.1005	-0.0502	0.0879	0.7239	0.2062	0.8877	-3.839		16.703	-1.6636	0.2839	1.3467	0.1184	0.1777	-0.0324	-1.1262	2.7468	-23.3796		16.703	-0.1789	1.0533	1.3922	-0.0128	0.3855
16.765	-5.3362	-0.003	1.2206	-6.2043	-0.1155	-0.0034	1.6655	4.1572	-15.2715		16.765	0.0164	-5.1674	1.3246	0.0374	-3.3525	-0.0179	3.1249	2.4263	-0.2097		16.75	-0.3743	-0.2769	5.055	-0.0291	0.0949	0.6949	0.6503	1.08	-2.7502		16.766	-1.5985	0.2578	1.3207	0.1099	0.1657	-0.047	-1.0628	2.8109	-22.1093		16.765	-0.1529	0.9751	1.3922	-0.04	0.3168
16.828	-5.4274	-0.003	1.2141	-6.3515	-0.1611	0.0062	1.3483	4.606	-15.7251		16.828	-0.0096	-5.0891	1.3051	0.0234	-3.335	-0.0155	0.6503	1.9775	-0.3004		16.812	-0.3482	-0.2508	5.016	-0.0502	0.1055	0.6974	0.5869	0.6313	-3.9298		16.828	-1.5204	0.2969	1.3142	0.0912	0.2533	-0.03	-1.2531	3.5161	-22.4722		16.828	-0.1399	0.8968	1.3987	-0.0059	0.2138
16.89	-5.4795	0.01	1.2206	-6.4286	-0.1365	-0.0058	1.5386	4.4136	-15.6344		16.89	-0.0096	-4.9848	1.3116	0.0409	-3.2122	-0.0131	0.2062	2.2981	-0.5726		16.875	-0.3482	-0.2639	4.977	-0.0467	0.0949	0.678	0.7138	0.8877	-3.9298		16.891	-1.4292	0.2708	1.3142	0.0792	0.1966	-0.047	-1.8876	2.875	-23.561		16.89	-0.1268	0.8186	1.4052	-0.023	0.152
16.953	-5.5707	0.01	1.2271	-6.5653	-0.14	0.0159	1.0945	4.3495	-15.2715		16.953	0.0294	-4.9326	1.3116	0.0252	-3.1088	-0.0203	1.0945	2.2981	-0.119		16.937	-0.3352	-0.2378	4.9445	-0.0274	0.1212	0.6345	1.2848	0.5672	-5.2		16.953	-1.325	0.31	1.3272	0.0741	0.1949	-0.0494	-1.2531	4.2854	-22.7444		16.953	-0.1268	0.7534	1.4052	-0.0468	0.0901
17.015	-5.6618	0.01	1.2206	-6.7563	-0.1313	0.0062	1.4752	4.7342	-15.09		17.015	-0.0096	-4.8544	1.3181	0.0339	-2.879	-0.0421	1.6021	2.1699	0.1533		17	-0.3613	-0.2378	4.8925	-0.0362	0.0844	0.5886	0.2696	0.4389	-4.202		17.016	-1.2729	0.2839	1.3207	0.1303	0.2619	-0.0567	-1.7607	2.875	-22.4722		17.015	-0.1399	0.6751	1.4247	-0.0196	0.042
17.078	-5.7269	0.0231	1.2206	-6.9123	-0.126	-0.0107	0.7772	5.3111	-14.8178		17.078	0.0034	-4.75	1.3311	0.0147	-2.6283	-0.03	2.8711	2.0416	0.3347		17.062	-0.3482	-0.2769	4.8535	-0.0327	0.0985	0.5862	1.031	0.8236	-4.8371		17.078	-1.1817	0.2708	1.3207	0.1644	0.2138	-0.0251	-1.1262	3.1315	-22.7444		17.078	-0.1529	0.5838	1.4247	-0.0298	0.1039
17.14	-5.753	0.0231	1.2271	-7.0051	-0.1488	0.0111	1.5386	5.5676	-15.1807		17.14	0.0425	-4.6848	1.3311	0.0234	-2.4372	-0.0203	3.1883	1.8493	-0.119		17.125	-0.3482	-0.2769	4.8275	-0.0432	0.1107	0.5499	0.0158	0.6954	-4.3834		17.141	-1.1036	0.2969	1.3077	0.2138	0.2602	-0.0397	-1.6973	2.4263	-21.9278		17.14	-0.1399	0.4925	1.4182	-0.0605	0.0695
17.203	-5.8442	0.0361	1.2206	-7.1541	-0.1365	0.0087	1.729	5.6317	-15.1807		17.203	0.0555	-4.6196	1.3311	0.0409	-2.367	-0.0131	2.6173	2.5545	-0.0282		17.187	-0.3613	-0.2899	4.782	-0.0502	0.109	0.5379	0.5869	1.1441	-4.2927		17.203	-1.0124	0.2839	1.3077	0.2445	0.2533	-0.0445	-1.6338	2.7468	-21.7464		17.203	-0.1659	0.4273	1.4312	-0.0332	0.0489
17.265	-5.9223	0.0361	1.2206	-7.254	-0.1769	-0.0083	0.8407	5.7599	-15.9066		17.265	0.0034	-4.5153	1.3246	0.0024	-2.367	-0.03	1.3483	2.2981	0.6069		17.25	-0.3613	-0.2899	4.7301	-0.0449	0.1037	0.5016	0.8407	0.503	-5.2		17.266	-0.9343	0.2839	1.3012	0.2189	0.2481	-0.0421	-0.6821	3.1956	-21.6556		17.265	-0.1399	0.336	1.4312	-0.0485	-0.0661
17.328	-6.0004	0.0622	1.2271	-7.3766	-0.1698	0.0135	1.729	5.3753	-15.5437		17.328	0.0034	-4.424	1.3441	0.0199	-2.2337	-0.0348	1.3483	2.0416	0.8791		17.312	-0.3482	-0.2769	4.7041	-0.0362	0.0985	0.4944	0.5234	0.6954	-4.4742		17.328	-0.8431	0.2839	1.2947	0.2121	0.2687	-0.0421	-1.8876	3.1315	-22.4722		17.328	-0.1268	0.2708	1.4376	-0.0502	-0.1778
17.39	-6.0786	0.0231	1.2271	-7.5501	-0.119	-0.001	1.9828	5.5035	-15.09		17.39	0.0034	-4.3719	1.3376	0.0112	-2.0987	-0.0276	1.9828	1.7852	-0.119		17.375	-0.3482	-0.2899	4.6586	-0.0397	0.0985	0.4533	0.2062	0.503	-4.5649		17.391	-0.778	0.2839	1.3012	0.2292	0.255	-0.047	-1.5069	3.3879	-22.6537		17.39	-0.1529	0.1926	1.4571	-0.0553	-0.2619
17.453	-6.1567	0.0491	1.2271	-7.7078	-0.14	-0.0058	0.9676	6.1446	-16.0881		17.453	-0.0096	-4.2675	1.3246	0.0269	-1.8901	-0.0542	2.4904	1.4006	0.5162		17.437	-0.3222	-0.2639	4.6261	-0.0519	0.1002	0.4388	0.2696	1.2082	-5.3815		17.453	-0.7129	0.2839	1.2947	0.2462	0.2481	-0.0494	-1.6973	2.6827	-21.6556		17.453	-0.1659	0.1143	1.4506	-0.0383	-0.2585
17.515	-6.2088	0.0231	1.2336	-7.473	-0.119	0.0111	1.031	3.7726	-14.8178		17.515	-0.0096	-4.1893	1.3441	0.0024	-1.7743	-0.0445	3.0614	1.9775	0.7884		17.5	-0.3352	-0.2769	4.5676	-0.0046	0.109	0.434	0.7772	0.6954	-5.1093		17.516	-0.6217	0.2969	1.2947	0.2854	0.243	-0.0421	-2.0145	3.2597	-22.1093		17.515	-0.1529	0.0491	1.4571	-0.0468	-0.2396
17.578	-6.2088	0.0491	1.2271	-7.1716	-0.14	-0.0203	0.9041	2.234	-13.4568		17.578	-0.0096	-4.1241	1.3506	0.0147	-1.6744	-0.0493	2.5538	1.4647	0.7884		17.562	-0.3352	-0.2769	4.5351	-0.0449	0.1142	0.4219	-0.0476	1.5288	-4.7464		17.578	-0.5306	0.2839	1.2947	0.2837	0.2447	-0.0251	-0.9993	2.875	-22.0186		17.578	-0.1529	-0.0291	1.4701	-0.0588	-0.2757
17.64	-6.1567	0.0491	1.2206	-6.6897	-0.1067	0.0038	0.8407	2.4263	-11.3699		17.64	0.0034	-4.0589	1.3636	0.0269	-1.6165	-0.0228	1.4117	1.3365	1.1513		17.625	-0.3222	-0.2899	4.4831	-0.0274	0.1107	0.4001	0.6503	0.3107	-4.8371		17.641	-0.4524	0.2839	1.2882	0.2854	0.2361	-0.0348	-1.4435	2.6827	-21.202		17.64	-0.1789	-0.1204	1.4766	-0.0281	-0.3753
17.703	-6.0786	0.0231	1.2271	-6.4023	-0.1032	0.0014	0.7138	4.0931	-9.283		17.703	-0.0096	-3.9806	1.3441	0.0199	-1.5639	-0.0179	1.6021	1.4006	0.8791		17.687	-0.3222	-0.2769	4.4441	-0.0362	0.102	0.3687	0.1427	0.8236	-5.1093		17.703	-0.3743	0.2839	1.2882	0.3297	0.2533	-0.0397	-1.6338	3.1315	-21.6556		17.703	-0.1659	-0.2117	1.4831	-0.0264	-0.4354
17.765	-6.0265	0.0491	1.2336	-6.2096	-0.0892	-0.0058	1.1579	5.1829	-6.3796		17.765	-0.0357	-3.8893	1.3636	0.0006	-1.4885	-0.0228	1.7924	1.8493	0.9699		17.75	-0.3222	-0.303	4.3921	-0.0186	0.116	0.3808	1.031	0.4389	-5.2908		17.766	-0.2962	0.2839	1.2882	0.3348	0.2	-0.0372	-0.8724	3.1315	-22.3815		17.765	-0.1399	-0.2639	1.4961	-0.04	-0.559
17.828	-5.9744	0.0361	1.2206	-5.8276	-0.0646	0.0038	0.7138	3.8367	-6.561		17.828	-0.0227	-3.798	1.3506	0.0112	-1.4184	-0.03	1.5386	1.8493	1.1513		17.812	-0.3222	-0.2899	4.3596	-0.0397	0.1195	0.3228	0.8407	1.4006	-5.1093		17.828	-0.218	0.2839	1.2882	0.3416	0.2481	-0.0348	-1.6338	2.6186	-21.6556		17.828	-0.1659	-0.3421	1.4961	-0.0417	-0.6123
17.89	-5.9223	0.0491	1.2141	-5.407	-0.1067	-0.0179	1.0945	1.0159	-6.924		17.89	0.0425	-3.7328	1.3636	-0.0011	-1.1957	-0.03	2.8711	1.7852	1.2421		17.875	-0.3092	-0.3291	4.3011	-0.0274	0.1142	0.3228	0.3331	0.2466	-5.2908		17.891	-0.1399	0.2839	1.2882	0.3791	0.2069	-0.047	-1.8876	3.0033	-21.3834		17.89	-0.1789	-0.4203	1.5026	-0.0673	-0.6655
17.953	-5.8572	0.0231	1.2076	-5.2633	-0.0822	-0.0034	1.4117	1.5929	-4.7464		17.953	-0.0227	-3.6546	1.3636	0.0041	-1.1378	-0.0324	2.6807	1.9775	1.2421		17.937	-0.3222	-0.316	4.2686	-0.0151	0.1055	0.3131	0.5869	0.6313	-4.7464		17.953	-0.0357	0.2708	1.2817	0.345	0.2035	-0.047	-0.7455	3.5161	-22.2		17.953	-0.1659	-0.4856	1.5091	-0.0656	-0.7737
18.015	-5.7921	0.0491	1.1947	-4.9935	-0.0611	0.0014	2.0462	1.7211	-4.9278		18.015	0.0034	-3.5894	1.3636	-0.0099	-1.0431	-0.03	2.2366	1.7852	1.5143		18	-0.3092	-0.303	4.2426	-0.0449	0.1142	0.3059	0.3331	0.3748	-5.7444		18.016	0.0425	0.2839	1.2947	0.3484	0.2172	-0.0348	-0.6821	3.3238	-21.6556		18.015	-0.1789	-0.5768	1.5091	-0.0485	-0.8664
18.078	-5.7009	0.0491	1.1882	-4.8656	-0.0839	-0.0058	1.0945	2.4263	-4.2927		18.078	-0.0227	-3.459	1.3766	-0.0029	-1.0115	-0.03	2.6173	2.1699	0.9699		18.062	-0.3222	-0.316	4.1841	-0.0291	0.1055	0.2769	0.3965	0.5672	-5.563		18.078	0.1206	0.2839	1.2882	0.3961	0.1897	-0.0518	-1.1897	4.0931	-22.2		18.078	-0.1659	-0.6812	1.5156	-0.0553	-0.9523
18.14	-5.6618	0.0622	1.1687	-4.6553	-0.0488	-0.0034	0.9676	3.1956	-2.3873		18.14	-0.0357	-3.4329	1.4026	0.0182	-0.9554	-0.0445	2.1097	1.9134	2.1494		18.125	-0.3092	-0.303	4.1322	-0.0327	0.109	0.2745	0.7772	0.6954	-5.7444		18.141	0.1987	0.2839	1.2882	0.391	0.1708	-0.0543	-1.0628	3.9649	-22.2908		18.14	-0.1789	-0.7333	1.5351	-0.0656	-1.0485
18.203	-5.5707	0.0491	1.1882	-4.3872	-0.0331	0.0183	1.729	2.1699	-2.5688		18.203	-0.0096	-3.3416	1.3896	-0.0204	-0.9449	-0.0276	1.7924	1.7211	1.9679		18.187	-0.3222	-0.316	4.1127	-0.0204	0.1072	0.2527	0.5234	0.1825	-5.9259		18.203	0.2769	0.2708	1.2882	0.4745	0.2103	-0.03	-1.5704	2.6827	-21.6556		18.203	-0.1789	-0.8246	1.5416	-0.057	-1.1086
18.265	-5.5055	0.0491	1.1687	-4.1226	-0.0629	-0.0107	1.4752	0.7595	-2.5688		18.265	-0.0096	-3.2894	1.3831	-0.0151	-0.8099	-0.0421	2.3635	2.2981	2.0587		18.25	-0.2962	-0.316	4.0737	-0.0379	0.1002	0.2261	0.6503	1.5929	-5.1093		18.266	0.355	0.2839	1.2882	0.5136	0.1468	-0.03	-0.9993	2.6186	-22.1093		18.265	-0.1659	-0.9029	1.5481	-0.086	-1.2271
18.328	-5.4274	0.0491	1.1622	-3.9368	-0.0348	0.0135	2.4904	1.5288	-1.6614		18.328	-0.0096	-3.146	1.4026	-0.0081	-0.7503	-0.0276	1.9193	1.8493	1.6957		18.312	-0.3092	-0.2899	4.0347	-0.0291	0.1195	0.2116	0.5234	0.1825	-5.6537		18.328	0.4332	0.2708	1.2817	0.5545	0.1812	-0.0372	-0.8724	3.1315	-21.8371		18.328	-0.1659	-0.9681	1.5481	-0.0979	-1.3765
18.39	-5.3493	0.0231	1.1492	-3.7528	-0.0471	-0.0083	1.3483	0.8877	-0.9356		18.39	-0.0096	-3.0677	1.4091	-0.0239	-0.6222	-0.0445	2.3	2.3622	2.0587		18.375	-0.2831	-0.2899	4.0022	-0.0344	0.1142	0.1875	0.9041	1.3365	-5.563		18.391	0.5243	0.2839	1.2817	0.5835	0.152	-0.0421	-1.4435	3.1956	-22.0186		18.39	-0.205	-1.0202	1.5481	-0.0724	-1.4125
18.453	-5.2972	0.0361	1.1557	-3.6565	-0.0383	-0.0107	2.4269	0.8236	-1.117		18.453	-0.0227	-3.0025	1.4026	-0.0169	-0.51	-0.0348	2.2366	2.1699	2.4216		18.437	-0.2701	-0.2899	3.9567	-0.0379	0.1072	0.202	0.3965	1.4647	-6.1981		18.453	0.5764	0.2708	1.2687	0.5903	0.152	-0.0421	-0.3014	2.6827	-21.3834		18.453	-0.192	-1.1376	1.5481	-0.0588	-1.5843
18.515	-5.2321	0.0361	1.1362	-3.4812	-0.0313	-0.001	1.9828	1.7852	-0.5726		18.515	-0.0227	-2.9243	1.4286	-0.0239	-0.4785	-0.03	2.9345	1.8493	2.1494		18.5	-0.2831	-0.3421	3.9177	-0.0327	0.1055	0.173	0.46	0.2466	-6.1981		18.516	0.6676	0.2708	1.2817	0.5682	0.1434	-0.0324	-0.6821	3.452	-21.9278		18.515	-0.192	-1.2028	1.5611	-0.0809	-1.6272
18.578	-5.1279	0.0491	1.1232	-3.3533	-0.0471	-0.0058	1.3483	1.5929	-1.0263		18.578	-0.0227	-2.8591	1.4026	-0.0099	-0.475	-0.0372	2.0462	1.2082	1.605		18.562	-0.2831	-0.3291	3.8852	-0.0309	0.1072	0.1633	0.3965	0.3107	-5.4722		18.578	0.7718	0.2839	1.2882	0.6039	0.1107	-0.0324	-0.3014	3.5802	-22.1093		18.578	-0.1789	-1.2941	1.5611	-0.0741	-1.7646
18.64	-5.1018	0.0491	1.1427	-3.1728	-0.0208	0.0038	1.5386	1.08	-0.3912		18.64	-0.0096	-2.7678	1.4221	-0.0099	-0.4714	-0.0179	1.8559	1.5288	2.1494		18.625	-0.2831	-0.3291	3.8397	-0.0309	0.1177	0.1754	0.7138	0.8877	-5.9259		18.641	0.8499	0.31	1.2947	0.7181	0.0472	-0.0445	-1.2531	2.234	-21.4742		18.64	-0.1789	-1.3724	1.5611	-0.1116	-1.8711
18.703	-4.9976	0.0491	1.1232	-3.0291	-0.0138	-0.001	1.7924	0.5672	-0.9356		18.703	-0.0227	-2.7026	1.4221	-0.0064	-0.4504	-0.0324	1.4117	1.3365	1.605		18.687	-0.2701	-0.3421	3.8072	-0.0274	0.1248	0.1537	0.5234	0.9518	-5.7444		18.703	0.902	0.2839	1.2882	0.7504	0.1004	-0.0348	-0.4917	2.4904	-21.7464		18.703	-0.1789	-1.4376	1.5481	-0.0622	-2.0582
18.765	-4.9065	0.0491	1.1167	-2.8416	-0.026	-0.0083	1.3483	0.2466	-0.119		18.765	-0.0227	-2.5982	1.4221	-0.0081	-0.3925	-0.0517	1.7924	1.3365	2.3309		18.75	-0.2962	-0.3291	3.7617	-0.0204	0.1318	0.144	1.0945	0.8877	-6.7425		18.766	0.9932	0.2708	1.2882	0.8407	0.0541	-0.0445	-0.5552	2.2981	-21.9278		18.765	-0.1789	-1.5158	1.5611	-0.1184	-2.1355
18.828	-4.8804	0.0491	1.1102	-2.7102	-0.0173	0.0014	1.1579	0.6954	0.244		18.828	-0.0487	-2.533	1.4351	-0.0029	-0.3101	-0.0469	2.0462	0.9518	2.4216		18.812	-0.2701	-0.3291	3.7227	-0.0081	0.1195	0.1126	0.6503	1.2082	-6.1981		18.828	1.0583	0.2708	1.2882	0.9157	-0.0078	-0.0591	-1.5069	2.4904	-21.2927		18.828	-0.192	-1.6201	1.5546	-0.0877	-2.2592
18.89	-4.8023	0.0491	1.0972	-2.6471	-0.0348	-0.0083	1.0945	1.657	-0.3004		18.89	-0.0096	-2.4157	1.4351	-0.0169	-0.2154	-0.059	2.2366	1.4006	2.6031		18.875	-0.2831	-0.316	3.6707	-0.0344	0.1142	0.1247	1.031	1.7211	-5.6537		18.891	1.1625	0.2839	1.2882	0.9191	0.006	-0.0518	-0.6821	2.6827	-21.0205		18.89	-0.1789	-1.6723	1.5481	-0.0809	-2.4481
18.953	-4.7111	0.0361	1.1102	-2.5122	-0.005	0.0038	1.0945	1.5288	0.5162		18.953	-0.0357	-2.3765	1.4416	-0.0309	-0.1804	-0.0711	1.8559	1.5288	1.8772		18.937	-0.2831	-0.316	3.6447	-0.0239	0.1212	0.1102	1.2848	1.08	-6.6518		18.953	1.2406	0.2839	1.2882	0.9975	-0.0009	-0.047	-1.1897	3.5802	-21.1112		18.953	-0.192	-1.7506	1.5351	-0.0928	-2.5597
19.015	-4.646	0.0361	1.0972	-2.358	0.009	0.0014	2.2366	0.6313	0.5162		19.015	-0.0487	-2.2852	1.4481	-0.0081	-0.1295	-0.059	2.3635	1.657	1.8772		19	-0.2701	-0.3682	3.5927	-0.0116	0.1195	0.0884	0.7138	1.0159	-6.6518		19.016	1.3188	0.2839	1.2947	1.0384	-0.0112	-0.0518	-0.6821	3.3238	-20.839		19.015	-0.192	-1.8288	1.5156	-0.103	-2.7211
19.078	-4.5548	0.0361	1.0907	-2.1915	-0.0138	-0.0155	0.8407	1.1441	0.3347		19.078	-0.0617	-2.1809	1.4416	-0.0484	-0.0927	-0.0566	2.6173	1.657	1.7865		19.062	-0.2962	-0.316	3.5538	-0.0274	0.1177	0.1053	1.2848	1.2082	-7.2869		19.078	1.3969	0.2708	1.2947	1.1303	0.0197	-0.064	-0.809	3.1956	-20.839		19.078	-0.205	-1.9201	1.5026	-0.0826	-2.9444
19.14	-4.5027	0.0231	1.0842	-2.1021	0.0406	0.0135	1.7924	0.8236	0.4255		19.14	-0.0748	-2.1288	1.4676	-0.0186	-0.0594	-0.0517	1.6655	1.2082	2.0587		19.125	-0.2701	-0.3551	3.5278	-0.0116	0.1195	0.0763	0.6503	0.9518	-6.2888		19.141	1.462	0.2839	1.3012	1.2053	-0.0181	-0.0348	-0.4917	2.234	-21.7464		19.14	-0.218	-1.9853	1.4766	-0.086	-3.0749
19.203	-4.4506	0.0231	1.0777	-1.983	0.023	-0.0131	1.0945	1.2723	0.0625		19.203	-0.0748	-2.0114	1.4676	-0.0099	-0.0576	-0.0421	2.0462	0.9518	2.1494		19.187	-0.3092	-0.3421	3.4693	-0.0186	0.1265	0.0787	1.3483	1.2723	-6.8332		19.203	1.5271	0.31	1.2947	1.2905	0.0129	-0.0397	-0.809	2.2981	-21.6556		19.203	-0.218	-2.0635	1.4441	-0.0877	-3.2209
19.265	-4.3595	0.0491	1.0842	-1.8919	0.0336	0.0111	1.7924	1.4647	-0.0282		19.265	-0.0487	-1.9331	1.4741	-0.0379	-0.005	-0.0542	1.7924	1.5929	2.3309		19.25	-0.2831	-0.3421	3.4303	-0.0379	0.1072	0.0715	1.031	1.08	-6.8332		19.266	1.6053	0.336	1.2947	1.3808	-0.0232	-0.0616	-1.3166	2.1699	-21.5649		19.265	-0.2441	-2.1548	1.4182	-0.0673	-3.4029
19.328	-4.2944	0.01	1.0647	-1.8095	0.0318	0.0087	2.0462	1.5929	-0.0282		19.328	-0.0878	-1.8679	1.4741	-0.0309	0.0862	-0.0493	3.3152	2.1057	3.0567		19.312	-0.2441	-0.3551	3.4108	-0.0291	0.1125	0.0497	0.5869	1.2723	-6.7425		19.328	1.6964	0.3491	1.2947	1.3808	-0.0129	-0.0494	-0.4917	3.1315	-21.5649		19.328	-0.2831	-2.22	1.4052	-0.1218	-3.7086
19.39	-4.2292	0.0361	1.0647	-1.6658	0.0388	0.0014	1.8559	1.0159	-0.2097		19.39	-0.0617	-1.8158	1.4871	0.0094	0.13	-0.0493	3.3152	2.1057	1.4235		19.375	-0.2441	-0.3551	3.3588	-0.0449	0.0932	0.0473	0.7772	1.3365	-6.561		19.391	1.7876	0.3621	1.3012	1.4881	0.006	-0.0567	-0.7455	3.0033	-21.202		19.39	-0.3092	-2.2983	1.3857	-0.1286	-3.8597
19.453	-4.112	0.0231	1.0582	-1.6062	0.0318	0.0014	1.8559	0.6313	0.1533		19.453	-0.0617	-1.6854	1.4936	-0.0519	0.1914	-0.0421	3.5056	1.2723	1.2421		19.437	-0.2831	-0.3551	3.3198	-0.0134	0.0967	0.0401	1.0945	1.1441	-6.561		19.453	1.8267	0.3752	1.3012	1.5579	-0.0129	-0.0445	-0.5552	2.9392	-21.8371		19.453	-0.3482	-2.3505	1.3792	-0.1473	-4.1774
19.515	-4.086	0.0231	1.0647	-1.4923	0.016	-0.001	1.2214	0.503	0.0625		19.515	-0.0617	-1.6201	1.5001	-0.0116	0.1476	-0.0517	2.8076	0.9518	0.3347		19.5	-0.2571	-0.3551	3.2743	-0.0116	0.102	0.0401	1.2214	0.8877	-7.1054		19.516	1.9048	0.4013	1.3012	1.6721	-0.0043	-0.0324	-0.3014	2.2981	-21.9278		19.515	-0.3873	-2.4287	1.3727	-0.1525	-4.3268
19.578	-3.9688	0.01	1.0582	-1.4065	0.0599	-0.0179	0.9041	1.2082	0.5162		19.578	-0.0617	-1.5549	1.5066	-0.0204	0.1248	-0.0517	1.729	1.657	1.2421		19.562	-0.2701	-0.3551	3.2483	-0.0274	0.1002	0.0062	0.5869	0.6313	-6.7425		19.578	1.983	0.4404	1.2947	1.8271	0.0146	-0.0543	-1.1897	2.8109	-20.5668		19.578	-0.4134	-2.533	1.3467	-0.1559	-4.5364
19.64	-3.9427	0.01	1.0582	-1.3224	0.0388	-0.0058	1.4752	0.6313	1.1513		19.64	-0.0878	-1.4767	1.5261	-0.0362	0.1125	-0.0276	2.1097	1.2723	-0.4819		19.625	-0.2441	-0.3551	3.2028	-0.0607	0.0914	0.0256	0.2062	0.6313	-6.8332		19.641	2.0611	0.4534	1.2947	1.9225	-0.0404	-0.0372	-0.5552	2.4263	-21.2927		19.64	-0.4134	-2.5982	1.3467	-0.1422	-4.8043
19.703	-3.7995	-0.003	1.0517	-1.2575	0.0862	-0.0058	1.6655	1.4647	0.6977		19.703	-0.1008	-1.3724	1.5456	-0.0099	0.1318	-0.0493	2.6173	1.657	0.7884		19.687	-0.231	-0.3551	3.1573	-0.0221	0.0879	0.0038	1.031	0.9518	-7.5591		19.703	2.1392	0.4665	1.2947	2.0009	0.0214	-0.0421	-0.238	2.234	-20.4761		19.703	-0.4264	-2.6504	1.3337	-0.132	-5.0241
19.765	-3.7604	-0.003	1.0582	-1.1979	0.0757	0.0014	1.4117	0.6954	0.7884		19.765	-0.0617	-1.3072	1.5521	-0.0186	0.2002	-0.0348	2.3	0.4389	0.3347		19.75	-0.2441	-0.3682	3.0858	-0.0432	0.0844	0.0038	0.9041	1.3365	-7.0147		19.766	2.2044	0.4665	1.2882	2.1218	-0.0112	-0.0372	-0.6186	2.6186	-22.0186		19.765	-0.4264	-2.7156	1.3142	-0.1354	-5.2782
19.828	-3.6823	-0.003	1.0647	-1.1173	0.0897	-0.0034	1.2848	0.9518	0.7884		19.828	-0.0748	-1.2028	1.5586	0.0059	0.2668	-0.0445	2.998	1.4006	-0.0282		19.812	-0.192	-0.3682	3.0728	-0.0467	0.0774	0.0111	1.2848	1.3365	-7.1962		19.828	2.3216	0.4795	1.3012	2.2564	-0.0919	-0.0445	-0.7455	3.0033	-21.3834		19.828	-0.4655	-2.7939	1.3142	-0.1371	-5.5204
19.89	-3.6041	-0.0161	1.0582	-1.0017	0.0616	-0.0324	1.1579	0.1825	1.1513		19.89	-0.0878	-1.1246	1.5716	-0.0379	0.3071	-0.0421	2.998	1.1441	1.0606		19.875	-0.205	-0.3291	3.0208	-0.0327	0.0844	0.0087	0.7138	1.0159	-7.922		19.891	2.3606	0.4795	1.2947	2.3501	0.0129	-0.0372	-0.1111	2.1057	-21.5649		19.89	-0.4785	-2.8721	1.3142	-0.1559	-5.7248
19.953	-3.552	-0.0161	1.0517	-0.9141	0.0686	-0.0107	0.7772	0.3107	0.6977		19.953	-0.0748	-1.0463	1.5586	-0.0344	0.3457	-0.0542	3.1883	0.6954	0.8791		19.937	-0.218	-0.3421	2.9689	-0.0397	0.0949	-0.0034	0.7138	1.2723	-6.924		19.953	2.4388	0.4925	1.2817	2.4983	-0.0816	-0.0543	-0.4283	2.2981	-22.2908		19.953	-0.4915	-2.9504	1.3012	-0.1405	-5.9772
20.015	-3.4869	-0.003	1.0452	-0.8475	0.0897	-0.0058	0.8407	0.3748	1.8772		20.015	-0.1008	-0.955	1.5651	-0.0221	0.3685	-0.0517	2.6173	1.7852	1.2421		20	-0.218	-0.3682	2.9364	-0.0169	0.0827	-0.0228	1.3483	1.4006	-7.3776		20.016	2.5169	0.4925	1.2752	2.7249	-0.0593	-0.0859	-0.4917	1.5929	-21.202		20.015	-0.5176	-3.0286	1.3012	-0.1627	-6.1575
20.078	-3.3827	-0.003	1.0452	-0.7984	0.0897	0.0135	1.1579	0.6954	0.9699		20.078	-0.0487	-0.8768	1.5781	-0.0256	0.3545	-0.0638	2.3635	1.1441	2.4216		20.062	-0.2441	-0.3682	2.9039	-0.0256	0.0879	-0.0107	0.8407	0.8877	-7.7406		20.078	2.582	0.4925	1.2752	2.8033	-0.0318	-0.0445	0.2062	2.2981	-21.7464		20.078	-0.5566	-3.1068	1.2947	-0.1967	-6.4632
20.14	-3.3176	-0.0291	1.0322	-0.7756	0.0774	-0.0252	0.5869	1.0159	1.0606		20.14	-0.0617	-0.7985	1.5781	-0.0151	0.365	-0.0542	3.3787	1.4006	1.4235		20.125	-0.231	-0.3682	2.8714	-0.0344	0.0932	-0.0131	0.9676	1.4006	-7.1962		20.141	2.6602	0.5056	1.2687	2.9259	-0.0868	-0.0372	-0.4917	2.7468	-21.4742		20.14	-0.5566	-3.1981	1.3012	-0.2019	-6.7431
20.203	-3.2134	-0.003	1.0452	-0.7143	0.1177	-0.0107	1.5386	1.3365	1.3328		20.203	-0.0748	-0.7203	1.5911	-0.0151	0.393	-0.0445	2.4904	1.4006	2.2401		20.187	-0.231	-0.3812	2.8129	-0.0169	0.0827	-0.0421	1.2848	1.08	-7.4684		20.203	2.7383	0.4925	1.2687	3.0826	-0.049	-0.064	-0.7455	2.234	-21.2927		20.203	-0.5696	-3.2503	1.3012	-0.2206	-7.054
20.265	-3.1353	-0.0291	1.0517	-0.6319	0.109	-0.0131	0.1427	0.8236	0.9699		20.265	-0.0357	-0.6421	1.5846	-0.0362	0.393	-0.0614	2.2366	1.4006	2.7845		20.25	-0.205	-0.3682	2.7869	-0.0239	0.0792	-0.0276	1.1579	0.8236	-7.7406		20.266	2.8165	0.5186	1.2687	3.3246	-0.0455	-0.0591	-0.1111	2.1057	-22.0186		20.265	-0.5827	-3.3286	1.3012	-0.1763	-7.4112
20.328	-3.0702	-0.003	1.0452	-0.5496	0.0827	-0.0083	0.8407	0.1184	1.3328		20.328	-0.0617	-0.5508	1.5846	-0.0291	0.4632	-0.0445	2.0462	1.7211	2.3309		20.312	-0.231	-0.3682	2.7349	-0.0291	0.0774	-0.0662	0.2062	1.0159	-7.0147		20.328	2.8816	0.5056	1.2622	3.4796	-0.0782	-0.0397	-0.6186	2.234	-22.2		20.328	-0.5827	-3.4068	1.3012	-0.1507	-7.5571
20.39	-3.005	-0.0422	1.0387	-0.4515	0.1248	0.0159	1.3483	-0.0098	1.8772		20.39	-0.0878	-0.4725	1.6041	0.0041	0.4965	-0.0445	3.1883	1.4647	3.6011		20.375	-0.205	-0.3682	2.7089	-0.0309	0.0757	-0.0517	1.0945	1.0159	-7.7406		20.391	2.9467	0.5186	1.2492	3.6823	-0.0627	-0.064	-1.3166	1.2723	-21.6556		20.39	-0.5957	-3.485	1.3012	-0.1576	-7.8251
20.453	-2.9269	-0.0422	1.0452	-0.4129	0.1072	-0.0203	0.8407	-0.138	1.5143		20.453	-0.0487	-0.3682	1.6106	-0.0011	0.5649	-0.0614	2.1097	1.4006	2.8753		20.437	-0.192	-0.3682	2.6699	-0.0274	0.0827	-0.0542	1.2214	0.7595	-6.924		20.453	3.0118	0.5317	1.2557	3.8271	-0.0782	-0.0421	-0.5552	1.5288	-22.2		20.453	-0.6087	-3.5242	1.3012	-0.2274	-7.5657
20.515	-2.8488	-0.0161	1.0712	-0.4077	0.1055	-0.0107	1.031	0.6954	1.5143		20.515	-0.1008	-0.3291	1.6106	-0.0204	0.6473	-0.0566	2.6173	1.4006	3.1475		20.5	-0.218	-0.3291	2.6309	-0.0081	0.0669	-0.059	0.7772	1.3365	-7.4684		20.516	3.0769	0.5447	1.2492	3.9941	-0.1469	-0.047	-0.1111	1.9775	-22.1093		20.515	-0.6478	-3.5111	1.3012	-0.2479	-7.1295
20.578	-2.7836	-0.0682	1.0712	-0.3656	0.1055	-0.0372	-0.1111	0.0543	1.4235		20.578	-0.1008	-0.2247	1.6366	-0.0221	0.6701	-0.0348	3.0614	1.5929	3.3289		20.562	-0.218	-0.3812	2.5854	-0.0397	0.0879	-0.0662	1.4117	1.2082	-7.1054		20.578	3.1811	0.5708	1.2362	4.1627	-0.0249	-0.0397	-0.7455	1.9775	-21.6556		20.578	-0.6348	-3.4981	1.2947	-0.2853	-6.5388
20.64	-2.7185	-0.0682	1.0842	-0.3551	0.109	-0.0083	0.7772	0.9518	1.0606		20.64	-0.0487	-0.1465	1.6431	-0.0256	0.7052	-0.059	3.0614	1.3365	3.2382		20.625	-0.218	-0.3943	2.5464	-0.0221	0.0739	-0.0832	0.9676	0.8877	-7.7406		20.641	3.2593	0.5447	1.2362	4.4881	-0.0198	-0.0348	-0.9993	1.2082	-22.1093		20.64	-0.6478	-3.4459	1.2947	-0.1814	-6.1764
20.703	-2.6274	-0.0682	1.0907	-0.3393	0.1072	-0.0203	1.2848	0.3107	1.7865		20.703	-0.0748	-0.0682	1.6561	-0.0239	0.735	-0.0493	2.9345	1.8493	3.0567		20.687	-0.205	-0.3682	2.5269	-0.0291	0.0774	-0.0735	0.9676	1.2723	-7.0147		20.703	3.3244	0.5708	1.2297	4.6312	-0.1469	-0.0227	-0.3014	1.7852	-22.9259		20.703	-0.6348	-3.3677	1.2882	-0.2547	-5.6973
20.765	-2.5492	-0.0682	1.1102	-0.2289	0.1125	-0.0155	-0.3648	0.0543	1.5143		20.765	-0.0617	-0.0161	1.6561	-0.0134	0.749	-0.0421	3.1883	1.8493	4.1455		20.75	-0.1659	-0.3812	2.4554	-0.0327	0.0914	-0.0662	1.0945	1.1441	-7.4684		20.766	3.3895	0.5577	1.2297	4.8424	-0.0541	-0.047	-0.238	1.4647	-22.7444		20.765	-0.6348	-3.3155	1.2817	-0.2087	-5.3487
20.828	-2.4841	-0.0682	1.0972	-0.1641	0.1212	-0.0107	0.46	0.3748	1.2421		20.828	-0.0878	0.0752	1.6691	-0.0116	0.7788	-0.0711	2.4904	1.2723	3.5104		20.812	-0.1789	-0.4073	2.4164	-0.0432	0.0985	-0.0662	1.5386	1.5929	-6.924		20.828	3.4546	0.5577	1.2232	5.0673	-0.1022	-0.0543	-1.1262	1.5929	-22.0186		20.828	-0.6608	-3.2373	1.2817	-0.2479	-4.7493
20.89	-2.3539	-0.0813	1.1037	-0.1641	0.1002	-0.0348	-0.0476	-0.0098	2.5123		20.89	-0.1008	0.1665	1.6626	-0.0134	0.8086	-0.0493	2.8076	1.7211	2.5123		20.875	-0.192	-0.4073	2.3775	-0.0256	0.0844	-0.0662	1.2848	1.3365	-7.8313		20.891	3.5328	0.5708	1.2232	5.2309	-0.14	-0.0518	-1.0628	1.9134	-21.9278		20.89	-0.6348	-3.146	1.2752	-0.2206	-4.3028
20.953	-2.3148	-0.0943	1.1232	-0.1431	0.1002	-0.0058	0.2062	0.3748	1.8772		20.953	-0.0878	0.2448	1.6691	-0.0169	0.8437	-0.0542	2.998	1.4006	3.2382		20.937	-0.192	-0.4073	2.332	-0.0221	0.0844	-0.0783	0.8407	0.6313	-7.5591		20.953	3.6239	0.5577	1.2102	5.4285	-0.1194	-0.0518	-1.3166	1.4006	-22.6537		20.953	-0.6217	-3.0938	1.2817	-0.1916	-4.0229
21.015	-2.2106	-0.0943	1.1362	-0.1378	0.102	-0.0228	0.3331	0.7595	1.605		21.015	-0.1008	0.336	1.6691	-0.0449	0.8998	-0.0614	2.1731	1.4647	3.3289		21	-0.1659	-0.3812	2.293	-0.0169	0.0651	-0.0759	1.031	0.6954	-7.3776		21.016	3.676	0.5838	1.2167	5.6499	-0.1366	-0.0518	-0.3014	1.657	-23.1074		21.015	-0.5957	-3.0156	1.2687	-0.2206	-3.8563
21.078	-2.1194	-0.0682	1.1427	-0.1308	0.116	-0.0179	1.3483	0.6313	2.1494		21.078	-0.0748	0.4013	1.6626	-0.0256	0.9156	-0.0493	2.9345	2.1057	4.1455		21.062	-0.192	-0.4073	2.254	-0.0344	0.0721	-0.0807	0.6503	0.9518	-7.4684		21.078	3.7542	0.5969	1.2167	5.9225	-0.1366	-0.064	-0.7455	0.6954	-22.3815		21.078	-0.5827	-2.9373	1.2687	-0.1661	-3.4613
21.14	-2.0543	-0.0682	1.1557	-0.1185	0.0897	-0.0179	-0.5552	0.2466	2.1494		21.14	-0.0748	0.4925	1.6626	-0.0291	0.9437	-0.059	2.5538	1.8493	4.5085		21.125	-0.1789	-0.3682	2.202	-0.0344	0.0757	-0.1001	0.9676	1.1441	-7.1054		21.141	3.8193	0.5838	1.2102	6.1048	-0.1657	-0.047	-0.5552	1.5288	-23.7425		21.14	-0.5566	-2.8721	1.2817	-0.1593	-3.1247
21.203	-1.9762	-0.0813	1.1557	-0.0887	0.123	-0.0179	0.46	0.503	2.7845		21.203	-0.0617	0.5577	1.6756	-0.0327	0.9787	-0.0421	2.6807	1.5929	4.2363		21.187	-0.1399	-0.3812	2.163	-0.0204	0.0757	-0.1001	1.1579	1.5929	-6.8332		21.203	3.8974	0.5969	1.2037	6.3382	-0.1984	-0.0421	-0.5552	1.5288	-22.9259		21.203	-0.5436	-2.7547	1.2752	-0.2019	-2.941
21.265	-1.9371	-0.0682	1.1622	-0.1185	0.0967	-0.0034	1.6655	0.1825	2.5123		21.265	-0.0617	0.636	1.6756	-0.0221	1.0489	-0.0614	2.9345	1.4647	4.4177		21.25	-0.1789	-0.3812	2.1175	-0.0116	0.0809	-0.088	1.1579	1.2082	-7.5591		21.266	3.9625	0.5969	1.2037	6.5801	-0.1125	-0.047	-0.4917	1.3365	-22.2		21.265	-0.5045	-2.7156	1.2752	-0.1695	-2.8087
21.328	-1.885	-0.0943	1.1622	-0.1098	0.116	-0.03	0.1427	0.6954	2.6031		21.328	-0.0748	0.7273	1.6951	-0.0344	1.0857	-0.059	2.7442	1.1441	3.6011		21.312	-0.192	-0.3943	2.085	-0.0221	0.0704	-0.1122	0.8407	1.4006	-7.3776		21.328	4.0276	0.5969	1.2037	6.776	-0.2104	-0.0664	-1.38	1.5929	-23.4703		21.328	-0.4915	-2.6243	1.2947	-0.1831	-2.716
21.39	-1.8329	-0.1074	1.1752	-0.0747	0.102	-0.0276	0.7138	0.3748	2.3309		21.39	-0.0878	0.8055	1.6886	-0.0344	1.0997	-0.0687	2.8076	1.08	4.4177		21.375	-0.192	-0.4203	2.0395	-0.0011	0.0704	-0.117	0.9676	1.2723	-7.6498		21.391	4.1058	0.5969	1.1972	7.0707	-0.2259	-0.0445	-0.3648	0.9518	-23.1074		21.39	-0.5045	-2.5591	1.3142	-0.1848	-2.4189
21.453	-1.7808	-0.0813	1.1817	-0.0344	0.0897	-0.0034	1.1579	0.1825	2.0587		21.453	-0.0748	0.8447	1.6821	-0.0011	1.1155	-0.059	3.569	0.8236	3.6011		21.437	-0.192	-0.3943	2.02	-0.0327	0.0774	-0.1218	0.6503	1.08	-7.2869		21.453	4.1839	0.6099	1.1842	7.3195	-0.1297	-0.0688	-0.6186	0.9518	-22.4722		21.453	-0.4915	-2.4939	1.3337	-0.1593	-2.0737
21.515	-1.7418	-0.0943	1.2012	-0.0256	0.123	-0.0107	0.9676	0.7595	2.4216		21.515	-0.0487	0.962	1.7016	-0.0256	1.1611	-0.0662	1.8559	1.5288	4.6899		21.5	-0.218	-0.3943	1.9615	-0.0204	0.0827	-0.1049	1.5386	0.9518	-7.3776		21.516	4.2621	0.5969	1.2037	7.5477	-0.2087	-0.0664	-0.8724	1.08	-23.0166		21.515	-0.4915	-2.4026	1.3532	-0.132	-2.0084
21.578	-1.7287	-0.0813	1.1947	-0.0484	0.0862	-0.0083	0.7772	0.4389	1.3328		21.578	-0.0748	1.0403	1.6951	-0.0239	1.1593	-0.0614	1.8559	0.7595	3.7826		21.562	-0.205	-0.3551	1.9225	-0.0151	0.102	-0.1097	1.8559	1.0159	-7.1054		21.578	4.3272	0.636	1.2037	7.7488	-0.2052	-0.0518	-0.7455	0.6954	-22.6537		21.578	-0.4785	-2.3374	1.3662	-0.1576	-1.938
21.64	-1.7157	-0.0943	1.1947	-0.0537	0.0879	-0.0228	0.3965	0.3107	1.3328		21.64	-0.0617	1.1055	1.6821	-0.0449	1.1558	-0.059	2.0462	1.4647	3.8733		21.625	-0.192	-0.4073	1.864	-0.0344	0.0967	-0.1073	0.9676	1.2723	-7.7406		21.641	4.3793	0.623	1.1972	7.6602	-0.1846	-0.0616	-1.2531	2.234	-23.3796		21.64	-0.4785	-2.2722	1.3792	-0.1235	-1.8522
21.703	-1.7287	-0.0682	1.2012	-0.0852	0.109	-0.0083	0.3965	0.3107	1.9679		21.703	-0.0617	1.1576	1.6821	-0.0344	1.226	-0.059	2.3	0.9518	3.9641		21.687	-0.192	-0.3943	1.8445	-0.0344	0.0827	-0.1097	0.8407	1.4006	-7.4684		21.703	4.4053	0.623	1.1907	7.4387	-0.1194	-0.0421	-0.6821	3.0674	-23.7425		21.703	-0.4785	-2.1679	1.4182	-0.1422	-1.6066
21.765	-1.7287	-0.0943	1.2012	-0.0922	0.1265	0.0062	0.8407	0.6313	1.4235		21.765	-0.0748	1.3011	1.6821	-0.0397	1.2523	-0.0324	1.4117	1.2082	3.9641		21.75	-0.1789	-0.3943	1.8055	-0.0239	0.0827	-0.1267	0.8407	1.4006	-7.4684		21.766	4.3923	0.623	1.1842	6.8799	-0.0541	-0.0688	-0.3014	4.0931	-23.1074		21.765	-0.4785	-2.1027	1.4182	-0.1559	-1.4005
21.828	-1.7287	-0.0943	1.1947	-0.0344	0.1072	-0.001	1.2848	0.4389	0.9699		21.828	-0.0487	1.3663	1.7016	-0.0449	1.3557	-0.0445	3.3152	1.4647	3.8733		21.812	-0.1659	-0.3943	1.7601	-0.0397	0.0914	-0.1242	1.0945	1.657	-7.1962		21.828	4.3272	0.636	1.1647	6.4472	0.097	-0.0421	-0.6186	3.9008	-22.7444		21.828	-0.4785	-2.0114	1.4312	-0.1354	-1.215
21.89	-1.7157	-0.0813	1.2012	-0.0274	0.0862	-0.0058	0.7772	-0.0739	1.3328		21.89	-0.0748	1.4315	1.6821	-0.0221	1.382	-0.0493	3.3152	0.9518	4.327		21.875	-0.1789	-0.4073	1.7211	-0.0291	0.1055	-0.1267	1.0945	1.4006	-7.7406		21.891	4.2751	0.623	1.1517	6.3706	0.0403	-0.0616	-1.6338	2.1057	-22.9259		21.89	-0.4785	-1.9331	1.4247	-0.1099	-1.1618
21.953	-1.6897	-0.0943	1.2076	-0.0379	0.1107	0.0038	1.4117	0.3107	1.0606		21.953	-0.0878	1.5228	1.6886	-0.0221	1.3996	-0.0638	2.5538	1.3365	4.5992		21.937	-0.1789	-0.3812	1.6951	-0.0344	0.0792	-0.1363	0.6503	1.5929	-7.1962		21.953	4.1839	0.636	1.1647	5.8425	0.1777	-0.0543	-1.2531	2.234	-23.1981		21.953	-0.4915	-1.8549	1.4506	-0.132	-1.1429
22.015	-1.6376	-0.0813	1.2076	0.1251	0.1265	-0.001	0.7772	-0.715	2.1494		22.015	-0.0617	1.588	1.6886	-0.0327	1.4522	-0.0638	2.5538	1.2082	4.0548		22	-0.192	-0.4073	1.6431	-0.0169	0.1177	-0.1339	1.4117	1.08	-8.6479		22.016	4.1318	0.623	1.1647	5.4677	0.1331	-0.03	-0.8724	4.5419	-23.6518		22.015	-0.4785	-1.7766	1.4636	-0.1252	-1.057
22.078	-1.5725	-0.0813	1.2012	0.1338	0.1318	-0.0107	1.1579	-1.0997	2.0587		22.078	-0.0878	1.6663	1.6756	-0.0362	1.4837	-0.0469	2.998	0.7595	4.1455		22.062	-0.1659	-0.3943	1.6106	-0.0309	0.0897	-0.1363	1.0945	1.7852	-7.5591		22.078	4.0537	0.636	1.1582	5.2922	0.1451	-0.0518	-1.3166	3.1956	-23.924		22.078	-0.4785	-1.6854	1.4701	-0.0928	-0.9111
22.14	-1.4683	-0.1074	1.2012	0.1321	0.1265	-0.0131	1.6021	-0.9073	1.4235		22.14	-0.1268	1.7315	1.6821	-0.0362	1.5048	-0.0421	2.5538	0.6954	4.0548		22.125	-0.1659	-0.3682	1.5716	-0.0309	0.0721	-0.1629	1.0945	1.1441	-7.4684		22.141	3.9886	0.623	1.1582	4.9293	0.1983	-0.0348	-1.5069	3.7726	-22.563		22.14	-0.4785	-1.6332	1.4701	-0.1013	-0.7136
22.203	-1.4031	-0.0943	1.2076	0.0164	0.144	-0.0034	0.9676	0.503	2.2401		22.203	-0.0617	1.8227	1.6951	-0.0327	1.5819	-0.0614	2.8711	1.1441	4.2363		22.187	-0.192	-0.3943	1.5196	-0.0169	0.0827	-0.1581	1.2848	1.08	-7.7406		22.203	3.9104	0.623	1.1582	4.5273	0.2189	-0.0348	-1.3166	4.8624	-23.0166		22.203	-0.4915	-1.5419	1.4766	-0.1048	-0.6002
22.265	-1.2729	-0.0943	1.2466	0.0427	0.1248	-0.0058	1.0945	0.7595	2.8753		22.265	-0.0878	1.914	1.6756	-0.0467	1.6696	-0.059	3.2518	1.1441	3.9641		22.25	-0.1399	-0.4073	1.4936	-0.0344	0.0792	-0.1605	0.9676	0.8877	-7.922		22.266	3.8714	0.636	1.1517	4.2581	0.1915	-0.0445	-2.1414	4.5419	-22.3815		22.265	-0.4785	-1.4506	1.4831	-0.1013	-0.5521
22.328	-1.1948	-0.0813	1.2531	0.0234	0.1265	-0.0228	0.46	1.0159	3.0567		22.328	-0.0878	2.0053	1.6886	-0.0362	1.7082	-0.0493	3.3152	0.9518	4.4177		22.312	-0.1659	-0.4203	1.4546	-0.0221	0.0739	-0.1726	0.46	1.2723	-7.5591		22.328	3.8062	0.636	1.1582	4.236	0.2207	-0.0591	-1.5704	3.452	-23.7425		22.328	-0.4785	-1.3724	1.4831	-0.0809	-0.5247
22.39	-1.1297	-0.0813	1.2661	0.0725	0.1265	-0.001	0.9676	0.7595	2.4216		22.39	-0.1008	2.0836	1.6886	-0.0677	1.7959	-0.0662	2.998	1.1441	4.5085		22.375	-0.1659	-0.3943	1.4091	-0.0327	0.0739	-0.1774	0.9676	1.5288	-6.8332		22.391	3.7281	0.636	1.1517	3.8646	0.2172	-0.047	-1.6973	4.8624	-23.1074		22.39	-0.4915	-1.3072	1.4961	-0.1065	-0.4611
22.453	-1.0906	-0.0943	1.2726	0.1776	0.123	-0.0034	0.3331	0.1184	2.6031		22.453	-0.0617	2.1749	1.6886	-0.0414	1.8292	-0.059	3.2518	1.2723	4.1455		22.437	-0.1659	-0.4073	1.3766	-0.0239	0.0862	-0.1677	1.729	1.5288	-7.4684		22.453	3.663	0.623	1.1517	3.6005	0.2327	-0.0494	-1.5704	4.606	-22.8352		22.453	-0.4785	-1.2159	1.5026	-0.0707	-0.3289
22.515	-0.9864	-0.1074	1.2661	0.2617	0.123	-0.0034	0.5234	-0.8432	2.6031		22.515	-0.1008	2.2531	1.6951	-0.0554	1.8783	-0.0542	2.6173	0.503	4.6899		22.5	-0.1659	-0.4073	1.3246	-0.0309	0.0686	-0.1943	1.729	1.5288	-7.5591		22.516	3.5979	0.623	1.1582	3.4915	0.2464	-0.0445	-1.38	4.1572	-22.9259		22.515	-0.4785	-1.1507	1.4896	-0.069	-0.2447
22.578	-0.9213	-0.1334	1.2661	0.288	0.1318	0.0087	1.1579	-0.715	3.4197		22.578	-0.0878	2.3183	1.7016	-0.0397	1.9853	-0.0517	3.3787	1.0159	4.6899		22.562	-0.1529	-0.4203	1.2791	-0.0309	0.0897	-0.1967	1.2214	1.1441	-7.5591		22.578	3.5197	0.636	1.1647	3.2564	0.188	-0.0421	-1.9511	4.4777	-22.7444		22.578	-0.4785	-1.0594	1.4896	-0.0911	-0.1228
22.64	-0.8431	-0.1074	1.2531	0.1724	0.1212	-0.0155	0.3965	-0.4586	3.4197		22.64	-0.0617	2.3705	1.6886	-0.0502	2.0203	-0.0614	2.998	1.2723	4.5085		22.625	-0.1659	-0.3812	1.2466	-0.0239	0.0792	-0.1992	0.7138	1.2723	-7.0147		22.641	3.4546	0.623	1.1712	3.1321	0.2481	-0.0543	-1.1897	4.9906	-23.1981		22.64	-0.4785	-0.9942	1.4896	-0.0519	-0.0764
22.703	-0.7129	-0.1074	1.2661	0.1811	0.116	-0.0252	0.46	0.6313	3.4197		22.703	-0.0748	2.4487	1.7016	-0.0624	2.1062	-0.0421	2.7442	1.0159	4.327		22.687	-0.1399	-0.3943	1.1817	-0.0309	0.0792	-0.2016	0.46	1.2723	-7.922		22.703	3.3504	0.636	1.1777	2.9072	0.1932	-0.0494	-0.9993	4.7983	-23.0166		22.703	-0.4915	-0.9029	1.4896	-0.0434	-0.0301
22.765	-0.6738	-0.0813	1.2921	0.1303	0.1072	-0.0179	0.1427	0.6954	2.8753		22.765	-0.0748	2.5791	1.6951	-0.0537	2.2798	-0.0614	3.4421	1.08	5.0529		22.75	-0.1399	-0.4334	1.1622	-0.0204	0.0827	-0.2137	0.9041	0.5672	-7.1962		22.766	3.2983	0.623	1.1777	2.6772	0.2395	-0.0348	-1.7607	4.6701	-22.8352		22.765	-0.4785	-0.8507	1.4961	-0.0622	0.0129
22.828	-0.5696	-0.0813	1.2921	0.2074	0.1458	-0.0107	0.9041	0.5672	2.966		22.828	-0.0748	2.6183	1.7146	-0.0659	2.3728	-0.0638	3.1883	0.5672	4.5992		22.812	-0.1399	-0.4203	1.1167	-0.0011	0.0914	-0.1967	1.0945	1.2723	-7.8313		22.828	3.2202	0.636	1.2037	2.4864	0.2224	-0.047	-1.0628	6.2728	-22.8352		22.828	-0.4785	-0.7464	1.4961	-0.0588	0.006
22.89	-0.5306	-0.1204	1.3051	0.2004	0.1212	-0.001	0.2062	-0.5227	2.6031		22.89	-0.0748	2.7226	1.7016	-0.0362	2.4271	-0.0566	3.3787	0.6313	4.7807		22.875	-0.1138	-0.4073	1.0842	-0.0274	0.0721	-0.2088	0.9041	1.3365	-7.8313		22.891	3.142	0.623	1.2102	2.3688	0.2069	-0.0324	-1.7607	4.5419	-23.4703		22.89	-0.4915	-0.6812	1.4961	-0.0588	0.1159
22.953	-0.4524	-0.1074	1.2986	0.3581	0.1212	0.0038	1.031	-1.0997	1.605		22.953	-0.0878	2.8008	1.7146	-0.0344	2.5131	-0.0662	3.9497	0.8236	4.5992		22.937	-0.1659	-0.4073	1.0517	-0.0274	0.0862	-0.2233	1.4117	1.2082	-7.3776		22.953	3.0509	0.636	1.2167	2.1968	0.2018	-0.0445	-1.3166	5.247	-23.3796		22.953	-0.4785	-0.5899	1.4896	-0.0605	0.176
23.015	-0.3482	-0.0682	1.3051	0.3529	0.1195	-0.0155	0.8407	-1.0355	2.0587		23.015	-0.0617	2.8791	1.7146	-0.0484	2.5832	-0.0517	3.2518	0.8877	4.327		23	-0.1268	-0.4203	1.0062	-0.0344	0.0757	-0.2402	0.5234	0.8236	-8.0128		23.016	2.9988	0.6099	1.2297	2.0826	0.2207	-0.047	-0.9993	5.1829	-23.0166		23.015	-0.4915	-0.5116	1.4896	-0.023	0.3134
23.078	-0.2831	-0.1074	1.2856	0.3108	0.0949	-0.0058	0.7138	-0.2663	2.2401		23.078	-0.0617	2.9313	1.7211	-0.0624	2.6779	-0.0807	2.6173	0.8877	4.7807		23.062	-0.1399	-0.4203	0.9542	-0.0221	0.0914	-0.2209	1.4752	1.5288	-7.2869		23.078	2.9206	0.623	1.2427	1.8714	0.2138	-0.0372	-1.8876	5.4394	-23.4703		23.078	-0.4785	-0.4464	1.4896	-0.0434	0.3374
23.14	-0.1659	-0.1074	1.2921	0.2512	0.123	-0.0034	0.0793	0.503	3.4197		23.14	-0.0617	3.0486	1.7276	-0.0554	2.8252	-0.0566	4.2035	0.6954	4.7807		23.125	-0.1268	-0.3943	0.9282	-0.0397	0.0914	-0.2378	1.2848	1.2082	-6.6518		23.141	2.8295	0.623	1.2492	1.7027	0.2327	-0.0543	-1.4435	5.5035	-23.1074		23.14	-0.4915	-0.3682	1.4831	-0.0622	0.3872
23.203	-0.1138	-0.0813	1.2986	0.2249	0.1177	-0.0155	0.2062	1.1441	2.3309		23.203	-0.0748	3.1138	1.7471	-0.0484	2.9023	-0.0469	2.9345	1.08	4.6899		23.187	-0.1268	-0.4203	0.8697	-0.0239	0.0827	-0.2281	1.3483	1.2723	-7.3776		23.203	2.7644	0.636	1.2622	1.6193	0.2378	-0.0713	-1.8876	5.1829	-23.2888		23.203	-0.4655	-0.2769	1.4896	-0.0417	0.3391
23.265	-0.0096	-0.0943	1.3051	0.288	0.1177	-0.0155	0.2696	1.08	3.2382		23.265	-0.0357	3.179	1.7471	-0.0765	3.0251	-0.0638	3.6959	1.3365	4.6899		23.25	-0.1268	-0.4073	0.8307	-0.0186	0.0774	-0.2571	1.1579	1.08	-7.1962		23.266	2.6862	0.636	1.2687	1.5477	0.2275	-0.0494	-1.1897	4.7342	-23.3796		23.265	-0.4785	-0.1856	1.4896	-0.0588	0.4113
23.328	0.0685	-0.1074	1.3051	0.3283	0.1195	0.0111	0.7138	-0.3945	3.4197		23.328	-0.0487	3.2312	1.7081	-0.0642	3.118	-0.0517	3.7594	0.8877	5.3251		23.312	-0.1268	-0.4334	0.7852	-0.0099	0.0897	-0.2402	1.6655	1.4647	-7.2869		23.328	2.6081	0.623	1.2687	1.42	0.2602	-0.0421	-1.2531	4.6701	-23.0166		23.328	-0.4785	-0.1204	1.4766	-0.0451	0.4868
23.39	0.1206	-0.1074	1.3051	0.4177	0.0932	0.0062	0.2696	-0.4586	2.7845		23.39	0.0034	3.3486	1.7341	-0.0589	3.2706	-0.0542	3.569	0.9518	5.3251		23.375	-0.1008	-0.4073	0.7462	-0.0029	0.1002	-0.2644	0.7772	1.08	-6.561		23.391	2.543	0.636	1.2882	1.3518	0.2361	-0.0372	-1.0628	4.8624	-23.8332		23.39	-0.4915	-0.0813	1.4701	-0.0196	0.5572
23.453	0.2248	-0.1204	1.3051	0.4317	0.0897	-0.0083	0.9676	-0.138	3.2382		23.453	0.0294	3.4007	1.7471	-0.0309	3.3337	-0.0759	3.1883	1.08	4.8714		23.437	-0.1138	-0.4334	0.7202	-0.0081	0.0949	-0.2499	1.4752	1.1441	-7.6498		23.453	2.4778	0.623	1.2817	1.2036	0.255	-0.0591	-1.1262	5.3111	-23.924		23.453	-0.4655	0.0491	1.4636	-0.0468	0.5779
23.515	0.316	-0.1204	1.3116	0.4107	0.0757	-0.0107	0.7772	-0.3304	2.7845		23.515	0.0294	3.5051	1.7341	-0.0344	3.4635	-0.0469	4.0132	1.0159	5.0529		23.5	-0.1529	-0.4073	0.6682	-0.0116	0.0739	-0.2741	1.7924	1.1441	-6.4703		23.516	2.4127	0.623	1.3012	1.0418	0.2705	-0.0591	-1.4435	5.7599	-23.6518		23.515	-0.4915	0.1143	1.4636	-0.0281	0.5899
23.578	0.3941	-0.1204	1.3116	0.3844	0.0879	-0.001	0.2062	0.3748	3.6011		23.578	0.0164	3.5703	1.7341	-0.0397	3.5845	-0.059	3.3787	0.8877	4.5992		23.562	-0.1008	-0.4334	0.6357	-0.0221	0.109	-0.2692	1.2848	0.9518	-6.6518		23.578	2.3346	0.623	1.2947	0.9412	0.3168	-0.0397	-1.4435	5.5035	-23.4703		23.578	-0.4785	0.2056	1.4571	-0.0468	0.5813
23.64	0.4722	-0.1074	1.3051	0.3756	0.0757	-0.0034	1.1579	0.6954	3.6011		23.64	0.0815	3.6224	1.7406	-0.0221	3.7528	-0.0445	3.0614	0.6954	4.9621		23.625	-0.0878	-0.3943	0.5773	-0.0291	0.1195	-0.2813	1.5386	1.9775	-6.1074		23.641	2.2564	0.6099	1.3077	0.9055	0.3014	-0.0397	-1.6973	5.5035	-24.5591		23.64	-0.4655	0.2839	1.4571	-0.0417	0.6483
23.703	0.5634	-0.0943	1.3116	0.4265	0.0704	-0.0348	0.1427	0.0543	2.5123		23.703	0.0425	3.7268	1.7601	-0.0484	3.8528	-0.0638	3.2518	1.4647	5.5973		23.687	-0.1008	-0.4203	0.5383	-0.0169	0.0967	-0.3006	1.7924	1.4647	-6.561		23.703	2.1783	0.623	1.3142	0.8152	0.2687	-0.0543	-1.7607	4.7983	-24.1054		23.703	-0.4655	0.3621	1.4506	-0.0383	0.7067
23.765	0.6285	-0.1334	1.3116	0.5106	0.0739	-0.0155	0.5234	-0.715	3.5104		23.765	0.0164	3.805	1.7536	-0.0677	4.0439	-0.0638	3.7594	1.1441	5.2343		23.75	-0.0878	-0.4073	0.5253	-0.0274	0.1072	-0.3006	1.6021	1.657	-7.1054		23.766	2.1002	0.623	1.3077	0.7368	0.2756	-0.047	-1.1262	4.6701	-24.6498		23.765	-0.4785	0.4404	1.4441	-0.0247	0.7891
23.828	0.7327	-0.1204	1.3051	0.5298	0.0616	-0.0252	0.46	-0.3945	3.6011		23.828	0.0425	3.8963	1.7471	-0.0519	4.1544	-0.0662	3.3152	1.08	5.0529		23.812	-0.0748	-0.4334	0.4603	-0.0099	0.0862	-0.3151	0.5234	0.9518	-6.2888		23.828	2.0351	0.623	1.3207	0.638	0.3031	-0.03	-0.8724	6.0804	-24.3776		23.828	-0.4655	0.5056	1.4376	-0.023	0.8698
23.89	0.7848	-0.1074	1.2986	0.5596	0.0634	-0.001	0.8407	-0.2663	3.1475		23.89	0.0685	3.9485	1.7471	-0.0449	4.2701	-0.0687	3.4421	0.5672	4.5085		23.875	-0.0748	-0.4073	0.4278	-0.0134	0.0897	-0.3321	1.2848	1.9775	-6.8332		23.891	1.9569	0.623	1.3207	0.5085	0.3168	-0.0543	-1.1897	6.2728	-24.5591		23.89	-0.4785	0.6099	1.4247	-0.0349	0.8269
23.953	0.876	-0.1074	1.3181	0.5123	0.0616	0.0038	0.7138	0.6313	3.2382		23.953	0.0685	4.0267	1.7471	-0.0659	4.3928	-0.0711	3.7594	0.8877	5.2343		23.937	-0.0748	-0.4203	0.3758	-0.0397	0.116	-0.3272	1.5386	1.7211	-6.3796		23.953	1.8657	0.623	1.3402	0.454	0.2859	-0.0494	-1.5069	5.9522	-24.7406		23.953	-0.4655	0.7012	1.4182	-0.04	0.8938
24.015	0.9541	-0.1074	1.3051	0.5456	0.0494	-0.0155	0.7138	1.1441	3.0567		24.015	0.0425	4.118	1.7211	-0.0484	4.5156	-0.0687	3.0614	1.2082	4.8714		24	-0.0617	-0.3943	0.3498	-0.0344	0.1037	-0.3224	1.729	1.7852	-5.8352		24.016	1.7876	0.636	1.3337	0.3654	0.3374	-0.0543	-1.6973	5.6317	-25.3757		24.015	-0.4785	0.7664	1.4117	-0.0434	0.9522
24.078	1.0062	-0.1074	1.3116	0.5947	0.0318	-0.0203	0.2696	0.4389	2.6031		24.078	0.0425	4.1441	1.7601	-0.0677	4.612	-0.0711	2.6173	0.8877	5.5065		24.062	-0.0878	-0.4203	0.3043	-0.0344	0.0932	-0.3393	0.9041	1.3365	-6.4703		24.078	1.7225	0.636	1.3402	0.3399	0.2876	-0.0397	-2.0145	5.6958	-25.1942		24.078	-0.4655	0.8316	1.3987	-0.0264	1.0381
24.14	1.1234	-0.0943	1.3181	0.6315	0.0055	-0.0083	1.0945	-0.5227	3.1475		24.14	0.0555	4.2875	1.7406	-0.0484	4.7856	-0.0832	2.0462	0.8236	5.0529		24.125	-0.1008	-0.4073	0.2458	-0.0221	0.0844	-0.3562	1.2848	1.4647	-6.0166		24.141	1.6443	0.623	1.3337	0.3194	0.2979	-0.0713	-1.5069	6.2087	-25.285		24.14	-0.4655	0.9229	1.3857	-0.0111	1.1051
24.203	1.2146	-0.1074	1.3116	0.7138	0.0213	-0.0179	0.7138	-0.9073	3.6011		24.203	0.0425	4.3397	1.7471	-0.0642	4.9207	-0.0662	3.5056	0.6313	4.9621		24.187	-0.0878	-0.4203	0.2133	-0.0362	0.0739	-0.3659	1.5386	1.9775	-5.8352		24.203	1.5532	0.636	1.3337	0.2786	0.3117	-0.0591	-2.2049	5.5035	-25.5572		24.203	-0.4524	1.0142	1.3727	-0.0196	1.2442
24.265	1.2797	-0.1074	1.3181	0.7331	0.002	-0.0107	0.1427	-0.0739	3.6919		24.265	0.0555	4.4049	1.7406	-0.0817	5.11	-0.0469	4.267	0.8877	5.5973		24.25	-0.0878	-0.4334	0.1743	-0.0309	0.0967	-0.3586	1.4752	1.4006	-5.8352		24.266	1.475	0.623	1.3402	0.1985	0.279	-0.0616	-1.7607	6.0804	-24.8313		24.265	-0.4394	1.1055	1.3597	-0.0264	1.3369
24.328	1.3578	-0.1074	1.3051	0.7016	0.002	0.0062	1.0945	0.1184	3.6011		24.328	0.0555	4.4962	1.7471	-0.0449	5.2521	-0.0711	3.4421	0.8236	5.2343		24.312	-0.0487	-0.4725	0.1353	-0.0432	0.0844	-0.378	1.4752	0.6313	-6.2888		24.328	1.4099	0.623	1.3402	0.1286	0.267	-0.0616	-2.3318	6.0163	-24.922		24.328	-0.4264	1.1707	1.3532	-0.04	1.4297
24.39	1.449	-0.1074	1.3181	0.7033	0.0108	-0.0083	1.3483	0.6313	3.6011		24.39	0.0685	4.5875	1.7471	-0.0572	5.3871	-0.0735	4.7111	0.8236	5.9602		24.375	-0.0748	-0.4203	0.0833	-0.0116	0.0774	-0.3852	1.3483	1.5288	-6.2888		24.391	1.3318	0.649	1.3402	0.0895	0.3134	-0.0397	-1.8242	5.6317	-26.5552		24.39	-0.4394	1.2359	1.3402	-0.0502	1.6048
24.453	1.5271	-0.0943	1.3051	0.7243	0.0108	-0.0131	0.5234	0.3107	3.6011		24.453	0.0425	4.6397	1.7471	-0.0537	5.4502	-0.0759	2.998	0.503	5.3251		24.437	-0.0357	-0.4073	0.0313	-0.0344	0.0827	-0.3731	1.9828	1.657	-6.3796		24.453	1.2667	0.623	1.3402	0.0435	0.3185	-0.047	-1.3166	6.9138	-26.283		24.453	-0.4264	1.3272	1.3272	-0.057	1.7491
24.515	1.6053	-0.0943	1.3181	0.819	-0.0278	-0.0324	0.7138	0.2466	2.8753		24.515	0.0425	4.7309	1.7406	-0.0537	5.6606	-0.0614	3.6959	-0.0739	5.2343		24.5	-0.0878	-0.4073	0.0119	-0.0291	0.0914	-0.3949	1.9193	1.7211	-5.9259		24.516	1.1755	0.623	1.3467	-0.0111	0.3014	-0.0518	-2.2683	6.5933	-26.0108		24.515	-0.4003	1.4054	1.3077	-0.0417	1.8985
24.578	1.6704	-0.0943	1.3246	0.9259	-0.005	0.0038	1.0945	-0.6509	2.8753		24.578	0.0555	4.8353	1.7406	-0.0624	5.8623	-0.0783	3.3152	0.4389	4.7807		24.562	-0.0227	-0.4073	-0.0401	-0.0204	0.0721	-0.4094	1.5386	1.4647	-5.7444		24.578	1.0974	0.636	1.3467	-0.0059	0.31	-0.0251	-1.0628	6.401	-26.1923		24.578	-0.4003	1.4706	1.3077	-0.0247	2.1046
24.64	1.7355	-0.0943	1.3181	0.9767	-0.0103	-0.0203	0.7772	-0.4586	2.6031		24.64	0.0294	4.9005	1.7471	-0.0554	5.9921	-0.0662	4.267	0.7595	5.2343		24.625	-0.0617	-0.4073	-0.0791	-0.0099	0.0792	-0.4215	2.1731	1.9775	-6.1074		24.641	1.0192	0.636	1.3532	-0.0196	0.3203	-0.0445	-1.6973	5.8881	-26.4645		24.64	-0.4003	1.5098	1.3012	-0.0213	2.3519
24.703	1.8397	-0.0943	1.3181	1.0398	-0.0068	-0.0348	1.2214	-0.6509	3.6919		24.703	0.0815	4.9527	1.7406	-0.0852	6.1096	-0.059	3.4421	0.3107	5.5065		24.687	-0.0357	-0.4334	-0.1181	-0.0186	0.0774	-0.4408	1.031	1.2082	-5.9259		24.703	0.9281	0.623	1.3467	-0.0536	0.334	-0.0445	-1.1897	5.8881	-26.3738		24.703	-0.3743	1.601	1.2882	-0.0281	2.6095
24.765	1.9178	-0.0682	1.3116	1.0818	-0.0313	-0.0107	1.2848	-0.2021	3.0567		24.765	0.0555	5.057	1.7406	-0.0519	6.3323	-0.0517	4.0766	0.6954	4.9621		24.75	-0.0617	-0.4203	-0.1701	-0.0256	0.0704	-0.4287	1.4752	1.1441	-6.1074		24.766	0.8629	0.636	1.3467	-0.0639	0.3065	-0.047	-1.7607	6.0804	-27.0089		24.765	-0.3743	1.6793	1.2817	-0.0298	2.8207
24.828	1.996	-0.0943	1.3181	1.0661	-0.026	-0.03	1.2848	-0.2021	3.6011		24.828	0.0164	5.1091	1.7536	-0.0695	6.5216	-0.0807	4.2035	0.3107	5.2343		24.812	-0.0487	-0.4464	-0.1961	0.0006	0.0616	-0.4505	1.729	1.657	-5.8352		24.828	0.7718	0.636	1.3532	-0.1184	0.3271	-0.0372	-1.8242	6.2728	-26.9182		24.828	-0.3743	1.7184	1.2752	-0.0162	3.1539
24.89	2.0871	-0.0943	1.3051	1.1449	-0.0418	-0.0107	2.1097	0.6313	2.5123		24.89	0.0555	5.2135	1.7406	-0.08	6.6444	-0.0614	4.3304	0.3107	4.8714		24.875	-0.0487	-0.4203	-0.2546	0.0024	0.0529	-0.4529	2.4269	1.9775	-5.3815		24.891	0.6806	0.623	1.3597	-0.1865	0.3271	-0.047	-2.0145	6.3369	-27.1904		24.89	-0.3743	1.8097	1.2752	-0.0366	3.3634
24.953	2.1783	-0.0943	1.3051	1.194	-0.0488	-0.0203	1.729	-0.3945	3.6011		24.953	0.0685	5.3178	1.7601	-0.0747	6.818	-0.0807	3.6325	0.503	5.688		24.937	-0.0227	-0.4334	-0.3131	-0.0064	0.0581	-0.4674	1.7924	1.5929	-5.3815		24.953	0.6155	0.6099	1.3727	-0.1746	0.3254	-0.0445	-2.3318	6.401	-27.7348		24.953	-0.3613	1.8749	1.2687	-0.0059	3.7274
25.015	2.2044	-0.0813	1.3311	1.3289	-0.0716	-0.0155	1.6655	-0.9714	3.0567		25.015	0.0425	5.37	1.7536	-0.0782	6.9968	-0.0735	4.0766	0.6954	5.4158		25	-0.0227	-0.4073	-0.3261	-0.0379	0.0827	-0.4843	1.0945	1.7211	-6.0166		25.016	0.5374	0.623	1.3857	-0.1763	0.3203	-0.0567	-2.5221	6.4651	-27.8255		25.015	-0.3613	1.9532	1.2817	-0.0196	4.0915
25.078	2.3216	-0.0552	1.3181	1.3902	-0.0313	0.0062	2.7442	-0.7791	2.7845		25.078	0.0425	5.4482	1.7406	-0.0782	7.1336	-0.0638	4.3939	0.1825	4.5085		25.062	0.0034	-0.3943	-0.3716	-0.0099	0.0581	-0.4722	1.6021	1.7852	-5.8352		25.078	0.4462	0.623	1.3857	-0.2019	0.3117	-0.0445	-2.2049	6.401	-27.3718		25.078	-0.3482	2.0184	1.2687	-0.0179	4.3096
25.14	2.4258	-0.0552	1.3246	1.4393	-0.0524	-0.0179	1.6655	-0.715	4.0548		25.14	0.0685	5.5395	1.7536	-0.0905	7.3072	-0.0807	3.4421	0.3107	4.9621		25.125	-0.0227	-0.3943	-0.4171	-0.0291	0.0529	-0.494	0.9676	1.5288	-4.202		25.141	0.355	0.6099	1.3857	-0.1746	0.3117	-0.0445	-2.2683	6.8497	-28.0977		25.14	-0.3352	2.0836	1.2817	0.0179	4.6479
25.203	2.4648	-0.0291	1.3181	1.4656	-0.0611	-0.0324	1.729	-0.0098	3.3289		25.203	0.0685	5.6047	1.7601	-0.0677	7.4913	-0.0856	3.2518	0.503	5.4158		25.187	-0.0357	-0.4334	-0.4496	-0.0274	0.0651	-0.5109	1.6021	1.7852	-3.839		25.203	0.2899	0.5969	1.3922	-0.1814	0.3185	-0.0421	-2.078	6.5292	-28.6421		25.203	-0.3352	2.1357	1.2752	0.0179	4.9227
25.265	2.556	-0.0291	1.3051	1.4971	-0.0401	-0.0155	1.6021	0.7595	3.7826		25.265	0.0815	5.683	1.7471	-0.0835	7.5913	-0.0614	4.0766	1.08	4.8714		25.25	-0.0227	-0.4073	-0.5081	-0.0169	0.0827	-0.5423	1.1579	1.2082	-4.3834		25.266	0.1857	0.5969	1.3857	-0.1678	0.3288	-0.0421	-1.7607	5.6958	-28.8236		25.265	-0.2831	2.227	1.2687	0.0503	5.2095
25.328	2.6472	-0.0161	1.3116	1.576	-0.0453	-0.0058	2.3	0.3107	3.3289		25.328	0.0555	5.7482	1.7471	-0.0642	7.7053	-0.088	2.0462	0.1825	4.4177		25.312	-0.0096	-0.4203	-0.5471	-0.0362	0.0704	-0.5423	1.4752	1.0159	-4.6556		25.328	0.1206	0.5969	1.3922	-0.2002	0.31	-0.03	-1.2531	6.3369	-29.7309		25.328	-0.2571	2.3183	1.2622	0.0622	5.4139
25.39	2.7123	-0.0161	1.3181	1.6461	-0.0348	-0.0058	2.8076	0.1825	2.6938		25.39	0.0425	5.7873	1.7601	-0.0642	7.4983	-0.0807	2.5538	0.5672	4.9621		25.375	-0.0096	-0.4073	-0.5731	-0.0064	0.0616	-0.5495	1.9193	2.1057	-4.2927		25.391	0.0425	0.5708	1.4052	-0.2921	0.3065	-0.0494	-2.3952	6.7215	-28.9143		25.39	-0.2571	2.3835	1.2622	0.0264	5.7556
25.453	2.7904	-0.0161	1.3181	1.7495	-0.0471	-0.0034	1.9193	-0.2021	2.966		25.453	0.0685	5.7743	1.7666	-0.0432	6.8986	-0.0711	0.2696	0.3748	4.5992		25.437	0.0034	-0.4073	-0.612	-0.0011	0.0529	-0.5858	1.031	1.2082	-4.5649		25.453	-0.0487	0.5708	1.4182	-0.2819	0.3271	-0.047	-1.6973	6.5292	-29.5495		25.453	-0.2441	2.4226	1.2622	0.0605	6.0373
25.515	2.8686	-0.0291	1.3181	1.8423	-0.0629	-0.0203	2.2366	-0.9073	3.1475		25.515	0.0946	5.709	1.7601	-0.0589	6.3568	-0.0711	0.0793	1.0159	5.2343		25.5	-0.0096	-0.4073	-0.638	-0.0134	0.0651	-0.5785	1.9828	1.7852	-4.0205		25.516	-0.1138	0.5577	1.4117	-0.3041	0.3117	-0.047	-2.078	7.0421	-30.0031		25.515	-0.231	2.5139	1.2622	0.0878	6.4082
25.578	2.9337	-0.003	1.3246	1.9019	-0.0559	0.0038	2.6173	-0.2663	3.2382		25.578	0.0685	5.6438	1.7601	-0.0309	6.1779	-0.0735	2.5538	0.3107	6.1417		25.562	-0.0096	-0.4334	-0.6965	-0.0204	0.0686	-0.5955	1.729	1.9134	-4.3834		25.578	-0.192	0.5708	1.4247	-0.3279	0.3391	-0.0494	-1.1897	6.9138	-30.0939		25.578	-0.218	2.5791	1.2622	0.0775	6.683
25.64	3.0248	-0.003	1.3181	1.9667	-0.0646	-0.0083	1.2848	-0.4586	2.7845		25.64	0.0685	5.5786	1.7796	-0.1273	5.6852	-0.0832	0.6503	0.6954	5.2343		25.625	0.0034	-0.4203	-0.7225	-0.0116	0.0739	-0.5906	1.1579	1.3365	-4.2927		25.641	-0.2831	0.5577	1.4312	-0.3313	0.322	-0.0372	-1.6338	6.7215	-29.8217		25.64	-0.231	2.6574	1.2492	0.0741	7.0951
25.703	3.116	0.0361	1.3181	2.0544	-0.0787	-0.0058	2.7442	-0.138	3.0567		25.703	0.0555	5.5004	1.7666	-0.0677	5.3871	-0.0735	1.1579	1.3365	5.5973		25.687	0.0164	-0.4334	-0.7615	-0.0029	0.0651	-0.6341	1.6021	1.657	-4.6556		25.703	-0.3613	0.5577	1.4247	-0.3467	0.2928	-0.0324	-1.8876	6.7215	-30.4568		25.703	-0.231	2.7226	1.2622	0.0724	7.4506
25.765	3.1941	0.0361	1.3116	2.1157	-0.0804	-0.0083	2.3635	-0.3945	2.966		25.765	0.0815	5.4352	1.7731	-0.0256	4.9978	-0.0687	0.0793	0.3748	5.2343		25.75	0.0164	-0.4203	-0.8005	-0.0134	0.0581	-0.6389	1.4117	1.5929	-4.9278		25.766	-0.4655	0.5447	1.4182	-0.2973	0.322	-0.0567	-1.4435	5.8881	-30.3661		25.765	-0.231	2.7878	1.2557	0.0878	7.7992
25.828	3.2853	-0.003	1.3181	2.1981	-0.0611	0.0062	2.5538	-0.0739	2.966		25.828	0.0555	5.3569	1.7731	-0.0379	4.6489	-0.0687	0.6503	1.3365	4.6899		25.812	0.0034	-0.4203	-0.8395	-0.0134	0.0651	-0.6704	1.1579	1.3365	-4.5649		25.828	-0.5436	0.5317	1.4247	-0.3007	0.2911	-0.0372	-1.3166	6.2728	-30.6383		25.828	-0.205	2.853	1.2622	0.1082	7.6447
25.89	3.3504	0.0361	1.3311	2.34	-0.0874	-0.0228	2.6173	-0.3945	2.6031		25.89	0.0946	5.3048	1.7731	-0.0291	4.321	-0.0904	0.3965	0.4389	5.3251		25.875	0.0425	-0.4203	-0.9045	-0.0064	0.0686	-0.6752	1.0945	1.1441	-4.7464		25.891	-0.6087	0.5447	1.4247	-0.3279	0.2945	-0.0591	-2.0145	6.5933	-29.5495		25.89	-0.192	2.8791	1.2557	0.1031	7.6807
25.953	3.4155	0.0491	1.3116	2.4224	-0.0541	-0.0107	2.5538	0.4389	3.0567		25.953	0.0685	5.1874	1.7731	-0.0624	4.2	-0.0566	1.2214	0.8877	5.2343		25.937	0.0294	-0.4073	-0.9305	-0.0186	0.0739	-0.6897	1.729	2.0416	-4.3834		25.953	-0.6869	0.5317	1.4247	-0.3892	0.3151	-0.0518	-2.3318	6.6574	-29.7309		25.953	-0.205	2.853	1.2687	0.1048	6.8513
26.015	3.5067	0.0491	1.3246	2.5082	-0.0734	-0.0034	2.4269	-0.715	2.6031		26.015	0.0815	5.1222	1.7796	-0.0607	3.9562	-0.0711	2.4904	1.0159	4.6899		26	0.0425	-0.4203	-0.9825	-0.0099	0.0686	-0.6921	1.6021	1.5288	-3.839		26.016	-0.765	0.5447	1.4376	-0.4523	0.3203	-0.0664	-2.3318	7.6831	-30.0939		26.015	-0.1789	2.7878	1.2752	0.1286	6.1231
26.078	3.5718	0.0622	1.3181	2.6537	-0.0401	-0.001	2.0462	-0.715	2.8753		26.078	0.0946	5.0439	1.7666	-0.0309	3.7265	-0.0832	1.4752	0.7595	5.2343		26.062	0.0425	-0.4334	-1.0215	0.0024	0.0564	-0.7187	1.6655	1.3365	-4.9278		26.078	-0.8301	0.5447	1.4312	-0.4727	0.3134	-0.047	-1.38	7.2344	-30.1846		26.078	-0.1789	2.7356	1.2817	0.0622	5.7161
26.14	3.689	0.0622	1.3181	2.722	-0.0594	-0.0083	2.3	-0.5868	3.6011		26.14	0.0815	4.9657	1.7796	-0.0344	3.4003	-0.0783	-1.0628	0.8877	4.5992		26.125	0.0685	-0.4203	-1.067	-0.0064	0.0686	-0.7114	2.0462	2.1057	-5.2		26.141	-0.9213	0.5577	1.4376	-0.4642	0.3357	-0.0348	-1.7607	6.5933	-31.1827		26.14	-0.192	2.6574	1.2947	0.0724	5.1047
26.203	3.7281	0.1013	1.3181	2.8201	-0.0594	-0.0348	2.5538	-0.715	3.2382		26.203	0.0946	4.8614	1.7731	-0.0186	3.2688	-0.0711	-0.6821	1.4006	4.9621		26.187	0.0294	-0.4203	-1.0995	0.0024	0.0564	-0.738	2.0462	1.3365	-4.1112		26.203	-0.9994	0.5447	1.4441	-0.454	0.2945	-0.0445	-1.6338	6.4651	-31.1827		26.203	-0.1659	2.5661	1.2882	0.0792	4.5689
26.265	3.8062	0.0883	1.3181	2.8815	-0.0541	-0.0131	1.9193	0.3107	2.8753		26.265	0.0815	4.8092	1.7796	-0.0186	3.083	-0.0783	-0.809	0.8877	5.2343		26.25	0.0294	-0.4073	-1.1385	-0.0256	0.0599	-0.7574	2.2366	1.5288	-4.0205		26.266	-1.1036	0.5317	1.4441	-0.425	0.3065	-0.0494	-1.3166	5.8881	-31.7271		26.265	-0.1659	2.5139	1.3142	0.0469	4.1791
26.328	3.9104	0.0752	1.3181	3.0059	-0.0629	-0.0034	2.6173	0.3748	2.4216		26.328	0.0815	4.7179	1.7731	-0.0309	3.0005	-0.0856	0.7772	1.5929	4.9621		26.312	0.0034	-0.4334	-1.1839	-0.0029	0.023	-0.7839	1.031	1.3365	-4.0205		26.328	-1.1817	0.5317	1.4376	-0.4761	0.279	-0.047	-2.2049	6.2728	-31.3641		26.328	-0.1789	2.4226	1.3142	0.0315	3.5557
26.39	3.9755	0.1143	1.3181	3.0987	-0.0646	-0.0034	2.6807	-0.2021	2.3309		26.39	0.1076	4.6657	1.7731	-0.0274	2.9655	-0.0638	2.0462	0.6954	4.8714		26.375	0.0555	-0.4334	-1.2164	-0.0029	0.0301	-0.8178	1.729	1.657	-3.2946		26.391	-1.2599	0.5577	1.4506	-0.5971	0.2911	-0.047	-1.5704	7.0421	-30.729		26.39	-0.192	2.3966	1.3012	0.0009	3.3222
26.453	4.0537	0.1143	1.3181	3.2354	-0.0681	0.0038	1.9828	-1.0355	1.9679		26.453	0.1206	4.5875	1.7666	-0.0221	2.7989	-0.0952	2.0462	1.2082	3.8733		26.437	0.0555	-0.4334	-1.2749	-0.0256	0.0248	-0.8153	1.2214	1.5288	-3.9298		26.453	-1.338	0.5577	1.4312	-0.6346	0.3117	-0.0348	-1.4435	7.0421	-31.4549		26.453	-0.1789	2.3183	1.3142	0.0043	3.013
26.515	4.1318	0.1143	1.3246	3.3669	-0.0594	-0.0083	3.0614	-1.0997	2.8753		26.515	0.0425	4.5353	1.7731	-0.0379	2.6604	-0.088	1.3483	1.1441	4.7807		26.5	0.0555	-0.4203	-1.3074	0.0076	0.0336	-0.8323	1.3483	2.0416	-3.9298		26.516	-1.4031	0.5447	1.4312	-0.6976	0.2722	-0.03	-1.5704	7.8114	-31.7271		26.515	-0.1789	2.2401	1.3207	0.0264	2.6988
26.578	4.1969	0.1404	1.3116	3.444	-0.0559	0.0207	2.5538	-0.3304	2.3309		26.578	0.0946	4.4571	1.7666	-0.0151	2.4377	-0.059	0.0158	0.9518	4.1455		26.562	0.0425	-0.4334	-1.3594	0.0024	0.0353	-0.8637	1.3483	1.5288	-3.839		26.578	-1.4813	0.5577	1.4441	-0.7061	0.2602	-0.03	-1.2531	6.8497	-31.5456		26.578	-0.1659	2.1488	1.3077	0.0196	2.4309
26.64	4.2621	0.1665	1.3116	3.5263	-0.0576	0.0038	1.5386	-1.0997	1.605		26.64	0.1076	4.3528	1.7731	-0.0484	2.2921	-0.0638	-0.6186	0.5672	3.9641		26.625	0.0815	-0.4334	-1.3984	-0.0134	0.0511	-0.8661	1.7924	1.8493	-3.4761		26.641	-1.5725	0.5447	1.4441	-0.6959	0.2842	-0.0324	-1.1897	5.8881	-31.9993		26.64	-0.1789	2.0966	1.3207	-0.0111	2.108
26.703	4.3272	0.1274	1.3116	3.67	-0.0611	-0.0034	1.8559	-1.0355	2.5123		26.703	0.0946	4.2615	1.7731	-0.0186	2.1501	-0.0759	-0.9359	1.5288	3.7826		26.687	0.0685	-0.4203	-1.4309	0.0076	0.0301	-0.8975	1.2848	1.7211	-3.4761		26.703	-1.6506	0.5447	1.4312	-0.7078	0.2653	-0.0348	-1.8242	6.1446	-31.9085		26.703	-0.1789	2.0314	1.3207	-0.0025	1.9345
26.765	4.4444	0.1665	1.3311	3.7734	-0.0629	-0.0276	2.7442	-0.6509	2.0587		26.765	0.1206	4.1702	1.7731	-0.0344	1.966	-0.0807	-0.809	1.2723	2.7845		26.75	0.0555	-0.4334	-1.4894	-0.0204	0.0301	-0.9289	1.4752	1.5288	-4.0205		26.766	-1.7287	0.5447	1.4312	-0.7691	0.2859	-0.0348	-1.2531	5.9522	-32.1807		26.765	-0.1789	1.9532	1.3207	-0.0128	1.7594
26.828	4.5095	0.1535	1.3116	3.8785	-0.0769	-0.0058	1.6655	-0.715	1.7865		26.828	0.1206	4.1441	1.7731	-0.0449	1.9414	-0.0735	-0.3014	1.0159	3.0567		26.812	0.0555	-0.4334	-1.5219	-0.0379	0.0266	-0.9313	1.6021	1.657	-2.5688		26.828	-1.8199	0.5577	1.4182	-0.8628	0.2842	-0.0372	-1.6338	7.2344	-31.9993		26.828	-0.1789	1.888	1.3207	-0.0298	1.5636
26.89	4.6007	0.1535	1.3116	4.0468	-0.0594	0.0087	2.3635	-0.2663	1.605		26.89	0.0946	4.0267	1.7796	-0.0046	1.9432	-0.0542	0.46	0.3748	2.2401		26.875	0.0555	-0.4203	-1.5674	0.0182	0.0371	-0.9531	1.9828	1.9134	-3.2946		26.891	-1.885	0.5577	1.4247	-0.9531	0.279	-0.0324	-2.2683	7.4908	-31.7271		26.89	-0.1789	1.7967	1.3337	-0.0076	1.4279
26.953	4.6658	0.1665	1.3246	4.2045	-0.0453	-0.0155	1.729	-0.7791	0.9699		26.953	0.1076	3.9354	1.7666	-0.0221	1.845	-0.0783	1.4117	1.08	1.9679		26.937	0.0555	-0.4203	-1.6129	-0.0116	0.0388	-0.9917	2.1097	1.657	-3.839		26.953	-1.9501	0.5447	1.4312	-1.0247	0.2722	-0.047	-1.1897	8.3242	-32.1807		26.953	-0.1659	1.7054	1.3207	-0.0025	1.2957
27.015	4.7439	0.1795	1.3181	4.3166	-0.0453	-0.0107	2.6807	-1.0997	1.2421		27.015	0.0946	3.8702	1.7796	-0.0554	1.724	-0.059	0.1427	0.8236	2.5123		27	0.0685	-0.4073	-1.6519	0.0059	0.0564	-0.9893	1.6655	1.4647	-3.2039		27.016	-2.0413	0.5447	1.4182	-1.0485	0.2756	-0.0251	-1.1897	7.0421	-32.1807		27.015	-0.1659	1.6271	1.3207	-0.0145	1.2287
27.078	4.8221	0.1795	1.3051	4.441	-0.0401	-0.0131	2.5538	-0.5868	1.6957		27.078	0.1206	3.805	1.7731	-0.0537	1.5574	-0.0566	-0.5552	1.9134	2.6031		27.062	0.0815	-0.4073	-1.6779	-0.0064	0.0441	-1.0328	1.9193	1.8493	-3.0224		27.078	-2.1325	0.5447	1.4247	-1.1116	0.2773	-0.0567	-1.6973	6.9138	-32.3622		27.078	-0.1659	1.5489	1.3337	-0.0247	1.0398
27.14	4.9132	0.2056	1.3116	4.583	-0.0559	-0.0252	1.6655	-1.0997	1.1513		27.14	0.1076	3.6876	1.7601	-0.0327	1.4767	-0.059	0.0158	1.9775	2.6031		27.125	0.0685	-0.4073	-1.7104	-0.0064	0.0441	-1.0546	1.0945	1.657	-2.9317		27.141	-2.2106	0.5577	1.4182	-1.1899	0.2945	-0.0348	-1.4435	7.1703	-32.1807		27.14	-0.1659	1.4967	1.3402	-0.0349	0.8715
27.203	4.9784	0.2056	1.3116	4.7021	-0.0769	-0.0131	2.4269	-1.2279	0.5162		27.203	0.1336	3.6355	1.7731	-0.0204	1.3838	-0.0687	-0.3014	1.7852	0.9699		27.187	0.0685	-0.4073	-1.7818	0.0112	0.0476	-1.0763	1.9828	2.1699	-2.6595		27.203	-2.2887	0.5577	1.4182	-1.2479	0.3014	-0.0421	-1.6973	6.9138	-32.5437		27.203	-0.192	1.4315	1.3402	-0.0451	0.6757
27.265	5.0174	0.2187	1.3051	4.8073	-0.0383	-0.0203	1.9828	-1.1638	0.0625		27.265	0.0946	3.5572	1.7666	-0.0327	1.375	-0.0469	0.7138	1.4006	1.7865		27.25	0.0815	-0.4073	-1.8208	0.0094	0.0423	-1.1247	1.4752	1.657	-2.6595		27.266	-2.3408	0.5577	1.4052	-1.4012	0.2945	-0.0372	-0.9993	7.3626	-32.5437		27.265	-0.1659	1.3402	1.3532	-0.0196	0.5401
27.328	5.0825	0.1795	1.3051	4.9369	-0.0734	-0.0228	1.6655	-0.9714	0.8791		27.328	0.1076	3.492	1.7601	-0.0274	1.3803	-0.0397	0.9041	1.2082	1.4235		27.312	0.0815	-0.4073	-1.8403	-0.0414	0.0406	-1.1319	1.9193	1.8493	-2.478		27.328	-2.406	0.5577	1.4117	-1.4574	0.3237	-0.0543	-1.5704	7.4267	-32.8159		27.328	-0.1659	1.275	1.3467	-0.0417	0.5487
27.39	5.1737	0.2056	1.3051	5.0561	-0.0278	-0.0131	2.8076	-1.3561	0.1533		27.39	0.1206	3.4138	1.7601	-0.0134	1.2961	-0.0614	0.9676	1.4006	1.2421		27.375	0.0555	-0.4334	-1.8988	-0.0204	0.0301	-1.1778	1.7924	1.5929	-2.5688		27.391	-2.4841	0.5447	1.4117	-1.6022	0.3323	-0.047	-1.4435	7.5549	-33.2695		27.39	-0.192	1.1837	1.3662	-0.0213	0.4937
27.453	5.2519	0.2187	1.2986	5.2699	-0.0313	-0.0324	1.8559	-1.4202	-0.8448		27.453	0.1076	3.3225	1.7601	-0.0344	1.1173	-0.0614	-0.1111	1.5929	1.2421		27.437	0.0946	-0.4203	-1.9313	0.0059	0.0283	-1.173	1.9193	1.7211	-2.478		27.453	-2.5622	0.5447	1.4117	-1.6465	0.3529	-0.0518	-2.1414	7.3626	-32.6344		27.453	-0.1789	1.1055	1.3792	-0.0213	0.4765
27.515	5.33	0.2187	1.3051	5.3575	-0.0383	-0.0155	2.0462	-1.0997	-1.0263		27.515	0.0946	3.2312	1.7601	-0.0239	1.0331	-0.0566	-0.0476	1.7852	0.6977		27.5	0.0946	-0.4203	-1.9703	-0.0081	0.0108	-1.2455	1.3483	1.5288	-3.2039		27.516	-2.6274	0.5447	1.4117	-1.7538	0.358	-0.0494	-2.2049	7.1703	-32.6344		27.515	-0.1529	1.0272	1.3792	-0.0264	0.3615
27.578	5.3951	0.2578	1.3051	5.4924	-0.026	-0.0155	1.9193	-0.5868	-1.2078		27.578	0.1076	3.166	1.7471	-0.0362	0.9331	-0.0397	-0.6821	1.1441	0.6069		27.562	0.0946	-0.4203	-2.0093	-0.0204	0.0125	-1.2648	1.0945	1.7852	-2.478		27.578	-2.7185	0.5447	1.3987	-1.856	0.3786	-0.0348	-1.5069	7.619	-33.3603		27.578	-0.1789	0.949	1.3857	-0.0128	0.2447
27.64	5.4863	0.2448	1.2856	5.6449	-0.0524	0.0038	1.9193	-1.3561	-1.9336		27.64	0.1076	3.0747	1.7341	-0.0344	0.9244	-0.0469	-0.6186	1.3365	-0.3912		27.625	0.0815	-0.4203	-2.0483	-0.0081	0.0108	-1.2769	1.4752	1.9134	-3.3854		27.641	-2.7967	0.5577	1.3987	-1.948	0.3821	-0.0348	-1.8242	7.6831	-33.451		27.64	-0.1789	0.8447	1.3922	-0.0536	0.2138
27.703	5.5644	0.2708	1.2921	5.8043	-0.0401	-0.0034	2.4269	-1.4843	-1.3892		27.703	0.0815	3.0225	1.7536	-0.0186	0.891	-0.0469	-0.4283	0.6313	0.244		27.687	0.1076	-0.4203	-2.0873	-0.0274	-0.005	-1.3107	1.2214	1.9134	-2.2058		27.703	-2.8748	0.5577	1.3922	-2.1184	0.3649	-0.0372	-1.8242	8.196	-33.6325		27.703	-0.1789	0.7794	1.3987	-0.0298	0.1554
27.765	5.6165	0.2708	1.2856	5.9533	0.0108	0.0014	2.2366	-1.0355	-1.2078		27.765	0.1076	2.9052	1.7471	-0.0046	0.884	-0.0276	0.9676	1.0159	-0.7541		27.75	0.0815	-0.4203	-2.1328	-0.0151	-0.0103	-1.3542	1.7924	1.8493	-1.8429		27.766	-2.9399	0.5447	1.3922	-2.2359	0.3975	-0.0348	-2.649	7.1062	-33.3603		27.765	-0.1789	0.7142	1.4052	-0.0383	0.1434
27.828	5.7207	0.2708	1.2726	6.1303	-0.0225	0.0038	1.7924	-1.869	-2.0244		27.828	0.1076	2.853	1.7406	-0.0362	0.8419	-0.0517	-0.3014	1.2723	-0.9356		27.812	0.0815	-0.4073	-2.1913	-0.0099	-0.012	-1.3615	1.9828	1.9134	-2.7502		27.828	-2.992	0.5317	1.3987	-2.3705	0.4061	-0.0445	-2.5221	7.2344	-32.7251		27.828	-0.1659	0.623	1.4052	-0.057	0.0833
27.89	5.7858	0.2317	1.2921	6.2354	-0.0085	-0.0083	2.3635	-1.9331	-1.9336		27.89	0.1336	2.7748	1.7536	-0.0362	0.7122	-0.0421	-0.9359	1.5288	-1.3892		27.875	0.0815	-0.4203	-2.2238	0.0006	-0.012	-1.4436	1.9828	1.4006	-3.3854		27.891	-3.0832	0.5317	1.4052	-2.4881	0.3804	-0.03	-2.7759	7.619	-34.3583		27.89	-0.1659	0.5447	1.4052	-0.0417	0.085
27.953	5.877	0.2578	1.2791	6.3826	-0.0155	-0.0276	2.3635	-1.292	-2.3873		27.953	0.1466	2.7356	1.7276	-0.0484	0.6578	-0.0445	-0.6186	1.4647	-1.2985		27.937	0.0946	-0.4203	-2.2563	-0.0344	0.002	-1.4485	1.8559	2.1699	-2.0244		27.953	-3.1353	0.5056	1.3987	-2.6635	0.3786	-0.0421	-2.078	7.6831	-33.3603		27.953	-0.1789	0.4665	1.4052	-0.023	0.0249
28.015	5.9551	0.2839	1.2531	6.521	0.0073	-0.0131	2.6807	-1.9972	-3.3854		28.015	0.1597	2.6052	1.7341	-0.0011	0.621	-0.059	-0.6821	1.1441	-2.6595		28	0.0555	-0.3943	-2.2953	-0.0011	-0.0138	-1.4895	1.6021	1.7852	-3.6576		28.016	-3.2134	0.4925	1.3922	-2.7589	0.3924	-0.0275	-2.0145	7.7473	-34.3583		28.015	-0.1659	0.3752	1.4441	-0.0111	-0.0318
28.078	6.0072	0.2708	1.2661	6.6787	-0.0173	0.0014	3.1249	-2.8306	-3.0224		28.078	0.1076	2.527	1.7211	-0.0116	0.5929	-0.0324	-0.5552	1.2723	-2.1151		28.062	0.1466	-0.4203	-2.3278	-0.0221	0.0038	-1.5161	1.4752	2.0416	-1.9336		28.078	-3.2785	0.4795	1.3922	-2.9225	0.3958	-0.047	-2.078	8.5807	-34.1769		28.078	-0.1789	0.2969	1.4247	-0.0213	-0.073
28.14	6.1374	0.2839	1.2661	6.8189	-0.0033	-0.0155	2.1731	-1.7407	-3.3854		28.14	0.1336	2.4226	1.7146	-0.0291	0.628	-0.0493	0.2062	1.657	-3.2039		28.125	0.1336	-0.4464	-2.3797	-0.0414	-0.005	-1.562	0.46	2.1699	-2.3873		28.141	-3.3436	0.4665	1.3857	-3.0554	0.413	-0.0324	-1.8876	8.6448	-34.5398		28.14	-0.1789	0.2056	1.4182	-0.0622	-0.1692
28.203	6.1895	0.2839	1.2726	6.9188	-0.0296	-0.0058	2.9345	-1.9972	-3.3854		28.203	0.1336	2.3314	1.7406	-0.0379	0.6228	-0.0179	0.8407	1.0159	-3.839		28.187	0.0946	-0.4334	-2.4252	-0.0151	-0.0278	-1.5765	1.4117	1.8493	-2.2966		28.203	-3.3957	0.4665	1.3987	-3.2019	0.4061	-0.0372	-1.8242	8.8371	-34.0861		28.203	-0.1789	0.1535	1.4441	-0.0196	-0.219
28.265	6.3068	0.2969	1.2466	7.0362	-0.0068	-0.0131	2.3	-2.1254	-3.9298		28.265	0.1206	2.2792	1.7276	-0.0221	0.5719	-0.0542	-0.238	1.08	-3.7483		28.25	0.1206	-0.4203	-2.4577	-0.0169	-0.019	-1.6249	1.9828	1.9134	-2.478		28.266	-3.4739	0.4404	1.3922	-3.3637	0.3804	-0.0251	-2.7125	7.6831	-34.812		28.265	-0.1789	0.0752	1.4441	-0.0366	-0.2293
28.328	6.3328	0.31	1.2531	7.1729	-0.0243	-0.0107	2.5538	-2.2536	-3.5668		28.328	0.1336	2.227	1.7276	-0.0239	0.5772	-0.0228	1.0945	1.1441	-4.1112		28.312	0.0946	-0.4334	-2.5097	-0.0256	-0.0033	-1.6635	1.5386	2.1057	-1.7522		28.328	-3.565	0.4273	1.3987	-3.4949	0.4302	-0.0397	-2.5856	7.8114	-34.1769		28.328	-0.1529	0.0231	1.4441	-0.0332	-0.2945
28.39	6.45	0.31	1.2661	7.3657	-0.0594	-0.0083	2.3635	-2.4459	-4.0205		28.39	0.1336	2.1097	1.7276	-0.0362	0.4702	-0.0348	0.0793	1.4006	-3.9298		28.375	0.1076	-0.4073	-2.5487	0.0024	-0.0383	-1.7022	1.2214	1.7852	-1.8429		28.391	-3.6302	0.4143	1.3987	-3.5818	0.3804	-0.0397	-2.2683	7.619	-34.2676		28.39	-0.192	-0.0813	1.4506	-0.0502	-0.3152
28.453	6.4891	0.323	1.2401	7.4918	0.0318	-0.0058	2.998	-2.3177	-4.2927		28.453	0.1076	2.0705	1.7146	-0.0116	0.386	-0.0372	-1.1262	0.9518	-4.8371		28.437	0.0946	-0.4203	-2.5877	-0.0204	-0.0085	-1.7336	1.1579	2.1057	-2.2966		28.453	-3.6953	0.4143	1.3922	-3.81	0.3872	-0.0348	-2.078	7.6831	-34.4491		28.453	-0.192	-0.1595	1.4636	-0.0451	-0.4337
28.515	6.5672	0.31	1.2336	7.5987	-0.019	-0.0107	3.3787	-2.3177	-4.9278		28.515	0.1206	1.9662	1.7016	-0.0046	0.3895	-0.0469	-0.7455	1.3365	-4.5649		28.5	0.0685	-0.4203	-2.6267	-0.0327	0.0038	-1.7505	1.6655	1.5929	-2.2966		28.516	-3.7604	0.4013	1.3987	-3.9582	0.4233	-0.0421	-1.8242	8.9653	-34.0861		28.515	-0.192	-0.2247	1.4571	-0.0622	-0.4817
28.578	6.6584	0.323	1.2401	7.5304	-0.0208	-0.0252	2.8711	-1.4202	-3.6576		28.578	0.1076	1.888	1.7146	-0.0029	0.3387	-0.0493	-0.1111	1.7211	-4.6556		28.562	0.1076	-0.4334	-2.6592	-0.0186	-0.0453	-1.8085	1.2848	1.3365	-2.2966		28.578	-3.8255	0.3752	1.4052	-4.1048	0.4233	-0.0421	-2.7125	8.8371	-33.7232		28.578	-0.192	-0.2899	1.4831	-0.0519	-0.5504
28.64	6.6975	0.31	1.2401	7.2009	0.0143	-0.0131	3.569	0.4389	-4.4742		28.64	0.1206	1.8097	1.7146	-0.0186	0.3194	-0.0542	-0.4917	1.08	-6.2888		28.625	0.1076	-0.4073	-2.7177	0.0462	-0.0296	-1.7505	1.2214	1.657	-1.5707		28.641	-3.8776	0.3882	1.3922	-4.2632	0.3632	-0.0445	-3.6008	8.7089	-34.1769		28.64	-0.205	-0.3943	1.4896	-0.0349	-0.6329
28.703	6.6975	0.323	1.2401	6.7786	-0.0085	-0.001	2.3	1.4647	-2.841		28.703	0.1466	1.7054	1.6951	-0.0134	0.3387	-0.0493	0.9041	0.9518	-6.0166		28.687	0.0946	-0.4073	-2.7567	-0.0151	-0.0629	-1.8182	1.2214	2.0416	-2.1151		28.703	-3.9558	0.3752	1.3987	-4.3978	0.4783	-0.0445	-3.2835	8.773	-34.4491		28.703	-0.205	-0.4856	1.4961	-0.0605	-0.7204
28.765	6.6454	0.336	1.2336	6.6262	0.0599	-0.0107	2.5538	-0.8432	-0.4819		28.765	0.1466	1.6402	1.6951	-0.0134	0.3212	-0.0445	0.5234	1.08	-7.1962		28.75	0.0946	-0.3943	-2.7957	-0.0291	-0.0488	-1.8617	0.8407	2.4263	-2.0244		28.766	-4.0339	0.3621	1.3987	-4.6107	0.4319	-0.03	-2.5221	8.9012	-35.0842		28.765	-0.192	-0.5247	1.4961	-0.0622	-0.7634
28.828	6.5282	0.336	1.2271	6.2985	0.1072	-0.0155	3.2518	-2.3177	-0.9356		28.828	0.1466	1.5619	1.6886	-0.0204	0.2615	-0.0638	0.1427	1.08	-6.4703		28.812	0.0946	-0.4334	-2.8412	0.0339	-0.0348	-1.8834	1.3483	2.0416	-1.7522		28.828	-4.086	0.3491	1.3922	-4.8134	0.4611	-0.0251	-2.5221	8.9012	-34.4491		28.828	-0.205	-0.6421	1.5091	-0.0775	-0.8716
28.89	6.463	0.323	1.2401	5.9603	-0.0033	-0.0058	2.1731	-0.715	0.3347		28.89	0.1466	1.4706	1.6821	-0.0309	0.2545	-0.0517	-0.6186	1.3365	-6.4703		28.875	0.1076	-0.4334	-2.8802	0.0024	-0.0208	-1.9487	1.6021	1.9134	-1.3892		28.891	-4.1641	0.336	1.4052	-4.8782	0.4508	-0.0324	-2.649	8.9012	-35.0842		28.89	-0.205	-0.7073	1.5156	-0.0622	-0.9592
28.953	6.4109	0.3621	1.2336	5.6501	0.0651	-0.0324	2.2366	-0.3945	1.2421		28.953	0.1466	1.3663	1.6886	-0.0327	0.1966	-0.0397	-0.6186	1.8493	-6.924		28.937	0.1206	-0.4203	-2.9257	-0.0064	-0.0331	-1.9849	1.4117	1.7211	-1.2985		28.953	-4.2292	0.31	1.4052	-5.1082	0.4525	-0.0372	-2.9663	9.0935	-35.6286		28.953	-0.205	-0.7855	1.5286	-0.0843	-1.0467
29.015	6.3458	0.336	1.2271	5.3172	0.1528	-0.0252	2.8711	1.7852	0.5162		29.015	0.1466	1.3011	1.6821	-0.0011	0.144	-0.03	-0.1111	1.7211	-7.8313		29	0.1076	-0.4073	-2.9516	-0.0011	-0.0313	-2.0308	1.7924	2.1057	-1.48		29.016	-4.2813	0.2969	1.4052	-5.2836	0.5057	-0.0421	-2.7759	9.0294	-34.7213		29.015	-0.218	-0.8638	1.5351	-0.057	-1.1189
29.078	6.2807	0.336	1.2336	4.9667	0.0827	-0.0155	2.1731	2.6186	1.8772		29.078	0.1466	1.2098	1.6821	-0.0344	0.1388	-0.0469	0.1427	1.5929	-7.8313		29.062	0.0946	-0.4203	-3.0036	0.0112	-0.026	-2.0743	2.2366	1.5288	-1.7522		29.078	-4.3465	0.2969	1.4052	-5.425	0.4559	-0.0397	-2.3952	9.2858	-35.0842		29.078	-0.218	-0.942	1.5221	-0.0707	-1.2219
29.14	6.2026	0.323	1.2336	4.9615	0.0844	-0.0276	2.0462	-0.2021	2.966		29.14	0.1466	1.1316	1.6561	-0.0344	0.1037	-0.0421	-0.0476	1.5288	-8.4664		29.125	0.1076	-0.4073	-3.0296	-0.0362	-0.0313	-2.1082	1.4117	2.3622	-1.5707		29.141	-4.4246	0.2839	1.4117	-5.6431	0.4765	-0.0348	-2.2683	8.9012	-34.812		29.14	-0.218	-1.0072	1.5351	-0.0775	-1.3833
29.203	6.1114	0.336	1.2401	4.7512	0.116	-0.0083	2.998	0.3748	2.5123		29.203	0.1466	1.0664	1.6431	-0.0221	0.0388	-0.0421	-0.8724	1.5929	-8.8294		29.187	0.1206	-0.4464	-3.0686	-0.0134	-0.0506	-2.1903	1.2214	2.0416	-1.8429		29.203	-4.5027	0.2578	1.4052	-5.7709	0.4542	-0.0348	-2.5856	8.9653	-35.4471		29.203	-0.192	-1.1115	1.5416	-0.0826	-1.44
29.265	6.0072	0.336	1.2401	4.5374	0.1055	-0.0276	1.8559	0.503	2.966		29.265	0.1336	1.0011	1.6366	-0.0064	0.0055	-0.0421	-0.9359	1.657	-9.646		29.25	0.1206	-0.4334	-3.1206	0.0147	-0.0506	-2.2193	1.6021	1.5288	-1.48		29.266	-4.5679	0.2448	1.4052	-5.9088	0.4353	-0.0445	-2.8394	9.4782	-35.5379		29.265	-0.231	-1.1637	1.5481	-0.0588	-1.5843
29.328	5.903	0.3621	1.2596	4.2711	0.13	-0.0276	2.3635	0.8877	2.5123		29.328	0.1727	0.8968	1.6366	-0.0239	-0.0225	-0.0445	-0.238	1.4647	-10.0996		29.312	0.1206	-0.3943	-3.1596	-0.0274	-0.0331	-2.2821	1.729	1.657	-1.6614		29.328	-4.633	0.2317	1.4117	-6.1303	0.4628	-0.0372	-2.8394	8.7089	-35.5379		29.328	-0.218	-1.2419	1.5416	-0.0979	-1.6478
29.39	5.9291	0.336	1.2466	4.0415	0.1388	-0.03	2.1097	2.1699	2.3309		29.39	0.1076	0.8316	1.6366	-0.0046	-0.0208	-0.0445	-1.2531	1.3365	-10.3718		29.375	0.1076	-0.4203	-3.2116	-0.0309	-0.0506	-2.3184	2.0462	2.1057	-1.5707		29.391	-4.7111	0.2056	1.3987	-6.3484	0.5074	-0.0348	-2.9028	9.2858	-35.8101		29.39	-0.218	-1.3332	1.5481	-0.0809	-1.7989
29.453	5.8249	0.323	1.2401	3.7892	0.1528	-0.0107	2.8076	2.3622	3.1475		29.453	0.1466	0.7403	1.6301	-0.0081	-0.0383	-0.0469	-0.8724	1.4647	-9.0108		29.437	0.1076	-0.3812	-3.2506	-0.0116	-0.0453	-2.3619	2.2366	1.4006	-1.2985		29.453	-4.7632	0.1926	1.4052	-6.5647	0.4611	-0.03	-2.8394	9.2217	-35.5379		29.453	-0.218	-1.4115	1.5481	-0.1065	-1.8522
29.515	5.7598	0.336	1.2531	3.7138	0.13	-0.0445	1.9193	1.2082	3.6919		29.515	0.1206	0.6621	1.6236	-0.0099	-0.0366	-0.0421	-0.809	2.0416	-10.4626		29.5	0.1336	-0.4073	-3.2831	0.0217	-0.0646	-2.4416	1.6021	1.4006	-0.7541		29.516	-4.8413	0.1795	1.4052	-6.6993	0.5521	-0.0275	-2.649	9.5423	-36.0823		29.515	-0.2441	-1.4897	1.5481	-0.1065	-2.0548
29.578	5.6686	0.336	1.2596	3.6104	0.1318	-0.0252	1.9193	0.3107	4.2363		29.578	0.1336	0.5577	1.6236	-0.0221	-0.0173	-0.0445	0.3331	1.2723	-9.9182		29.562	0.0815	-0.4073	-3.3221	-0.0432	-0.0874	-2.4706	1.4117	1.7211	-1.2985		29.578	-4.8804	0.1665	1.4052	-6.9037	0.4662	-0.0445	-3.1566	9.5423	-36.5359		29.578	-0.218	-1.568	1.5416	-0.1133	-2.1407
29.64	5.6035	0.3752	1.2401	3.4264	0.1511	-0.03	2.1731	1.08	3.6919		29.64	0.1206	0.5056	1.6171	-0.0064	-0.0646	-0.0348	0.2062	1.4006	-9.9182		29.625	0.1076	-0.3682	-3.3741	-0.0081	-0.0664	-2.5141	1.4117	1.8493	-0.7541		29.641	-4.9976	0.1404	1.4117	-7.1014	0.5418	-0.0421	-3.4104	8.3883	-35.4471		29.64	-0.218	-1.6593	1.5416	-0.1099	-2.2746
29.703	5.5253	0.336	1.2661	3.2459	0.1318	-0.0397	1.8559	1.4006	3.9641		29.703	0.1597	0.4143	1.6106	-0.0134	-0.0892	-0.0493	-0.6821	1.0159	-10.8255		29.687	0.1206	-0.4073	-3.4131	-0.0064	-0.0576	-2.5794	1.9828	1.9134	-0.6634		29.703	-5.0758	0.1274	1.4117	-7.379	0.5469	-0.0372	-2.5856	9.4782	-35.5379		29.703	-0.218	-1.7114	1.5416	-0.0979	-2.3931
29.765	5.4472	0.3621	1.2596	2.9954	0.13	-0.0083	2.3635	2.0416	4.0548		29.765	0.1336	0.336	1.5976	-0.0379	-0.1733	-0.03	-0.8724	1.3365	-10.0089		29.75	0.1206	-0.3943	-3.4456	-0.0099	-0.0716	-2.6494	2.0462	1.7211	-0.3912		29.766	-5.1539	0.1013	1.4052	-7.517	0.4628	-0.03	-3.347	9.4782	-36.2637		29.765	-0.218	-1.7897	1.5221	-0.1013	-2.5477
29.828	5.356	0.3491	1.2791	2.8236	0.1265	-0.0131	1.9193	2.234	3.2382		29.828	0.1336	0.2448	1.6041	-0.0186	-0.2137	-0.0372	-0.9993	1.3365	-9.7367		29.812	0.1076	-0.3812	-3.5041	0.0094	-0.0594	-2.6833	2.1097	1.3365	-0.6634		29.828	-5.2321	0.0883	1.4117	-7.7487	0.559	-0.03	-2.0145	9.0294	-35.3564		29.828	-0.218	-1.894	1.5026	-0.1269	-2.783
29.89	5.317	0.3491	1.2791	2.7518	0.1002	-0.0228	1.4117	1.8493	3.1475		29.89	0.1466	0.1795	1.5911	-0.0256	-0.2487	-0.0445	-0.8724	1.3365	-9.5552		29.875	0.1076	-0.3943	-3.5365	-0.0099	-0.0611	-2.7703	1.7924	2.234	-0.4819		29.891	-5.2711	0.0752	1.4117	-7.5477	0.5006	-0.0397	-2.0145	8.0037	-34.812		29.89	-0.218	-1.9592	1.4831	-0.1099	-2.9238
29.953	5.1998	0.3621	1.2921	2.6186	0.1142	-0.0131	1.4752	1.5288	4.327		29.953	0.1336	0.0752	1.5976	0.0024	-0.2838	-0.0493	-0.4283	0.8877	-10.4626		29.937	0.0946	-0.3812	-3.595	-0.0169	-0.0541	-2.8113	2.0462	2.1057	-0.0282		29.953	-5.2711	0.0491	1.4117	-7.3876	0.4559	-0.0348	-2.4587	7.1703	-34.3583		29.953	-0.231	-2.0375	1.4506	-0.086	-3.0474
30.015	5.1346	0.336	1.2726	2.5065	0.1283	-0.0131	2.0462	1.5929	2.7845		30.015	0.1466	0.0361	1.5846	-0.0186	-0.2943	-0.0179	-0.6186	1.5929	-9.7367		30	0.0815	-0.3682	-3.621	-0.0046	-0.0524	-2.8693	2.4269	2.234	0.1533		30.016	-5.2451	0.0752	1.4117	-6.948	0.3769	-0.03	-2.2049	6.9138	-32.6344		30.015	-0.231	-2.1157	1.4247	-0.0979	-3.2518
30.078	5.0695	0.3752	1.2791	2.347	0.0949	-0.0131	1.9828	1.7852	3.3289		30.078	0.1206	-0.0552	1.5976	-0.0204	-0.2645	-0.03	-0.3648	1.08	-9.8274		30.062	0.1076	-0.3551	-3.6535	-0.0467	-0.0769	-2.9636	1.4117	1.8493	0.244		30.078	-5.193	0.0622	1.4117	-6.6874	0.4164	-0.03	-1.5704	7.4267	-31.3641		30.078	-0.2701	-2.194	1.4052	-0.086	-3.4871
30.14	4.9914	0.336	1.3116	2.2226	0.1002	-0.0155	1.9193	2.1057	3.0567		30.14	0.1336	-0.1595	1.5846	-0.0379	-0.2154	-0.0372	-0.9359	1.9134	-9.1923		30.125	0.1076	-0.3682	-3.7055	-0.0046	-0.0734	-3.0022	2.6807	1.5929	-0.3004		30.141	-5.1409	0.0752	1.4117	-6.3722	0.3529	-0.047	-1.8876	9.1576	-29.2773		30.14	-0.3092	-2.2592	1.3857	-0.0979	-3.712
30.203	4.9132	0.336	1.2986	2.0842	0.116	-0.03	0.7772	2.1057	2.0587		30.203	0.1597	-0.2117	1.5846	-0.0449	-0.2014	-0.0348	-0.1111	1.5929	-8.6479		30.187	0.0946	-0.3812	-3.751	0.0059	-0.0418	-3.0506	2.1731	1.7211	0.1533		30.203	-5.0627	0.0752	1.4182	-5.9838	0.322	-0.0275	-2.0145	6.0804	-29.368		30.203	-0.3222	-2.3374	1.3727	-0.149	-3.9422
30.265	4.8481	0.336	1.2986	2.0088	0.1212	-0.0131	1.1579	1.4647	3.6011		30.265	0.1206	-0.2899	1.5781	0.0006	-0.1944	-0.03	0.0793	2.1699	-7.1054		30.25	0.1076	-0.3943	-3.7965	0.0024	-0.0699	-3.1376	1.729	1.9134	-0.5726		30.266	-4.9976	0.0752	1.4117	-5.6295	0.3357	-0.03	-0.7455	4.7983	-28.2792		30.265	-0.3613	-2.4157	1.3727	-0.1678	-4.1122
30.328	4.7439	0.336	1.3051	1.9002	0.1318	-0.0252	2.0462	1.5929	2.7845		30.328	0.1336	-0.4073	1.5846	0.0076	-0.24	-0.0203	0.0158	1.3365	-7.4684		30.312	0.1076	-0.3551	-3.829	-0.0099	-0.0506	-3.1931	2.0462	2.234	-0.0282		30.328	-4.9455	0.0752	1.4117	-5.5307	0.2498	-0.0372	-1.4435	6.401	-27.644		30.328	-0.4003	-2.4939	1.3467	-0.1422	-4.3268
30.39	4.7049	0.3621	1.3246	1.809	0.1283	-0.0083	2.1731	2.1057	2.5123		30.39	0.1076	-0.4725	1.5651	-0.0221	-0.3154	-0.03	0.1427	1.7211	-8.0128		30.375	0.0946	-0.3682	-3.8745	-0.0151	-0.0734	-3.2608	1.8559	1.7852	0.4255		30.391	-4.8934	0.0622	1.4247	-5.1848	0.2516	-0.03	-1.5069	6.4651	-26.646		30.39	-0.4134	-2.5461	1.3402	-0.1473	-4.4728
30.453	4.6528	0.3491	1.3376	1.6864	0.1458	-0.0155	1.9828	1.5288	3.5104		30.453	0.1076	-0.5638	1.5716	-0.0151	-0.396	-0.0469	-0.5552	1.4006	-7.7406		30.437	0.1076	-0.3421	-3.9005	-0.0134	-0.0892	-3.2946	2.4904	2.4263	0.6977		30.453	-4.8023	0.0752	1.4182	-4.8663	0.2258	-0.0178	-0.6821	5.247	-26.3738		30.453	-0.4264	-2.6243	1.3337	-0.1473	-4.6858
30.515	4.5356	0.3621	1.3311	1.569	0.144	-0.0252	0.9676	2.1699	2.0587		30.515	0.1336	-0.6421	1.5716	0.0006	-0.4434	-0.03	-0.5552	1.1441	-8.8294		30.5	0.1206	-0.3682	-3.9525	-0.0169	-0.1032	-3.3937	1.8559	1.657	0.4255		30.516	-4.7111	0.0622	1.4247	-4.7283	0.1966	-0.0445	-1.4435	6.5292	-25.9201		30.515	-0.4655	-2.7156	1.3142	-0.1439	-5.0052
30.578	4.4574	0.3621	1.3311	1.434	0.1458	-0.0276	0.9041	2.4904	2.5123		30.578	0.1336	-0.6812	1.5716	-0.0081	-0.5293	-0.0517	-0.4917	1.8493	-9.3738		30.562	0.1206	-0.3551	-3.998	-0.0572	-0.0664	-3.4445	2.4904	1.5288	0.7884		30.578	-4.672	0.0752	1.4117	-4.4591	0.2103	-0.03	-1.3166	5.5035	-25.1942		30.578	-0.4785	-2.7678	1.3077	-0.1559	-5.2508
30.64	4.3793	0.3491	1.3506	1.3692	0.1581	-0.0203	0.8407	2.2981	3.0567		30.64	0.1727	-0.7594	1.5651	-0.0116	-0.5398	-0.0276	-0.6186	2.1057	-9.8274		30.625	0.1206	-0.316	-4.0435	-0.0204	-0.0892	-3.4976	2.1731	1.8493	1.1513		30.641	-4.6069	0.0883	1.4247	-4.1116	0.2207	-0.0445	-0.809	4.7342	-25.9201		30.64	-0.4655	-2.833	1.3012	-0.1456	-5.529
30.703	4.2881	0.336	1.3441	1.3026	0.1616	-0.0252	0.9676	1.7852	2.6031		30.703	0.1466	-0.9159	1.5586	-0.0099	-0.5872	-0.0445	-1.1262	1.3365	-10.4626		30.687	0.1076	-0.3421	-4.076	-0.0379	-0.0751	-3.5725	2.3	1.7211	0.5162		30.703	-4.5418	0.0752	1.4182	-3.9753	0.2035	-0.0348	-0.8724	4.5419	-25.6479		30.703	-0.4915	-2.9373	1.3077	-0.1388	-5.7351
30.765	4.223	0.336	1.3636	1.2851	0.116	-0.0542	1.1579	1.08	1.7865		30.765	0.1206	-0.929	1.5586	0.0041	-0.5872	-0.0493	-0.3648	1.5929	-10.9162		30.75	0.0946	-0.316	-4.102	-0.0204	-0.0787	-3.6233	2.9345	1.9775	0.1533		30.766	-4.4897	0.1013	1.4182	-3.8169	0.2155	-0.0445	-1.2531	5.4394	-25.5572		30.765	-0.5176	-3.0025	1.2817	-0.132	-5.8999
30.828	4.1579	0.31	1.3441	1.1905	0.1546	-0.0203	1.2214	1.1441	2.1494		30.828	0.1076	-1.0202	1.5586	0.0024	-0.6871	-0.0566	-0.6821	1.5288	-10.5533		30.812	0.1206	-0.316	-4.1344	-0.0011	-0.0944	-3.732	1.4752	1.9134	0.7884		30.828	-4.3985	0.1013	1.4182	-3.5579	0.188	-0.0348	-0.809	4.9906	-26.1923		30.828	-0.5566	-3.0808	1.2817	-0.1882	-6.2176
30.89	4.0797	0.31	1.3636	1.1116	0.1598	-0.0155	0.7772	1.5929	2.2401		30.89	0.1336	-1.1115	1.5521	0.0112	-0.7415	-0.0421	-0.809	1.9134	-10.0089		30.875	0.0815	-0.3421	-4.2124	-0.0151	-0.0874	-3.7755	1.9828	1.657	0.9699		30.891	-4.3334	0.1274	1.4182	-3.3705	0.1537	-0.03	0.0158	4.5419	-26.4645		30.89	-0.5827	-3.146	1.2882	-0.2189	-6.5336
30.953	4.0016	0.323	1.3636	1.0345	0.1458	-0.0252	1.2214	1.9134	1.5143		30.953	0.1597	-1.1637	1.5521	0.0112	-0.7766	-0.0252	0.1427	1.5929	-11.0977		30.937	0.0946	-0.3421	-4.2189	-0.0029	-0.0822	-3.8552	1.8559	1.657	1.3328		30.953	-4.2813	0.1274	1.4182	-3.1882	0.1794	-0.0445	-0.7455	5.0547	-25.5572		30.953	-0.5827	-3.2112	1.2882	-0.2138	-6.7483
31.015	3.9104	0.2969	1.3636	0.9486	0.1476	-0.0203	1.2848	2.1057	1.7865		31.015	0.1597	-1.255	1.5521	0.0006	-0.8642	-0.0324	-1.1897	1.9134	-11.1884		31	0.1206	-0.3421	-4.2774	-0.0309	-0.0751	-3.8867	2.8076	2.4904	1.605		31.016	-4.2032	0.1404	1.4182	-3.0025	0.1468	-0.0251	-1.1262	4.029	-25.1942		31.015	-0.5957	-3.2894	1.2947	-0.1729	-7.0677
31.078	3.8323	0.31	1.3636	0.854	0.1476	-0.0131	1.2214	2.5545	2.2401		31.078	0.1466	-1.3332	1.5521	-0.0081	-0.9011	-0.0397	-0.6821	1.5288	-10.5533		31.062	0.1076	-0.3291	-4.3229	-0.0186	-0.0699	-3.993	2.3635	1.657	0.7884		31.078	-4.1511	0.1665	1.4117	-2.7981	0.1571	-0.0251	-1.2531	3.7726	-24.6498		31.078	-0.5957	-3.3677	1.2947	-0.1661	-7.3906
31.14	3.7411	0.2708	1.3766	0.8277	0.1563	-0.0228	0.2696	1.7211	2.0587		31.14	0.1206	-1.4376	1.5521	-0.0256	-0.9291	-0.059	-1.38	2.234	-11.2792		31.125	0.0946	-0.3421	-4.3554	-0.0256	-0.0839	-4.0341	2.6173	2.2981	1.605		31.141	-4.0599	0.1535	1.4117	-2.672	0.1537	-0.0275	-0.8724	4.2854	-25.5572		31.14	-0.6087	-3.4459	1.2882	-0.178	-7.5778
31.203	3.676	0.31	1.3766	0.7892	0.1493	-0.0203	0.3965	2.234	1.3328		31.203	0.1727	-1.4897	1.5391	0.0041	-0.9694	-0.03	-0.0476	2.0416	-11.0977		31.187	0.1076	-0.3291	-4.3879	-0.0256	-0.1015	-4.1476	2.4269	1.4647	1.7865		31.203	-4.0078	0.1665	1.4117	-2.5034	0.1176	-0.03	-0.4917	4.6701	-25.285		31.203	-0.5957	-3.5242	1.2947	-0.2053	-7.7907
31.265	3.5588	0.2839	1.3766	0.7314	0.1616	-0.0252	0.0793	2.5545	1.1513		31.265	0.1466	-1.581	1.5391	0.0041	-1.0747	-0.0348	-0.1745	1.7852	-11.007		31.25	0.1076	-0.3291	-4.4334	-0.0151	-0.0699	-4.1597	2.8076	2.1057	2.2401		31.266	-3.9427	0.1795	1.4052	-2.3824	0.1434	-0.0421	-1.1897	4.8624	-25.0128		31.265	-0.6348	-3.5503	1.2882	-0.2376	-7.6585
31.328	3.4937	0.2969	1.3831	0.684	0.1388	-0.0203	0.3331	1.657	1.0606		31.328	0.1466	-1.6854	1.5261	-0.0099	-1.0922	-0.0469	-0.8724	1.7211	-11.007		31.312	0.0946	-0.316	-4.4659	-0.0256	-0.0734	-4.2612	2.3635	2.1699	1.9679		31.328	-3.8646	0.1795	1.4052	-2.2564	0.0987	-0.03	-0.6821	4.7342	-25.0128		31.328	-0.6478	-3.5503	1.2947	-0.2359	-7.0454
31.39	3.4025	0.2839	1.3896	0.6175	0.1633	-0.0155	0.0158	2.4904	1.2421		31.39	0.1466	-1.7245	1.5261	0.0129	-1.2448	-0.0324	-1.7607	1.2082	-10.8255		31.375	0.0946	-0.316	-4.5244	-0.0327	-0.0804	-4.3434	1.8559	2.1699	2.4216		31.391	-3.8125	0.2056	1.4052	-2.0485	0.1125	-0.0445	-1.4435	4.2213	-24.7406		31.39	-0.6478	-3.5242	1.2882	-0.2189	-6.4649
31.453	3.3244	0.2839	1.3766	0.5894	0.1668	-0.0131	0.46	1.4006	0.6977		31.453	0.1206	-1.8158	1.5456	0.0269	-1.2167	-0.0131	-0.9993	2.4904	-10.8255		31.437	0.1206	-0.303	-4.5504	-0.0274	-0.0892	-4.4159	2.4269	1.9775	2.1494		31.453	-3.7344	0.1926	1.3987	-1.9582	0.1073	-0.0372	-2.0145	4.029	-24.8313		31.453	-0.6478	-3.472	1.2817	-0.2155	-6.1833
31.515	3.2593	0.2839	1.3961	0.5544	0.1563	-0.0252	1.1579	1.7211	0.1533		31.515	0.1206	-1.9071	1.5261	0.0094	-1.3079	-0.0131	-1.1262	2.3622	-11.1884		31.5	0.1076	-0.2769	-4.6024	-0.0099	-0.0857	-4.4811	2.3	2.1057	1.4235		31.516	-3.6823	0.2187	1.3922	-1.7845	0.1348	-0.0324	-1.5704	3.9649	-24.1962		31.515	-0.6478	-3.4068	1.2817	-0.241	-5.6183
31.578	3.1681	0.2448	1.3896	0.4965	0.1581	-0.0034	0.46	2.0416	0.244		31.578	0.1466	-1.9853	1.5131	0.0339	-1.3465	-0.0348	-0.9993	1.7211	-11.1884		31.562	0.0946	-0.303	-4.6609	-0.0186	-0.1015	-4.5705	2.3	2.234	1.605		31.578	-3.6302	0.2187	1.3922	-1.7095	0.1245	-0.0445	-1.2531	4.4136	-24.1054		31.578	-0.6608	-3.3286	1.2817	-0.1933	-5.0859
31.64	3.09	0.2448	1.4026	0.4107	0.1633	-0.0155	-0.1745	2.5545	-0.0282		31.64	0.1466	-2.0635	1.5131	0.0199	-1.4201	0.0038	-0.4283	2.2981	-11.3699		31.625	0.1076	-0.2639	-4.6869	-0.0064	-0.0716	-4.6382	1.9193	2.234	2.2401		31.641	-3.539	0.2187	1.3857	-1.5801	0.1245	-0.0324	-0.7455	4.029	-24.3776		31.64	-0.6608	-3.2503	1.2817	-0.2427	-4.7922
31.703	3.0379	0.2708	1.4091	0.3581	0.1423	-0.0058	-0.1111	2.4904	-0.8448		31.703	0.1336	-2.1548	1.5196	0.0076	-1.4885	-0.0397	-1.5069	1.9775	-10.9162		31.687	0.0946	-0.2769	-4.7323	-0.0239	-0.0787	-4.7107	1.9193	2.234	2.6031		31.703	-3.4739	0.2317	1.3922	-1.5204	0.109	-0.0275	-0.6186	4.6701	-24.3776		31.703	-0.6608	-3.1851	1.2817	-0.207	-4.2994
31.765	2.9337	0.2187	1.4351	0.3371	0.1493	-0.001	0.1427	2.1057	-1.2078		31.765	0.1206	-2.207	1.5066	0.0147	-1.5902	-0.0324	-1.1262	2.1057	-11.5514		31.75	0.1076	-0.2378	-4.7713	-0.0221	-0.1015	-4.8339	1.8559	2.8109	2.6031		31.766	-3.3957	0.2448	1.3857	-1.3722	0.1176	-0.0445	-1.2531	4.5419	-23.8332		31.765	-0.6348	-3.1199	1.2752	-0.1916	-4.071
31.828	2.8555	0.2317	1.4416	0.3336	0.1528	-0.0203	-0.1745	1.1441	-1.48		31.828	0.1336	-2.2983	1.5196	0.0409	-1.6761	-0.0348	-1.0628	1.5288	-11.6421		31.812	0.1466	-0.2378	-4.8038	0.0024	-0.0874	-4.8702	1.9193	2.1057	2.3309		31.828	-3.3306	0.2317	1.3857	-1.224	0.1262	-0.0421	-1.8242	3.9649	-23.6518		31.828	-0.6087	-3.0156	1.2622	-0.1865	-3.7739
31.89	2.7644	0.2317	1.4351	0.2898	0.1511	-0.001	0.3965	1.5929	-1.2078		31.89	0.1597	-2.4287	1.5001	0.0409	-1.6831	-0.0397	-1.4435	1.7211	-12.4587		31.875	0.1076	-0.2378	-4.8428	-0.0064	-0.0822	-4.9137	2.0462	1.7211	1.6957		31.891	-3.2655	0.2578	1.3727	-1.1337	0.1039	-0.0372	-1.5069	3.7726	-23.7425		31.89	-0.5957	-2.9634	1.2752	-0.1644	-3.4424
31.953	2.6992	0.2187	1.4351	0.295	0.1423	-0.0155	0.6503	1.5929	-1.6614		31.953	0.1336	-2.4939	1.5001	0.0497	-1.741	-0.0131	-0.6821	1.9134	-12.4587		31.937	0.1206	-0.2378	-4.8883	-0.0186	-0.0909	-5.02	2.1097	2.1699	2.4216		31.953	-3.2004	0.2448	1.3792	-1.0213	0.0833	-0.047	-1.5069	4.1572	-23.3796		31.953	-0.5827	-2.8851	1.2687	-0.1678	-3.0646
32.015	2.6081	0.2187	1.4416	0.2355	0.1703	-0.0179	-0.238	2.1057	-2.0244		32.015	0.1336	-2.5591	1.4741	0.0199	-1.8585	-0.0203	-0.4283	1.9134	-12.8217		32	0.0946	-0.2247	-4.9338	-0.0099	-0.0611	-5.0852	1.7924	1.7211	2.8753		32.016	-3.1353	0.2448	1.3792	-0.9548	0.1262	-0.03	-1.6338	3.6443	-23.6518		32.015	-0.5696	-2.8199	1.2622	-0.1661	-2.9255
32.078	2.5169	0.2056	1.4546	0.1846	0.1581	-0.001	0.5234	2.3622	-2.478		32.078	0.1336	-2.6765	1.4676	0.0427	-1.9374	-0.0324	-1.6338	1.7211	-12.0958		32.062	0.0946	-0.2378	-4.9793	-0.0291	-0.0769	-5.1674	2.6173	2.0416	3.0567		32.078	-3.0702	0.2578	1.3792	-0.8475	0.0867	-0.0397	-1.4435	4.3495	-22.7444		32.078	-0.5436	-2.7287	1.2687	-0.1678	-2.7452
32.14	2.4388	0.2056	1.4676	0.1216	0.1546	-0.0203	-0.4283	2.2981	-2.7502		32.14	0.1076	-2.7156	1.4546	0.055	-2.0864	-0.0083	-0.9993	1.8493	-12.6402		32.125	0.1336	-0.2247	-5.0183	0.0129	-0.1015	-5.2761	1.729	2.2981	2.6031		32.141	-2.9529	0.2578	1.3727	-0.7691	0.1107	-0.0372	-1.8876	3.5161	-24.0147		32.14	-0.5045	-2.6374	1.2817	-0.1678	-2.6421
32.203	2.3606	0.1665	1.4741	0.118	0.1581	-0.0348	0.46	2.5545	-2.3873		32.203	0.0946	-2.7939	1.4741	0.0076	-2.2039	-0.03	-1.8242	1.9134	-12.0958		32.187	0.1076	-0.2247	-5.0573	-0.0116	-0.0699	-5.3462	2.1731	2.3622	2.966		32.203	-2.9269	0.2448	1.3662	-0.6414	0.0712	-0.0445	-1.7607	3.1315	-23.6518		32.203	-0.5045	-2.5852	1.3012	-0.1525	-2.4721
32.265	2.2695	0.1795	1.4806	0.1128	0.1633	-0.0107	0.5869	2.1699	-2.9317		32.265	0.0946	-2.9112	1.4416	0.0392	-2.2109	-0.0372	-0.9993	1.5929	-12.7309		32.25	0.1076	-0.2117	-5.0963	-0.0064	-0.0962	-5.4211	1.6655	2.4904	3.0567		32.266	-2.8357	0.2578	1.3597	-0.5715	0.0901	-0.0518	-1.8876	2.875	-23.1981		32.265	-0.4915	-2.507	1.3207	-0.1303	-2.1682
32.328	2.1653	0.1926	1.4936	0.1163	0.1458	-0.0083	0.46	1.5288	-3.6576		32.328	0.0425	-2.9634	1.4481	0.0059	-2.2443	-0.03	-1.3166	1.7852	-12.4587		32.312	0.1206	-0.2117	-5.1353	-0.0081	-0.0944	-5.4888	2.4269	2.234	2.6031		32.328	-2.7836	0.2578	1.3597	-0.5017	0.0884	-0.0518	-1.8242	2.8109	-22.563		32.328	-0.4785	-2.4548	1.3337	-0.161	-2.0067
32.39	2.0741	0.1795	1.4806	0.1443	0.1739	0.0038	0.9676	1.0159	-3.6576		32.39	0.0425	-3.0416	1.4351	0.0392	-2.3512	-0.0203	-0.8724	1.7211	-12.5495		32.375	0.0946	-0.2117	-5.1678	-0.0169	-0.1102	-5.5395	2.1731	2.7468	3.7826		32.391	-2.6794	0.2839	1.3467	-0.4727	0.1142	-0.0421	-1.7607	3.5161	-23.0166		32.39	-0.4915	-2.3635	1.3532	-0.1695	-1.8779
32.453	2.022	0.1404	1.4871	0.1286	0.1405	-0.0034	0.46	1.1441	-3.0224		32.453	0.0685	-3.0808	1.4351	0.0094	-2.5178	-0.0179	-0.9359	1.7852	-13.0939		32.437	0.1336	-0.2247	-5.2133	-0.0116	-0.0909	-5.6507	2.3	1.9775	2.6938		32.453	-2.5883	0.2578	1.3597	-0.4506	0.1159	-0.0348	-1.38	4.1572	-22.9259		32.453	-0.4915	-2.2722	1.3792	-0.1559	-1.7886
32.515	1.9309	0.1404	1.5001	0.0672	0.1493	-0.03	0.3331	1.657	-3.9298		32.515	0.0555	-3.1851	1.4221	0.0129	-2.5564	-0.0493	-2.078	2.0416	-12.368		32.5	0.0555	-0.1986	-5.2523	-0.0204	-0.0927	-5.7232	1.9828	1.7852	2.966		32.516	-2.5232	0.2578	1.3532	-0.4012	0.1142	-0.0372	-1.2531	4.029	-23.0166		32.515	-0.4915	-2.207	1.3857	-0.1525	-1.665
32.578	1.8788	0.1143	1.5131	0.0287	0.1668	-0.0107	0.46	2.5545	-4.0205		32.578	0.0164	-3.2503	1.4221	-0.0116	-2.6932	-0.0155	-1.4435	2.0416	-12.8217		32.562	0.1336	-0.1856	-5.3043	-0.0064	-0.0681	-5.7981	2.3	2.234	3.9641		32.578	-2.4711	0.2578	1.3467	-0.2751	0.1073	-0.0494	-1.9511	4.0931	-23.2888		32.578	-0.4785	-2.1288	1.4117	-0.1456	-1.4864
32.64	1.8137	0.1274	1.5066	0.0147	0.1633	-0.0083	0.9676	2.2981	-4.6556		32.64	0.0425	-3.3416	1.4221	0.0532	-2.7335	-0.0203	-1.0628	1.5288	-12.7309		32.625	0.1076	-0.1986	-5.3367	-0.0291	-0.1015	-5.9213	1.6655	2.7468	2.8753		32.641	-2.3799	0.2708	1.3532	-0.2291	0.1056	-0.0421	-1.7607	3.0033	-22.8352		32.64	-0.4785	-2.0505	1.4117	-0.1354	-1.3078
32.703	1.7746	0.0883	1.5131	0.0462	0.1598	-0.0252	0.5234	1.7211	-4.5649		32.703	0.0425	-3.4459	1.4091	0.0532	-2.9089	-0.0252	-1.9511	2.1699	-12.9124		32.687	0.1076	-0.1986	-5.3887	-0.0029	-0.0997	-5.9793	1.7924	2.1057	3.1475		32.703	-2.3148	0.2708	1.3402	-0.1831	0.1382	-0.0275	-1.5069	2.875	-23.6518		32.703	-0.4915	-1.9592	1.4312	-0.1337	-1.1481
32.765	1.7355	0.1013	1.5131	0.0199	0.1686	-0.0252	0.7138	1.5288	-5.1093		32.765	0.0555	-3.485	1.3961	0.0585	-2.9772	-0.0348	-1.38	1.7211	-13.6383		32.75	0.1076	-0.1856	-5.4277	-0.0256	-0.0559	-6.0615	2.1731	2.3622	2.6938		32.766	-2.2367	0.2839	1.3402	-0.1473	0.1159	-0.03	-1.6338	3.1315	-23.1981		32.765	-0.5045	-1.881	1.4376	-0.1048	-1.1017
32.828	1.6964	0.0883	1.5261	0.0199	0.144	-0.0348	0.1427	1.8493	-4.3834		32.828	0.0294	-3.6024	1.4026	0.0532	-3.0807	-0.0203	-1.5704	1.9134	-13.0031		32.812	0.1076	-0.1856	-5.4732	-0.0151	-0.1015	-6.1533	2.0462	2.3622	3.3289		32.828	-2.1325	0.2578	1.3402	-0.1235	0.1605	-0.03	-0.8724	2.7468	-23.561		32.828	-0.4785	-1.8027	1.4571	-0.1065	-1.0519
32.89	1.6313	0.0752	1.5326	-0.0134	0.1423	-0.0083	0.46	1.9134	-4.9278		32.89	0.0294	-3.6937	1.3961	0.0339	-3.1491	-0.0203	-1.8876	1.5929	-13.0031		32.875	0.1076	-0.1595	-5.4992	0.0112	-0.1032	-6.233	1.729	2.1699	2.966		32.891	-2.0673	0.2578	1.3402	-0.0979	0.121	-0.0445	-2.2683	3.2597	-22.563		32.89	-0.4785	-1.7245	1.4506	-0.1099	-0.9489
32.953	1.6183	0.0883	1.5261	0.0112	0.1563	-0.0228	0.9041	2.234	-5.1093		32.953	0.0294	-3.7067	1.3896	0.0304	-3.2788	-0.0107	-1.1262	1.7211	-14.0919		32.937	0.1206	-0.1595	-5.5642	-0.0204	-0.0927	-6.2693	2.4269	2.6186	3.1475		32.953	-1.9892	0.2578	1.3337	-0.103	0.1468	-0.0445	-0.9993	3.9008	-23.1074		32.953	-0.5045	-1.6462	1.4571	-0.0656	-0.7943
33.015	1.6053	0.0491	1.5521	0.0006	0.1493	-0.0445	0.0158	1.9775	-4.7464		33.015	0.0164	-3.785	1.3831	0.0672	-3.4524	-0.0131	-1.5069	1.8493	-14.1827		33	0.1206	-0.1726	-5.5772	0.0041	-0.0962	-6.4022	1.9828	2.5545	2.8753		33.016	-1.885	0.2578	1.3272	-0.0349	0.1743	-0.047	-2.2683	3.3879	-22.9259		33.015	-0.4915	-1.568	1.4506	-0.1099	-0.65
33.078	1.5662	0.0622	1.5456	0.0304	0.1511	-0.0324	0.8407	1.5288	-5.1093		33.078	0.0425	-3.8763	1.3766	0.0672	-3.5997	-0.0034	-1.7607	2.3622	-14.9993		33.062	0.0946	-0.1726	-5.6357	-0.0239	-0.0892	-6.4723	2.1731	2.1057	2.966		33.078	-1.8199	0.2708	1.3402	-0.0366	0.1588	-0.0348	-0.9993	3.0033	-23.0166		33.078	-0.4915	-1.4767	1.4571	-0.0775	-0.5178
33.14	1.5662	0.0622	1.5391	0.0129	0.1546	-0.0058	0.7138	2.5545	-5.0186		33.14	0.0294	-3.9676	1.3636	0.0444	-3.6751	-0.0203	-1.8242	1.9134	-14.2734		33.125	0.1076	-0.1726	-5.6747	-0.0169	-0.0822	-6.5834	1.8559	1.9134	3.0567		33.141	-1.7678	0.2708	1.3337	0.023	0.2155	-0.0227	-0.9993	2.7468	-22.0186		33.14	-0.5045	-1.4115	1.4701	-0.0911	-0.4972
33.203	1.5402	0.0622	1.5391	0.0094	0.1405	-0.03	0.3965	1.7211	-4.7464		33.203	0.0555	-4.0849	1.3636	0.069	-3.8189	-0.0276	-1.5704	2.2981	-14.9993		33.187	0.1076	-0.1856	-5.7137	-0.0204	-0.1032	-6.6898	2.0462	2.3622	2.3309		33.203	-1.6636	0.2708	1.3207	0.1099	0.1863	-0.0202	-1.38	3.0033	-23.2888		33.203	-0.4915	-1.3202	1.4701	-0.0792	-0.4852
33.265	1.5532	0.0622	1.5326	0.0076	0.1318	-0.0083	1.7924	1.4647	-4.9278		33.265	0.0555	-4.1501	1.3636	0.0918	-3.8768	-0.001	-2.4587	2.0416	-14.0919		33.25	0.1206	-0.1334	-5.7397	-0.0116	-0.0769	-6.7236	2.4904	1.7852	3.2382		33.266	-1.5725	0.2448	1.3077	0.1286	0.2155	-0.0275	-0.9993	2.7468	-22.563		33.265	-0.4915	-1.2289	1.4701	-0.0605	-0.3495
33.328	1.5402	0.0752	1.5261	0.0164	0.1581	-0.0107	0.3331	1.5288	-5.1093		33.328	0.0555	-4.2284	1.3311	0.0532	-4.0732	-0.0058	-1.7607	2.4904	-14.1827		33.312	0.1206	-0.1726	-5.7852	-0.0414	-0.0997	-6.8057	1.6021	2.4263	3.4197		33.328	-1.4943	0.2708	1.3077	0.1082	0.2121	-0.0372	-1.4435	2.9392	-21.7464		33.328	-0.4915	-1.1637	1.4701	-0.0656	-0.2207
33.39	1.5271	0.0361	1.5521	0.0199	0.1405	-0.0228	0.5869	1.1441	-5.2908		33.39	0.0294	-4.2806	1.3701	0.0567	-4.2941	-0.0179	-2.9663	2.8109	-14.0919		33.375	0.1466	-0.1465	-5.8307	-0.0029	-0.1067	-6.9507	2.1097	2.0416	2.7845		33.391	-1.4162	0.2708	1.3077	0.0895	0.2	-0.0518	-1.9511	3.5802	-22.0186		33.39	-0.4915	-1.0855	1.4766	-0.069	-0.1177
33.453	1.5141	0.0491	1.5456	0.0059	0.1405	-0.0324	0.0158	1.8493	-5.3815		33.453	0.0294	-4.3719	1.3376	0.083	-4.4292	-0.0203	-3.1566	2.234	-14.7271		33.437	0.0946	-0.1334	-5.8567	-0.0064	-0.0857	-7.045	1.9193	2.3622	3.1475		33.453	-1.312	0.2708	1.3077	0.0554	0.2138	-0.047	-1.0628	4.2213	-21.8371		33.453	-0.4915	-1.0202	1.4701	-0.0417	-0.0833
33.515	1.5011	0.0491	1.5456	-0.0029	0.1353	-0.0179	0.1427	2.234	-5.9259		33.515	0.0034	-4.4371	1.3181	0.0444	-4.5659	-0.0083	-2.7125	2.8109	-14.4549		33.5	0.0946	-0.1465	-5.9216	0.0041	-0.1032	-7.115	2.1731	1.9775	3.1475		33.516	-1.2469	0.2708	1.3142	0.1201	0.2447	-0.0567	-1.5704	3.452	-22.1093		33.515	-0.4915	-0.929	1.4701	-0.0673	-0.0473
33.578	1.462	0.01	1.5521	-0.1834	0.144	-0.0131	1.2214	3.3238	-4.8371		33.578	0.0555	-4.5414	1.3181	0.0742	-4.6448	-0.0155	-2.4587	2.5545	-14.8178		33.562	0.1206	-0.1465	-5.9866	-0.0099	-0.0997	-7.2069	2.7442	2.4263	2.966		33.578	-1.1557	0.2578	1.3012	0.19	0.2258	-0.0372	-1.5704	3.452	-22.1093		33.578	-0.4785	-0.8507	1.4701	-0.0536	0.0249
33.64	1.3709	0.01	1.5716	-0.1431	0.1458	-0.0083	0.7772	2.875	-5.3815		33.64	0.0555	-4.6066	1.3311	0.0602	-4.743	-0.0107	-2.3318	2.2981	-13.9105		33.625	0.0946	-0.1465	-5.9801	-0.0011	-0.0909	-7.289	1.6655	1.9775	2.6031		33.641	-1.0906	0.2708	1.2947	0.224	0.2395	-0.0202	-1.2531	3.0033	-22.2908		33.64	-0.4785	-0.7725	1.4701	-0.0519	0.0438
33.703	1.2667	0.01	1.5781	-0.1606	0.1212	-0.0228	0.2062	2.5545	-6.1981		33.703	0.0425	-4.6718	1.3246	0.0848	-4.8974	0.0159	-2.2683	3.0033	-15.5437		33.687	0.1206	-0.1204	-6.0256	-0.0064	-0.0751	-7.3833	2.4269	2.4904	2.6031		33.703	-1.0124	0.2578	1.2947	0.2155	0.2687	-0.0421	-1.8876	3.1315	-22.2908		33.703	-0.4915	-0.6942	1.4636	-0.0485	0.109
33.765	1.1885	-0.003	1.5716	-0.0642	0.123	-0.0155	0.46	0.8877	-5.8352		33.765	0.0034	-4.7631	1.3116	0.0777	-5.0867	0.0111	-2.3952	2.6186	-15.4529		33.75	0.1206	-0.1074	-6.0711	0.0024	-0.0699	-7.4823	1.8559	2.4263	3.5104		33.766	-0.9083	0.2708	1.2817	0.2257	0.2172	-0.0372	-1.0628	2.5545	-22.563		33.765	-0.4785	-0.629	1.4766	-0.0451	0.1743
33.828	1.0974	0.01	1.5846	-0.0362	0.1651	0.0087	0.7772	0.9518	-7.2869		33.828	0.0164	-4.8413	1.3311	0.0725	-5.1902	-0.0155	-2.9663	2.4263	-14.7271		33.812	0.1076	-0.1334	-6.1166	-0.0151	-0.0839	-7.5742	2.1731	2.1057	3.5104		33.828	-0.8301	0.2708	1.2947	0.1797	0.2773	-0.0421	-1.7607	3.0033	-21.5649		33.828	-0.4785	-0.5508	1.4701	-0.0179	0.2464
33.89	1.0192	-0.003	1.5716	-0.0835	0.1528	-0.0034	0.5234	0.5672	-6.6518		33.89	0.0425	-4.9326	1.3246	0.0953	-5.3287	-0.0179	-3.7911	2.7468	-14.2734		33.875	0.1206	-0.1204	-6.1556	-0.0239	-0.0892	-7.6805	2.1731	2.1057	2.5123		33.891	-0.739	0.2839	1.2817	0.2274	0.2121	-0.0567	-1.7607	3.5161	-21.9278		33.89	-0.5045	-0.4725	1.4701	-0.0349	0.3357
33.953	0.915	-0.0161	1.5781	-0.087	0.1493	-0.0179	0.8407	1.2723	-7.1054		33.953	0.0425	-5.0239	1.3051	0.0795	-5.5269	-0.0034	-2.9028	3.1315	-15.5437		33.937	0.1076	-0.1204	-6.1946	0.0076	-0.0646	-7.6708	2.6173	2.1699	2.7845		33.953	-0.6869	0.2708	1.2947	0.2769	0.2035	-0.0348	-1.6338	2.875	-21.6556		33.953	-0.4915	-0.3812	1.4701	-0.0758	0.3769
34.015	0.8629	-0.0422	1.5716	-0.115	0.1458	-0.03	1.1579	1.8493	-7.1962		34.015	0.0425	-5.0891	1.3116	0.0883	-5.6549	-0.0155	-2.3318	2.6827	-14.4549		34	0.1076	-0.1204	-6.2011	-0.0081	-0.0804	-7.5838	2.6173	1.9134	2.3309		34.016	-0.5957	0.2708	1.2817	0.2734	0.2653	-0.0397	-1.5069	2.6186	-21.0205		34.015	-0.4785	-0.303	1.4766	-0.0332	0.3615
34.078	0.7978	-0.003	1.5781	-0.2061	0.1283	-0.03	0.1427	2.7468	-7.7406		34.078	0.0555	-5.1282	1.2986	0.083	-5.7724	-0.001	-3.347	3.1956	-15.7251		34.062	0.1076	-0.1074	-6.1946	-0.0046	-0.0524	-7.3374	2.0462	2.234	2.1494		34.078	-0.5045	0.2578	1.2882	0.2837	0.1863	-0.0494	-2.078	3.452	-22.2908		34.078	-0.4915	-0.2247	1.4636	-0.0519	0.3632
34.14	0.7197	-0.0161	1.5846	-0.2359	0.144	-0.0131	0.2696	3.1315	-6.3796		34.14	0.0294	-5.2587	1.3116	0.0883	-6.0161	0.0087	-3.1566	2.875	-15.9973		34.125	0.1076	-0.0813	-6.1426	-0.0151	-0.0313	-7.161	1.4752	2.1699	2.6031		34.141	-0.4394	0.2578	1.2817	0.2956	0.2121	-0.03	-1.1897	2.9392	-22.6537		34.14	-0.4915	-0.1595	1.4506	-0.0536	0.4611
34.203	0.6415	-0.0161	1.5911	-0.2762	0.1318	-0.0179	0.46	2.9392	-7.3776		34.203	0.0555	-5.2978	1.3051	0.1093	-6.1564	0.0111	-2.9663	2.6827	-15.6344		34.187	0.1466	-0.1334	-6.1101	-0.0046	-0.0103	-6.9411	1.729	2.0416	2.1494		34.203	-0.3482	0.2708	1.2882	0.3092	0.2567	-0.047	-1.8242	3.3238	-21.6556		34.203	-0.4915	-0.0813	1.4506	-0.0059	0.4989
34.265	0.5764	-0.0422	1.5976	-0.1763	0.1265	-0.0252	-0.0476	1.9134	-7.922		34.265	0.0685	-5.4021	1.2921	0.0812	-6.216	0.0014	-3.0297	3.2597	-15.09		34.25	0.1336	-0.1204	-6.0776	-0.0379	0.002	-6.7357	2.1097	2.0416	2.1494		34.266	-0.2701	0.2578	1.2752	0.3467	0.188	-0.03	-0.9993	2.7468	-22.3815		34.265	-0.4915	0.0231	1.4441	-0.0417	0.5693
34.328	0.4592	-0.0552	1.6041	-0.1939	0.137	-0.0155	0.7138	2.6827	-8.3757		34.328	0.0034	-5.4804	1.2986	0.104	-6.344	-0.0179	-2.2683	3.0033	-15.6344		34.312	0.1206	-0.1074	-6.0191	-0.0309	0.023	-6.5834	1.8559	1.7852	1.605		34.328	-0.205	0.2578	1.2752	0.3603	0.2258	-0.0397	-1.6338	3.0033	-21.1112		34.328	-0.4915	0.0883	1.4506	-0.0281	0.6036
34.39	0.368	-0.0682	1.5911	-0.1728	0.144	-0.0083	0.2062	1.2723	-8.6479		34.39	0.0425	-5.5586	1.2921	0.0812	-6.5316	-0.0131	-3.4739	2.4263	-17.0861		34.375	0.1336	-0.1204	-5.9801	-0.0011	0.0318	-6.4505	1.729	2.0416	1.8772		34.391	-0.1268	0.2708	1.2622	0.3671	0.2327	-0.0251	-1.6973	3.452	-22.2		34.39	-0.5045	0.1795	1.4441	-0.0366	0.6259
34.453	0.2899	-0.0682	1.5911	-0.2464	0.144	-0.0083	0.46	1.9134	-8.1942		34.453	0.0294	-5.6108	1.2661	0.1198	-6.7245	-0.001	-3.347	2.8109	-15.7251		34.437	0.1076	-0.1204	-5.9476	-0.0151	0.0529	-6.2935	1.8559	2.0416	1.605		34.453	-0.0227	0.2578	1.2687	0.3433	0.2018	-0.0348	-0.9993	3.2597	-21.7464		34.453	-0.4785	0.2708	1.4376	-0.0196	0.5985
34.515	0.2248	-0.0682	1.5911	-0.2727	0.1353	-0.0131	0.2696	2.875	-8.1035		34.515	0.0294	-5.7021	1.2856	0.083	-6.9367	0.0062	-2.9028	2.875	-15.7251		34.5	0.1597	-0.1074	-5.9216	-0.0239	0.0511	-6.1122	1.6021	2.2981	2.0587		34.516	0.0685	0.2578	1.2752	0.362	0.2172	-0.047	-1.1897	3.5802	-21.4742		34.515	-0.4915	0.3491	1.4312	-0.0673	0.6569
34.578	0.1336	-0.0682	1.5846	-0.3463	0.1283	-0.0179	0.6503	2.7468	-8.8294		34.578	0.0164	-5.7933	1.2726	0.1286	-7.091	-0.001	-4.1718	2.875	-16.5417		34.562	0.1076	-0.1204	-5.8697	0.0024	0.0353	-5.9793	1.1579	1.7211	1.5143		34.578	0.1336	0.2839	1.2687	0.3654	0.1897	-0.0348	-1.2531	4.2854	-21.4742		34.578	-0.4785	0.4143	1.4312	-0.04	0.7118
34.64	0.0685	-0.0813	1.5846	-0.3498	0.1283	-0.0058	0.7138	3.0674	-9.0108		34.64	0.0164	-5.8455	1.2726	0.0953	-7.219	-0.0107	-3.7277	2.8109	-15.3622		34.625	0.0946	-0.0943	-5.8242	-0.0186	0.0634	-5.7787	1.2848	2.7468	0.9699		34.641	0.2248	0.2708	1.2752	0.3927	0.1794	-0.0275	-0.6186	3.2597	-22.1093		34.64	-0.4785	0.4925	1.4247	-0.0196	0.8595
34.703	-0.0357	-0.0682	1.5846	-0.32	0.1125	-0.0083	0.9676	2.6827	-10.644		34.703	0.0294	-5.9629	1.2856	0.111	-7.3085	-0.0034	-3.2201	2.5545	-15.9066		34.687	0.1206	-0.1334	-5.7852	-0.0029	0.0686	-5.6555	1.6021	2.5545	1.1513		34.703	0.3029	0.2708	1.2687	0.5017	0.1932	-0.0445	-1.7607	3.2597	-21.202		34.703	-0.4915	0.5708	1.4182	-0.0162	0.8801
34.765	-0.1138	-0.0682	1.6041	-0.3008	0.1072	-0.001	0.6503	2.1057	-10.4626		34.765	0.0425	-6.0151	1.2726	0.0935	-7.575	-0.0083	-4.2353	2.8109	-17.0861		34.75	0.1466	-0.1074	-5.7397	-0.0309	0.0721	-5.5492	1.6655	2.1057	0.8791		34.766	0.368	0.2578	1.2687	0.5307	0.1434	-0.0348	-1.38	2.6186	-21.6556		34.765	-0.4915	0.6621	1.4117	-0.0332	0.9076
34.828	-0.205	-0.0682	1.5846	-0.3235	0.1511	-0.0034	1.2214	1.7852	-9.7367		34.828	0.0294	-6.0933	1.2921	0.0953	-7.724	-0.001	-4.0449	2.4904	-16.2695		34.812	0.1206	-0.1204	-5.7137	-0.0379	0.0792	-5.3414	1.6021	2.1699	0.5162		34.828	0.4462	0.2578	1.2557	0.5596	0.1588	-0.0348	-0.4283	2.1699	-21.7464		34.828	-0.4655	0.7403	1.4052	-0.0468	0.9694
34.89	-0.2571	-0.0813	1.5911	-0.3078	0.1177	-0.0083	1.2214	1.1441	-9.7367		34.89	0.0555	-6.1194	1.2661	0.1163	-7.433	0.0062	-2.4587	3.1956	-15.09		34.875	0.1206	-0.0943	-5.6682	-0.0414	0.0827	-5.2181	1.2214	2.0416	0.7884		34.891	0.5374	0.2578	1.2557	0.5903	0.152	-0.0348	-1.38	3.0033	-21.4742		34.89	-0.4785	0.8186	1.3922	-0.0366	1.0141
34.953	-0.3613	-0.0682	1.5781	-0.3656	0.1265	-0.0228	0.5869	2.1699	-9.7367		34.953	0.0425	-6.1324	1.2791	0.1075	-6.7333	0.0038	1.2214	2.8109	-14.3641		34.937	0.1206	-0.1074	-5.6292	-0.0099	0.0651	-5.0925	0.6503	1.4647	0.1533		34.953	0.6025	0.2578	1.2557	0.5648	0.1193	-0.0275	-0.4917	2.7468	-21.5649		34.953	-0.4655	0.9099	1.3727	-0.0247	1.0776
35.015	-0.4394	-0.0682	1.5651	-0.4006	0.0844	-0.0203	0.2696	2.6186	-10.0996		35.015	0.0294	-6.0933	1.2791	0.0953	-6.2335	-0.0107	0.6503	2.6186	-11.0977		35	0.1206	-0.1074	-5.5837	-0.0449	0.1002	-4.9475	1.1579	1.9775	0.5162		35.016	0.6936	0.2708	1.2687	0.5733	0.1451	-0.0348	-0.9359	3.1956	-21.7464		35.015	-0.4655	0.9751	1.3662	-0.0332	1.1755
35.078	-0.5045	-0.0682	1.5716	-0.4444	0.1423	0.0087	0.5234	2.4904	-9.1923		35.078	0.0425	-6.0151	1.2791	0.076	-6.1687	-0.001	-2.4587	2.5545	-10.4626		35.062	0.1336	-0.1204	-5.5382	-0.0397	0.0739	-4.875	1.0945	2.4263	0.6977		35.078	0.7848	0.2839	1.2622	0.6142	0.0936	-0.0421	-1.1262	3.6443	-21.3834		35.078	-0.4524	1.0664	1.3532	-0.0264	1.3026
35.14	-0.5957	-0.0943	1.5716	-0.4725	0.1142	-0.0058	0.5234	3.1315	-10.1904		35.14	0.0294	-5.9368	1.2661	0.0865	-5.7057	-0.0276	-1.2531	2.1057	-6.8332		35.125	0.1076	-0.0943	-5.4992	-0.0081	0.0879	-4.7421	1.2214	1.5288	0.1533		35.141	0.8629	0.2708	1.2687	0.7215	0.0781	-0.0324	-1.5704	2.6827	-21.0205		35.14	-0.4524	1.1446	1.3402	-0.0298	1.3953
35.203	-0.6608	-0.0682	1.5586	-0.4918	0.0844	-0.0203	0.0793	3.3238	-10.2811		35.203	0.0555	-5.8977	1.2726	0.0777	-5.4936	-0.0083	-1.2531	3.0033	-5.0186		35.187	0.1206	-0.1204	-5.4667	-0.0239	0.0757	-4.6358	1.0945	2.1699	0.3347		35.203	0.9281	0.2708	1.2687	0.8067	0.0472	-0.0616	-0.8724	2.6186	-21.6556		35.203	-0.4394	1.2359	1.3272	-0.0315	1.5894
35.265	-0.7259	-0.1074	1.5586	-0.4848	0.102	-0.0083	1.6655	2.6186	-9.5552		35.265	0.0425	-5.7803	1.2596	0.0935	-5.0464	-0.0421	0.3331	2.6827	-5.563		35.25	0.1336	-0.1334	-5.4277	-0.0169	0.0721	-4.5391	0.5869	1.657	1.4235		35.266	1.0062	0.2578	1.2752	0.8816	0.0609	-0.0372	-1.4435	2.2981	-21.6556		35.265	-0.4264	1.2881	1.3142	-0.0673	1.725
35.328	-0.8431	-0.1074	1.5326	-0.4935	0.1142	-0.0083	1.7924	2.7468	-9.9182		35.328	0.0164	-5.689	1.2726	0.076	-4.6256	-0.0324	1.729	2.6827	-3.2039		35.312	0.1076	-0.1074	-5.4017	-0.0379	0.0792	-4.3917	0.7772	1.9775	0.0625		35.328	1.0843	0.2708	1.2687	0.9089	-0.0043	-0.0372	-0.6821	2.5545	-21.6556		35.328	-0.4134	1.3793	1.3077	-0.0434	1.9105
35.39	-0.9083	-0.0682	1.5261	-0.483	0.0897	-0.0107	0.9676	2.5545	-10.0089		35.39	0.0164	-5.6629	1.2791	0.062	-4.3766	-0.0155	1.729	2.6827	-2.841		35.375	0.1076	-0.1204	-5.3497	-0.0449	0.1002	-4.2854	0.8407	1.9134	-0.119		35.391	1.1755	0.2578	1.2687	0.9327	0.006	-0.0664	-0.0476	3.1956	-20.6576		35.39	-0.4134	1.4446	1.2882	-0.0553	2.0393
35.453	-1.0124	-0.0552	1.5131	-0.5093	0.109	-0.001	1.2848	2.1057	-10.0996		35.453	-0.0227	-5.5325	1.2791	0.0637	-4.2696	-0.0228	0.0158	1.9775	-2.5688		35.437	0.1206	-0.1204	-5.3108	-0.0291	0.0809	-4.1718	0.9676	1.9134	0.6069		35.453	1.2667	0.2578	1.2817	1.0094	-0.0232	-0.0494	-0.9993	3.1315	-20.839		35.453	-0.4003	1.5098	1.2882	0.023	2.2729
35.515	-1.0385	-0.0943	1.5066	-0.5426	0.0792	-0.0324	-0.1111	2.234	-10.5533		35.515	-0.0096	-5.5064	1.2791	0.0287	-4.0592	-0.0107	0.0158	2.6186	-0.8448		35.5	0.1336	-0.1334	-5.2588	-0.0432	0.1125	-4.0727	1.4117	2.3622	0.4255		35.516	1.3318	0.2708	1.2817	1.0332	-0.0335	-0.0518	-0.8724	3.2597	-21.202		35.515	-0.4003	1.588	1.2882	-0.0128	2.4841
35.578	-1.1427	-0.1074	1.4936	-0.6057	0.0616	0.0038	0.7138	3.1956	-10.0089		35.578	-0.0096	-5.4282	1.2791	0.055	-3.8084	-0.0397	1.5386	2.1057	-1.3892		35.562	0.1466	-0.1334	-5.2198	-0.0397	0.123	-3.9978	1.0945	2.1699	0.4255		35.578	1.4099	0.2839	1.2817	1.1235	0.0026	-0.0348	-0.4917	2.7468	-21.202		35.578	-0.3873	1.6663	1.2817	-0.0434	2.8241
35.64	-1.2208	-0.0943	1.4806	-0.6863	0.0757	-0.0469	0.5869	2.9392	-9.8274		35.64	-0.0227	-5.3499	1.2856	0.0217	-3.5892	-0.0252	1.8559	2.4263	-0.9356		35.625	0.1336	-0.1334	-5.1938	-0.0291	0.1055	-3.906	0.7772	1.9775	-0.2097		35.641	1.4881	0.2708	1.2817	1.236	-0.0215	-0.0397	-0.6821	2.2981	-21.8371		35.64	-0.3743	1.7315	1.2687	-0.0008	3.0422
35.703	-1.338	-0.0943	1.4741	-0.681	0.0739	-0.0252	0.0793	2.8109	-11.1884		35.703	-0.0357	-5.2456	1.2856	0.0532	-3.3718	-0.0228	2.8076	1.7211	-1.0263		35.687	0.1206	-0.1334	-5.1418	-0.0046	0.116	-3.7803	0.46	2.1699	-0.4819		35.703	1.5402	0.2969	1.2817	1.2956	-0.0301	-0.0348	-0.238	1.9775	-21.5649		35.703	-0.3873	1.7967	1.2882	-0.0111	3.3617
35.765	-1.3771	-0.1074	1.4611	-0.6915	0.0739	-0.0107	0.9041	3.2597	-10.2811		35.765	-0.0227	-5.1935	1.2986	0.0234	-3.2297	-0.0228	1.2848	2.6186	-0.6634		35.75	0.1076	-0.1465	-5.1028	-0.0362	0.0844	-3.6813	0.9041	1.5929	0.1533		35.766	1.6313	0.31	1.2817	1.3944	0.0077	-0.047	-0.7455	2.3622	-21.8371		35.765	-0.3613	1.8749	1.2752	-0.0145	3.6364
35.828	-1.4813	-0.0813	1.4416	-0.7318	0.1107	-0.0083	0.6503	2.6186	-11.2792		35.828	-0.0227	-5.1022	1.2856	0.0217	-3.1368	-0.001	1.031	2.234	-0.4819		35.812	0.1206	-0.1334	-5.0638	-0.0484	0.0967	-3.5798	-0.0476	2.0416	0.1533		35.828	1.7095	0.336	1.2817	1.3723	-0.0524	-0.0348	-0.6186	3.2597	-21.1112		35.828	-0.3743	1.914	1.2752	-0.0059	3.9541
35.89	-1.5464	-0.0813	1.4156	-0.7634	0.0721	-0.03	0.0158	2.6186	-11.4606		35.89	-0.0487	-5.0109	1.2921	0.048	-3.0334	-0.0228	1.0945	2.1699	-0.5726		35.875	0.1206	-0.1465	-5.0183	-0.0186	0.0879	-3.5	0.0158	2.1057	-0.2097		35.891	1.7746	0.3491	1.2752	1.454	-0.0181	-0.0567	-0.0476	3.1956	-20.4761		35.89	-0.3613	2.0053	1.2817	-0.0111	4.2306
35.953	-1.6636	-0.0943	1.4156	-0.7879	0.0441	-0.0034	0.6503	2.875	-11.3699		35.953	-0.0096	-4.9326	1.2856	0.076	-2.8966	-0.0517	0.8407	2.1699	-0.5726		35.937	0.1206	-0.1595	-4.9728	-0.0186	0.0949	-3.4082	0.5869	2.0416	-0.119		35.953	1.8527	0.3621	1.2817	1.5767	-0.0352	-0.0567	-0.1745	3.3238	-22.2		35.953	-0.3352	2.0705	1.2687	-0.0008	4.5123
36.015	-1.7027	-0.0943	1.3961	-0.8247	0.0634	-0.0203	0.6503	2.7468	-10.0996		36.015	-0.0357	-4.8544	1.3051	0.0497	-2.6879	-0.0445	1.2848	1.3365	-0.2097		36	0.1336	-0.1465	-4.9468	-0.0274	0.0862	-3.3502	0.3965	1.9775	-0.6634		36.016	1.9178	0.3882	1.2817	1.6738	-0.0129	-0.0397	-0.1745	2.6827	-20.7483		36.015	-0.3092	2.1357	1.2752	0.0213	4.8678
36.078	-1.7548	-0.0813	1.3831	-0.9071	0.0441	-0.0107	1.1579	2.6186	-10.9162		36.078	-0.0357	-4.7761	1.3051	0.0006	-2.5161	-0.0276	2.3	2.234	-0.4819		36.062	0.1466	-0.1465	-4.9013	0.0269	0.0985	-3.2391	1.031	1.5929	-1.2985		36.078	2.009	0.4143	1.2817	1.8322	0.0026	-0.0445	-0.5552	1.7852	-21.0205		36.078	-0.2962	2.2009	1.2752	0.0349	5.1185
36.14	-1.859	-0.0682	1.3766	-0.9824	0.0669	-0.0107	0.3965	2.875	-11.3699		36.14	-0.0357	-4.6979	1.3116	0.0567	-2.3512	-0.0034	3.1883	1.4647	0.244		36.125	0.1206	-0.1334	-4.8623	-0.0116	0.116	-3.169	0.8407	2.2981	-0.7541		36.141	2.0871	0.4273	1.2817	1.9634	-0.0438	-0.0397	-1.3166	2.1699	-21.202		36.14	-0.2701	2.2792	1.2687	0.0826	5.4551
36.203	-1.9241	-0.0943	1.3571	-0.9719	0.0494	-0.0083	1.4752	2.9392	-11.007		36.203	-0.0617	-4.6196	1.3116	-0.0064	-2.2671	-0.0203	1.9193	2.3622	0.1533		36.187	0.1206	-0.1595	-4.8233	-0.0151	0.109	-3.1327	0.1427	1.9775	-0.4819		36.203	2.1523	0.4534	1.2752	2.0315	-0.0541	-0.0227	-0.7455	1.7211	-21.4742		36.203	-0.2571	2.3574	1.2622	0.0162	5.735
36.265	-2.0153	-0.0943	1.3506	-1.0595	0.0213	-0.0131	0.5869	2.2981	-11.1884		36.265	-0.0357	-4.5544	1.3116	0.0147	-2.2355	-0.0252	1.1579	2.6186	0.6069		36.25	0.1336	-0.1726	-4.7778	0.0094	0.109	-3.024	0.3965	1.9775	-1.2985		36.266	2.2564	0.4404	1.2817	2.1014	-0.0318	-0.047	-0.809	2.8109	-21.5649		36.265	-0.2571	2.4226	1.2622	0.0673	6.0373
36.328	-2.1064	-0.0813	1.3441	-1.1314	0.0511	-0.0083	1.031	2.875	-10.9162		36.328	-0.0357	-4.4371	1.3116	0.0269	-2.1005	-0.0348	1.4752	1.5288	0.1533		36.312	0.1076	-0.1595	-4.7323	-0.0029	0.1037	-2.9297	1.4752	1.657	-1.2985		36.328	2.3085	0.4665	1.2687	2.2223	-0.0747	-0.047	-0.9993	2.875	-20.3854		36.328	-0.2441	2.4879	1.2622	0.0775	6.209
36.39	-2.1715	-0.0813	1.3116	-1.1541	0.0143	-0.0058	0.0158	3.0033	-10.9162		36.39	-0.0357	-4.3979	1.3246	0.0094	-1.9532	-0.0421	1.4117	1.8493	0.6977		36.375	0.1076	-0.1726	-4.6804	-0.0344	0.1072	-2.8693	0.46	2.0416	-0.5726		36.391	2.3867	0.4665	1.2622	2.3706	-0.0146	-0.0518	0.0793	2.6827	-21.5649		36.39	-0.2441	2.54	1.2557	0.0554	6.6572
36.453	-2.2497	-0.0552	1.3051	-1.2085	0.0125	-0.0252	0.9676	2.6827	-11.8236		36.453	-0.0357	-4.2936	1.3246	0.0287	-1.8111	-0.0421	2.9345	1.8493	0.1533		36.437	0.1206	-0.1465	-4.6674	0.0217	0.0897	-2.7944	0.7772	1.8493	-1.117		36.453	2.4648	0.4665	1.2687	2.5716	-0.0902	-0.0518	-0.3648	2.1057	-21.5649		36.453	-0.231	2.6183	1.2622	0.0656	6.9182
36.515	-2.3278	-0.0813	1.2856	-1.2891	0.016	-0.0058	0.8407	2.8109	-12.0051		36.515	-0.0487	-4.2154	1.3116	-0.0046	-1.6551	-0.0252	2.6173	1.7852	1.3328		36.5	0.1076	-0.1726	-4.6089	-0.0081	0.123	-2.7388	0.7138	2.0416	-1.48		36.516	2.543	0.4795	1.2557	2.6925	0.0008	-0.0591	0.2696	1.5929	-21.5649		36.515	-0.218	2.7096	1.2557	0.0861	7.351
36.578	-2.419	-0.0682	1.2856	-1.3925	-0.0208	-0.0155	0.5869	3.3238	-11.6421		36.578	-0.0487	-4.1241	1.3441	0.0199	-1.5499	-0.0372	3.1249	1.9134	0.244		36.562	0.1206	-0.1465	-4.5764	-0.0256	0.116	-2.6494	1.0945	2.2981	-1.0263		36.578	2.5951	0.4795	1.2492	2.8356	-0.0266	-0.0543	-0.1745	2.5545	-21.6556		36.578	-0.2441	2.7878	1.2622	0.0895	7.6155
36.64	-2.5101	-0.0552	1.2661	-1.4888	-0.0155	0.0111	1.031	3.0033	-11.1884		36.64	-0.0617	-4.0458	1.3441	0.0059	-1.5253	-0.0252	2.8076	2.1057	0.7884		36.625	0.1206	-0.1465	-4.5374	-0.0046	0.1125	-2.5818	1.031	1.2082	-0.7541		36.641	2.6732	0.4925	1.2427	2.9072	-0.1194	-0.0372	-0.3014	2.6827	-22.2908		36.64	-0.2441	2.84	1.2687	0.1116	7.7099
36.703	-2.5753	-0.0682	1.2531	-1.5449	0.002	-0.0083	0.6503	3.7726	-10.9162		36.703	-0.0487	-3.9937	1.3376	-0.0081	-1.4973	-0.0203	1.6655	1.5929	1.5143		36.687	0.1206	-0.1726	-4.4984	-0.0169	0.1177	-2.5069	0.3965	2.1057	-0.9356		36.703	2.7644	0.4795	1.2492	3.0758	-0.0936	-0.0324	-0.5552	1.7852	-22.0186		36.703	-0.218	2.853	1.2557	0.115	7.7271
36.765	-2.6534	-0.0813	1.2531	-1.6168	-0.0068	-0.0083	0.7138	3.452	-12.0958		36.765	-0.0487	-3.8893	1.3181	0.0164	-1.3991	-0.0348	1.4117	1.5929	0.7884		36.75	0.0946	-0.1465	-4.4399	-0.0221	0.1195	-2.4392	0.9676	2.1699	-1.117		36.766	2.8425	0.4925	1.2362	3.3365	-0.0335	-0.0616	-0.7455	1.4647	-21.4742		36.765	-0.218	2.853	1.2557	0.0963	6.9869
36.828	-2.7446	-0.1074	1.2401	-1.636	-0.026	0.0014	1.4752	3.0674	-12.0958		36.828	-0.0487	-3.8111	1.3246	0.0094	-1.3359	-0.0469	1.4117	1.7211	0.3347		36.812	0.1336	-0.1856	-4.4139	0.0129	0.116	-2.3836	0.9041	1.7211	-1.6614		36.828	2.9076	0.4795	1.2362	3.4949	-0.0902	-0.0518	-0.9359	2.1699	-21.3834		36.828	-0.205	2.8139	1.2687	0.1218	6.106
36.89	-2.7967	-0.0943	1.2271	-1.7131	-0.0471	-0.0107	1.6655	2.875	-12.2773		36.89	-0.0487	-3.7459	1.3506	0.0059	-1.1746	-0.0324	3.0614	1.5929	1.4235		36.875	0.1206	-0.1595	-4.3619	0.0112	0.1072	-2.3619	1.2848	2.3622	-1.2985		36.891	2.9727	0.4925	1.2297	3.6482	-0.1383	-0.0372	-0.3648	2.234	-21.5649		36.89	-0.192	2.7487	1.2687	0.0707	5.7281
36.953	-2.8748	-0.0682	1.2206	-1.7745	-0.0488	-0.001	1.4117	3.0033	-12.2773		36.953	-0.0617	-3.7198	1.3506	0.0076	-1.0501	-0.0397	3.1249	1.9134	0.8791		36.937	0.0815	-0.1595	-4.3294	0.0094	0.1125	-2.2773	0.7138	2.1699	-1.3892		36.953	3.0379	0.4925	1.2167	3.7624	-0.0507	-0.0445	-0.1745	1.7852	-21.7464		36.953	-0.192	2.6835	1.2687	0.069	5.1082
37.015	-2.9269	-0.0813	1.2141	-1.8516	-0.0383	-0.0058	1.2214	3.3238	-12.0051		37.015	-0.0617	-3.5894	1.3506	0.0059	-0.9993	-0.0542	2.8711	2.0416	0.4255		37	0.1076	-0.1856	-4.2904	0.0112	0.1037	-2.2193	0.46	1.5288	-1.8429		37.016	3.129	0.5056	1.2232	3.989	-0.1177	-0.0445	-0.7455	2.1057	-22.8352		37.015	-0.192	2.6052	1.2817	0.0503	4.5913
37.078	-2.992	-0.0943	1.2076	-1.9409	-0.0751	-0.0034	0.8407	3.1956	-12.4587		37.078	-0.0617	-3.5111	1.3701	0.0076	-0.9063	-0.0566	1.8559	1.9134	2.5123		37.062	0.1076	-0.1726	-4.2514	-0.0309	0.1212	-2.1565	-0.238	2.1057	-1.7522		37.078	3.2202	0.5317	1.2102	4.1406	-0.0369	-0.0664	-0.6186	1.9775	-21.3834		37.078	-0.192	2.527	1.2947	0.0469	4.2135
37.14	-3.0702	-0.0813	1.2012	-2.0373	-0.0839	-0.0179	1.1579	3.1315	-12.8217		37.14	-0.0617	-3.4459	1.3701	-0.0221	-0.8976	-0.0421	2.0462	2.4904	1.2421		37.125	0.1076	-0.1726	-4.2059	-0.0046	0.0879	-2.0961	0.7138	2.0416	-1.117		37.141	3.2723	0.5317	1.2037	4.3927	-0.0507	-0.0494	-0.4917	1.7211	-22.2908		37.14	-0.192	2.4748	1.3077	0.0486	3.803
37.203	-3.1613	-0.0943	1.2012	-2.1214	-0.0874	0.0014	1.6655	3.6443	-12.2773		37.203	-0.0878	-3.3286	1.3701	0.0112	-0.8502	-0.0276	1.9828	1.657	2.1494		37.187	0.0946	-0.1986	-4.1604	0.0006	0.0827	-2.026	0.5869	2.0416	-1.8429		37.203	3.3504	0.5317	1.2037	4.5801	-0.1366	-0.0324	-1.3166	1.1441	-22.563		37.203	-0.192	2.4096	1.2947	0.006	3.341
37.265	-3.2395	-0.0682	1.1817	-2.2073	-0.0857	-0.0107	0.3965	3.6443	-12.2773		37.265	-0.1008	-3.2373	1.3766	0.0094	-0.8134	-0.0421	1.5386	1.7211	1.3328		37.25	0.0815	-0.1595	-4.115	-0.0011	0.102	-2.0067	0.5234	1.9775	-1.9336		37.266	3.4155	0.5447	1.1972	4.7539	-0.0919	-0.0445	-0.3014	1.2723	-22.7444		37.265	-0.205	2.3183	1.3012	-0.0008	2.9907
37.328	-3.3176	-0.0813	1.1817	-2.2949	-0.0962	0.0062	2.1731	3.3879	-13.3661		37.328	-0.0617	-3.1851	1.3831	-0.0274	-0.7169	-0.0397	2.0462	1.8493	2.2401		37.312	0.0946	-0.1726	-4.0825	-0.0064	0.1177	-1.9414	0.3331	1.7852	-2.3873		37.328	3.4937	0.5447	1.1907	4.9958	-0.0782	-0.0348	-0.6821	1.7852	-22.4722		37.328	-0.1789	2.2662	1.3077	0.0196	2.6782
37.39	-3.4218	-0.0813	1.1752	-2.3545	-0.0716	0.0014	1.1579	3.5161	-12.368		37.39	-0.1008	-3.0938	1.3896	-0.0239	-0.6082	-0.0469	2.1097	1.9134	2.1494		37.375	0.1076	-0.2117	-4.0305	0.0182	0.1248	-1.881	1.2214	1.4006	-1.9336		37.391	3.5588	0.5577	1.1972	5.1491	-0.0988	-0.0567	-0.809	1.657	-22.3815		37.39	-0.192	2.2009	1.2882	0.0315	2.4669
37.453	-3.4739	-0.1074	1.1752	-2.4456	-0.1102	0.0135	0.7772	3.5161	-12.6402		37.453	-0.1008	-3.0025	1.3896	0.0147	-0.5065	-0.0493	2.5538	1.3365	1.8772		37.437	0.0946	-0.1986	-4.0045	-0.0134	0.1037	-1.8327	1.3483	1.7852	-2.3873		37.453	3.6369	0.5447	1.1907	5.4131	-0.073	-0.0397	-0.1745	1.5288	-22.2		37.453	-0.1789	2.1097	1.3012	-0.0315	2.2248
37.515	-3.552	-0.0682	1.1622	-2.5472	-0.1032	-0.0058	1.5386	3.3879	-12.368		37.515	-0.0748	-2.9243	1.4156	-0.0151	-0.4522	-0.0469	2.4904	1.657	2.1494		37.5	0.0815	-0.1856	-3.959	0.0024	0.116	-1.7602	0.2696	1.7211	-2.0244		37.516	3.689	0.5577	1.1907	5.6755	-0.1692	-0.0616	-0.8724	1.08	-22.4722		37.515	-0.192	2.0444	1.3077	0.0043	1.9826
37.578	-3.6432	-0.0682	1.1622	-2.6419	-0.1313	-0.0203	1.2214	3.7084	-11.9143		37.578	-0.0748	-2.8721	1.4026	0.0006	-0.4259	-0.0324	3.0614	1.8493	1.9679		37.562	0.0946	-0.1856	-3.92	-0.0046	0.102	-1.7433	0.9676	1.657	-2.5688		37.578	3.7932	0.5708	1.1712	5.8578	-0.1709	-0.0543	0.0158	1.08	-22.2		37.578	-0.1789	1.9532	1.2947	0.0043	1.78
37.64	-3.6953	-0.0943	1.1557	-2.7593	-0.133	0.0087	1.4752	3.452	-13.8197		37.64	-0.1008	-2.7808	1.4091	-0.0204	-0.4539	-0.0445	1.9193	1.4647	1.6957		37.625	0.0946	-0.1856	-3.881	-0.0116	0.0914	-1.6756	1.0945	2.2981	-2.841		37.641	3.8583	0.5447	1.1777	6.052	-0.1743	-0.064	-0.9359	1.2723	-23.1074		37.64	-0.192	1.888	1.3012	-0.0383	1.5791
37.703	-3.7734	-0.0943	1.1492	-2.8539	-0.0979	-0.0228	1.9828	4.0931	-13.4568		37.703	-0.0878	-2.7026	1.4026	0.0076	-0.4223	-0.0228	2.6807	1.8493	2.0587		37.687	0.0815	-0.1986	-3.855	-0.0134	0.0862	-1.6297	0.6503	1.9775	-1.7522		37.703	3.9104	0.5577	1.1777	6.2462	-0.2224	-0.064	-1.1262	1.3365	-22.6537		37.703	-0.192	1.8227	1.3142	-0.0008	1.4382
37.765	-3.8385	-0.0813	1.1557	-2.9555	-0.0944	0.0014	1.6021	3.8367	-12.368		37.765	-0.0748	-2.6113	1.4156	-0.0256	-0.3715	-0.0566	1.2848	1.5929	1.4235		37.75	0.0685	-0.1726	-3.803	-0.0116	0.0914	-1.5741	0.3331	1.657	-1.7522		37.766	3.9886	0.5708	1.1842	6.546	-0.1572	-0.0591	-0.809	1.0159	-22.1093		37.765	-0.192	1.7445	1.3142	-0.0025	1.3575
37.828	-3.9037	-0.0813	1.1492	-3.0379	-0.1278	-0.0034	1.5386	3.5161	-13.729		37.828	-0.0748	-2.533	1.4286	-0.0029	-0.3066	-0.0542	1.9193	1.5929	0.6069		37.812	0.0685	-0.1726	-3.751	-0.0151	0.102	-1.5548	0.5869	1.7852	-2.0244		37.828	4.0537	0.5577	1.1712	6.7879	-0.085	-0.081	-0.4917	0.9518	-22.6537		37.828	-0.192	1.6532	1.3077	-0.023	1.2236
37.89	-3.9688	-0.0813	1.1427	-3.1465	-0.0892	0.0087	1.9193	2.875	-13.3661		37.89	-0.1138	-2.4678	1.4351	-0.0344	-0.1874	-0.059	2.9345	1.7211	2.1494		37.875	0.0815	-0.1726	-3.7185	-0.0116	0.0949	-1.5016	0.46	2.0416	-2.2966		37.891	4.1449	0.5708	1.1712	6.9804	-0.1898	-0.0348	0.0793	0.7595	-22.8352		37.89	-0.205	1.588	1.3207	-0.023	1.1068
37.953	-4.0469	-0.0682	1.1557	-3.2902	-0.1172	-0.0034	0.9676	4.0931	-13.0939		37.953	-0.0878	-2.3765	1.4221	-0.0029	-0.1628	-0.0638	2.3	1.3365	1.6957		37.937	0.0815	-0.2117	-3.686	-0.0081	0.116	-1.4315	0.8407	1.657	-2.478		37.953	4.21	0.5969	1.1712	7.2547	-0.1503	-0.047	-0.3648	0.8236	-22.0186		37.953	-0.192	1.4967	1.3207	-0.0008	0.9505
38.015	-4.1251	-0.0552	1.1492	-3.4374	-0.1348	-0.0131	1.1579	4.2854	-14.1827		38.015	-0.1008	-2.2852	1.4351	-0.0169	-0.0997	-0.0493	3.1883	1.5929	1.2421		38	0.0685	-0.1856	-3.621	-0.0099	0.1353	-1.3711	1.031	1.8493	-2.3873		38.016	4.2881	0.5969	1.1712	7.483	-0.1366	-0.0494	-0.5552	1.1441	-23.2888		38.015	-0.192	1.4446	1.3142	-0.0213	0.6929
38.078	-4.2032	-0.0682	1.1492	-3.5759	-0.1225	-0.001	1.0945	4.606	-13.2753		38.078	-0.1268	-2.194	1.4351	-0.0134	-0.0611	-0.059	2.4904	1.4006	1.605		38.062	0.0685	-0.1856	-3.595	0.0006	0.1248	-1.3421	1.1579	2.1057	-2.2966		38.078	4.3532	0.5969	1.1647	7.7062	-0.2447	-0.047	-0.3014	1.1441	-23.6518		38.078	-0.192	1.3533	1.3402	-0.0281	0.5246
38.14	-4.2553	-0.0552	1.1622	-3.6109	-0.1295	-0.0083	0.9676	4.3495	-13.8197		38.14	-0.1268	-2.1288	1.4416	-0.0186	-0.0524	-0.059	2.6173	1.657	1.8772		38.125	0.0685	-0.1726	-3.5495	-0.0011	0.1195	-1.3131	0.3965	1.8493	-3.2039		38.141	4.4053	0.5969	1.1647	7.6499	-0.1881	-0.0421	0.0158	2.234	-23.3796		38.14	-0.205	1.2881	1.3402	-0.0145	0.4937
38.203	-4.3595	-0.0422	1.1427	-3.7178	-0.0962	-0.0058	1.6655	3.7726	-13.6383		38.203	-0.1399	-2.0505	1.4481	-0.0274	0.0055	-0.0348	2.4269	1.3365	1.6957		38.187	0.0685	-0.1856	-3.4846	-0.0327	0.0739	-1.2962	0.6503	1.8493	-3.1132		38.203	4.4314	0.5969	1.1647	7.3893	-0.1348	-0.0324	-0.3014	2.6827	-24.1054		38.203	-0.192	1.2098	1.3467	-0.0519	0.4765
38.265	-4.4506	-0.0422	1.1427	-3.7966	-0.1505	-0.001	1.6021	3.452	-13.8197		38.265	-0.1008	-1.9462	1.4611	-0.0362	0.0564	-0.0542	3.1249	1.657	2.1494		38.25	0.0685	-0.2117	-3.4521	0.0076	0.0827	-1.2527	0.7772	0.9518	-3.3854		38.266	4.4053	0.6099	1.1517	6.868	0.0747	-0.064	0.1427	3.9008	-22.6537		38.265	-0.192	1.1185	1.3597	0.0009	0.4851
38.328	-4.5027	-0.0552	1.1492	-3.9876	-0.1383	0.0038	1.729	3.7084	-14.0919		38.328	-0.1268	-1.9071	1.4676	-0.0327	0.0985	-0.0687	2.9345	1.3365	2.0587		38.312	0.0425	-0.1726	-3.4066	-0.0011	0.0739	-1.202	0.2696	1.3365	-2.6595		38.328	4.3532	0.5969	1.1452	6.6329	-0.0936	-0.064	-0.9993	3.7726	-22.9259		38.328	-0.1789	1.0403	1.3727	-0.0213	0.3872
38.39	-4.5809	-0.0422	1.1492	-4.0893	-0.1207	0.0038	1.4752	4.9906	-14.0012		38.39	-0.1268	-1.8288	1.4806	-0.0204	0.1353	-0.0638	3.1249	1.1441	1.605		38.375	0.0685	-0.1856	-3.3936	-0.0274	0.1177	-1.173	0.3965	1.7211	-3.2039		38.391	4.2751	0.5969	1.1387	6.2343	0.0747	-0.0688	-1.7607	1.4647	-22.2908		38.39	-0.192	0.9751	1.3792	-0.04	0.2893
38.453	-4.672	-0.0291	1.1492	-4.3118	-0.133	-0.0034	1.3483	5.1188	-14.8178		38.453	-0.1268	-1.7245	1.4871	-0.0151	0.1546	-0.0421	3.5056	1.2723	1.3328		38.437	0.0425	-0.1986	-3.3416	0.0112	0.1177	-1.1222	1.4752	1.7852	-4.6556		38.453	4.236	0.6099	1.1452	5.8425	0.1159	-0.0348	-0.3648	2.6186	-22.6537		38.453	-0.192	0.9099	1.3857	-0.0536	0.3924
38.515	-4.7111	-0.003	1.1492	-4.4695	-0.1225	0.0038	0.9676	4.9906	-14.2734		38.515	-0.1268	-1.6462	1.5066	-0.0221	0.137	-0.0469	2.2366	1.4006	1.605		38.5	0.0555	-0.2247	-3.3091	0.0041	0.1248	-1.0739	1.6021	1.4006	-3.5668		38.516	4.1318	0.5969	1.1387	5.454	0.1125	-0.0494	-1.5069	4.2854	-22.7444		38.515	-0.192	0.8968	1.3987	-0.0451	0.4594
38.578	-4.7893	-0.0291	1.1622	-4.5694	-0.0962	0.0014	1.2214	4.9906	-13.729		38.578	-0.1399	-1.568	1.5196	-0.0169	0.1212	-0.0493	2.4269	1.3365	-0.3004		38.562	0.0425	-0.2117	-3.2311	-0.0239	0.1248	-1.0401	1.031	1.9775	-4.0205		38.578	4.0797	0.6099	1.1387	5.282	0.2138	-0.0518	-0.7455	3.3879	-23.0166		38.578	-0.218	0.9229	1.3987	-0.0247	0.3907
38.64	-4.8674	-0.0422	1.1492	-4.6202	-0.1576	-0.001	1.8559	4.8624	-14.1827		38.64	-0.1268	-1.4636	1.5131	0.0024	0.1265	-0.0469	2.4269	1.5929	0.4255		38.625	0.0685	-0.2117	-3.2051	0.0234	0.1125	-1.0087	0.1427	1.5929	-4.7464		38.641	4.0146	0.5969	1.1322	4.9242	0.2103	-0.0591	-1.5069	4.029	-23.2888
38.703	-4.9586	-0.0291	1.1427	-4.7569	-0.0944	-0.0203	1.9828	3.8367	-14.1827		38.703	-0.1268	-1.3854	1.5196	-0.0134	0.1248	-0.0469	2.5538	1.4647	-0.3912		38.687	0.0294	-0.2378	-3.1726	0.0234	0.1265	-0.9869	1.031	1.5929	-4.6556		38.703	3.9495	0.6099	1.1322	4.5239	0.1743	-0.0421	-1.6973	5.1188	-22.8352
38.765	-5.0367	-0.0161	1.1557	-4.9041	-0.1225	0.0014	1.3483	4.0931	-13.8197		38.765	-0.1268	-1.3332	1.5196	-0.0169	0.2124	-0.0421	2.8711	0.6313	0.0625		38.75	0.0425	-0.2247	-3.1271	-0.0011	0.1055	-0.9289	0.7138	1.2723	-4.0205		38.766	3.8714	0.5969	1.1322	4.253	0.231	-0.0494	-1.6338	5.1829	-22.4722
38.828	-5.0758	-0.0291	1.1557	-5.0531	-0.1663	0.0038	0.9676	5.1188	-14.0919		38.828	-0.1268	-1.2289	1.5326	-0.0256	0.2668	-0.0493	2.0462	1.7211	0.9699		38.812	0.0294	-0.2247	-3.0816	0.0041	0.1212	-0.8927	1.5386	1.5929	-4.2927		38.828	3.8193	0.6099	1.1322	4.1372	0.1691	-0.0275	-1.7607	3.6443	-23.3796
38.89	-5.1669	-0.003	1.1557	-5.3282	-0.1365	-0.0034	1.4752	4.8624	-14.0919		38.89	-0.1268	-1.1507	1.5391	-0.0414	0.3176	-0.0372	3.1249	1.657	0.244		38.875	0.0555	-0.2378	-3.0426	0.0059	0.102	-0.8903	0.3965	1.4647	-4.5649		38.891	3.7411	0.5969	1.1322	3.8339	0.2619	-0.0543	-1.38	4.9265	-22.6537
38.953	-5.2581	0.01	1.1427	-5.4403	-0.0944	-0.0083	1.7924	5.5676	-14.2734		38.953	-0.1268	-1.0202	1.5456	-0.0519	0.3352	-0.0469	2.9345	1.5929	1.4235		38.937	0.0294	-0.2117	-3.0101	-0.0029	0.1212	-0.8419	0.8407	1.9134	-4.4742		38.953	3.676	0.623	1.1322	3.6806	0.176	-0.0591	-1.4435	5.1188	-23.2888
39.015	-5.3232	0.0231	1.1557	-5.5647	-0.1558	0.0062	1.1579	4.6701	-15.8159		39.015	-0.1138	-0.9811	1.5651	-0.0362	0.365	-0.0469	2.1097	1.657	2.2401		39	0.0425	-0.2378	-2.9581	-0.0064	0.1072	-0.8057	1.4117	1.8493	-4.5649		39.016	3.6109	0.6099	1.1387	3.4745	0.1846	-0.0421	-1.7607	4.4136	-22.563
39.078	-5.4014	0.01	1.1492	-5.6856	-0.1015	0.0135	1.7924	4.5419	-15.09		39.078	-0.1399	-0.8898	1.5586	-0.0449	0.3948	-0.03	3.4421	1.7211	1.9679		39.062	0.0294	-0.1986	-2.9192	-0.0204	0.0932	-0.8081	0.2696	1.7211	-4.8371		39.078	3.5328	0.6099	1.1452	3.2445	0.2378	-0.064	-1.6973	4.7342	-23.2888
39.14	-5.4795	-0.0161	1.1492	-5.8241	-0.1102	-0.0058	0.6503	3.7726	-14.4549		39.14	-0.1008	-0.8116	1.5521	-0.0256	0.3615	-0.0638	2.1097	1.4006	2.6031		39.125	0.0164	-0.2639	-2.8867	-0.0204	0.1072	-0.8008	0.5234	1.7211	-4.6556		39.141	3.4676	0.6099	1.1517	3.098	0.1726	-0.0616	-2.0145	4.9265	-22.9259
39.203	-5.5707	0.0231	1.1492	-5.9853	-0.1593	0.0111	2.1731	4.5419	-14.3641		39.203	-0.1399	-0.7985	1.5781	-0.0344	0.3738	-0.0517	2.5538	1.2082	2.966		39.187	0.0294	-0.2378	-2.8412	0.0024	0.109	-0.7622	1.6021	1.4006	-5.0186		39.203	3.3765	0.5969	1.1712	2.9327	0.2361	-0.0591	-1.6973	4.8624	-22.6537
39.265	-5.6488	-0.003	1.1557	-6.1921	-0.1207	0.0111	1.9193	4.9265	-14.9993		39.265	-0.1138	-0.6551	1.5781	-0.0274	0.4123	-0.0445	2.3	1.2082	2.2401		39.25	0.0164	-0.2247	-2.8022	-0.0169	0.1072	-0.7622	0.9676	1.7852	-5.2		39.266	3.3114	0.623	1.1712	2.6772	0.2361	-0.0591	-1.5069	5.0547	-23.1981
39.328	-5.7139	-0.003	1.1752	-6.3182	-0.1523	-0.0058	1.1579	5.6958	-14.7271		39.328	-0.1008	-0.5638	1.5846	-0.0064	0.4825	-0.0421	2.9345	1.8493	2.6031		39.312	0.0164	-0.2378	-2.7502	-0.0011	0.1265	-0.709	0.2696	1.5929	-5.2908		39.328	3.2332	0.5969	1.1907	2.4711	0.2138	-0.0518	-1.6973	6.2728	-22.7444
39.39	-5.779	0.0231	1.1752	-6.4619	-0.1207	-0.0034	1.7924	4.9265	-14.9993		39.39	-0.1138	-0.4725	1.5976	-0.0239	0.4965	-0.03	2.4269	1.3365	3.2382		39.375	0.0425	-0.2508	-2.7047	0.0006	0.1388	-0.7042	0.7772	1.5929	-4.8371		39.391	3.1551	0.6099	1.1972	2.3314	0.2584	-0.0421	-1.5704	4.606	-21.9278
39.453	-5.8572	0.0231	1.1622	-6.6319	-0.1085	-0.0155	1.729	4.7342	-15.09		39.453	-0.1268	-0.4073	1.6106	0.0112	0.5807	-0.0493	2.5538	1.08	3.0567		39.437	-0.0096	-0.2247	-2.6722	-0.0221	0.1055	-0.68	0.0793	1.0159	-5.3815		39.453	3.0769	0.6099	1.2037	2.2155	0.2413	-0.0518	-2.1414	4.9265	-23.1981
39.515	-5.9093	0.01	1.1687	-6.7511	-0.1821	-0.0058	1.5386	4.5419	-15.09		39.515	-0.1399	-0.3421	1.6106	-0.0116	0.6245	-0.0493	3.0614	1.5929	2.0587		39.5	0.0555	-0.2378	-2.6332	0.0024	0.1195	-0.6583	0.6503	0.6954	-5.2		39.516	3.0118	0.6099	1.2167	2.0844	0.2327	-0.0518	-1.6973	4.7983	-22.7444
39.578	-5.9874	0.0361	1.1752	-6.8948	-0.1505	-0.001	1.729	4.9906	-14.8178		39.578	-0.1399	-0.2247	1.6366	-0.0309	0.6403	-0.0711	2.3635	1.657	3.7826		39.562	0.0034	-0.2639	-2.5942	-0.0256	0.1055	-0.651	0.2696	1.3365	-6.0166		39.578	2.9337	0.5969	1.2232	1.8765	0.2602	-0.064	-1.5069	4.7983	-23.1074
39.64	-6.0525	0.0231	1.1817	-7.1155	-0.119	-0.0155	1.4752	5.8881	-14.9085		39.64	-0.1399	-0.1465	1.6431	-0.0029	0.6929	-0.0421	2.8711	1.657	4.4177		39.625	0.0034	-0.2378	-2.5487	-0.0134	0.1177	-0.6172	0.7138	1.9134	-5.3815		39.641	2.8555	0.5969	1.2362	1.7317	0.2516	-0.0518	-1.38	5.5676	-23.2888
39.703	-6.1176	0.0231	1.2012	-7.303	-0.1804	0.0111	0.9676	6.1446	-15.3622		39.703	-0.1138	-0.0813	1.6626	-0.0046	0.7122	-0.0493	3.1883	1.8493	3.6919		39.687	-0.0227	-0.2378	-2.5162	-0.0029	0.1248	-0.6075	0.9676	1.0159	-6.2888		39.703	2.7774	0.6099	1.2492	1.621	0.2155	-0.0591	-1.8242	5.247	-22.8352
39.765	-6.1958	0.0491	1.1882	-7.4275	-0.1576	-0.0058	1.8559	5.5035	-15.8159		39.765	-0.1138	-0.0422	1.6496	-0.0274	0.7315	-0.0542	2.6173	1.9134	3.6011		39.75	-0.0227	-0.2508	-2.4772	0.0006	0.1212	-0.581	1.0945	1.1441	-6.1074		39.766	2.7123	0.5708	1.2557	1.5051	0.2739	-0.047	-1.3166	4.8624	-22.6537
39.828	-6.2739	0.0491	1.1882	-7.5624	-0.1769	-0.0107	1.4752	5.6317	-15.5437		39.828	-0.1268	0.0491	1.6691	-0.0064	0.7665	-0.0542	3.1883	1.7211	4.1455		39.812	-0.0096	-0.2378	-2.4187	-0.0362	0.116	-0.5568	1.1579	1.08	-6.1074		39.828	2.6211	0.6099	1.2557	1.4165	0.2567	-0.0567	-1.7607	4.7983	-23.2888
39.89	-6.3781	0.0622	1.1947	-7.7061	-0.1523	-0.0107	1.7924	4.7983	-15.4529		39.89	-0.1138	0.1665	1.6951	-0.0291	0.8104	-0.0469	2.7442	1.2723	3.2382		39.875	-0.0357	-0.2378	-2.3667	-0.0134	0.1318	-0.5399	0.2696	0.9518	-6.1074		39.891	2.569	0.623	1.2752	1.3211	0.2224	-0.0421	-1.8242	5.1188	-23.0166
39.953	-6.4172	0.0491	1.1882	-7.5273	-0.0804	-0.001	1.4117	2.875	-15.5437		39.953	-0.1268	0.2317	1.6756	-0.0064	0.8542	-0.0638	2.8076	1.4647	3.2382		39.937	-0.0096	-0.2247	-2.3473	-0.0046	0.1195	-0.5133	0.3965	0.8236	-6.1981		39.953	2.4909	0.6099	1.2752	1.1661	0.2962	-0.0445	-1.0628	5.6317	-23.8332
40.015	-6.4172	0.0491	1.2012	-7.0612	-0.1172	-0.0058	1.6021	2.8109	-12.9124		40.015	-0.1268	0.2969	1.6756	0.0164	0.87	-0.0445	2.998	1.4006	3.9641		40	-0.0227	-0.2117	-2.2888	0.0024	0.13	-0.4964	0.7772	0.8236	-6.3796		40.016	2.4388	0.6099	1.2882	1.0401	0.2962	-0.0445	-0.9993	5.9522	-24.0147
40.078	-6.3781	0.0491	1.1817	-6.7002	-0.1348	0.0062	1.6021	2.4263	-11.007		40.078	-0.1399	0.3882	1.6626	-0.0256	0.9191	-0.0711	2.9345	1.4647	3.2382		40.062	-0.0357	-0.2378	-2.2628	-0.0309	0.1107	-0.4891	0.9676	0.8877	-6.1074		40.078	2.3346	0.5969	1.2882	0.9685	0.3134	-0.0518	-1.5069	5.824	-24.0147
40.14	-6.313	0.0622	1.2012	-6.4584	-0.0646	0.0111	1.2848	4.2854	-9.0108		40.14	-0.0878	0.4534	1.6821	-0.0309	0.9419	-0.0445	3.1883	1.8493	4.327		40.125	-0.0096	-0.2247	-2.2303	-0.0169	0.1037	-0.4746	0.5869	1.0159	-7.0147		40.141	2.2825	0.623	1.2947	0.8782	0.2876	-0.0567	-1.8876	5.3111	-23.561
40.203	-6.2609	0.0491	1.1882	-6.3358	-0.1488	-0.001	0.8407	5.3753	-8.1942		40.203	-0.1138	0.5447	1.6886	-0.0134	0.9594	-0.0397	2.7442	1.9134	3.5104		40.187	-0.0227	-0.2508	-2.1783	-0.0099	0.1037	-0.477	0.46	2.2981	-6.924		40.203	2.1783	0.6099	1.2882	0.7862	0.2773	-0.0372	-1.3166	5.247	-24.6498
40.265	-6.1958	0.0752	1.1882	-5.8626	-0.0997	0.0087	1.4117	3.1315	-7.4684		40.265	-0.1138	0.636	1.7016	-0.0449	1.0226	-0.0517	2.8711	1.0159	3.9641		40.25	-0.0357	-0.2378	-2.1263	-0.0151	0.0914	-0.4505	0.7772	1.2082	-7.922		40.266	2.1002	0.6099	1.3012	0.73	0.3168	-0.0324	-0.8724	5.0547	-23.2888
40.328	-6.1046	0.0622	1.1687	-5.5332	-0.0576	-0.0034	2.0462	0.6954	-6.1074		40.328	-0.1789	0.6882	1.6821	-0.0151	1.0699	-0.0445	2.9345	1.08	3.7826		40.312	-0.0227	-0.2639	-2.1003	-0.0134	0.1318	-0.4335	0.5869	1.1441	-7.1054		40.328	2.0351	0.623	1.3077	0.655	0.2825	-0.0567	-1.8242	6.1446	-23.8332
40.39	-6.0656	0.0752	1.1622	-5.2458	-0.0751	0.0111	1.2214	2.2981	-5.9259		40.39	-0.1268	0.8055	1.6951	-0.0362	1.0734	-0.0517	3.1883	1.3365	4.6899		40.375	-0.0096	-0.2508	-2.0483	-0.0081	0.102	-0.4094	1.4117	1.2082	-7.2869		40.391	1.983	0.6099	1.3142	0.5171	0.2979	-0.0543	-1.3166	6.1446	-24.4684
40.453	-5.9874	0.0622	1.1622	-4.9952	-0.0874	0.0135	1.6021	1.1441	-4.5649		40.453	-0.1399	0.8707	1.6951	-0.0572	1.1085	-0.0517	3.4421	1.3365	3.8733		40.437	-0.0096	-0.2247	-1.9898	-0.0204	0.1283	-0.3876	0.7138	0.8877	-7.2869		40.453	1.9178	0.6099	1.3142	0.4523	0.3254	-0.0251	-1.38	6.0804	-24.922
40.515	-5.8962	0.0231	1.1427	-4.9024	-0.0716	-0.0155	1.2214	2.1699	-3.5668		40.515	-0.1138	0.9359	1.7211	-0.0274	1.1488	-0.0687	2.9345	1.08	4.5085		40.5	-0.0357	-0.2378	-1.9508	-0.0169	0.1212	-0.4046	0.9041	1.2082	-7.1962		40.516	1.8006	0.5969	1.3272	0.4097	0.279	-0.0445	-1.38	6.7215	-24.8313
40.578	-5.8572	0.0622	1.1492	-4.7254	-0.0874	-0.0034	0.5869	2.9392	-2.2966		40.578	-0.1268	1.0403	1.7016	-0.0274	1.1102	-0.059	2.5538	0.9518	3.6011		40.562	-0.0487	-0.2378	-1.9248	-0.0291	0.116	-0.3611	0.5869	1.2723	-6.8332		40.578	1.7485	0.5838	1.3272	0.3365	0.3288	-0.0494	-1.4435	5.8881	-25.3757
40.64	-5.779	0.0491	1.1427	-4.5256	-0.0348	-0.001	1.031	1.7211	-2.841		40.64	-0.1268	1.1185	1.6951	-0.0204	1.1488	-0.0469	2.9345	0.8236	3.7826		40.625	-0.0617	-0.2378	-1.8728	-0.0099	0.1283	-0.3683	0.3965	0.5672	-6.924		40.641	1.6704	0.623	1.3272	0.3109	0.3409	-0.0591	-2.078	5.8881	-25.1942
40.703	-5.7139	0.0752	1.1232	-4.2628	-0.0313	0.0062	2.0462	1.5929	-2.1151		40.703	-0.1529	1.1576	1.7081	-0.0379	1.1699	-0.0445	1.9193	0.8236	4.5085		40.687	-0.0487	-0.2508	-1.8338	-0.0099	0.1072	-0.3659	0.3965	0.9518	-7.0147		40.703	1.5923	0.6099	1.3272	0.2462	0.2687	-0.0348	-1.5069	5.824	-25.8294
40.765	-5.6358	0.0622	1.1102	-4.0157	-0.0611	0.0014	1.1579	0.6954	-1.5707		40.765	-0.1529	1.2881	1.6951	-0.0607	1.2032	-0.0517	1.9828	1.0159	4.4177		40.75	-0.0487	-0.2247	-1.8078	-0.0046	0.137	-0.3151	0.9676	0.503	-7.3776		40.766	1.5141	0.6099	1.3337	0.2206	0.3151	-0.0494	-1.4435	5.6317	-25.1942
40.828	-5.5837	0.0361	1.1167	-3.7826	-0.0453	0.0087	2.1731	0.9518	-1.2985		40.828	-0.1268	1.3533	1.7081	-0.0362	1.2628	-0.0542	2.6807	1.3365	3.8733		40.812	-0.0487	-0.2378	-1.7623	-0.0151	0.13	-0.3417	0.3965	0.6954	-7.3776		40.828	1.436	0.6099	1.3272	0.1508	0.2825	-0.0591	-2.2049	6.5292	-25.3757
40.89	-5.5186	0.0752	1.1102	-3.6512	-0.0331	0.0087	1.8559	1.4006	-1.2985		40.89	-0.1399	1.4054	1.7016	-0.0274	1.3382	-0.0638	3.4421	1.08	4.0548		40.875	-0.0487	-0.2378	-1.7364	-0.0256	0.116	-0.3272	0.5234	1.08	-7.6498		40.891	1.3709	0.6099	1.3272	0.0792	0.3203	-0.0518	-1.9511	5.8881	-25.1035
40.953	-5.3883	0.0491	1.0972	-3.5198	-0.0488	-0.0058	1.9828	1.7852	-1.117		40.953	-0.1399	1.5228	1.7081	-0.0344	1.3592	-0.0493	2.6807	1.2082	4.5085		40.937	-0.0878	-0.2378	-1.6844	-0.0011	0.1195	-0.3103	1.1579	1.4647	-8.285		40.953	1.2667	0.5969	1.3337	0.0332	0.3701	-0.0543	-1.7607	5.6958	-26.1016
41.015	-5.3362	0.0491	1.0972	-3.4339	-0.0366	0.0062	1.2848	1.9775	-1.117		41.015	-0.1138	1.588	1.6951	-0.0291	1.3926	-0.0517	2.0462	1.3365	4.2363		41	-0.0617	-0.2378	-1.6324	-0.0081	0.1335	-0.3055	0.7772	1.08	-6.8332		41.016	1.2015	0.6099	1.3272	0.0094	0.3048	-0.0421	-2.2683	6.7215	-26.0108
41.078	-5.2451	0.0491	1.0972	-3.2534	-0.0559	-0.0131	1.2214	1.9134	-0.3004		41.078	-0.1529	1.6793	1.7016	-0.0432	1.4592	-0.059	2.0462	0.6954	3.4197		41.062	-0.0487	-0.2508	-1.5934	-0.0011	0.1195	-0.3055	0.1427	0.8236	-7.6498		41.078	1.1234	0.5969	1.3402	-0.0213	0.3117	-0.0372	-1.1262	6.2087	-25.7386
41.14	-5.219	0.0231	1.0842	-3.0361	-0.0348	0.0014	2.1097	0.8877	-0.6634		41.14	-0.1399	1.7054	1.6951	-0.0379	1.4645	-0.0711	2.4904	1.4006	4.5992		41.125	-0.0617	-0.2508	-1.5479	-0.0414	0.1037	-0.2571	0.5869	1.7852	-8.1942		41.141	1.0322	0.6099	1.3402	-0.0264	0.334	-0.0591	-1.6338	5.824	-25.5572
41.203	-5.1148	0.0491	1.0842	-2.9275	-0.0383	-0.0155	0.8407	0.503	-1.117		41.203	-0.0878	1.7967	1.7016	-0.0327	1.5609	-0.0614	3.3152	0.8236	4.1455		41.187	-0.0487	-0.2378	-1.5349	-0.0064	0.1248	-0.2475	0.9676	0.6313	-8.3757		41.203	0.9541	0.6099	1.3402	-0.0639	0.3203	-0.0445	-1.6973	5.7599	-26.5552
41.265	-5.0758	0.0491	1.0647	-2.775	-0.0296	-0.0083	1.3483	0.2466	-0.119		41.265	-0.1268	1.901	1.7016	-0.0256	1.6416	-0.0614	3.3152	0.8236	3.9641		41.25	-0.0748	-0.2508	-1.4829	-0.0327	0.1195	-0.2596	0.3965	0.6954	-8.285		41.266	0.876	0.5969	1.3467	-0.0945	0.3237	-0.0494	-1.9511	6.1446	-26.1923
41.328	-4.9846	0.0752	1.0582	-2.6471	-0.0068	-0.001	1.729	1.1441	0.5162		41.328	-0.1268	2.0053	1.7016	-0.0239	1.6854	-0.0517	3.7594	1.4006	3.9641		41.312	-0.0748	-0.2899	-1.4309	-0.0204	0.1037	-0.2451	1.031	0.9518	-8.3757		41.328	0.7848	0.5969	1.3402	-0.1013	0.334	-0.0324	-1.5069	5.824	-27.5533
41.39	-4.9065	0.0491	1.0517	-2.5455	0.0038	-0.001	1.9828	1.5288	0.3347		41.39	-0.1268	2.0444	1.7016	-0.0379	1.7135	-0.059	2.8076	1.4647	4.9621		41.375	-0.0487	-0.2508	-1.3984	-0.0064	0.1177	-0.2451	0.46	0.6313	-8.7386		41.391	0.6936	0.6099	1.3597	-0.1354	0.3168	-0.0543	-2.078	6.5292	-27.3718
41.453	-4.8283	0.0622	1.0777	-2.4719	-0.0173	-0.0034	1.0945	1.2723	0.3347		41.453	-0.1268	2.1618	1.7016	-0.0607	1.8029	-0.0638	2.998	1.0159	4.327		41.437	-0.0878	-0.2769	-1.3529	0.0024	0.116	-0.2402	0.2062	0.7595	-9.3738		41.453	0.6155	0.5969	1.3532	-0.1746	0.3185	-0.0543	-2.078	6.7856	-27.1904
41.515	-4.7632	0.0752	1.0582	-2.3089	0.0055	-0.0083	1.031	1.7211	0.4255		41.515	-0.1138	2.214	1.7081	-0.0642	1.8204	-0.0759	2.9345	1.08	4.8714		41.5	-0.1008	-0.2639	-1.3074	-0.0116	0.1125	-0.233	0.6503	0.6954	-9.3738		41.516	0.5374	0.5838	1.3727	-0.1899	0.3409	-0.047	-1.6973	7.0421	-27.5533
41.578	-4.7111	0.0622	1.0582	-2.1687	0.009	-0.001	0.1427	0.9518	0.4255		41.578	-0.1008	2.3053	1.7081	-0.0291	1.9011	-0.0421	2.8711	0.6313	4.4177		41.562	-0.0878	-0.2247	-1.2619	-0.0134	0.1283	-0.2161	0.9041	0.9518	-8.9201		41.578	0.4592	0.5969	1.3727	-0.1814	0.3323	-0.0397	-1.5069	6.4651	-27.644
41.64	-4.5939	0.0491	1.0647	-2.0513	0.0353	0.0014	1.6655	0.8236	0.3347		41.64	-0.1529	2.3705	1.7081	-0.0414	1.9695	-0.0687	3.1883	1.3365	4.5992		41.625	-0.0748	-0.2508	-1.2229	-0.0291	0.13	-0.233	0.2696	0.4389	-8.8294		41.641	0.3811	0.5708	1.3792	-0.207	0.3237	-0.0567	-2.3952	6.4651	-27.3718
41.703	-4.5548	0.0491	1.0582	-1.9129	0.0371	-0.0058	1.6655	0.6954	0.5162		41.703	-0.1138	2.4487	1.6951	-0.0659	2.0712	-0.0493	3.569	1.3365	4.5992		41.687	-0.1008	-0.2769	-1.1904	-0.0186	0.116	-0.2064	0.7138	0.6313	-8.7386		41.703	0.3029	0.5838	1.3792	-0.1814	0.3323	-0.047	-1.6338	5.824	-28.6421
41.765	-4.4506	0.0491	1.0582	-1.8358	0.0336	-0.0034	1.2848	1.3365	0.6977		41.765	-0.1008	2.5531	1.7081	-0.0484	2.1659	-0.0469	3.9497	1.08	4.4177		41.75	-0.1138	-0.2769	-1.145	-0.0081	0.1265	-0.1774	0.9676	0.6313	-8.9201		41.766	0.2118	0.5838	1.3792	-0.2223	0.3185	-0.03	-2.2049	6.1446	-27.9162
41.828	-4.3985	0.0231	1.0387	-1.7972	0.0406	-0.0107	1.2214	1.2723	0.6069		41.828	-0.1138	2.5922	1.7081	-0.0572	2.357	-0.0493	3.8228	1.2082	3.7826		41.812	-0.0748	-0.2899	-1.1125	0.0006	0.1283	-0.1919	0.9676	0.6313	-9.283		41.828	0.1336	0.5708	1.3857	-0.2053	0.3185	-0.0591	-1.9511	6.2728	-28.3699
41.89	-4.3204	0.0361	1.0517	-1.7061	0.0616	-0.001	1.2214	1.657	0.5162		41.89	-0.1268	2.7356	1.7276	-0.0467	2.378	-0.0542	3.6325	0.6313	3.7826		41.875	-0.1008	-0.2899	-1.0605	-0.0029	0.1177	-0.1992	1.0945	0.3748	-9.1923		41.891	0.0034	0.5577	1.3792	-0.2359	0.3014	-0.0397	-1.3166	6.6574	-29.368
41.953	-4.2553	0.0231	1.0582	-1.58	0.009	-0.0058	1.4752	1.2723	0.5162		41.953	-0.1399	2.8139	1.7146	-0.0519	2.4289	-0.0687	3.3787	0.8877	4.5992		41.937	-0.1008	-0.2769	-1.015	-0.0274	0.1353	-0.1653	1.2848	1.3365	-9.1016		41.953	-0.0227	0.5577	1.3987	-0.2853	0.3271	-0.0227	-2.078	6.2728	-29.1865
42.015	-4.1771	0.0491	1.0647	-1.4608	0.0476	0.0135	1.9193	1.2082	0.0625		42.015	-0.1268	2.866	1.7276	-0.0379	2.5096	-0.0542	4.267	0.2466	4.7807		42	-0.1008	-0.2639	-0.9695	0.0112	0.1353	-0.1605	0.5869	1.0159	-9.3738		42.016	-0.1138	0.5577	1.4052	-0.3092	0.31	-0.0591	-2.2049	6.9138	-29.7309
42.078	-4.1251	0.0491	1.0387	-1.3206	0.0757	-0.001	1.3483	0.7595	0.244		42.078	-0.1268	2.9573	1.7081	-0.0624	2.5622	-0.0445	3.8228	0.8236	4.6899		42.062	-0.0878	-0.2639	-0.937	-0.0379	0.1072	-0.1677	0.9676	0.8877	-9.283		42.078	-0.192	0.5447	1.4052	-0.3381	0.3014	-0.0591	-1.9511	7.1703	-30.2753
42.14	-4.0469	0.0231	1.0387	-1.2383	0.0529	-0.0203	0.9676	0.1184	1.5143		42.14	-0.1268	3.0095	1.7211	-0.0362	2.6796	-0.0711	3.3152	0.3107	4.6899		42.125	-0.1008	-0.2639	-0.8915	0.0094	0.13	-0.1484	0.5234	0.3107	-9.283		42.141	-0.2831	0.5186	1.4182	-0.3313	0.3151	-0.0664	-1.9511	6.7856	-30.2753
42.203	-3.9558	0.0361	1.0257	-1.1682	0.0634	-0.0083	0.7138	0.6313	0.6069		42.203	-0.1138	3.0878	1.7146	-0.0449	2.7761	-0.0638	3.3152	0.6954	4.5085		42.187	-0.1008	-0.2378	-0.8525	0.0129	0.13	-0.1412	0.2062	0.7595	-10.0089		42.203	-0.3613	0.5317	1.4182	-0.3313	0.3254	-0.0567	-1.9511	6.7856	-30.6383
42.265	-3.8906	0.0231	1.0322	-1.1664	0.0757	-0.001	1.4117	0.3107	0.3347		42.265	-0.1268	3.153	1.7276	-0.0502	2.8971	-0.0614	4.2035	0.6954	4.4177		42.25	-0.1138	-0.2639	-0.807	-0.0081	0.1195	-0.1436	0.9041	0.5672	-10.5533		42.266	-0.4394	0.5447	1.4117	-0.2853	0.3306	-0.0397	-1.7607	6.2087	-30.2753
42.328	-3.8385	0.0231	1.0322	-1.1191	0.0669	-0.0179	0.7772	1.3365	1.7865		42.328	-0.1138	3.2703	1.7211	-0.0572	2.9918	-0.0421	4.0132	0.7595	4.9621		42.312	-0.1008	-0.2769	-0.768	-0.0099	0.1177	-0.1436	0.2062	0.6313	-10.4626		42.328	-0.5176	0.5447	1.4117	-0.2956	0.3168	-0.0616	-1.7607	5.6958	-30.0031
42.39	-3.7344	-0.003	1.0387	-1.0508	0.0827	-0.0131	1.729	1.2723	1.2421		42.39	-0.1529	3.3225	1.7341	-0.0519	3.0707	-0.0493	3.8863	0.3748	4.2363		42.375	-0.1138	-0.2508	-0.7225	-0.0221	0.116	-0.1363	0.2696	0.5672	-9.9182		42.391	-0.6087	0.5317	1.4052	-0.316	0.2962	-0.0372	-1.3166	6.1446	-31.0012
42.453	-3.6562	0.0231	1.0322	-0.9649	0.0704	-0.0155	0.46	0.7595	0.9699		42.453	-0.1138	3.3877	1.7276	-0.0659	3.225	-0.0566	3.8863	0.7595	5.3251		42.437	-0.0357	-0.2508	-0.7095	-0.0151	0.116	-0.1315	0.9676	0.7595	-10.4626		42.453	-0.6738	0.5447	1.4117	-0.3892	0.3323	-0.0421	-1.38	6.3369	-29.9124
42.515	-3.6171	0.01	1.0517	-0.8335	0.0581	-0.0155	0.3331	0.3748	0.7884		42.515	-0.1659	3.479	1.7406	-0.0624	3.2916	-0.0638	3.3152	1.2082	4.6899		42.5	-0.1268	-0.2378	-0.6705	-0.0046	0.123	-0.1291	1.2848	0.8236	-10.0996		42.516	-0.739	0.5447	1.4182	-0.4318	0.3374	-0.0372	-1.38	7.1062	-30.8197
42.578	-3.539	-0.003	1.0257	-0.7371	0.0862	-0.0107	0.9041	-0.2021	1.605		42.578	-0.0748	3.5572	1.7341	-0.0747	3.4161	-0.059	3.2518	0.6313	4.5992		42.562	-0.1399	-0.2769	-0.6185	-0.0221	0.1125	-0.1267	1.2848	0.8236	-10.3718		42.578	-0.8301	0.5577	1.4247	-0.4523	0.3271	-0.0445	-1.8242	7.1703	-30.729
42.64	-3.4348	0.01	1.0387	-0.674	0.0879	-0.0131	0.0158	0.1825	1.1513		42.64	-0.1008	3.6355	1.7276	-0.073	3.5056	-0.0638	3.5056	0.8877	4.6899		42.625	-0.1399	-0.2508	-0.5666	-0.0011	0.102	-0.1146	1.2848	1.08	-9.9182		42.641	-0.9083	0.5577	1.4312	-0.4557	0.3134	-0.0518	-1.3166	7.4267	-30.729
42.703	-3.3697	-0.0161	1.0322	-0.6425	0.0949	-0.0252	1.6021	0.1184	1.605		42.703	-0.0878	3.7398	1.7341	-0.0414	3.6774	-0.0662	3.7594	1.2723	4.6899		42.687	-0.1529	-0.2378	-0.5276	-0.0029	0.1072	-0.1412	0.2696	0.3107	-10.2811		42.703	-0.9864	0.5577	1.4312	-0.4335	0.3082	-0.0591	-1.8242	6.0163	-31.2734
42.765	-3.2525	-0.0161	1.0322	-0.6512	0.1072	-0.0203	1.1579	1.4647	1.1513		42.765	-0.0748	3.7789	1.7406	-0.0379	3.8668	-0.0469	3.6325	1.2723	5.688		42.75	-0.1268	-0.2639	-0.4951	-0.0186	0.109	-0.0952	-0.0476	0.503	-9.7367		42.766	-1.0776	0.5317	1.4312	-0.4233	0.2911	-0.0421	-1.1262	6.2087	-31.2734
42.828	-3.1743	-0.0291	1.0322	-0.6372	0.0967	-0.0493	0.7772	0.8236	1.8772		42.828	-0.0227	3.8833	1.7406	-0.0414	3.986	-0.0759	3.2518	1.1441	4.327		42.812	-0.1399	-0.2769	-0.4496	-0.0221	0.102	-0.1073	0.2696	0.6954	-10.0996		42.828	-1.1557	0.5577	1.4182	-0.4983	0.3048	-0.0494	-1.38	6.5933	-30.729
42.89	-3.1092	-0.0291	1.0387	-0.5741	0.0897	0.0014	1.031	0.5672	1.605		42.89	-0.0357	3.9094	1.7406	-0.0449	4.1018	-0.0614	3.4421	0.5672	4.7807		42.875	-0.1659	-0.2639	-0.4106	-0.0151	0.1265	-0.0542	1.1579	0.8236	-9.7367		42.891	-1.2338	0.5186	1.4247	-0.546	0.3117	-0.0591	-1.6338	7.4908	-31.9085
42.953	-3.0311	-0.0291	1.0452	-0.4602	0.1125	-0.0179	0.2062	0.2466	1.7865		42.953	-0.0487	4.0006	1.7406	-0.0397	4.1877	-0.0614	2.2366	0.8877	4.1455		42.937	-0.1268	-0.2378	-0.3716	-0.0116	0.116	-0.1049	0.5869	0.503	-9.3738		42.953	-1.312	0.5317	1.4247	-0.5954	0.279	-0.0445	-2.078	7.1703	-30.6383
43.015	-2.9529	-0.0422	1.0647	-0.3726	0.102	-0.0203	-0.1745	0.1184	1.1513		43.015	-0.0487	4.1311	1.7601	-0.0414	4.3332	-0.0759	3.5056	0.3748	5.1436		43	-0.1268	-0.2378	-0.3391	-0.0011	0.1265	-0.0952	0.3331	0.3748	-9.7367		43.016	-1.4162	0.5447	1.4247	-0.6652	0.2773	-0.0397	-1.9511	7.1703	-31.2734
43.078	-2.8878	-0.0291	1.0452	-0.3148	0.1142	-0.0107	0.9676	-0.3945	1.4235		43.078	0.0294	4.1963	1.7406	-0.0537	4.4086	-0.0759	2.8076	0.5672	4.2363		43.062	-0.1529	-0.2508	-0.2936	0.0024	0.1195	-0.0662	1.4117	0.6954	-9.7367		43.078	-1.4813	0.5447	1.4182	-0.6737	0.2962	-0.0421	-1.9511	7.1703	-31.0012
43.14	-2.8097	-0.0291	1.0517	-0.292	0.1265	-0.0228	0.2696	0.5672	1.7865		43.14	-0.0227	4.2484	1.7471	-0.0712	4.4858	-0.0421	2.8711	1.0159	5.0529		43.125	-0.1399	-0.2639	-0.2416	-0.0151	0.109	-0.0832	0.9041	0.5672	-9.5552		43.141	-1.5594	0.5447	1.4247	-0.6823	0.2567	-0.0567	-2.1414	7.1062	-31.2734
43.203	-2.7315	-0.0422	1.0582	-0.2815	0.109	-0.0203	0.0158	0.1825	1.6957		43.203	0.0034	4.3397	1.7601	-0.0642	4.7453	-0.0783	3.8228	0.8236	4.6899		43.187	-0.1399	-0.2508	-0.1766	-0.0239	0.1002	-0.0832	0.7772	1.2082	-9.646		43.203	-1.6376	0.5447	1.4247	-0.6823	0.267	-0.0591	-1.9511	6.3369	-31.2734
43.265	-2.6794	-0.0682	1.0712	-0.2815	0.13	-0.0469	0.3965	0.3107	2.0587		43.265	-0.0096	4.444	1.7471	-0.0677	4.9522	-0.0735	4.5842	0.5672	4.5085		43.25	-0.1399	-0.2639	-0.1506	-0.0204	0.1037	-0.0687	1.1579	0.9518	-9.5552		43.266	-1.7157	0.5447	1.4117	-0.7163	0.2945	-0.0421	-1.6338	5.9522	-31.7271
43.328	-2.5492	-0.0552	1.0907	-0.2587	0.1037	-0.0203	0.5869	0.1184	2.6031		43.328	-0.0096	4.5092	1.7406	-0.0659	5.0346	-0.0832	3.3152	0.1825	5.0529		43.312	-0.1399	-0.2769	-0.1311	-0.0169	0.1037	-0.0542	0.8407	0.6313	-9.3738		43.328	-1.7939	0.5447	1.4182	-0.7947	0.2533	-0.0445	-2.2049	6.0163	-31.4549
43.39	-2.4841	-0.0682	1.1102	-0.1956	0.1212	-0.0034	0.6503	0.5672	1.6957		43.39	-0.0096	4.5614	1.7406	-0.08	5.1784	-0.0566	3.4421	0.9518	5.0529		43.375	-0.1529	-0.2769	-0.0726	-0.0362	0.102	-0.0614	0.2696	0.6954	-9.1923		43.391	-1.872	0.5317	1.4182	-0.8611	0.2825	-0.0543	-1.8876	7.2344	-32.09
43.453	-2.406	-0.0682	1.1167	-0.1711	0.1248	-0.0179	-0.0476	0.2466	3.2382		43.453	-0.0096	4.6527	1.7471	-0.0537	5.2714	-0.0445	3.6959	0.9518	4.4177		43.437	-0.1529	-0.2769	-0.0336	0.0059	0.0985	-0.0711	0.9041	1.2082	-10.3718		43.453	-1.9501	0.5447	1.4182	-0.9736	0.2619	-0.0372	-1.1897	7.9396	-31.9085
43.515	-2.3408	-0.0813	1.1102	-0.1325	0.1195	-0.0131	0.46	-0.0098	1.7865		43.515	-0.0096	4.7309	1.7471	-0.0835	5.466	-0.0662	3.1883	0.6954	5.1436		43.5	-0.1659	-0.2639	0.0184	-0.0221	0.109	-0.0638	0.8407	0.6313	-9.8274		43.516	-2.0283	0.5447	1.4117	-1.04	0.2533	-0.0445	-1.6973	7.1703	-31.4549
43.578	-2.2627	-0.0813	1.1232	-0.0852	0.116	-0.0228	0.0158	-0.3304	1.8772		43.578	0.0034	4.7831	1.7601	-0.0502	5.5975	-0.0904	2.998	0.503	4.4177		43.562	-0.1659	-0.2769	0.0378	-0.0081	0.1055	-0.0445	0.7138	0.7595	-9.1923		43.578	-2.1064	0.5577	1.4052	-1.0707	0.2911	-0.0397	-1.8242	7.2985	-32.3622
43.64	-2.1715	-0.0682	1.1297	-0.0922	0.1195	-0.0252	0.1427	-0.0739	1.5143		43.64	0.0034	4.8353	1.7406	-0.0642	5.7308	-0.0832	3.3152	0.5672	4.5992		43.625	-0.1659	-0.2378	0.0833	-0.0291	0.1055	-0.0638	0.2062	0.7595	-9.646		43.641	-2.2106	0.5317	1.4052	-1.1576	0.2756	-0.0348	-1.1897	7.2985	-32.4529
43.703	-2.0673	-0.0682	1.1492	-0.0975	0.1283	-0.001	0.46	0.1184	1.9679		43.703	0.0034	4.9527	1.7276	-0.0642	5.9272	-0.0832	3.3152	0.5672	5.0529		43.687	-0.1659	-0.2639	0.1288	-0.0309	0.1142	-0.0469	0.5234	1.3365	-9.646		43.703	-2.2757	0.5447	1.4052	-1.2172	0.3082	-0.0372	-1.4435	6.6574	-32.1807
43.765	-2.0543	-0.0682	1.1427	-0.0817	0.116	-0.0348	0.5869	0.2466	1.7865		43.765	0.0164	5.0309	1.7471	-0.0537	6.0569	-0.0856	3.3152	0.4389	4.327		43.75	-0.1659	-0.2639	0.1548	-0.0116	0.102	-0.0445	1.729	0.6313	-9.283		43.766	-2.3408	0.5447	1.3987	-1.2887	0.2945	-0.047	-1.9511	7.0421	-32.5437
43.828	-2.0022	-0.0422	1.1622	-0.087	0.1002	-0.0348	0.0793	-0.0098	1.7865		43.828	0.0034	5.0961	1.7601	-0.0502	6.3095	-0.0614	4.267	0.8877	5.2343		43.812	-0.1529	-0.2899	0.2133	-0.0134	0.0792	-0.0348	0.7138	1.0159	-10.1904		43.828	-2.419	0.5447	1.3922	-1.4216	0.2979	-0.0227	-1.5704	7.2985	-32.1807
43.89	-1.9632	-0.0682	1.1752	-0.0572	0.1265	-0.0083	1.031	0.6954	2.5123		43.89	0.0034	5.2135	1.7471	-0.0677	6.4287	-0.0928	3.3787	0.8877	5.3251		43.875	-0.1529	-0.2639	0.2523	-0.0029	0.1002	-0.0276	1.7924	0.9518	-10.2811		43.891	-2.4841	0.5447	1.4052	-1.5102	0.3323	-0.0372	-2.0145	7.8755	-32.8159
43.953	-1.9111	-0.0813	1.1752	-0.0624	0.0862	-0.03	0.0158	0.8236	2.4216		43.953	0.0164	5.2787	1.7471	-0.0607	6.5374	-0.0735	4.1401	0.503	5.1436		43.937	-0.1789	-0.2508	0.2848	0.0076	0.1072	-0.0228	1.6655	0.9518	-10.0996		43.953	-2.5492	0.5447	1.3987	-1.5852	0.322	-0.0372	-1.7607	7.8755	-32.5437
44.015	-1.885	-0.0813	1.1687	-0.0624	0.0967	-0.03	0.5869	0.3748	1.7865		44.015	0.0425	5.3439	1.7666	-0.0432	6.7794	-0.0759	3.569	0.9518	5.1436		44	-0.1659	-0.2639	0.3433	-0.0221	0.0985	-0.0252	1.2214	1.4006	-9.8274		44.016	-2.6274	0.5447	1.3857	-1.7266	0.3718	-0.0275	-1.7607	8.0037	-32.9066
44.078	-1.8459	-0.0813	1.1752	-0.0607	0.0985	-0.0155	0.7138	0.8877	1.3328		44.078	0.0425	5.4613	1.7601	-0.0782	6.9442	-0.0832	3.569	0.4389	5.5973		44.062	-0.1659	-0.2639	0.3693	-0.0151	0.0879	-0.0397	0.8407	1.2723	-10.2811		44.078	-2.7185	0.5317	1.3987	-1.7674	0.3718	-0.0372	-2.078	7.4267	-33.0881
44.14	-1.8069	-0.0682	1.1752	-0.0467	0.0914	-0.0203	0.5234	0.1825	1.4235		44.14	0.0164	5.5004	1.7536	-0.0432	7.1126	-0.0856	4.1401	0.503	4.2363		44.125	-0.1529	-0.2769	0.4083	-0.0274	0.1002	-0.0445	1.2848	1.2082	-9.5552		44.141	-2.7967	0.5577	1.3857	-1.8731	0.4027	-0.0324	-2.1414	6.978	-32.9066
44.203	-1.8069	-0.0552	1.1817	-0.0362	0.123	-0.0131	0.7138	1.1441	1.7865		44.203	0.0164	5.5917	1.7601	-0.0659	7.2371	-0.0614	3.5056	0.503	5.5065		44.187	-0.1659	-0.2769	0.4733	0.0112	0.0897	-0.0445	0.9041	1.3365	-10.0996		44.203	-2.8488	0.5577	1.3792	-2.0383	0.3941	-0.0324	-1.8242	7.5549	-33.9954
44.265	-1.7808	-0.0682	1.1947	-0.0572	0.109	-0.0179	0.46	0.6313	1.5143		44.265	0.0034	5.6569	1.7731	-0.0624	7.4545	-0.0783	3.2518	0.1184	4.5085		44.25	-0.1659	-0.2769	0.4928	-0.0029	0.0932	-0.0252	1.6021	1.1441	-9.7367		44.266	-2.9399	0.5447	1.3792	-2.1303	0.3598	-0.0421	-1.8876	7.1062	-33.9047
44.328	-1.7808	-0.0682	1.1882	-0.0887	0.13	-0.0252	0.5234	0.9518	2.1494		44.328	0.0294	5.7482	1.7926	-0.0747	7.6737	-0.0735	4.0766	1.08	4.5992		44.312	-0.1659	-0.2639	0.5513	-0.0134	0.0897	-0.0397	0.7138	1.5288	-9.3738		44.328	-2.992	0.5447	1.3792	-2.2427	0.3975	-0.0348	-2.649	7.2344	-33.5417
44.39	-1.7808	-0.0943	1.1947	-0.0975	0.1458	-0.0276	0.3965	0.1825	1.605		44.39	0.0425	5.7873	1.7666	-0.073	7.7982	-0.0807	4.0132	0.1184	4.7807		44.375	-0.1659	-0.2639	0.5968	-0.0099	0.0862	-0.0542	0.7772	1.4647	-9.3738		44.391	-3.0832	0.5186	1.3792	-2.4216	0.389	-0.0445	-2.9663	7.2985	-32.6344
44.453	-1.7939	-0.0552	1.1947	-0.087	0.1353	-0.0203	0.3965	0.3107	1.7865		44.453	0.0034	5.8525	1.7731	-0.0712	7.6281	-0.0638	3.6325	0.503	4.2363		44.437	-0.1789	-0.2378	0.6422	0.0304	0.0844	-0.0276	1.6655	1.3365	-9.4645		44.453	-3.1353	0.5056	1.3857	-2.5255	0.3426	-0.0372	-3.2835	7.8755	-33.3603
44.515	-1.7808	-0.0813	1.1882	-0.0344	0.0897	-0.03	0.2062	1.0159	1.0606		44.515	0.0425	5.8655	1.7731	-0.0519	7.2511	-0.0711	0.9676	0.503	4.5085		44.5	-0.1399	-0.2769	0.6682	0.0129	0.0739	-0.0324	1.1579	1.4647	-9.0108		44.516	-3.2134	0.5056	1.3792	-2.7283	0.3443	-0.0397	-2.5221	8.3883	-33.9047
44.578	-1.7808	-0.0813	1.1947	-0.0432	0.13	-0.0058	1.031	0.5672	1.3328		44.578	-0.0357	5.8134	1.7731	-0.0274	6.718	-0.0807	0.9676	-0.0098	5.0529		44.562	-0.1529	-0.2769	0.7137	-0.0081	0.0739	-0.0252	0.6503	1.3365	-9.4645		44.578	-3.2525	0.4665	1.3662	-2.839	0.4216	-0.0421	-1.8242	8.196	-33.3603
44.64	-1.7418	-0.0552	1.1882	-0.0327	0.109	-0.0083	0.7772	0.8236	0.9699		44.64	0.0425	5.7612	1.7796	-0.0362	6.1622	-0.0759	1.2214	0.6313	4.5992		44.625	-0.1399	-0.2639	0.7397	0.0024	0.0704	0.0038	0.9041	0.9518	-9.8274		44.641	-3.3567	0.4665	1.3857	-2.9412	0.4181	-0.0397	-2.7125	8.3242	-33.9047
44.703	-1.7418	-0.0682	1.1947	-0.0169	0.1037	-0.0228	0.5234	0.5672	1.0606		44.703	0.0425	5.6699	1.7861	-0.087	5.8483	-0.0735	2.3635	1.2723	6.4139		44.687	-0.1659	-0.2899	0.7852	-0.0029	0.0721	-0.0131	0.8407	0.7595	-9.3738		44.703	-3.4088	0.4534	1.3792	-3.1252	0.3769	-0.0616	-2.8394	8.196	-33.1788
44.765	-1.6897	-0.0682	1.2076	0.1829	0.1388	-0.0203	0.5869	-0.9073	2.5123		44.765	0.0294	5.6047	1.7731	-0.0467	5.5484	-0.0735	2.1731	1.08	6.1417		44.75	-0.1529	-0.2508	0.8372	0.0234	0.0704	-0.001	1.7924	1.08	-10.1904		44.766	-3.4739	0.4665	1.3857	-3.2734	0.4096	-0.047	-2.4587	7.8114	-34.3583
44.828	-1.6376	-0.0813	1.2012	0.1198	0.1142	-0.0228	0.7138	-1.292	2.2401		44.828	0.0294	5.5395	1.7796	-0.0747	5.1346	-0.0783	0.1427	0.5672	5.688		44.812	-0.1789	-0.2639	0.8762	0.0006	0.0616	0.0038	1.1579	0.9518	-10.2811		44.828	-3.539	0.4273	1.3857	-3.4165	0.3752	-0.03	-1.9511	8.0678	-34.0861
44.89	-1.5464	-0.0813	1.1947	0.2057	0.137	-0.0034	1.2848	-0.9714	3.2382		44.89	0.0425	5.4743	1.7926	-0.0642	4.9347	-0.0856	0.8407	0.6313	4.9621		44.875	-0.1529	-0.2769	0.9087	-0.0116	0.0529	-0.0058	0.8407	0.8877	-9.8274		44.891	-3.6302	0.4143	1.3792	-3.5153	0.413	-0.0324	-2.649	7.3626	-33.9954
44.953	-1.4552	-0.1074	1.2012	0.0234	0.102	-0.0397	0.9676	1.0159	3.1475		44.953	0.0685	5.383	1.8055	-0.0274	4.4525	-0.0832	-0.1111	0.4389	5.3251		44.937	-0.192	-0.2508	0.9477	-0.0029	0.0546	0.0159	0.7772	0.5672	-10.0996		44.953	-3.6823	0.4013	1.3792	-3.6874	0.4284	-0.0445	-2.5221	7.7473	-33.1788
45.015	-1.3641	-0.0682	1.2206	0.0199	0.137	-0.0107	0.7138	0.3748	2.4216		45.015	0.0685	5.3439	1.7796	-0.0414	4.1368	-0.0904	-0.3014	0.7595	4.8714		45	-0.1789	-0.2769	0.9932	-0.0169	0.0581	0.0207	0.5234	1.2082	-10.9162		45.016	-3.7604	0.4013	1.3857	-3.8458	0.3615	-0.047	-3.347	8.5807	-34.7213
45.078	-1.2469	-0.0682	1.2596	0.0182	0.1248	-0.0058	0.7138	0.503	3.1475		45.078	0.0685	5.2656	1.7731	-0.0467	4.0123	-0.0662	1.7924	1.4647	4.327		45.062	-0.218	-0.2639	1.0322	-0.0046	0.0599	0.0352	1.3483	1.657	-10.0089		45.078	-3.8125	0.3752	1.3922	-3.9889	0.4233	-0.03	-1.5069	8.5166	-34.0861
45.14	-1.1817	-0.0682	1.2596	0.0462	0.1142	-0.0179	0.7772	0.8236	2.966		45.14	0.0685	5.1483	1.799	-0.0169	3.8984	-0.0759	2.0462	0.9518	5.4158		45.125	-0.205	-0.2508	1.0712	0.0006	0.0651	0.0449	1.1579	1.3365	-10.0089		45.141	-3.8906	0.3621	1.3922	-4.1354	0.3821	-0.0324	-2.7125	8.5807	-34.3583
45.203	-1.1427	-0.0682	1.2661	0.1338	0.1283	-0.0131	-0.1745	0.3748	2.5123		45.203	0.0685	5.0831	1.7926	-0.0327	3.6827	-0.0614	2.2366	0.2466	5.0529		45.187	-0.205	-0.2639	1.1102	-0.0116	0.0494	0.0377	1.031	1.2082	-9.8274		45.203	-3.9427	0.3621	1.3922	-4.3296	0.3958	-0.0494	-3.6008	8.5807	-35.1749
45.265	-1.0645	-0.0813	1.2791	0.2495	0.1388	0.0135	1.4117	-0.5868	2.6031		45.265	0.0815	4.9918	1.7926	-0.0291	3.4582	-0.0687	0.7138	0.6313	4.2363		45.25	-0.1659	-0.2769	1.1492	0.0006	0.0546	0.0546	0.7138	0.7595	-10.4626		45.266	-3.9948	0.3621	1.3922	-4.4676	0.4319	-0.0494	-3.0297	8.2601	-34.0861
45.328	-0.9734	-0.1074	1.2661	0.2775	0.1423	0.0038	1.3483	-1.0355	3.6919		45.328	0.0555	4.9527	1.7861	-0.0572	3.1566	-0.0638	0.0158	1.08	4.327		45.312	-0.218	-0.2769	1.2012	-0.0046	0.0458	0.0425	1.1579	0.6954	-10.3718		45.328	-4.086	0.336	1.3922	-4.609	0.4164	-0.0348	-3.1566	8.3883	-34.6305
45.39	-0.8952	-0.0813	1.2466	0.2197	0.123	-0.0155	0.9676	-0.7791	3.3289		45.39	0.0815	4.8744	1.7796	-0.0099	2.9269	-0.0735	-0.6821	0.8877	4.327		45.375	-0.2441	-0.2639	1.2596	0.0059	0.0529	0.0691	1.3483	0.8877	-10.3718		45.391	-4.1511	0.336	1.3922	-4.7777	0.4697	-0.03	-3.0297	8.3883	-34.2676
45.453	-0.778	-0.0943	1.2531	0.1601	0.1055	-0.0276	0.2696	0.9518	3.4197		45.453	0.0815	4.7701	1.7861	-0.0414	2.8638	-0.0687	-0.1745	1.5288	4.327		45.437	-0.205	-0.2508	1.2856	0.0129	0.0564	0.0667	0.8407	0.6313	-10.9162		45.453	-4.2292	0.323	1.3987	-4.9531	0.437	-0.0397	-3.1566	8.9012	-34.1769
45.515	-0.6999	-0.0943	1.2726	0.1373	0.1107	-0.0058	0.6503	1.08	2.8753		45.515	0.0555	4.6918	1.7926	-0.0467	2.7603	-0.0397	0.3965	1.3365	4.7807		45.5	-0.205	-0.2899	1.3246	0.0182	0.0546	0.0667	1.4752	1.5288	-10.7348		45.516	-4.2944	0.323	1.3922	-5.1661	0.4491	-0.0275	-2.7759	8.5166	-34.9027
45.578	-0.6348	-0.0943	1.2986	0.1636	0.1265	0.0038	0.7138	0.7595	3.4197		45.578	0.0555	4.6136	1.799	-0.0204	2.7656	-0.0832	0.7772	1.08	4.5085		45.562	-0.205	-0.2639	1.3766	0.0147	0.0441	0.0497	0.5234	0.8236	-10.2811		45.578	-4.3465	0.2839	1.3857	-5.3433	0.4697	-0.0348	-2.7125	8.8371	-34.7213
45.64	-0.5696	-0.0943	1.2986	0.2109	0.1388	-0.0034	0.3331	0.3748	2.966		45.64	0.0946	4.5353	1.7926	-0.0449	2.5727	-0.0662	1.4752	1.5288	4.5992		45.625	-0.231	-0.2508	1.4286	-0.0169	0.0476	0.0739	0.9676	1.4006	-9.9182		45.641	-4.4246	0.2708	1.3987	-5.5221	0.4783	-0.0397	-2.1414	9.2858	-35.3564
45.703	-0.4915	-0.0943	1.2921	0.3038	0.1195	0.0111	1.1579	-0.4586	2.4216		45.703	0.0946	4.4962	1.7861	-0.0502	2.4797	-0.059	0.5869	1.1441	3.9641		45.687	-0.218	-0.2769	1.4546	0.0129	0.0283	0.0594	0.0158	0.4389	-10.4626		45.703	-4.4897	0.2708	1.3987	-5.6635	0.4456	-0.0372	-2.7125	8.5807	-34.7213
45.765	-0.4134	-0.0943	1.2921	0.3231	0.1248	-0.0107	0.7772	-0.5868	3.3289		45.765	0.0815	4.3919	1.7861	-0.0221	2.2343	-0.0735	-0.6821	0.8877	3.7826		45.75	-0.205	-0.2378	1.4871	0.0217	0.0266	0.0763	0.5234	0.4389	-10.0996		45.766	-4.5548	0.2448	1.3987	-5.7743	0.4989	-0.0348	-2.2049	9.2217	-34.3583
45.828	-0.3482	-0.0813	1.2921	0.3161	0.1072	0.0014	0.9041	-0.5868	2.4216		45.828	0.1076	4.3006	1.7796	-0.0327	2.0834	-0.059	-0.4283	1.1441	3.4197		45.812	-0.218	-0.303	1.5326	0.0059	0.0178	0.0932	0.5869	1.2723	-9.646		45.828	-4.6069	0.2187	1.3857	-5.977	0.4353	-0.0421	-2.7125	9.2217	-35.4471
45.89	-0.2571	-0.0943	1.2921	0.2775	0.1248	0.0038	0.7138	-0.0098	3.1475		45.89	0.1336	4.2354	1.7796	-0.0397	1.88	-0.0711	-1.0628	0.8877	2.7845		45.875	-0.2441	-0.2769	1.5716	0.0076	0.016	0.0884	1.1579	1.08	-10.1904		45.891	-4.672	0.2056	1.4052	-6.2342	0.4542	-0.0275	-2.7759	8.773	-36.173
45.953	-0.1529	-0.0813	1.2791	0.2442	0.1195	-0.0131	0.2696	0.5672	4.0548		45.953	0.0946	4.1571	1.7601	-0.0204	1.8643	-0.0542	-0.809	1.1441	2.2401		45.937	-0.218	-0.2639	1.6171	-0.0081	0.0388	0.1126	1.031	0.6954	-9.9182		45.953	-4.7502	0.1795	1.3987	-6.4301	0.5281	-0.0348	-2.5221	9.4141	-35.4471
46.015	-0.0878	-0.0943	1.2986	0.2547	0.1125	-0.0034	0.2062	0.6313	3.2382		46.015	0.0685	4.0658	1.7796	-0.0397	1.8274	-0.0638	0.1427	1.2082	2.6031		46	-0.218	-0.2769	1.6561	0.0094	0.0248	0.1126	0.7772	0.3107	-10.5533		46.016	-4.8413	0.1795	1.3987	-6.6073	0.4834	-0.0397	-3.347	9.6064	-36.3545
46.078	0.0034	-0.0813	1.3051	0.3003	0.1335	-0.0131	1.031	0.5672	3.4197		46.078	0.0815	3.9485	1.7861	-0.0274	1.8046	-0.0711	0.8407	0.8877	2.8753		46.062	-0.192	-0.2247	1.6821	-0.0064	0.0195	0.1271	0.7138	0.8877	-9.646		46.078	-4.8934	0.1535	1.3987	-6.7879	0.5315	-0.0421	-2.8394	9.2217	-35.8101
46.14	0.0815	-0.1074	1.2921	0.3423	0.1265	-0.001	1.3483	-0.0098	4.1455		46.14	0.0946	3.9224	1.7666	-0.0362	1.7152	-0.0566	-0.0476	0.7595	3.1475		46.125	-0.2571	-0.2508	1.7536	0.0112	0.023	0.1102	0.3331	0.2466	-10.4626		46.141	-4.9846	0.1274	1.3987	-7.0025	0.5658	-0.0324	-2.5221	8.6448	-36.173
46.203	0.1597	-0.1074	1.2856	0.3826	0.1248	0.0183	1.1579	-0.3304	3.6919		46.203	0.1076	3.8311	1.7731	-0.0589	1.6293	-0.0711	0.7772	0.9518	2.5123		46.187	-0.231	-0.2247	1.7666	0.0006	0.0301	0.1343	1.1579	0.9518	-10.0996		46.203	-5.0627	0.1274	1.3987	-7.1848	0.4576	-0.0397	-2.9028	8.5166	-36.8989
46.265	0.2639	-0.1204	1.3051	0.4072	0.1072	0.0014	0.5234	-0.2021	3.4197		46.265	0.0815	3.792	1.7861	-0.0204	1.4504	-0.0445	-0.3648	1.2082	2.1494		46.25	-0.231	-0.2769	1.799	-0.0081	0.0248	0.1198	0.3331	1.4006	-10.5533		46.266	-5.1539	0.1013	1.4052	-7.3756	0.5298	-0.0445	-2.7125	9.35	-35.8101
46.328	0.316	-0.1204	1.3051	0.3564	0.0774	-0.0107	0.46	0.2466	4.1455		46.328	0.0815	3.6616	1.7731	-0.0327	1.3014	-0.0493	-0.9993	1.08	2.1494		46.312	-0.2441	-0.2508	1.838	0.0182	0.0195	0.1416	0.6503	0.3107	-9.7367		46.328	-5.219	0.0883	1.4052	-7.638	0.4989	-0.0324	-3.0297	10.1834	-36.2637
46.39	0.4201	-0.1074	1.3051	0.3826	0.0967	-0.0179	0.7772	0.8236	3.7826		46.39	0.0815	3.5833	1.7536	-0.0344	1.2645	-0.0445	-0.1111	1.8493	1.5143		46.375	-0.2831	-0.2899	1.89	0.0112	0.0195	0.1271	0.3331	0.8877	-9.1923		46.391	-5.2841	0.0752	1.3987	-7.8049	0.5229	-0.0421	-2.8394	9.8628	-35.9008
46.453	0.4853	-0.0943	1.3116	0.3791	0.1037	-0.0131	0.0793	0.7595	3.6011		46.453	0.0815	3.5181	1.7666	-0.0239	1.2681	-0.0348	1.2848	0.6954	1.1513		46.437	-0.2441	-0.2899	1.9225	0.0041	0.023	0.1561	0.3331	1.1441	-9.1923		46.453	-5.2972	0.0622	1.3987	-7.5767	0.5092	-0.03	-2.3952	7.7473	-35.3564
46.515	0.5894	-0.1074	1.3116	0.43	0.0844	-0.0058	0.5869	-0.3945	3.2382		46.515	0.0815	3.4529	1.7731	-0.0256	1.2523	-0.059	1.5386	1.08	0.3347		46.5	-0.2701	-0.2639	1.968	-0.0134	0.0266	0.173	0.7772	0.9518	-9.1923		46.516	-5.3232	0.0622	1.3987	-7.2087	0.4645	-0.0421	-2.7759	6.8497	-34.9935
46.578	0.6415	-0.0813	1.3181	0.5071	0.0599	-0.0107	1.031	-0.715	2.966		46.578	0.0815	3.3486	1.7601	-0.0186	1.119	-0.0662	-0.0476	1.0159	0.8791		46.562	-0.2571	-0.2899	1.994	-0.0116	0.0213	0.173	0.2696	0.6954	-9.4645		46.578	-5.2581	0.0491	1.3987	-6.9787	0.3666	-0.0372	-2.8394	7.1703	-32.4529
46.64	0.7327	-0.1074	1.3246	0.4913	0.0686	-0.0058	1.2848	-0.3304	3.5104		46.64	0.0685	3.3225	1.7666	-0.0327	1.0804	-0.0517	0.0793	0.7595	0.4255		46.625	-0.2571	-0.2899	2.059	-0.0046	0.0318	0.1826	1.1579	0.6954	-9.646		46.641	-5.2321	0.0491	1.3922	-6.5102	0.2962	-0.0348	-2.3318	7.0421	-30.1846
46.703	0.8108	-0.0813	1.3116	0.5211	0.0564	-0.0155	1.0945	-0.5227	2.966		46.703	0.0946	3.179	1.7731	-0.0099	0.9559	-0.0542	-0.238	1.08	0.5162		46.687	-0.2571	-0.2378	2.098	-0.0029	0.023	0.1657	0.5234	1.08	-9.4645		46.703	-5.1409	0.0622	1.4052	-6.2223	0.346	-0.0445	-1.8876	7.8755	-29.0051
46.765	0.889	-0.0813	1.3116	0.5123	0.0651	-0.0131	0.2696	0.1825	4.5085		46.765	0.0946	3.1138	1.7536	-0.0379	0.9033	-0.0445	0.0158	1.4647	0.1533		46.75	-0.2701	-0.2639	2.137	0.0094	0.0038	0.1826	0.8407	0.2466	-9.283		46.766	-5.0888	0.0622	1.4052	-6.0468	0.279	-0.0348	-1.7607	8.2601	-28.4606
46.828	0.9801	-0.0943	1.3116	0.5526	0.0458	-0.0083	0.1427	0.4389	3.8733		46.828	0.0555	3.0225	1.7601	0.0076	0.8823	-0.0517	-0.3014	1.9134	-0.2097		46.812	-0.2571	-0.2769	2.176	0.0041	0.016	0.1947	0.5234	0.8236	-8.8294		46.828	-5.0237	0.0622	1.4052	-5.5392	0.2653	-0.0397	-1.1262	4.6701	-27.644
46.89	1.0583	-0.0813	1.3116	0.5824	0.0336	-0.0131	0.6503	-0.0739	3.1475		46.89	0.1076	2.9704	1.7471	-0.0291	0.9051	-0.0517	0.9676	1.1441	-0.3912		46.875	-0.2701	-0.2508	2.2085	0.0006	0.0266	0.2092	0.0793	1.0159	-8.9201		46.891	-4.9586	0.0622	1.4052	-5.3927	0.2481	-0.0445	-1.7607	5.4394	-27.644
46.953	1.1234	-0.0813	1.3181	0.6104	0.0195	-0.03	0.6503	-0.5868	3.3289		46.953	0.0815	2.8921	1.7601	-0.0239	0.8577	-0.0421	1.2214	1.4006	-0.6634		46.937	-0.2701	-0.2508	2.2605	-0.0116	-0.0068	0.202	0.5869	0.7595	-8.7386		46.953	-4.8934	0.0491	1.3987	-5.2036	0.2224	-0.0421	-2.1414	6.4651	-26.4645
47.015	1.2276	-0.1204	1.3116	0.6753	0.0213	-0.0203	0.7138	-0.9073	3.4197		47.015	0.0946	2.8269	1.7731	-0.0274	0.7911	-0.0493	0.5234	0.9518	-1.6614		47	-0.2831	-0.2769	2.2865	0.0059	0.0213	0.2213	0.46	0.503	-9.7367		47.016	-4.8283	0.0622	1.4052	-4.8271	0.2138	-0.0324	-0.9993	5.5676	-25.7386
47.078	1.3057	-0.0943	1.3116	0.6858	0.0108	-0.0276	0.3965	0.3107	4.1455		47.078	0.0815	2.7617	1.7471	-0.0221	0.7192	-0.0735	-0.1745	1.2723	-2.1151		47.062	-0.2962	-0.2508	2.345	-0.0134	0.0125	0.2334	0.6503	0.4389	-8.8294		47.078	-4.7502	0.0361	1.4117	-4.5289	0.2224	-0.0275	-0.3648	5.0547	-26.7367
47.14	1.3578	-0.0943	1.3116	0.6805	0.0195	-0.0252	0.9676	0.503	4.1455		47.14	0.0815	2.6183	1.7536	-0.0116	0.6911	-0.059	0.1427	1.5929	-1.8429		47.125	-0.2571	-0.2769	2.384	0.0024	0.0213	0.26	1.0945	0.2466	-8.8294		47.141	-4.6981	0.0622	1.4052	-4.3705	0.1829	-0.0494	-0.9993	5.3111	-26.3738
47.203	1.475	-0.0943	1.3116	0.6788	0.0108	-0.0179	0.8407	0.3748	4.0548		47.203	0.0946	2.5531	1.7406	-0.0186	0.642	-0.0445	0.2062	1.1441	-2.3873		47.187	-0.2701	-0.2769	2.4164	-0.0134	-0.0015	0.2503	0.46	0.6313	-9.1923		47.203	-4.633	0.0752	1.4052	-4.1082	0.1932	-0.0567	-1.1897	4.606	-25.7386
47.265	1.5271	-0.0943	1.3116	0.7156	0.002	-0.0083	1.2214	0.3748	3.2382		47.265	0.0946	2.5009	1.7341	-0.0186	0.628	-0.059	-0.0476	0.8877	-3.2039		47.25	-0.3222	-0.2639	2.4684	-0.0064	0.016	0.2479	0.5869	0.5672	-9.0108		47.266	-4.5939	0.0883	1.4052	-3.9003	0.176	-0.0421	-0.8724	4.6701	-26.0108
47.328	1.6183	-0.0943	1.3311	0.8137	-0.019	-0.0155	0.7772	-0.2021	2.966		47.328	0.1076	2.3966	1.7341	-0.0432	0.6	-0.0421	0.0158	0.9518	-3.4761		47.312	-0.2962	-0.2769	2.5204	-0.0099	-0.0015	0.2745	0.46	0.3748	-8.9201		47.328	-4.4767	0.0883	1.4052	-3.7334	0.1863	-0.0445	-1.2531	4.7983	-25.5572
47.39	1.6964	-0.0943	1.3181	0.8838	-0.005	-0.0155	0.5234	-0.5868	4.5085		47.39	0.1336	2.2922	1.7406	-0.0134	0.5772	-0.0252	0.3331	0.6313	-4.1112		47.375	-0.3092	-0.2639	2.5529	-0.0134	0.016	0.3059	1.4117	0.9518	-8.6479		47.391	-4.4116	0.1013	1.4052	-3.5545	0.1812	-0.0348	-0.8724	5.1829	-25.6479
47.453	1.7485	-0.0943	1.3246	0.9592	-0.0278	-0.0058	1.031	-0.715	2.8753		47.453	0.1336	2.214	1.7406	-0.0011	0.5719	-0.0276	0.9676	0.503	-4.202		47.437	-0.3352	-0.2639	2.5984	-0.0274	0.0055	0.3035	0.7772	0.9518	-9.1016		47.453	-4.3465	0.1274	1.3987	-3.345	0.2103	-0.03	-1.0628	4.4777	-25.7386
47.515	1.8397	-0.1074	1.3181	0.9574	-0.0296	-0.0179	1.4117	-0.2021	3.3289		47.515	0.0685	2.1879	1.7406	-0.0327	0.5193	-0.0445	0.5869	1.7852	-4.0205		47.5	-0.2962	-0.2639	2.6309	-0.0186	-0.0138	0.2986	0.2062	0.3748	-8.3757		47.516	-4.2944	0.1143	1.4052	-3.1695	0.1571	-0.0421	-0.9359	4.7342	-25.7386
47.578	1.8918	-0.0943	1.3246	0.9872	-0.0453	-0.0155	1.7924	-0.3304	2.966		47.578	0.1206	2.0836	1.7341	-0.0309	0.4439	-0.0566	-0.1111	1.08	-4.202		47.562	-0.2962	-0.2639	2.6699	-0.0099	0.023	0.3228	0.9676	1.0159	-7.922		47.578	-4.2553	0.1404	1.3922	-2.9548	0.1502	-0.0445	-1.6973	4.2213	-25.0128
47.64	2.022	-0.0943	1.3246	1.0468	-0.0138	-0.0058	1.9828	0.3748	3.6011		47.64	0.1076	1.9923	1.7211	-0.0256	0.4001	-0.0324	0.2062	0.8877	-4.6556		47.625	-0.2831	-0.2508	2.7154	-0.0256	0.0213	0.3035	0.2062	0.1184	-8.3757		47.641	-4.1641	0.1535	1.3987	-2.7674	0.1331	-0.0421	-1.38	4.5419	-25.3757
47.703	2.0741	-0.1074	1.3181	1.0503	-0.0418	-0.0155	1.0945	0.7595	3.9641		47.703	0.1076	1.9271	1.7276	-0.0309	0.3808	-0.0517	0.2696	1.4647	-4.202		47.687	-0.2701	-0.2378	2.7674	-0.0046	0.0003	0.3252	0.6503	0.9518	-8.1035		47.703	-4.099	0.1535	1.3922	-2.6278	0.1331	-0.047	-1.1897	4.4777	-23.924
47.765	2.1913	-0.0682	1.3311	1.1274	-0.0524	-0.0397	1.6655	0.3107	3.1475		47.765	0.0946	1.7967	1.7211	-0.0397	0.3439	-0.0614	-0.5552	1.1441	-5.4722		47.75	-0.3222	-0.2639	2.7869	-0.0099	0.0336	0.3494	0.0793	0.3748	-7.8313		47.766	-4.0339	0.1535	1.3922	-2.4932	0.1245	-0.03	-0.8724	4.1572	-25.1942
47.828	2.2695	-0.0682	1.3246	1.2062	-0.0401	-0.0203	1.6655	-0.4586	3.8733		47.828	0.0946	1.7315	1.6951	-0.0397	0.358	-0.0372	0.6503	1.5929	-5.9259		47.812	-0.3222	-0.303	2.8194	-0.0204	0.009	0.3349	0.46	0.7595	-8.1035		47.828	-3.9558	0.1795	1.3922	-2.3092	0.1073	-0.0494	-1.3166	4.606	-24.1962
47.89	2.3476	-0.0552	1.3181	1.2658	-0.026	-0.0203	2.4269	0.3107	3.5104		47.89	0.1336	1.6793	1.7081	-0.0204	0.3317	-0.0469	0.5869	0.6313	-6.561		47.875	-0.3092	-0.2508	2.8779	-0.0186	0.0143	0.3711	0.9676	1.0159	-8.0128		47.891	-3.9427	0.1795	1.3857	-2.207	0.1314	-0.0348	-0.9359	4.606	-25.285
47.953	2.4127	-0.0552	1.3246	1.3219	-0.0366	-0.03	1.1579	-0.0739	3.6919		47.953	0.0815	1.575	1.7016	-0.0134	0.2756	-0.0493	0.8407	0.503	-6.924		47.937	-0.3222	-0.2378	2.9169	-0.0221	0.0038	0.3663	0.5869	0.8877	-8.1035		47.953	-3.8385	0.1926	1.3857	-2.0281	0.0815	-0.0397	-1.1262	4.4136	-24.8313
48.015	2.5039	-0.0161	1.3246	1.3604	-0.0436	-0.0348	1.729	-0.2663	3.6919		48.015	0.1336	1.5098	1.7081	-0.0116	0.2352	-0.0397	0.3965	1.5929	-6.7425		48	-0.3222	-0.2378	2.9494	-0.0064	0.0301	0.3639	-0.0476	0.8877	-7.922		48.016	-3.7864	0.2056	1.3857	-1.9054	0.1296	-0.0372	-0.7455	3.5161	-24.6498
48.078	2.582	-0.0422	1.3311	1.385	-0.0506	-0.0324	1.7924	0.1825	4.0548		48.078	0.1076	1.4185	1.6951	-0.0169	0.2054	-0.0421	-0.4283	1.5288	-7.3776		48.062	-0.3222	-0.2508	2.9819	-0.0291	0.0038	0.405	0.46	0.8877	-7.6498		48.078	-3.7213	0.2056	1.3792	-1.7657	0.1434	-0.0348	-1.8876	3.7726	-24.6498
48.14	2.6732	-0.0422	1.3311	1.413	-0.026	-0.0083	1.6021	0.503	3.7826		48.14	0.1076	1.3272	1.6886	-0.0081	0.1616	-0.0372	-0.7455	1.5929	-7.1962		48.125	-0.3482	-0.2508	3.0143	0.0094	0.0353	0.434	1.0945	0.6313	-8.4664		48.141	-3.6692	0.2056	1.3792	-1.6686	0.1039	-0.0421	-1.5069	4.5419	-24.0147
48.203	2.7513	-0.0161	1.3441	1.4656	-0.0506	-0.0155	1.5386	0.3107	4.1455		48.203	0.1206	1.275	1.6886	-0.0064	0.1458	-0.0324	-0.6186	1.7211	-7.1054		48.187	-0.3352	-0.2508	3.0793	-0.0011	0.0178	0.4388	1.031	0.9518	-8.4664		48.203	-3.5781	0.2187	1.3792	-1.563	0.1245	-0.03	-0.6186	4.5419	-24.0147
48.265	2.8425	-0.0161	1.3246	1.5725	-0.0418	-0.0155	2.2366	0.3748	3.0567		48.265	0.1076	1.1837	1.6756	-0.0186	0.1125	-0.0372	-0.3014	1.7852	-9.0108		48.25	-0.3092	-0.2769	3.1053	-0.0256	0.0073	0.4315	1.2214	1.0159	-8.1035		48.266	-3.4999	0.2187	1.3727	-1.4387	0.109	-0.0445	-1.6338	4.6701	-23.1981
48.328	2.9337	-0.0422	1.3376	1.6426	-0.0278	-0.03	1.9828	-0.6509	3.7826		48.328	0.1206	1.1055	1.6756	-0.0169	0.023	-0.0445	-0.1745	2.0416	-9.4645		48.312	-0.3482	-0.2639	3.1703	-0.0327	0.0318	0.4678	0.9041	0.8236	-7.4684		48.328	-3.4218	0.2317	1.3662	-1.3671	0.1228	-0.0275	-0.8724	4.2854	-23.7425
48.39	2.9597	-0.003	1.3376	1.7407	-0.0453	-0.0203	2.3	-0.8432	2.6031		48.39	0.1206	1.0403	1.6626	-0.0116	-0.0033	-0.03	-0.809	0.8877	-9.8274		48.375	-0.3873	-0.2508	3.2028	-0.0116	0.0283	0.4654	0.2062	0.503	-7.5591		48.391	-3.3697	0.2317	1.3597	-1.2359	0.1142	-0.0348	-0.9993	4.029	-23.6518
48.453	3.0509	0.01	1.3246	1.8458	-0.0594	-0.0034	1.9828	-0.5227	3.7826		48.453	0.0946	0.9359	1.6431	-0.0029	-0.026	-0.0397	-0.3648	0.6954	-9.8274		48.437	-0.3613	-0.2508	3.2418	-0.0449	0.009	0.504	0.7772	0.8236	-7.5591		48.453	-3.2916	0.2448	1.3597	-1.132	0.0953	-0.0494	-1.5069	4.2854	-23.924
48.515	3.116	-0.0161	1.3181	1.8686	-0.0927	-0.0131	2.5538	-1.0997	3.2382		48.515	0.1336	0.8577	1.6366	-0.0291	-0.0068	-0.0397	-0.6186	2.234	-9.8274		48.5	-0.3482	-0.2508	3.2743	-0.0344	0.009	0.5113	0.7772	0.6954	-8.0128		48.516	-3.2264	0.2578	1.3597	-1.0349	0.0901	-0.0494	-1.6338	3.7726	-23.561
48.578	3.2202	0.01	1.3311	1.9405	-0.0874	-0.0203	2.3	0.4389	2.8753		48.578	0.1466	0.7794	1.6366	-0.0239	-0.0085	-0.0493	0.3331	1.5288	-9.646		48.562	-0.3352	-0.2769	3.3393	-0.0379	0.023	0.5161	0.9041	1.2082	-7.3776		48.578	-3.1353	0.2448	1.3597	-0.948	0.1022	-0.047	-0.8724	4.4136	-23.8332
48.64	3.3244	-0.003	1.3051	1.9755	-0.0804	0.0087	2.4904	0.503	2.966		48.64	0.1206	0.7273	1.6366	-0.0011	-0.0138	-0.0517	0.2696	1.2082	-10.0089		48.625	-0.3222	-0.2508	3.3783	-0.0081	0.0143	0.5258	0.2062	0.503	-7.6498		48.641	-3.0702	0.2578	1.3532	-0.856	0.0884	-0.0445	-1.5704	4.606	-22.9259
48.703	3.3765	0.0361	1.3181	2.0947	-0.0839	-0.0252	1.8559	0.1184	3.3289		48.703	0.1206	0.623	1.6236	0.0112	-0.0401	-0.059	-0.1745	1.2723	-10.0089		48.687	-0.3352	-0.2508	3.4043	-0.0274	0.0195	0.5475	0.7772	0.9518	-8.0128		48.703	-3.005	0.2578	1.3597	-0.7691	0.0798	-0.0518	-1.6973	3.5802	-23.7425
48.765	3.4546	0.0491	1.3311	2.2436	-0.0822	-0.0203	1.6021	-0.7791	3.6919		48.765	0.1076	0.5447	1.6431	-0.0186	-0.0383	-0.0517	0.0158	1.4647	-10.1904		48.75	-0.3352	-0.2769	3.4498	-0.0081	0.0213	0.5693	1.031	0.6954	-6.7425		48.766	-2.9269	0.2578	1.3597	-0.655	0.085	-0.047	-1.2531	3.0033	-23.8332
48.828	3.5328	0.0361	1.3376	2.3715	-0.0664	-0.0228	2.1097	-1.0355	3.2382		48.828	0.1206	0.4534	1.6366	-0.0362	-0.0874	-0.0493	0.0793	1.5288	-10.1904		48.812	-0.3482	-0.2639	3.4823	-0.0099	0.002	0.5693	0.3965	0.6954	-6.924		48.828	-2.8618	0.2578	1.3532	-0.546	0.0712	-0.0616	-1.8242	3.0674	-22.8352
48.89	3.6239	0.0752	1.3246	2.4662	-0.0804	-0.0252	2.1731	-1.6125	2.1494		48.89	0.0946	0.3621	1.6171	-0.0256	-0.1856	-0.0493	-0.7455	1.5929	-10.3718		48.875	-0.3222	-0.2639	3.5278	-0.0467	0.0143	0.6055	0.6503	0.6954	-6.6518		48.891	-2.8097	0.2578	1.3532	-0.4983	0.1056	-0.0616	-1.38	3.2597	-22.8352
48.953	3.689	0.0622	1.3376	2.4872	-0.0629	-0.0131	2.8076	-0.715	3.0567		48.953	0.1336	0.2969	1.6236	-0.0327	-0.2347	-0.0372	-0.7455	0.8236	-10.9162		48.937	-0.3743	-0.2508	3.5733	-0.0274	0.002	0.6224	0.3965	0.5672	-6.924		48.953	-2.7055	0.2448	1.3467	-0.4284	0.0798	-0.0372	-1.8242	2.9392	-22.8352
49.015	3.7542	0.0883	1.3246	2.5468	-0.0664	-0.03	1.729	0.1184	3.1475		49.015	0.1206	0.2317	1.5976	-0.0081	-0.2663	-0.0421	-1.0628	1.2723	-10.0996		49	-0.3222	-0.2769	3.5862	-0.0221	0.0073	0.6176	0.3331	0.7595	-6.2888		49.016	-2.6274	0.2448	1.3467	-0.4233	0.1125	-0.0348	-1.9511	3.9649	-22.563
49.078	3.8453	0.0883	1.3311	2.6449	-0.0488	-0.0131	2.8076	0.5672	2.966		49.078	0.1076	0.1535	1.6041	-0.0116	-0.2838	-0.0566	-1.1262	0.8236	-10.1904		49.062	-0.3873	-0.2639	3.6447	-0.0256	0.0143	0.6563	0.2062	0.6313	-6.561		49.078	-2.5492	0.2708	1.3467	-0.3722	0.1468	-0.0518	-1.7607	4.1572	-22.8352
49.14	3.9365	0.0622	1.3181	2.7676	-0.0524	-0.001	2.4904	0.8877	2.2401		49.14	0.0946	0.0361	1.5911	-0.0221	-0.2838	-0.0445	-1.2531	1.3365	-10.1904		49.125	-0.3613	-0.2639	3.6902	-0.0046	0.0108	0.6659	0.9041	0.9518	-6.2888		49.141	-2.4711	0.2578	1.3402	-0.3211	0.1228	-0.0397	-1.38	4.1572	-23.2888
49.203	3.9886	0.0883	1.3311	2.9498	-0.0874	-0.0421	2.1097	-1.292	2.3309		49.203	0.1336	-0.003	1.5846	-0.0239	-0.2715	-0.0348	-0.3014	1.2723	-10.9162		49.187	-0.3482	-0.2639	3.7227	-0.0081	0.0038	0.6877	1.031	0.5672	-7.0147		49.203	-2.406	0.2578	1.3337	-0.2308	0.097	-0.047	-1.8876	3.1315	-22.4722
49.265	4.0667	0.1013	1.3311	3.0304	-0.0769	-0.0155	3.1883	-1.4843	1.9679		49.265	0.1206	-0.0943	1.5911	-0.0256	-0.2172	-0.0276	-0.9359	1.657	-8.7386		49.25	-0.3743	-0.2378	3.7747	-0.0362	0.0108	0.6853	0.2696	0.4389	-5.8352		49.266	-2.3408	0.2578	1.3337	-0.1661	0.1417	-0.0372	-1.38	2.7468	-23.1074
49.328	4.1709	0.1143	1.3311	3.1496	-0.0699	-0.0034	2.1097	-1.1638	2.0587		49.328	0.0946	-0.1465	1.5846	-0.0484	-0.1909	-0.0348	-0.7455	1.9775	-8.6479		49.312	-0.3482	-0.2639	3.8072	-0.0081	0.0178	0.7481	1.0945	0.7595	-6.8332		49.328	-2.2497	0.2448	1.3402	-0.1439	0.0953	-0.03	-1.6338	2.6186	-22.1093
49.39	4.236	0.1274	1.3311	3.1969	-0.0646	-0.0034	2.4269	-0.715	3.0567		49.39	0.1076	-0.2639	1.5911	-0.0116	-0.1926	-0.059	-0.6821	1.4006	-7.7406		49.375	-0.3613	-0.2639	3.8397	-0.0414	0.002	0.7771	1.2214	0.7595	-6.1074		49.391	-2.1715	0.2448	1.3337	-0.1167	0.1537	-0.047	-1.8876	2.7468	-22.3815
49.453	4.3011	0.1143	1.3311	3.2862	-0.0664	-0.0179	2.7442	-0.138	2.1494		49.453	0.1336	-0.3421	1.5781	0.0129	-0.1996	-0.0276	-0.7455	1.8493	-8.1035		49.437	-0.3613	-0.2508	3.8787	-0.0362	0.0178	0.7529	0.0793	0.7595	-6.7425		49.453	-2.0934	0.2578	1.3272	-0.103	0.1502	-0.0518	-2.078	2.9392	-22.4722
49.515	4.4053	0.1274	1.3246	3.3949	-0.0769	-0.0107	2.7442	-0.138	2.1494		49.515	0.1206	-0.4203	1.5781	0.0024	-0.3259	-0.059	-0.6186	1.2082	-8.1035		49.5	-0.3743	-0.2247	3.9177	-0.0274	0.009	0.7771	0.0793	0.7595	-5.2		49.516	-2.0153	0.2578	1.3272	-0.0911	0.1279	-0.0421	-1.6973	3.8367	-22.4722
49.578	4.4704	0.1535	1.3246	3.486	-0.0488	-0.0155	2.4904	-0.138	2.0587		49.578	0.1076	-0.5116	1.5781	0.0076	-0.4118	-0.0324	-0.4917	0.9518	-8.1942		49.562	-0.3743	-0.2378	3.9632	-0.0537	0.0073	0.8206	0.7138	0.8877	-6.3796		49.578	-1.9241	0.2708	1.3272	-0.069	0.164	-0.0348	-1.8242	4.0931	-22.2908
49.64	4.5356	0.1665	1.3311	3.684	-0.0716	-0.001	2.4269	-0.8432	2.3309		49.64	0.1076	-0.5899	1.5716	0.0059	-0.4206	-0.0445	-0.5552	1.5288	-8.285		49.625	-0.3613	-0.2117	4.0022	-0.0397	0.0003	0.8303	0.3965	0.5672	-5.8352		49.641	-1.859	0.2708	1.3207	-0.0111	0.1708	-0.0348	-1.5069	3.2597	-23.1074
49.703	4.6397	0.1665	1.3181	3.7962	-0.0822	-0.0228	1.8559	-0.7791	1.9679		49.703	0.1206	-0.6812	1.5716	0.0182	-0.496	-0.0348	-0.238	1.5288	-9.1923		49.687	-0.3482	-0.2508	4.0412	-0.0537	0.0353	0.8689	0.9676	1.0159	-6.3796		49.703	-1.7678	0.2578	1.3207	0.0213	0.176	-0.0421	-1.4435	3.0674	-22.0186
49.765	4.7049	0.1795	1.3181	3.9066	-0.0524	-0.0179	2.3635	-0.7791	1.7865		49.765	0.1206	-0.7594	1.5651	0.0024	-0.5363	-0.0348	-1.5069	1.8493	-8.5572		49.75	-0.3613	-0.2378	4.0932	-0.0327	-0.0033	0.8641	0.5234	0.6954	-6.1074		49.766	-1.7027	0.2578	1.3142	0.1235	0.1726	-0.0445	-1.6338	2.7468	-22.1093
49.828	4.77	0.1795	1.3116	4.0187	-0.0453	-0.0034	2.7442	-0.7791	0.4255		49.828	0.1206	-0.8246	1.5586	0.0269	-0.5258	-0.0324	-0.3014	1.657	-9.7367		49.812	-0.3613	-0.2508	4.1322	-0.0274	0.002	0.9197	0.9676	0.8877	-4.6556		49.828	-1.5855	0.2578	1.3012	0.1184	0.1812	-0.0445	-1.6338	3.2597	-22.3815
49.89	4.8611	0.1795	1.3181	4.1361	-0.0716	0.0014	1.729	-1.0355	0.8791		49.89	0.0946	-0.9159	1.5781	0.0041	-0.5872	-0.0252	-0.4917	0.9518	-10.4626		49.875	-0.3482	-0.2247	4.1517	-0.0186	-0.0033	0.9317	0.3331	0.3748	-5.4722		49.891	-1.5073	0.2708	1.2947	0.1338	0.2207	-0.0372	-1.3166	2.6827	-21.202
49.953	4.9393	0.1795	1.3181	4.2728	-0.0401	-0.0107	2.6173	-1.0355	0.7884		49.953	0.1076	-0.9681	1.5716	-0.0116	-0.6205	-0.0228	-0.1745	1.2723	-10.0996		49.937	-0.3743	-0.2247	4.1906	-0.0309	-0.0085	0.9511	0.5234	0.3107	-5.4722		49.953	-1.4292	0.2578	1.2947	0.0929	0.2103	-0.0372	-1.6973	3.5802	-22.7444
50.015	5.0044	0.2056	1.3116	4.3569	-0.0716	-0.0131	2.4269	-0.715	0.4255		50.015	0.1076	-1.0594	1.5651	-0.0134	-0.6819	-0.0397	-0.238	1.5929	-10.1904		50	-0.3613	-0.2247	4.2296	-0.0256	0.0003	0.9777	0.5869	0.3748	-4.7464		50.016	-1.338	0.2578	1.3012	0.0878	0.2189	-0.0445	-1.0628	3.5802	-22.1093
50.078	5.0565	0.2187	1.3181	4.5357	-0.0857	-0.0203	2.5538	-1.0997	0.1533		50.078	0.1336	-1.1507	1.5586	0.0094	-0.7538	-0.0397	-0.6821	1.9134	-10.3718		50.062	-0.3482	-0.2378	4.2816	-0.0221	0.0073	1.0163	0.46	1.1441	-4.9278		50.078	-1.2599	0.2578	1.3012	0.115	0.2464	-0.0348	-1.0628	2.9392	-22.2
50.14	5.1216	0.1926	1.3051	4.6548	-0.0506	-0.0107	2.3	-1.0997	0.1533		50.14	0.0946	-1.2419	1.5456	0.0182	-0.8502	-0.0517	-1.1262	1.3365	-11.7328		50.125	-0.3743	-0.2117	4.3141	-0.0414	0.0266	1.0719	1.0945	0.7595	-4.8371		50.141	-1.1948	0.2578	1.3012	0.1763	0.2464	-0.0421	-1.9511	3.1956	-22.2908
50.203	5.2128	0.2187	1.3116	4.774	-0.0541	-0.0083	2.1731	-0.8432	0.1533		50.203	0.1206	-1.2941	1.5456	0.0112	-0.8537	-0.0469	-0.8724	1.5929	-11.5514		50.187	-0.4003	-0.2117	4.3596	-0.0484	0.009	1.0961	0.9676	1.2723	-4.2927		50.203	-1.1166	0.2578	1.2882	0.2121	0.2413	-0.0324	-1.4435	2.4263	-21.7464
50.265	5.3039	0.2317	1.3116	4.9106	-0.0506	-0.0203	2.7442	-0.5227	-0.3912		50.265	0.1076	-1.3724	1.5521	-0.0029	-0.9098	-0.0252	-0.0476	1.5288	-11.0977		50.25	-0.3352	-0.2117	4.3986	-0.0151	0.0178	1.113	1.031	0.9518	-4.4742		50.266	-1.0255	0.2578	1.2817	0.2189	0.2619	-0.0421	-1.38	3.0033	-21.8371
50.328	5.3691	0.2187	1.2986	5.021	-0.0559	-0.0372	2.6173	-0.5227	-2.2058		50.328	0.1076	-1.4636	1.5456	0.0269	-0.9326	-0.0493	-0.7455	1.3365	-11.1884		50.312	-0.3352	-0.2247	4.4441	-0.0169	-0.0015	1.1371	0.0158	1.08	-4.0205		50.328	-0.9473	0.2578	1.2817	0.2223	0.2035	-0.03	-1.7607	3.3879	-21.8371
50.39	5.4863	0.2187	1.3051	5.1945	-0.0681	-0.0131	1.8559	-0.9073	-0.5726		50.39	0.1206	-1.5289	1.5651	0.0129	-0.9677	-0.0372	-0.4283	1.9134	-11.1884		50.375	-0.3613	-0.2378	4.4896	0.0059	0.0248	1.1661	0.8407	0.6313	-4.1112		50.391	-0.8431	0.2578	1.2882	0.224	0.2258	-0.0275	-1.38	3.0033	-21.7464
50.453	5.5514	0.2578	1.2986	5.3102	-0.0401	-0.0107	2.4904	-0.5227	-0.8448		50.453	0.1076	-1.6332	1.5521	0.0182	-1.0606	-0.03	-0.4283	1.657	-11.0977		50.437	-0.3482	-0.2117	4.5416	-0.0046	0.0353	1.1976	0.3331	0.3748	-4.0205		50.453	-0.778	0.2578	1.2882	0.2343	0.2567	-0.0445	-2.0145	3.5161	-21.2927
50.515	5.6035	0.2317	1.2856	5.5222	-0.0173	-0.0155	1.6655	-1.9972	-1.6614		50.515	0.1206	-1.6854	1.5326	0.0234	-1.1816	-0.0155	-1.2531	1.4647	-11.6421		50.5	-0.3352	-0.2247	4.5806	0.0094	0.0213	1.2459	0.7772	0.9518	-4.202		50.516	-0.7129	0.2448	1.2752	0.2292	0.1897	-0.0421	-1.8876	3.6443	-22.4722
50.578	5.6816	0.2708	1.2856	5.6747	-0.0506	-0.0107	2.1731	-1.869	-1.8429		50.578	0.1206	-1.7766	1.5326	0.0182	-1.2044	-0.0372	-1.3166	2.1699	-11.1884		50.562	-0.3222	-0.2247	4.6196	-0.0134	0.016	1.2676	0.5234	0.0543	-3.839		50.578	-0.6348	0.2708	1.2622	0.2649	0.243	-0.0251	-1.1262	2.6186	-21.4742
50.64	5.7858	0.2839	1.2726	5.7483	0.0195	-0.0179	2.4904	-0.7791	-1.9336		50.64	0.0946	-1.8679	1.5131	0.0199	-1.2027	-0.0203	-0.8724	1.5929	-10.7348		50.625	-0.3222	-0.2117	4.6716	-0.0467	0.0213	1.3353	1.2848	0.4389	-4.0205		50.641	-0.5436	0.2578	1.2687	0.2939	0.2378	-0.0397	-1.6973	3.452	-21.5649
50.703	5.8509	0.2969	1.2856	5.8779	-0.0296	0.0087	2.3635	-0.7791	-2.3873		50.703	0.1076	-1.9462	1.5261	0.0234	-1.2483	-0.0276	-1.6338	2.1057	-12.0051		50.687	-0.3092	-0.2247	4.7106	-0.0134	-0.012	1.328	1.2848	1.2082	-3.839		50.703	-0.4655	0.2578	1.2622	0.3058	0.1777	-0.0494	-1.6338	3.5161	-21.8371
50.765	5.916	0.31	1.2856	6.0479	-0.0418	-0.0179	1.9193	-1.6125	-2.478		50.765	0.0685	-2.0114	1.5196	0.0444	-1.2903	-0.0276	0.0158	1.7211	-11.7328		50.75	-0.3222	-0.1986	4.7625	-0.0099	0.009	1.3764	0.3331	0.2466	-2.841		50.766	-0.3743	0.2708	1.2622	0.3092	0.2292	-0.0348	-1.6338	2.7468	-21.8371
50.828	6.0072	0.2839	1.2791	6.1706	0.0038	-0.0083	1.729	-2.1895	-2.478		50.828	0.1206	-2.1157	1.5196	0.0304	-1.3359	-0.0203	-0.6821	1.9134	-11.3699		50.812	-0.3222	-0.2247	4.7885	-0.0291	0.0073	1.4199	0.3965	0.4389	-2.2966		50.828	-0.3092	0.2578	1.2687	0.3348	0.2103	-0.0324	-1.1897	2.9392	-21.8371
50.89	6.0723	0.2839	1.2726	6.2897	-0.0453	-0.0179	2.1731	-1.9972	-2.3873		50.89	0.1076	-2.207	1.5066	0.0567	-1.4885	-0.0421	-1.5704	1.9134	-11.7328		50.875	-0.3352	-0.1986	4.834	-0.0256	-0.0068	1.444	0.2062	0.6313	-3.2039		50.891	-0.218	0.2578	1.2622	0.3705	0.1915	-0.0397	-1.6338	2.7468	-21.3834
50.953	6.1505	0.31	1.2791	6.4299	-0.0173	-0.0228	3.1883	-1.4843	-2.7502		50.953	0.0815	-2.2722	1.5001	0.0182	-1.5902	-0.0542	-1.6973	1.9134	-11.007		50.937	-0.3352	-0.2117	4.86	-0.0274	-0.0155	1.4996	0.3965	1.08	-2.841		50.953	-0.1399	0.2578	1.2622	0.3808	0.2224	-0.0348	-1.4435	2.6827	-21.6556
51.015	6.2156	0.2839	1.2596	6.5613	-0.0471	-0.0131	1.8559	-1.292	-3.2946		51.015	0.1076	-2.3635	1.4936	0.048	-1.6551	-0.059	-2.0145	1.4647	-12.0958		51	-0.3222	-0.1986	4.9055	0.0006	-0.019	1.4996	0.0793	0.6313	-2.9317		51.016	-0.0617	0.2448	1.2492	0.3808	0.2018	-0.0348	-1.0628	2.6827	-21.0205
51.078	6.3068	0.31	1.2661	6.698	-0.0296	-0.0252	2.998	-2.0613	-3.0224		51.078	0.1206	-2.4417	1.4936	0.0339	-1.6726	-0.0348	-0.6186	1.8493	-12.2773		51.062	-0.3222	-0.1856	4.9575	-0.0362	0.0003	1.5721	0.46	1.1441	-2.6595		51.078	0.0294	0.2708	1.2622	0.3552	0.1726	-0.0421	-1.38	3.6443	-21.0205
51.14	6.3719	0.2969	1.2596	6.8855	-0.0068	-0.0228	2.2366	-2.4459	-3.5668		51.14	0.1076	-2.507	1.4806	0.0392	-1.6884	-0.0445	0.0158	1.5929	-12.5495		51.125	-0.3222	-0.2117	4.9835	-0.0169	0.016	1.6204	1.4752	0.7595	-2.6595		51.141	0.1206	0.2578	1.2622	0.3705	0.2121	-0.0348	-1.2531	3.3879	-21.5649
51.203	6.437	0.31	1.2596	7.0415	-0.026	0.0038	3.0614	-2.1254	-3.839		51.203	0.1076	-2.5982	1.4676	0.0374	-1.7883	-0.0276	-1.4435	1.7852	-12.368		51.187	-0.3352	-0.1986	5.016	-0.0169	-0.0015	1.6301	0.3331	0.8877	-2.5688		51.203	0.1987	0.2578	1.2622	0.3808	0.1777	-0.0421	-1.0628	3.452	-20.7483
51.265	6.5542	0.31	1.2466	7.2115	-0.0208	-0.0252	2.7442	-2.5741	-4.202		51.265	0.1076	-2.6765	1.4741	0.0322	-1.9409	-0.0493	-1.7607	1.5929	-12.9124		51.25	-0.3222	-0.2117	5.0615	-0.0239	-0.019	1.6953	0.9041	0.9518	-2.0244		51.266	0.2639	0.2578	1.2557	0.4591	0.2018	-0.0324	-1.1897	2.5545	-21.5649
51.328	6.6323	0.336	1.2466	7.3289	-0.019	-0.0155	2.8076	-2.3818	-4.4742		51.328	0.0946	-2.7547	1.4546	0.0357	-2.0987	-0.03	-1.1897	2.0416	-12.4587		51.312	-0.3482	-0.1856	5.107	-0.0204	0.002	1.7219	0.3331	1.0159	-2.1151		51.328	0.342	0.2578	1.2557	0.5528	0.152	-0.0421	-1.3166	2.9392	-22.1093
51.39	6.6975	0.323	1.2401	7.448	-0.0401	-0.0131	2.4904	-2.1895	-4.5649		51.39	0.0815	-2.846	1.4481	0.0392	-2.0847	-0.0131	-1.38	1.5929	-12.8217		51.375	-0.3222	-0.1856	5.1395	-0.0379	-0.0015	1.7558	0.7138	1.4006	-2.0244		51.391	0.4201	0.2317	1.2427	0.5852	0.1399	-0.0372	-1.3166	2.1699	-21.9278
51.453	6.7886	0.3491	1.2336	7.5619	-0.0243	-0.0131	2.8076	-2.6382	-4.5649		51.453	0.0555	-2.9243	1.4546	0.0147	-2.1794	-0.03	-1.1897	1.657	-12.8217		51.437	-0.3222	-0.1726	5.172	-0.0134	-0.0085	1.7944	0.5869	1.1441	-2.478		51.453	0.4983	0.2578	1.2492	0.5631	0.1657	-0.0494	-1.5704	2.6827	-21.2927
51.515	6.8537	0.336	1.2271	7.7109	0.0125	-0.0179	2.6173	-2.7024	-6.1981		51.515	0.0425	-2.9764	1.4416	0.0112	-2.2495	-0.0252	-1.8242	1.7852	-12.0958		51.5	-0.3352	-0.1856	5.2175	-0.0274	-0.0015	1.8258	0.2696	0.4389	-2.2058		51.516	0.5894	0.2578	1.2427	0.5733	0.1176	-0.0372	-0.6821	3.3238	-22.0186
51.578	6.9319	0.336	1.2271	7.6548	-0.0366	-0.0058	2.3635	-2.0613	-5.0186		51.578	0.0164	-3.0547	1.4481	0.0252	-2.2776	-0.0228	-1.6973	1.9134	-13.0031		51.562	-0.2962	-0.1856	5.2565	-0.0309	0.0055	1.8887	1.031	0.6954	-1.3892		51.578	0.6676	0.2839	1.2557	0.5596	0.1142	-0.0227	-0.7455	3.3879	-20.7483
51.64	6.9189	0.3621	1.2141	7.3499	0.023	-0.03	3.1883	-0.3304	-4.4742		51.64	0.0034	-3.1329	1.4351	0.0234	-2.4196	-0.0131	-1.5069	1.9775	-12.8217		51.625	-0.3222	-0.1856	5.302	-0.0344	-0.0085	1.9587	1.4752	1.2723	-2.2966		51.641	0.7587	0.2578	1.2557	0.6073	0.097	-0.047	-1.3166	3.5802	-21.6556
51.703	6.9319	0.3491	1.2336	6.7926	0.0686	-0.0324	1.9828	1.2723	-4.7464		51.703	0.0164	-3.2242	1.4091	0.0217	-2.5546	-0.0421	-1.9511	1.657	-13.2753		51.687	-0.3222	-0.1856	5.3475	-0.0081	-0.0033	1.9732	1.1579	0.3107	-2.841		51.703	0.8239	0.2448	1.2557	0.6925	0.0489	-0.047	-1.8876	3.3879	-21.202
51.765	6.8668	0.3621	1.2336	6.6875	0.0195	-0.0155	2.5538	-0.5868	-1.7522		51.765	0.0294	-3.3025	1.4026	0.0199	-2.6125	-0.0324	-1.5704	1.9134	-13.0031		51.75	-0.3222	-0.1726	5.3864	-0.0274	-0.0015	2.0433	1.0945	1.0159	-1.117		51.766	0.915	0.2708	1.2557	0.7947	0.0524	-0.0397	-0.8724	2.6186	-21.8371
51.828	6.7756	0.3491	1.2271	6.4474	0.0669	-0.0252	2.2366	-2.0613	-0.5726		51.828	0.0425	-3.3546	1.3961	0.062	-2.7738	-0.0228	-1.5704	1.9134	-13.5475		51.812	-0.3352	-0.1726	5.4254	-0.0537	-0.0068	2.0941	1.2214	1.4006	-2.2058		51.828	0.9801	0.2708	1.2492	0.8373	0.0369	-0.0348	-1.1262	2.6186	-21.5649
51.89	6.7235	0.3752	1.2401	5.9778	0.116	-0.0034	2.6173	-0.138	-0.0282		51.89	0.0034	-3.459	1.3961	0.0409	-2.8755	-0.0421	-2.3318	1.9134	-13.0939		51.875	-0.3352	-0.1856	5.4644	-0.0169	-0.012	2.1351	2.3635	0.503	-1.6614		51.891	1.0583	0.2578	1.2557	0.9157	0.0026	-0.0348	-0.9359	2.4263	-21.8371
51.953	6.6584	0.3621	1.2401	5.8236	0.0704	-0.0493	3.4421	0.5672	0.6977		51.953	0.0034	-3.5503	1.4026	0.0392	-2.9299	-0.03	-2.3952	2.234	-14.0919		51.937	-0.3352	-0.1595	5.5294	-0.0186	-0.0208	2.1786	1.031	0.9518	-2.841		51.953	1.1625	0.2578	1.2622	0.9072	-0.0129	-0.0421	-0.4283	2.9392	-21.3834
52.015	6.5933	0.3491	1.2401	5.4504	0.1037	-0.0276	2.6807	1.5929	0.4255		52.015	0.0164	-3.6415	1.3961	0.0269	-2.9807	-0.03	-1.2531	1.8493	-13.5475		52	-0.3352	-0.1726	5.5294	-0.0537	-0.0208	2.2004	1.2214	1.0159	-2.1151		52.016	1.2406	0.2578	1.2622	0.9464	-0.0284	-0.0324	-1.5069	3.7726	-21.1112
52.078	6.5021	0.3491	1.2336	5.0876	0.1125	-0.0203	1.9828	2.5545	2.0587		52.078	0.0294	-3.6937	1.3896	0.0392	-3.0316	-0.0252	-0.9359	2.0416	-13.3661		52.062	-0.3352	-0.1986	5.5879	-0.0099	-0.012	2.285	1.8559	0.503	-2.7502		52.078	1.3057	0.2317	1.2557	1.0077	-0.0112	-0.0421	-0.4283	3.3238	-21.0205
52.14	6.424	0.3491	1.2336	4.9334	0.0949	-0.0179	2.7442	0.2466	1.4235		52.14	0.0034	-3.785	1.3766	0.069	-3.2122	-0.0179	-1.3166	2.0416	-13.0939		52.125	-0.3222	-0.1726	5.6334	-0.0379	-0.0085	2.3454	0.9676	1.1441	-2.3873		52.141	1.3709	0.2578	1.2687	1.1269	-0.0043	-0.0543	-0.4283	2.9392	-20.9298
52.203	6.3458	0.3491	1.2401	4.8458	0.123	-0.0155	2.1097	-0.6509	1.8772		52.203	0.0034	-3.8502	1.3701	0.069	-3.3981	0.0014	-1.8242	2.5545	-14.4549		52.187	-0.3352	-0.1726	5.6659	-0.0327	-0.0208	2.401	2.3	0.9518	-2.5688		52.203	1.449	0.2839	1.2622	1.1968	0.0146	-0.03	-0.7455	2.234	-21.9278
52.265	6.2677	0.3621	1.2466	4.5654	0.1125	-0.0372	1.7924	0.1825	2.2401		52.265	0.0164	-3.9284	1.3571	0.055	-3.4963	-0.0276	-2.0145	2.3622	-14.7271		52.25	-0.3743	-0.1726	5.6984	-0.0344	-0.005	2.4638	1.8559	0.503	-2.0244		52.266	1.5141	0.2839	1.2622	1.2803	-0.0009	-0.0251	0.0158	1.7211	-21.6556
52.328	6.2026	0.3491	1.2336	4.3306	0.137	-0.0228	2.7442	0.7595	2.6031		52.328	0.0034	-4.0197	1.3441	0.0585	-3.6401	-0.03	-2.0145	1.8493	-14.7271		52.312	-0.3222	-0.1726	5.7439	-0.0116	0.0003	2.4904	1.4117	0.8236	-2.3873		52.328	1.6053	0.2969	1.2687	1.3263	0.0043	-0.0348	-0.1745	1.7852	-21.3834
52.39	6.1374	0.3621	1.2401	4.0941	0.1388	-0.0324	2.5538	1.4647	2.1494		52.39	-0.0096	-4.111	1.3571	0.0707	-3.712	-0.0107	-2.078	2.1699	-14.0012		52.375	-0.3482	-0.1334	5.7959	-0.0449	-0.012	2.5653	1.2848	0.8236	-2.2966		52.391	1.6964	0.323	1.2622	1.3808	-0.0129	-0.0445	-0.9359	2.8109	-21.7464
52.453	6.0463	0.4013	1.2531	3.9399	0.1353	-0.0203	2.4904	2.5545	3.4197		52.453	0.0034	-4.1762	1.3506	0.0444	-3.7944	-0.0228	-1.8876	2.234	-14.0919		52.437	-0.3352	-0.1595	5.8479	-0.0239	-0.0015	2.5846	1.4752	0.6313	-2.478		52.453	1.7616	0.3491	1.2687	1.4336	-0.0181	-0.0275	-0.0476	3.0674	-21.3834
52.515	5.9421	0.3621	1.2466	3.8084	0.1195	-0.0517	1.7924	1.5929	4.327		52.515	0.0164	-4.2414	1.3376	0.062	-3.9452	-0.0155	-1.8876	2.234	-14.0012		52.5	-0.3482	-0.1726	5.8804	-0.0362	-0.0208	2.6498	1.6655	0.9518	-2.478		52.516	1.8397	0.3491	1.2687	1.5392	0.006	-0.0518	-0.4917	3.2597	-20.839
52.578	5.916	0.3882	1.2661	3.684	0.1388	-0.0203	2.7442	1.1441	3.8733		52.578	0.0425	-4.3327	1.3506	0.0532	-4.1679	-0.0203	-2.7125	2.5545	-14.9993		52.562	-0.3352	-0.1595	5.9259	-0.0414	-0.0225	2.7006	1.2848	1.2082	-2.2058		52.578	1.9309	0.3621	1.2687	1.6448	-0.0318	-0.0445	-0.809	2.0416	-20.9298
52.64	5.8379	0.3752	1.2596	3.4667	0.1318	-0.03	1.5386	0.8236	4.6899		52.64	0.0164	-4.3849	1.3311	0.0585	-4.2854	-0.0228	-2.7759	2.6186	-15.1807		52.625	-0.3222	-0.1726	5.9648	-0.0011	-0.0173	2.7731	2.4269	0.9518	-1.7522		52.641	1.983	0.3882	1.2687	1.7607	-0.0181	-0.0275	0.0793	2.1699	-20.9298
52.703	5.7467	0.3752	1.2531	3.3756	0.1388	-0.0348	2.6807	1.2082	3.8733		52.703	0.0034	-4.4501	1.3116	0.055	-4.4888	-0.0131	-3.347	2.9392	-14.5456		52.687	-0.3352	-0.1334	5.9973	-0.0379	-0.019	2.8335	2.3	0.9518	-2.0244		52.703	2.0611	0.4143	1.2557	1.9038	-0.0524	-0.0567	-1.1897	1.9134	-21.0205
52.765	5.6816	0.3752	1.2726	3.118	0.1265	-0.0155	1.9193	1.3365	3.9641		52.765	0.0164	-4.5805	1.3181	0.0777	-4.6028	-0.0083	-2.649	2.875	-14.6363		52.75	-0.3352	-0.1465	6.0493	-0.0169	-0.0401	2.8625	1.6021	0.503	-1.8429		52.766	2.1523	0.4273	1.2687	1.9907	-0.0747	-0.0251	-0.4283	2.4263	-20.9298
52.828	5.6165	0.3621	1.2726	2.9393	0.13	-0.0397	2.998	2.5545	5.2343		52.828	0.0294	-4.6457	1.3116	0.0953	-4.6659	-0.0107	-1.9511	2.6827	-14.2734		52.812	-0.3222	-0.1334	6.0688	-0.0186	-0.0138	2.9036	1.2214	0.7595	-2.2058		52.828	2.2174	0.4534	1.2622	2.0503	-0.0181	-0.0251	-0.3014	2.5545	-20.3854
52.89	5.5253	0.3491	1.2661	2.8377	0.1335	-0.0252	2.5538	1.9775	3.8733		52.89	0.0294	-4.724	1.3181	0.0602	-4.8307	-0.0083	-2.4587	2.9392	-15.9973		52.875	-0.3092	-0.1595	6.1078	-0.0362	-0.0524	2.9519	1.5386	0.1825	-2.5688		52.891	2.3085	0.4404	1.2622	2.1372	-0.1022	-0.0372	-0.9993	2.875	-21.7464
52.953	5.4212	0.3752	1.2726	2.7202	0.1318	-0.0493	1.4752	1.657	4.327		52.953	0.0425	-4.8022	1.3051	0.076	-4.9552	-0.0155	-2.3318	3.3238	-14.7271		52.937	-0.3613	-0.1595	6.1468	-0.0134	-0.026	3.0244	1.9828	0.6313	-2.2966		52.953	2.3737	0.4665	1.2622	2.3177	-0.0679	-0.047	-0.3014	2.9392	-21.2927
53.015	5.3691	0.3882	1.2856	2.6134	0.137	-0.0276	1.9828	1.5288	3.9641		53.015	-0.0096	-4.8805	1.3051	0.0953	-5.1323	-0.0155	-3.8546	3.1956	-14.9993		53	-0.3482	-0.1595	6.2053	-0.0256	-0.0173	3.1114	1.8559	0.6313	-2.2058		53.016	2.4388	0.4665	1.2622	2.5051	-0.006	-0.0543	-0.6821	1.9134	-20.9298
53.078	5.2519	0.3752	1.2791	2.4294	0.1142	-0.0469	1.1579	1.9775	4.0548		53.078	0.0034	-4.9587	1.2986	0.0742	-5.2796	-0.0107	-3.1566	3.1315	-15.6344		53.062	-0.3222	-0.1334	6.2313	-0.0344	-0.0471	3.1452	0.8407	0.7595	-1.8429		53.078	2.5169	0.4795	1.2427	2.6074	-0.085	-0.047	-0.9993	1.4647	-21.202
53.14	5.1998	0.3621	1.2856	2.2681	0.1353	-0.0083	2.1097	1.657	4.2363		53.14	0.0294	-5.063	1.3051	0.0777	-5.4199	-0.0179	-3.0297	2.4904	-14.9085		53.125	-0.3613	-0.1204	6.2703	-0.0309	-0.0471	3.1984	1.2214	0.503	-1.48		53.141	2.569	0.4665	1.2492	2.7368	-0.0438	-0.0445	-0.1745	1.7852	-21.5649
53.203	5.1216	0.3752	1.2856	2.1753	0.137	-0.0083	1.7924	2.1057	3.4197		53.203	-0.0096	-5.1282	1.3246	0.1023	-5.5041	-0.0131	-2.3318	2.8109	-14.8178		53.187	-0.3352	-0.1334	6.3223	-0.0204	-0.0225	3.2709	1.0945	1.0159	-1.3892		53.203	2.6602	0.4665	1.2297	2.8544	-0.1005	-0.0421	-0.4283	3.1956	-21.3834
53.265	5.0695	0.3491	1.3116	2.0071	0.0949	-0.0397	0.5869	2.2981	3.2382		53.265	0.0164	-5.2195	1.2856	0.097	-5.7198	-0.0155	-3.0297	3.0033	-16.0881		53.25	-0.3613	-0.1465	6.3613	-0.0397	-0.0313	3.324	1.2848	0.6954	-1.2078		53.266	2.7383	0.4795	1.2362	3.0503	-0.1331	-0.0543	-1.0628	2.2981	-21.6556
53.328	5.0044	0.3621	1.3051	1.9177	0.1353	-0.0179	2.2366	1.7852	3.5104		53.328	0.0425	-5.3108	1.2856	0.1058	-5.8408	0.0038	-2.9028	2.6186	-15.6344		53.312	-0.3613	-0.1334	6.3743	-0.0204	-0.0225	3.3965	1.9828	0.6313	-2.2058		53.328	2.8165	0.4925	1.2362	3.2019	-0.0696	-0.0543	-0.1111	1.7211	-21.5649
53.39	4.9132	0.4013	1.3116	1.8599	0.137	-0.0252	2.3	1.8493	3.8733		53.39	0.0294	-5.3499	1.2921	0.1128	-5.9705	0.0038	-2.5856	3.1956	-14.6363		53.375	-0.3743	-0.1074	6.4263	-0.0116	-0.0383	3.4666	1.6021	1.1441	-1.8429		53.391	2.8816	0.4925	1.2297	3.3706	-0.1297	-0.0421	-1.1262	1.5929	-21.8371
53.453	4.8611	0.3752	1.2986	1.7828	0.1405	-0.0397	0.9676	1.2723	3.1475		53.453	0.0294	-5.4543	1.2856	0.1023	-6.1248	-0.0034	-2.3318	3.0674	-15.8159		53.437	-0.3743	-0.1204	6.4718	-0.0291	-0.0524	3.5198	2.2366	1.0159	-2.0244		53.453	2.9597	0.4795	1.2232	3.5358	-0.1383	-0.0397	-0.6186	1.5929	-21.1112
53.515	4.77	0.3621	1.3181	1.7284	0.1072	-0.0421	1.729	2.1699	3.1475		53.515	0.0034	-5.5195	1.2856	0.1058	-6.3282	-0.0058	-2.5856	3.1956	-15.9066		53.5	-0.3743	-0.1465	6.5173	-0.0221	-0.0594	3.6068	1.9193	1.3365	-0.6634		53.516	3.0248	0.4925	1.2167	3.6721	-0.0524	-0.0567	-0.6186	2.1057	-21.8371
53.578	4.6788	0.3621	1.3246	1.5339	0.144	-0.0203	1.1579	2.3622	3.4197		53.578	0.0034	-5.5977	1.2726	0.1198	-6.458	0.0062	-2.1414	2.7468	-15.2715		53.562	-0.3743	-0.1204	6.5562	-0.0239	-0.0471	3.7083	2.8711	1.1441	-0.9356		53.578	3.103	0.5056	1.2102	3.8833	-0.0524	-0.0421	-0.0476	2.0416	-22.6537
53.64	4.6137	0.3491	1.3181	1.4288	0.144	-0.0179	0.8407	1.9134	2.966		53.64	0.0034	-5.7021	1.2791	0.09	-6.6474	-0.0107	-3.5373	2.7468	-15.8159		53.625	-0.3743	-0.1204	6.5952	-0.0554	-0.0401	3.7711	1.6021	0.8877	-0.8448		53.641	3.1811	0.4925	1.1972	4.0827	-0.1366	-0.0372	-0.1111	1.7211	-22.6537
53.703	4.5616	0.3621	1.3441	1.3236	0.1721	-0.03	1.0945	1.657	3.8733		53.703	0.0034	-5.7412	1.2726	0.097	-6.7894	0.0111	-3.4104	3.2597	-15.8159		53.687	-0.3743	-0.0943	6.6472	-0.0169	-0.0506	3.846	1.2214	0.7595	-1.0263		53.703	3.2723	0.5056	1.1972	4.253	-0.0713	-0.064	-0.809	1.9134	-21.9278
53.765	4.4704	0.336	1.3571	1.2465	0.1686	-0.0179	0.9676	1.9134	3.6011		53.765	0.0164	-5.8325	1.2791	0.1075	-6.9402	0.0111	-2.7759	3.0033	-15.4529		53.75	-0.3613	-0.1074	6.6927	-0.0239	-0.0471	3.9233	1.9193	0.4389	-1.2985		53.766	3.3244	0.5186	1.1842	4.4234	-0.1194	-0.0372	-0.4283	1.7852	-22.2
53.828	4.3793	0.336	1.3506	1.187	0.1476	-0.0131	0.9041	2.1057	3.3289		53.828	0.0164	-5.9238	1.2661	0.1128	-7.0226	0.0038	-2.2683	3.0033	-15.8159		53.812	-0.3743	-0.0943	6.7317	-0.0169	-0.0471	4.0103	1.9193	0.8236	-1.9336		53.828	3.4025	0.5317	1.1972	4.6431	-0.0524	-0.0372	-0.3648	1.3365	-21.5649
53.89	4.3142	0.31	1.3636	1.1029	0.1546	-0.0179	1.0945	1.5288	3.8733		53.89	0.0164	-5.9759	1.2726	0.1093	-7.2997	-0.0155	-3.7911	2.234	-16.3603		53.875	-0.4003	-0.1334	6.7902	-0.0239	-0.0611	4.0683	2.4904	1.7852	-1.8429		53.891	3.4807	0.5186	1.1777	4.8629	-0.0438	-0.0713	-0.6186	1.9775	-21.202
53.953	4.1969	0.336	1.3571	1.0818	0.1546	-0.0155	1.1579	1.4647	2.966		53.953	0.0034	-6.0542	1.2791	0.0988	-7.5452	0.0014	-3.918	3.3879	-15.7251		53.937	-0.3743	-0.1334	6.8097	-0.0099	-0.0646	4.1577	1.7924	1.2082	-0.8448		53.953	3.5588	0.5186	1.1777	5.0673	-0.1709	-0.047	-1.0628	1.4006	-22.7444
54.015	4.1318	0.323	1.3506	1.017	0.1423	-0.0203	0.8407	1.2723	2.6938		54.015	0.0425	-6.1585	1.2726	0.1023	-7.6749	0.0014	-3.4104	2.875	-15.4529		54	-0.3613	-0.1074	6.8422	-0.0099	-0.0471	4.2375	2.5538	1.4647	-1.3892		54.016	3.6239	0.5447	1.1842	5.2956	-0.1022	-0.0324	0.1427	1.4647	-22.4722
54.078	4.0667	0.31	1.3571	0.9154	0.1633	-0.0252	0.3331	1.9134	2.8753		54.078	0.0294	-6.2107	1.2661	0.0935	-7.6942	-0.001	-2.3318	2.5545	-16.6325		54.062	-0.4003	-0.0813	6.9072	-0.0134	-0.0296	4.3051	1.9193	0.9518	-1.117		54.078	3.676	0.5447	1.1777	5.5426	-0.1039	-0.0445	-0.3648	0.4389	-22.0186
54.14	4.0016	0.31	1.3831	0.8365	0.1476	-0.0203	-0.0476	2.6827	3.2382		54.14	0.0034	-6.2498	1.2596	0.1058	-7.447	-0.001	-2.0145	2.7468	-15.1807		54.125	-0.4264	-0.0813	6.9332	-0.0029	-0.0646	4.3583	1.729	1.0159	-1.6614		54.141	3.7542	0.5317	1.1712	5.6874	-0.1262	-0.0616	-0.9993	1.2082	-22.3815
54.203	3.8844	0.2839	1.3831	0.7979	0.1546	-0.0179	-0.238	2.4904	3.0567		54.203	-0.0227	-6.2628	1.2661	0.0883	-6.8824	-0.0083	-0.8724	2.6186	-13.2753		54.187	-0.4003	-0.0943	6.9722	-0.0064	-0.0471	4.4404	1.7924	1.3365	-2.0244		54.203	3.8323	0.5317	1.1647	5.9276	-0.1108	-0.0372	-0.3014	1.2723	-22.7444
54.265	3.8193	0.2969	1.3766	0.7331	0.1353	-0.03	-0.238	2.1057	1.5143		54.265	0.0034	-6.2237	1.2596	0.1005	-6.2458	-0.0083	1.4752	2.6827	-11.8236		54.25	-0.3743	-0.0813	7.0242	-0.0169	-0.0401	4.5468	1.3483	0.2466	-0.9356		54.266	3.8974	0.5447	1.1712	6.1065	-0.2259	-0.0688	-0.9993	1.7211	-22.8352
54.328	3.7411	0.31	1.3831	0.7261	0.1458	-0.0276	-0.0476	1.9134	1.9679		54.328	0.0164	-6.1194	1.2531	0.0848	-6.2055	0.0087	-1.9511	2.6827	-8.1035		54.312	-0.4134	-0.0943	7.0632	-0.0221	-0.0699	4.5951	1.3483	0.6313	-0.8448		54.328	3.9755	0.5577	1.1712	6.3109	-0.1297	-0.047	0.46	1.5288	-22.563
54.39	3.689	0.323	1.3831	0.6525	0.1668	-0.0179	-0.3648	2.4904	2.3309		54.39	0.0164	-6.0281	1.2726	0.0742	-5.732	-0.0107	-0.8724	2.7468	-7.4684		54.375	-0.3873	-0.0813	7.0957	-0.0204	-0.0541	4.6748	2.3	1.4647	-0.5726		54.391	4.0407	0.5577	1.1647	6.5971	-0.1056	-0.0761	-0.7455	1.08	-22.2
54.453	3.5588	0.2969	1.3831	0.6192	0.1616	-0.0203	0.3965	2.3622	1.8772		54.453	0.0034	-5.9629	1.2726	0.104	-5.4778	-0.0155	-0.1111	2.6186	-6.924		54.437	-0.4134	-0.0682	7.1346	-0.0274	-0.0541	4.7352	2.2366	1.1441	-1.2985		54.453	4.1188	0.5838	1.1647	6.9259	-0.1726	-0.047	-0.5552	1.1441	-22.8352
54.515	3.4807	0.2839	1.3961	0.5439	0.1528	-0.0107	0.1427	1.9775	2.3309		54.515	0.0164	-5.9107	1.2531	0.1023	-5.0902	-0.0058	0.5234	2.4904	-5.9259		54.5	-0.4134	-0.0813	7.1606	-0.0291	-0.0664	4.7836	1.9828	1.1441	-1.117		54.516	4.1839	0.5838	1.1712	7.127	-0.2344	-0.0518	-0.4283	0.7595	-22.4722
54.578	3.3895	0.31	1.3961	0.4983	0.1458	-0.0276	-0.1111	2.234	1.1513		54.578	0.0164	-5.8455	1.2661	0.0812	-4.7571	-0.0252	0.46	2.8109	-4.5649		54.562	-0.4134	-0.0422	7.2191	-0.0116	-0.0488	4.8827	1.9193	1.5929	-1.0263		54.578	4.236	0.623	1.1712	7.3518	-0.1589	-0.0567	-0.6186	0.5672	-23.0166
54.64	3.3504	0.2578	1.4091	0.4597	0.1458	-0.0034	0.0158	2.234	1.0606		54.64	0.0164	-5.7281	1.2661	0.0637	-4.5922	-0.0131	0.3331	2.2981	-3.4761		54.625	-0.4264	-0.0682	7.2451	-0.0291	-0.0594	4.96	1.6655	0.9518	-0.6634		54.641	4.3402	0.5708	1.1582	7.5256	-0.255	-0.0397	-0.4283	1.1441	-23.1981
54.703	3.2202	0.2578	1.4091	0.4457	0.1739	-0.0469	0.7138	1.657	0.7884		54.703	-0.0096	-5.676	1.2531	0.0602	-4.3117	-0.0203	-0.238	2.1057	-2.478		54.687	-0.4003	-0.0422	7.2776	-0.0099	-0.0541	5.0325	1.9828	1.2723	-0.4819		54.703	4.3923	0.5969	1.1582	7.7011	-0.1812	-0.0567	-0.6821	1.4006	-22.563
54.765	3.1551	0.2708	1.4091	0.4212	0.1739	0.0014	0.9676	1.9134	-0.4819		54.765	-0.0617	-5.6108	1.2726	0.0182	-3.9925	-0.0228	1.4117	2.4904	-1.2985		54.75	-0.4134	-0.0682	7.2971	-0.0186	-0.0488	5.1026	1.5386	1.08	-1.117		54.766	4.4314	0.5969	1.1517	7.5137	-0.1846	-0.0543	-0.4283	2.8109	-23.924
54.828	3.0769	0.2578	1.4091	0.3862	0.1739	-0.0155	0.9041	2.3622	-0.3004		54.828	-0.0617	-5.5064	1.2726	0.0374	-3.8926	-0.0131	0.7138	2.5545	-1.3892		54.812	-0.4264	-0.0682	7.3491	-0.0362	-0.0629	5.1944	1.6021	1.0159	-0.5726		54.828	4.4314	0.5969	1.1452	6.9787	-0.0198	-0.047	-0.6821	3.5802	-23.924
54.89	3.0118	0.2187	1.4221	0.3423	0.1476	-0.0324	1.031	1.8493	-0.3004		54.89	-0.0487	-5.4543	1.2791	0.0409	-3.6506	-0.0252	0.6503	1.9775	-0.3912		54.875	-0.4134	-0.0552	7.3881	0.0199	-0.0383	5.2814	2.3	1.3365	-1.0263		54.891	4.4183	0.5969	1.1387	6.7999	0.0094	-0.0421	-1.1262	2.4904	-23.8332
54.953	2.9337	0.2448	1.4221	0.2635	0.1493	-0.0155	-0.3014	2.5545	-0.6634		54.953	-0.0357	-5.376	1.2726	0.0427	-3.463	-0.0203	1.1579	2.1057	-0.9356		54.937	-0.4394	-0.0682	7.4336	0.0041	-0.0471	5.3877	2.6173	1.2723	-0.8448		54.953	4.3402	0.5969	1.1322	6.3416	0.0489	-0.0591	-0.8724	3.1315	-23.1981
55.015	2.8425	0.2056	1.4416	0.26	0.1598	-0.0179	0.0158	2.1057	-0.8448		55.015	-0.0748	-5.2847	1.2661	0.0374	-3.3735	-0.0107	1.2848	1.8493	-1.48		55	-0.4134	0.01	7.4921	0.0199	-0.0524	5.4409	1.9193	1.08	-1.2078		55.016	4.2621	0.5969	1.1387	5.8799	0.2018	-0.0202	-0.809	3.9649	-23.561
55.078	2.7644	0.2187	1.4416	0.2197	0.1546	-0.0203	0.6503	2.1057	-1.6614		55.078	-0.0227	-5.2195	1.2661	0.0462	-3.1438	-0.03	1.9193	1.9775	-1.0263		55.062	-0.4264	-0.0552	7.5311	-0.0134	-0.0401	5.5351	2.1731	1.4647	-0.6634		55.078	4.21	0.5838	1.1322	5.6619	0.0987	-0.0518	-1.4435	2.6827	-22.563
55.14	2.6862	0.2187	1.4546	0.1934	0.1318	-0.0276	-0.1111	1.8493	-1.5707		55.14	-0.0357	-5.1152	1.2726	0.0006	-2.9544	-0.0252	2.2366	2.4263	-0.2097		55.125	-0.4264	-0.0161	7.5636	-0.0186	-0.0559	5.6076	1.3483	1.1441	-1.2078		55.141	4.1449	0.5969	1.1127	5.3382	0.1708	-0.0494	-0.6821	3.452	-23.0166
55.203	2.6081	0.1926	1.4676	0.2004	0.1493	-0.0276	0.0158	1.9775	-1.2078		55.203	-0.0357	-5.063	1.2791	0.0304	-2.8475	-0.0276	2.4904	2.1699	-0.3004		55.187	-0.4394	0.01	7.5896	-0.0169	-0.0366	5.7067	2.7442	1.4006	-1.2985		55.203	4.0797	0.5969	1.1257	4.8663	0.2035	-0.0591	-1.6973	6.2728	-22.3815
55.265	2.5039	0.1795	1.4676	0.1548	0.1774	-0.001	0.3331	2.2981	-2.5688		55.265	-0.0357	-4.9717	1.2921	0.0462	-2.758	-0.0397	1.2848	1.5929	0.0625		55.25	-0.4264	-0.0422	7.6546	-0.0151	-0.0418	5.8106	2.3635	0.7595	-0.6634		55.266	3.9886	0.5969	1.1257	4.6534	0.1743	-0.047	-1.7607	4.7983	-22.2
55.328	2.4258	0.1926	1.4806	0.1321	0.1651	-0.0203	-0.0476	2.2981	-2.5688		55.328	-0.0487	-4.8805	1.2921	0.0076	-2.6704	-0.0228	1.3483	2.1699	0.1533		55.312	-0.4264	-0.0422	7.6936	-0.0239	-0.0436	5.9048	2.3635	1.4006	-0.3912		55.328	3.9235	0.5838	1.1192	4.5477	0.2636	-0.0445	-0.809	3.8367	-22.6537
55.39	2.3606	0.1665	1.4871	0.111	0.1826	-0.0107	0.5869	2.5545	-2.5688		55.39	-0.0357	-4.7892	1.2921	0.0462	-2.5441	-0.0252	1.3483	1.5288	-0.119		55.375	-0.4524	-0.0291	7.739	-0.0151	-0.0629	5.9918	1.9828	1.1441	-0.9356		55.391	3.8583	0.623	1.1192	4.1576	0.2	-0.047	-1.5069	4.5419	-22.9259
55.453	2.2564	0.1665	1.5001	0.0918	0.1739	-0.0179	1.1579	2.1057	-3.0224		55.453	-0.0487	-4.7109	1.2986	0.0392	-2.3232	-0.0445	2.2366	1.5288	0.5162		55.437	-0.4915	-0.0422	7.7845	0.0041	-0.0506	6.1126	2.4904	1.2723	-0.9356		55.453	3.7932	0.5969	1.1192	3.8748	0.2344	-0.03	-1.38	4.7983	-22.563
55.515	2.1783	0.1535	1.5001	0.0742	0.1493	-0.0517	0.5869	1.4006	-4.202		55.515	-0.0617	-4.6718	1.3116	0.0094	-2.2302	-0.0203	1.9828	2.2981	-0.0282		55.5	-0.4655	-0.003	7.8235	0.0024	-0.0734	6.1827	1.8559	1.4006	-0.3912		55.516	3.7411	0.5969	1.1257	3.851	0.1932	-0.0567	-2.3318	4.4777	-22.6537
55.578	2.0871	0.1535	1.5131	0.0672	0.1563	-0.0131	0.3965	1.8493	-4.1112		55.578	-0.0617	-4.5414	1.3051	0.0374	-2.097	-0.0421	2.4904	2.2981	0.5162		55.562	-0.4394	-0.0291	7.8625	-0.0081	-0.0664	6.2963	1.9828	1.1441	0.0625		55.578	3.663	0.6099	1.1322	3.5188	0.2155	-0.0518	-1.4435	4.8624	-22.3815
55.64	2.009	0.1143	1.5131	0.0515	0.1265	-0.0276	0.2062	1.9134	-4.0205		55.64	-0.0617	-4.4501	1.3311	0.0164	-2.0093	-0.0687	1.6021	1.657	0.244		55.625	-0.4264	0.01	7.9015	-0.0344	-0.0892	6.3615	2.0462	1.3365	-0.3912		55.641	3.5718	0.5969	1.1387	3.2735	0.2292	-0.0591	-0.809	5.1188	-22.1093
55.703	1.9178	0.1274	1.5196	0.055	0.1581	-0.0397	0.7772	1.7211	-4.9278		55.703	-0.0878	-4.3719	1.3051	0.0602	-1.9128	-0.0493	1.2848	1.5929	0.7884		55.687	-0.4655	-0.0161	7.9665	0.0129	-0.0594	6.4799	2.6807	1.08	-0.3912		55.703	3.5067	0.5969	1.1517	3.2019	0.2224	-0.0591	-1.8876	4.6701	-22.9259
55.765	1.8527	0.1143	1.5261	0.0339	0.1651	-0.0348	1.3483	1.657	-4.4742		55.765	-0.0878	-4.2936	1.3246	0.0164	-1.8585	-0.03	1.3483	1.7852	0.6977		55.75	-0.4524	-0.0161	7.9925	-0.0151	-0.0559	6.5669	2.6173	1.5288	-0.9356		55.766	3.4286	0.5969	1.1517	2.9498	0.1983	-0.0324	-1.4435	4.7342	-22.6537
55.828	1.7746	0.1143	1.5261	0.0041	0.1528	-0.0203	0.46	1.1441	-4.0205		55.828	-0.0748	-4.2284	1.3246	-0.0099	-1.6744	-0.0372	1.9828	1.657	1.8772		55.812	-0.4394	0.0231	8.038	-0.0099	-0.0681	6.6225	1.9828	0.7595	-0.3004		55.828	3.3634	0.5969	1.1582	2.6993	0.2481	-0.0591	-1.5069	5.4394	-22.8352
55.89	1.7355	0.0883	1.5261	0.0392	0.1563	-0.0372	0.5234	1.7211	-5.0186		55.89	-0.0748	-4.1501	1.3311	0.0287	-1.5867	-0.0348	2.998	1.657	0.6977		55.875	-0.4524	0.01	8.0705	0.0041	-0.0436	6.7457	2.5538	1.7211	-0.4819		55.891	3.2983	0.6099	1.1712	2.6142	0.2103	-0.0518	-1.8876	5.0547	-22.3815
55.953	1.6834	0.1013	1.5391	0.0112	0.1633	-0.03	0.5869	2.1699	-4.4742		55.953	-0.0487	-4.0719	1.3311	-0.0274	-1.4148	-0.0276	3.0614	1.7211	0.9699		55.937	-0.4655	-0.0161	8.103	0.0024	-0.0559	6.8086	2.3	0.8236	-0.7541		55.953	3.2072	0.5969	1.1842	2.391	0.2189	-0.0445	-1.6973	4.606	-22.563
56.015	1.6313	0.0883	1.5391	-0.0081	0.1511	-0.0179	1.0945	1.5288	-5.1093		56.015	-0.1008	-4.0197	1.3246	-0.0046	-1.4236	-0.0348	2.9345	2.1057	0.244		56	-0.4655	0.01	8.1355	-0.0099	-0.0541	6.8762	1.9828	1.657	-1.0263		56.016	3.142	0.5969	1.1972	2.2445	0.2567	-0.0494	-1.6338	4.9265	-22.6537
56.078	1.6053	0.0883	1.5326	-0.0221	0.1476	-0.0155	0.7138	1.7852	-4.6556		56.078	-0.0878	-3.9024	1.3376	0.0112	-1.2991	-0.0421	2.1731	2.1057	1.605		56.062	-0.4915	0.01	8.1875	-0.0151	-0.0524	6.9946	1.6655	1.8493	-0.0282		56.078	3.0509	0.5969	1.2037	2.1355	0.1949	-0.0445	-1.1897	5.247	-23.2888
56.14	1.5662	0.0752	1.5456	0.0269	0.144	-0.0203	0.6503	1.7211	-4.9278		56.14	-0.0617	-3.8372	1.3376	0.0269	-1.3184	-0.0566	1.7924	1.5929	0.0625		56.125	-0.4524	0.0231	8.2395	0.0059	-0.0594	7.0599	2.2366	0.7595	0.4255		56.141	2.9858	0.5969	1.2167	1.943	0.2	-0.0372	-1.6973	4.9906	-22.4722
56.203	1.5792	0.1013	1.5326	0.0059	0.1651	-0.0372	0.46	2.1699	-4.2927		56.203	-0.0748	-3.8111	1.3376	-0.0099	-1.1729	-0.0493	2.3635	2.2981	1.1513		56.187	-0.4655	0.01	8.246	-0.0239	-0.0436	7.142	1.9193	1.4647	0.1533		56.203	2.9206	0.5969	1.2232	1.8373	0.2516	-0.064	-1.5069	6.3369	-23.2888
56.265	1.5662	0.0622	1.5326	0.0182	0.1493	0.0014	1.6021	1.1441	-5.3815		56.265	-0.0878	-3.6676	1.3506	0.0059	-1.0834	-0.0542	1.9828	2.2981	1.605		56.25	-0.4785	-0.003	8.2915	-0.0204	-0.0541	7.2169	2.3635	1.657	-0.3004		56.266	2.8555	0.5969	1.2362	1.6993	0.2189	-0.0324	-1.7607	5.3111	-23.1074
56.328	1.5792	0.0491	1.5391	0.0147	0.1493	-0.0276	0.5869	2.0416	-4.5649		56.328	-0.0487	-3.6024	1.3506	0.0252	-0.98	-0.059	2.6173	1.5288	1.6957		56.312	-0.4785	0.0231	8.3434	-0.0239	-0.0541	7.3112	1.9828	1.5288	-0.5726		56.328	2.7644	0.5969	1.2362	1.5869	0.2602	-0.0664	-1.38	4.5419	-22.9259
56.39	1.5662	0.0752	1.5521	0.0304	0.1581	-0.0155	1.031	1.3365	-4.4742		56.39	-0.0878	-3.4981	1.3571	0.0094	-0.887	-0.0421	2.6173	2.1699	2.2401		56.375	-0.4785	-0.003	8.3759	0.0199	-0.0453	7.4272	2.2366	1.7852	-0.5726		56.391	2.6862	0.5969	1.2557	1.4677	0.2258	-0.0275	-1.2531	4.9265	-22.9259
56.453	1.5532	0.0883	1.5521	0.0339	0.1651	-0.0155	1.4752	1.2723	-4.7464		56.453	-0.0878	-3.4329	1.3506	0.0041	-0.8397	-0.0493	2.6807	1.8493	1.3328		56.437	-0.4655	0.0361	8.4019	0.0129	-0.0383	7.4924	2.4269	1.2082	-0.3004		56.453	2.6081	0.5969	1.2492	1.3859	0.243	-0.0324	-1.0628	5.247	-23.6518
56.515	1.5271	0.0622	1.5586	0.0357	0.1633	-0.0276	0.46	1.9134	-5.1093		56.515	-0.0748	-3.3416	1.3701	-0.0169	-0.7731	-0.0397	3.0614	2.1057	2.1494		56.5	-0.4915	0.0361	8.4539	-0.0134	-0.0611	7.5963	1.7924	1.2082	-0.2097		56.516	2.5299	0.6099	1.2622	1.2717	0.2653	-0.0567	-1.7607	5.1829	-23.1981
56.578	1.5532	0.0752	1.5456	0.0147	0.1563	-0.0228	0.9041	1.7211	-4.6556		56.578	-0.1138	-3.2503	1.3766	-0.0099	-0.7485	-0.0445	2.1731	1.9775	1.605		56.562	-0.4785	0.0361	8.4799	0.0041	-0.0681	7.6737	2.1731	1.3365	-0.3004		56.578	2.4648	0.5969	1.2622	1.0861	0.2911	-0.0494	-1.4435	5.8881	-23.4703
56.64	1.5271	0.0752	1.5391	0.0006	0.1493	-0.03	0.5869	1.4006	-4.5649		56.64	-0.1138	-3.1981	1.3766	-0.0116	-0.7292	-0.0421	1.5386	1.4647	1.8772		56.625	-0.4915	-0.003	8.5254	0.0112	-0.0716	7.6398	2.1097	1.1441	-1.0263		56.641	2.4127	0.5969	1.2687	0.9992	0.279	-0.0445	-1.0628	6.0163	-23.7425
56.703	1.5271	0.0752	1.5456	0.0112	0.1633	-0.0058	1.0945	1.2723	-5.2908		56.703	-0.0878	-3.0938	1.3636	0.0112	-0.6258	-0.0445	2.1097	1.7852	1.605		56.687	-0.4915	0.0231	8.5384	0.0024	-0.0453	7.5649	2.1097	0.8877	0.0625		56.703	2.3346	0.6099	1.2817	0.9123	0.2876	-0.0616	-1.5704	6.2728	-23.561
56.765	1.5141	0.0622	1.5456	0.0182	0.1598	-0.0107	0.5234	1.7211	-5.1093		56.765	-0.0878	-3.0677	1.3831	0.0094	-0.5153	-0.0421	2.3	1.8493	2.1494		56.75	-0.4785	0.01	8.5059	-0.0291	-0.0383	7.3692	1.7924	1.4647	-0.3912		56.766	2.2304	0.5969	1.2882	0.851	0.2979	-0.0372	-1.1897	5.5035	-24.1962
56.828	1.5011	0.0883	1.5521	0.0059	0.1476	-0.0107	0.7138	2.4263	-5.3815		56.828	-0.1008	-2.9634	1.3896	0.0199	-0.4311	-0.0372	2.5538	1.4647	1.9679		56.812	-0.4655	0.0231	8.4799	-0.0204	-0.0155	7.1952	2.6173	1.2723	-0.9356		56.828	2.1653	0.5969	1.2882	0.7624	0.2842	-0.0324	-1.3166	4.8624	-24.1962
56.89	1.5011	0.0752	1.5456	0.0094	0.1405	-0.0203	1.1579	1.9775	-5.4722		56.89	-0.1008	-2.8721	1.3896	0.0059	-0.396	-0.0493	3.3787	1.7852	1.7865		56.875	-0.4915	0.0361	8.4279	-0.0221	-0.0068	7.0744	1.729	1.1441	-0.5726		56.891	2.0871	0.5969	1.2882	0.684	0.3254	-0.0543	-1.8242	5.1188	-24.1054
56.953	1.475	0.0491	1.5521	-0.0519	0.1598	-0.0324	1.0945	2.9392	-5.8352		56.953	-0.1268	-2.7939	1.4091	-0.0011	-0.4136	-0.0493	2.0462	0.9518	1.1513		56.937	-0.4785	0.0491	8.3954	0.0129	-0.0383	6.8811	1.8559	1.0159	-0.8448		56.953	2.022	0.5838	1.3012	0.5716	0.2979	-0.047	-1.1262	6.2087	-24.3776
57.015	1.3839	0.0231	1.5716	-0.2131	0.0967	0.0014	0.9041	3.6443	-5.6537		57.015	-0.1268	-2.7026	1.3961	-0.0116	-0.382	-0.0517	2.1731	1.7211	1.6957		57	-0.4915	0.0231	8.3564	-0.0116	-0.0033	6.7071	2.3635	0.7595	-1.9336		57.016	1.9569	0.5969	1.3012	0.4966	0.2945	-0.0591	-1.9511	6.0163	-23.8332
57.078	1.3057	0.0231	1.5781	-0.1395	0.1423	0.0014	0.7138	2.5545	-6.1981		57.078	-0.0878	-2.6113	1.4221	0.0129	-0.3399	-0.0445	1.7924	1.5929	2.1494		57.062	-0.5176	0.0491	8.3174	-0.0344	-0.005	6.5838	2.1097	1.4006	-1.0263		57.078	1.8657	0.623	1.3207	0.4336	0.31	-0.0421	-1.8242	6.1446	-24.1962
57.14	1.2146	0.0231	1.5846	-0.122	0.1598	-0.0203	0.1427	2.234	-6.4703		57.14	-0.0878	-2.5852	1.4091	-0.0169	-0.3066	-0.0469	1.8559	1.7852	1.6957		57.125	-0.4655	0.0361	8.298	-0.0186	0.0143	6.4171	1.6655	0.9518	-0.9356		57.141	1.8137	0.5969	1.3142	0.3535	0.3426	-0.0567	-1.1897	6.1446	-25.3757
57.203	1.1495	-0.003	1.5911	-0.0695	0.1388	-0.0276	0.2062	0.7595	-5.563		57.203	-0.1008	-2.4809	1.4156	-0.0221	-0.2032	-0.0445	1.9828	1.0159	2.6938		57.187	-0.4785	0.0361	8.246	-0.0134	0.0125	6.318	2.4904	0.7595	-0.8448		57.203	1.7225	0.6099	1.3142	0.3331	0.3288	-0.0664	-1.5704	6.1446	-24.8313
57.265	1.0192	0.01	1.5911	-0.0607	0.1546	0.0038	0.3965	0.9518	-6.1981		57.265	-0.1008	-2.4026	1.4091	0.0059	-0.1541	-0.0662	2.6173	1.2723	2.2401		57.25	-0.5436	0.0752	8.194	0.0147	0.0336	6.1803	2.998	0.8877	-1.2078		57.266	1.6313	0.5969	1.3142	0.3007	0.2859	-0.0397	-2.0145	5.824	-25.0128
57.328	0.9541	-0.0161	1.5846	-0.1273	0.1686	-0.03	0.9041	2.1057	-5.4722		57.328	-0.1399	-2.2722	1.4156	-0.0186	-0.0909	-0.0517	2.4904	1.4006	1.6957		57.312	-0.5045	0.01	8.168	-0.0064	0.0055	6.0329	2.4269	0.6954	-1.9336		57.328	1.5792	0.6099	1.3142	0.2956	0.2945	-0.0494	-1.4435	5.5035	-24.8313
57.39	0.8629	-0.0161	1.5781	-0.094	0.1563	-0.0083	0.3965	1.5929	-6.8332		57.39	-0.1399	-2.194	1.4416	-0.0064	-0.0646	-0.0469	2.6807	1.3365	0.9699		57.375	-0.4915	0.0361	8.1225	-0.0256	0.0178	5.9169	2.6807	1.2082	-2.2058		57.391	1.5271	0.623	1.3142	0.4625	0.2979	-0.03	-1.1262	3.7726	-25.285
57.453	0.7978	-0.0161	1.5846	-0.1045	0.1598	-0.0058	1.4117	1.5929	-7.1054		57.453	-0.1529	-2.1418	1.4416	-0.0169	-0.0401	-0.0542	1.9828	1.7852	2.6031		57.437	-0.4655	0.01	8.09	-0.0081	0.0388	5.7477	1.729	1.1441	-1.2078		57.453	1.5271	0.6099	1.3077	0.4012	0.3288	-0.0445	-1.6973	4.606	-25.5572
57.515	0.7457	-0.0161	1.5716	-0.2727	0.1563	-0.0083	0.9676	3.0674	-7.1962		57.515	-0.1399	-2.0505	1.4416	-0.0221	0.0073	-0.0566	2.7442	1.1441	1.3328		57.5	-0.4655	0.0231	8.051	-0.0309	0.0406	5.6318	2.3	0.9518	-1.3892
57.578	0.6806	-0.0291	1.6041	-0.2675	0.13	-0.0155	0.9676	2.8109	-7.6498		57.578	-0.1399	-1.9853	1.4481	-0.0169	0.0195	-0.0445	2.7442	1.5288	2.4216		57.562	-0.4655	0.0491	8.0185	-0.0151	0.0494	5.5085	2.7442	1.4006	-0.6634
57.64	0.6025	-0.0161	1.6236	-0.2973	0.1826	-0.0083	0.8407	2.5545	-7.922		57.64	-0.1529	-1.9071	1.4741	-0.0274	0.0967	-0.0517	2.6173	1.4006	3.0567		57.625	-0.4655	0.0361	7.973	-0.0362	0.0458	5.3273	1.9828	1.1441	-1.8429
57.703	0.5374	-0.0422	1.6106	-0.2009	0.1405	-0.0155	-0.3648	2.6186	-7.8313		57.703	-0.1399	-1.8158	1.4676	-0.0309	0.1458	-0.059	2.6173	1.5288	2.0587		57.687	-0.4785	0.0622	7.934	-0.0379	0.0266	5.2403	1.2848	1.2082	-1.48
57.765	0.4071	-0.0291	1.6171	-0.1869	0.1265	-0.0155	1.0945	1.0159	-8.7386		57.765	-0.1529	-1.7506	1.4871	-0.0134	0.1388	-0.0614	2.3	1.7211	0.7884		57.75	-0.4785	0.0491	7.895	-0.0064	0.0336	5.0881	1.5386	0.5672	-1.5707
57.828	0.329	-0.0291	1.5911	-0.1746	0.1318	0.0014	0.1427	0.5672	-8.0128		57.828	-0.1659	-1.6723	1.5001	-0.0081	0.1405	-0.0638	2.5538	1.2082	0.4255		57.812	-0.4915	0.0361	7.8495	-0.0256	0.0178	5.0131	1.5386	0.3107	-1.8429
57.89	0.2378	-0.0291	1.5846	-0.2149	0.13	-0.001	-0.1745	1.7852	-8.8294		57.89	-0.1399	-1.568	1.4871	-0.0011	0.0949	-0.03	2.2366	1.4006	0.1533		57.875	-0.5176	0.0231	7.804	-0.0642	0.0248	4.8585	1.7924	1.2082	-1.2985
57.953	0.1336	-0.0422	1.5911	-0.3078	0.1142	-0.03	0.5869	3.0674	-7.3776		57.953	-0.1268	-1.5158	1.5326	0.0129	0.1476	-0.0493	1.4117	1.4647	0.5162		57.937	-0.4915	0.0491	7.7455	-0.0449	0.0546	4.7352	2.4904	1.4006	-1.0263
58.015	0.0946	-0.0422	1.5976	-0.3691	0.1265	-0.0155	1.031	3.3879	-8.0128		58.015	-0.1789	-1.3854	1.5196	-0.0064	0.1598	-0.0517	2.6807	1.2082	-0.3004		58	-0.4785	0.0491	7.7196	-0.0414	0.0581	4.6048	1.7924	0.6954	-1.6614
58.078	-0.0096	-0.0552	1.5911	-0.3551	0.1405	-0.0107	0.0793	3.0674	-8.7386		58.078	-0.1399	-1.3593	1.5326	-0.0309	0.1774	-0.0662	1.8559	0.8877	0.5162		58.062	-0.4655	0.0231	7.6741	-0.0291	0.0564	4.4815	1.4752	1.0159	-1.6614
58.14	-0.0878	-0.0291	1.5976	-0.3235	0.13	0.0014	1.0945	2.0416	-9.3738		58.14	-0.1529	-1.2289	1.5261	-0.0099	0.2405	-0.0542	2.6173	1.9134	0.8791		58.125	-0.4785	0.0622	7.6416	-0.0327	0.0564	4.3873	1.2848	0.4389	-2.0244
58.203	-0.1789	-0.0552	1.5976	-0.3113	0.1318	-0.0131	-0.1111	1.8493	-10.0089		58.203	-0.1268	-1.1767	1.5326	-0.0362	0.3475	-0.0493	2.9345	1.8493	1.1513		58.187	-0.4785	0.0361	7.5896	-0.0239	0.0546	4.31	1.9193	1.08	-1.2985
58.265	-0.2831	-0.0291	1.5781	-0.3095	0.0844	-0.0131	0.2062	1.2723	-9.646		58.265	-0.1399	-1.0594	1.5456	-0.0449	0.3317	-0.0445	2.4904	1.4006	1.4235		58.25	-0.4655	0.0231	7.5506	-0.0379	0.0511	4.1553	1.5386	0.8236	-2.0244
58.328	-0.3352	-0.0291	1.5781	-0.313	0.1265	-0.0058	1.1579	1.9775	-10.0089		58.328	-0.1659	-0.9811	1.5456	-0.0081	0.3895	-0.0324	2.6173	1.2723	1.9679		58.312	-0.4655	-0.003	7.4791	-0.0327	0.0458	4.0925	2.4904	0.6313	-1.7522
58.39	-0.4264	-0.0552	1.5716	-0.3761	0.0985	-0.0107	0.3331	2.2981	-10.3718		58.39	-0.1399	-0.929	1.5456	-0.0046	0.3895	-0.0517	2.4904	1.4006	2.2401		58.375	-0.4524	0.0361	7.4661	-0.0186	0.0599	4.0006	2.0462	0.5672	-1.7522
58.453	-0.4785	-0.0552	1.5716	-0.4164	0.1142	-0.03	1.2214	2.8109	-9.646		58.453	-0.1399	-0.8507	1.5521	-0.0309	0.3702	-0.0421	1.4117	1.2082	2.966		58.437	-0.4655	0.0231	7.4141	-0.0344	0.0757	3.9209	2.1097	0.2466	-1.8429
58.515	-0.5696	-0.0291	1.5651	-0.4444	0.1212	-0.0155	1.1579	3.0033	-10.4626		58.515	-0.192	-0.7594	1.5651	-0.0327	0.386	-0.059	1.4117	1.2082	2.6031		58.5	-0.4394	0.0622	7.3816	-0.0484	0.0581	3.7977	1.031	0.3107	-2.2966
58.578	-0.6608	-0.0552	1.5651	-0.4742	0.0949	-0.0058	0.7772	2.7468	-10.0089		58.578	-0.1529	-0.6681	1.5716	-0.0414	0.4053	-0.0517	1.6655	1.7211	2.2401		58.562	-0.4915	0.0622	7.3556	-0.0274	0.0792	3.7034	1.2848	0.0543	-2.2966
58.64	-0.7259	-0.0813	1.5586	-0.4953	0.102	-0.0155	1.031	2.7468	-9.5552		58.64	-0.1529	-0.5768	1.5846	-0.0046	0.4246	-0.0566	2.6173	1.1441	2.7845		58.625	-0.4524	0.0491	7.3101	-0.0379	0.0827	3.6092	2.1097	0.7595	-2.3873
58.703	-0.8171	-0.0291	1.5391	-0.4655	0.1142	-0.0421	0.46	2.1699	-10.0089		58.703	-0.1659	-0.5116	1.5911	-0.0256	0.4737	-0.0445	2.3635	1.7852	2.966		58.687	-0.4524	0.0361	7.2646	-0.0204	0.0897	3.5439	2.6173	0.3748	-2.5688
58.765	-0.8692	-0.0682	1.5261	-0.4672	0.0809	0.0038	0.3331	2.0416	-9.4645		58.765	-0.1659	-0.3943	1.5976	-0.0221	0.4807	-0.059	2.2366	1.7852	3.5104		58.75	-0.4524	0.0491	7.2386	-0.0414	0.0827	3.4545	1.9828	0.6313	-2.6595
58.828	-0.9864	-0.0552	1.5066	-0.4883	0.102	-0.001	0.8407	1.7852	-9.7367		58.828	-0.1529	-0.3551	1.6041	0.0041	0.5772	-0.0542	3.0614	1.5929	1.9679		58.812	-0.4394	0.01	7.1996	-0.0239	0.0616	3.37	1.0945	0.6313	-2.1151
58.89	-1.0776	-0.0552	1.5066	-0.518	0.1037	-0.0203	1.4117	2.3622	-10.1904		58.89	-0.1399	-0.2639	1.6171	-0.0221	0.635	-0.0469	2.5538	1.3365	2.8753		58.875	-0.4655	0.0491	7.1541	-0.0519	0.0827	3.3047	0.5234	-0.0739	-1.3892
58.953	-1.1166	-0.0422	1.4871	-0.5706	0.0862	-0.0276	0.2696	2.875	-9.8274		58.953	-0.1659	-0.1726	1.6366	-0.0046	0.6596	-0.0638	2.8711	1.7852	4.5085		58.937	-0.4524	0.0622	7.1152	-0.0642	0.0914	3.2105	1.2848	0.8236	-1.48
59.015	-1.2078	-0.0422	1.4806	-0.6512	0.0897	-0.0276	0.3965	2.875	-10.1904		59.015	-0.1659	-0.1074	1.6496	-0.0397	0.7297	-0.059	2.998	1.2723	3.6011		59	-0.4394	0.0231	7.0762	-0.0169	0.0721	3.1597	1.2848	0.4389	-2.2966
59.078	-1.299	-0.0813	1.4806	-0.695	0.0879	-0.0107	0.5869	2.9392	-10.3718		59.078	-0.1399	-0.0291	1.6561	-0.0274	0.7139	-0.0493	2.6807	1.8493	3.5104		59.062	-0.4264	0.0231	7.0437	-0.0327	0.0774	3.0727	1.4117	0.5672	-2.1151
59.14	-1.3641	-0.0291	1.4546	-0.7055	0.0599	-0.0034	0.3331	2.8109	-9.7367		59.14	-0.1399	0.0491	1.6496	-0.0221	0.7332	-0.0493	2.3635	1.4006	3.3289		59.125	-0.4003	0.0231	6.9982	-0.0467	0.0739	3.0172	1.031	0.5672	-2.2058
59.203	-1.4552	-0.0552	1.4481	-0.7318	0.0897	-0.0058	0.5869	2.8109	-10.4626		59.203	-0.1399	0.1143	1.6821	-0.0239	0.7665	-0.0687	2.4904	1.4006	4.1455		59.187	-0.3873	0.0361	6.9657	-0.0607	0.0774	2.9157	1.0945	0.8877	-2.5688
59.265	-1.5464	-0.0422	1.4351	-0.7458	0.0441	-0.0228	0.5234	2.875	-10.8255		59.265	-0.1529	0.2317	1.6756	-0.0169	0.8227	-0.0542	2.998	1.5288	3.2382		59.25	-0.4264	0.0361	6.9137	-0.0519	0.0897	2.8697	1.2848	0.3107	-2.6595
59.328	-1.6115	-0.0422	1.4221	-0.7704	0.0441	-0.0203	0.6503	2.3622	-11.1884		59.328	-0.1399	0.2969	1.6821	-0.0256	0.8349	-0.0614	2.9345	1.7211	3.8733		59.312	-0.4003	0.0491	6.8812	-0.0519	0.0967	2.7683	1.1579	0.5672	-2.0244
59.39	-1.6897	-0.0682	1.4091	-0.8475	0.0827	0.0038	1.031	2.6186	-10.9162		59.39	-0.1529	0.3752	1.6626	-0.0099	0.8963	-0.059	2.6807	1.3365	4.5085		59.375	-0.4003	0.0361	6.8292	-0.0537	0.0985	2.7296	1.2848	0.1825	-2.5688
59.453	-1.7418	-0.0422	1.3961	-0.8895	0.0511	-0.0348	0.6503	2.7468	-10.3718		59.453	-0.1529	0.4143	1.6821	-0.0467	0.9226	-0.0566	1.9193	1.8493	4.0548		59.437	-0.3743	0.0361	6.7772	-0.0537	0.0914	2.6378	1.6655	1.08	-2.3873
59.515	-1.8329	-0.0291	1.3896	-0.9158	0.0599	-0.0252	0.2062	2.5545	-10.9162		59.515	-0.1268	0.5056	1.6821	-0.0221	0.9331	-0.0517	2.5538	2.1057	3.6919		59.5	-0.3743	0.0622	6.7512	-0.0362	0.0949	2.5459	1.0945	0.1184	-2.7502
59.578	-1.9111	-0.0291	1.3701	-0.9877	0.0581	-0.0131	0.3331	2.6827	-10.7348		59.578	-0.1268	0.5969	1.6886	-0.0064	0.9945	-0.0445	3.3787	1.2723	3.8733		59.562	-0.4003	0.0231	6.7122	-0.0397	0.0879	2.4589	0.5869	0.6313	-2.841
59.64	-2.0022	-0.0291	1.3636	-0.9754	0.0423	-0.001	0.46	2.6827	-10.2811		59.64	-0.1399	0.6882	1.6886	-0.0256	1.0454	-0.059	3.1249	0.6313	4.5085		59.625	-0.4003	0.0231	6.6602	-0.0519	0.0967	2.4058	0.46	0.6313	-1.8429
59.703	-2.0673	-0.0422	1.3571	-1.042	0.0634	-0.001	0.7772	2.7468	-11.2792		59.703	-0.1529	0.7794	1.6886	-0.0186	1.0383	-0.0493	3.2518	1.657	3.8733		59.687	-0.3482	0.0231	6.6147	-0.0151	0.0739	2.3381	0.6503	0.4389	-2.3873
59.765	-2.1455	-0.0552	1.3311	-1.1103	0.0336	-0.0034	0.0158	2.875	-10.7348		59.765	-0.1399	0.8447	1.6821	-0.0291	1.0945	-0.0445	3.4421	1.3365	4.0548		59.75	-0.3743	0.01	6.5757	-0.0327	0.0985	2.2608	0.46	0.503	-2.3873
59.828	-2.2627	-0.0552	1.3311	-1.1769	0.0336	0.0038	0.9676	3.0674	-11.4606		59.828	-0.1268	0.9099	1.7016	-0.0554	1.1523	-0.0517	3.2518	1.2723	4.1455		59.812	-0.3873	0.0231	6.5303	-0.0432	0.0949	2.1956	0.7138	0.8877	-2.2966
59.89	-2.3408	-0.0552	1.3051	-1.2085	0.0301	-0.03	0.2062	2.9392	-10.8255		59.89	-0.1399	0.9751	1.6951	-0.0344	1.1523	-0.0421	2.5538	1.5929	4.327		59.875	-0.3352	0.0491	6.4913	-0.0291	0.0879	2.14	1.2214	-0.0098	-3.1132
59.953	-2.419	-0.0552	1.3051	-1.2558	-0.0068	-0.0276	0.3331	2.8109	-11.6421		59.953	-0.1399	1.0664	1.7016	-0.0379	1.1418	-0.0397	2.2366	1.4006	4.327		59.937	-0.3613	0.0361	6.4458	-0.0467	0.1055	2.0989	0.9676	1.0159	-2.9317
60.015	-2.4971	-0.0552	1.2791	-1.3083	0.0213	-0.0083	1.2214	2.8109	-10.8255		60.015	-0.1399	1.1446	1.7016	-0.0554	1.1348	-0.0542	1.7924	1.3365	3.9641		60	-0.3613	0.0231	6.4068	-0.0291	0.102	2.0651	0.8407	0.3748	-3.3854
60.078	-2.5622	-0.0291	1.2791	-1.4222	-0.0155	0.0062	0.8407	3.7084	-11.4606		60.078	-0.1399	1.262	1.7016	-0.0309	1.1593	-0.0662	1.729	1.2723	4.1455		60.062	-0.3613	0.0231	6.3613	-0.0397	0.0844	1.9926	1.0945	0.7595	-3.3854
60.14	-2.6274	-0.0682	1.2661	-1.4836	-0.0208	-0.0228	0.3965	3.5161	-11.6421		60.14	-0.1529	1.3141	1.6886	-0.0607	1.2067	-0.0566	2.4904	1.5288	3.9641		60.125	-0.3092	0.01	6.3418	-0.0379	0.0792	1.937	0.3331	0.7595	-3.839
60.203	-2.7185	-0.0552	1.2661	-1.5309	-0.0015	-0.001	1.2848	3.5161	-11.0977		60.203	-0.1268	1.4054	1.7081	-0.0362	1.3084	-0.0638	2.9345	1.2082	4.0548		60.187	-0.3482	0.01	6.3028	-0.0327	0.109	1.8838	0.8407	0.1184	-3.2039
60.265	-2.7836	-0.0552	1.2466	-1.5712	-0.0243	-0.0058	0.3331	2.9392	-11.7328		60.265	-0.1529	1.4837	1.7016	-0.0099	1.3207	-0.0421	2.998	1.1441	3.8733		60.25	-0.3352	0.01	6.2638	-0.0554	0.1037	1.8186	0.5234	0.6954	-3.4761
60.328	-2.8748	-0.0422	1.2336	-1.5975	-0.005	-0.0034	1.031	2.875	-11.4606		60.328	-0.1268	1.5489	1.6951	-0.0344	1.3768	-0.0542	3.1883	1.2082	4.2363		60.312	-0.3482	0.01	6.2183	-0.0519	0.1072	1.7558	0.5234	0.5672	-3.0224
60.39	-2.9399	-0.0552	1.2141	-1.6536	-0.0155	0.0087	1.0945	2.6827	-11.0977		60.39	-0.1399	1.6402	1.6821	-0.0344	1.4083	-0.0397	2.5538	1.3365	4.8714		60.375	-0.3613	0.0231	6.1728	-0.0274	0.0932	1.7171	0.3965	0.6954	-4.2927
60.453	-3.0181	-0.0552	1.2076	-1.8043	-0.026	-0.0034	1.1579	3.0033	-11.8236		60.453	-0.1138	1.7184	1.6886	-0.0432	1.4346	-0.0614	2.2366	0.7595	4.1455		60.437	-0.3222	0.0361	6.1078	-0.0449	0.1037	1.6615	0.7772	0.9518	-4.202
60.515	-3.0832	-0.0552	1.1947	-1.8901	-0.0664	-0.0058	0.8407	2.9392	-12.6402		60.515	-0.1268	1.8227	1.6886	-0.0379	1.468	-0.0542	2.7442	0.7595	3.5104		60.5	-0.3222	-0.003	6.0948	-0.0397	0.0844	1.6374	0.2062	0.503	-4.5649
60.578	-3.1483	-0.0552	1.1882	-1.9953	-0.0559	-0.0131	1.6655	3.6443	-12.4587		60.578	-0.1529	1.901	1.7016	-0.0116	1.596	-0.0638	2.998	1.0159	4.5992		60.562	-0.3222	0.01	6.0688	-0.0379	0.0967	1.5673	0.2696	0.8236	-3.9298
60.64	-3.2525	-0.0682	1.1817	-2.0391	-0.0857	-0.0034	1.2848	3.6443	-12.9124		60.64	-0.1268	1.9662	1.6951	-0.0484	1.6363	-0.0759	2.9345	1.2082	4.8714		60.625	-0.3222	-0.003	6.0298	-0.0362	0.0914	1.5069	0.3965	0.8236	-3.7483
60.703	-3.3176	-0.0682	1.1752	-2.1249	-0.0944	0.0135	1.8559	3.0674	-13.0939		60.703	-0.1659	2.0575	1.6821	-0.0204	1.6924	-0.0638	2.8711	0.8877	3.4197		60.687	-0.2962	-0.003	5.9778	-0.0379	0.0967	1.4851	0.3331	0.503	-4.3834
60.765	-3.4088	-0.0552	1.1687	-2.1389	-0.0874	0.0038	0.9041	3.2597	-12.9124		60.765	-0.1789	2.1357	1.6951	-0.0414	1.7415	-0.0517	2.8711	1.2723	4.1455		60.75	-0.3222	0.01	5.9389	-0.0519	0.1072	1.4368	0.9676	0.7595	-4.202
60.828	-3.4869	-0.0422	1.1622	-2.2721	-0.14	-0.0131	1.3483	3.0674	-12.4587		60.828	-0.1399	2.214	1.6886	-0.0554	1.8187	-0.0542	2.8076	1.3365	4.1455		60.812	-0.3092	-0.0161	5.9129	-0.0362	0.1055	1.386	0.7138	0.6313	-4.1112
60.89	-3.552	-0.0682	1.1622	-2.3913	-0.1085	-0.001	1.2214	3.452	-12.4587		60.89	-0.1399	2.2792	1.7016	-0.0537	1.8415	-0.0735	2.4904	0.7595	4.327		60.875	-0.3092	-0.0291	5.8674	-0.0291	0.109	1.3522	0.3331	0.503	-4.1112
60.953	-3.6041	-0.0552	1.1557	-2.4806	-0.0822	0.0038	1.5386	3.7726	-12.8217		60.953	-0.1399	2.3574	1.6951	-0.0204	1.9204	-0.0614	2.9345	0.9518	4.6899		60.937	-0.2441	-0.003	5.8089	-0.0256	0.1195	1.2966	0.2696	0.9518	-3.2946
61.015	-3.6692	-0.0422	1.1492	-2.5928	-0.0927	-0.0058	1.6021	3.8367	-12.8217		61.015	-0.1399	2.4487	1.7016	-0.0414	1.966	-0.0542	3.3152	1.2082	4.5085		61	-0.2701	-0.0813	5.8089	-0.0659	0.0967	1.2652	0.6503	1.3365	-4.0205
61.078	-3.7474	-0.0552	1.1492	-2.6927	-0.1015	-0.0058	1.4117	3.7726	-12.1865		61.078	-0.1529	2.54	1.7016	-0.0432	2.1045	-0.0542	3.1249	1.2723	4.4177		61.062	-0.2962	-0.0422	5.7374	-0.0502	0.109	1.2096	0.2062	0.8877	-4.202
61.14	-3.8385	-0.0422	1.1492	-2.7382	-0.0979	0.0062	1.2848	3.0033	-13.5475		61.14	-0.1529	2.6183	1.7081	-0.0397	2.2202	-0.0687	3.3152	0.5672	4.7807		61.125	-0.2701	0.0231	5.6854	-0.0221	0.109	1.1806	0.0793	1.0159	-3.839
61.203	-3.8906	-0.0552	1.1427	-2.8048	-0.1225	0.0014	1.9828	2.8109	-13.2753		61.203	-0.1399	2.6965	1.6951	-0.0186	2.2904	-0.0493	3.8228	0.6954	4.6899		61.187	-0.2701	-0.0161	5.6464	-0.0344	0.1212	1.1541	0.7772	0.9518	-3.839
61.265	-3.9688	-0.0291	1.1362	-2.9257	-0.1137	-0.0107	0.9041	3.2597	-12.9124		61.265	-0.1399	2.7617	1.7081	-0.0362	2.343	-0.0735	3.6325	0.7595	3.9641		61.25	-0.2701	-0.0422	5.6009	-0.0134	0.1353	1.0912	0.8407	0.1184	-4.3834
61.328	-4.0599	-0.0552	1.1427	-3.0834	-0.1207	-0.0058	0.9676	4.2213	-13.1846		61.328	-0.1268	2.866	1.6951	-0.0467	2.4271	-0.059	3.3787	0.7595	4.6899		61.312	-0.2831	-0.0552	5.5619	-0.0274	0.1423	1.0695	1.0945	0.503	-4.7464
61.39	-4.112	-0.0422	1.1297	-3.2254	-0.1155	0.0014	0.9041	4.2854	-13.5475		61.39	-0.1529	2.9313	1.7081	-0.0309	2.5306	-0.0638	4.1401	0.503	4.2363		61.375	-0.2962	-0.0291	5.5294	-0.0256	0.1265	0.9922	0.3331	0.503	-4.2927
61.453	-4.2032	-0.0422	1.1297	-3.334	-0.0909	0.0014	0.7138	4.7342	-13.6383		61.453	-0.1659	3.0095	1.6886	-0.0309	2.5902	-0.0735	2.6807	0.4389	4.9621		61.437	-0.2701	-0.0291	5.4839	-0.0344	0.1107	0.9704	0.9676	0.8877	-4.4742
61.515	-4.2683	-0.0291	1.1167	-3.4181	-0.126	-0.0107	1.6655	3.1315	-13.6383		61.515	-0.1529	3.0747	1.7146	-0.0642	2.7042	-0.0493	3.6325	0.8877	5.0529		61.5	-0.2831	-0.0291	5.4579	-0.0099	0.1177	0.9221	-0.0476	0.6313	-4.5649
61.578	-4.3855	-0.0552	1.1362	-3.4812	-0.105	-0.0058	1.2848	4.029	-13.3661		61.578	-0.1268	3.153	1.7081	-0.0449	2.7936	-0.0662	3.3152	0.6954	4.8714		61.562	-0.2831	-0.0422	5.3994	-0.0239	0.1142	0.9028	0.6503	1.3365	-4.3834
61.64	-4.4246	-0.0291	1.1297	-3.6021	-0.1032	0.0014	1.2214	3.5802	-12.6402		61.64	-0.1529	3.2442	1.7211	-0.0695	2.8708	-0.0735	3.5056	1.0159	4.1455		61.625	-0.2962	-0.0682	5.3475	-0.0291	0.116	0.8786	0.7138	0.6313	-5.0186
61.703	-4.5158	-0.0291	1.1362	-3.702	-0.0839	0.0087	2.3	4.2854	-14.0012		61.703	-0.1399	3.3355	1.7146	-0.0537	3.0163	-0.0614	4.3304	0.6954	4.5992		61.687	-0.2571	-0.0552	5.341	-0.0046	0.13	0.8327	0.3331	0.8877	-4.0205
61.765	-4.5418	-0.0291	1.1297	-3.9176	-0.1032	0.0038	1.5386	5.3111	-13.0939		61.765	-0.1399	3.3877	1.7081	-0.0607	3.1496	-0.0542	3.8228	0.4389	4.1455		61.75	-0.2441	-0.0552	5.2825	-0.0239	0.1002	0.7916	0.2696	0.1825	-4.8371
61.828	-4.6069	-0.003	1.1362	-4.056	-0.1505	-0.0058	0.6503	5.4394	-14.0919		61.828	-0.1399	3.4659	1.7211	-0.0747	3.2092	-0.0542	3.6959	1.2082	4.5992		61.812	-0.2831	-0.0422	5.2435	-0.0344	0.1212	0.7457	0.1427	0.4389	-4.5649
61.89	-4.7111	-0.0291	1.1297	-4.24	-0.1137	0.0038	1.729	5.247	-13.9105		61.89	-0.1399	3.5442	1.7341	-0.0484	3.3022	-0.059	3.4421	1.4006	4.6899		61.875	-0.2701	-0.0552	5.198	-0.0169	0.1212	0.7481	0.7772	0.4389	-5.0186
61.953	-4.7762	-0.0161	1.1297	-4.2873	-0.1155	-0.0083	0.8407	5.3753	-14.3641		61.953	-0.1138	3.5964	1.7211	-0.0467	3.4582	-0.0517	3.3152	0.6313	4.1455		61.937	-0.2962	-0.0291	5.159	-0.0239	0.0967	0.707	0.3965	0.8236	-4.3834
62.015	-4.8413	-0.0422	1.1427	-4.3556	-0.1278	-0.0131	2.0462	3.7726	-14.6363		62.015	-0.1008	3.6876	1.7341	-0.0554	3.6143	-0.0662	3.9497	1.3365	4.7807		62	-0.231	-0.0682	5.146	-0.0239	0.1107	0.678	0.0793	0.7595	-4.5649
62.078	-4.9325	-0.0291	1.1362	-4.4748	-0.1207	-0.001	2.1097	3.7084	-14.9085		62.078	-0.0617	3.7659	1.7406	-0.0449	3.709	-0.059	3.1883	1.3365	5.688		62.062	-0.231	-0.0552	5.0875	-0.0239	0.1423	0.6684	1.0945	0.7595	-5.2
62.14	-5.0107	0.01	1.1232	-4.6658	-0.119	-0.0058	1.6655	4.4136	-14.1827		62.14	-0.0617	3.8441	1.7016	-0.0256	3.8194	-0.0517	3.0614	1.2082	5.5973		62.125	-0.2571	-0.0682	5.0485	-0.0344	0.1142	0.62	0.3331	0.6313	-5.0186
62.203	-5.1018	-0.0422	1.1232	-4.82	-0.1716	-0.0155	1.0945	4.8624	-14.0012		62.203	-0.0617	3.9485	1.7276	-0.0572	3.9387	-0.0638	3.6959	0.8236	5.0529		62.187	-0.2441	-0.0813	4.99	-0.0239	0.1177	0.62	0.9676	1.0159	-5.2908
62.265	-5.1669	-0.0161	1.1427	-5.0338	-0.1015	-0.0131	2.0462	5.4394	-14.5456		62.265	-0.0357	4.0137	1.7276	-0.0362	4.0439	-0.0687	2.998	1.1441	4.2363		62.25	-0.2441	-0.0682	4.9705	-0.0256	0.13	0.5862	0.9041	0.4389	-5.6537
62.328	-5.2321	-0.0161	1.1362	-5.1459	-0.1576	-0.0131	1.031	4.6701	-14.8178		62.328	-0.0487	4.0658	1.7406	-0.0537	4.1807	-0.0662	3.1249	0.7595	4.7807		62.312	-0.218	-0.0422	4.925	-0.0379	0.1353	0.5596	0.2062	1.2723	-6.1074
62.39	-5.3362	0.01	1.1297	-5.2248	-0.1278	-0.0107	1.1579	4.029	-15.1807		62.39	-0.0748	4.1441	1.7471	-0.0642	4.2719	-0.0542	2.6173	0.6313	4.5992		62.375	-0.2571	-0.0552	4.8925	-0.0309	0.1318	0.5403	0.2696	0.9518	-6.2888
62.453	-5.4144	0.01	1.1297	-5.3737	-0.1225	0.0014	1.4117	3.7726	-14.6363		62.453	-0.0617	4.2354	1.7406	-0.0765	4.4034	-0.0638	2.7442	1.1441	5.0529		62.437	-0.2441	-0.1204	4.8405	-0.0327	0.1405	0.5161	1.031	0.6954	-5.6537
62.515	-5.4925	-0.003	1.1362	-5.4806	-0.1733	-0.0083	0.5869	4.3495	-14.5456		62.515	-0.0878	4.3006	1.7406	-0.0379	4.5366	-0.0735	2.5538	0.4389	5.2343		62.5	-0.2441	-0.0682	4.808	-0.0291	0.144	0.5016	0.3331	1.1441	-5.7444
62.578	-5.5707	-0.003	1.1362	-5.7382	-0.1576	0.0038	1.6655	4.9265	-14.0012		62.578	-0.0487	4.418	1.7536	-0.0274	4.6945	-0.0759	5.1552	0.3748	4.5992		62.562	-0.231	-0.0813	4.769	-0.0379	0.1318	0.4702	-0.1111	0.8236	-5.3815
62.64	-5.6358	0.0231	1.1362	-5.9152	-0.1313	-0.0131	1.4117	4.6701	-15.09		62.64	-0.0487	4.4832	1.7341	-0.0467	4.8891	-0.0832	3.8228	0.1825	4.5992		62.625	-0.205	-0.1204	4.7301	-0.0397	0.1405	0.4678	0.2062	1.0159	-5.7444
62.703	-5.7009	0.0231	1.1557	-6.0922	-0.1576	-0.0131	1.031	5.5676	-14.8178		62.703	-0.0878	4.5484	1.7601	-0.0642	4.9452	-0.0832	3.8228	0.6954	4.4177		62.687	-0.218	-0.1074	4.6781	-0.0221	0.1405	0.4267	0.8407	0.6313	-6.3796
62.765	-5.779	0.0491	1.1687	-6.2113	-0.1225	0.0062	1.729	4.606	-15.5437		62.765	-0.0617	4.6136	1.7536	-0.0572	5.11	-0.0711	3.7594	0.503	4.5085		62.75	-0.231	-0.1204	4.6651	-0.0239	0.1318	0.4146	1.0945	0.7595	-6.561
62.828	-5.8311	0.0361	1.1752	-6.32	-0.105	-0.0083	1.031	5.0547	-15.6344		62.828	-0.0487	4.757	1.7406	-0.0502	5.2153	-0.059	4.0132	0.6313	4.9621		62.812	-0.231	-0.0943	4.6001	-0.0204	0.1318	0.3953	1.031	0.6954	-6.0166
62.89	-5.9093	0.01	1.1687	-6.4374	-0.1418	0.0014	2.0462	5.1829	-14.8178		62.89	-0.0357	4.7962	1.7471	-0.0677	5.3836	-0.0687	3.569	0.1825	4.7807		62.875	-0.218	-0.1204	4.5611	-0.0379	0.1248	0.3639	0.3965	0.9518	-5.7444
62.953	-5.9744	0.0231	1.1492	-6.6687	-0.1418	-0.0058	2.0462	4.6701	-14.7271		62.953	-0.0748	4.9005	1.7536	-0.0484	5.6133	-0.0614	3.5056	0.2466	4.8714		62.937	-0.218	-0.1204	4.5091	-0.0204	0.1423	0.376	1.031	0.4389	-6.1981
63.015	-6.0656	0.0622	1.1752	-6.8422	-0.1365	-0.0058	1.031	6.0804	-15.2715		63.015	-0.0617	4.9396	1.7796	-0.0677	5.7343	-0.0783	3.8228	0.4389	4.327		63	-0.218	-0.0943	4.4441	-0.0309	0.1458	0.347	0.2062	1.2723	-5.9259
63.078	-6.1307	0.0231	1.1752	-7.0016	-0.1698	0.0038	1.1579	6.0804	-15.9973		63.078	-0.0487	5.07	1.7536	-0.0905	5.8763	-0.0735	3.1249	0.503	5.5065		63.062	-0.1789	-0.1204	4.4116	-0.0204	0.1388	0.3083	0.2696	0.4389	-5.563
63.14	-6.2218	0.0491	1.1752	-7.1488	-0.1242	-0.0034	1.6021	5.247	-14.9085		63.14	-0.0617	5.0831	1.7471	-0.0712	6.0534	-0.0662	3.7594	0.6313	4.2363		63.125	-0.1268	-0.1074	4.3791	-0.0011	0.144	0.318	0.6503	0.6954	-6.2888
63.203	-6.3	0.0752	1.1817	-7.2943	-0.1681	0.0232	1.9193	5.0547	-15.6344		63.203	-0.0617	5.1222	1.7406	-0.0817	6.2323	-0.0687	4.2035	0.8236	5.0529		63.187	-0.205	-0.0943	4.3401	0.0059	0.123	0.3131	0.2696	0.9518	-6.0166
63.265	-6.3781	0.0752	1.1817	-7.431	-0.1856	0.0135	1.8559	5.1188	-15.3622		63.265	-0.0357	5.2787	1.7536	-0.073	6.3568	-0.0711	3.3787	0.3748	4.5085		63.25	-0.1789	-0.1074	4.3011	-0.0484	0.1177	0.2696	-0.3014	1.4006	-6.561
63.328	-6.4432	0.0622	1.1882	-7.6325	-0.1418	0.0087	1.6655	5.6958	-15.1807		63.328	-0.0357	5.37	1.7601	-0.0712	6.5865	-0.0759	3.6959	1.08	4.8714		63.312	-0.1789	-0.1204	4.2556	-0.0011	0.13	0.2551	0.2062	0.503	-6.7425
63.39	-6.4953	0.0883	1.1882	-7.7394	-0.1961	-0.001	0.9041	5.6958	-15.9066		63.39	0.0034	5.4091	1.7601	-0.0554	6.7215	-0.0904	3.569	0.1825	4.5085		63.375	-0.192	-0.0943	4.2296	-0.0221	0.1055	0.2455	0.3331	0.6313	-5.6537
63.453	-6.5474	0.0491	1.1947	-7.5782	-0.1435	0.0038	1.729	4.0931	-15.1807		63.453	0.0425	5.4743	1.7666	-0.0432	6.9653	-0.0614	4.5208	0.1184	5.1436		63.437	-0.1789	-0.1334	4.2036	-0.0064	0.1283	0.2431	0.3965	1.08	-6.561
63.515	-6.5604	0.0491	1.1882	-7.445	-0.1295	0.0062	1.2848	3.2597	-15.3622		63.515	0.0294	5.5656	1.7731	-0.0589	7.0302	-0.0904	3.4421	0.4389	5.1436		63.5	-0.1529	-0.1334	4.1387	-0.0081	0.137	0.2334	0.8407	1.1441	-6.3796
63.578	-6.5344	0.0883	1.1817	-6.8509	-0.1102	-0.0058	1.031	1.8493	-12.1865		63.578	0.0685	5.6569	1.7731	-0.0554	7.216	-0.0759	3.8228	1.2082	5.0529		63.562	-0.1789	-0.0943	4.0802	-0.0134	0.1072	0.2044	0.1427	0.6954	-6.7425
63.64	-6.4953	0.0883	1.1947	-6.49	-0.0857	-0.0058	0.46	3.3238	-10.3718		63.64	0.0034	5.709	1.7731	-0.0519	7.4229	-0.0807	4.0132	0.7595	4.7807		63.625	-0.1659	-0.1204	4.0672	-0.0081	0.116	0.1778	-0.0476	1.5288	-6.6518
63.703	-6.4302	0.0752	1.1817	-6.3953	-0.0927	-0.0131	2.0462	4.9265	-8.1035		63.703	0.0555	5.8003	1.7796	-0.0624	7.6404	-0.0759	3.8863	1.4006	4.1455		63.687	-0.1789	-0.1334	4.0152	0.0006	0.1212	0.1826	0.7772	0.3107	-7.1962
63.765	-6.326	0.0622	1.1687	-5.9467	-0.0822	0.0014	1.2214	3.452	-7.0147		63.765	0.0555	5.8655	1.7796	-0.0572	7.4808	-0.0977	2.5538	0.5672	3.8733		63.75	-0.1659	-0.1204	3.9892	-0.0221	0.1265	0.173	0.5234	1.4647	-6.924
63.828	-6.2739	0.0622	1.1752	-5.7084	-0.0681	-0.0083	1.2848	1.7211	-6.2888		63.828	0.0425	5.8395	1.7731	-0.0712	7.4563	-0.0856	1.6021	-0.138	4.327		63.812	-0.1789	-0.1204	3.9437	-0.0099	0.1388	0.173	0.9041	0.9518	-7.0147
63.89	-6.2349	0.0752	1.1622	-5.4053	-0.0944	0.0111	1.9193	1.5929	-5.1093		63.89	0.0555	5.8395	1.7861	-0.0256	6.7058	-0.0735	1.7924	0.4389	4.9621		63.875	-0.192	-0.1334	3.9177	-0.0064	0.1142	0.1657	0.2696	0.6954	-6.6518
63.953	-6.1437	0.1013	1.1492	-5.0671	-0.0822	-0.001	0.7772	1.4647	-4.202		63.953	0.0034	5.7873	1.7731	-0.0607	6.1376	-0.0735	0.3331	0.7595	5.0529		63.937	-0.1399	-0.1334	3.8397	-0.0274	0.1212	0.1416	1.2214	1.9134	-6.924
64.015	-6.0525	0.0752	1.1557	-4.8848	-0.0751	-0.001	1.729	2.5545	-4.0205		64.015	0.0555	5.709	1.7861	-0.0554	6.0166	-0.0735	1.7924	1.3365	6.0509		64	-0.1659	-0.1204	3.8202	-0.0046	0.1405	0.1343	0.5869	1.1441	-6.3796
64.078	-5.9874	0.0752	1.1492	-4.7972	-0.0541	0.0062	1.7924	3.3879	-2.2058		64.078	0.0294	5.6308	1.8055	-0.0397	5.5098	-0.0566	2.0462	0.6954	5.1436		64.062	-0.1268	-0.1465	3.7747	-0.0046	0.13	0.1222	0.9676	1.0159	-6.8332
64.14	-5.9223	0.1013	1.1297	-4.5466	-0.0874	0.0062	2.0462	1.5929	-2.3873		64.14	0.0425	5.5656	1.7926	-0.0327	5.0609	-0.0735	0.3331	0.1184	4.5992		64.125	-0.1529	-0.1465	3.7292	-0.0256	0.1195	0.1295	0.3965	1.4647	-7.0147
64.203	-5.8442	0.0752	1.1297	-4.3539	-0.0418	0.0038	2.3635	1.9134	-1.8429		64.203	0.0425	5.4873	1.7926	-0.0414	4.8944	-0.0783	1.5386	0.6954	5.1436		64.187	-0.1399	-0.1465	3.6967	-0.0274	0.1142	0.1102	1.0945	1.4006	-7.1962
64.265	-5.7921	0.0622	1.1232	-4.1313	-0.0331	0.0014	1.7924	1.5929	-1.3892		64.265	0.0685	5.4221	1.7926	-0.0309	4.47	-0.0735	-0.1745	0.8877	5.0529		64.25	-0.1268	-0.1465	3.6447	-0.0116	0.1265	0.0981	1.7924	1.3365	-6.8332
64.328	-5.7139	0.0622	1.1037	-3.9211	-0.0646	0.0038	1.4752	1.0159	-1.3892		64.328	0.0555	5.3439	1.799	-0.0397	4.1701	-0.0662	-0.238	0.9518	5.1436		64.312	-0.1529	-0.1595	3.6447	-0.0397	0.0985	0.0908	0.46	1.0159	-6.2888
64.39	-5.6748	0.0752	1.1102	-3.7581	-0.0488	0.0014	1.8559	1.5288	-1.117		64.39	0.0685	5.3048	1.8055	-0.0221	3.9597	-0.0856	0.5234	0.1825	4.9621		64.375	-0.1138	-0.1726	3.5733	-0.0274	0.1177	0.0642	0.2696	1.3365	-6.1074
64.453	-5.5967	0.0622	1.1037	-3.6249	-0.0383	0.0111	2.1097	1.657	-0.7541		64.453	0.0555	5.1874	1.812	-0.0589	3.8984	-0.0662	2.6807	1.2082	4.7807		64.437	-0.1268	-0.1595	3.5538	-0.0011	0.1195	0.0932	0.6503	1.4647	-6.1981
64.515	-5.4925	0.0883	1.0972	-3.5145	-0.026	0.0135	1.5386	1.4647	-0.0282		64.515	0.0946	5.1222	1.799	-0.0449	3.6178	-0.0735	1.9828	1.7852	5.4158		64.5	-0.1399	-0.1595	3.5083	-0.0291	0.123	0.0642	0.2696	0.9518	-6.7425
64.578	-5.4274	0.0752	1.0842	-3.2902	-0.0225	0.0087	1.9828	0.7595	-0.6634		64.578	0.0815	5.0439	1.799	-0.0221	3.4267	-0.0638	1.2848	0.5672	4.8714		64.562	-0.1008	-0.1726	3.4758	-0.0029	0.1142	0.0618	0.7138	0.8877	-7.8313
64.64	-5.3493	0.0752	1.0842	-3.0729	-0.0331	-0.0131	1.4117	-0.0739	-1.3892		64.64	0.0685	4.9527	1.812	-0.0484	3.1198	-0.0832	-0.1745	1.0159	4.5085		64.625	-0.1399	-0.1334	3.4238	-0.0397	0.1125	0.0473	0.2062	1.1441	-6.4703
64.703	-5.2972	0.1143	1.0712	-2.9415	-0.0524	-0.0083	0.9676	-0.138	-0.3004		64.703	0.1076	4.8353	1.8055	-0.0221	2.9357	-0.0711	-0.6186	0.6954	4.5992		64.687	-0.1138	-0.1595	3.3978	-0.0327	0.1125	0.0497	0.5234	1.3365	-6.8332
64.765	-5.219	0.0622	1.0647	-2.8679	-0.0313	-0.001	1.9193	0.3107	-0.6634		64.765	0.0164	4.7962	1.7926	-0.0449	2.8287	-0.0542	-0.0476	0.8877	4.6899		64.75	-0.1008	-0.1595	3.3588	-0.0309	0.1142	0.0377	0.5869	1.1441	-6.8332
64.828	-5.1409	0.0883	1.0647	-2.747	-0.026	-0.0034	0.6503	1.5929	-0.2097		64.828	0.1076	4.757	1.8185	-0.0309	2.7831	-0.0856	0.3331	1.4006	3.6919		64.812	-0.1268	-0.1204	3.3068	-0.0397	0.1055	0.0425	0.9041	1.2082	-7.2869
64.89	-5.0627	0.0622	1.0647	-2.6243	-0.012	-0.001	1.8559	1.9134	0.6977		64.89	0.0815	4.6397	1.7926	-0.0291	2.6902	-0.0832	1.1579	1.08	4.7807		64.875	-0.0878	-0.1595	3.2678	-0.0344	0.1107	0.0207	1.031	1.4647	-7.2869
64.953	-4.9976	0.0752	1.0647	-2.4877	-0.0155	-0.0131	1.0945	1.0159	-0.2097		64.953	0.0946	4.5484	1.799	-0.0327	2.5429	-0.0566	1.6021	1.2723	3.7826		64.937	-0.1268	-0.1334	3.2288	-0.0204	0.0932	0.0087	1.5386	1.2082	-7.1962
65.015	-4.9195	0.0752	1.0517	-2.3703	-0.0173	-0.0155	1.2848	0.6954	-0.3912		65.015	0.0685	4.5092	1.799	-0.0327	2.4306	-0.0711	0.9676	1.0159	3.9641		65	-0.0878	-0.1856	3.1768	-0.0204	0.0932	0.0062	1.2214	1.657	-7.6498
65.078	-4.8283	0.0883	1.0647	-2.2493	0.0195	-0.0107	0.9676	1.0159	-0.5726		65.078	0.1076	4.444	1.799	-0.0239	2.257	-0.0687	0.46	1.4006	4.1455		65.062	-0.1138	-0.1465	3.1378	0.0006	0.1248	0.0038	0.1427	0.6954	-7.0147
65.14	-4.7762	0.0491	1.0517	-2.1337	0.002	0.0014	1.1579	1.5929	0.6977		65.14	0.0946	4.3267	1.7861	-0.0239	2.0396	-0.0783	-0.9993	1.2082	3.2382		65.125	-0.1138	-0.1595	3.0923	-0.0221	0.116	0.0135	0.8407	1.9134	-7.3776
65.203	-4.7111	0.0361	1.0387	-2.011	-0.0085	-0.0107	1.2214	0.7595	-0.119		65.203	0.0815	4.2484	1.799	-0.0327	1.8871	-0.0783	-1.1262	1.2082	3.1475		65.187	-0.0878	-0.1986	3.0468	-0.0239	0.1142	0.0135	0.9041	1.08	-7.6498
65.265	-4.646	0.0491	1.0517	-1.9182	0.0318	-0.0034	1.2848	1.2082	1.2421		65.265	0.0685	4.1702	1.7666	-0.0397	1.8309	-0.0566	-0.4917	1.2082	2.6031		65.25	-0.0878	-0.1726	2.9883	-0.0291	0.1195	-0.0058	1.4117	1.4647	-7.4684
65.328	-4.5679	0.0622	1.0452	-1.8375	0.0388	-0.001	1.8559	1.1441	-0.119		65.328	0.0946	4.0528	1.7731	-0.0554	1.7871	-0.0662	-0.9993	1.4647	2.966		65.312	-0.0748	-0.1856	2.9624	-0.0327	0.109	-0.0348	1.031	1.9775	-7.0147
65.39	-4.5027	0.0622	1.0582	-1.7517	0.0651	-0.0107	1.729	1.1441	0.6977		65.39	0.0685	3.9876	1.7861	-0.0291	1.7818	-0.0638	0.5869	0.7595	2.7845		65.375	-0.1008	-0.1726	2.9299	-0.0081	0.1195	-0.0155	1.4752	1.5288	-8.1035
65.453	-4.4116	0.0491	1.0517	-1.622	0.0686	0.0062	1.8559	1.1441	0.244		65.453	0.0815	3.9615	1.7861	-0.0362	1.6872	-0.0493	1.2214	1.657	2.5123		65.437	-0.0878	-0.1856	2.8974	-0.0221	0.1125	-0.0228	1.2848	0.6954	-7.4684
65.515	-4.3334	0.0752	1.0452	-1.5344	0.0546	0.0135	1.2848	1.2082	0.5162		65.515	0.0946	3.8572	1.7861	-0.0502	1.5679	-0.0614	0.9041	1.3365	1.9679		65.5	-0.0878	-0.1726	2.8454	-0.0099	0.1142	-0.0372	0.9041	1.2082	-8.1942
65.578	-4.2553	0.0622	1.0582	-1.4222	0.0546	0.0014	1.5386	1.08	0.8791		65.578	0.0685	3.7789	1.7861	-0.0186	1.4592	-0.0735	-0.4283	1.7852	2.5123		65.562	0.0034	-0.1726	2.7739	-0.0309	0.1037	-0.059	0.5234	1.2082	-7.5591
65.64	-4.2032	0.0752	1.0387	-1.3381	0.0616	-0.0131	0.3965	0.1825	0.7884		65.64	0.0946	3.7268	1.7861	-0.0291	1.3119	-0.0759	-1.2531	1.3365	1.9679		65.625	-0.0748	-0.1465	2.7804	-0.0204	0.1212	-0.0445	1.6021	0.8877	-8.1035
65.703	-4.1251	0.0491	1.0452	-1.254	0.0511	-0.0107	0.5234	0.9518	1.4235		65.703	0.0815	3.6224	1.7601	-0.0397	1.2558	-0.059	-0.4283	1.9134	1.3328		65.687	-0.0878	-0.1986	2.7414	-0.0029	0.0967	-0.059	1.4752	1.2723	-8.3757
65.765	-4.0209	0.0231	1.0387	-1.1734	0.0827	-0.0276	0.7772	0.4389	1.4235		65.765	0.0946	3.5312	1.7731	-0.0502	1.2733	-0.0493	0.8407	1.5288	0.8791		65.75	-0.0617	-0.1595	2.6894	0.0059	0.1055	-0.0662	1.2848	0.9518	-8.1035
65.828	-3.9427	0.0231	1.0452	-1.1086	0.0704	-0.0228	0.7772	0.8236	0.5162		65.828	0.0815	3.4659	1.7666	-0.0414	1.247	-0.059	1.1579	1.3365	1.4235		65.812	-0.1008	-0.1726	2.6439	-0.0274	0.1177	-0.0421	1.729	1.2723	-8.4664
65.89	-3.8776	0.0361	1.0452	-1.0192	0.0792	-0.0083	1.2214	0.7595	0.3347		65.89	0.1076	3.4007	1.7666	-0.0572	1.1646	-0.0469	0.3965	0.6954	0.1533		65.875	-0.0487	-0.1856	2.6114	-0.0064	0.1142	-0.0614	0.9676	1.657	-8.4664
65.953	-3.8125	0.0231	1.0452	-1.0122	0.0757	-0.0155	0.8407	1.2723	1.7865		65.953	0.1076	3.2964	1.7666	-0.0116	1.0629	-0.0711	0.0793	1.1441	0.0625		65.937	-0.0487	-0.2117	2.5724	-0.0239	0.1107	-0.0687	0.9676	1.0159	-8.3757
66.015	-3.7213	0.0231	1.0452	-0.9509	0.0949	-0.0131	0.7772	0.9518	1.4235		66.015	0.0946	3.2312	1.7601	-0.0239	1.0015	-0.0493	-0.1745	1.2723	0.1533		66	-0.0748	-0.1856	2.5269	-0.0291	0.109	-0.0807	0.46	1.4006	-8.1035
66.078	-3.6692	0.0231	1.0257	-0.8633	0.0879	-0.0034	1.0945	0.2466	1.9679		66.078	0.1076	3.166	1.7601	-0.0291	0.9051	-0.0711	-0.3014	1.4006	-0.119		66.062	-0.0748	-0.1465	2.4944	-0.0186	0.1055	-0.0952	0.5234	0.6954	-7.5591
66.14	-3.6041	0.0231	1.0452	-0.7669	0.0932	-0.0203	1.0945	0.4389	1.3328		66.14	0.0946	3.0747	1.7471	-0.0484	0.8998	-0.0469	-0.809	1.657	0.244		66.125	-0.0617	-0.1465	2.4489	-0.0029	0.1107	-0.1025	1.2214	0.7595	-8.0128
66.203	-3.4999	0.01	1.0452	-0.6985	0.0774	-0.0131	-0.1111	0.0543	2.1494		66.203	0.1076	2.9834	1.7601	-0.0116	0.9016	-0.0614	1.5386	1.2082	-1.0263		66.187	-0.0748	-0.1856	2.3969	-0.0186	0.102	-0.0904	0.8407	0.7595	-8.1942
66.265	-3.4609	-0.003	1.0387	-0.6355	0.1055	-0.0179	0.6503	0.3107	1.605		66.265	0.1076	2.9052	1.7601	-0.0204	0.8823	-0.0687	1.031	1.08	-1.8429		66.25	-0.0617	-0.1726	2.3515	-0.0081	0.0949	-0.0904	0.3965	0.9518	-8.0128
66.328	-3.3567	-0.003	1.0517	-0.5829	0.116	-0.0372	0.8407	0.7595	1.3328		66.328	0.0946	2.84	1.7666	-0.0186	0.7718	-0.0638	-0.3014	0.8877	-1.9336		66.312	-0.0617	-0.1986	2.3125	-0.0099	0.0897	-0.0711	0.8407	1.0159	-7.7406
66.39	-3.2916	-0.003	1.0517	-0.5636	0.0757	-0.0252	0.5869	0.8877	2.1494		66.39	0.0946	2.7487	1.7536	-0.0221	0.7262	-0.0687	-0.4283	1.1441	-1.7522		66.375	-0.0227	-0.2117	2.28	-0.0397	0.1195	-0.0783	1.4117	0.9518	-7.8313
66.453	-3.1874	0.01	1.0517	-0.5426	0.1142	-0.0131	1.0945	0.8877	1.6957		66.453	0.1076	2.6704	1.7471	-0.0449	0.7245	-0.0469	0.5234	1.08	-2.3873		66.437	-0.0357	-0.1986	2.228	-0.0099	0.1107	-0.0807	0.9676	0.6313	-7.5591
66.515	-3.1222	-0.0291	1.0582	-0.4918	0.102	-0.0179	0.3331	0.7595	2.0587		66.515	0.0946	2.5661	1.7341	-0.0186	0.628	-0.0469	-0.4283	1.9134	-2.5688		66.5	-0.0487	-0.1986	2.202	-0.0081	0.1055	-0.0807	0.3965	0.8236	-8.1035
66.578	-3.0311	-0.003	1.0582	-0.4129	0.1107	-0.0131	0.9676	0.3748	2.0587		66.578	0.1076	2.4879	1.7601	-0.0256	0.6456	-0.0276	0.8407	0.6313	-3.0224		66.562	-0.0487	-0.1986	2.1435	-0.0151	0.123	-0.0928	1.0945	1.5288	-7.4684
66.64	-2.979	-0.0161	1.0712	-0.3796	0.1335	-0.0179	1.1579	0.3107	2.4216		66.64	0.1206	2.4096	1.7406	-0.0029	0.5631	-0.0687	-0.4917	1.08	-3.7483		66.625	-0.0357	-0.2117	2.1045	0.0006	0.1248	-0.0904	1.729	0.6313	-8.3757
66.703	-2.9008	-0.0291	1.0712	-0.3253	0.1037	-0.0228	-0.0476	0.3748	1.7865		66.703	0.1206	2.3574	1.7471	-0.0309	0.5702	-0.0252	1.1579	1.2082	-4.2927		66.687	-0.0487	-0.1986	2.0655	-0.0099	0.1072	-0.0977	0.9041	0.9518	-8.5572
66.765	-2.8227	-0.003	1.0647	-0.2902	0.1072	-0.001	0.3331	0.3748	2.6031		66.765	0.1076	2.2792	1.7146	-0.0221	0.5368	-0.0397	0.0158	1.08	-4.1112		66.75	-0.0748	-0.2247	2.046	-0.0239	0.1072	-0.0904	1.031	1.5929	-7.6498
66.828	-2.7446	-0.0422	1.0712	-0.2605	0.116	-0.0324	0.1427	0.6954	1.8772		66.828	0.1076	2.1879	1.7341	-0.0309	0.472	-0.0662	0.1427	1.08	-5.1093		66.812	-0.0357	-0.2117	1.9875	-0.0134	0.1142	-0.0832	1.4117	0.9518	-8.285
66.89	-2.6794	-0.0552	1.0842	-0.2797	0.1177	-0.0276	-0.1745	0.2466	2.0587		66.89	0.1076	2.1227	1.7341	-0.0151	0.4457	-0.0324	0.3965	1.3365	-4.4742		66.875	-0.0357	-0.1856	1.968	-0.0379	0.1177	-0.0856	1.8559	1.2723	-7.922
66.953	-2.5883	-0.0552	1.0972	-0.2324	0.13	-0.0228	0.9676	0.503	2.2401		66.953	0.0946	1.9923	1.7341	-0.0327	0.4141	-0.0614	-0.1745	1.2723	-4.1112		66.937	-0.0096	-0.2117	1.903	-0.0116	0.0914	-0.1146	0.6503	1.08	-8.285
67.015	-2.5232	-0.0552	1.1102	-0.2166	0.1177	-0.0348	0.7772	0.6954	1.7865		67.015	0.1076	1.9401	1.7341	-0.0414	0.3702	-0.0421	-0.6186	1.7211	-4.8371		67	-0.0357	-0.1986	1.864	-0.0186	0.102	-0.117	1.1579	1.9775	-8.285
67.078	-2.419	-0.0422	1.1102	-0.1588	0.123	-0.0179	-0.3014	0.2466	2.966		67.078	0.1206	1.8358	1.7211	-0.0011	0.379	-0.0542	-0.1745	1.1441	-5.4722		67.062	-0.0357	-0.2117	1.825	-0.0397	0.1055	-0.1146	0.9676	1.1441	-8.4664
67.14	-2.3539	-0.0552	1.1232	-0.122	0.1142	-0.0228	-0.4283	0.3748	2.1494		67.14	0.1336	1.7575	1.7146	-0.0029	0.3527	-0.0638	-0.238	0.8236	-6.0166		67.125	-0.0487	-0.2378	1.7796	-0.0379	0.1142	-0.1049	1.2214	1.4006	-8.0128
67.203	-2.2627	-0.0422	1.1362	-0.0817	0.123	-0.0276	0.2696	0.0543	1.5143		67.203	0.1597	1.6793	1.7081	-0.0186	0.3369	-0.0445	0.3965	0.5672	-6.924		67.187	-0.0227	-0.1986	1.7471	-0.0064	0.1037	-0.1315	0.5869	1.1441	-7.6498
67.265	-2.1846	-0.0552	1.1362	-0.1063	0.1195	-0.0131	0.2062	0.2466	2.5123		67.265	0.1076	1.6141	1.7276	-0.0186	0.2808	-0.0614	-0.4917	1.4647	-6.6518		67.25	-0.0357	-0.2117	1.7016	-0.0221	0.1055	-0.1532	0.2062	1.5288	-8.285
67.328	-2.1194	-0.0552	1.1492	-0.0905	0.1283	-0.0155	0.46	0.2466	1.6957		67.328	0.1076	1.5228	1.7081	-0.0151	0.379	-0.0493	1.4117	0.9518	-7.1962		67.312	-0.0227	-0.1856	1.6626	-0.0256	0.0985	-0.1339	0.9041	1.3365	-8.1942
67.39	-2.0673	-0.0552	1.1622	-0.0887	0.1195	-0.0155	-0.1111	0.4389	2.0587		67.39	0.0946	1.5358	1.7211	-0.0397	0.4877	-0.0638	1.6655	1.3365	-6.3796		67.375	-0.0096	-0.1986	1.6171	-0.0169	0.1177	-0.1218	1.3483	1.1441	-8.1942
67.453	-2.0413	-0.0813	1.1752	-0.0484	0.0967	-0.0155	0.8407	0.3748	3.2382		67.453	0.1076	1.5489	1.7406	-0.0151	0.4807	-0.059	1.6655	1.08	-6.924		67.437	-0.0096	-0.2378	1.5846	-0.0274	0.1072	-0.1387	0.9676	1.1441	-8.285
67.515	-1.9632	-0.0552	1.1687	-0.0572	0.1125	-0.0131	1.4117	0.3107	2.5123													67.5	0.0034	-0.2247	1.5586	-0.0484	0.1072	-0.146	0.9041	1.4647	-7.8313
67.578	-1.9371	-0.0552	1.1817	-0.0695	0.1107	-0.0155	0.2696	0.6954	2.3309													67.562	0.0164	-0.2247	1.5131	-0.0221	0.116	-0.1605	1.4117	1.4647	-8.5572
67.64	-1.885	-0.0682	1.1752	-0.0835	0.1142	-0.0445	0.0793	0.503	2.8753													67.625	-0.0227	-0.1986	1.4611	-0.0169	0.1037	-0.1847	0.7772	1.2082	-7.4684
67.703	-1.872	-0.0552	1.1817	-0.0572	0.123	-0.0252	0.46	0.1184	1.6957													67.687	-0.0096	-0.2247	1.4351	-0.0134	0.1002	-0.1774	0.7772	1.4647	-8.285
67.765	-1.872	-0.0552	1.1947	-0.0397	0.0985	-0.0614	0.6503	0.5672	2.5123													67.75	-0.0487	-0.2117	1.3896	-0.0221	0.109	-0.1702	1.6021	1.2723	-7.922
67.828	-1.8459	-0.0552	1.1817	-0.0449	0.1142	-0.0131	1.031	0.8236	2.6031													67.812	-0.0227	-0.2247	1.3441	-0.0309	0.1037	-0.1822	0.5869	1.2723	-7.6498
67.89	-1.8329	-0.0552	1.1947	-0.0782	0.1405	-0.0155	0.3965	0.5672	1.7865													67.875	0.0034	-0.2247	1.3051	-0.0011	0.109	-0.175	1.3483	1.2723	-7.922
67.953	-1.8329	-0.0682	1.1947	-0.087	0.1318	-0.0083	0.7138	0.7595	1.6957													67.937	0.0034	-0.2378	1.2791	-0.0344	0.1107	-0.1629	0.1427	1.8493	-7.1054
68.015	-1.8199	-0.0552	1.2012	-0.0607	0.116	-0.0517	0.5234	0.1825	1.1513													68	0.0164	-0.2247	1.2336	-0.0151	0.13	-0.1798	0.8407	2.0416	-7.4684
68.078	-1.8199	-0.0552	1.2012	-0.0782	0.123	-0.03	0.2062	0.6313	1.3328													68.062	0.0034	-0.2247	1.1752	-0.0186	0.0985	-0.1774	0.7138	1.5288	-7.2869
68.14	-1.8199	-0.0552	1.1947	-0.0677	0.1581	-0.0155	0.7138	0.2466	1.8772													68.125	-0.0096	-0.2117	1.1492	-0.0291	0.0985	-0.1943	0.5234	1.2082	-7.1054
68.203	-1.8069	-0.0682	1.2012	-0.0747	0.1195	-0.0324	0.6503	0.5672	-0.119													68.187	0.0164	-0.2247	1.1167	-0.0239	0.1107	-0.1919	0.7138	0.7595	-7.7406
68.265	-1.8069	-0.0422	1.2141	-0.0502	0.123	-0.0324	0.1427	0.1825	1.0606													68.25	0.0294	-0.2378	1.0517	-0.0204	0.1283	-0.1871	1.4117	1.7211	-7.4684
68.328	-1.8069	-0.0552	1.2141	-0.0397	0.116	-0.0252	0.6503	0.1825	1.3328													68.312	0.0425	-0.2247	1.0127	-0.0081	0.1195	-0.2112	1.0945	0.6313	-7.0147
68.39	-1.7808	-0.0552	1.2076	-0.0572	0.1265	-0.0179	0.46	0.503	1.605													68.375	0.0034	-0.2247	0.9867	-0.0151	0.1265	-0.1943	1.2848	1.5929	-7.0147
68.453	-1.7678	-0.0552	1.2012	-0.0379	0.1177	-0.0228	0.2062	0.503	2.1494													68.437	0.0294	-0.2247	0.9477	0.0024	0.116	-0.1943	1.0945	1.4006	-6.8332
68.515	-1.7678	-0.0813	1.2012	-0.0362	0.1125	-0.0058	0.7138	0.7595	1.6957													68.5	0.0294	-0.2117	0.9022	0.0041	0.1423	-0.2112	0.9676	1.657	-7.1962
68.578	-1.7548	-0.0943	1.2206	0.1075	0.1195	-0.0131	1.5386	-0.8432	1.6957													68.562	0.0164	-0.2378	0.8567	-0.0011	0.116	-0.2257	1.6021	0.8877	-7.3776
68.64	-1.6506	-0.0682	1.2012	0.1969	0.1493	-0.0058	1.6655	-0.8432	2.6031													68.625	0.0425	-0.2117	0.8112	-0.0064	0.1037	-0.2402	1.2848	1.2082	-6.7425
68.703	-1.5855	-0.0813	1.2141	0.1583	0.1142	0.0038	1.1579	-0.9714	2.966													68.687	0.0555	-0.1986	0.7722	-0.0116	0.1125	-0.2354	1.6655	1.3365	-7.0147
68.765	-1.5073	-0.1074	1.2012	0.097	0.1125	-0.0179	0.5869	0.1184	2.7845													68.75	0.0555	-0.2508	0.7397	-0.0099	0.1037	-0.2499	1.1579	1.2082	-7.1962
68.828	-1.4162	-0.0682	1.2206	0.0199	0.0949	-0.0083	0.7138	0.8877	2.8753													68.812	0.0425	-0.2247	0.6877	-0.0081	0.1265	-0.2451	0.9041	1.8493	-7.1054
68.89	-1.312	-0.0813	1.2401	0.0094	0.123	-0.0034	-0.0476	0.7595	3.2382													68.875	0.0425	-0.2378	0.6617	-0.0029	0.0897	-0.2571	0.0793	1.7852	-6.7425
68.953	-1.2338	-0.0682	1.2596	0.0287	0.1212	-0.001	0.6503	0.6954	3.2382													68.937	0.0425	-0.2639	0.6033	-0.0046	0.123	-0.2596	0.9041	0.9518	-7.2869
69.015	-1.1557	-0.0813	1.2791	0.0585	0.1195	-0.0131	1.2214	0.3748	2.2401													69	0.0294	-0.2378	0.5773	-0.0169	0.1002	-0.2523	0.5234	1.5929	-6.924
69.078	-1.1166	-0.0813	1.2791	0.1864	0.1248	0.0159	1.3483	-0.138	2.5123													69.062	0.0294	-0.2378	0.5253	0.0041	0.0967	-0.2475	1.0945	1.657	-6.6518
69.14	-1.0385	-0.0813	1.2596	0.2407	0.0985	0.0087	0.8407	-0.9073	2.7845													69.125	0.0555	-0.2378	0.4928	-0.0186	0.0985	-0.2789	1.031	1.4647	-6.4703
69.203	-0.9473	-0.1074	1.2661	0.2723	0.1265	0.0038	1.2848	-0.715	3.6919													69.187	0.0425	-0.1986	0.4408	-0.0116	0.1125	-0.2813	1.2214	1.1441	-7.4684
69.265	-0.8822	-0.0813	1.2791	0.2092	0.13	-0.0083	0.5869	-0.0098	3.2382													69.25	0.0425	-0.2247	0.4018	-0.0151	0.102	-0.2958	0.3331	1.2723	-6.2888
69.328	-0.791	-0.0552	1.2596	0.1478	0.1142	-0.001	0.0158	0.6954	3.6011													69.312	0.0685	-0.2247	0.3563	-0.0204	0.1072	-0.3127	1.0945	1.657	-6.1981
69.39	-0.6999	-0.0813	1.2921	0.1408	0.1107	-0.0155	0.5234	0.9518	3.4197													69.375	0.0685	-0.2378	0.3303	-0.0186	0.1055	-0.3055	0.9041	1.4647	-6.2888
69.453	-0.6217	-0.0813	1.2986	0.1794	0.1248	-0.0131	0.7138	0.8877	3.4197													69.437	0.0946	-0.2117	0.2913	-0.0116	0.1125	-0.3103	0.7138	1.1441	-6.0166
69.515	-0.5566	-0.0682	1.2921	0.2109	0.1212	0.0038	0.9676	-0.138	3.7826													69.5	0.0555	-0.2117	0.2458	-0.0327	0.102	-0.3369	1.2214	1.4006	-6.1981
69.578	-0.4655	-0.0943	1.3051	0.3161	0.1072	-0.0155	0.8407	-0.9073	2.966													69.562	0.0815	-0.2247	0.1873	-0.0081	0.102	-0.3441	0.0793	1.9134	-6.561
69.64	-0.4003	-0.0943	1.3116	0.3441	0.1142	0.0111	1.3483	-0.6509	2.966													69.625	0.0685	-0.2378	0.1353	-0.0186	0.1055	-0.3345	0.9041	1.8493	-6.924
69.703	-0.2962	-0.0682	1.3051	0.2915	0.1037	-0.0131	0.5234	-0.2021	4.327													69.687	0.0946	-0.2508	0.1093	0.0076	0.0757	-0.3369	1.2848	1.2082	-7.2869
69.765	-0.218	-0.1074	1.2921	0.2758	0.1265	-0.0034	0.46	0.3748	2.7845													69.75	0.1076	-0.2378	0.0703	-0.0116	0.0914	-0.3659	0.1427	1.5929	-7.0147
69.828	-0.1399	-0.0943	1.2986	0.2407	0.1195	0.0014	0.7138	0.8877	2.966													69.812	0.0555	-0.2639	0.0443	-0.0239	0.1002	-0.3611	0.9676	1.5288	-6.4703
69.89	-0.0227	-0.1074	1.2986	0.2407	0.0844	0.0087	0.5869	0.7595	3.8733													69.875	0.0685	-0.2117	-0.0141	-0.0169	0.0932	-0.3659	1.1579	1.08	-6.4703
69.953	0.0555	-0.0813	1.3051	0.2985	0.1283	-0.0083	1.2214	0.7595	3.3289													69.937	0.0815	-0.2378	-0.0531	-0.0081	0.102	-0.378	1.5386	1.7211	-6.6518
70.015	0.1076	-0.0943	1.3181	0.3406	0.1248	-0.0083	0.5869	0.1184	3.9641													70	0.0685	-0.1986	-0.1051	-0.0134	0.0932	-0.3756	1.031	1.5929	-6.3796
70.078	0.1727	-0.0943	1.3116	0.3932	0.0932	-0.0155	0.9676	-0.0098	3.6011													70.062	0.0815	-0.2508	-0.1376	0.0006	0.0827	-0.4094	0.7138	1.2723	-6.1074
70.14	0.2769	-0.0943	1.3051	0.4107	0.1037	-0.0179	0.3331	-0.6509	4.327													70.125	0.0555	-0.2117	-0.1961	-0.0291	0.1055	-0.4094	0.7138	1.7852	-6.561
70.203	0.342	-0.1074	1.3116	0.3809	0.0914	-0.0058	0.9676	0.503	3.5104													70.187	0.0815	-0.2378	-0.2221	-0.0204	0.0686	-0.3997	0.9041	1.8493	-6.1981
70.265	0.4332	-0.0943	1.3051	0.3441	0.0792	-0.0179	0.8407	0.7595	3.4197													70.25	0.0685	-0.2378	-0.2676	-0.0151	0.102	-0.4021	1.1579	1.9775	-6.1074
70.328	0.5504	-0.0813	1.3246	0.3844	0.0879	-0.0155	0.9041	0.8236	2.8753													70.312	0.0946	-0.2117	-0.2936	0.0059	0.0669	-0.4432	1.1579	1.3365	-5.8352
70.39	0.5894	-0.1074	1.3116	0.4247	0.0757	-0.0228	-0.4283	0.1184	3.7826													70.375	0.0815	-0.2508	-0.3326	-0.0169	0.0862	-0.4311	1.2848	1.5929	-6.0166
70.453	0.6806	-0.1074	1.3246	0.5001	0.0774	0.0135	1.031	-0.2021	3.4197													70.437	0.0946	-0.2639	-0.3846	-0.0134	0.0827	-0.4456	0.2696	1.7211	-4.9278
70.515	0.7718	-0.0813	1.3116	0.5193	0.0827	-0.0228	0.3965	-0.715	3.3289													70.5	0.0815	-0.2378	-0.4301	-0.0081	0.0669	-0.436	1.4752	1.7852	-5.6537
70.578	0.8499	-0.1204	1.3116	0.5071	0.0529	-0.0083	0.6503	-0.5868	3.6919													70.562	0.0946	-0.2378	-0.4561	-0.0134	0.0616	-0.4819	0.3965	2.234	-5.3815
70.64	0.9281	-0.0682	1.3116	0.5018	0.0686	-0.0203	0.7772	0.9518	3.6919													70.625	0.0946	-0.2378	-0.5211	-0.0116	0.0774	-0.4988	0.5869	1.4006	-5.563
70.703	1.0062	-0.1074	1.3181	0.493	0.0634	-0.0131	1.0945	0.6313	3.9641													70.687	0.1206	-0.2378	-0.5471	0.0147	0.0862	-0.4891	0.5869	2.0416	-5.3815
70.765	1.0974	-0.0682	1.3311	0.5526	0.0423	-0.001	0.8407	0.8877	4.4177													70.75	0.1466	-0.2117	-0.5795	-0.0186	0.0844	-0.4891	0.9041	1.3365	-4.8371
70.828	1.1755	-0.0813	1.3181	0.5947	0.0529	-0.0083	-0.1111	0.3107	3.9641													70.812	0.1336	-0.2508	-0.612	-0.0081	0.0879	-0.4988	0.46	1.4006	-5.1093
70.89	1.2406	-0.0813	1.3246	0.6578	0.0283	-0.0179	0.6503	-0.5868	3.8733													70.875	0.1206	-0.2639	-0.6705	0.0094	0.0704	-0.5181	0.3331	1.5288	-4.7464
70.953	1.3448	-0.1074	1.3181	0.6753	0.0143	-0.0228	0.1427	-0.2021	3.8733													70.937	0.1206	-0.2247	-0.7095	-0.0046	0.0774	-0.5423	0.9676	1.657	-4.4742
71.015	1.4099	-0.0813	1.3181	0.6805	0.0371	-0.0131	0.2062	-0.0098	4.8714													71	0.1206	-0.2378	-0.742	-0.0151	0.0774	-0.5495	1.0945	1.0159	-4.8371
71.078	1.5011	-0.0943	1.3181	0.6911	0.0195	-0.0107	0.7772	0.5672	4.4177													71.062	0.1336	-0.2247	-0.794	-0.0011	0.0844	-0.5447	0.46	1.4006	-4.7464
71.14	1.5662	-0.0943	1.3311	0.6946	-0.012	-0.0203	0.7138	-0.0098	3.3289													71.125	0.1206	-0.2378	-0.833	0.0041	0.0511	-0.5713	0.9676	1.7852	-4.5649
71.203	1.6574	-0.0943	1.3116	0.7471	-0.0015	-0.0107	1.031	0.8236	4.5085													71.187	0.0946	-0.2378	-0.846	0.0041	0.0616	-0.5906	0.6503	1.2082	-4.5649
71.265	1.7225	-0.0813	1.3116	0.8242	-0.0155	-0.0131	0.5234	-0.4586	4.1455													71.25	0.1336	-0.2378	-0.8915	-0.0046	0.0669	-0.5761	0.46	1.657	-4.7464
71.328	1.7876	-0.1074	1.3181	0.9241	-0.0278	0.0038	1.4752	-0.3945	2.7845													71.312	0.1076	-0.2378	-0.9435	-0.0116	0.0634	-0.593	1.0945	1.657	-4.2927
71.39	1.8657	-0.0682	1.3181	0.9381	-0.0103	0.0135	1.8559	-0.5227	3.6011													71.375	0.1076	-0.2378	-1.015	-0.0029	0.0686	-0.622	0.8407	1.657	-4.7464
71.453	1.9699	-0.0813	1.3181	0.9837	-0.0488	-0.0397	1.2848	-0.715	3.5104													71.437	0.1336	-0.2378	-1.0345	-0.0134	0.0792	-0.6051	0.6503	2.1057	-4.5649
71.515	2.0351	-0.1074	1.3116	0.9627	-0.0173	-0.0203	1.4752	0.8877	4.1455													71.5	0.1466	-0.2247	-1.0735	-0.0151	0.0739	-0.6341	0.8407	1.9134	-4.4742
71.578	2.1523	-0.1074	1.3311	0.9644	-0.0296	-0.0107	1.9193	0.5672	4.0548													71.562	0.1336	-0.2247	-1.1255	-0.0256	0.0599	-0.6655	0.5869	1.9134	-4.202
71.64	2.2044	-0.0552	1.3311	1.0293	-0.0278	-0.0155	1.4752	1.0159	4.1455													71.625	0.1466	-0.2247	-1.1515	-0.0099	0.0651	-0.6728	0.7138	1.9134	-4.6556
71.703	2.2955	-0.0813	1.3246	1.1361	-0.0366	-0.0131	1.4752	-0.5227	4.2363													71.687	0.1336	-0.2247	-1.2099	-0.0362	0.0774	-0.6945	0.3965	1.9775	-4.202
71.765	2.3476	-0.0813	1.3376	1.201	-0.0594	-0.0252	1.6021	-1.0355	2.8753													71.75	0.1597	-0.2117	-1.2424	-0.0151	0.0879	-0.6921	1.6021	2.1699	-3.7483
71.828	2.4778	-0.0552	1.3311	1.2798	-0.0366	-0.0179	2.2366	-0.9073	3.1475													71.812	0.1336	-0.2247	-1.2944	-0.0011	0.0774	-0.6945	1.2214	1.5288	-3.9298
71.89	2.5299	-0.0682	1.3311	1.3184	-0.0296	-0.0252	1.6021	-0.2663	3.3289													71.875	0.1336	-0.2247	-1.3334	-0.0239	0.0862	-0.7404	0.5869	2.2981	-4.2927
71.953	2.6211	-0.0552	1.3311	1.2851	-0.0418	-0.03	1.6021	0.2466	3.8733													71.937	0.1336	-0.2247	-1.3659	0.0147	0.0616	-0.7404	0.9041	1.8493	-4.1112
72.015	2.6862	-0.0422	1.3051	1.3622	-0.0278	-0.0276	2.1731	0.5672	3.6011													72	0.1206	-0.2247	-1.4504	-0.0046	0.0634	-0.7477	0.9041	1.8493	-3.6576
72.078	2.7644	-0.0422	1.3246	1.3412	-0.0348	-0.0324	1.8559	1.0159	4.327													72.062	0.1727	-0.2247	-1.4569	0.0024	0.0529	-0.7598	1.031	1.8493	-3.6576
72.14	2.8686	-0.0291	1.3376	1.4866	-0.0576	-0.0179	2.3	0.3107	3.7826													72.125	0.1727	-0.2378	-1.5089	0.0217	0.0476	-0.8033	0.5869	1.657	-3.6576
72.203	2.9206	-0.0291	1.3376	1.5742	-0.0471	-0.0034	2.0462	-0.5868	4.0548													72.187	0.1466	-0.2769	-1.5414	0.0094	0.0353	-0.8226	0.3331	2.1699	-3.2946
72.265	2.9988	-0.0161	1.3311	1.7092	-0.0594	0.0062	1.8559	-0.9073	4.5085													72.25	0.1597	-0.2508	-1.5739	0.0129	0.0564	-0.8178	1.4117	2.1057	-3.9298
72.328	3.09	-0.0422	1.3311	1.7687	-0.0734	-0.03	2.0462	-1.0997	2.7845													72.312	0.1597	-0.2378	-1.6194	0.0006	0.0301	-0.8347	0.6503	1.9775	-3.4761
72.39	3.1811	-0.003	1.3376	1.7687	-0.0629	-0.0203	1.9193	0.1825	3.5104													72.375	0.1727	-0.2247	-1.6649	0.0041	0.0581	-0.8516	0.6503	1.4647	-4.2927
72.453	3.2593	-0.0161	1.3311	1.7757	-0.0629	-0.03	2.4269	1.4647	3.2382													72.437	0.1727	-0.2639	-1.6844	0.0112	0.0371	-0.8878	0.3965	1.1441	-3.839
72.515	3.3374	0.01	1.3376	1.8791	-0.0892	-0.0203	1.9193	0.4389	3.9641													72.5	0.1727	-0.2247	-1.7429	0.0217	0.0336	-0.8951	1.3483	2.1699	-4.1112
72.578	3.4155	0.01	1.3181	2.0211	-0.0944	-0.0155	1.8559	-0.9073	3.0567													72.562	0.1466	-0.2247	-1.7688	-0.0029	0.0546	-0.8999	0.9676	2.0416	-3.3854
72.64	3.4676	0.01	1.3311	2.2103	-0.0734	-0.0228	2.8711	-1.292	3.6919													72.625	0.1727	-0.2378	-1.8273	0.0076	0.0441	-0.9265	0.9676	2.2981	-3.4761
72.703	3.5848	0.01	1.3311	2.2454	-0.0839	-0.0155	2.4904	-1.4202	2.4216													72.687	0.1466	-0.2378	-1.8533	0.0094	0.0423	-0.9628	0.7138	2.1699	-3.4761
72.765	3.6369	0.0491	1.3311	2.3067	-0.0857	-0.001	2.4269	-0.2021	3.2382													72.75	0.1987	-0.2378	-1.9248	0.0199	0.0388	-0.9917	0.9041	1.7211	-3.5668
72.828	3.7281	0.0491	1.3311	2.3102	-0.0787	-0.0324	2.4269	0.4389	2.5123													72.812	0.1857	-0.2378	-1.9443	0.0182	0.0511	-1.0183	0.2062	2.1699	-2.9317
72.89	3.7932	0.0622	1.3311	2.333	-0.0594	-0.0107	2.4269	0.6954	2.4216													72.875	0.1857	-0.2508	-1.9833	0.0147	0.0336	-1.0183	0.7138	1.7852	-4.2927
72.953	3.8583	0.0491	1.3311	2.4872	-0.0699	-0.03	1.9193	0.1825	3.2382													72.937	0.1727	-0.2378	-2.0548	0.0164	0.0529	-1.0594	1.2848	1.8493	-2.2966
73.015	3.9495	0.0883	1.3246	2.7027	-0.0681	-0.0348	2.7442	-0.9073	2.5123													73	0.1727	-0.2378	-2.0613	0.0094	0.0423	-1.0522	1.2214	2.6827	-3.7483
73.078	4.0146	0.1013	1.3311	2.8271	-0.0804	-0.0179	2.8076	-1.3561	2.4216													73.062	0.1727	-0.2117	-2.1068	0.0059	0.0458	-1.115	1.7924	2.234	-2.7502
73.14	4.1188	0.0883	1.3311	2.8832	-0.0559	-0.0276	2.7442	-1.0355	2.2401													73.125	0.1206	-0.2247	-2.1588	0.0059	0.0248	-1.1126	1.031	1.7211	-3.2039
73.203	4.21	0.1013	1.3311	2.9375	-0.0822	-0.0228	2.3635	-0.4586	2.2401													73.187	0.1857	-0.2247	-2.1978	0.0059	0.0423	-1.1464	0.9041	1.9775	-2.3873
73.265	4.2881	0.1274	1.3311	3.0041	-0.0751	-0.0179	2.9345	0.8236	2.4216													73.25	0.1597	-0.2508	-2.2238	0.0252	0.0266	-1.1682	0.9676	1.5288	-3.0224
73.328	4.3532	0.1143	1.3311	3.1163	-0.0787	-0.0397	2.2366	0.2466	1.605													73.312	0.1727	-0.2378	-2.2888	0.0147	0.0441	-1.202	0.8407	2.1699	-2.6595
73.39	4.4574	0.1274	1.3376	3.2687	-0.0488	0.0038	1.8559	-1.292	2.1494													73.375	0.1727	-0.2378	-2.3148	-0.0169	0.016	-1.2358	1.1579	2.3622	-2.9317
73.453	4.5095	0.1274	1.3311	3.4317	-0.0822	-0.0228	2.6807	-1.7407	2.1494													73.437	0.1466	-0.1986	-2.3602	0.0129	0.0038	-1.2793	1.2848	2.4904	-2.2058
73.515	4.5877	0.1274	1.3311	3.514	-0.0524	-0.0155	1.6655	-0.9714	1.1513													73.5	0.1597	-0.2639	-2.3927	0.0041	0.0055	-1.2962	0.8407	2.4263	-2.478
73.578	4.6658	0.1535	1.3311	3.6104	-0.0681	-0.0034	2.6807	-0.5868	1.6957													73.562	0.1987	-0.2378	-2.4382	-0.0029	0.0125	-1.3156	0.2062	2.5545	-2.841
73.64	4.77	0.1665	1.3311	3.6542	-0.0559	0.0062	3.0614	-0.0739	2.0587													73.625	0.1857	-0.2117	-2.4772	0.0322	0.016	-1.3808	0.5234	1.9775	-2.6595
73.703	4.8091	0.1535	1.3376	3.7664	-0.0576	-0.0131	2.6807	-0.2021	0.6977													73.687	0.1857	-0.2247	-2.5227	0.0234	0.0038	-1.4025	0.46	1.9134	-2.7502
73.765	4.8872	0.1795	1.3246	3.8855	-0.0769	-0.0058	1.9828	-0.9073	1.0606													73.75	0.1727	-0.2117	-2.5617	0.0322	0.009	-1.434	0.9676	2.1699	-2.5688
73.828	4.9393	0.1926	1.3181	4.031	-0.0331	-0.0203	1.9828	-0.9073	1.2421													73.812	0.1857	-0.2378	-2.6007	0.0322	-0.005	-1.446	1.2848	2.1057	-3.2946
73.89	5.0695	0.1795	1.3246	4.208	-0.0804	-0.0058	3.1249	-1.1638	0.1533													73.875	0.1857	-0.2378	-2.6332	-0.0029	-0.0155	-1.504	1.3483	2.2981	-2.1151
73.953	5.1216	0.1926	1.3116	4.3061	-0.0664	-0.0203	2.6173	-1.292	0.6977													73.937	0.1857	-0.2247	-2.6722	-0.0064	-0.0085	-1.5306	0.5234	2.1057	-2.3873
74.015	5.1998	0.1926	1.3246	4.4323	-0.0524	-0.0058	3.1883	-0.4586	0.1533													74	0.1727	-0.2247	-2.7177	0.0374	0.0003	-1.5548	0.7138	1.5288	-3.2039
74.078	5.2519	0.2187	1.3181	4.4848	-0.0629	-0.0131	1.8559	-0.3945	-0.119													74.062	0.1466	-0.2247	-2.7567	-0.0169	-0.005	-1.6104	0.5869	2.0416	-2.1151
74.14	5.356	0.2448	1.3311	4.6233	-0.0576	-0.0179	2.998	-0.138	0.4255													74.125	0.1987	-0.2247	-2.7957	0.0024	-0.0138	-1.6321	0.2696	1.9775	-1.8429
74.203	5.4212	0.2187	1.3051	4.7582	-0.0383	-0.0155	2.4904	-0.5227	0.1533													74.187	0.1727	-0.2378	-2.8477	-0.0029	-0.005	-1.6466	0.3965	1.9775	-2.2966
74.265	5.5384	0.2317	1.3116	4.9772	-0.026	-0.0107	2.4269	-1.6125	-0.7541													74.25	0.1727	-0.2508	-2.8867	-0.0239	-0.0085	-1.6925	0.46	2.5545	-2.5688
74.328	5.5644	0.2448	1.2921	5.1087	-0.0594	-0.0228	3.0614	-1.4843	-1.3892													74.312	0.1597	-0.303	-2.9387	-0.0029	0.0125	-1.6877	0.5869	2.1699	-1.8429
74.39	5.6426	0.2578	1.2791	5.2559	-0.0208	-0.0445	2.998	-1.6766	-1.48													74.375	0.1597	-0.2378	-2.9516	-0.0274	-0.019	-1.7602	0.2062	1.5288	-2.9317
74.453	5.7207	0.2578	1.2986	5.3207	-0.0401	-0.0034	2.5538	-0.4586	-1.5707													74.437	0.1857	-0.2769	-3.0101	-0.0239	-0.0015	-1.7771	0.3331	1.7852	-2.0244
74.515	5.8379	0.2839	1.2921	5.4223	-0.0331	-0.0155	1.7924	-0.5868	-1.48													74.5	0.1857	-0.2117	-3.0556	0.0164	0.0003	-1.8351	0.3331	1.4006	-2.3873
74.578	5.89	0.2578	1.2921	5.5327	-0.0383	-0.0228	1.6021	-1.0355	-1.9336													74.562	0.2118	-0.2117	-3.0881	-0.0186	0.0108	-1.8762	1.031	2.3622	-1.6614
74.64	5.9812	0.2839	1.2921	5.7062	-0.0225	-0.0348	2.1097	-1.292	-2.3873													74.625	0.1727	-0.2378	-3.1271	-0.0309	-0.0015	-1.9293	0.9676	1.7852	-3.1132
74.703	5.9942	0.323	1.2856	5.9323	-0.0173	0.0183	2.9345	-2.51	-2.6595													74.687	0.1597	-0.2378	-3.1921	0.0076	0.0055	-1.9752	0.2062	1.4006	-1.5707
74.765	6.0984	0.2969	1.2856	6.0567	-0.0155	-0.0155	2.1097	-1.5484	-3.1132													74.75	0.1727	-0.2378	-3.2181	0.0304	0.0038	-2.0042	0.6503	1.5929	-2.3873
74.828	6.2026	0.2839	1.2791	6.1425	-0.0208	-0.0228	2.2366	-2.1895	-2.7502													74.812	0.1727	-0.2247	-3.2636	-0.0134	-0.0225	-2.0477	0.9041	1.7211	-2.7502
74.89	6.3068	0.31	1.2791	6.2897	-0.0103	-0.0324	2.7442	-1.5484	-4.202													74.875	0.1727	-0.2769	-3.2961	-0.0151	-0.0033	-2.1106	0.3965	1.3365	-1.5707
74.953	6.3849	0.31	1.2791	6.4457	-0.0366	-0.0203	2.1097	-1.1638	-3.2039													74.937	0.1987	-0.2117	-3.3481	0.0076	0.002	-2.1323	0.2062	2.0416	-1.48
75.015	6.4109	0.336	1.2661	6.6244	-0.0225	-0.001	2.8711	-2.4459	-3.6576													75	0.1727	-0.2117	-3.3806	0.0059	-0.0068	-2.2024	0.3331	2.2981	-1.7522
75.078	6.5282	0.323	1.2726	6.8312	-0.0296	-0.0252	2.9345	-2.51	-4.6556													75.062	0.1597	-0.2378	-3.4326	0.0024	0.0073	-2.2459	0.6503	1.3365	-2.2058
75.14	6.6193	0.336	1.2596	6.8978	-0.0085	-0.0276	2.2366	-2.1895	-3.3854													75.125	0.1727	-0.2247	-3.4716	0.0059	-0.0103	-2.2966	0.46	2.0416	-3.0224
75.203	6.6714	0.336	1.2596	7.031	0.0055	-0.0324	2.5538	-1.6125	-4.0205													75.187	0.1727	-0.2247	-3.5106	0.0059	0.0003	-2.3474	1.4752	2.4263	-2.5688
75.265	6.7626	0.3491	1.2531	7.1238	-0.0488	-0.001	1.9193	-1.2279	-4.6556													75.25	0.1727	-0.2378	-3.556	-0.0186	0.0038	-2.3836	0.1427	1.7211	-2.5688
75.328	6.8277	0.336	1.2596	7.3376	-0.0348	-0.0228	2.7442	-2.8306	-4.4742													75.312	0.1727	-0.2247	-3.6015	0.0252	-0.012	-2.461	0.6503	2.1057	-2.6595
75.39	6.8928	0.336	1.2531	7.4901	-0.0015	-0.0203	3.3787	-2.8306	-4.7464													75.375	0.1597	-0.2508	-3.647	0.0112	-0.0225	-2.5141	0.9676	1.7852	-2.1151
75.453	6.9449	0.3491	1.2401	7.6425	-0.0278	-0.0203	1.9193	-1.9972	-5.8352													75.437	0.1857	-0.2117	-3.6665	0.0041	0.0055	-2.5552	1.2848	1.5929	-2.6595
75.515	7.023	0.336	1.2401	7.6145	-0.0278	-0.0203	2.4904	-2.0613	-5.8352													75.5	0.1857	-0.2378	-3.7185	0.0234	-0.0208	-2.6277	1.5386	2.234	-2.7502
75.578	7.0621	0.3621	1.2466	7.3814	0.0055	-0.0252	3.1883	0.1825	-6.1981													75.562	0.1727	-0.2378	-3.7575	-0.0256	-0.0243	-2.6784	0.1427	1.8493	-1.6614
75.64	7.0751	0.3621	1.2401	6.847	-0.0524	-0.0372	2.1731	1.3365	-4.5649													75.625	0.1597	-0.1595	-3.7965	0.0059	-0.0278	-2.7533	0.5869	2.4263	-2.2966
75.703	7.01	0.3621	1.2466	6.7208	0.0704	-0.0131	2.3635	-0.2663	-2.0244													75.687	0.1727	-0.2247	-3.8355	-0.0046	-0.0383	-2.792	1.0945	2.6827	-2.1151
75.765	6.9449	0.3752	1.2401	6.4089	0.1125	-0.0107	2.9345	-1.3561	-1.9336													75.75	0.1857	-0.2247	-3.8745	-0.0081	-0.0278	-2.8524	0.7772	2.4904	-1.5707
75.828	6.8537	0.3491	1.2271	6.1828	0.0266	-0.0276	1.6021	-1.9331	-0.0282													75.812	0.1727	-0.2508	-3.9135	0.0182	-0.019	-2.9128	1.5386	2.1057	-2.3873
75.89	6.8016	0.3752	1.2401	5.8271	0.0914	-0.0372	1.9828	-0.9073	-0.119													75.875	0.1727	-0.2117	-3.959	0.0269	-0.0243	-3.0022	1.031	1.8493	-1.6614
75.953	6.7365	0.3621	1.2401	5.4784	0.1212	-0.0324	2.8711	1.4006	-0.6634													75.937	0.1597	-0.1986	-4.0045	-0.0029	-0.0225	-3.0554	1.2848	2.1057	-1.6614
76.015	6.6975	0.3621	1.2466	5.1174	0.0757	-0.0228	1.6655	1.5929	0.244													76	0.1857	-0.2117	-4.0435	-0.0274	-0.026	-3.0747	0.9041	2.6186	-1.8429
76.078	6.5933	0.3621	1.2596	5.0403	0.1037	-0.03	3.1249	0.7595	1.2421													76.062	0.1727	-0.2117	-4.0955	0.0217	-0.0471	-3.1786	1.6655	1.9775	-0.6634
76.14	6.5151	0.3752	1.2466	4.8388	0.0949	-0.0228	1.4117	-0.9714	1.605													76.125	0.1857	-0.2378	-4.1215	0.0164	-0.0488	-3.2052	1.6655	2.1057	-1.8429
76.203	6.424	0.3621	1.2531	4.6303	0.1142	-0.0397	1.9193	0.4389	1.9679													76.187	0.1987	-0.2117	-4.1539	0.0024	-0.0383	-3.2656	1.3483	2.2981	-1.8429
76.265	6.3198	0.3752	1.2466	4.3832	0.1511	-0.0203	2.5538	1.2082	2.0587													76.25	0.1727	-0.2117	-4.1929	0.0164	-0.0383	-3.3768	1.1579	1.9775	-1.8429
76.328	6.2807	0.3621	1.2596	4.1361	0.1458	-0.03	1.8559	1.4006	2.966													76.312	0.1727	-0.1986	-4.2449	0.0147	-0.0366	-3.43	1.2848	2.1057	-1.8429
76.39	6.2286	0.3491	1.2596	3.9521	0.1546	-0.03	2.5538	2.234	2.4216													76.375	0.1597	-0.1986	-4.2904	0.0094	-0.0453	-3.4976	1.031	1.9775	-1.5707
76.453	6.1114	0.4143	1.2661	3.7962	0.1283	-0.0542	2.1097	1.1441	3.0567													76.437	0.1466	-0.1986	-4.3359	-0.0046	-0.0559	-3.5846	0.5234	2.234	-1.6614
76.515	6.0463	0.4013	1.2661	3.7611	0.1528	-0.0276	2.9345	0.4389	3.6011													76.5	0.1857	-0.2378	-4.3684	0.0024	-0.0418	-3.6209	1.6021	2.0416	-1.117
76.578	5.9681	0.3752	1.2661	3.5105	0.1265	-0.0445	1.8559	1.0159	4.8714													76.562	0.1727	-0.1856	-4.4139	-0.0116	-0.0453	-3.7006	1.0945	2.2981	-0.4819
76.64	5.903	0.3752	1.2726	3.3248	0.123	-0.0445	1.9193	1.8493	3.5104													76.625	0.1857	-0.1986	-4.4789	0.0076	-0.0611	-3.7755	1.0945	2.2981	-0.7541
76.703	5.8249	0.3752	1.2856	3.118	0.1335	-0.0397	1.6021	2.5545	4.1455													76.687	0.1597	-0.1856	-4.5114	0.0076	-0.0506	-3.8601	0.7138	2.0416	-0.5726
76.765	5.7467	0.4013	1.2921	2.934	0.1283	-0.0252	2.3	2.4904	4.5085													76.75	0.1857	-0.1986	-4.5439	0.0076	-0.0506	-3.9084	1.6655	2.3622	-1.3892
76.828	5.6816	0.3621	1.2986	2.8762	0.13	-0.0397	1.8559	1.9134	4.4177													76.812	0.1597	-0.1856	-4.5699	0.0252	-0.0506	-3.9978	1.7924	2.234	-1.3892
76.89	5.6165	0.3882	1.2791	2.8324	0.1283	-0.001	1.7924	0.8236	4.4177													76.875	0.1857	-0.1595	-4.6284	0.0234	-0.0559	-4.08	1.2214	2.2981	-1.2985
76.953	5.5253	0.3621	1.3051	2.6607	0.1423	-0.0155	1.7924	0.3107	4.5992													76.937	0.1987	-0.1726	-4.6674	0.0147	-0.0471	-4.1621	1.031	2.234	-0.7541
77.015	5.4342	0.3752	1.3051	2.4872	0.1335	-0.0324	1.4752	1.4006	3.9641													77	0.1857	-0.1595	-4.7064	0.0112	-0.0401	-4.2346	1.1579	2.4904	-0.4819
77.078	5.356	0.3882	1.2986	2.2646	0.1423	-0.0083	2.3	1.9775	4.5085													77.062	0.1466	-0.1726	-4.7453	0.0182	-0.0436	-4.3095	1.0945	2.1699	0.0625
77.14	5.317	0.3752	1.3051	2.1385	0.1388	-0.0179	1.6655	2.7468	3.7826													77.125	0.1597	-0.1856	-4.8038	0.0269	-0.0594	-4.4038	1.3483	2.4263	0.1533
77.203	5.2388	0.3621	1.3116	2.0614	0.1283	-0.03	0.6503	1.8493	3.4197													77.187	0.1597	-0.1595	-4.8428	0.0287	-0.0751	-4.4859	0.6503	2.1057	-0.2097
77.265	5.1086	0.3621	1.3116	2.0106	0.1405	-0.0179	1.9828	1.5288	3.9641													77.25	0.1727	-0.1726	-4.8688	0.0147	-0.0541	-4.5439	1.4117	3.0033	0.0625
77.328	5.0435	0.3752	1.3051	1.9159	0.1195	-0.0324	1.9193	1.5929	3.6011													77.312	0.1727	-0.1465	-4.9208	-0.0046	-0.0488	-4.6285	1.9193	2.4904	1.1513
77.39	4.9784	0.3752	1.3051	1.7828	0.123	-0.03	1.2848	1.7211	4.5992													77.375	0.1857	-0.1465	-4.9598	0.0339	-0.0629	-4.73	1.729	1.4006	0.3347
77.453	4.9263	0.3752	1.3246	1.6741	0.1335	-0.0131	1.5386	2.4904	3.6011													77.437	0.1597	-0.1595	-4.9793	0.0252	-0.0787	-4.7832	1.5386	2.6186	0.1533
77.515	4.8611	0.3491	1.3441	1.5479	0.1405	-0.0155	1.2848	2.234	2.966													77.5	0.1987	-0.1465	-5.0443	0.0006	-0.0751	-4.8871	2.1097	2.8109	-0.3004
77.578	4.77	0.3752	1.3246	1.4708	0.137	-0.0324	1.031	1.8493	4.1455													77.562	0.1857	-0.1595	-5.0768	0.0164	-0.0629	-4.9596	1.2848	2.3622	0.8791
77.64	4.7179	0.3621	1.3506	1.4148	0.1616	-0.03	1.5386	1.2082	3.5104													77.625	0.1727	-0.1465	-5.1028	0.0129	-0.0629	-5.0514	0.9041	1.9775	1.0606
77.703	4.6007	0.3491	1.3506	1.3815	0.1353	-0.0348	1.6655	1.08	3.2382													77.687	0.1466	-0.1856	-5.1613	0.0024	-0.0488	-5.1336	1.9193	2.3622	1.2421
77.765	4.5356	0.3621	1.3441	1.236	0.1651	-0.0203	1.0945	1.5288	3.9641													77.75	0.1987	-0.1334	-5.2003	0.0147	-0.0506	-5.206	2.3	2.1057	0.3347
77.828	4.4444	0.3621	1.3571	1.1835	0.144	-0.0179	0.2062	2.0416	2.6938													77.812	0.1857	-0.1204	-5.2393	0.0164	-0.0559	-5.2882	2.7442	2.0416	0.5162
77.89	4.3663	0.323	1.3571	1.0328	0.1476	-0.0228	0.6503	3.1315	3.6919													77.875	0.1857	-0.1334	-5.2913	0.0112	-0.0646	-5.4042	1.6655	2.4904	0.3347
77.953	4.2621	0.336	1.3701	0.9942	0.1511	-0.0397	0.2696	2.6186	3.3289													77.937	0.1857	-0.1204	-5.3172	0.0199	-0.0664	-5.467	1.3483	2.2981	0.6977
78.015	4.236	0.336	1.3831	0.9136	0.1476	-0.0203	0.8407	2.8109	2.6031													78	0.2118	-0.1204	-5.3757	0.0006	-0.0892	-5.5661	2.3635	2.4263	0.3347
78.078	4.1449	0.31	1.3831	0.8786	0.1546	-0.03	0.5869	1.7852	3.2382													78.062	0.1727	-0.0943	-5.4017	0.0076	-0.0822	-5.6628	1.729	2.8109	0.3347
78.14	4.0276	0.31	1.3766	0.8733	0.1598	-0.0203	0.9041	1.2082	2.2401													78.125	0.1857	-0.1074	-5.4147	0.0182	-0.0716	-5.7642	2.1097	2.6827	0.6069
78.203	3.9886	0.2969	1.3896	0.833	0.1581	-0.0083	0.3965	1.3365	1.9679													78.187	0.1987	-0.0943	-5.4667	0.0304	-0.0734	-5.8633	1.6021	2.1699	1.3328
78.265	3.8844	0.2969	1.3831	0.7349	0.1546	-0.0276	0.6503	1.7211	2.0587													78.25	0.1727	-0.1204	-5.5187	0.0427	-0.0927	-5.9576	2.4904	2.1699	0.4255
78.328	3.8062	0.31	1.3831	0.6104	0.1739	-0.0131	-0.238	2.234	3.5104													78.312	0.1857	-0.0943	-5.5447	0.0199	-0.0769	-6.0325	1.4752	2.2981	0.5162
78.39	3.7281	0.2969	1.3831	0.5736	0.1476	-0.0034	0.3965	2.6186	3.5104													78.375	0.2118	-0.1074	-5.5837	0.048	-0.0664	-6.1171	1.8559	2.2981	0.7884
78.453	3.676	0.2839	1.4026	0.5088	0.1809	-0.0058	1.3483	1.657	2.4216													78.437	0.2118	-0.1334	-5.6292	-0.0134	-0.0857	-6.2282	2.0462	1.5929	1.0606
78.515	3.5458	0.2839	1.4026	0.5036	0.137	-0.0228	0.5234	1.7211	1.9679													78.5	0.2118	-0.0943	-5.6942	0.0585	-0.0909	-6.32	1.729	2.5545	1.2421
78.578	3.4937	0.2578	1.4156	0.5001	0.1476	-0.0348	0.0158	2.1057	1.1513													78.562	0.1466	-0.0943	-5.7267	0.0357	-0.0892	-6.3949	1.729	2.1699	1.9679
78.64	3.3895	0.2708	1.4091	0.4948	0.1563	-0.03	0.9676	1.7852	1.4235													78.625	0.2118	-0.0682	-5.7657	-0.0134	-0.1032	-6.5158	2.7442	2.2981	1.0606
78.703	3.3114	0.2708	1.4091	0.486	0.144	-0.0155	0.3965	1.2082	0.6069													78.687	0.1727	-0.0943	-5.8047	0.0339	-0.0874	-6.6003	2.9345	2.234	1.4235
78.765	3.2202	0.2708	1.4221	0.4019	0.1616	-0.0252	0.0793	0.8877	0.8791													78.75	0.2248	-0.0552	-5.8437	0.0444	-0.0944	-6.6873	2.8076	2.7468	1.7865
78.828	3.1681	0.2578	1.4221	0.3073	0.1686	-0.0276	0.0793	2.2981	0.3347													78.812	0.2118	-0.0813	-5.8957	0.0392	-0.1032	-6.8106	2.5538	2.3622	1.7865
78.89	3.0639	0.2187	1.4286	0.267	0.1633	-0.0228	-0.1745	2.4263	0.6069													78.875	0.2118	-0.0813	-5.9216	0.0252	-0.1102	-6.9048	1.7924	2.234	2.4216
78.953	2.9858	0.2317	1.4481	0.2793	0.1581	-0.0058	0.5869	2.4263	-0.0282													78.937	0.1987	-0.0682	-5.9606	0.0462	-0.0857	-6.9821	2.0462	1.8493	1.605
79.015	2.9858	0.2317	1.4546	0.4948	0.1493	-0.0107	0.0793	-0.138	-1.5707													79	0.2248	-0.0422	-6.0126	0.0304	-0.1155	-7.1054	2.3	2.234	1.605
79.078	2.9337	0.2187	1.4416	0.4895	0.13	-0.0252	0.8407	0.7595	-1.8429													79.062	0.1857	-0.0552	-6.0516	0.0392	-0.0997	-7.1972	2.998	2.5545	2.1494
																						79.125	0.2378	-0.0813	-6.0906	0.0339	-0.1085	-7.2914	2.4904	2.9392	2.966
																						79.187	0.2248	-0.0422	-6.1361	0.0427	-0.1137	-7.3978	1.7924	1.7211	2.966
																						79.25	0.1857	-0.0422	-6.1816	0.0339	-0.119	-7.4872	2.6807	2.234	2.4216
																						79.312	0.2118	-0.0552	-6.2271	0.0322	-0.0927	-7.5814	2.5538	2.6186	2.2401
																						79.375	0.2378	-0.0552	-6.2531	0.048	-0.1155	-7.7337	1.8559	2.2981	3.1475
																						79.437	0.2248	-0.0552	-6.2856	0.048	-0.0909	-7.6757	1.9828	2.1699	2.966
																						79.5	0.2118	-0.0291	-6.2791	0.0339	-0.0734	-7.5379	1.8559	2.0416	1.6957
																						79.562	0.2118	-0.0291	-6.2466	0.0269	-0.0699	-7.376	2.8711	2.8109	2.6938
																						79.625	0.1987	-0.0552	-6.2336	0.0094	-0.0524	-7.1634	1.9828	2.0416	1.9679
																						79.687	0.2118	-0.0291	-6.1881	0.0129	-0.0208	-6.9556	1.8559	2.2981	2.3309
																						79.75	0.2118	-0.0291	-6.1556	0.0147	0.009	-6.7743	2.3635	2.5545	2.2401
																						79.812	0.2248	-0.0291	-6.1101	0.0076	0.023	-6.5883	2.2366	2.5545	1.605
																						79.875	0.2248	-0.0422	-6.0711	0.0147	0.0406	-6.4119	1.9193	3.1315	1.3328
																						79.937	0.2118	-0.0291	-6.0321	0.0164	0.0423	-6.2596	0.9041	1.8493	0.9699
																						80	0.2248	-0.0682	-5.9671	0.0182	0.0301	-6.1726	1.7924	3.2597	0.7884
																						80.062	0.2248	-0.0422	-5.9476	0.0199	0.0599	-5.9769	1.0945	2.2981	1.605
																						80.125	0.1727	-0.0291	-5.8957	-0.0239	0.0792	-5.8077	0.7138	2.1699	1.8772
																						80.187	0.1987	-0.0422	-5.8632	-0.0081	0.0599	-5.7135	1.5386	2.4904	0.6069
																						80.25	0.2248	-0.0422	-5.8112	-0.0046	0.0599	-5.5033	1.2848	2.7468	0.6977
																						80.312	0.2248	-0.0291	-5.7787	0.0147	0.0862	-5.3462	1.6021	2.1699	1.0606
																						80.375	0.2248	-0.0552	-5.7462	-0.0046	0.0599	-5.2834	0.7772	2.234	0.6069
																						80.437	0.2118	-0.0422	-5.7007	0.0304	0.0774	-5.1094	0.9676	2.2981	0.5162
																						80.5	0.2118	-0.0291	-5.6617	-0.0239	0.0651	-5.02	1.3483	2.5545	0.0625
																						80.562	0.2248	-0.0291	-5.6292	0.0024	0.0634	-4.8581	0.7138	2.0416	0.6977
																						80.625	0.1857	-0.0552	-5.5837	-0.0099	0.0792	-4.7373	0.5234	2.1057	0.6069
																						80.687	0.1857	-0.0422	-5.5317	0.0094	0.0739	-4.6358	1.5386	2.3622	0.6069
																						80.75	0.1857	-0.0682	-5.4927	0.0182	0.0967	-4.5343	0.9041	1.9775	0.9699
																						80.812	0.2248	-0.0161	-5.4667	0.0147	0.1002	-4.3845	0.5234	2.875	-0.0282
																						80.875	0.1857	-0.0422	-5.4277	-0.0046	0.0914	-4.3095	1.3483	2.4263	0.244
																						80.937	0.2118	-0.0552	-5.3887	0.0076	0.0932	-4.2129	0.6503	2.7468	0.3347
																						81	0.2378	-0.0552	-5.3432	0.0112	0.0967	-4.0921	0.0793	2.5545	0.6977
																						81.062	0.2248	-0.0813	-5.3043	-0.0186	0.1125	-4.022	0.2696	2.4904	-0.7541
																						81.125	0.2118	-0.0682	-5.2523	0.0199	0.1125	-3.9036	1.4752	2.1699	0.0625
																						81.187	0.2118	-0.0682	-5.2003	-0.0186	0.1195	-3.7876	0.7138	3.0674	0.5162
																						81.25	0.1857	-0.0682	-5.1613	-0.0011	0.1125	-3.7248	0.0158	2.3622	-0.3912
																						81.312	0.1987	-0.0813	-5.1418	0.0059	0.123	-3.6233	1.1579	3.0033	-0.8448
																						81.375	0.2248	-0.0552	-5.1028	0.0094	0.1265	-3.5314	1.2214	2.2981	0.5162
																						81.437	0.1727	-0.1074	-5.0508	0.0112	0.1072	-3.4541	0.8407	2.5545	0.0625
																						81.5	0.2118	-0.0682	-5.0183	0.0462	0.1002	-3.3599	1.0945	2.0416	-0.4819
																						81.562	0.2118	-0.0813	-4.9793	0.0287	0.1177	-3.2753	0.6503	1.7211	-0.5726
																						81.625	0.2118	-0.0813	-4.9403	0.0497	0.1002	-3.1956	0.7138	2.9392	-0.3912
																						81.687	0.2118	-0.0813	-4.9013	0.0059	0.1195	-3.1013	0.7772	3.0033	-0.3004
																						81.75	0.2248	-0.0813	-4.8558	0.0059	0.13	-3.053	1.1579	2.6186	-0.5726
																						81.812	0.1727	-0.0813	-4.8168	0.0024	0.109	-2.9998	0.5234	2.7468	0.3347
																						81.875	0.2118	-0.0813	-4.7843	0.0199	0.123	-2.8862	0.8407	2.4263	-0.3004
																						81.937	0.2248	-0.0943	-4.7258	0.0234	0.1055	-2.792	1.4752	2.4263	-0.2097
																						82	0.1857	-0.0813	-4.6934	0.0357	0.1142	-2.763	0.5869	2.6827	-0.6634
																						82.062	0.1987	-0.0682	-4.6479	0.0112	0.1248	-2.6567	0.1427	2.6186	-0.119
																						82.125	0.2248	-0.1074	-4.6024	0.0269	0.116	-2.6229	0.9676	2.2981	-0.9356
																						82.187	0.2118	-0.1074	-4.5699	0.0129	0.1125	-2.5238	-0.0476	2.4263	-0.0282
																						82.25	0.1857	-0.0943	-4.5114	0.0164	0.1335	-2.4779	0.7772	2.7468	-1.2985
																						82.312	0.2118	-0.0943	-4.4659	0.0112	0.1142	-2.4126	0.0158	2.1057	-0.9356
																						82.375	0.2118	-0.0682	-4.4594	0.0164	0.1265	-2.374	1.2214	2.4263	-0.3912
																						82.437	0.1987	-0.1074	-4.3944	0.0182	0.1072	-2.3063	1.1579	2.6186	-1.7522
																						82.5	0.2118	-0.0943	-4.3684	0.0041	0.1283	-2.2241	1.031	2.875	-1.2985
																						82.562	0.1857	-0.0813	-4.3229	0.0234	0.1265	-2.1903	1.729	2.2981	-1.5707
																						82.625	0.1857	-0.0943	-4.2774	0.0269	0.116	-2.142	0.6503	2.3622	-2.1151
																						82.687	0.1857	-0.1204	-4.2449	0.0374	0.1195	-2.0622	1.2214	2.8109	-1.2985
																						82.75	0.1727	-0.0552	-4.1929	0.0112	0.1212	-1.9873	1.4752	2.2981	-1.2078
																						82.812	0.1857	-0.1074	-4.1669	0.0129	0.1177	-1.9535	0.9676	2.4263	-1.7522
																						82.875	0.1857	-0.1465	-4.115	0.0217	0.1037	-1.8931	1.2848	2.234	-1.8429
																						82.937	0.1857	-0.1334	-4.076	0.0427	0.1072	-1.8568	0.6503	1.4647	-2.0244
																						83	0.1857	-0.0813	-4.0435	0.0304	0.1125	-1.794	1.5386	2.234	-1.6614
																						83.062	0.2248	-0.1204	-4.011	0.0164	0.1195	-1.7529	1.2848	2.234	-2.841
																						83.125	0.1727	-0.1074	-3.9525	0.0357	0.1212	-1.7119	1.2214	2.0416	-2.5688
																						83.187	0.1597	-0.1074	-3.9265	0.0199	0.137	-1.6297	1.2848	2.3622	-2.1151
																						83.25	0.1727	-0.1074	-3.8615	0.0041	0.1248	-1.6079	1.3483	1.9134	-2.5688
																						83.312	0.1857	-0.1074	-3.829	0.0164	0.1195	-1.5572	1.0945	2.2981	-1.48
																						83.375	0.1466	-0.1204	-3.777	0.0217	0.1283	-1.5258	1.5386	2.3622	-1.6614
																						83.437	0.1597	-0.1074	-3.7445	0.0304	0.13	-1.4871	0.9041	2.3622	-2.0244
																						83.5	0.1466	-0.1334	-3.7055	0.0234	0.1125	-1.4267	1.4117	2.4904	-1.5707
																						83.562	0.1597	-0.1074	-3.6665	0.0076	0.1248	-1.3784	0.7772	2.4904	-1.8429
																						83.625	0.1466	-0.1334	-3.6275	-0.0029	0.1072	-1.3687	0.5869	1.9134	-2.2966
																						83.687	0.1466	-0.0813	-3.5755	0.0041	0.1037	-1.3131	0.8407	2.0416	-2.2058
																						83.75	0.1336	-0.1334	-3.5301	0.0234	0.1195	-1.2406	1.1579	1.5929	-2.9317
																						83.812	0.1076	-0.1465	-3.4911	0.0234	0.116	-1.2358	1.2214	1.7852	-2.841
																						83.875	0.1466	-0.1204	-3.4456	-0.0134	0.1072	-1.1971	0.46	2.1699	-1.8429
																						83.937	0.1597	-0.1465	-3.4196	0.0269	0.116	-1.1488	0.46	1.5288	-2.6595
																						84	0.1466	-0.1334	-3.3806	-0.0046	0.1195	-1.1367	0.2696	1.5929	-2.478
																						84.062	0.1597	-0.1334	-3.3416	-0.0046	0.13	-1.0497	1.0945	2.2981	-4.0205
																						84.125	0.1206	-0.1334	-3.2961	0.0147	0.1212	-1.0473	0.6503	1.5929	-2.6595
																						84.187	0.1466	-0.1334	-3.2506	-0.0081	0.13	-1.0038	1.031	2.1057	-3.0224
																						84.25	0.1466	-0.1595	-3.2116	-0.0029	0.1353	-0.9893	0.9676	1.7852	-3.0224
																						84.312	0.1597	-0.1465	-3.1531	0.0059	0.1335	-0.9241	0.7138	2.4263	-2.841
																						84.375	0.1206	-0.1726	-3.1271	-0.0169	0.1107	-0.9362	0.9041	1.7211	-3.6576
																						84.437	0.1466	-0.1334	-3.0816	0.0006	0.1318	-0.8927	0.46	1.9134	-3.5668
																						84.5	0.1336	-0.1595	-3.0491	0.0234	0.1335	-0.8588	0.7138	1.5288	-3.5668
																						84.562	0.1076	-0.1726	-3.0101	0.0217	0.1212	-0.8468	1.2214	1.9134	-3.5668
																						84.625	0.1336	-0.1334	-2.9451	0.0199	0.13	-0.7984	1.0945	1.9134	-3.5668
																						84.687	0.1597	-0.1465	-2.9322	0.0076	0.1212	-0.7791	0.6503	1.5929	-3.4761
																						84.75	0.1206	-0.1726	-2.8802	0.0041	0.1318	-0.7453	0.7772	1.9775	-3.3854
																						84.812	0.1206	-0.1595	-2.8347	0.0199	0.1125	-0.7525	0.0793	1.657	-3.7483
																						84.875	0.0946	-0.1595	-2.7762	0.0147	0.1177	-0.7114	0.6503	1.7211	-4.1112
																						84.937	0.1206	-0.1726	-2.7502	0.0006	0.1283	-0.6849	1.2848	1.7211	-3.839
																						85	0.1076	-0.1986	-2.7047	0.0006	0.1283	-0.6849	-0.238	0.8236	-4.8371
																						85.062	0.1206	-0.1726	-2.6657	0.0252	0.1423	-0.6414	0.6503	1.8493	-4.4742
																						85.125	0.0946	-0.1726	-2.6332	-0.0099	0.1142	-0.6583	0.3965	1.5929	-4.4742
																						85.187	0.1336	-0.2117	-2.5747	0.0234	0.123	-0.6269	0.5869	1.657	-4.202
																						85.25	0.0946	-0.1595	-2.5617	-0.0064	0.1353	-0.6124	0.1427	1.5929	-4.3834
																						85.312	0.1076	-0.1726	-2.5097	0.0059	0.13	-0.5882	0.1427	1.4647	-3.839
																						85.375	0.0815	-0.1726	-2.4577	-0.0029	0.1423	-0.5423	1.2214	1.657	-4.3834
																						85.437	0.0815	-0.1726	-2.4187	0.0094	0.13	-0.5447	0.3965	1.5929	-5.2908
																						85.5	0.0685	-0.1595	-2.3862	-0.0029	0.1353	-0.5205	0.5234	1.4647	-4.5649
																						85.562	0.0685	-0.1856	-2.3602	0.0059	0.13	-0.5133	0.3965	1.4647	-5.3815
																						85.625	0.0815	-0.1856	-2.2823	-0.0186	0.123	-0.5157	0.2062	1.9134	-4.7464
																						85.687	0.0815	-0.1726	-2.2628	0.0024	0.137	-0.4891	-0.5552	1.657	-5.3815
																						85.75	0.0815	-0.1986	-2.2043	-0.0134	0.1248	-0.4746	0.5869	2.0416	-4.9278
																						85.812	0.0555	-0.1595	-2.1783	0.0147	0.1353	-0.4601	0.1427	1.8493	-5.2908
																						85.875	0.0946	-0.1465	-2.1328	0.0006	0.1248	-0.4166	0.7138	2.0416	-6.3796
																						85.937	0.0946	-0.1986	-2.0808	-0.0151	0.13	-0.4215	0.7772	1.9775	-6.1074
																						86	0.0555	-0.2117	-2.0548	0.0059	0.137	-0.3949	0.7138	1.5288	-7.1054
																						86.062	0.0685	-0.1856	-2.0223	0.0041	0.1248	-0.3901	0.2696	1.7211	-5.8352
																						86.125	0.0685	-0.1856	-1.9573	-0.0011	0.1476	-0.3828	0.3965	0.8236	-6.1981
																						86.187	0.0815	-0.1856	-1.9248	-0.0134	0.1318	-0.3901	-0.1745	1.2723	-6.0166
																						86.25	0.0555	-0.1986	-1.8793	-0.0099	0.1458	-0.3586	0.7772	2.234	-6.0166
																						86.312	0.0555	-0.1856	-1.8403	-0.0099	0.1388	-0.3586	-0.238	0.8236	-5.8352
																						86.375	0.0555	-0.1856	-1.8078	-0.0099	0.1388	-0.3224	0.5869	1.0159	-6.0166
																						86.437	0.0425	-0.1726	-1.7623	0.0147	0.1423	-0.3248	0.9676	1.657	-6.7425
																						86.5	0.0555	-0.1726	-1.7104	0.0129	0.13	-0.3417	0.9676	1.2723	-7.1054
																						86.562	0.0425	-0.1726	-1.6779	0.0112	0.1283	-0.3079	1.031	1.3365	-6.1981
																						86.625	0.0685	-0.1856	-1.6194	-0.0274	0.1212	-0.291	0.0158	2.234	-6.6518
																						86.687	0.0425	-0.1986	-1.5999	0.0041	0.1423	-0.2692	0.6503	1.08	-6.6518
																						86.75	0.0555	-0.1726	-1.5674	-0.0221	0.123	-0.2716	-0.1111	1.2082	-6.7425
																						86.812	0.0294	-0.2117	-1.5544	-0.0011	0.144	-0.2741	-0.0476	1.0159	-7.1962
																						86.875	0.0685	-0.1726	-1.4829	-0.0081	0.144	-0.2571	0.1427	0.8236	-7.2869
																						86.937	0.0294	-0.1595	-1.4374	0.0112	0.1177	-0.2475	0.7772	0.8236	-7.6498
																						87	0.0164	-0.1595	-1.3984	-0.0327	0.1335	-0.2547	0.2696	1.5929	-7.0147
																						87.062	0.0294	-0.1856	-1.3529	-0.0046	0.137	-0.2571	0.2062	0.8877	-8.0128
																						87.125	0.0425	-0.1595	-1.3139	-0.0186	0.1581	-0.2281	0.0793	0.6313	-8.1942
																						87.187	0.0164	-0.2117	-1.2749	-0.0046	0.1405	-0.2137	0.2062	0.7595	-8.1035
																						87.25	0.0294	-0.1986	-1.2359	-0.0291	0.1511	-0.2112	0.5234	1.2082	-7.8313
																						87.312	0.0294	-0.1856	-1.1839	-0.0169	0.1458	-0.204	0.1427	1.08	-7.8313
																						87.375	0.0164	-0.1856	-1.145	-0.0186	0.1405	-0.1919	0.3331	0.6313	-7.922
																						87.437	-0.0096	-0.1595	-1.0865	-0.0116	0.1476	-0.2088	0.1427	0.1825	-8.1035
																						87.5	0.0034	-0.1856	-1.054	-0.0169	0.1458	-0.1798	0.5234	0.8236	-8.0128
																						87.562	0.0294	-0.1856	-1.041	-0.0081	0.1335	-0.175	0.1427	1.3365	-8.4664
																						87.625	0.0034	-0.1856	-0.9695	0.0059	0.1388	-0.1532	0.9041	0.6954	-8.0128
																						87.687	-0.0487	-0.2117	-0.924	-0.0064	0.1318	-0.1653	0.5234	0.9518	-8.5572
																						87.75	0.0034	-0.1986	-0.8915	-0.0029	0.1388	-0.1702	0.7772	0.8236	-8.4664
																						87.812	-0.0096	-0.1986	-0.846	0.0041	0.1283	-0.1653	0.9676	1.4006	-8.0128
																						87.875	0.0034	-0.1595	-0.8005	-0.0064	0.1248	-0.1629	0.1427	0.9518	-7.922
																						87.937	0.0164	-0.1986	-0.768	-0.0327	0.1405	-0.146	0.46	1.0159	-9.3738
																						88	-0.0227	-0.1726	-0.7225	0.0059	0.1405	-0.1291	0.5234	0.9518	-9.4645
																						88.062	0.0034	-0.1726	-0.6835	-0.0099	0.1423	-0.1267	-0.3014	1.2723	-8.7386
																						88.125	-0.0096	-0.1986	-0.6445	-0.0064	0.1388	-0.1049	0.7772	0.8236	-8.9201
																						88.187	-0.0096	-0.1595	-0.6055	-0.0116	0.109	-0.1122	0.5234	0.8236	-8.3757
																						88.25	0.0034	-0.1856	-0.5731	-0.0221	0.1335	-0.1049	0.9676	1.0159	-8.8294
																						88.312	-0.0357	-0.2247	-0.5211	-0.0291	0.13	-0.117	0.6503	0.3107	-9.4645
																						88.375	-0.0357	-0.1726	-0.4886	-0.0081	0.137	-0.0928	0.9041	1.3365	-9.283
																						88.437	0.0294	-0.1986	-0.4496	0.0076	0.1283	-0.1146	0.0793	1.0159	-9.3738
																						88.5	-0.0096	-0.2117	-0.4171	-0.0064	0.1423	-0.1001	0.2062	0.6313	-8.8294
																						88.562	-0.0487	-0.1595	-0.3716	-0.0204	0.1388	-0.0783	0.5234	0.6954	-8.4664
																						88.625	-0.0227	-0.1856	-0.3131	-0.0116	0.1335	-0.0856	0.5234	0.9518	-8.7386
																						88.687	-0.0357	-0.1726	-0.3066	-0.0064	0.1177	-0.0807	1.031	0.5672	-8.7386
																						88.75	-0.0357	-0.1986	-0.2416	-0.0046	0.144	-0.0711	1.4117	0.8236	-9.5552
																						88.812	0.0164	-0.1465	-0.2091	-0.0239	0.1212	-0.0759	0.2062	1.0159	-8.8294
																						88.875	-0.0357	-0.1856	-0.1506	0.0094	0.1265	-0.0807	0.6503	0.8236	-9.3738
																						88.937	-0.0357	-0.1726	-0.1116	-0.0011	0.13	-0.0662	0.9041	1.2082	-9.283
																						89	-0.0487	-0.1986	-0.0791	0.0006	0.1212	-0.0807	0.3331	0.7595	-9.0108
																						89.062	-0.0357	-0.1986	-0.0336	0.0094	0.137	-0.0517	1.1579	1.08	-9.1016
																						89.125	-0.0487	-0.2117	0.0054	0.0129	0.1405	-0.0566	1.031	0.8236	-9.1016
																						89.187	-0.0357	-0.1726	0.0573	0.0059	0.137	-0.0517	1.2214	1.0159	-8.8294
																						89.25	-0.0617	-0.1856	0.0898	-0.0064	0.1458	-0.0493	1.031	1.3365	-8.9201
																						89.312	-0.0487	-0.1856	0.1288	-0.0046	0.1335	-0.0614	0.7138	0.8236	-9.1923
																						89.375	-0.0617	-0.1856	0.1743	0.0182	0.1283	-0.0517	0.8407	0.8877	-9.646
																						89.437	-0.0617	-0.1856	0.2068	-0.0064	0.1458	-0.0566	0.8407	0.8877	-9.3738
																						89.5	-0.0487	-0.1986	0.2588	0.0147	0.1142	-0.0421	0.9041	0.9518	-9.0108
																						89.562	-0.0748	-0.2117	0.2978	0.0129	0.13	-0.0252	1.0945	1.1441	-8.7386
																						89.625	-0.0617	-0.1856	0.3368	0.0112	0.1248	-0.0493	0.8407	1.2723	-8.8294
																						89.687	-0.0617	-0.1856	0.3823	0.0094	0.123	-0.0348	1.2848	1.4647	-9.0108
																						89.75	-0.0617	-0.1986	0.4213	0.0357	0.1248	-0.0348	1.1579	0.6954	-9.0108
																						89.812	-0.0487	-0.1856	0.4603	0.0252	0.1283	-0.0348	1.2848	1.08	-9.0108
																						89.875	-0.0617	-0.1726	0.4993	0.0024	0.109	-0.0252	1.5386	1.2082	-9.3738
																						89.937	-0.0487	-0.1726	0.5318	-0.0099	0.1142	-0.0324	0.7772	1.5929	-9.1923
																						90	-0.0748	-0.1856	0.5903	0.0094	0.1125	-0.0155	0.8407	1.2723	-9.646
																						90.062	-0.0617	-0.1856	0.6357	-0.0151	0.0739	-0.0397	0.9676	1.2723	-9.0108
																						90.125	-0.0748	-0.1726	0.6747	-0.0151	0.0879	-0.0324	1.2848	1.2082	-9.7367
																						90.187	-0.0878	-0.1986	0.7137	-0.0239	0.0827	-0.0131	0.9676	1.5288	-9.1016
																						90.25	-0.0878	-0.1856	0.7657	0.0024	0.109	-0.0083	0.9676	1.1441	-8.6479
																						90.312	-0.0878	-0.1856	0.7852	-0.0134	0.0862	0.0014	0.7772	0.8236	-9.283
																						90.375	-0.0878	-0.1986	0.8177	0.0059	0.0774	-0.0058	0.6503	0.6954	-9.1923
																						90.437	-0.1008	-0.1726	0.8762	-0.0064	0.0792	0.0111	1.2214	1.1441	-8.4664
																						90.5	-0.0878	-0.1986	0.9022	0.0147	0.0932	-0.0083	1.3483	1.1441	-9.0108
																						90.562	-0.0878	-0.1856	0.9412	-0.0011	0.0985	0.0014	1.4117	1.2082	-9.1923
																						90.625	-0.0617	-0.1726	0.9802	0.0094	0.0809	0.0207	1.0945	1.1441	-8.5572
																						90.687	-0.1138	-0.2247	1.0582	0.0112	0.0862	0.0207	1.0945	0.6313	-9.0108
																						90.75	-0.1008	-0.1856	1.0712	0.0112	0.0932	0.028	1.6021	1.0159	-9.1923
																						90.812	-0.1138	-0.1986	1.1102	0.0041	0.0827	0.0377	1.4117	1.3365	-8.8294
																						90.875	-0.0878	-0.1986	1.1622	-0.0011	0.0879	0.0546	1.5386	1.08	-9.1923
																						90.937	-0.1008	-0.1856	1.2141	-0.0116	0.0634	0.0449	0.9041	1.08	-9.1016
																						91	-0.0748	-0.1986	1.2401	0.0059	0.0739	0.0715	1.2848	1.2082	-9.0108
																						91.062	-0.1268	-0.1986	1.3051	0.0006	0.0721	0.057	0.7772	1.2082	-8.6479
																						91.125	-0.0878	-0.2378	1.3246	-0.0099	0.0686	0.0594	0.7138	0.7595	-9.4645
																						91.187	-0.1008	-0.1726	1.3766	-0.0011	0.0704	0.0497	1.1579	1.4647	-9.283
																						91.25	-0.1268	-0.1986	1.3896	0.0059	0.0669	0.0667	0.8407	1.4006	-9.646
																						91.312	-0.1008	-0.1856	1.4481	-0.0011	0.0458	0.0618	0.5869	1.2723	-9.1016
																						91.375	-0.1268	-0.1856	1.5001	0.0024	0.0318	0.0594	0.2696	0.8236	-9.1923
																						91.437	-0.1529	-0.1856	1.5456	0.0112	0.0336	0.0618	0.5234	0.6954	-9.7367
																						91.5	-0.1008	-0.1856	1.5651	-0.0011	0.0529	0.0957	0.9041	0.9518	-9.1923
																						91.562	-0.0878	-0.2117	1.6106	0.0006	0.0441	0.1029	0.5869	0.7595	-9.283
																						91.625	-0.1399	-0.1726	1.6496	0.0041	0.0546	0.0957	0.9041	1.3365	-8.5572
																						91.687	-0.1268	-0.2247	1.6886	0.0059	0.0388	0.0932	0.5869	1.0159	-9.283
																						91.75	-0.1789	-0.1986	1.7081	-0.0029	0.0476	0.1126	0.2696	0.9518	-9.9182
																						91.812	-0.1399	-0.1856	1.7731	0.0234	0.0458	0.1247	0.3965	1.2082	-9.1016
																						91.875	-0.1529	-0.2117	1.812	0.0041	0.0476	0.1271	0.2062	1.4006	-9.1923
																						91.937	-0.1138	-0.1726	1.8315	-0.0064	0.023	0.1102	0.5869	1.0159	-8.9201
																						92	-0.1399	-0.1856	1.8835	0.0059	0.0423	0.1392	0.7138	1.1441	-8.5572
																						92.062	-0.1399	-0.1726	1.929	0.0164	0.0318	0.1222	0.6503	0.4389	-9.1016
																						92.125	-0.1529	-0.1726	1.981	0.0059	0.0318	0.1488	0.7138	0.8877	-8.6479
																						92.187	-0.1529	-0.1856	2.02	0.0287	0.0371	0.1488	0.0158	1.08	-8.5572
																						92.25	-0.1659	-0.1856	2.046	0.0006	0.0371	0.1657	-0.1111	1.2082	-9.0108
																						92.312	-0.1659	-0.1856	2.0915	-0.0134	0.0125	0.1851	0.5234	1.4647	-9.1016
																						92.375	-0.1529	-0.2117	2.1305	0.0252	0.023	0.173	0.8407	0.8877	-9.283
																						92.437	-0.1659	-0.1856	2.176	-0.0081	0.0003	0.1826	0.3965	0.8236	-8.7386
																						92.5	-0.1789	-0.2117	2.2215	-0.0081	0.0073	0.2068	0.9041	1.08	-8.9201
																						92.562	-0.1789	-0.1726	2.2735	0.0147	0.0406	0.2237	0.46	1.1441	-8.0128
																						92.625	-0.192	-0.2117	2.2995	-0.0256	0.0108	0.2213	0.7138	0.8877	-8.5572
																						92.687	-0.1529	-0.1856	2.3255	-0.0274	-0.0015	0.2116	0.46	0.7595	-8.1942
																						92.75	-0.1659	-0.1856	2.384	-0.0134	0.016	0.2286	-0.1111	1.4647	-7.5591
																						92.812	-0.205	-0.1986	2.4294	-0.0151	0.0318	0.2431	-0.3014	1.2723	-8.1035
																						92.875	-0.205	-0.1986	2.4619	-0.0029	0.0195	0.2334	-0.1745	1.1441	-8.285
																						92.937	-0.192	-0.1856	2.5204	-0.0011	0.0248	0.2551	0.0793	0.3748	-8.0128
																						93	-0.1789	-0.1856	2.5529	-0.0081	0.0213	0.2672	0.0793	1.4006	-7.6498
																						93.062	-0.1659	-0.1856	2.5789	0.0024	0.0213	0.2648	-0.0476	1.0159	-8.4664
																						93.125	-0.205	-0.1856	2.6309	-0.0099	0.0301	0.2841	0.7772	0.6954	-8.4664
																						93.187	-0.205	-0.1856	2.6764	0.0024	0.0283	0.2841	0.5234	0.3107	-8.1942
																						93.25	-0.1789	-0.1986	2.7154	-0.0081	0.0248	0.3131	-0.238	1.5929	-7.922
																						93.312	-0.205	-0.2117	2.7544	-0.0116	0.0283	0.3131	0.9676	1.1441	-8.285
																						93.375	-0.205	-0.1856	2.7804	-0.0064	0.016	0.3131	0.7772	0.9518	-7.7406
																						93.437	-0.205	-0.1856	2.8324	0.0059	0.0248	0.3325	0.3965	1.3365	-8.3757
																						93.5	-0.218	-0.1856	2.8714	0.0094	0.0318	0.3711	1.1579	0.3107	-8.1942
																						93.562	-0.218	-0.1856	2.9234	-0.0064	0.0266	0.3687	0.3331	1.0159	-7.5591
																						93.625	-0.231	-0.1986	2.9624	-0.0099	0.023	0.3856	0.5234	0.5672	-8.0128
																						93.687	-0.231	-0.1856	2.9948	-0.0046	0.0213	0.3663	0.0158	1.2082	-7.6498
																						93.75	-0.231	-0.1986	3.0403	0.0094	-0.0103	0.3856	0.5869	0.8877	-7.3776
																						93.812	-0.205	-0.1856	3.0598	-0.0274	0.0301	0.4001	0.9041	0.6954	-7.1962
																						93.875	-0.2441	-0.1726	3.1183	-0.0029	0.0125	0.446	0.8407	0.7595	-7.5591
																						93.937	-0.218	-0.1856	3.1573	0.0059	-0.0103	0.4291	0.0158	0.5672	-7.2869
																						94	-0.218	-0.1726	3.1963	-0.0327	0.0213	0.4388	0.5234	0.8236	-7.1054
																						94.062	-0.2571	-0.2117	3.2483	0.0094	0.0178	0.4847	0.3331	0.8877	-7.2869
																						94.125	-0.2441	-0.1856	3.2938	-0.0116	0.0073	0.4847	-0.0476	0.8877	-6.924
																						94.187	-0.2701	-0.1856	3.3328	-0.0116	0.0143	0.4895	1.2214	0.503	-6.924
																						94.25	-0.2571	-0.1726	3.3718	-0.0186	0.0143	0.5016	0.0793	0.7595	-6.2888
																						94.312	-0.2701	-0.1856	3.4108	-0.0029	0.0125	0.5113	0.7772	0.3107	-6.7425
																						94.375	-0.231	-0.1986	3.4563	-0.0029	0.0195	0.5548	0.8407	0.503	-6.561
																						94.437	-0.2701	-0.1726	3.4693	-0.0046	0.0038	0.5499	1.0945	0.2466	-6.7425
																						94.5	-0.2571	-0.1726	3.5343	-0.0169	0.0266	0.5741	0.5234	0.6954	-6.4703
																						94.562	-0.2701	-0.1465	3.5668	-0.0134	0.0301	0.5959	0.5869	0.7595	-5.8352
																						94.625	-0.2571	-0.1726	3.6057	-0.0116	0.0038	0.6128	0.5869	0.8877	-6.2888
																						94.687	-0.2571	-0.1856	3.6577	-0.0256	-0.0068	0.6152	0.3331	0.7595	-6.0166
																						94.75	-0.2701	-0.1856	3.6837	-0.0274	0.016	0.6273	0.3965	0.9518	-5.7444
																						94.812	-0.2831	-0.2117	3.7357	-0.0291	0.0248	0.6659	0.7772	1.08	-6.1981
																						94.875	-0.231	-0.1595	3.7617	-0.0239	0.016	0.6877	0.7138	1.0159	-6.1981
																						94.937	-0.2831	-0.1595	3.8267	-0.0327	0.023	0.7094	1.4117	0.5672	-6.2888
																						95	-0.2831	-0.1856	3.8527	-0.0221	0.0353	0.7143	0.7772	0.8236	-6.4703
																						95.062	-0.2701	-0.2247	3.8852	-0.0379	0.009	0.7264	0.9041	0.8236	-5.4722
																						95.125	-0.2701	-0.1726	3.9177	-0.0379	0.0301	0.7529	0.5234	0.5672	-5.9259
																						95.187	-0.2831	-0.1595	3.9502	-0.0379	-0.0085	0.7723	0.5234	0.9518	-4.6556
																						95.25	-0.2701	-0.1726	4.0087	-0.0221	0.0213	0.7674	0.0158	1.08	-5.8352
																						95.312	-0.2701	-0.1595	4.0542	-0.0081	0.0423	0.8133	0.9676	0.7595	-4.8371
																						95.375	-0.2701	-0.1986	4.0932	0.0041	0.0301	0.8254	0.0793	0.1184	-4.2927
																						95.437	-0.2962	-0.1856	4.1387	-0.0256	0.0143	0.8665	0.9041	0.4389	-4.9278
																						95.5	-0.3092	-0.1595	4.1711	-0.0081	0.0143	0.881	0.1427	0.5672	-4.2927
																						95.562	-0.2962	-0.1595	4.2101	-0.0116	0.0073	0.9052	0.2696	1.3365	-4.7464
																						95.625	-0.2962	-0.1856	4.2296	-0.0362	-0.0033	0.9245	0.3965	0.9518	-4.6556
																						95.687	-0.2962	-0.1595	4.2881	-0.0186	-0.0103	0.9559	0.8407	0.8877	-4.5649
																						95.75	-0.3092	-0.1726	4.3141	-0.0239	0.016	0.9825	0.46	0.6313	-4.9278
																						95.812	-0.3092	-0.1595	4.3596	-0.0239	0.009	1.0236	1.0945	1.1441	-4.8371
																						95.875	-0.3222	-0.1465	4.3986	-0.0204	0.0195	1.0526	0.5869	0.7595	-3.839
																						95.937	-0.3092	-0.1726	4.4571	-0.0344	0.0266	1.0816	0.5234	0.9518	-4.2927
																						96	-0.3222	-0.1465	4.4766	-0.0362	0.0143	1.1275	0.2696	0.4389	-4.5649
																						96.062	-0.3222	-0.1595	4.5416	-0.0327	0.0143	1.1589	0.7138	0.6313	-4.2927
																						96.125	-0.3092	-0.1334	4.5741	-0.0397	0.0073	1.1806	1.0945	1.0159	-3.4761
																						96.187	-0.3352	-0.1726	4.6326	-0.0099	0.002	1.2048	1.031	0.6954	-4.6556
																						96.25	-0.2831	-0.1465	4.6781	-0.0099	0.009	1.2556	0.46	0.6313	-4.3834
																						96.312	-0.3352	-0.1595	4.7171	-0.0064	0.009	1.2821	1.031	0.6954	-4.6556
																						96.375	-0.3222	-0.1334	4.7625	-0.0467	0.0108	1.3256	0.5869	1.0159	-4.202
																						96.437	-0.3352	-0.1204	4.8015	-0.0186	-0.0103	1.3474	0.7138	0.2466	-4.202
																						96.5	-0.3092	-0.1204	4.8405	-0.0186	0.0178	1.3788	0.46	0.6313	-3.9298
																						96.562	-0.3222	-0.1204	4.8665	-0.0204	0.016	1.4175	0.8407	0.8877	-3.9298
																						96.625	-0.3222	-0.1465	4.9185	-0.0344	0.002	1.4344	0.3331	0.8877	-3.1132
																						96.687	-0.3613	-0.1204	4.9445	-0.0309	-0.005	1.4972	0.9676	0.7595	-3.839
																						96.75	-0.3482	-0.1465	4.9835	-0.0344	0.002	1.5044	0.3965	1.08	-3.0224
																						96.812	-0.3222	-0.1204	5.0225	-0.0274	0.002	1.5697	0.7772	0.4389	-2.7502
																						96.875	-0.2962	-0.1334	5.068	-0.0519	0.002	1.5987	0.7772	0.8236	-3.4761
																						96.937	-0.3482	-0.0813	5.1135	-0.0397	-0.0243	1.6253	0.0793	0.8877	-3.3854
																						97	-0.3092	-0.1204	5.146	-0.0309	-0.012	1.6615	0.3965	0.5672	-2.5688
																						97.062	-0.3352	-0.1334	5.185	-0.0344	-0.019	1.6953	0.2696	0.4389	-2.7502
																						97.125	-0.3222	-0.1334	5.2305	-0.0291	-0.0068	1.7678	1.1579	0.6954	-2.7502
																						97.187	-0.3222	-0.1204	5.263	-0.0221	-0.0033	1.8089	1.0945	0.8877	-3.4761
																						97.25	-0.3482	-0.1334	5.302	-0.0537	-0.0243	1.821	0.6503	0.5672	-3.3854
																						97.312	-0.3352	-0.1465	5.341	-0.0291	-0.0173	1.8621	0.3965	0.4389	-2.6595
																						97.375	-0.3482	-0.1334	5.3799	-0.0397	0.0038	1.9177	0.5234	0.8236	-2.9317
																						97.437	-0.3613	-0.1334	5.4384	-0.0554	-0.0155	1.9636	0.5234	0.4389	-2.7502
																						97.5	-0.3613	-0.1074	5.4579	-0.0362	-0.0208	2.0119	1.3483	0.2466	-2.3873
																						97.562	-0.3482	-0.1204	5.5034	-0.0204	-0.012	2.0796	1.2848	0.4389	-1.9336
																						97.625	-0.3482	-0.1204	5.5554	-0.0414	-0.0085	2.1134	0.6503	0.9518	-2.5688
																						97.687	-0.3352	-0.1074	5.5944	-0.0467	-0.0103	2.1617	1.031	1.08	-2.2966
																						97.75	-0.3482	-0.1595	5.6334	-0.0291	0.0073	2.2294	1.2214	1.2723	-1.8429
																						97.812	-0.3352	-0.1204	5.6724	-0.0274	-0.0085	2.2463	0.7138	1.0159	-1.6614
																						97.875	-0.3613	-0.1204	5.7244	-0.0011	-0.0243	2.3043	1.6655	0.8236	-1.2078
																						97.937	-0.3482	-0.1074	5.7569	0.0059	-0.0138	2.3454	1.1579	1.7211	-1.5707
																						98	-0.3352	-0.1074	5.8089	0.0182	-0.0296	2.4058	0.8407	0.8877	-1.8429
																						98.062	-0.3352	-0.0943	5.8414	-0.0344	0.002	2.4759	0.7772	1.08	-1.2985
																						98.125	-0.3092	-0.1074	5.8869	-0.0327	-0.0068	2.5024	0.7138	1.4006	-1.6614
																						98.187	-0.3352	-0.0943	5.9324	-0.0099	-0.019	2.5774	1.6021	1.2723	-1.5707
																						98.25	-0.3222	-0.1074	5.9713	0.0024	-0.0243	2.6039	1.2848	1.08	-2.1151
																						98.312	-0.2962	-0.1074	6.0103	-0.0327	-0.0068	2.6885	1.7924	1.3365	-2.3873
																						98.375	-0.3092	-0.1074	6.0428	0.0059	-0.0243	2.7054	1.4752	0.7595	-2.2058
																						98.437	-0.3352	-0.1074	6.0818	-0.0029	-0.019	2.7803	2.3	1.08	-1.7522
																						98.5	-0.3222	-0.1204	6.1208	-0.0011	-0.0208	2.8166	1.5386	1.2082	-1.9336
																						98.562	-0.3613	-0.0813	6.1663	-0.0099	-0.012	2.8697	1.2848	0.5672	-1.6614
																						98.625	-0.3222	-0.1074	6.1988	-0.0134	-0.026	2.9567	1.2848	0.6954	-1.2078
																						98.687	-0.3352	-0.0813	6.2313	-0.0186	-0.0243	3.0196	1.9828	0.8877	-1.0263
																						98.75	-0.3352	-0.0943	6.2768	0.0006	-0.012	3.0776	1.2214	0.7595	-1.8429
																						98.812	-0.3352	-0.0943	6.3093	-0.0291	-0.0208	3.1259	1.0945	1.2723	-1.3892
																						98.875	-0.3482	-0.0813	6.3743	-0.0046	-0.0313	3.2008	1.7924	0.4389	-1.3892
																						98.937	-0.3482	-0.1074	6.4068	-0.0064	-0.026	3.254	1.6021	0.7595	-1.117
																						99	-0.3222	-0.1074	6.4458	-0.0081	-0.0208	3.324	1.6655	0.9518	-1.6614
																						99.062	-0.3613	-0.0943	6.4913	-0.0309	-0.0296	3.3869	1.4117	0.6954	-1.2985
																						99.125	-0.3092	-0.0943	6.5238	-0.0186	-0.0629	3.4521	1.9193	1.08	-0.6634
																						99.187	-0.3482	-0.0682	6.5497	-0.0291	-0.0453	3.5174	1.9828	1.1441	-1.5707
																						99.25	-0.3222	-0.0552	6.5887	-0.0221	-0.0313	3.5874	1.2214	0.2466	-1.2078
																						99.312	-0.3092	-0.0552	6.6472	-0.0362	-0.0243	3.6817	1.729	0.3748	-0.3912
																						99.375	-0.3352	-0.0682	6.6992	-0.0221	-0.0383	3.759	2.0462	1.08	-1.2078
																						99.437	-0.3092	-0.0422	6.7382	-0.0116	-0.0348	3.8291	2.3635	1.0159	-1.48
																						99.5	-0.3482	-0.0682	6.8032	-0.0432	-0.0208	3.8992	1.729	1.2723	-1.3892
																						99.562	-0.3352	-0.0552	6.8097	-0.0081	-0.0313	3.9789	2.6173	1.1441	-1.7522
																						99.625	-0.3613	-0.0422	6.8617	-0.0046	-0.0348	4.0248	2.0462	1.2082	-0.8448
																						99.687	-0.3743	-0.0291	6.9007	-0.0081	-0.0208	4.1239	2.1097	1.2723	-1.0263
																						99.75	-0.3482	-0.0291	6.9462	0.0076	-0.0296	4.177	1.9193	1.2082	-1.0263
																						99.812	-0.3352	-0.0422	6.9917	-0.0116	-0.0488	4.223	1.8559	1.4006	-0.9356
																						99.875	-0.3482	-0.003	7.0242	0.0182	-0.0296	4.3559	2.3635	0.7595	-0.7541
																						99.937	-0.3092	-0.0161	7.0632	-0.0064	-0.0331	4.3994	2.4269	1.3365	-1.2985
																						100	-0.3613	-0.003	7.0892	-0.0256	-0.0664	4.4767	2.0462	1.08	-1.117
																						100.062	-0.3482	-0.0291	7.1346	-0.0011	-0.0594	4.5419	1.9828	0.7595	-1.7522
																						100.125	-0.3482	-0.0552	7.1801	-0.0274	-0.0646	4.6507	2.1731	1.08	-0.6634
																						100.187	-0.3352	-0.0161	7.2191	-0.0169	-0.0471	4.7038	2.3635	1.1441	-1.2985
																						100.25	-0.3743	-0.0291	7.2451	-0.0239	-0.0471	4.7957	2.1731	1.4647	-0.4819
																						100.312	-0.3482	-0.0161	7.2776	-0.0046	-0.0594	4.8367	1.5386	1.4647	-1.117
																						100.375	-0.3482	-0.0422	7.3101	0.0076	-0.0418	4.9261	2.1731	0.8236	-1.2985
																						100.437	-0.3613	-0.0161	7.3881	0.0059	-0.0418	5.0301	2.5538	1.2082	-0.2097
																						100.5	-0.3613	-0.0291	7.4076	0.0112	-0.0541	5.076	2.4269	0.9518	-1.117
																						100.562	-0.3873	0.0231	7.4401	0.0357	-0.0541	5.1678	1.7924	1.4647	-1.117
																						100.625	-0.3743	-0.003	7.4791	0.0234	-0.0418	5.233	1.6655	1.08	-1.0263
																						100.687	-0.3873	-0.003	7.5116	0.0164	-0.0453	5.3659	2.4269	1.3365	-0.7541
																						100.75	-0.3873	-0.0161	7.5701	-0.0081	-0.0524	5.4167	2.1731	1.7211	-1.48
																						100.812	-0.4003	0.0361	7.6156	0.0147	-0.0471	5.5182	2.3635	1.0159	-0.5726
																						100.875	-0.3873	0.0231	7.6351	-0.0169	-0.0436	5.5955	2.0462	1.2082	-0.2097
																						100.937	-0.3743	-0.003	7.7001	-0.0081	-0.0629	5.7139	2.7442	1.1441	-0.9356
																						101	-0.3613	-0.003	7.7455	-0.0064	-0.0524	5.784	1.6021	1.1441	-0.3912
																						101.062	-0.3873	-0.003	7.778	0.0024	-0.0524	5.9193	2.3635	1.1441	-1.48
																						101.125	-0.3873	0.01	7.83	0.0129	-0.0629	5.9652	1.9828	1.2723	0.3347
																						101.187	-0.4003	0.0231	7.869	-0.0046	-0.0418	6.0619	2.4269	1.2082	-0.0282
																						101.25	-0.4264	0.01	7.921	0.0147	-0.0576	6.1851	1.9193	1.2082	-0.6634
																						101.312	-0.3743	-0.003	7.973	0.0059	-0.0664	6.2866	2.4269	0.8236	-1.3892
																						101.375	-0.4003	0.0361	7.9925	0.0304	-0.0453	6.3615	2.4269	0.6954	-0.2097
																						101.437	-0.3743	0.0231	8.0445	0.0076	-0.0506	6.4268	1.8559	1.5288	-0.119
																						101.5	-0.4003	0.0622	8.09	-0.0081	-0.0524	6.5089	2.0462	0.9518	-0.6634
																						101.562	-0.4003	0.0231	8.129	0.0024	-0.0436	6.6563	2.6173	1.4006	-0.119
																						101.625	-0.4134	0.0361	8.1485	0.0024	-0.0559	6.7022	1.6021	1.1441	-0.7541
																						101.687	-0.4003	0.0361	8.194	0.0129	-0.0594	6.7723	2.5538	0.9518	-0.6634
																						101.75	-0.4264	0.01	8.22	0.0199	-0.0524	6.8907	2.2366	0.8877	-1.117
																						101.812	-0.4264	0.0231	8.272	-0.0116	-0.0629	6.9753	2.1097	1.1441	-0.5726
																						101.875	-0.4134	0.0491	8.3174	0.0129	-0.0453	7.0695	2.4904	1.657	0.244
																						101.937	-0.4524	0.0491	8.3434	0.0164	-0.0383	7.1372	2.1097	1.4006	-0.3004
																						102	-0.4264	0.0491	8.3759	0.0217	-0.0436	7.2556	2.0462	1.3365	-0.3912
																						102.062	-0.4264	0.0491	8.4279	0.0094	-0.0418	7.3257	2.1097	1.657	-0.0282
																						102.125	-0.4524	0.0491	8.4604	0.0199	-0.0559	7.4393	2.1731	1.5929	-0.119
																						102.187	-0.4394	0.0491	8.5059	-0.0221	-0.0418	7.5045	2.3635	1.657	-0.7541
																						102.25	-0.4785	0.0491	8.5319	-0.0064	-0.0716	7.6205	2.2366	1.5288	-0.3912
																						102.312	-0.4524	0.0491	8.5774	-0.0116	-0.0488	7.7196	2.3635	1.0159	-0.5726
																						102.375	-0.4524	0.0622	8.6099	0.0252	-0.0471	7.7244	2.2366	1.0159	-1.0263
																						102.437	-0.4264	0.0622	8.5969	-0.0011	-0.0629	7.5867	1.9193	0.9518	-0.3912
																						102.5	-0.4524	0.0491	8.5969	0.0024	-0.0348	7.4465	1.9828	1.7852	-1.2985
																						102.562	-0.4655	0.0361	8.5579	-0.0029	-0.0225	7.2435	1.2214	1.2723	-1.2985
																						102.625	-0.4394	0.0622	8.5059	-0.0204	-0.0085	7.0647	2.1097	1.657	-0.8448
																						102.687	-0.4785	0.0752	8.4864	-0.0046	-0.0278	6.8931	1.4117	1.7211	-0.4819
																						102.75	-0.4785	0.0752	8.4474	0.0182	-0.026	6.8013	2.2366	1.2723	-0.5726
																						102.812	-0.4524	0.0883	8.4019	0.0094	-0.0138	6.6032	2.0462	1.3365	-1.6614
																						102.875	-0.4524	0.0622	8.3759	0.0287	0.0195	6.4823	2.3	1.5929	-1.6614
																						102.937	-0.4655	0.0752	8.3304	-0.0327	0.0073	6.318	2.2366	1.4006	-1.2078
																						103	-0.4394	0.0622	8.2915	-0.0309	0.009	6.2093	2.3	1.2082	-0.9356
																						103.062	-0.4524	0.0622	8.272	-0.0221	0.0073	6.0498	1.8559	1.657	-1.3892
																						103.125	-0.4655	0.1013	8.2395	-0.0204	0.0266	5.9169	2.1731	1.4647	-1.117
																						103.187	-0.4394	0.0622	8.1875	0.0129	0.0213	5.7767	1.7924	0.6954	-1.0263
																						103.25	-0.4394	0.0491	8.142	-0.0309	0.0546	5.6728	2.3635	1.5288	-0.9356
																						103.312	-0.4655	0.0752	8.1095	-0.0239	0.0371	5.5206	1.8559	1.4006	-0.4819
																						103.375	-0.4394	0.0491	8.0705	-0.0151	0.0318	5.4312	2.1097	1.4006	-1.8429
																						103.437	-0.4524	0.0491	8.0315	-0.0151	0.0388	5.3176	2.4904	1.0159	-1.9336
																						103.5	-0.4394	0.0622	7.999	-0.0186	0.0353	5.1702	1.9828	0.6313	-1.3892
																						103.562	-0.4524	0.0491	7.947	-0.0274	0.0266	5.0591	2.1097	1.0159	-1.7522
																						103.625	-0.4524	0.0883	7.9015	-0.0414	0.0301	4.9044	1.9193	1.5929	-1.5707
																						103.687	-0.4264	0.1143	7.8625	-0.0362	0.0353	4.8005	1.7924	0.9518	-1.9336
																						103.75	-0.4264	0.0622	7.8105	-0.0221	0.0599	4.7063	2.4904	1.2723	-2.7502
																						103.812	-0.4134	0.0231	7.7845	-0.0449	0.0686	4.612	1.9828	0.2466	-1.8429
																						103.875	-0.4655	0.0622	7.726	-0.0362	0.0564	4.4622	2.0462	0.6954	-1.6614
																						103.937	-0.4655	0.0491	7.6936	-0.0379	0.0546	4.3462	1.5386	1.08	-1.48
																						104	-0.4524	0.0622	7.6481	-0.0204	0.0476	4.2689	1.5386	0.5672	-1.2078
																						104.062	-0.4394	0.0752	7.6221	-0.0309	0.0476	4.1215	1.2848	1.4647	-1.8429
																						104.125	-0.4524	0.0752	7.5571	-0.0256	0.0669	4.0393	2.1731	0.6954	-2.2058
																						104.187	-0.4394	0.0622	7.5311	-0.0309	0.0686	3.9499	1.6021	0.8877	-1.3892
																						104.25	-0.4394	0.0491	7.4791	-0.0327	0.0599	3.8315	1.6655	0.4389	-1.7522
[truncated: 818 more rows]
[truncated: 134 more columns]

## Sheet: T6-T7
Specimen 1																																	Specimen 2
[truncated: 2,118 more rows]
[truncated: 99 more columns]

[truncated: 2 more sheets: T7-T8, T8-T9]
