# Supplementary material for: In vitro analysis of the segmental flexibility of the thoracic spine
Source: PLoS One. 2017 May 16;12(5):e0177823. doi: 10.1371/journal.pone.0177823 (PMC5433776; doi:10.1371/journal.pone.0177823)
Supplement: S5 Dataset — The hysteresis curves of the third loading cycle of all experiments regarding the segmental levels T1-T2, T2-T3, T3-T4, and T4-T5 are depicted. (XLSX) [file pone.0177823.s005.xlsx]

## Sheet: T1-T2
	Specimen 1										Specimen 2										Specimen 3										Specimen 4										Specimen 5
Lateral bending
Flexion/Extension
Axial rotation

## Sheet: T2-T3
	Specimen 1										Specimen 2										Specimen 3										Specimen 4										Specimen 5
Lateral bending
Flexion/Extension
Axial rotation

## Sheet: T3-T4
	Specimen 1										Specimen 2										Specimen 3										Specimen 4										Specimen 5
Lateral bending
Flexion/Extension
Axial rotation

## Sheet: T4-T5
	Specimen 1										Specimen 2										Specimen 3										Specimen 4										Specimen 5
Lateral bending
Flexion/Extension
Axial rotation
